# Supplementary material for: A progressive learning method for predicting the band gap of ABO3 perovskites using an instrumental variable
Source: Royal Society of Chemistry journal article supplement (doi:10.1039/c9tc06632b), 2020-01-01
Supplement: c9tc06632b1.xlsx [file c9tc06632b1.xlsx]

## Sheet: Supplementary data1
Supplementary Data1-The Dataset Generated From Materials Project
num	formula	Ef	Eg	density	spg_num	volume	a	b	c	alpha	beta	gamma	n_atom	Z_mea	Z_std	G_mea	G_std	P_mea	P_std	M_mea	M_std	Vmol_mea	Vmol_std	Ra_mea	Ra_std	Ri_mea	Ri_std	Rvdw_mea	Rvdw_std	Rc_mea	Rc_std	X_mea	X_std	EA_mea	EA_std	ER_mea	ER_std	TCD_mea	TCD_std	Tb_mea	Tb_std	Tm_mea	Tm_std	Tc_mea	Tc_std	Ef_mea	Ef_std	FIE_mea	FIE_std
0	AcCrO3	-3.14342	1.7684	8.55254	221	63.4884	3.98931	3.98931	3.98931	90	90	90	5	27.4	31.4172	11.4	5.71314	3.8	2.71293	65.3989	81.9945	16.372	4.99344	1.03	0.554617	1.196	0.128	195.6	57.1265	1.046	0.545586	2.616	1.02461	104.2	46.0648	2.54e-08	5.08e-08	21.2159	36.6863	1357.52	1564.84	733.48	874.274	92.76	75.7382	7.0332	8.59149	1018.18	364.344
1	AcFeO3	-2.88805	0.9888	8.49229	221	64.6914	4.01435	4.01435	4.01436	90.0001	90	90	5	27.8	31.3841	11.8	5.38145	3.8	2.71293	66.1686	81.883	16.344	5.04475	1.03	0.554617	1.1785	0.163	195.4	56.9547	1.034	0.540503	2.65	0.994706	94.2534	57.5445	2e-08	4e-08	18.4159	31.1393	1395.52	1604.7	659.68	756.726	92.76	75.7382	5.6932	6.70112	1040.1	344.463
2	AgAsO3	-1.2618	0.4985	5.32052	29	1728.7	6.75552	12.7908	20.0061	90	90	90	120	20.8	16.2899	14.8	1.93907	3	1.26491	46.1576	38.3774	15.06	2.94164	0.91	0.405463	1.10533	0.232566	178.2	40.1915	0.896	0.317591	2.886	0.683099	125.224	24.5579	6.93e-08	1.31e-07	96.0159	168.11	718.52	912.036	497.866	544.575	432.76	636.443	7.9332	10.7745	1123.4	242.049
3	AgIO3	-0.72861	2.4375	5.65583	29	664.167	5.89722	7.26061	15.5116	90	90	90	40	24.8	20.663	15.2	2.13542	3.2	1.46969	56.5542	50.0327	17.614	4.89561	0.96	0.445421	1.228	0.0708551	181.4	41.4613	0.928	0.352727	2.982	0.606577	168.741	63.4846	200000000000000	400000000000000	86.1057	171.947	632.6	912.352	357.236	457.302	256.56	287.524	3.9452	4.69537	1135.68	234.219
4	AgIO3	-0.701432	1.9765	5.6576	62	331.98	5.91506	6.64582	8.44508	90	90	90	20	24.8	20.663	15.2	2.13542	3.2	1.46969	56.5542	50.0327	17.614	4.89561	0.96	0.445421	1.228	0.0708551	181.4	41.4613	0.928	0.352727	2.982	0.606577	168.741	63.4846	200000000000000	400000000000000	86.1057	171.947	632.6	912.352	357.236	457.302	256.56	287.524	3.9452	4.69537	1135.68	234.219
5	AgSbO3	-1.40177	0.2887	6.42037	5	430.825	8.16571	8.31748	8.31748	110.252	109.428	109.474	30	24.4	20.1256	14.8	1.93907	3.2	1.46969	55.5253	48.608	16.108	2.93665	0.97	0.455631	1.13933	0.168607	190	49.0265	0.936	0.362745	2.86	0.711365	129.895	15.6584	8.33e-08	1.58e-07	90.8159	169.846	913.12	1024.14	460.622	507.94	92.76	75.7382	6.3332	7.94205	1100.8	261.924
6	AgSbO3	-1.44563	0.1078	6.37524	148	144.625	6.49333	6.49332	6.49334	49.3089	49.3089	49.309	10	24.4	20.1256	14.8	1.93907	3.2	1.46969	55.5253	48.608	16.108	2.93665	0.97	0.455631	1.13933	0.168607	190	49.0265	0.936	0.362745	2.86	0.711365	129.895	15.6584	8.33e-08	1.58e-07	90.8159	169.846	913.12	1024.14	460.622	507.94	92.76	75.7382	6.3332	7.94205	1100.8	261.924
7	AgSbO3	-1.44019	0.0871	6.49978	227	283.708	7.37557	7.37557	7.37557	60	60	60	20	24.4	20.1256	14.8	1.93907	3.2	1.46969	55.5253	48.608	16.108	2.93665	0.97	0.455631	1.13933	0.168607	190	49.0265	0.936	0.362745	2.86	0.711365	129.895	15.6584	8.33e-08	1.58e-07	90.8159	169.846	913.12	1024.14	460.622	507.94	92.76	75.7382	6.3332	7.94205	1100.8	261.924
8	AlBO3	-3.13361	5.8309	3.49722	167	81.4699	5.31444	5.31444	5.31444	50.1609	50.1609	50.1609	10	8.4	2.57682	14.8	1.46969	2.2	0.4	17.1581	5.30685	13.294	5.28637	0.78	0.254165	0.973	0.361353	173.4	30.4998	0.8	0.233238	2.794	0.802785	98.3358	52.4319	200000000000	400000000000	52.4159	91.8878	1452.52	1726.88	689.374	896.883	92.76	75.7382	12.2732	19.295	1063.42	313.708
9	AlBiO3	-2.48926	3.0461	6.63925	14	284.084	7.20714	5.0945	8.68304	90	116.992	90	20	24	29.5635	15.2	1.16619	3	1.54919	56.792	76.213	16.678	3.67278	0.93	0.419047	1.098	0.228749	191	53.1413	0.932	0.366955	2.79	0.806573	111.123	39.7305	2.65e-07	5.17e-07	48.6159	93.2432	979.92	1130.75	328.454	357.026	92.76	75.7382	4.4532	5.18253	1043.9	331.96
10	AlBiO3	-2.44672	1.586	8.68068	221	54.3191	3.78719	3.78719	3.78719	90	90	90	5	24	29.5635	15.2	1.16619	3	1.54919	56.792	76.213	16.678	3.67278	0.93	0.419047	1.098	0.228749	191	53.1413	0.932	0.366955	2.79	0.806573	111.123	39.7305	2.65e-07	5.17e-07	48.6159	93.2432	979.92	1130.75	328.454	357.026	92.76	75.7382	4.4532	5.18253	1043.9	331.96
11	AlBiO3	-2.51476	2.9779	8.29603	161	113.675	5.45999	5.46	5.46	59.457	59.4572	59.4572	10	24	29.5635	15.2	1.16619	3	1.54919	56.792	76.213	16.678	3.67278	0.93	0.419047	1.098	0.228749	191	53.1413	0.932	0.366955	2.79	0.806573	111.123	39.7305	2.65e-07	5.17e-07	48.6159	93.2432	979.92	1130.75	328.454	357.026	92.76	75.7382	4.4532	5.18253	1043.9	331.96
12	AlCoO3	-2.19325	1.1284	5.19086	62	171.353	4.76981	4.92083	7.3005	89.9999	90.0014	89.9994	20	12.8	7.35935	14	2.75681	2.6	0.8	26.7826	16.6285	13.75	4.545	0.88	0.344384	1.04467	0.265375	183	40.694	0.868	0.279886	2.762	0.834755	105.713	43.751	1.74e-08	2.37e-08	67.0159	92.4871	1252.52	1429.38	573.174	687.54	92.76	75.7382	5.5132	6.70971	1055.38	320.776
13	AlCoO3	-2.30498	0.8609	4.45328	15	199.734	6.36789	6.36789	5.03023	82.3571	97.6429	95.4958	20	12.8	7.35935	14	2.75681	2.6	0.8	26.7826	16.6285	13.75	4.545	0.88	0.344384	1.04467	0.265375	183	40.694	0.868	0.279886	2.762	0.834755	105.713	43.751	1.74e-08	2.37e-08	67.0159	92.4871	1252.52	1429.38	573.174	687.54	92.76	75.7382	5.5132	6.70971	1055.38	320.776
14	AlCoO3	-2.29132	0.7975	4.76984	1	93.2391	4.85975	5.3256	4.96478	87.2456	59.5178	116.02	10	12.8	7.35935	14	2.75681	2.6	0.8	26.7826	16.6285	13.75	4.545	0.88	0.344384	1.04467	0.265375	183	40.694	0.868	0.279886	2.762	0.834755	105.713	43.751	1.74e-08	2.37e-08	67.0159	92.4871	1252.52	1429.38	573.174	687.54	92.76	75.7382	5.5132	6.70971	1055.38	320.776
15	AlCrO3	-2.7222	1.7164	4.4152	62	191.02	5.01951	5.05239	7.53218	90	90	90	20	12.2	6.20967	13.4	3.87814	2.6	0.8	25.3952	13.964	13.862	4.37279	0.89	0.358329	1.079	0.236989	184	42.1189	0.892	0.309218	2.718	0.884407	105.798	43.6696	3.08e-08	4.92e-08	65.8159	92.0894	1201.32	1361.69	655.574	834.732	92.76	75.7382	6.3732	8.14616	1033.88	342.681
16	AlCuO3	-2.06567	0.35	4.63698	14	198.429	4.70912	6.78167	6.23275	90	94.5179	90	20	13.2	8.13388	14.4	2.05913	2.6	0.8	27.7051	18.4183	13.838	4.4093	0.88	0.344384	1.055	0.255225	182.6	40.1378	0.876	0.289109	2.766	0.830556	116.77	38.444	8.84e-09	1.13e-08	127.016	164.049	1252.52	1429.38	491.128	550.978	92.76	75.7382	4.8932	5.77115	1052.4	323.56
17	AlFeO3	-2.16859	1.6813	4.8436	62	179.404	4.88617	4.93584	7.43878	90.0406	90.0189	89.9888	20	12.6	6.97424	13.8	3.1241	2.6	0.8	26.1649	15.4375	13.834	4.41541	0.89	0.358329	1.0615	0.249508	183.8	41.8301	0.88	0.293939	2.752	0.845492	95.8518	55.9306	2.54e-08	3.87e-08	63.0159	91.4002	1239.32	1411.53	581.774	702.537	92.76	75.7382	5.0332	5.97348	1055.8	320.391
18	AlFeO3	-2.58256	2.1089	4.71611	62	184.253	4.8833	5.12029	7.36897	90	90	90	20	12.6	6.97424	13.8	3.1241	2.6	0.8	26.1649	15.4375	13.834	4.41541	0.89	0.358329	1.0615	0.249508	183.8	41.8301	0.88	0.293939	2.752	0.845492	95.8518	55.9306	2.54e-08	3.87e-08	63.0159	91.4002	1239.32	1411.53	581.774	702.537	92.76	75.7382	5.0332	5.97348	1055.8	320.391
19	AlFeO3	-2.63523	2.0326	4.2384	4	410.041	5.04412	8.66921	9.37698	89.9945	89.9941	90.0172	40	12.6	6.97424	13.8	3.1241	2.6	0.8	26.1649	15.4375	13.834	4.41541	0.89	0.358329	1.0615	0.249508	183.8	41.8301	0.88	0.293939	2.752	0.845492	95.8518	55.9306	2.54e-08	3.87e-08	63.0159	91.4002	1239.32	1411.53	581.774	702.537	92.76	75.7382	5.0332	5.97348	1055.8	320.391
20	AlFeO3	-2.63523	2.0587	4.23337	33	410.528	5.04314	8.65641	9.40381	90	90	90	40	12.6	6.97424	13.8	3.1241	2.6	0.8	26.1649	15.4375	13.834	4.41541	0.89	0.358329	1.0615	0.249508	183.8	41.8301	0.88	0.293939	2.752	0.845492	95.8518	55.9306	2.54e-08	3.87e-08	63.0159	91.4002	1239.32	1411.53	581.774	702.537	92.76	75.7382	5.0332	5.97348	1055.8	320.391
21	AlGaO3	-2.75356	2.6071	5.26875	62	182.422	4.88923	5.00953	7.44802	90	90	90	20	13.6	8.91291	14.8	1.46969	2.6	0.8	28.9405	20.8301	14.776	3.21552	0.87	0.331059	1.043	0.267125	181.4	38.5206	0.878	0.291506	2.748	0.84988	101.236	48.6714	3.34e-08	5.43e-08	52.8159	91.7806	1107.92	1250.42	280.156	340.498	92.76	75.7382	3.3912	4.2044	1019.06	360.002
22	AlGaO3	-2.83348	3.2132	4.81593	33	399.15	5.00168	8.60148	9.27784	90	90	90	40	13.6	8.91291	14.8	1.46969	2.6	0.8	28.9405	20.8301	14.776	3.21552	0.87	0.331059	1.043	0.267125	181.4	38.5206	0.878	0.291506	2.748	0.84988	101.236	48.6714	3.34e-08	5.43e-08	52.8159	91.7806	1107.92	1250.42	280.156	340.498	92.76	75.7382	3.3912	4.2044	1019.06	360.002
23	AlGaO3	-2.83269	3.1117	4.87111	33	394.628	4.99509	8.62503	9.15976	90	90	90	40	13.6	8.91291	14.8	1.46969	2.6	0.8	28.9405	20.8301	14.776	3.21552	0.87	0.331059	1.043	0.267125	181.4	38.5206	0.878	0.291506	2.748	0.84988	101.236	48.6714	3.34e-08	5.43e-08	52.8159	91.7806	1107.92	1250.42	280.156	340.498	92.76	75.7382	3.3912	4.2044	1019.06	360.002
24	AlMoO3	-2.52419	1.7375	5.10115	62	222.553	5.22137	5.19459	8.20535	89.9946	90.0004	89.9998	20	15.8	13.2424	13.4	3.87814	2.8	1.16619	34.1839	31.1696	14.292	3.76263	0.9	0.372827	1.046	0.263996	184	42.1189	0.924	0.354717	2.818	0.781394	107.372	42.2646	1.64e-08	2.2e-08	74.8159	96.4975	1594.92	1961.05	798.774	1102.45	92.76	75.7382	9.4732	13.8703	1040.16	335.862
25	AlNiO3	-1.92206	0.5045	4.97964	62	178.301	4.56356	4.88115	8.0044	89.9837	90.0005	90.0034	20	13	7.74597	14.2	2.4	2.6	0.8	26.7346	16.5358	13.734	4.56997	0.88	0.344384	1.039	0.271448	183	40.694	0.866	0.277676	2.768	0.828478	115.245	38.4701	1.98e-08	2.81e-08	65.2159	91.9134	1249.72	1425.57	565.174	673.684	92.76	75.7382	5.7132	7.03242	1050.72	325.167
26	AlTlO3	-2.20506	0.7377	8.65946	62	214.283	5.25126	5.36047	7.61239	90	90	90	20	23.6	28.7653	14.8	1.46969	3	1.54919	55.8726	74.3771	15.86	2.9305	0.99	0.52	1.1575	0.242879	187	46.6476	0.92	0.348712	2.71	0.894069	100.213	49.9533	3.54e-08	5.82e-08	56.2159	91.1481	961.72	1117.47	334.974	361.183	92.76	75.7382	3.1132	4.09433	1021.18	357.425
27	AlVO3	-2.83427	1.729	4.18026	2	200.081	5.03605	5.05276	7.86299	90.1503	89.9836	89.992	20	12	5.83095	13.2	4.26146	2.6	0.8	25.1842	13.5628	14.08	4.05214	0.88	0.344384	1.0465	0.263484	183.4	41.2582	0.92	0.348712	2.712	0.891637	103.058	46.5239	4.54e-08	7.8e-08	53.2159	91.6802	1348.52	1566.5	656.174	835.828	92.76	75.7382	6.8332	8.95561	1033.48	343.127
28	AlVO3	-2.89849	2.1442	4.5205	62	185.021	5.06389	5.23769	6.97586	89.9998	89.9999	89.9996	20	12	5.83095	13.2	4.26146	2.6	0.8	25.1842	13.5628	14.08	4.05214	0.88	0.344384	1.0465	0.263484	183.4	41.2582	0.92	0.348712	2.712	0.891637	103.058	46.5239	4.54e-08	7.8e-08	53.2159	91.6802	1348.52	1566.5	656.174	835.828	92.76	75.7382	6.8332	8.95561	1033.48	343.127
29	AlVO3	-2.89761	1.0817	3.88327	1	430.765	5.83721	5.87981	13.2192	102.834	102.806	90.0566	40	12	5.83095	13.2	4.26146	2.6	0.8	25.1842	13.5628	14.08	4.05214	0.88	0.344384	1.0465	0.263484	183.4	41.2582	0.92	0.348712	2.712	0.891637	103.058	46.5239	4.54e-08	7.8e-08	53.2159	91.6802	1348.52	1566.5	656.174	835.828	92.76	75.7382	6.8332	8.95561	1033.48	343.127
30	BaCO3	-2.64675	4.1595	3.69811	167	177.217	9.35908	7.62661	7.62661	41.6656	35.4237	35.4237	10	17.2	19.4155	12.8	5.45527	2.8	1.6	39.4672	48.9543	19.106	10.6121	0.93	0.611228	1.114	0.416634	186	59.4273	0.946	0.558627	2.752	0.992762	111.732	49.4511	2.07e-06	3.97e-06	31.6159	54.6373	1342.72	1678.83	992.88	1450.51	92.76	75.7382	25.1332	46.0321	1105.58	313.903
31	BaCeO3	-3.56441	2.308	6.03362	221	89.5662	4.47419	4.47419	4.47419	90	90	90	5	27.6	24.0133	10.8	6.4	4	2.52982	65.0882	60.1278	22.186	8.09046	1.16	0.692387	1.27	0.130231	208.2	71.4378	1.164	0.645526	2.466	1.19512	99.9204	52.5943	2.16e-07	2.93e-07	5.81595	7.428	1209.32	1449.36	446.48	480.19	92.76	75.7382	2.8332	3.29432	995.26	389.278
32	BaCeO3	-3.60355	2.2112	6.15641	74	175.559	6.27356	6.2787	6.2787	60.466	60.0271	60.0271	10	27.6	24.0133	10.8	6.4	4	2.52982	65.0882	60.1278	22.186	8.09046	1.16	0.692387	1.27	0.130231	208.2	71.4378	1.164	0.645526	2.466	1.19512	99.9204	52.5943	2.16e-07	2.93e-07	5.81595	7.428	1209.32	1449.36	446.48	480.19	92.76	75.7382	2.8332	3.29432	995.26	389.278
33	BaCeO3	-3.60203	2.2279	6.15259	167	175.668	6.25849	6.25849	6.25849	60.5953	60.5953	60.5953	10	27.6	24.0133	10.8	6.4	4	2.52982	65.0882	60.1278	22.186	8.09046	1.16	0.692387	1.27	0.130231	208.2	71.4378	1.164	0.645526	2.466	1.19512	99.9204	52.5943	2.16e-07	2.93e-07	5.81595	7.428	1209.32	1449.36	446.48	480.19	92.76	75.7382	2.8332	3.29432	995.26	389.278
34	BaCeO3	-3.60489	2.2207	6.16035	62	350.894	6.28952	6.29316	8.86523	90	90	90	20	27.6	24.0133	10.8	6.4	4	2.52982	65.0882	60.1278	22.186	8.09046	1.16	0.692387	1.27	0.130231	208.2	71.4378	1.164	0.645526	2.466	1.19512	99.9204	52.5943	2.16e-07	2.93e-07	5.81595	7.428	1209.32	1449.36	446.48	480.19	92.76	75.7382	2.8332	3.29432	995.26	389.278
35	BaCrO3	-2.54381	0.0334	5.96384	194	396.471	5.72824	5.72824	13.952	90	90	120	30	20.8	18.659	11.2	6.01332	3.2	1.6	47.4643	47.0446	19.494	10.1241	1.07	0.622575	1.242	0.175317	199.6	63.4558	1.056	0.563333	2.574	1.08822	100.236	52.3741	9.34e-08	1.33e-07	22.4159	36.4627	1071.52	1228.27	668.88	839.572	92.76	75.7382	5.8332	7.92801	1018.96	363.234
36	BaHfO3	-3.80263	3.5309	8.12815	1	74.3255	4.20332	4.20502	4.20511	89.9957	90.0059	90.0018	5	30.4	27.897	10.8	6.4	3.6	1.95959	72.763	70.7291	20.736	8.8433	1.1	0.641093	1.224	0.207133	201.2	64.6696	1.124	0.607473	2.502	1.1561	87.6466	65.4364	1.36e-07	1.67e-07	8.21595	10.1537	1457.92	1884.92	734.08	958.611	92.76	75.7382	6.8332	9.80749	1020.08	362.111
37	BaMnO3	-2.47343	0.8679	5.7201	166	348.741	12.5683	12.5683	12.5683	26.5135	26.5135	26.5135	25	21	18.6976	11.4	5.8515	3.2	1.6	48.0526	47.1159	19.518	10.0951	1.07	0.622575	1.18367	0.2821	199.6	63.4558	1.054	0.56248	2.552	1.10742	87.3764	65.794	3.56e-07	5.58e-07	5.17595	7.08364	949.52	1054.18	536.68	612.575	92.76	75.7382	4.3732	5.34347	1031.84	350.96
38	BaMnO3	-2.47025	0.8081	5.82136	187	411.21	5.75967	5.75971	14.3134	89.9992	90.0003	120.002	30	21	18.6976	11.4	5.8515	3.2	1.6	48.0526	47.1159	19.518	10.0951	1.07	0.622575	1.18367	0.2821	199.6	63.4558	1.054	0.56248	2.552	1.10742	87.3764	65.794	3.56e-07	5.58e-07	5.17595	7.08364	949.52	1054.18	536.68	612.575	92.76	75.7382	4.3732	5.34347	1031.84	350.96
39	BaMnO3	-2.46292	0.7076	5.95751	194	267.875	5.74982	5.74982	9.35604	90	90	120	20	21	18.6976	11.4	5.8515	3.2	1.6	48.0526	47.1159	19.518	10.0951	1.07	0.622575	1.18367	0.2821	199.6	63.4558	1.054	0.56248	2.552	1.10742	87.3764	65.794	3.56e-07	5.58e-07	5.17595	7.08364	949.52	1054.18	536.68	612.575	92.76	75.7382	4.3732	5.34347	1031.84	350.96
40	BaMnO3	-2.47386	0.7428	5.74	194	556.051	5.77249	5.77249	19.2689	90	90	120	40	21	18.6976	11.4	5.8515	3.2	1.6	48.0526	47.1159	19.518	10.0951	1.07	0.622575	1.18367	0.2821	199.6	63.4558	1.054	0.56248	2.552	1.10742	87.3764	65.794	3.56e-07	5.58e-07	5.17595	7.08364	949.52	1054.18	536.68	612.575	92.76	75.7382	4.3732	5.34347	1031.84	350.96
41	BaMnO3	-2.47378	0.8813	5.80743	166	206.098	7.89412	7.89412	7.89412	42.8415	42.8415	42.8415	15	21	18.6976	11.4	5.8515	3.2	1.6	48.0526	47.1159	19.518	10.0951	1.07	0.622575	1.18367	0.2821	199.6	63.4558	1.054	0.56248	2.552	1.10742	87.3764	65.794	3.56e-07	5.58e-07	5.17595	7.08364	949.52	1054.18	536.68	612.575	92.76	75.7382	4.3732	5.34347	1031.84	350.96
42	BaMnO3	-2.47336	1.9181	5.50862	194	144.852	5.79243	5.79243	4.98508	90	90	120	10	21	18.6976	11.4	5.8515	3.2	1.6	48.0526	47.1159	19.518	10.0951	1.07	0.622575	1.18367	0.2821	199.6	63.4558	1.054	0.56248	2.552	1.10742	87.3764	65.794	3.56e-07	5.58e-07	5.17595	7.08364	949.52	1054.18	536.68	612.575	92.76	75.7382	4.3732	5.34347	1031.84	350.96
43	BaMnO3	-2.48106	2.09	5.41906	185	441.737	10.0546	10.0546	5.04546	90	90	120	30	21	18.6976	11.4	5.8515	3.2	1.6	48.0526	47.1159	19.518	10.0951	1.07	0.622575	1.18367	0.2821	199.6	63.4558	1.054	0.56248	2.552	1.10742	87.3764	65.794	3.56e-07	5.58e-07	5.17595	7.08364	949.52	1054.18	536.68	612.575	92.76	75.7382	4.3732	5.34347	1031.84	350.96
44	BaMnO3	-2.46292	0.6737	5.91954	194	269.593	5.74633	5.74633	9.4275	90	90	120	20	21	18.6976	11.4	5.8515	3.2	1.6	48.0526	47.1159	19.518	10.0951	1.07	0.622575	1.18367	0.2821	199.6	63.4558	1.054	0.56248	2.552	1.10742	87.3764	65.794	3.56e-07	5.58e-07	5.17595	7.08364	949.52	1054.18	536.68	612.575	92.76	75.7382	4.3732	5.34347	1031.84	350.96
45	BaNiO3	-1.74039	1.4692	5.93364	194	136.578	5.71772	5.71772	4.82396	90	90	120	10	21.6	18.8637	12	5.51362	3.2	1.6	48.8037	47.2494	19.366	10.2812	1.06	0.617576	1.202	0.24758	198.6	62.7681	1.03	0.554401	2.624	1.05015	109.684	49.2041	8.24e-08	1.32e-07	21.8159	35.2855	1119.92	1303.56	578.48	681.439	92.76	75.7382	5.1732	6.72574	1035.8	347.483
46	BaNiO3	-1.74051	1.4755	5.91957	186	136.903	5.7226	5.7226	4.82718	90	90	120	10	21.6	18.8637	12	5.51362	3.2	1.6	48.8037	47.2494	19.366	10.2812	1.06	0.617576	1.202	0.24758	198.6	62.7681	1.03	0.554401	2.624	1.05015	109.684	49.2041	8.24e-08	1.32e-07	21.8159	35.2855	1119.92	1303.56	578.48	681.439	92.76	75.7382	5.1732	6.72574	1035.8	347.483
47	BaPbO3	-2.12237	0.1925	7.87718	12	165.492	6.13111	6.15037	6.15037	89.7504	60.2337	60.2337	10	32.4	30.9942	12.8	5.45527	3.6	1.95959	78.505	79.6785	21.7	8.23738	1.15	0.682642	1.2785	0.118402	201.4	64.8309	1.086	0.579296	2.708	1.00553	94.4006	57.4344	1.1e-07	1.41e-07	10.6159	14.0393	887.12	976.773	353.002	386.443	92.76	75.7382	2.6872	3.18734	1031.5	351.266
48	BaPbO3	-2.11949	0.0266	7.90442	140	164.921	6.1007	6.1007	6.18421	119.554	119.554	90	10	32.4	30.9942	12.8	5.45527	3.6	1.95959	78.505	79.6785	21.7	8.23738	1.15	0.682642	1.2785	0.118402	201.4	64.8309	1.086	0.579296	2.708	1.00553	94.4006	57.4344	1.1e-07	1.41e-07	10.6159	14.0393	887.12	976.773	353.002	386.443	92.76	75.7382	2.6872	3.18734	1031.5	351.266
49	BaPbO3	-2.12233	0.3054	7.87898	74	165.454	6.13386	6.21655	6.15582	120.323	119.885	90.0003	10	32.4	30.9942	12.8	5.45527	3.6	1.95959	78.505	79.6785	21.7	8.23738	1.15	0.682642	1.2785	0.118402	201.4	64.8309	1.086	0.579296	2.708	1.00553	94.4006	57.4344	1.1e-07	1.41e-07	10.6159	14.0393	887.12	976.773	353.002	386.443	92.76	75.7382	2.6872	3.18734	1031.5	351.266
50	BaPuO3	-3.4273	0.0161	8.41076	62	339.047	6.2022	6.23904	8.76187	90	90	90	20	34.8	34.9537	11.6	5.71314	4.2	2.85657	85.865	91.9768	20.506	9.04277	1.14	0.67335	1.2475	0.165937	150.6	95.8198	1.156	0.637294	2.498	1.16028	87.3764	65.794	3.68e-07	5.81e-07	4.81595	6.98621	1183.32	1406.17	415.38	442.484	92.76	75.7382	2.2932	3.02305	1005.32	377.716
51	BaSiO3	-3.00969	2.1249	6.07118	194	350.222	5.51827	5.51827	13.2803	90	90	120	30	18.8	18.7446	12.8	5.45527	3	1.54919	42.6821	47.5534	20.46	9.08493	1.01	0.601997	1.162	0.323506	194.4	60.5197	1.024	0.553014	2.622	1.05152	113.99	50.1117	0.000200068	0.000399966	33.6159	58.6069	1117.32	1299.44	570.28	667.665	92.76	75.7382	11.7732	19.4481	1045.68	339.46
52	BaSiO3	-2.8567	0.9385	6.27352	221	56.4877	3.83694	3.83694	3.83694	90	90	90	5	18.8	18.7446	12.8	5.45527	3	1.54919	42.6821	47.5534	20.46	9.08493	1.01	0.601997	1.162	0.323506	194.4	60.5197	1.024	0.553014	2.622	1.05152	113.99	50.1117	0.000200068	0.000399966	33.6159	58.6069	1117.32	1299.44	570.28	667.665	92.76	75.7382	11.7732	19.4481	1045.68	339.46
53	BaSiO3	-3.12388	3.0377	5.76523	166	184.404	7.47929	7.47929	7.47929	44.1468	44.1468	44.1468	15	18.8	18.7446	12.8	5.45527	3	1.54919	42.6821	47.5534	20.46	9.08493	1.01	0.601997	1.162	0.323506	194.4	60.5197	1.024	0.553014	2.622	1.05152	113.99	50.1117	0.000200068	0.000399966	33.6159	58.6069	1117.32	1299.44	570.28	667.665	92.76	75.7382	11.7732	19.4481	1045.68	339.46
54	BaSnO3	-2.60203	0.3724	6.86998	221	73.4881	4.18863	4.18863	4.18863	90	90	90	5	26	22.1269	12.8	5.45527	3.4	1.74356	60.807	55.1928	21.306	8.43718	1.08	0.628172	1.22	0.214383	199	63.0365	1.076	0.573327	2.634	1.04352	108.836	49.2014	9.1e-08	1.32e-07	17.0159	25.9434	1057.72	1207.36	333.896	375.947	92.76	75.7382	3.1332	3.57947	1030.1	352.533
55	BaTcO3	-2.47884	0.2862	6.65806	194	423.972	5.83748	5.83748	14.3667	90	90	120	30	24.6	20.7422	11.4	5.8515	3.4	1.74356	56.665	51.3342	19.774	9.79506	1.06	0.617576	1.20233	0.246958	199.4	63.3138	1.072	0.571118	2.622	1.05152	97.9904	54.08	1.12e-07	1.42e-07	13.8159	19.8525	1390.32	1763.26	718.88	930.588	92.76	75.7382	6.3332	8.86116	1028.78	353.745
56	BaThO3	-3.70711	3.2009	7.11962	221	97.3433	4.60012	4.60012	4.60012	90	90	90	5	34	33.6095	10.8	6.4	4.2	2.85657	83.4727	87.8975	22.008	8.1311	1.15	0.682642	1.27	0.130231	211.6	75.4469	1.176	0.65841	2.502	1.1561	87.3764	65.794	9.8e-08	1.34e-07	14.4159	20.9805	1501.32	1963.96	655.88	816.253	92.76	75.7382	4.9332	6.30025	1005.78	377.205
57	BaTiO3	-3.49884	1.727	5.68151	194	408.932	5.78756	5.78756	14.0971	90	90	120	30	20.4	18.6075	10.8	6.4	3.2	1.6	46.6384	46.994	20.176	9.36108	1.07	0.622575	1.22433	0.206531	199.8	63.6	1.092	0.583178	2.55	1.10923	88.8964	63.8159	1.48e-07	1.82e-07	8.01595	9.86636	1194.72	1425.04	621.08	754.69	92.76	75.7382	5.4732	7.26716	1020.14	362.051
58	BaTiO3	-3.50366	2.3004	5.61582	20	413.715	5.79788	5.79788	14.1421	90	90	119.511	30	20.4	18.6075	10.8	6.4	3.2	1.6	46.6384	46.994	20.176	9.36108	1.07	0.622575	1.22433	0.206531	199.8	63.6	1.092	0.583178	2.55	1.10923	88.8964	63.8159	1.48e-07	1.82e-07	8.01595	9.86636	1194.72	1425.04	621.08	754.69	92.76	75.7382	5.4732	7.26716	1020.14	362.051
59	BaTiO3	-3.50639	2.293	5.71338	38	67.7751	3.98753	4.12279	4.12279	90.4882	90	90	5	20.4	18.6075	10.8	6.4	3.2	1.6	46.6384	46.994	20.176	9.36108	1.07	0.622575	1.22433	0.206531	199.8	63.6	1.092	0.583178	2.55	1.10923	88.8964	63.8159	1.48e-07	1.82e-07	8.01595	9.86636	1194.72	1425.04	621.08	754.69	92.76	75.7382	5.4732	7.26716	1020.14	362.051
60	BaTiO3	-3.50691	2.5441	5.69697	160	67.9703	4.08113	4.08113	4.08113	89.6646	89.6646	89.6646	5	20.4	18.6075	10.8	6.4	3.2	1.6	46.6384	46.994	20.176	9.36108	1.07	0.622575	1.22433	0.206531	199.8	63.6	1.092	0.583178	2.55	1.10923	88.8964	63.8159	1.48e-07	1.82e-07	8.01595	9.86636	1194.72	1425.04	621.08	754.69	92.76	75.7382	5.4732	7.26716	1020.14	362.051
61	BaTiO3	-3.50391	1.7228	5.73532	99	67.5158	4.00201	4.00201	4.21551	90	90	90	5	20.4	18.6075	10.8	6.4	3.2	1.6	46.6384	46.994	20.176	9.36108	1.07	0.622575	1.22433	0.206531	199.8	63.6	1.092	0.583178	2.55	1.10923	88.8964	63.8159	1.48e-07	1.82e-07	8.01595	9.86636	1194.72	1425.04	621.08	754.69	92.76	75.7382	5.4732	7.26716	1020.14	362.051
62	BaTiO3	-3.4924	1.667	5.88791	123	131.532	5.70318	5.70318	5.71105	119.954	119.954	90	10	20.4	18.6075	10.8	6.4	3.2	1.6	46.6384	46.994	20.176	9.36108	1.07	0.622575	1.22433	0.206531	199.8	63.6	1.092	0.583178	2.55	1.10923	88.8964	63.8159	1.48e-07	1.82e-07	8.01595	9.86636	1194.72	1425.04	621.08	754.69	92.76	75.7382	5.4732	7.26716	1020.14	362.051
63	BaZrO3	-3.65468	3.0368	5.95816	221	77.0743	4.25569	4.25569	4.25569	90	90	90	5	24	20.2386	10.8	6.4	3.4	1.74356	55.3098	50.3042	20.852	8.75015	1.1	0.641093	1.226	0.203529	201	64.5105	1.124	0.607473	2.508	1.14991	95.597	56.2369	1.55e-07	1.92e-07	8.21595	10.1537	1419.12	1814.85	658.48	820.904	92.76	75.7382	5.9332	8.11337	1016.38	365.862
64	BaZrO3	-3.65438	3.1193	5.98332	140	153.5	5.99657	6.0168	5.99657	119.889	90	119.889	10	24	20.2386	10.8	6.4	3.4	1.74356	55.3098	50.3042	20.852	8.75015	1.1	0.641093	1.226	0.203529	201	64.5105	1.124	0.607473	2.508	1.14991	95.597	56.2369	1.55e-07	1.92e-07	8.21595	10.1537	1419.12	1814.85	658.48	820.904	92.76	75.7382	5.9332	8.11337	1016.38	365.862
65	BiRhO3	-1.36048	0.4076	9.49899	62	251.649	5.44007	5.92128	7.81221	90	90	90	20	30.4	29.9506	14.4	2.72764	3.4	1.74356	71.9768	76.3243	16.334	4.3078	0.95	0.43589	1.112	0.20314	194.8	56.0371	0.952	0.385456	2.924	0.637294	124.711	20.7866	2.69e-07	5.16e-07	31.6159	59.2725	1215.12	1533.72	589.16	845.459	92.76	75.7382	6.6532	8.58513	1072.34	294.794
66	CaCO3	-2.69208	4.9539	2.60189	5	191.628	5.01008	5.04084	8.74458	90.6455	90	119.798	15	10	5.05964	12.8	5.45527	2.4	0.8	20.0174	10.1486	16.714	6.65949	0.86	0.471593	1.044	0.374892	177.8	43.3793	0.882	0.43111	2.774	0.951622	109.415	54.0365	2.01e-06	4e-06	68.0159	85.4039	1265.52	1648.86	1015.88	1451.36	92.76	75.7382	25.2412	45.9924	1122.96	280.703
67	CaCO3	-2.69946	4.9995	2.60792	167	127.456	5.05131	5.05131	6.46333	66.9977	66.9977	60	10	10	5.05964	12.8	5.45527	2.4	0.8	20.0174	10.1486	16.714	6.65949	0.86	0.471593	1.044	0.374892	177.8	43.3793	0.882	0.43111	2.774	0.951622	109.415	54.0365	2.01e-06	4e-06	68.0159	85.4039	1265.52	1648.86	1015.88	1451.36	92.76	75.7382	25.2412	45.9924	1122.96	280.703
68	CaCeO3	-3.63253	2.3373	5.02869	62	301.408	5.84072	6.06215	8.5126	90	90	90	20	20.4	19.3659	10.8	6.4	3.6	2.33238	45.6384	48.1505	19.794	3.4529	1.09	0.600333	1.2	0.0758947	200	61.7867	1.1	0.564269	2.488	1.16657	97.6036	56.4443	1.55e-07	2.93e-07	42.2159	79.0064	1132.12	1407.24	469.48	508.095	92.76	75.7382	2.9412	3.4663	1012.64	368.281
69	CaCrO3	-2.62228	0.632	4.22706	62	220.101	5.33206	5.47606	7.53806	90	90	90	20	13.6	6.97424	11.2	6.01332	2.8	0.979796	28.0145	15.1903	17.102	6.00716	1	0.505964	1.172	0.124964	191.4	50.9886	0.992	0.453008	2.596	1.05454	97.9196	56.2522	3.22e-08	4.92e-08	58.8159	79.4222	994.32	1169.21	691.88	849.841	92.76	75.7382	5.9412	7.9604	1036.34	339.425
70	CaCrO3	-2.62228	0.6157	4.24812	62	219.01	5.31963	5.44218	7.56503	89.9977	90.0009	90.0002	20	13.6	6.97424	11.2	6.01332	2.8	0.979796	28.0145	15.1903	17.102	6.00716	1	0.505964	1.172	0.124964	191.4	50.9886	0.992	0.453008	2.596	1.05454	97.9196	56.2522	3.22e-08	4.92e-08	58.8159	79.4222	994.32	1169.21	691.88	849.841	92.76	75.7382	5.9412	7.9604	1036.34	339.425
71	CaGeO3	-2.65486	2.0247	4.93238	62	216.427	5.33181	5.37445	7.55271	90	90	90	20	15.2	9.6	12.8	5.45527	2.8	0.979796	32.1432	22.2927	18.382	4.1674	0.97	0.485386	1.138	0.189779	188.2	47.935	0.972	0.441017	2.666	1.00031	108.847	53.9185	0.000100007	0.000199997	52.0159	77.5522	1024.12	1219.34	498.16	543.858	92.76	75.7382	8.2012	12.2313	1058.16	316.829
72	CaGeO3	-2.76257	3.4744	3.55703	2	450.166	7.38223	7.63253	8.2503	103.501	95.008	90.1442	30	15.2	9.6	12.8	5.45527	2.8	0.979796	32.1432	22.2927	18.382	4.1674	0.97	0.485386	1.138	0.189779	188.2	47.935	0.972	0.441017	2.666	1.00031	108.847	53.9185	0.000100007	0.000199997	52.0159	77.5522	1024.12	1219.34	498.16	543.858	92.76	75.7382	8.2012	12.2313	1058.16	316.829
73	CaGeO3	-2.74791	2.5121	4.24556	88	1005.76	10.9325	10.9325	10.9325	109.139	109.139	110.137	80	15.2	9.6	12.8	5.45527	2.8	0.979796	32.1432	22.2927	18.382	4.1674	0.97	0.485386	1.138	0.189779	188.2	47.935	0.972	0.441017	2.666	1.00031	108.847	53.9185	0.000100007	0.000199997	52.0159	77.5522	1024.12	1219.34	498.16	543.858	92.76	75.7382	8.2012	12.2313	1058.16	316.829
74	CaGeO3	-2.7417	3.3911	3.82552	2	418.571	6.95097	9.56674	6.89402	84.0584	76.4369	69.9729	30	15.2	9.6	12.8	5.45527	2.8	0.979796	32.1432	22.2927	18.382	4.1674	0.97	0.485386	1.138	0.189779	188.2	47.935	0.972	0.441017	2.666	1.00031	108.847	53.9185	0.000100007	0.000199997	52.0159	77.5522	1024.12	1219.34	498.16	543.858	92.76	75.7382	8.2012	12.2313	1058.16	316.829
75	CaGeO3	-2.59166	0.5054	4.92854	221	54.149	3.78324	3.78324	3.78324	90	90	90	5	15.2	9.6	12.8	5.45527	2.8	0.979796	32.1432	22.2927	18.382	4.1674	0.97	0.485386	1.138	0.189779	188.2	47.935	0.972	0.441017	2.666	1.00031	108.847	53.9185	0.000100007	0.000199997	52.0159	77.5522	1024.12	1219.34	498.16	543.858	92.76	75.7382	8.2012	12.2313	1058.16	316.829
76	CaHfO3	-3.83487	4.4855	6.86069	62	258.075	5.5808	5.76823	8.01691	90	90	90	20	23.2	24.8387	10.8	6.4	3.2	1.6	53.3132	63.2793	18.344	4.21119	1.03	0.532541	1.154	0.158947	193	52.7409	1.06	0.515364	2.524	1.12587	85.3298	68.1532	7.48e-08	1.33e-07	44.6159	78.1999	1380.72	1863.06	757.08	966.066	92.76	75.7382	6.9412	9.82271	1037.46	338.165
77	CaHfO3	-3.6805	3.6644	6.39858	221	69.1784	4.1051	4.1051	4.1051	90	90	90	5	23.2	24.8387	10.8	6.4	3.2	1.6	53.3132	63.2793	18.344	4.21119	1.03	0.532541	1.154	0.158947	193	52.7409	1.06	0.515364	2.524	1.12587	85.3298	68.1532	7.48e-08	1.33e-07	44.6159	78.1999	1380.72	1863.06	757.08	966.066	92.76	75.7382	6.9412	9.82271	1037.46	338.165
78	CaMnO3	-2.50579	0.54	4.36505	62	217.62	5.3258	5.40497	7.55999	90	90	90	20	13.8	7.27736	11.4	5.8515	2.8	0.979796	28.6028	16.1354	17.126	5.96778	1	0.505964	1.11367	0.237263	191.4	50.9886	0.99	0.451664	2.574	1.07479	85.0596	68.4874	2.95e-07	5.73e-07	41.5759	79.2692	872.32	975.121	559.68	631.409	92.76	75.7382	4.4812	5.42058	1049.22	325.569
79	CaMnO3	-2.50579	0.5402	4.34808	62	218.469	5.33409	5.41102	7.56922	90	90	90	20	13.8	7.27736	11.4	5.8515	2.8	0.979796	28.6028	16.1354	17.126	5.96778	1	0.505964	1.11367	0.237263	191.4	50.9886	0.99	0.451664	2.574	1.07479	85.0596	68.4874	2.95e-07	5.73e-07	41.5759	79.2692	872.32	975.121	559.68	631.409	92.76	75.7382	4.4812	5.42058	1049.22	325.569
80	CaMoO3	-2.69437	1.3221	4.86063	14	251.462	5.53291	5.74761	7.9078	90.5957	90.0239	89.9663	20	17.2	13.2424	11.2	6.01332	3	1.26491	36.8032	31.0041	17.532	5.32312	1.01	0.514198	1.139	0.18784	191.4	50.9886	1.024	0.478565	2.696	0.982275	99.4938	55.3929	1.78e-08	2.28e-08	67.8159	85.2361	1387.92	1876.57	835.08	1109.26	92.76	75.7382	9.0412	13.859	1042.62	332.492
81	CaMoO3	-2.68745	1.1542	4.85596	62	251.704	5.52575	5.70339	7.98667	90	90	90	20	17.2	13.2424	11.2	6.01332	3	1.26491	36.8032	31.0041	17.532	5.32312	1.01	0.514198	1.139	0.18784	191.4	50.9886	1.024	0.478565	2.696	0.982275	99.4938	55.3929	1.78e-08	2.28e-08	67.8159	85.2361	1387.92	1876.57	835.08	1109.26	92.76	75.7382	9.0412	13.859	1042.62	332.492
82	CaMoO3	-2.68442	1.0948	4.85226	2	251.896	5.50477	5.73032	7.98622	90.197	89.8901	90.7272	20	17.2	13.2424	11.2	6.01332	3	1.26491	36.8032	31.0041	17.532	5.32312	1.01	0.514198	1.139	0.18784	191.4	50.9886	1.024	0.478565	2.696	0.982275	99.4938	55.3929	1.78e-08	2.28e-08	67.8159	85.2361	1387.92	1876.57	835.08	1109.26	92.76	75.7382	9.0412	13.859	1042.62	332.492
83	CaNiO3	-1.60607	0.2959	4.44514	62	219.311	5.36656	5.41036	7.55331	89.9987	90	89.9998	20	14.4	8.2365	12	5.51362	2.8	0.979796	29.3539	17.383	16.974	6.21922	0.99	0.498397	1.132	0.201435	190.4	49.9664	0.966	0.438068	2.646	1.01413	107.367	53.7223	2.12e-08	2.86e-08	58.2159	79.165	1042.72	1251.06	601.48	697.04	92.76	75.7382	5.2812	6.77442	1053.18	321.604
84	CaNiO3	-1.67289	1.1857	4.35479	186	111.93	5.19503	5.19501	4.78897	89.9993	90	120	10	14.4	8.2365	12	5.51362	2.8	0.979796	29.3539	17.383	16.974	6.21922	0.99	0.498397	1.132	0.201435	190.4	49.9664	0.966	0.438068	2.646	1.01413	107.367	53.7223	2.12e-08	2.86e-08	58.2159	79.165	1042.72	1251.06	601.48	697.04	92.76	75.7382	5.2812	6.77442	1053.18	321.604
85	CaPbO3	-2.18444	0.9332	6.87939	62	285.094	5.76038	5.98178	8.27381	90	90	90	20	25.2	28.7778	12.8	5.45527	3.2	1.6	59.0552	74.6571	19.308	3.46358	1.08	0.587878	1.2085	0.0633167	193.2	52.9694	1.022	0.476756	2.73	0.96594	92.0838	60.7695	4.88e-08	8.17e-08	47.0159	77.6821	809.92	885.448	376.002	425.694	92.76	75.7382	2.7952	3.36947	1048.88	325.917
86	CaPtO3	-2.00089	1.2796	7.91813	63	118.765	3.1901	5.24948	7.44394	90	90	107.689	10	24.4	27.2	12	5.51362	3.2	1.6	56.632	69.8513	17.474	5.41246	0.99	0.498397	1.145	0.176238	188.8	48.4578	0.992	0.453008	2.72	0.970278	126.124	66.7068	2.8e-08	4.12e-08	54.4159	77.9468	1225.12	1574.83	664.16	801.749	92.76	75.7382	5.8412	7.77794	1079.76	299.086
87	CaSeO3	-2.30528	4.1407	3.70515	62	299.443	5.4607	6.49213	8.44654	90	90	90	20	15.6	10.3073	13.2	5.6	2.8	0.979796	33.4072	24.6116	18.94	3.64821	0.95	0.475395	1.18667	0.0983418	178.8	43.4069	0.968	0.439017	2.774	0.951622	124.053	64.3342	8.8e-09	1.32e-08	40.1199	79.9403	597.12	670.292	354.68	416.481	445.96	662.73	2.9212	3.45174	1093.96	290.348
88	CaSiO3	-3.46086	4.8811	2.81893	14	821.124	7.15141	7.3929	15.6086	90	95.7131	90	60	11.6	4.8	12.8	5.45527	2.6	0.8	23.2323	9.63614	18.068	4.55476	0.94	0.471593	1.092	0.279886	186.2	46.3741	0.96	0.435431	2.644	1.01559	111.673	54.7374	0.000200007	0.000399997	70.0159	87.1652	1040.12	1246.61	593.28	683.856	92.76	75.7382	11.8812	19.4284	1063.06	312.369
89	CaSiO3	-3.21915	3.6753	4.10438	74	187.986	5.10401	5.12261	7.18988	90	90	90	20	11.6	4.8	12.8	5.45527	2.6	0.8	23.2323	9.63614	18.068	4.55476	0.94	0.471593	1.092	0.279886	186.2	46.3741	0.96	0.435431	2.644	1.01559	111.673	54.7374	0.000200007	0.000399997	70.0159	87.1652	1040.12	1246.61	593.28	683.856	92.76	75.7382	11.8812	19.4284	1063.06	312.369
90	CaSiO3	-3.21611	3.4515	4.10701	221	46.9663	3.60796	3.60796	3.60796	90	90	90	5	11.6	4.8	12.8	5.45527	2.6	0.8	23.2323	9.63614	18.068	4.55476	0.94	0.471593	1.092	0.279886	186.2	46.3741	0.96	0.435431	2.644	1.01559	111.673	54.7374	0.000200007	0.000399997	70.0159	87.1652	1040.12	1246.61	593.28	683.856	92.76	75.7382	11.8812	19.4284	1063.06	312.369
91	CaSiO3	-3.21946	3.712	4.1023	62	188.081	5.10169	5.11575	7.20645	90	90	90	20	11.6	4.8	12.8	5.45527	2.6	0.8	23.2323	9.63614	18.068	4.55476	0.94	0.471593	1.092	0.279886	186.2	46.3741	0.96	0.435431	2.644	1.01559	111.673	54.7374	0.000200007	0.000399997	70.0159	87.1652	1040.12	1246.61	593.28	683.856	92.76	75.7382	11.8812	19.4284	1063.06	312.369
92	CaSiO3	-3.21665	3.5088	4.10699	139	187.866	6.24919	6.24919	6.24919	109.403	109.403	109.607	20	11.6	4.8	12.8	5.45527	2.6	0.8	23.2323	9.63614	18.068	4.55476	0.94	0.471593	1.092	0.279886	186.2	46.3741	0.96	0.435431	2.644	1.01559	111.673	54.7374	0.000200007	0.000399997	70.0159	87.1652	1040.12	1246.61	593.28	683.856	92.76	75.7382	11.8812	19.4284	1063.06	312.369
93	CaSiO3	-3.21659	3.5279	4.1043	204	187.989	6.25055	6.25055	6.25055	109.471	109.471	109.471	20	11.6	4.8	12.8	5.45527	2.6	0.8	23.2323	9.63614	18.068	4.55476	0.94	0.471593	1.092	0.279886	186.2	46.3741	0.96	0.435431	2.644	1.01559	111.673	54.7374	0.000200007	0.000399997	70.0159	87.1652	1040.12	1246.61	593.28	683.856	92.76	75.7382	11.8812	19.4284	1063.06	312.369
94	CaSiO3	-3.46083	4.8369	2.81892	2	410.564	7.15108	7.39278	8.02477	103.452	95.52	90.0805	30	11.6	4.8	12.8	5.45527	2.6	0.8	23.2323	9.63614	18.068	4.55476	0.94	0.471593	1.092	0.279886	186.2	46.3741	0.96	0.435431	2.644	1.01559	111.673	54.7374	0.000200007	0.000399997	70.0159	87.1652	1040.12	1246.61	593.28	683.856	92.76	75.7382	11.8812	19.4284	1063.06	312.369
95	CaSiO3	-3.21932	3.6538	4.10617	140	375.807	7.1822	7.1822	7.28534	90	90	90	40	11.6	4.8	12.8	5.45527	2.6	0.8	23.2323	9.63614	18.068	4.55476	0.94	0.471593	1.092	0.279886	186.2	46.3741	0.96	0.435431	2.644	1.01559	111.673	54.7374	0.000200007	0.000399997	70.0159	87.1652	1040.12	1246.61	593.28	683.856	92.76	75.7382	11.8812	19.4284	1063.06	312.369
96	CaSiO3	-3.21657	3.5146	4.10379	127	94.0064	3.62419	5.09299	5.09299	90	90	90	10	11.6	4.8	12.8	5.45527	2.6	0.8	23.2323	9.63614	18.068	4.55476	0.94	0.471593	1.092	0.279886	186.2	46.3741	0.96	0.435431	2.644	1.01559	111.673	54.7374	0.000200007	0.000399997	70.0159	87.1652	1040.12	1246.61	593.28	683.856	92.76	75.7382	11.8812	19.4284	1063.06	312.369
97	CaSnO3	-2.49747	1.3905	5.10661	221	134.483	5.75079	5.75079	5.75079	60	60	60	10	18.8	16.2776	12.8	5.45527	3	1.26491	41.3572	39.7848	18.914	3.66649	1.01	0.514198	1.15	0.166613	190.8	50.3682	1.012	0.46812	2.656	1.00705	106.519	53.6833	2.98e-08	4.46e-08	53.4159	77.7466	980.52	1146.3	356.896	417.245	92.76	75.7382	3.2412	3.72968	1047.48	327.357
98	CaSnO3	-2.69245	2.9435	4.95035	148	138.728	6.08189	6.08189	6.08189	54.5135	54.5135	54.5135	10	18.8	16.2776	12.8	5.45527	3	1.26491	41.3572	39.7848	18.914	3.66649	1.01	0.514198	1.15	0.166613	190.8	50.3682	1.012	0.46812	2.656	1.00705	106.519	53.6833	2.98e-08	4.46e-08	53.4159	77.7466	980.52	1146.3	356.896	417.245	92.76	75.7382	3.2412	3.72968	1047.48	327.357
99	CaSnO3	-2.67826	2.3301	5.34138	62	257.144	5.58311	5.75622	8.00136	90	90	90	20	18.8	16.2776	12.8	5.45527	3	1.26491	41.3572	39.7848	18.914	3.66649	1.01	0.514198	1.15	0.166613	190.8	50.3682	1.012	0.46812	2.656	1.00705	106.519	53.6833	2.98e-08	4.46e-08	53.4159	77.7466	980.52	1146.3	356.896	417.245	92.76	75.7382	3.2412	3.72968	1047.48	327.357
100	CaTeO3	-2.42187	2.9142	4.24692	78	1686.58	11.1977	12.2727	12.2727	90	90	90	100	19.2	17.0458	13.2	5.6	3	1.26491	43.1352	43.2497	19.748	3.44218	1	0.505964	1.24267	0.0529318	182.2	44.1833	1.006	0.463275	2.684	0.989093	123.092	63.2954	2e-05	4e-05	40.6159	79.7003	657.72	712.545	400.412	441.095	92.76	75.7382	5.3412	6.88022	1079.62	299.184
101	CaTiO3	-3.56905	2.3238	3.94046	62	458.299	7.71855	7.69401	7.7185	90	88.9537	90	40	13.2	6.4	10.8	6.4	2.8	0.979796	27.1886	13.9236	17.784	4.94783	1	0.505964	1.15433	0.158309	191.6	51.2	1.028	0.482261	2.572	1.07671	86.5796	66.6422	8.68e-08	1.57e-07	44.4159	78.2561	1117.52	1381.36	644.08	767.531	92.76	75.7382	5.5812	7.30781	1037.52	338.098
102	CaTiO3	-3.55054	2.2434	3.92455	140	115.04	5.41716	5.41716	5.48092	119.616	119.616	90	10	13.2	6.4	10.8	6.4	2.8	0.979796	27.1886	13.9236	17.784	4.94783	1	0.505964	1.15433	0.158309	191.6	51.2	1.028	0.482261	2.572	1.07671	86.5796	66.6422	8.68e-08	1.57e-07	44.4159	78.2561	1117.52	1381.36	644.08	767.531	92.76	75.7382	5.5812	7.30781	1037.52	338.098
103	CaTiO3	-3.54015	3.5706	3.6129	148	124.963	5.34117	5.92336	5.34086	116.783	60.0074	116.796	10	13.2	6.4	10.8	6.4	2.8	0.979796	27.1886	13.9236	17.784	4.94783	1	0.505964	1.15433	0.158309	191.6	51.2	1.028	0.482261	2.572	1.07671	86.5796	66.6422	8.68e-08	1.57e-07	44.4159	78.2561	1117.52	1381.36	644.08	767.531	92.76	75.7382	5.5812	7.30781	1037.52	338.098
104	CaTiO3	-3.55799	2.4775	3.92502	74	230.051	5.47597	5.47655	7.67108	90	90	90	20	13.2	6.4	10.8	6.4	2.8	0.979796	27.1886	13.9236	17.784	4.94783	1	0.505964	1.15433	0.158309	191.6	51.2	1.028	0.482261	2.572	1.07671	86.5796	66.6422	8.68e-08	1.57e-07	44.4159	78.2561	1117.52	1381.36	644.08	767.531	92.76	75.7382	5.5812	7.30781	1037.52	338.098
105	CaTiO3	-3.50474	1.8283	3.8365	221	58.8399	3.88947	3.88947	3.88947	90	90	90	5	13.2	6.4	10.8	6.4	2.8	0.979796	27.1886	13.9236	17.784	4.94783	1	0.505964	1.15433	0.158309	191.6	51.2	1.028	0.482261	2.572	1.07671	86.5796	66.6422	8.68e-08	1.57e-07	44.4159	78.2561	1117.52	1381.36	644.08	767.531	92.76	75.7382	5.5812	7.30781	1037.52	338.098
106	CaVO3	-2.93684	0.5509	4.10788	2	224.782	5.38145	5.43759	7.68254	89.5456	89.7404	90.6927	20	13.4	6.68132	11	6.19677	2.8	0.979796	27.8035	14.8596	17.32	5.65436	0.99	0.498397	1.1395	0.186872	190.8	50.3682	1.02	0.474974	2.59	1.05992	95.1796	58.1255	4.68e-08	7.77e-08	46.2159	77.8221	1141.52	1423.97	692.48	850.891	92.76	75.7382	6.4012	8.80957	1035.94	339.877
107	CaVO3	-2.93473	0.5302	4.10256	62	225.074	5.46468	5.33834	7.71531	90	90	90	20	13.4	6.68132	11	6.19677	2.8	0.979796	27.8035	14.8596	17.32	5.65436	0.99	0.498397	1.1395	0.186872	190.8	50.3682	1.02	0.474974	2.59	1.05992	95.1796	58.1255	4.68e-08	7.77e-08	46.2159	77.8221	1141.52	1423.97	692.48	850.891	92.76	75.7382	6.4012	8.80957	1035.94	339.877
108	CaWO3	-2.61558	2.3161	7.06117	2	255.78	5.58087	5.79424	7.91017	89.5021	89.9978	90.0935	20	23.6	25.625	11.2	6.01332	3.2	1.6	54.3832	65.3967	17.55	5.29561	0.99	0.498397	1.13733	0.191072	192.2	51.8475	1.032	0.486062	2.736	0.963527	100.811	54.8027	1.76e-08	2.25e-08	74.0159	91.1133	1571.12	2224.18	994.88	1411.12	92.76	75.7382	8.8412	13.4703	1059.76	315.346
109	CaWO3	-2.43944	0.404	6.52025	1	69.25	4.09738	5.95954	4.12868	91.5139	88.9575	136.596	5	23.6	25.625	11.2	6.01332	3.2	1.6	54.3832	65.3967	17.55	5.29561	0.99	0.498397	1.13733	0.191072	192.2	51.8475	1.032	0.486062	2.736	0.963527	100.811	54.8027	1.76e-08	2.25e-08	74.0159	91.1133	1571.12	2224.18	994.88	1411.12	92.76	75.7382	8.8412	13.4703	1059.76	315.346
110	CaZrO3	-3.65812	3.4707	4.38825	32	542.786	5.83184	11.4571	8.1236	90	90	90	40	16.8	12.4964	10.8	6.4	3	1.26491	35.86	29.2106	18.46	4.08047	1.03	0.532541	1.156	0.155126	192.8	52.5144	1.06	0.515364	2.53	1.11939	93.2802	59.6855	9.34e-08	1.7e-07	44.6159	78.1999	1341.92	1790.47	681.48	831.69	92.76	75.7382	6.0412	8.1437	1033.76	342.366
111	CaZrO3	-3.49129	3.2155	4.1355	221	71.995	4.16007	4.16007	4.16007	90	90	90	5	16.8	12.4964	10.8	6.4	3	1.26491	35.86	29.2106	18.46	4.08047	1.03	0.532541	1.156	0.155126	192.8	52.5144	1.06	0.515364	2.53	1.11939	93.2802	59.6855	9.34e-08	1.7e-07	44.6159	78.1999	1341.92	1790.47	681.48	831.69	92.76	75.7382	6.0412	8.1437	1033.76	342.366
112	CaZrO3	-3.68352	3.8263	4.46654	62	266.636	5.63837	5.83323	8.10692	90	90	90	20	16.8	12.4964	10.8	6.4	3	1.26491	35.86	29.2106	18.46	4.08047	1.03	0.532541	1.156	0.155126	192.8	52.5144	1.06	0.515364	2.53	1.11939	93.2802	59.6855	9.34e-08	1.7e-07	44.6159	78.1999	1341.92	1790.47	681.48	831.69	92.76	75.7382	6.0412	8.1437	1033.76	342.366
113	CdCO3	-1.77927	2.6226	4.74461	167	120.689	6.249	6.249	6.249	47.3319	47.3319	47.3319	10	15.6	16.2185	14.8	1.6	2.6	1.2	34.484	38.9941	14.074	4.70543	0.81	0.372022	1.034	0.372859	175.2	38.3531	0.814	0.296081	2.912	0.701524	108.941	54.9756	2.01e-06	3.99e-06	47.4159	59.6115	1122.12	1630.97	911.724	1459.17	92.76	75.7382	24.7932	46.1635	1178.56	178.528
114	CdCoO3	-1.19898	0.1331	6.32552	15	230.322	6.75819	6.75819	5.09283	93.0398	86.9602	96.9381	20	19.8	15.9047	13.8	2.85657	3	1.26491	43.8685	38.0922	14.35	4.19488	0.94	0.421189	1.12767	0.191351	187.8	46.3828	0.9	0.325945	2.778	0.813004	97.3602	57.1094	2.6e-08	3.2e-08	39.4159	48.2513	902.12	1206.39	505.324	665.007	92.76	75.7382	4.6332	6.24412	1113.44	246.759
115	CdGeO3	-1.86132	1.4172	6.51295	148	118.836	5.90404	5.90404	5.90404	52.1954	52.1954	52.1954	10	20.8	16.473	14.8	1.6	3	1.26491	46.6098	39.5433	15.742	1.99163	0.92	0.403237	1.128	0.190725	185.6	44.0572	0.904	0.32946	2.804	0.785483	108.373	54.8547	0.000100014	0.000199993	31.4159	40.1851	880.72	1165.7	394.004	458.999	92.76	75.7382	7.7532	12.2517	1113.76	246.301
116	CdGeO3	-1.88172	1.5283	5.65077	15	273.936	5.48469	7.16397	7.16397	87.1674	80.6206	80.6206	20	20.8	16.473	14.8	1.6	3	1.26491	46.6098	39.5433	15.742	1.99163	0.92	0.403237	1.128	0.190725	185.6	44.0572	0.904	0.32946	2.804	0.785483	108.373	54.8547	0.000100014	0.000199993	31.4159	40.1851	880.72	1165.7	394.004	458.999	92.76	75.7382	7.7532	12.2517	1113.76	246.301
117	CdGeO3	-1.8661	1.301	6.21361	88	996.49	10.8989	10.8989	10.8989	109.124	109.124	110.167	80	20.8	16.473	14.8	1.6	3	1.26491	46.6098	39.5433	15.742	1.99163	0.92	0.403237	1.128	0.190725	185.6	44.0572	0.904	0.32946	2.804	0.785483	108.373	54.8547	0.000100014	0.000199993	31.4159	40.1851	880.72	1165.7	394.004	458.999	92.76	75.7382	7.7532	12.2517	1113.76	246.301
118	CdGeO3	-1.58087	0.106	7.15094	221	54.117	3.78249	3.78249	3.78249	90	90	90	5	20.8	16.473	14.8	1.6	3	1.26491	46.6098	39.5433	15.742	1.99163	0.92	0.403237	1.128	0.190725	185.6	44.0572	0.904	0.32946	2.804	0.785483	108.373	54.8547	0.000100014	0.000199993	31.4159	40.1851	880.72	1165.7	394.004	458.999	92.76	75.7382	7.7532	12.2517	1113.76	246.301
119	CdGeO3	-1.76502	0.8428	7.16712	62	215.979	5.31191	5.36356	7.58068	90	90	90	20	20.8	16.473	14.8	1.6	3	1.26491	46.6098	39.5433	15.742	1.99163	0.92	0.403237	1.128	0.190725	185.6	44.0572	0.904	0.32946	2.804	0.785483	108.373	54.8547	0.000100014	0.000199993	31.4159	40.1851	880.72	1165.7	394.004	458.999	92.76	75.7382	7.7532	12.2517	1113.76	246.301
120	CdSO3	-1.7879	3.4226	4.09387	14	624.565	5.65377	8.75329	12.8237	90	90	100.22	40	17.6	15.5126	15.2	1.6	2.8	1.16619	38.4948	37.4782	16.122	1.71437	0.87	0.373631	1.15	0.1502	177.6	38.7639	0.872	0.306098	2.918	0.698524	124.668	66.4482	2e+22	4e+22	19.4569	38.7716	405.694	399.602	229.396	223.525	355.56	482.946	1.7392	2.354	1161.28	190.435
121	CdSO3	-1.78521	3.0386	4.24467	148	451.782	8.33583	8.33583	8.33583	109.108	109.108	109.108	30	17.6	15.5126	15.2	1.6	2.8	1.16619	38.4948	37.4782	16.122	1.71437	0.87	0.373631	1.15	0.1502	177.6	38.7639	0.872	0.306098	2.918	0.698524	124.668	66.4482	2e+22	4e+22	19.4569	38.7716	405.694	399.602	229.396	223.525	355.56	482.946	1.7392	2.354	1161.28	190.435
122	CdSeO3	-1.42159	3.0881	5.53377	62	287.314	5.37757	6.4244	8.31645	90	90	90	20	21.2	16.7619	15.2	1.6	3	1.26491	47.8738	40.4459	16.3	1.68969	0.9	0.388587	1.17667	0.104902	176.2	38.452	0.9	0.325945	2.912	0.701524	123.579	65.2314	1.6e-08	2.73e-08	19.5199	38.7405	453.72	445.974	250.524	241.798	445.96	662.73	2.4732	2.7718	1149.56	201.506
123	CdSeO3	-1.43144	3.4047	4.77682	14	665.685	5.8404	8.83238	13.1503	90	90	101.091	40	21.2	16.7619	15.2	1.6	3	1.26491	47.8738	40.4459	16.3	1.68969	0.9	0.388587	1.17667	0.104902	176.2	38.452	0.9	0.325945	2.912	0.701524	123.579	65.2314	1.6e-08	2.73e-08	19.5199	38.7405	453.72	445.974	250.524	241.798	445.96	662.73	2.4732	2.7718	1149.56	201.506
124	CdSiO3	-2.53383	2.5256	4.72475	60	529.98	9.85232	9.74506	5.51997	90	90	90	40	17.2	15.5743	14.8	1.6	2.8	1.16619	37.6989	37.6482	15.428	2.38481	0.89	0.382623	1.082	0.278883	183.6	42.2308	0.892	0.319399	2.782	0.808614	111.199	55.6839	0.000200014	0.000399993	49.4159	62.7683	896.72	1196.11	489.124	634.329	92.76	75.7382	11.4332	19.5258	1118.66	239.401
125	CdSiO3	-2.56078	2.573	4.71686	14	796.3	7.08668	7.3623	15.3217	90	95.0444	90	60	17.2	15.5743	14.8	1.6	2.8	1.16619	37.6989	37.6482	15.428	2.38481	0.89	0.382623	1.082	0.278883	183.6	42.2308	0.892	0.319399	2.782	0.808614	111.199	55.6839	0.000200014	0.000399993	49.4159	62.7683	896.72	1196.11	489.124	634.329	92.76	75.7382	11.4332	19.5258	1118.66	239.401
126	CdSiO3	-2.18614	0.6503	6.59859	221	47.4348	3.61992	3.61992	3.61992	90	90	90	5	17.2	15.5743	14.8	1.6	2.8	1.16619	37.6989	37.6482	15.428	2.38481	0.89	0.382623	1.082	0.278883	183.6	42.2308	0.892	0.319399	2.782	0.808614	111.199	55.6839	0.000200014	0.000399993	49.4159	62.7683	896.72	1196.11	489.124	634.329	92.76	75.7382	11.4332	19.5258	1118.66	239.401
127	CdSnO3	-1.8327	0.6904	7.31613	62	253.406	5.55403	5.67787	8.03569	90	90	90	20	24.4	20.0958	14.8	1.6	3.2	1.46969	55.8238	48.8154	16.274	1.68864	0.96	0.442041	1.14	0.168404	188.2	46.8376	0.944	0.372322	2.794	0.795779	106.045	54.6034	3.7e-08	4.75e-08	32.8159	41.264	837.12	1083.31	252.74	244.059	92.76	75.7382	2.7932	3.15683	1103.08	261.981
128	CdSnO3	-1.863	0.9762	6.80846	148	136.151	6.02233	6.02233	6.02234	54.9104	54.9104	54.9104	10	24.4	20.0958	14.8	1.6	3.2	1.46969	55.8238	48.8154	16.274	1.68864	0.96	0.442041	1.14	0.168404	188.2	46.8376	0.944	0.372322	2.794	0.795779	106.045	54.6034	3.7e-08	4.75e-08	32.8159	41.264	837.12	1083.31	252.74	244.059	92.76	75.7382	2.7932	3.15683	1103.08	261.981
129	CeCrO3	-2.9622	0.0113	6.68775	221	59.6184	3.90655	3.90655	3.90655	90	90	90	5	21.2	19.4155	11.6	5.42586	3.6	2.33238	48.0221	48.1112	16	4.57073	1.01	0.52192	1.16	0.130231	196.6	58.6706	1.012	0.486555	2.62	1.01871	109.99	37.9537	1.73e-07	2.88e-07	21.0159	36.7387	1369.52	1581.92	682.48	845.357	92.76	75.7382	5.3332	7.85408	1025.26	354.395
130	CeFeO3	-2.96974	0.6736	6.58907	62	245.925	5.46703	5.78395	7.77725	89.9957	89.9857	89.9931	20	21.6	19.4895	12	5.05964	3.6	2.33238	48.7918	48.1993	15.972	4.62448	1.01	0.52192	1.1425	0.160888	196.4	58.5068	1	0.48	2.654	0.988486	100.043	52.3934	1.68e-07	2.89e-07	18.2159	31.183	1407.52	1621.08	608.68	717.899	92.76	75.7382	3.9932	5.31243	1047.18	333.457
131	CeGaO3	-2.25286	0.1406	4.98029	221	85.9686	4.41347	4.41347	4.41347	90	90	90	5	22.6	19.8151	13	4.64758	3.6	2.33238	51.5674	48.9198	16.914	2.86384	0.99	0.508331	1.124	0.194895	194	56.7239	0.998	0.479016	2.65	0.991847	105.428	44.0523	1.76e-07	2.87e-07	8.01595	11.3201	1276.12	1497.75	307.062	392.416	92.76	75.7382	2.3512	2.60788	1010.44	370.825
132	CeGaO3	-2.90572	0.0552	7.24901	221	59.0631	3.89438	3.89438	3.89438	90	90	90	5	22.6	19.8151	13	4.64758	3.6	2.33238	51.5674	48.9198	16.914	2.86384	0.99	0.508331	1.124	0.194895	194	56.7239	0.998	0.479016	2.65	0.991847	105.428	44.0523	1.76e-07	2.87e-07	8.01595	11.3201	1276.12	1497.75	307.062	392.416	92.76	75.7382	2.3512	2.60788	1010.44	370.825
133	CeNiO3	-2.64702	0.9323	7.02404	62	233.389	5.31928	5.71973	7.671	90.0046	90.003	89.9983	20	22	19.5959	12.4	4.8	3.6	2.33238	49.3615	48.2961	15.872	4.81687	1	0.514782	1.12	0.202386	195.6	57.8743	0.986	0.473776	2.67	0.975582	119.437	30.5647	1.62e-07	2.9e-07	20.4159	35.547	1417.92	1632.25	592.08	690.337	92.76	75.7382	4.6732	6.58853	1042.1	337.919
134	CeSbO3	-2.50127	0.0296	6.20597	227	331.654	7.76962	7.76962	7.76962	60	60	60	20	26.6	22.8876	13.4	4.71593	3.8	2.4	61.9748	56.6066	18.192	1.2897	1.02	0.529717	1.138	0.169044	197	59.0051	1.032	0.499856	2.698	0.955163	117.314	31.3968	2.28e-07	2.99e-07	7.01595	9.49615	1152.72	1416.96	427.236	459.086	92.76	75.7382	5.1732	7.54557	1061.48	322.288
135	CeVO3	-3.2326	0.0825	6.42621	62	247.089	5.4363	5.7993	7.83743	90	90	90	20	21	19.3907	11.4	5.64269	3.6	2.33238	47.8111	48.0956	16.218	4.15427	1	0.514782	1.1275	0.188375	196	58.1859	1.04	0.505964	2.614	1.02441	107.25	41.4837	1.88e-07	2.87e-07	8.41595	12.0653	1516.72	1747.19	683.08	846.42	92.76	75.7382	5.7932	8.74565	1024.86	354.816
136	CeVO3	-3.00136	0.0178	6.58868	221	60.249	3.92027	3.92027	3.92027	90	90	90	5	21	19.3907	11.4	5.64269	3.6	2.33238	47.8111	48.0956	16.218	4.15427	1	0.514782	1.1275	0.188375	196	58.1859	1.04	0.505964	2.614	1.02441	107.25	41.4837	1.88e-07	2.87e-07	8.41595	12.0653	1516.72	1747.19	683.08	846.42	92.76	75.7382	5.7932	8.74565	1024.86	354.816
137	CoBO3	-1.99404	1.0667	3.37194	9	231.933	5.16445	5.16445	9.91326	90.038	89.962	61.3065	20	11.2	7.98499	14	2.75681	2.4	0.8	23.5485	17.8061	12.628	5.84017	0.8	0.291548	0.991667	0.347627	176.4	35.7189	0.788	0.210751	2.848	0.726812	102.758	48.2386	200000000000	400000000000	25.4159	38.7276	1534.12	1796.48	856.28	998.655	92.76	75.7382	13.3732	19.3307	1100	261.18
138	CoCO3	-1.701	2.3972	4.09094	167	96.5587	4.70976	4.70976	5.71484	65.6654	65.6654	60	10	11.4	7.83837	14.2	2.71293	2.4	0.8	23.7884	17.6402	12.808	5.59209	0.77	0.292575	0.969667	0.385193	173.4	34.9033	0.77	0.20938	2.95	0.636428	121.715	29.8619	2.01e-06	3.99e-06	48.0159	60.1205	1554.12	1826.36	1146.48	1483.43	92.76	75.7382	26.7732	45.5358	1157.08	216.952
139	CoCO3	-1.7011	2.392	4.07542	167	96.9264	5.7234	5.7234	5.7234	48.6481	48.6481	48.6481	10	11.4	7.83837	14.2	2.71293	2.4	0.8	23.7884	17.6402	12.808	5.59209	0.77	0.292575	0.969667	0.385193	173.4	34.9033	0.77	0.20938	2.95	0.636428	121.715	29.8619	2.01e-06	3.99e-06	48.0159	60.1205	1554.12	1826.36	1146.48	1483.43	92.76	75.7382	26.7732	45.5358	1157.08	216.952
140	CoGeO3	-1.82828	1.7938	5.21844	15	228.563	5.23731	6.68082	6.68082	86.2215	81.6263	81.6263	20	16.6	10.6508	14.2	2.71293	2.8	0.979796	35.9143	24.7728	14.476	4.16177	0.88	0.344384	1.06367	0.240459	183.8	41.5423	0.86	0.269518	2.842	0.73355	121.148	29.8823	0.000100012	0.000199994	32.0159	41.1701	1312.72	1497.66	628.76	724.655	92.76	75.7382	9.7332	12.6503	1092.28	270.326
141	CoGeO3	-1.82828	1.4633	5.20165	1	229.3	5.23801	6.69683	6.69059	86.0904	81.6351	81.3546	20	16.6	10.6508	14.2	2.71293	2.8	0.979796	35.9143	24.7728	14.476	4.16177	0.88	0.344384	1.06367	0.240459	183.8	41.5423	0.86	0.269518	2.842	0.73355	121.148	29.8823	0.000100012	0.000199994	32.0159	41.1701	1312.72	1497.66	628.76	724.655	92.76	75.7382	9.7332	12.6503	1092.28	270.326
142	CoSiO3	-2.48746	2.6041	4.0914	61	876.769	5.26525	9.05063	18.3987	90	90	90	80	13	7.37564	14.2	2.71293	2.6	0.8	27.0034	16.637	14.162	4.27154	0.85	0.316228	1.01767	0.305453	181.8	39.509	0.848	0.255061	2.82	0.759368	123.974	30.2061	0.000200012	0.000399994	50.0159	63.2329	1328.72	1516.9	723.88	819.853	92.76	75.7382	13.4132	19.4065	1097.18	264.453
143	CoSnO3	-1.74037	0.9832	6.55906	62	228.5	5.42277	5.39492	7.81053	89.9971	90.0009	89.9986	20	20.2	16.6181	14.2	2.71293	3	1.26491	45.1283	40.3741	15.008	4.18955	0.92	0.393192	1.07567	0.226602	186.4	44.5852	0.9	0.325945	2.832	0.745074	118.82	30.4125	3.5e-08	4.63e-08	33.4159	42.204	1269.12	1447.53	487.496	663.578	92.76	75.7382	4.7732	6.28762	1081.6	283.879
144	CoSnO3	-1.78131	1.1886	6.34832	148	118.043	5.35669	5.66829	5.35669	118.198	60	118.198	10	20.2	16.6181	14.2	2.71293	3	1.26491	45.1283	40.3741	15.008	4.18955	0.92	0.393192	1.07567	0.226602	186.4	44.5852	0.9	0.325945	2.832	0.745074	118.82	30.4125	3.5e-08	4.63e-08	33.4159	42.204	1269.12	1447.53	487.496	663.578	92.76	75.7382	4.7732	6.28762	1081.6	283.879
145	CoTeO3	-1.29325	2.1368	6.53964	62	238.208	5.49592	5.97305	7.25637	89.9983	90.0099	89.9882	20	20.6	17.339	14.6	2.8	3	1.26491	46.9063	43.639	15.842	4.74056	0.91	0.38	1.16833	0.200416	177.8	36.433	0.894	0.316834	2.86	0.713751	135.392	40.517	2e-05	4e-05	20.6159	39.7087	946.32	1214.65	531.012	670.403	92.76	75.7382	6.8732	8.15639	1113.74	246.46
146	CoTeO3	-1.43802	2.3111	6.30205	62	247.188	5.38538	6.06815	7.56408	90	90	90	20	20.6	17.339	14.6	2.8	3	1.26491	46.9063	43.639	15.842	4.74056	0.91	0.38	1.16833	0.200416	177.8	36.433	0.894	0.316834	2.86	0.713751	135.392	40.517	2e-05	4e-05	20.6159	39.7087	946.32	1214.65	531.012	670.403	92.76	75.7382	6.8732	8.15639	1113.74	246.46
147	CrBO3	-2.62095	2.3657	4.04662	167	90.9383	5.55272	5.55272	5.55272	49.4797	49.4797	49.4797	10	10.6	6.8	13.4	3.87814	2.4	0.8	22.1611	15.0523	12.74	5.72915	0.81	0.310483	1.026	0.332	177.4	37.5105	0.812	0.256	2.804	0.788152	102.843	48.1701	200000000000	400000000000	24.2159	36.4224	1482.92	1751.36	938.68	1083.85	92.76	75.7382	14.2332	19.5319	1078.5	290.976
148	CrBiO3	-1.99364	2.4418	8.44792	62	242.931	5.46381	5.67445	7.83542	90.0001	89.9994	89.9999	20	26.2	29.0682	13.8	3.91918	3.2	1.6	61.7949	74.9016	16.124	4.70278	0.96	0.445421	1.151	0.136836	195	56.2139	0.944	0.377656	2.8	0.792061	115.63	32.1634	2.85e-07	5.1e-07	20.4159	36.9214	1010.32	1180.03	577.76	823.255	92.76	75.7382	6.4132	8.16777	1058.98	311.513
149	CrBiO3	-1.98859	1.8397	8.1865	161	125.344	5.62901	5.62901	5.62901	59.7294	59.7294	59.7294	10	26.2	29.0682	13.8	3.91918	3.2	1.6	61.7949	74.9016	16.124	4.70278	0.96	0.445421	1.151	0.136836	195	56.2139	0.944	0.377656	2.8	0.792061	115.63	32.1634	2.85e-07	5.1e-07	20.4159	36.9214	1010.32	1180.03	577.76	823.255	92.76	75.7382	6.4132	8.16777	1058.98	311.513
150	CrBiO3	-1.99364	1.5958	8.4246	62	243.603	5.46918	5.6818	7.83926	90	90	90	20	26.2	29.0682	13.8	3.91918	3.2	1.6	61.7949	74.9016	16.124	4.70278	0.96	0.445421	1.151	0.136836	195	56.2139	0.944	0.377656	2.8	0.792061	115.63	32.1634	2.85e-07	5.1e-07	20.4159	36.9214	1010.32	1180.03	577.76	823.255	92.76	75.7382	6.4132	8.16777	1058.98	311.513
151	CrBiO3	-1.9781	1.5142	8.25203	15	248.697	5.56905	5.56905	9.76391	73.8059	73.8059	60.1777	20	26.2	29.0682	13.8	3.91918	3.2	1.6	61.7949	74.9016	16.124	4.70278	0.96	0.445421	1.151	0.136836	195	56.2139	0.944	0.377656	2.8	0.792061	115.63	32.1634	2.85e-07	5.1e-07	20.4159	36.9214	1010.32	1180.03	577.76	823.255	92.76	75.7382	6.4132	8.16777	1058.98	311.513
152	CrFeO3	-2.09147	1.7407	4.9415	148	104.736	5.11363	5.11363	5.48696	62.2263	62.2263	60	10	14.8	8.35225	12.4	4.45421	2.8	0.979796	31.1679	18.6173	13.28	4.99716	0.92	0.391918	1.1145	0.180336	187.8	46.2964	0.892	0.309218	2.762	0.832115	100.359	52.1716	4.54e-08	5.63e-08	34.8159	42.8375	1269.72	1445.86	831.08	957.879	92.76	75.7382	6.9932	8.55936	1070.88	298.554
153	CrInO3	-2.13652	1.4046	6.47224	62	220.452	5.24029	5.45271	7.71517	90	90.0003	90	20	19.4	16.0449	13.4	3.87814	3	1.26491	42.9625	38.5379	15.014	3.94102	0.95	0.431277	1.132	0.156767	187.6	46.0548	0.928	0.354762	2.752	0.843479	103.226	47.5705	4.14e-08	5.28e-08	35.2159	43.2647	1111.92	1265.6	554.83	825.459	92.76	75.7382	4.8852	7.89556	1030.04	347.843
154	CrPbO3	-1.74689	0.1808	8.48306	221	60.1325	3.91775	3.91775	3.91775	90	90	90	5	26	28.6775	13.6	3.87814	3.2	1.6	61.4389	74.202	15.514	4.15664	1	0.505964	1.1685	0.126052	189.8	48.8279	0.934	0.363186	2.862	0.738929	104.47	45.653	6.74e-08	8.66e-08	25.8159	36.6843	1047.32	1207.94	589.002	823.107	92.76	75.7382	5.1872	7.85641	1061.5	308.661
155	CsBrO3	-1.08041	4.3026	3.94405	160	109.806	4.79284	4.79284	4.79284	87.5584	87.5584	87.5584	5	22.8	19.1979	13.2	6.11228	3.2	1.6	52.1615	47.3547	28.56	21.2107	1.11	0.774855	1.2945	0.296329	196.8	76.875	1.094	0.67497	2.814	1.02893	158.594	90.8376	2e+17	4e+17	7.23995	14.3801	309.32	330.87	146.358	112.705	597.56	690.732	1.7112	2.16864	1090.92	363.84
156	CsIO3	-1.39553	3.0912	4.66025	31	219.356	4.76898	6.82515	6.73926	90	90	90.0011	10	26.4	22.5442	13.2	6.11228	3.4	1.74356	61.5616	55.8344	29.748	20.8489	1.16	0.783837	1.37267	0.218728	200.4	76.7062	1.132	0.683473	2.754	1.02742	152.717	80.2442	200000000000000	400000000000000	7.30575	14.3481	334.4	336.346	170.568	144.327	644.16	696.218	2.1032	2.91946	1064.62	364.101
157	CsNbO3	-2.6037	1.2659	6.26618	221	72.5597	4.17092	4.17092	4.17092	90	90	90	5	24	20.0898	10.8	6.49307	3.4	1.74356	54.762	49.1305	26.77	22.2293	1.17	0.787147	1.282	0.314223	210.8	79.946	1.172	0.701267	2.542	1.12925	111.363	38.7201	7.24e-08	9.05e-08	18.0159	22.7558	1246.32	1914.12	643.198	1057.73	480.36	731.275	5.9112	10.4694	993.36	401.116
158	CsNbO3	-2.85554	3.319	4.58832	14	792.747	5.20612	9.41493	16.1965	90	90	93.0533	40	24	20.0898	10.8	6.49307	3.4	1.74356	54.762	49.1305	26.77	22.2293	1.17	0.787147	1.282	0.314223	210.8	79.946	1.172	0.701267	2.542	1.12925	111.363	38.7201	7.24e-08	9.05e-08	18.0159	22.7558	1246.32	1914.12	643.198	1057.73	480.36	731.275	5.9112	10.4694	993.36	401.116
159	CsUO3	-3.23057	0.4571	8.08123	221	86.0827	4.41542	4.41542	4.41542	90	90	90	5	34.2	34.1549	11	6.32456	4.2	2.85657	83.7865	89.43	27.102	22	1.23	0.817068	1.31625	0.26792	220.6	87.5297	1.226	0.738474	2.498	1.1687	93.6866	59.6783	9.8e-08	1.22e-07	12.6159	15.6792	1082.92	1593.23	374.258	524.307	480.36	731.275	3.3512	5.37333	982.46	410.864
160	CuGeO3	-1.60559	0.4307	4.71095	55	1038.76	8.76871	9.93577	11.9227	90	90	90	80	17	11.0635	14.6	1.95959	2.8	0.979796	36.8368	25.6821	14.564	3.99718	0.88	0.344384	1.074	0.228351	183.4	41.0054	0.868	0.279313	2.846	0.72833	132.205	10.7422	0.000100003	0.000199998	92.0159	155.734	1312.72	1497.66	546.714	604.245	92.76	75.7382	9.1132	12.3915	1089.3	274.025
161	CuSeO3	-1.07179	0.3149	5.14019	62	246.17	5.47678	6.15155	7.30676	90	90	90	20	17.4	11.6207	15	2	2.8	0.979796	38.1008	27.504	15.122	4.02251	0.86	0.324654	1.12267	0.178965	174	34.3162	0.864	0.274634	2.954	0.629717	147.41	25.234	5.44e-09	7.04e-09	80.1199	159.94	885.72	1204.96	403.234	506.675	445.96	662.73	3.8332	5.04878	1125.1	238.289
162	CuSiO3	-2.25366	0.375	3.67981	51	126.018	2.86025	4.91824	8.95814	90	90	90	10	13.4	8.1388	14.6	1.95959	2.6	0.8	27.9259	18.4149	14.25	4.11806	0.85	0.316228	1.028	0.297617	181.4	38.9235	0.856	0.265752	2.824	0.754443	135.031	8.5065	0.000200003	0.000399998	110.016	156.194	1328.72	1516.9	641.834	726.466	92.76	75.7382	12.7932	19.357	1094.2	268.288
163	CuTeO3	-1.22106	0.0401	6.24293	62	254.437	5.82166	6.06974	7.2005	90	90	90	20	21	17.5043	15	2	3	1.26491	47.8288	43.9313	15.93	4.57051	0.91	0.38	1.17867	0.179797	177.4	35.7525	0.902	0.32437	2.864	0.708282	146.45	23.4322	2e-05	4e-05	80.6159	159.696	946.32	1214.65	448.966	522.864	92.76	75.7382	6.2532	7.51659	1110.76	250.767
164	DyAlO3	-3.63683	2.9474	7.71465	221	51.1163	3.71125	3.71125	3.71125	90	90	90	5	20.6	22.7824	14.6	1.74356	3.4	2.33238	47.4959	57.6591	16.218	3.174	0.96	0.468402	1.1172	0.226675	191.2	53.4767	0.992	0.466064	2.63	0.99968	92.938	60.2983	1.91e-07	3.68e-07	49.2159	92.9892	1180.52	1335.45	555.574	657.185	92.76	75.7382	4.4932	5.23266	1017.9	361.425
165	DyAlO3	-3.76569	5.723	7.54728	62	209	5.21946	5.37574	7.44872	90	90	90	20	20.6	22.7824	14.6	1.74356	3.4	2.33238	47.4959	57.6591	16.218	3.174	0.96	0.468402	1.1172	0.226675	191.2	53.4767	0.992	0.466064	2.63	0.99968	92.938	60.2983	1.91e-07	3.68e-07	49.2159	92.9892	1180.52	1335.45	555.574	657.185	92.76	75.7382	4.4932	5.23266	1017.9	361.425
166	DyAlO3	-3.73768	5.166	7.60765	167	103.67	5.23706	5.23706	5.23706	60.9196	60.9196	60.9196	10	20.6	22.7824	14.6	1.74356	3.4	2.33238	47.4959	57.6591	16.218	3.174	0.96	0.468402	1.1172	0.226675	191.2	53.4767	0.992	0.466064	2.63	0.99968	92.938	60.2983	1.91e-07	3.68e-07	49.2159	92.9892	1180.52	1335.45	555.574	657.185	92.76	75.7382	4.4932	5.23266	1017.9	361.425
167	DyCoO3	-2.67074	0.0735	8.08424	62	221.37	5.19014	5.72035	7.45617	90	90	90	20	23.4	22.5353	13.8	2.85657	3.6	2.33238	53.8863	56.7955	15.552	4.48674	0.98	0.482286	1.13587	0.190437	194.2	55.6647	0.98	0.460261	2.684	0.949139	97.3602	57.1094	1.97e-07	3.65e-07	22.2159	39.1235	1262.12	1439.81	722.48	818.211	92.76	75.7382	5.5932	6.77316	1054.48	322.119
168	DyCrO3	-3.22716	2.5578	7.65023	62	227.905	5.30493	5.61195	7.65528	90	90	90	20	22.8	22.4713	13.2	3.91918	3.6	2.33238	52.4989	56.74	15.664	4.26515	0.99	0.490306	1.1702	0.125476	195.2	56.5169	1.004	0.473016	2.64	0.989626	97.4456	57.0596	2.11e-07	3.61e-07	21.0159	36.7387	1210.92	1372.99	804.88	932.164	92.76	75.7382	6.4532	8.1901	1032.98	343.883
169	DyFeO3	-2.96656	1.694	7.59471	62	232.938	5.33684	5.65107	7.72369	90	90	90	20	23.2	22.5069	13.6	3.2	3.6	2.33238	53.2686	56.7541	15.636	4.32052	0.99	0.490306	1.1527	0.158197	195	56.3418	0.992	0.466064	2.674	0.957781	87.4994	65.657	2.05e-07	3.62e-07	18.2159	31.183	1248.92	1422.18	731.08	829.306	92.76	75.7382	5.1132	6.05101	1054.9	321.737
170	DyGaO3	-3.14966	3.6351	8.20835	62	226.753	5.30396	5.59509	7.64094	90	90	90	20	24.2	22.7192	14.6	1.74356	3.6	2.33238	56.0442	57.1502	16.578	2.47299	0.97	0.474974	1.1342	0.193656	192.6	54.4265	0.99	0.465016	2.67	0.961332	92.8836	60.3445	2.13e-07	3.61e-07	8.01595	11.3201	1117.52	1263.43	429.462	632.61	92.76	75.7382	3.4712	4.34419	1018.16	361.108
171	DyLuO3	-4.00847	4.634	9.4286	62	271.548	5.87614	8.23375	5.61251	90	90	90	20	32.2	29.681	15.4	1.74356	4.4	2.93939	77.093	74.9279	17.774	0.639049	1.06	0.563383	1.1824	0.10355	198.8	60.038	1.092	0.55391	2.562	1.07544	91.1476	61.9028	3.01e-07	3.85e-07	5.41595	6.78734	1357.12	1573.96	753.88	859.693	92.76	75.7382	6.7532	8.7101	1007.1	374.976
172	DyMnO3	-3.05312	0.1254	7.52972	62	234.148	5.32775	5.86604	7.49207	90	90	90	20	23	22.4856	13.4	3.55528	3.6	2.33238	53.0872	56.747	15.688	4.21769	0.99	0.490306	1.11187	0.237091	195.2	56.5169	1.002	0.47178	2.618	1.01213	84.5856	69.0639	4.73e-07	6.02e-07	3.77595	4.7022	1088.92	1233.6	672.68	758.456	92.76	75.7382	4.9932	5.88112	1045.86	330.345
173	DyMnO3	-3.05262	0.4134	7.51465	62	234.618	5.3373	5.84123	7.5255	90.0081	89.9754	89.9998	20	23	22.4856	13.4	3.55528	3.6	2.33238	53.0872	56.747	15.688	4.21769	0.99	0.490306	1.11187	0.237091	195.2	56.5169	1.002	0.47178	2.618	1.01213	84.5856	69.0639	4.73e-07	6.02e-07	3.77595	4.7022	1088.92	1233.6	672.68	758.456	92.76	75.7382	4.9932	5.88112	1045.86	330.345
174	DyNiO3	-2.41021	0.0362	8.17469	62	218.726	5.21643	5.62117	7.45933	90	90	90	20	23.6	22.5708	14	2.52982	3.6	2.33238	53.8383	56.7913	15.536	4.51842	0.98	0.482286	1.1302	0.201396	194.2	55.6647	0.978	0.459408	2.69	0.944119	106.893	54.6491	2e-07	3.64e-07	20.4159	35.547	1259.32	1436.05	714.48	808.082	92.76	75.7382	5.7932	7.09073	1049.82	326.479
175	DyScO3	-3.98054	4.4572	6.77605	62	250.406	5.45367	5.74784	7.98825	90	90	90	20	22.2	22.4713	12.6	5.04381	3.6	2.33238	51.0908	56.8223	17.218	1.27994	1.03	0.528772	1.1592	0.14592	197.8	58.9929	1.062	0.521091	2.58	1.05421	88.2056	64.8832	2.95e-07	3.81e-07	5.41595	6.78734	1242.72	1413.99	731.68	830.088	92.76	75.7382	5.5532	6.7107	1029	348.345
176	DyTmO3	-3.98032	4.5265	9.08537	62	277.397	5.90736	8.32894	5.63791	90	90	90	20	31.8	29.1644	15	1.54919	4.4	2.93939	75.8865	73.3746	18.038	0.830865	1.06	0.563383	1.2012	0.0729093	202.2	63.9325	1.098	0.561013	2.558	1.08027	104.442	54.6607	3.2e-07	4e-07	5.61595	7.10363	1066.72	1211.8	732.48	831.132	92.76	75.7382	5.7132	6.96268	1021.74	356.798
177	DyVO3	-3.30597	1.5132	7.42341	62	233.925	5.33421	5.7431	7.6359	90	90	90	20	22.6	22.4642	13	4.28952	3.6	2.33238	52.2879	56.7434	15.882	3.83462	0.98	0.482286	1.1377	0.186901	194.6	55.9986	1.032	0.493413	2.634	0.995622	94.7056	58.8851	2.25e-07	3.59e-07	8.41595	12.0653	1358.12	1575.43	805.48	933.05	92.76	75.7382	6.9132	8.99151	1032.58	344.325
178	ErAlO3	-3.77924	5.803	7.79771	62	206.341	5.17638	5.37966	7.40977	90	90	90	20	21	23.5797	15	1.26491	3.4	2.33238	48.4477	59.5577	16.108	3.08357	0.96	0.468402	1.097	0.229033	190.8	52.8068	0.986	0.455702	2.634	0.994054	92.938	60.2983	1.77e-07	3.41e-07	50.0159	92.6736	1240.72	1413.41	579.974	699.39	92.76	75.7382	6.2532	7.93896	1021.16	357.449
179	ErBiO3	-2.81229	2.4634	8.99994	148	156.548	5.98567	5.98585	6.11546	60.7001	119.302	120.004	10	35	33.4066	15.4	0.8	4	2.52982	84.8475	85.3473	18.37	1.53049	1.03	0.528772	1.169	0.111463	201.8	63.4426	1.038	0.49487	2.716	0.920383	102.77	54.9201	4.32e-07	5.47e-07	4.61595	6.04098	1049.72	1245.42	502.16	677.017	92.76	75.7382	6.2932	7.96173	1046.26	328.661
180	ErBiO3	-2.83274	3.1136	8.92572	161	157.85	5.99852	5.99852	6.13627	60.7398	119.26	120	10	35	33.4066	15.4	0.8	4	2.52982	84.8475	85.3473	18.37	1.53049	1.03	0.528772	1.169	0.111463	201.8	63.4426	1.038	0.49487	2.716	0.920383	102.77	54.9201	4.32e-07	5.47e-07	4.61595	6.04098	1049.72	1245.42	502.16	677.017	92.76	75.7382	6.2932	7.96173	1046.26	328.661
181	ErCoO3	-2.68772	1.4434	8.80724	62	206.786	5.12502	5.48015	7.36264	90	90	90	20	23.8	23.2929	14.2	2.71293	3.6	2.33238	54.8381	58.6184	15.442	4.40664	0.98	0.482286	1.11567	0.19518	193.8	55.0433	0.974	0.449604	2.688	0.942983	97.3602	57.1094	1.84e-07	3.39e-07	23.0159	38.9264	1322.32	1509.15	746.88	847.69	92.76	75.7382	7.3532	8.81192	1057.74	317.276
182	ErCrO3	-3.23926	2.5769	7.90782	62	224.479	5.2675	5.59176	7.62117	90	90	90	20	23.2	23.2413	13.6	3.87814	3.6	2.33238	53.4507	58.5871	15.554	4.18375	0.99	0.490306	1.15	0.137695	194.8	55.9121	0.998	0.462964	2.644	0.983902	97.4456	57.0596	1.97e-07	3.35e-07	21.8159	36.555	1271.12	1447.67	829.28	956.043	92.76	75.7382	8.2132	9.78902	1036.24	339.557
183	ErFeO3	-2.97717	1.7067	7.84512	62	229.531	5.3031	5.62506	7.69459	90	90	90	20	23.6	23.2689	14	3.09839	3.6	2.33238	54.2204	58.5882	15.526	4.23946	0.99	0.490306	1.1325	0.165937	194.6	55.7337	0.986	0.455702	2.678	0.951723	87.4994	65.657	1.92e-07	3.36e-07	19.0159	31.0386	1309.12	1492.87	755.48	858.159	92.76	75.7382	6.8732	8.3713	1058.16	316.883
184	ErInO3	-2.96864	2.5532	8.31502	62	263.669	5.52123	5.84036	8.1768	90	90	90	20	28.2	25.459	15	1.26491	3.8	2.4	66.015	63.4614	17.26	0.862554	1.02	0.518266	1.15	0.137695	194.4	55.5575	1.022	0.480766	2.668	0.9608	90.3656	62.6549	1.88e-07	3.37e-07	19.4159	31.8249	1151.32	1323.75	479.23	677.14	92.76	75.7382	4.7652	7.65833	1017.32	362.265
185	ErLuO3	-4.01439	5.073	9.65749	62	268.385	5.84387	8.22651	5.58269	90	90	90	20	32.6	30.1437	15.8	0.979796	4.4	2.93939	78.0448	76.0289	17.664	0.429958	1.06	0.563383	1.1622	0.120131	198.4	59.4932	1.086	0.546319	2.566	1.07047	91.1476	61.9028	2.88e-07	3.64e-07	6.21595	7.58699	1417.32	1634.13	778.28	886.932	92.76	75.7382	8.5132	10.1763	1010.36	371.24
186	ErMnO3	-3.06227	0.5648	7.78092	62	230.651	5.29358	5.84403	7.45579	90	90	90	20	23.4	23.2517	13.8	3.48712	3.6	2.33238	54.039	58.5843	15.578	4.136	0.99	0.490306	1.09167	0.238896	194.8	55.9121	0.996	0.461675	2.622	1.00663	84.5856	69.0639	4.6e-07	5.92e-07	4.57595	6.01906	1149.12	1321.78	697.08	791.703	92.76	75.7382	6.7532	8.27489	1049.12	325.711
187	ErNiO3	-2.42356	0.0557	8.44281	62	215.523	5.16495	5.65932	7.37332	90	89.9397	90	20	24	23.3238	14.4	2.33238	3.6	2.33238	54.7901	58.6151	15.426	4.43849	0.98	0.482286	1.11	0.205329	193.8	55.0433	0.972	0.448705	2.694	0.937904	106.893	54.6491	1.86e-07	3.38e-07	21.2159	35.3707	1319.52	1505.67	738.88	838.15	92.76	75.7382	7.5532	9.01935	1053.08	321.748
188	ErVO3	-3.31655	1.6168	7.67395	62	230.407	5.29323	5.71852	7.61188	90	90	90	20	23	23.2379	13.4	4.27083	3.6	2.33238	53.2397	58.5939	15.772	3.75028	0.98	0.482286	1.1175	0.191924	194.2	55.3838	1.026	0.484132	2.638	0.989958	94.7056	58.8851	2.12e-07	3.33e-07	9.21595	12.3396	1418.32	1635.51	829.88	956.891	92.76	75.7382	8.6732	10.3911	1035.84	340.009
189	EuAlO3	-3.3373	0.0109	7.02312	62	214.633	5.33484	5.32866	7.55019	90	90	90	20	20	21.587	14	2.75681	3.4	2.33238	45.3887	53.4571	18.21	6.0885	0.98	0.502593	1.1307	0.229092	191.6	54.1502	0.998	0.476504	2.626	1.00534	109.611	40.6048	1.85e-07	3.57e-07	49.8159	92.75	972.52	1125.23	439.374	473.905	92.76	75.7382	4.1132	4.78928	1012.72	367.892
190	EuFeO3	-2.53692	0.0822	7.09339	62	239.534	5.49831	5.5879	7.79633	90	90	90	20	22.6	21.3691	13	3.68782	3.6	2.33238	51.1614	52.7109	17.628	6.92684	1.01	0.52192	1.1662	0.158648	195.4	56.9547	0.998	0.476504	2.67	0.963867	104.172	50.0506	2e-07	3.52e-07	18.8159	31.067	1040.92	1238.45	614.88	721.962	92.76	75.7382	4.7332	5.71335	1049.72	329.567
191	EuHfO3	-3.73588	0.4796	8.89455	221	70.6539	4.13406	4.13404	4.13414	89.9996	89.9998	89.9999	5	31.8	29.2875	12.2	4.91528	4	2.52982	75.6904	73.586	18.898	5.25987	1.04	0.547175	1.1657	0.159637	197.2	58.5812	1.078	0.539793	2.564	1.07334	101.528	54.834	2.48e-07	3.52e-07	7.41595	9.48705	1389.32	1864.87	753.88	964.901	92.76	75.7382	7.0732	9.84771	1028.92	349.704
192	EuTiO3	-3.57268	0.0673	6.79002	221	60.6081	3.92805	3.92805	3.92805	90	90	90	5	21.8	21.3016	12.2	4.91528	3.6	2.33238	49.5658	52.6657	18.338	5.91892	1.01	0.52192	1.16603	0.158978	195.8	57.3006	1.046	0.509415	2.612	1.01977	102.778	52.5605	2.6e-07	3.56e-07	7.21595	9.16136	1126.12	1385.44	640.88	765.592	92.76	75.7382	5.7132	7.36579	1028.98	349.641
193	EuZrO3	-3.56232	0.2651	6.53882	221	73.947	4.19825	4.19687	4.19688	90.0001	90	89.9999	5	25.4	22.5175	12.2	4.91528	3.8	2.4	58.2372	55.1814	19.014	5.14333	1.04	0.547175	1.1677	0.155683	197	58.3918	1.078	0.539793	2.57	1.06632	109.479	40.8253	2.67e-07	3.58e-07	7.41595	9.48705	1350.52	1792.54	678.28	830.045	92.76	75.7382	6.1732	8.18836	1025.22	353.679
194	FeBO3	-2.27122	0.5711	3.23673	15	117.642	4.99939	8.66826	5.46536	90	92.374	29.8959	10	11	7.58947	13.8	3.1241	2.4	0.8	22.9308	16.5793	12.712	5.75629	0.81	0.310483	1.0085	0.338318	177.2	37.1505	0.8	0.233238	2.838	0.740281	92.8972	59.0151	200000000000	400000000000	21.4159	31.0992	1520.92	1784.4	864.88	1006.62	92.76	75.7382	12.8932	19.2843	1100.42	260.635
195	FeBO3	-2.36349	1.7457	4.08491	167	93.2151	5.60121	5.60121	5.60121	49.4375	49.4375	49.4375	10	11	7.58947	13.8	3.1241	2.4	0.8	22.9308	16.5793	12.712	5.75629	0.81	0.310483	1.0085	0.338318	177.2	37.1505	0.8	0.233238	2.838	0.740281	92.8972	59.0151	200000000000	400000000000	21.4159	31.0992	1520.92	1784.4	864.88	1006.62	92.76	75.7382	12.8932	19.2843	1100.42	260.635
196	FeBiO3	-1.71303	1.7848	7.67875	160	67.6485	4.07634	4.07634	4.07634	88.313	88.313	88.313	5	26.6	29.0489	14.2	3.1241	3.2	1.6	62.5647	74.8167	16.096	4.75577	0.96	0.445421	1.1335	0.16533	194.8	56.0371	0.932	0.366955	2.834	0.744623	105.684	49.5104	2.8e-07	5.11e-07	17.6159	31.3445	1048.32	1243.07	503.96	680.474	92.76	75.7382	5.0732	6.01184	1080.9	284.885
197	FeBiO3	-1.74158	1.5185	8.36269	62	248.464	5.49434	5.72796	7.8949	90	90	90	20	26.6	29.0489	14.2	3.1241	3.2	1.6	62.5647	74.8167	16.096	4.75577	0.96	0.445421	1.1335	0.16533	194.8	56.0371	0.932	0.366955	2.834	0.744623	105.684	49.5104	2.8e-07	5.11e-07	17.6159	31.3445	1048.32	1243.07	503.96	680.474	92.76	75.7382	5.0732	6.01184	1080.9	284.885
198	FeBiO3	-1.53063	0.5996	8.47378	221	61.3015	3.94278	3.94307	3.94307	89.9261	89.9256	89.9256	5	26.6	29.0489	14.2	3.1241	3.2	1.6	62.5647	74.8167	16.096	4.75577	0.96	0.445421	1.1335	0.16533	194.8	56.0371	0.932	0.366955	2.834	0.744623	105.684	49.5104	2.8e-07	5.11e-07	17.6159	31.3445	1048.32	1243.07	503.96	680.474	92.76	75.7382	5.0732	6.01184	1080.9	284.885
199	FeBiO3	-1.7341	1.3463	7.49096	99	69.3444	3.7527	3.7527	4.92407	90	90	90	5	26.6	29.0489	14.2	3.1241	3.2	1.6	62.5647	74.8167	16.096	4.75577	0.96	0.445421	1.1335	0.16533	194.8	56.0371	0.932	0.366955	2.834	0.744623	105.684	49.5104	2.8e-07	5.11e-07	17.6159	31.3445	1048.32	1243.07	503.96	680.474	92.76	75.7382	5.0732	6.01184	1080.9	284.885
200	FeBiO3	-1.71303	1.9309	7.68493	160	67.5941	4.07497	4.07497	4.07497	88.4581	88.4581	88.4581	5	26.6	29.0489	14.2	3.1241	3.2	1.6	62.5647	74.8167	16.096	4.75577	0.96	0.445421	1.1335	0.16533	194.8	56.0371	0.932	0.366955	2.834	0.744623	105.684	49.5104	2.8e-07	5.11e-07	17.6159	31.3445	1048.32	1243.07	503.96	680.474	92.76	75.7382	5.0732	6.01184	1080.9	284.885
201	FeBiO3	-1.58784	1.5456	8.43213	1	123.209	5.61006	5.60603	5.60395	59.4221	59.5492	59.5308	10	26.6	29.0489	14.2	3.1241	3.2	1.6	62.5647	74.8167	16.096	4.75577	0.96	0.445421	1.1335	0.16533	194.8	56.0371	0.932	0.366955	2.834	0.744623	105.684	49.5104	2.8e-07	5.11e-07	17.6159	31.3445	1048.32	1243.07	503.96	680.474	92.76	75.7382	5.0732	6.01184	1080.9	284.885
202	FeBiO3	-1.74965	1.9504	8.02255	161	129.499	5.72151	5.72151	5.72151	59.0266	59.0266	59.0266	10	26.6	29.0489	14.2	3.1241	3.2	1.6	62.5647	74.8167	16.096	4.75577	0.96	0.445421	1.1335	0.16533	194.8	56.0371	0.932	0.366955	2.834	0.744623	105.684	49.5104	2.8e-07	5.11e-07	17.6159	31.3445	1048.32	1243.07	503.96	680.474	92.76	75.7382	5.0732	6.01184	1080.9	284.885
203	FeBiO3	-1.74965	1.9066	8.00789	161	129.736	5.64169	5.64169	5.72381	60.4735	60.4735	60	10	26.6	29.0489	14.2	3.1241	3.2	1.6	62.5647	74.8167	16.096	4.75577	0.96	0.445421	1.1335	0.16533	194.8	56.0371	0.932	0.366955	2.834	0.744623	105.684	49.5104	2.8e-07	5.11e-07	17.6159	31.3445	1048.32	1243.07	503.96	680.474	92.76	75.7382	5.0732	6.01184	1080.9	284.885
204	FeCO3	-1.67682	0.0241	3.81453	167	100.867	5.80227	5.80227	5.80227	48.6116	48.6116	48.6116	10	11.2	7.44043	14	3.09839	2.4	0.8	23.1708	16.41	12.892	5.50168	0.78	0.31241	0.9865	0.377795	174.2	36.433	0.782	0.232929	2.94	0.65333	111.855	49.2079	2.02e-06	3.99e-06	44.0159	57.1191	1540.92	1814.62	1155.08	1487.12	92.76	75.7382	26.2932	45.6573	1157.5	216.184
205	FeGeO3	-2.01172	1.5712	4.92801	15	237.87	5.27523	6.79454	6.79454	86.3744	81.391	81.391	20	16.4	10.4614	14	3.09839	2.8	0.979796	35.2966	24.2236	14.56	4.00464	0.89	0.358329	1.0805	0.221384	184.6	42.6408	0.872	0.284422	2.832	0.746817	111.287	49.1065	0.00010002	0.00019999	28.0159	34.8584	1299.52	1481.17	637.36	738.252	92.76	75.7382	9.2532	12.4396	1092.7	269.811
206	FeSiO3	-2.67256	3.0452	3.78357	61	926.417	5.37021	9.22441	18.7015	90	90	90	80	12.8	6.99714	14	3.09839	2.6	0.8	26.3857	15.4555	14.246	4.125	0.86	0.332265	1.0345	0.293327	182.6	40.7018	0.86	0.271293	2.81	0.771907	114.113	49.8661	0.00020002	0.00039999	46.0159	60.5189	1315.52	1500.76	732.48	830.911	92.76	75.7382	12.9332	19.3612	1097.6	263.919
207	FeSiO3	-2.66626	2.7187	3.76867	2	1046.34	6.78252	7.53882	20.8939	84.0202	81.3066	84.1798	90	12.8	6.99714	14	3.09839	2.6	0.8	26.3857	15.4555	14.246	4.125	0.86	0.332265	1.0345	0.293327	182.6	40.7018	0.86	0.271293	2.81	0.771907	114.113	49.8661	0.00020002	0.00039999	46.0159	60.5189	1315.52	1500.76	732.48	830.911	92.76	75.7382	12.9332	19.3612	1097.6	263.919
208	FeSiO3	-2.66993	3.1197	3.75369	15	233.448	5.38701	6.78999	6.78999	86.6317	75.815	75.815	20	12.8	6.99714	14	3.09839	2.6	0.8	26.3857	15.4555	14.246	4.125	0.86	0.332265	1.0345	0.293327	182.6	40.7018	0.86	0.271293	2.81	0.771907	114.113	49.8661	0.00020002	0.00039999	46.0159	60.5189	1315.52	1500.76	732.48	830.911	92.76	75.7382	12.9332	19.3612	1097.6	263.919
209	FeSiO3	-2.66993	2.6283	3.76121	14	465.963	5.39003	9.26441	9.55362	90	102.384	90	40	12.8	6.99714	14	3.09839	2.6	0.8	26.3857	15.4555	14.246	4.125	0.86	0.332265	1.0345	0.293327	182.6	40.7018	0.86	0.271293	2.81	0.771907	114.113	49.8661	0.00020002	0.00039999	46.0159	60.5189	1315.52	1500.76	732.48	830.911	92.76	75.7382	12.9332	19.3612	1097.6	263.919
210	GaBO3	-2.54354	3.8603	4.80239	167	88.886	4.62065	4.62065	5.49786	65.1514	65.1514	60	10	12	9.57079	14.8	1.46969	2.4	0.8	25.7064	22.0998	13.654	5.10808	0.79	0.272764	0.99	0.348712	174.8	32.9023	0.798	0.229469	2.834	0.745751	98.2814	52.4907	200000000000	400000000000	11.2159	13.7187	1389.52	1682.03	563.262	898.025	92.76	75.7382	11.2512	19.4856	1063.68	313.305
211	GaBiO3	-1.92678	3.0525	8.67656	161	125.05	5.64157	5.58496	5.58496	60	60.3314	90	10	27.6	29.0971	15.2	1.16619	3.2	1.6	65.3403	74.7733	17.038	3.03307	0.94	0.427083	1.115	0.197737	192.4	54.1021	0.93	0.365294	2.83	0.75004	111.068	39.8255	2.88e-07	5.09e-07	7.41595	11.2252	916.92	1032.55	202.342	196.175	92.76	75.7382	3.4312	4.27411	1044.16	331.595
212	GaBiO3	-1.97479	1.8782	7.51573	54	288.728	5.19458	5.49398	10.117	90	90	90	20	27.6	29.0971	15.2	1.16619	3.2	1.6	65.3403	74.7733	17.038	3.03307	0.94	0.427083	1.115	0.197737	192.4	54.1021	0.93	0.365294	2.83	0.75004	111.068	39.8255	2.88e-07	5.09e-07	7.41595	11.2252	916.92	1032.55	202.342	196.175	92.76	75.7382	3.4312	4.27411	1044.16	331.595
213	GaBiO3	-1.75091	1.2259	9.18424	221	59.0687	3.89451	3.89451	3.89451	90	90	90	5	27.6	29.0971	15.2	1.16619	3.2	1.6	65.3403	74.7733	17.038	3.03307	0.94	0.427083	1.115	0.197737	192.4	54.1021	0.93	0.365294	2.83	0.75004	111.068	39.8255	2.88e-07	5.09e-07	7.41595	11.2252	916.92	1032.55	202.342	196.175	92.76	75.7382	3.4312	4.27411	1044.16	331.595
214	GaFeO3	-2.06153	2.1247	5.28657	1	436.144	8.85977	9.5317	5.16462	90.1127	89.9321	90.036	40	16.2	10.1666	13.8	3.1241	2.8	0.979796	34.7132	23.3361	14.194	4.15376	0.9	0.368782	1.0785	0.224207	185.2	43.2777	0.878	0.291506	2.792	0.79366	95.7974	55.9833	4.8e-08	6.01e-08	21.8159	31.1812	1176.32	1346.35	455.662	684.448	92.76	75.7382	4.0112	5.31766	1056.06	320.003
215	GaFeO3	-2.0625	2.1045	5.27959	33	436.721	5.16703	8.86343	9.53588	90	90	90	40	16.2	10.1666	13.8	3.1241	2.8	0.979796	34.7132	23.3361	14.194	4.15376	0.9	0.368782	1.0785	0.224207	185.2	43.2777	0.878	0.291506	2.792	0.79366	95.7974	55.9833	4.8e-08	6.01e-08	21.8159	31.1812	1176.32	1346.35	455.662	684.448	92.76	75.7382	4.0112	5.31766	1056.06	320.003
216	GdAlO3	-3.70238	3.2617	7.23566	62	213.181	5.28457	5.37113	7.51059	90	90	90	20	20.2	21.9854	14.2	2.4	3.4	2.33238	46.4459	55.5651	16.396	3.34588	0.97	0.485386	1.106	0.227099	190.8	52.8068	0.996	0.473016	2.626	1.00534	92.938	60.2983	2.67e-07	5.21e-07	49.2159	92.9892	1317.12	1520.34	536.574	624.987	92.76	75.7382	4.2732	4.96662	1021.98	356.461
217	GdBO3	-3.36618	2.2427	4.55767	194	157.438	5.28103	5.28103	6.5184	90	90	120	10	18.6	22.7297	14.2	2.4	3.2	2.4	43.2118	57.0545	15.274	5.5302	0.89	0.465188	1.053	0.329387	184.2	50.1135	0.916	0.458589	2.712	0.930342	89.9834	63.0334	200000000000	400000000000	7.61595	10.5829	1598.72	1859.91	819.68	967.436	92.76	75.7382	12.1332	19.3084	1066.6	308.808
218	GdCoO3	-2.44014	0.1754	7.9855	123	54.935	3.77308	3.85813	3.77378	90	90	90	5	23	21.7807	13.4	3.2	3.6	2.33238	52.8363	54.791	15.73	4.63558	0.99	0.498397	1.12467	0.192034	193.8	55.0433	0.984	0.467401	2.68	0.955322	97.3602	57.1094	2.74e-07	5.19e-07	22.2159	39.1235	1398.72	1605.85	703.48	796.572	92.76	75.7382	5.3732	6.60653	1058.56	316.067
219	GdCrO3	-3.16371	2.488	7.3074	62	233.825	5.3787	5.62763	7.72483	90	90	90	20	22.4	21.7035	12.8	4.11825	3.6	2.33238	51.4489	54.7068	15.842	4.41694	1	0.505964	1.159	0.130859	194.8	55.9121	1.008	0.479767	2.636	0.995381	97.4456	57.0596	2.87e-07	5.14e-07	21.0159	36.7387	1347.52	1550.74	785.88	914.942	92.76	75.7382	6.2332	8.07631	1037.06	338.479
220	GdErO3	-3.98356	3.234	8.04875	5	614.816	9.27883	9.27723	9.27723	109.461	109.474	109.471	40	31.2	28.4422	14.4	2.33238	4.4	2.93939	74.5014	71.7199	18.088	1.00117	1.07	0.575847	1.177	0.102645	201.6	63.1968	1.102	0.566053	2.552	1.08765	84.5856	69.0639	4.34e-07	5.5e-07	5.21595	6.4803	1386.92	1592.74	710.28	805.723	92.76	75.7382	6.1132	7.86514	1024.34	353.537
221	GdFeO3	-2.91326	1.6788	7.29559	62	237.708	5.39494	5.66609	7.77632	90	90	90	20	22.8	21.7476	13.2	3.48712	3.6	2.33238	52.2186	54.7362	15.814	4.47155	1	0.505964	1.1415	0.161289	194.6	55.7337	0.996	0.473016	2.67	0.963867	87.4994	65.657	2.82e-07	5.15e-07	18.2159	31.183	1385.52	1591.2	712.08	808.167	92.76	75.7382	4.8932	5.84587	1058.98	315.672
222	GdGaO3	-3.08799	3.4119	7.85193	62	232.606	5.37317	5.61965	7.70335	90	90	90	20	23.8	21.9854	14.2	2.4	3.6	2.33238	54.9942	55.1996	16.756	2.66613	0.98	0.491528	1.123	0.195131	192.2	53.7788	0.994	0.472	2.666	0.96738	92.8836	60.3445	2.9e-07	5.13e-07	8.01595	11.3201	1254.12	1463.38	410.462	595.079	92.76	75.7382	3.2512	3.96344	1022.24	356.137
223	GdLuO3	-3.96529	3.1346	9.08251	62	278.056	5.93105	8.26429	5.67278	90	90	90	20	31.8	29.2329	15	2.52982	4.4	2.93939	76.043	73.7513	17.952	0.98749	1.07	0.575847	1.1712	0.111246	198.4	59.4932	1.096	0.559056	2.558	1.08045	91.1476	61.9028	3.78e-07	5.17e-07	5.41595	6.78734	1493.72	1719.63	734.88	839.835	92.76	75.7382	6.5332	8.61086	1011.18	370.313
224	GdNiO3	-2.34978	0.0471	7.81773	62	224.252	5.30707	5.56812	7.58879	90	90	90	20	23.2	21.8211	13.6	2.93939	3.6	2.33238	52.7883	54.7857	15.714	4.66686	0.99	0.498397	1.119	0.202593	193.8	55.0433	0.982	0.466579	2.686	0.95036	106.893	54.6491	2.76e-07	5.18e-07	20.4159	35.547	1395.92	1602.72	695.48	785.971	92.76	75.7382	5.5732	6.93808	1053.9	320.569
225	GdScO3	-3.93212	3.2179	6.4848	62	256.275	5.51888	5.78559	8.02616	90	90	90	20	21.8	21.6924	12.2	5.15364	3.6	2.33238	50.0408	54.7652	17.396	1.55014	1.04	0.542586	1.148	0.149753	197.4	58.4315	1.066	0.526786	2.576	1.05939	88.2056	64.8832	3.72e-07	5.15e-07	5.41595	6.78734	1379.32	1584.42	712.68	808.983	92.76	75.7382	5.3332	6.54114	1033.08	343.059
226	GdTiO3	-3.62914	0.0297	7.02765	62	239.231	5.41193	5.7062	7.74672	90	90	90	20	22	21.6887	12.4	4.8	3.6	2.33238	50.623	54.7235	16.524	3.10211	1	0.505964	1.14133	0.161587	195	56.0928	1.044	0.506344	2.612	1.01977	86.1056	67.2452	3.42e-07	5.08e-07	6.61595	8.78804	1470.72	1690.83	738.08	844.382	92.76	75.7382	5.8732	7.44803	1038.24	337.146
227	GdTmO3	-3.93801	3.159	8.80729	62	282.196	5.94979	8.33353	5.69141	90	90	90	20	31.4	28.7026	14.6	2.33238	4.4	2.93939	74.8365	72.1551	18.216	1.07847	1.07	0.575847	1.19	0.0859651	201.8	63.4426	1.102	0.566053	2.554	1.08524	104.442	54.6607	3.97e-07	5.26e-07	5.61595	7.10363	1203.32	1423.92	713.48	810.073	92.76	75.7382	5.4932	6.80458	1025.82	351.724
228	GdVO3	-3.25466	1.4207	7.14168	62	238.271	5.41085	5.69855	7.72752	90	90	90	20	22.2	21.6924	12.6	4.45421	3.6	2.33238	51.2379	54.7063	16.06	3.99307	0.99	0.498397	1.1265	0.188637	194.2	55.3838	1.036	0.499664	2.63	1.00132	94.7056	58.8851	3.02e-07	5.1e-07	8.41595	12.0653	1494.72	1720.89	786.48	915.857	92.76	75.7382	6.6932	8.89936	1036.66	338.934
229	GePbO3	-1.7263	0.2069	9.25941	221	58.7929	3.88844	3.88844	3.88844	90	90	90	5	27.6	28.7444	15.2	0.979796	3.2	1.6	65.5676	74.1361	16.794	1.61995	0.97	0.485386	1.1345	0.189871	186.6	45.5175	0.914	0.344767	2.932	0.630346	115.398	41.0357	0.000100042	0.000199979	19.0159	24.5641	1077.12	1255.28	395.282	459.563	92.76	75.7382	7.4472	12.3031	1083.32	281.682
230	HIO3	-0.940737	3.213	4.33526	19	269.517	5.71644	5.8904	8.00416	90	90	90	20	15.6	18.8955	13.2	6.11228	2.4	1.35647	35.1821	46.2273	17.844	4.56074	0.69	0.38	1.01067	0.50536	154.8	27.2059	0.72	0.343162	3.036	0.515736	158.17	73.4089	200000000000000	400000000000000	0.141848	0.16474	149.656	156.237	113.052	137.808	263.16	281.882	1.7968	2.98444	1251.88	121.741
231	HfCoO3	-2.86159	2.4865	8.26974	62	229.247	5.42595	7.82319	5.40062	90	90.0001	90	20	24.6	24.8161	12.2	4.91528	3.2	1.6	57.0843	62.9391	14.438	4.17018	0.94	0.421189	1.07967	0.222367	188.6	47.4536	0.948	0.404297	2.7	0.924684	97.6304	56.6495	8e-08	1.32e-07	24.6159	38.728	1669.32	2005.32	887.68	1046.42	92.76	75.7382	8.4732	10.5248	1071.58	297.429
232	HfCrO3	-3.11495	1.5871	7.5559	62	244.807	4.9068	5.32921	9.36186	90	90	90	20	24	24.7871	11.6	5.42586	3.2	1.6	55.6969	62.9595	14.55	3.96239	0.95	0.431277	1.114	0.181064	189.6	48.5658	0.972	0.42059	2.656	0.966925	97.7158	56.5988	9.34e-08	1.33e-07	23.4159	36.3963	1618.12	1968.52	970.08	1125.71	92.76	75.7382	9.3332	11.2704	1050.08	322.015
233	HfFeO3	-3.00544	2.1447	7.95612	62	235.705	5.03795	5.3304	8.7772	90.0356	90.0277	89.9923	20	24.4	24.8	12	5.05964	3.2	1.6	56.4666	62.9331	14.522	4.01418	0.95	0.431277	1.0965	0.200247	189.4	48.3388	0.96	0.411825	2.69	0.933724	87.7696	65.2982	8.8e-08	1.32e-07	20.6159	30.9965	1656.12	1995.4	896.28	1053.77	92.76	75.7382	7.9932	10.2116	1072	296.99
234	HfFeO3	-3.03811	2.9099	7.96004	62	235.59	5.42772	5.51153	7.87529	89.9972	89.9996	90.0203	20	24.4	24.8	12	5.05964	3.2	1.6	56.4666	62.9331	14.522	4.01418	0.95	0.431277	1.0965	0.200247	189.4	48.3388	0.96	0.411825	2.69	0.933724	87.7696	65.2982	8.8e-08	1.32e-07	20.6159	30.9965	1656.12	1995.4	896.28	1053.77	92.76	75.7382	7.9932	10.2116	1072	296.99
235	HfMgO3	-3.06006	0.7745	6.16589	221	67.5413	4.07246	4.07246	4.07246	90	90	90	5	21.6	25.2476	10.8	6.4	3	1.54919	50.1586	64.2463	15.904	1.792	0.97	0.453431	1.098	0.198434	190.8	49.9736	0.992	0.43774	2.586	1.04594	84.8558	68.7343	7.68e-08	1.33e-07	36.6159	62.3304	1301.92	1853.78	718.68	954.827	92.76	75.7382	6.9732	9.82813	1067.04	302.278
236	HfMnO3	-3.1893	3.0438	7.76294	62	240.795	5.41662	5.6157	7.91616	90	90	90	20	24.2	24.7903	11.8	5.23068	3.2	1.6	56.2852	62.9359	14.574	3.9181	0.95	0.431277	1.05567	0.258254	189.6	48.5658	0.97	0.419047	2.634	0.990305	84.8558	68.7343	3.56e-07	5.58e-07	6.17595	8.93454	1496.12	1900.29	837.88	1008.58	92.76	75.7382	7.8732	10.1459	1062.96	306.799
237	HfPbO3	-2.97544	2.4163	10.036	221	71.7569	4.15548	4.15548	4.15548	90	90	90	5	35.6	33.9506	13.2	4.66476	3.6	1.95959	86.7376	87.1107	16.756	1.69424	1.03	0.532541	1.1505	0.159408	191.4	50.7054	1.002	0.44741	2.79	0.86014	91.88	61.071	1.1e-07	1.41e-07	11.6159	14.6925	1433.72	1876.73	654.202	949.724	92.76	75.7382	6.1872	9.81574	1062.62	307.183
238	HfPbO3	-3.00189	2.7562	10.2608	62	280.741	5.83669	8.27873	5.81	89.9953	89.9981	90.0115	20	35.6	33.9506	13.2	4.66476	3.6	1.95959	86.7376	87.1107	16.756	1.69424	1.03	0.532541	1.1505	0.159408	191.4	50.7054	1.002	0.44741	2.79	0.86014	91.88	61.071	1.1e-07	1.41e-07	11.6159	14.6925	1433.72	1876.73	654.202	949.724	92.76	75.7382	6.1872	9.81574	1062.62	307.183
239	HfPbO3	-3.00365	2.7902	9.90916	32	581.407	5.93143	8.30397	11.8041	90	90	90	40	35.6	33.9506	13.2	4.66476	3.6	1.95959	86.7376	87.1107	16.756	1.69424	1.03	0.532541	1.1505	0.159408	191.4	50.7054	1.002	0.44741	2.79	0.86014	91.88	61.071	1.1e-07	1.41e-07	11.6159	14.6925	1433.72	1876.73	654.202	949.724	92.76	75.7382	6.1872	9.81574	1062.62	307.183
240	HfPbO3	-3.00721	2.7161	10.0577	55	572.822	5.89739	8.24181	11.7852	90	90	90	40	35.6	33.9506	13.2	4.66476	3.6	1.95959	86.7376	87.1107	16.756	1.69424	1.03	0.532541	1.1505	0.159408	191.4	50.7054	1.002	0.44741	2.79	0.86014	91.88	61.071	1.1e-07	1.41e-07	11.6159	14.6925	1433.72	1876.73	654.202	949.724	92.76	75.7382	6.1872	9.81574	1062.62	307.183
241	HfSnO3	-3.01204	2.3676	6.59256	148	173.897	5.45005	7.45484	5.45016	111.414	60.0011	111.412	10	29.2	26.8805	13.2	4.66476	3.4	1.74356	69.0396	67.6555	16.362	1.51864	0.96	0.442041	1.092	0.205854	189	47.8915	0.992	0.43774	2.716	0.910947	106.315	54.0788	9.1e-08	1.32e-07	18.0159	26.0581	1604.32	1959.4	635.096	951.569	92.76	75.7382	6.6332	9.79184	1061.22	308.773
242	HgSeO3	-1.05788	2.5449	6.4283	62	338.445	6.15762	6.32343	8.69207	90	90	90	20	27.6	28.0685	15.2	1.6	3.2	1.6	65.5096	71.8073	16.518	1.26741	0.89	0.372022	1.20767	0.0973402	175.8	37.6956	0.884	0.302099	2.974	0.596644	123.579	65.2314	1.94e-07	3.83e-07	1.77995	3.26562	371.696	360.036	178.544	172.372	795.96	785.519	1.6712	2.02916	1177.42	167.361
243	HoAlO3	-3.77252	5.8318	7.68666	62	207.31	5.19239	5.379	7.42251	90	90	90	20	20.8	23.181	14.8	1.46969	3.4	2.33238	47.982	58.6286	16.164	3.128	0.96	0.468402	1.0992	0.228431	191.6	54.1502	0.99	0.462601	2.632	0.996863	92.938	60.2983	1.68e-07	3.23e-07	50.2159	92.5989	1211.12	1374.31	566.374	675.756	92.76	75.7382	5.6732	6.96724	1019.5	359.464
244	HoBO3	-3.55031	5.0979	6.19442	167	119.956	6.27272	6.27272	6.27272	46.8282	46.8282	46.8282	10	19.2	23.9282	14.8	1.46969	3.2	2.4	44.7479	60.1248	15.042	5.35275	0.88	0.445646	1.0462	0.329214	185	51.6294	0.91	0.446766	2.718	0.920617	89.9834	63.0334	200000000000	400000000000	8.61595	11.08	1492.72	1759.62	849.48	992.521	92.76	75.7382	13.5332	19.3567	1064.12	312.625
245	HoBiO3	-2.8173	2.7472	9.24094	62	303.258	5.79046	6.20861	8.43538	90	90.007	90	20	34.8	33.2108	15.2	1.16619	4	2.52982	84.3818	84.9015	18.426	1.53786	1.03	0.528772	1.1712	0.108774	202.6	64.4286	1.042	0.500815	2.714	0.923593	102.77	54.9201	4.23e-07	5.4e-07	4.81595	6.38804	1020.12	1196.14	488.56	650.95	92.76	75.7382	5.7132	6.99649	1044.6	330.978
246	HoBiO3	-2.80347	2.4719	8.91644	148	157.147	6.12732	6.12732	6.12732	58.5166	58.5166	58.5166	10	34.8	33.2108	15.2	1.16619	4	2.52982	84.3818	84.9015	18.426	1.53786	1.03	0.528772	1.1712	0.108774	202.6	64.4286	1.042	0.500815	2.714	0.923593	102.77	54.9201	4.23e-07	5.4e-07	4.81595	6.38804	1020.12	1196.14	488.56	650.95	92.76	75.7382	5.7132	6.99649	1044.6	330.978
247	HoCoO3	-2.68083	0.178	8.23801	62	219.197	5.21475	5.73538	7.3289	90	90	90	20	23.6	22.9138	14	2.75681	3.6	2.33238	54.3723	57.7258	15.498	4.44624	0.98	0.482286	1.11787	0.194262	194.6	56.2907	0.978	0.456701	2.686	0.946057	97.3602	57.1094	1.75e-07	3.2e-07	23.2159	38.8873	1292.72	1474.23	733.28	831.034	92.76	75.7382	6.7732	8.02754	1056.08	319.735
248	HoCrO3	-3.23332	2.4964	7.76133	62	226.723	5.286	5.61143	7.64355	90	90	90	20	23	22.8561	13.4	3.87814	3.6	2.33238	52.9849	57.6828	15.61	4.22395	0.99	0.490306	1.1522	0.135836	195.6	57.1265	1.002	0.469655	2.642	0.98676	97.4456	57.0596	1.88e-07	3.17e-07	22.0159	36.5198	1241.52	1410.16	815.68	942.496	92.76	75.7382	7.6332	9.14406	1034.58	341.751
249	HoFeO3	-2.9721	1.7013	7.72907	62	230.977	5.31737	5.63925	7.70282	90	90	90	20	23.4	22.8876	13.8	3.1241	3.6	2.33238	53.7547	57.6902	15.582	4.27951	0.99	0.490306	1.1347	0.164631	195.4	56.9547	0.99	0.462601	2.676	0.954748	87.4994	65.657	1.83e-07	3.18e-07	19.2159	31.0153	1279.52	1457.3	741.88	841.85	92.76	75.7382	6.2932	7.50421	1056.5	319.347
250	HoGaO3	-3.15598	3.6065	8.32158	62	225.608	5.28377	5.59309	7.63411	90	90	89.9997	20	24.4	23.0877	14.8	1.46969	3.6	2.33238	56.5303	58.0567	16.524	2.42172	0.97	0.474974	1.1162	0.197266	193	55.0781	0.988	0.461537	2.672	0.958319	92.8836	60.3445	1.91e-07	3.16e-07	9.01595	11.7522	1148.12	1305.92	440.262	653.967	92.76	75.7382	4.6512	6.51502	1019.76	359.145
251	HoInO3	-2.96606	2.5765	8.21047	62	265.143	5.52587	5.85997	8.1881	90	90	90	20	28	25.1476	14.8	1.46969	3.8	2.4	65.5493	62.7209	17.316	0.943898	1.02	0.518266	1.1522	0.135836	195.2	56.7852	1.026	0.487015	2.666	0.963776	90.3656	62.6549	1.79e-07	3.19e-07	19.6159	31.7996	1121.72	1279.86	465.63	650.599	92.76	75.7382	4.1852	6.51454	1015.66	364.236
252	HoLuO3	-4.01287	4.5867	9.56468	62	269.372	5.57602	5.84943	8.25877	90	90	90	20	32.4	29.9105	15.6	1.35647	4.4	2.93939	77.5791	75.4862	17.72	0.535313	1.06	0.563383	1.1644	0.117767	199.2	60.5884	1.09	0.551362	2.564	1.07295	91.1476	61.9028	2.79e-07	3.49e-07	6.41595	7.82535	1387.72	1603.7	764.68	871.517	92.76	75.7382	7.9332	9.57569	1008.7	373.133
253	HoMnO3	-3.05785	0.5341	7.65796	62	232.335	5.31153	5.84636	7.48185	90	90	90	20	23.2	22.8683	13.6	3.49857	3.6	2.33238	53.5733	57.6847	15.634	4.17634	0.99	0.490306	1.09387	0.238368	195.6	57.1265	1	0.468402	2.62	1.00938	84.5856	69.0639	4.51e-07	5.87e-07	4.77595	6.36857	1119.52	1277.76	683.48	772.969	92.76	75.7382	6.1732	7.38709	1047.46	328.063
254	HoScO3	-3.98491	4.4724	6.88982	62	248.614	5.43751	5.73332	7.9748	90	90	90	20	22.4	22.8613	12.8	5.03587	3.6	2.33238	51.5769	57.7756	17.164	1.20681	1.03	0.528772	1.1412	0.153635	198.2	59.5597	1.06	0.518266	2.582	1.05163	88.2056	64.8832	2.73e-07	3.44e-07	6.41595	7.82535	1273.32	1449.44	742.48	842.612	92.76	75.7382	6.7332	7.98083	1030.6	346.259
255	HoVO3	-3.31177	1.6041	7.55076	62	232.118	5.31063	5.73114	7.62643	90	90	90	20	22.8	22.8508	13.2	4.26146	3.6	2.33238	52.774	57.688	15.828	3.79186	0.98	0.482286	1.1197	0.19097	195	56.618	1.03	0.490306	2.636	0.992786	94.7056	58.8851	2.03e-07	3.15e-07	9.41595	12.4395	1388.72	1605.13	816.28	943.365	92.76	75.7382	8.0932	9.81314	1034.18	342.198
256	InBO3	-2.48115	2.6518	5.29486	167	108.904	5.95794	5.95794	5.95794	48.5279	48.5279	48.5279	10	15.6	16.7404	14.8	1.46969	2.6	1.2	34.7254	40.0967	14.446	5.06604	0.84	0.367967	1.026	0.332	177	36.7913	0.836	0.302099	2.828	0.75404	95.7634	55.3772	200000000000	400000000000	21.8159	31.8538	1363.12	1665.71	588.63	892.084	92.76	75.7382	10.7852	19.6427	1059.58	319.693
257	InBiO3	-1.8101	2.7332	8.48418	33	291.075	5.71046	6.05482	8.41846	90	90	90	20	31.2	30.3803	15.2	1.16619	3.4	1.74356	74.3593	77.4305	17.83	1.84705	0.99	0.477912	1.151	0.136836	194.6	55.8627	0.968	0.402512	2.824	0.758251	108.55	44.2925	2.76e-07	5.13e-07	18.0159	32.1407	890.52	993.265	227.71	214.852	92.76	75.7382	2.9652	4.1382	1040.06	337.399
258	InBiO3	-1.34369	0.0496	8.49725	221	72.6568	4.17259	4.17316	4.17259	90	90	90	5	31.2	30.3803	15.2	1.16619	3.4	1.74356	74.3593	77.4305	17.83	1.84705	0.99	0.477912	1.151	0.136836	194.6	55.8627	0.968	0.402512	2.824	0.758251	108.55	44.2925	2.76e-07	5.13e-07	18.0159	32.1407	890.52	993.265	227.71	214.852	92.76	75.7382	2.9652	4.1382	1040.06	337.399
259	InBiO3	-1.79938	2.3884	8.69701	62	283.952	5.67835	6.09561	8.20361	90	90	90	20	31.2	30.3803	15.2	1.16619	3.4	1.74356	74.3593	77.4305	17.83	1.84705	0.99	0.477912	1.151	0.136836	194.6	55.8627	0.968	0.402512	2.824	0.758251	108.55	44.2925	2.76e-07	5.13e-07	18.0159	32.1407	890.52	993.265	227.71	214.852	92.76	75.7382	2.9652	4.1382	1040.06	337.399
260	InCoO3	-1.57409	1.2126	7.27531	62	202.451	5.12414	5.31383	7.43517	90.0002	89.9994	90.0106	20	20	16.2604	14	2.75681	3	1.26491	44.3499	38.9607	14.902	4.16239	0.94	0.421189	1.09767	0.206095	186.6	44.8357	0.904	0.33212	2.796	0.789369	103.14	47.6407	2.8e-08	3.49e-08	36.4159	44.9297	1163.12	1341.58	472.43	663.863	92.76	75.7382	4.0252	6.20007	1051.54	326.537
261	KBiO3	-1.58144	0.4906	5.51572	12	534.814	8.77023	8.77023	8.94539	109.611	109.821	108.168	30	25.2	29.2123	12.8	5.9127	3.2	1.6	59.2154	75.415	23.866	11.1425	1.12	0.66453	1.267	0.15361	200.6	62.0116	1.084	0.566307	2.632	1.05986	112.447	37.4403	2.75e-07	5.13e-07	21.6159	39.3135	627.92	706.057	209.066	200.045	537.36	844.944	2.7792	4.14167	1012.16	379.255
262	KBiO3	-1.5602	0.1762	5.50951	1	1606.25	8.99008	8.75448	26.2277	107.953	109.596	109.953	90	25.2	29.2123	12.8	5.9127	3.2	1.6	59.2154	75.415	23.866	11.1425	1.12	0.66453	1.267	0.15361	200.6	62.0116	1.084	0.566307	2.632	1.05986	112.447	37.4403	2.75e-07	5.13e-07	21.6159	39.3135	627.92	706.057	209.066	200.045	537.36	844.944	2.7792	4.14167	1012.16	379.255
263	KBiO3	-1.59107	0.4914	5.53464	201	1065.97	10.2152	10.2152	10.2152	90	90	90	60	25.2	29.2123	12.8	5.9127	3.2	1.6	59.2154	75.415	23.866	11.1425	1.12	0.66453	1.267	0.15361	200.6	62.0116	1.084	0.566307	2.632	1.05986	112.447	37.4403	2.75e-07	5.13e-07	21.6159	39.3135	627.92	706.057	209.066	200.045	537.36	844.944	2.7792	4.14167	1012.16	379.255
264	KBrO3	-1.06199	3.8455	3.00905	160	92.1589	4.54175	4.54175	4.54175	83.8165	83.8165	83.8165	5	15.6	10.5943	13.2	6.11228	2.8	0.979796	33.4001	24.9136	23.56	11.2292	1.03	0.622575	1.2365	0.203639	181.8	47.684	1.018	0.53218	2.82	1.01713	159.17	90.1251	2e+17	4e+17	20.0399	39.98	326.92	364.766	153.346	122.749	654.56	801.821	1.7592	2.17912	1099.54	346.91
265	KIO3	-1.38518	2.7768	3.82278	1	371.83	7.78823	7.79091	7.79155	108.926	108.893	108.789	20	19.2	17.4287	13.2	6.11228	3	1.26491	42.8002	42.9932	24.748	11.0797	1.08	0.64	1.31467	0.102796	185.4	48.537	1.056	0.548219	2.76	1.01595	153.293	79.4793	200000000000000	400000000000000	20.1057	39.9475	352	368.545	177.556	151.185	701.16	803.252	2.1512	2.92082	1073.24	347.836
266	KIO3	-1.37993	2.5682	3.81997	160	93.0261	4.53229	4.53229	4.53214	88.6935	88.6935	88.6937	5	19.2	17.4287	13.2	6.11228	3	1.26491	42.8002	42.9932	24.748	11.0797	1.08	0.64	1.31467	0.102796	185.4	48.537	1.056	0.548219	2.76	1.01595	153.293	79.4793	200000000000000	400000000000000	20.1057	39.9475	352	368.545	177.556	151.185	701.16	803.252	2.1512	2.92082	1073.24	347.836
267	KIO3	-1.38361	2.871	3.81322	146	186.381	6.45504	6.45504	6.45504	59.1221	59.1221	59.1221	10	19.2	17.4287	13.2	6.11228	3	1.26491	42.8002	42.9932	24.748	11.0797	1.08	0.64	1.31467	0.102796	185.4	48.537	1.056	0.548219	2.76	1.01595	153.293	79.4793	200000000000000	400000000000000	20.1057	39.9475	352	368.545	177.556	151.185	701.16	803.252	2.1512	2.92082	1073.24	347.836
268	KNO3	-1.5034	3.0554	1.85442	155	90.5328	4.64186	4.64187	4.64187	74.2684	74.2684	74.2684	5	10	4.51664	12.8	5.9127	2.4	0.8	20.2206	9.47033	22.312	11.9063	0.93	0.635295	1.186	0.295675	177.8	48.0017	0.926	0.537684	2.836	1.01984	94.2626	59.2227	1.5e-08	3e-08	20.0211	39.9894	275.992	378.037	112.796	111.913	562.6	830.273	0.6712	0.83112	1151.96	368.197
269	KNbO3	-2.87149	2.3098	4.36874	160	68.4184	4.09003	4.09003	4.09003	89.7968	89.7968	89.7968	5	16.8	12.8281	10.8	6.49307	3	1.26491	36.0006	29.8262	21.77	12.3468	1.09	0.645291	1.224	0.225708	195.8	56.3503	1.096	0.575555	2.548	1.11997	111.939	37.7453	4.54e-08	6.07e-08	30.8159	40.4175	1263.92	1911.66	650.186	1055.56	537.36	844.944	5.9592	10.4523	1001.98	387.999
270	KNbO3	-2.85897	1.4121	4.47469	221	66.7983	4.05747	4.05747	4.05747	90	90	90	5	16.8	12.8281	10.8	6.49307	3	1.26491	36.0006	29.8262	21.77	12.3468	1.09	0.645291	1.224	0.225708	195.8	56.3503	1.096	0.575555	2.548	1.11997	111.939	37.7453	4.54e-08	6.07e-08	30.8159	40.4175	1263.92	1911.66	650.186	1055.56	537.36	844.944	5.9592	10.4523	1001.98	387.999
271	KNbO3	-2.87141	2.0585	4.3605	38	68.5476	4.01755	4.13066	4.13066	90.3522	90	90	5	16.8	12.8281	10.8	6.49307	3	1.26491	36.0006	29.8262	21.77	12.3468	1.09	0.645291	1.224	0.225708	195.8	56.3503	1.096	0.575555	2.548	1.11997	111.939	37.7453	4.54e-08	6.07e-08	30.8159	40.4175	1263.92	1911.66	650.186	1055.56	537.36	844.944	5.9592	10.4523	1001.98	387.999
272	KNbO3	-2.86943	1.476	4.36539	99	68.4708	4.02867	4.02867	4.21874	90	90	90	5	16.8	12.8281	10.8	6.49307	3	1.26491	36.0006	29.8262	21.77	12.3468	1.09	0.645291	1.224	0.225708	195.8	56.3503	1.096	0.575555	2.548	1.11997	111.939	37.7453	4.54e-08	6.07e-08	30.8159	40.4175	1263.92	1911.66	650.186	1055.56	537.36	844.944	5.9592	10.4523	1001.98	387.999
273	KSbO3	-2.06985	2.6657	4.30071	148	161.282	5.47517	5.47517	6.97041	66.8747	66.8747	60	10	18.8	16.6541	12.8	5.9127	3	1.26491	41.7713	40.9827	23.242	11.3536	1.09	0.645291	1.226	0.222135	194	54.5124	1.064	0.552869	2.638	1.05645	114.447	36.4923	9.5e-08	1.55e-07	24.8159	38.7217	632.52	713.95	280.942	329.981	537.36	844.944	4.5392	7.62424	1038.36	361.081
274	KSbO3	-2.02475	1.1348	4.62142	227	300.18	7.51563	7.51563	7.51563	60	60	60	20	18.8	16.6541	12.8	5.9127	3	1.26491	41.7713	40.9827	23.242	11.3536	1.09	0.645291	1.226	0.222135	194	54.5124	1.064	0.552869	2.638	1.05645	114.447	36.4923	9.5e-08	1.55e-07	24.8159	38.7217	632.52	713.95	280.942	329.981	537.36	844.944	4.5392	7.62424	1038.36	361.081
275	KSbO3	-2.05118	1.7859	4.49175	201	926.537	9.74887	9.74887	9.74887	90	90	90	60	18.8	16.6541	12.8	5.9127	3	1.26491	41.7713	40.9827	23.242	11.3536	1.09	0.645291	1.226	0.222135	194	54.5124	1.064	0.552869	2.638	1.05645	114.447	36.4923	9.5e-08	1.55e-07	24.8159	38.7217	632.52	713.95	280.942	329.981	537.36	844.944	4.5392	7.62424	1038.36	361.081
276	KTaO3	-3.09573	2.0983	6.79625	221	65.4917	4.03084	4.03084	4.03084	90	90	90	5	23.2	25.2618	10.8	6.49307	3.2	1.6	53.6089	64.2949	21.774	12.3433	1.09	0.645291	1.224	0.225708	196	56.565	1.1	0.578826	2.528	1.13748	100.476	49.9033	4.2e-08	5.48e-08	31.4159	40.7779	1406.72	2192.69	758.186	1270.6	537.36	844.944	7.7992	14.124	1023.76	370.405
277	KUO3	-3.34561	0.441	6.6435	221	81.2649	4.33146	4.33146	4.33146	90	90	90	5	27	32.778	11	6.32456	3.8	2.71293	65.0251	86.9633	22.102	12.0673	1.15	0.688477	1.25825	0.167219	205.6	68.8436	1.15	0.626929	2.504	1.15996	94.2626	59.2227	7.1e-08	1.08e-07	25.4159	38.7276	1100.52	1592.09	381.246	523.524	537.36	844.944	3.3992	5.36291	991.08	398.303
278	KVO3	-2.20635	0.2186	4.00698	221	57.2046	3.8531	3.8531	3.8531	90	90	90	5	13.2	6.49307	10.8	6.49307	2.8	0.979796	27.6076	14.7021	21.268	12.8232	1.07	0.635295	1.2155	0.241041	193	53.5686	1.072	0.557939	2.554	1.11495	104.383	44.8231	5.5e-08	7.81e-08	26.2159	38.7934	996.52	1390.44	536.786	830.308	537.36	844.944	5.1592	8.8581	1001.74	388.215
279	LaAlO3	-3.70014	4.2508	4.52051	14	942.809	16.2477	7.93889	7.36761	90	97.218	90	60	18.8	19.1979	12.8	5.03587	3.4	2.33238	42.777	48.252	16.894	3.95941	1	0.537587	1.1254	0.227764	194.6	59.3013	1.02	0.515364	2.606	1.03409	102.008	47.7393	1.28e-07	2.44e-07	49.6159	92.8281	1361.12	1585.34	458.174	500.801	92.76	75.7382	3.5132	4.27469	1010.92	370.181
280	LaAlO3	-3.4242	3.5819	5.74203	1	123.707	10.8764	3.79585	7.02178	118.362	150.773	62.3118	10	18.8	19.1979	12.8	5.03587	3.4	2.33238	42.777	48.252	16.894	3.95941	1	0.537587	1.1254	0.227764	194.6	59.3013	1.02	0.515364	2.606	1.03409	102.008	47.7393	1.28e-07	2.44e-07	49.6159	92.8281	1361.12	1585.34	458.174	500.801	92.76	75.7382	3.5132	4.27469	1010.92	370.181
281	LaAlO3	-3.70075	4.277	4.55569	2	467.764	8.31854	7.926	7.3528	89.6737	96.3413	103.822	30	18.8	19.1979	12.8	5.03587	3.4	2.33238	42.777	48.252	16.894	3.95941	1	0.537587	1.1254	0.227764	194.6	59.3013	1.02	0.515364	2.606	1.03409	102.008	47.7393	1.28e-07	2.44e-07	49.6159	92.8281	1361.12	1585.34	458.174	500.801	92.76	75.7382	3.5132	4.27469	1010.92	370.181
282	LaAlO3	-3.72905	3.4925	6.41755	221	110.686	5.38926	5.38926	5.38926	60.0019	60.0019	60.0019	10	18.8	19.1979	12.8	5.03587	3.4	2.33238	42.777	48.252	16.894	3.95941	1	0.537587	1.1254	0.227764	194.6	59.3013	1.02	0.515364	2.606	1.03409	102.008	47.7393	1.28e-07	2.44e-07	49.6159	92.8281	1361.12	1585.34	458.174	500.801	92.76	75.7382	3.5132	4.27469	1010.92	370.181
283	LaAlO3	-3.7358	4.0189	6.37151	167	111.485	5.39321	5.39321	5.39321	60.2232	60.2232	60.2232	10	18.8	19.1979	12.8	5.03587	3.4	2.33238	42.777	48.252	16.894	3.95941	1	0.537587	1.1254	0.227764	194.6	59.3013	1.02	0.515364	2.606	1.03409	102.008	47.7393	1.28e-07	2.44e-07	49.6159	92.8281	1361.12	1585.34	458.174	500.801	92.76	75.7382	3.5132	4.27469	1010.92	370.181
284	LaAlO3	-3.73519	3.7452	6.37109	74	111.493	5.39873	5.39873	5.39873	90.2354	119.782	119.947	10	18.8	19.1979	12.8	5.03587	3.4	2.33238	42.777	48.252	16.894	3.95941	1	0.537587	1.1254	0.227764	194.6	59.3013	1.02	0.515364	2.606	1.03409	102.008	47.7393	1.28e-07	2.44e-07	49.6159	92.8281	1361.12	1585.34	458.174	500.801	92.76	75.7382	3.5132	4.27469	1010.92	370.181
285	LaAlO3	-3.73491	3.5544	6.37156	140	111.484	5.3883	5.3883	5.40935	119.871	119.871	90	10	18.8	19.1979	12.8	5.03587	3.4	2.33238	42.777	48.252	16.894	3.95941	1	0.537587	1.1254	0.227764	194.6	59.3013	1.02	0.515364	2.606	1.03409	102.008	47.7393	1.28e-07	2.44e-07	49.6159	92.8281	1361.12	1585.34	458.174	500.801	92.76	75.7382	3.5132	4.27469	1010.92	370.181
286	LaBiO3	-2.74006	2.6285	7.43853	148	176.75	6.30052	6.29806	6.30052	120.013	60	120.013	10	32.8	31.4668	13.2	5.11468	4	2.52982	79.1768	80.4868	19.156	2.226	1.07	0.586174	1.1974	0.0880627	205.6	68.3333	1.072	0.54708	2.688	0.965865	111.84	38.4841	3.83e-07	5.17e-07	4.21595	5.369	1170.12	1453.49	380.36	448.388	92.76	75.7382	3.5532	4.34216	1036.02	343.214
287	LaBiO3	-2.74567	3.07	7.53704	161	174.44	6.27184	6.27184	6.27184	59.9976	59.9976	59.9976	10	32.8	31.4668	13.2	5.11468	4	2.52982	79.1768	80.4868	19.156	2.226	1.07	0.586174	1.1974	0.0880627	205.6	68.3333	1.072	0.54708	2.688	0.965865	111.84	38.4841	3.83e-07	5.17e-07	4.21595	5.369	1170.12	1453.49	380.36	448.388	92.76	75.7382	3.5532	4.34216	1036.02	343.214
288	LaCoO3	-1.20664	0.0292	4.64524	221	87.8796	4.44593	4.44593	4.44593	90	90	90	5	21.6	19.1687	12	5.25357	3.6	2.33238	49.1674	47.8511	16.228	5.16081	1.02	0.54827	1.14407	0.190933	197.6	61.115	1.008	0.51078	2.66	0.986631	106.43	42.7133	1.35e-07	2.41e-07	22.6159	39.0169	1442.72	1665.37	625.08	721.728	92.76	75.7382	4.6132	6.23891	1047.5	332.682
289	LaCoO3	-2.55088	0.4388	7.34162	221	55.6037	3.81682	3.81682	3.81682	90	90	90	5	21.6	19.1687	12	5.25357	3.6	2.33238	49.1674	47.8511	16.228	5.16081	1.02	0.54827	1.14407	0.190933	197.6	61.115	1.008	0.51078	2.66	0.986631	106.43	42.7133	1.35e-07	2.41e-07	22.6159	39.0169	1442.72	1665.37	625.08	721.728	92.76	75.7382	4.6132	6.23891	1047.5	332.682
290	LaCoO3	-2.63535	0.0367	6.94837	167	117.501	5.4658	5.4658	5.4658	60.7823	60.7823	60.7823	10	21.6	19.1687	12	5.25357	3.6	2.33238	49.1674	47.8511	16.228	5.16081	1.02	0.54827	1.14407	0.190933	197.6	61.115	1.008	0.51078	2.66	0.986631	106.43	42.7133	1.35e-07	2.41e-07	22.6159	39.0169	1442.72	1665.37	625.08	721.728	92.76	75.7382	4.6132	6.23891	1047.5	332.682
291	LaCrO3	-3.18943	2.2627	6.43906	62	246.435	5.61169	5.56728	7.88797	90	90	90	20	21	19.0368	11.4	5.71314	3.6	2.33238	47.78	47.648	16.34	4.95411	1.03	0.554617	1.1784	0.123977	198.6	61.8372	1.032	0.521014	2.616	1.02461	106.516	42.6285	1.48e-07	2.38e-07	21.4159	36.6382	1391.52	1613.69	707.48	858.14	92.76	75.7382	5.4732	7.86204	1026	353.371
292	LaCrO3	-3.18042	2.2693	6.47646	167	122.506	5.52897	5.52897	5.52897	61.1124	61.1124	61.1124	10	21	19.0368	11.4	5.71314	3.6	2.33238	47.78	47.648	16.34	4.95411	1.03	0.554617	1.1784	0.123977	198.6	61.8372	1.032	0.521014	2.616	1.02461	106.516	42.6285	1.48e-07	2.38e-07	21.4159	36.6382	1391.52	1613.69	707.48	858.14	92.76	75.7382	5.4732	7.86204	1026	353.371
293	LaCrO3	-3.10395	1.9039	6.54986	221	60.5666	3.92715	3.92715	3.92715	90	90	90	5	21	19.0368	11.4	5.71314	3.6	2.33238	47.78	47.648	16.34	4.95411	1.03	0.554617	1.1784	0.123977	198.6	61.8372	1.032	0.521014	2.616	1.02461	106.516	42.6285	1.48e-07	2.38e-07	21.4159	36.6382	1391.52	1613.69	707.48	858.14	92.76	75.7382	5.4732	7.86204	1026	353.371
294	LaCrO3	-3.10424	2.3172	6.56011	221	60.4719	3.9251	3.9251	3.9251	90	90	90	5	21	19.0368	11.4	5.71314	3.6	2.33238	47.78	47.648	16.34	4.95411	1.03	0.554617	1.1784	0.123977	198.6	61.8372	1.032	0.521014	2.616	1.02461	106.516	42.6285	1.48e-07	2.38e-07	21.4159	36.6382	1391.52	1613.69	707.48	858.14	92.76	75.7382	5.4732	7.86204	1026	353.371
295	LaDyO3	-3.91711	4.3626	7.43168	33	312.284	6.1279	5.94161	8.57698	90	90	90	20	29.4	26.3636	12.6	5.04381	4.4	2.93939	69.8807	66.4114	18.696	1.95443	1.1	0.61563	1.2166	0.0547123	205.8	68.5519	1.132	0.604199	2.528	1.11761	93.6556	59.7034	3.08e-07	3.9e-07	4.81595	5.89975	1370.72	1594.09	607.48	694.19	92.76	75.7382	3.5932	4.41004	1010.02	371.237
296	LaErO3	-3.95239	4.3945	7.73614	62	304.08	5.87709	6.07692	8.51415	90	90	90	20	29.8	26.9251	13	5.05964	4.4	2.93939	70.8325	67.7525	18.586	1.94913	1.1	0.61563	1.1964	0.0899102	205.4	68.1164	1.126	0.597649	2.532	1.11295	93.6556	59.7034	2.95e-07	3.7e-07	5.61595	6.8747	1430.92	1653.04	631.88	732.544	92.76	75.7382	5.3532	7.63301	1013.28	367.437
297	LaFeO3	-2.66912	1.7426	4.83629	31	333.391	5.66234	6.45289	9.1244	90.0244	89.9954	89.9991	20	21.4	19.1165	11.8	5.38145	3.6	2.33238	48.5497	47.7409	16.312	5.00564	1.03	0.554617	1.1609	0.157922	198.4	61.6882	1.02	0.515364	2.65	0.994706	96.5694	55.2509	1.43e-07	2.39e-07	18.6159	31.1006	1429.52	1651.59	633.68	735.422	92.76	75.7382	4.1332	5.35931	1047.92	332.32
298	LaFeO3	-2.93584	1.514	6.39993	62	251.936	5.60081	5.66192	7.94467	90	90	90	20	21.4	19.1165	11.8	5.38145	3.6	2.33238	48.5497	47.7409	16.312	5.00564	1.03	0.554617	1.1609	0.157922	198.4	61.6882	1.02	0.515364	2.65	0.994706	96.5694	55.2509	1.43e-07	2.39e-07	18.6159	31.1006	1429.52	1651.59	633.68	735.422	92.76	75.7382	4.1332	5.35931	1047.92	332.32
299	LaFeO3	-2.83388	0.8484	6.50504	221	61.9664	3.95854	3.9565	3.9565	90	90	90	5	21.4	19.1165	11.8	5.38145	3.6	2.33238	48.5497	47.7409	16.312	5.00564	1.03	0.554617	1.1609	0.157922	198.4	61.6882	1.02	0.515364	2.65	0.994706	96.5694	55.2509	1.43e-07	2.39e-07	18.6159	31.1006	1429.52	1651.59	633.68	735.422	92.76	75.7382	4.1332	5.35931	1047.92	332.32
300	LaFeO3	-2.92357	1.4445	6.44647	167	125.059	5.57962	5.57962	5.57962	60.8052	60.8052	60.8052	10	21.4	19.1165	11.8	5.38145	3.6	2.33238	48.5497	47.7409	16.312	5.00564	1.03	0.554617	1.1609	0.157922	198.4	61.6882	1.02	0.515364	2.65	0.994706	96.5694	55.2509	1.43e-07	2.39e-07	18.6159	31.1006	1429.52	1651.59	633.68	735.422	92.76	75.7382	4.1332	5.35931	1047.92	332.32
301	LaGaO3	-3.10983	3.5835	6.96371	62	244.777	5.5592	5.58869	7.87857	90	90	90	20	22.4	19.4587	12.8	5.03587	3.6	2.33238	51.3253	48.482	17.254	3.35137	1.01	0.542586	1.1424	0.194214	196	60.0799	1.018	0.514525	2.646	0.99803	101.954	47.8081	1.51e-07	2.38e-07	8.41595	11.453	1298.12	1532.61	332.062	441.064	92.76	75.7382	2.4912	2.78588	1011.18	369.876
302	LaGaO3	-3.10485	3.1939	7.00401	74	243.368	5.53979	5.59392	7.85333	90	90	90	20	22.4	19.4587	12.8	5.03587	3.6	2.33238	51.3253	48.482	17.254	3.35137	1.01	0.542586	1.1424	0.194214	196	60.0799	1.018	0.514525	2.646	0.99803	101.954	47.8081	1.51e-07	2.38e-07	8.41595	11.453	1298.12	1532.61	332.062	441.064	92.76	75.7382	2.4912	2.78588	1011.18	369.876
303	LaGaO3	-3.10421	3.3763	7.00715	167	121.63	5.52859	5.52859	5.52859	60.7942	60.7942	60.7942	10	22.4	19.4587	12.8	5.03587	3.6	2.33238	51.3253	48.482	17.254	3.35137	1.01	0.542586	1.1424	0.194214	196	60.0799	1.018	0.514525	2.646	0.99803	101.954	47.8081	1.51e-07	2.38e-07	8.41595	11.453	1298.12	1532.61	332.062	441.064	92.76	75.7382	2.4912	2.78588	1011.18	369.876
304	LaGaO3	-3.10384	3.3743	7.00361	161	121.691	5.52989	5.52989	5.52989	60.7851	60.7851	60.7851	10	22.4	19.4587	12.8	5.03587	3.6	2.33238	51.3253	48.482	17.254	3.35137	1.01	0.542586	1.1424	0.194214	196	60.0799	1.018	0.514525	2.646	0.99803	101.954	47.8081	1.51e-07	2.38e-07	8.41595	11.453	1298.12	1532.61	332.062	441.064	92.76	75.7382	2.4912	2.78588	1011.18	369.876
305	LaHoO3	-3.88836	4.0247	7.47861	14	312.483	6.03315	8.51063	6.08585	90	90	90.143	20	29.6	26.6428	12.8	5.03587	4.4	2.93939	70.3668	67.0928	18.642	1.94873	1.1	0.61563	1.1986	0.0858548	206.2	68.9939	1.13	0.601997	2.53	1.11528	93.6556	59.7034	2.86e-07	3.56e-07	5.81595	7.15368	1401.32	1623.21	618.28	711.008	92.76	75.7382	4.7732	6.53713	1011.62	369.363
306	LaHoO3	-3.93545	4.3855	7.6233	62	306.552	6.07552	8.57597	5.88352	90	90	90	20	29.6	26.6428	12.8	5.03587	4.4	2.93939	70.3668	67.0928	18.642	1.94873	1.1	0.61563	1.1986	0.0858548	206.2	68.9939	1.13	0.601997	2.53	1.11528	93.6556	59.7034	2.86e-07	3.56e-07	5.81595	7.15368	1401.32	1623.21	618.28	711.008	92.76	75.7382	4.7732	6.53713	1011.62	369.363
307	LaInO3	-2.94892	2.7507	6.91939	62	289.633	5.77123	6.0091	8.3516	90	90	90	20	26	22.1901	12.8	5.03587	3.8	2.4	60.3443	54.8428	18.046	2.25867	1.06	0.577408	1.1784	0.123977	198.2	61.5415	1.056	0.535373	2.64	1.00312	99.4356	51.1416	1.39e-07	2.4e-07	19.0159	31.8903	1271.72	1513.08	357.43	442.304	92.76	75.7382	2.0252	2.39618	1007.08	374.728
308	LaLuO3	-4.00192	4.4525	8.1961	62	293.262	5.818	6.01446	8.38078	90	90	90	20	30.4	27.7892	13.6	5.31413	4.4	2.93939	72.3741	69.9801	18.45	1.9767	1.1	0.61563	1.1906	0.10074	202.2	64.8827	1.12	0.59127	2.538	1.10603	100.218	50.0759	2.39e-07	2.93e-07	5.81595	7.15368	1537.72	1772.97	656.48	772.406	92.76	75.7382	5.7732	8.43728	1000.12	383.226
309	LaMnO3	-2.7251	0.9616	4.81952	14	333.301	6.04319	6.78686	10.2979	90	90	52.1054	20	21.2	19.0725	11.6	5.53534	3.6	2.33238	48.3683	47.7145	16.364	4.91001	1.03	0.554617	1.12007	0.238316	198.6	61.8372	1.03	0.52	2.594	1.04586	93.6556	59.7034	4.11e-07	5.67e-07	4.17595	5.34134	1269.52	1511.53	575.28	645.737	92.76	75.7382	4.0132	5.14391	1038.88	340.476
310	LaMnO3	-2.72633	1.3151	4.84159	14	331.782	6.22912	6.21691	10.4857	90	90	54.7916	20	21.2	19.0725	11.6	5.53534	3.6	2.33238	48.3683	47.7145	16.364	4.91001	1.03	0.554617	1.12007	0.238316	198.6	61.8372	1.03	0.52	2.594	1.04586	93.6556	59.7034	4.11e-07	5.67e-07	4.17595	5.34134	1269.52	1511.53	575.28	645.737	92.76	75.7382	4.0132	5.14391	1038.88	340.476
311	LaMnO3	-3.0107	0.0503	6.42502	15	125.007	5.53914	5.63363	5.63363	60.9394	59.9166	59.9166	10	21.2	19.0725	11.6	5.53534	3.6	2.33238	48.3683	47.7145	16.364	4.91001	1.03	0.554617	1.12007	0.238316	198.6	61.8372	1.03	0.52	2.594	1.04586	93.6556	59.7034	4.11e-07	5.67e-07	4.17595	5.34134	1269.52	1511.53	575.28	645.737	92.76	75.7382	4.0132	5.14391	1038.88	340.476
312	LaMnO3	-2.94347	0.3843	6.54216	221	61.3845	3.94475	3.94475	3.94475	90	90	90	5	21.2	19.0725	11.6	5.53534	3.6	2.33238	48.3683	47.7145	16.364	4.91001	1.03	0.554617	1.12007	0.238316	198.6	61.8372	1.03	0.52	2.594	1.04586	93.6556	59.7034	4.11e-07	5.67e-07	4.17595	5.34134	1269.52	1511.53	575.28	645.737	92.76	75.7382	4.0132	5.14391	1038.88	340.476
313	LaMnO3	-3.00953	0.0638	6.44287	167	124.661	5.56397	5.56397	5.56397	61.044	61.044	61.044	10	21.2	19.0725	11.6	5.53534	3.6	2.33238	48.3683	47.7145	16.364	4.91001	1.03	0.554617	1.12007	0.238316	198.6	61.8372	1.03	0.52	2.594	1.04586	93.6556	59.7034	4.11e-07	5.67e-07	4.17595	5.34134	1269.52	1511.53	575.28	645.737	92.76	75.7382	4.0132	5.14391	1038.88	340.476
314	LaMnO3	-3.02113	0.2501	6.3214	62	254.113	5.59554	5.83124	7.78797	90	90	90	20	21.2	19.0725	11.6	5.53534	3.6	2.33238	48.3683	47.7145	16.364	4.91001	1.03	0.554617	1.12007	0.238316	198.6	61.8372	1.03	0.52	2.594	1.04586	93.6556	59.7034	4.11e-07	5.67e-07	4.17595	5.34134	1269.52	1511.53	575.28	645.737	92.76	75.7382	4.0132	5.14391	1038.88	340.476
315	LaRhO3	-2.55741	0.594	7.4642	62	257.892	5.52133	5.87863	7.94544	90	90	90	20	25.2	21.4047	12	5.25357	3.8	2.4	57.9618	52.639	16.55	4.57093	1.02	0.54827	1.1394	0.200124	198.4	61.6882	1.04	0.525357	2.74	0.935008	115.596	37.1528	1.32e-07	2.42e-07	32.6159	58.9067	1596.32	1845.98	718.88	877.78	92.76	75.7382	5.7132	8.32195	1039.36	340.024
316	LaScO3	-3.96409	3.8831	5.67044	62	271.592	5.70557	5.83692	8.15521	90	90	90	20	20.4	18.98	10.8	6.36867	3.6	2.33238	46.3719	47.6066	17.894	2.42671	1.07	0.586174	1.1674	0.145255	201.2	63.97	1.09	0.562139	2.556	1.08579	97.2756	54.2111	2.33e-07	2.86e-07	5.81595	7.15368	1423.32	1645.23	634.28	736.383	92.76	75.7382	4.5732	6.16469	1022.02	357.638
317	LaScO3	-3.75981	2.813	5.67339	221	67.8628	4.07891	4.07891	4.07891	90	90	90	5	20.4	18.98	10.8	6.36867	3.6	2.33238	46.3719	47.6066	17.894	2.42671	1.07	0.586174	1.1674	0.145255	201.2	63.97	1.09	0.562139	2.556	1.08579	97.2756	54.2111	2.33e-07	2.86e-07	5.81595	7.15368	1423.32	1645.23	634.28	736.383	92.76	75.7382	4.5732	6.16469	1022.02	357.638
318	LaSmO3	-3.81567	4.2435	6.84594	33	327.224	6.2145	6.03018	8.73191	90	90	90	20	28.6	25.2792	11.8	5.38145	4.4	2.93939	67.4527	63.1212	18.89	2.02291	1.12	0.637652	1.2362	0.0342719	207	69.8971	1.142	0.61548	2.518	1.12943	93.6556	59.7034	3.11e-07	3.95e-07	5.21595	6.35565	1217.92	1478.35	540.48	596.773	92.76	75.7382	3.0932	3.59746	1004.32	378.06
319	LaTmO3	-3.97634	4.414	7.87466	62	300.144	5.85709	6.05144	8.46815	90	90	90	20	30	27.2103	13.2	5.11468	4.4	2.93939	71.1676	68.231	18.714	1.95765	1.1	0.61563	1.2094	0.0665841	205.6	68.3333	1.126	0.597649	2.534	1.11063	113.512	37.713	2.58e-07	3.17e-07	6.01595	7.44371	1247.32	1496.47	635.08	737.665	92.76	75.7382	4.7332	6.46238	1014.76	365.738
320	LaVO3	-3.28011	1.4702	6.25227	14	252.677	5.61323	5.73309	7.85174	90.1757	90	90	20	20.8	19.0095	11.2	5.9127	3.6	2.33238	47.569	47.6312	16.558	4.55646	1.02	0.54827	1.1459	0.187327	198	61.3971	1.06	0.538145	2.61	1.03026	103.776	45.5912	1.63e-07	2.39e-07	8.81595	12.177	1538.72	1774.18	708.08	859.169	92.76	75.7382	5.9332	8.74544	1025.6	353.794
321	LaVO3	-3.1103	0.0206	6.40248	221	61.6872	3.95122	3.95122	3.95122	90	90	90	5	20.8	19.0095	11.2	5.9127	3.6	2.33238	47.569	47.6312	16.558	4.55646	1.02	0.54827	1.1459	0.187327	198	61.3971	1.06	0.538145	2.61	1.03026	103.776	45.5912	1.63e-07	2.39e-07	8.81595	12.177	1538.72	1774.18	708.08	859.169	92.76	75.7382	5.9332	8.74544	1025.6	353.794
322	LaYO3	-3.89852	4.3416	5.87277	62	311.943	5.91593	6.12356	8.6109	90	90	90	20	24	20.4059	10.8	6.36867	3.8	2.4	55.1619	50.503	18.87	2.0125	1.11	0.626418	1.1984	0.086222	204.6	67.2654	1.124	0.595503	2.528	1.11761	99.5798	50.9432	2.43e-07	2.98e-07	6.01595	7.44371	1524.52	1757.19	631.28	731.586	92.76	75.7382	3.6532	4.51262	1015.42	364.985
323	LiAsO3	-2.00177	3.3858	4.30038	148	100.288	5.59387	5.59387	5.59387	51.9315	51.9315	51.9315	10	12	10.6771	12.8	5.9127	2.4	0.8	25.9722	24.7249	15.61	2.14342	0.88	0.355809	1.068	0.247095	170	25.6437	0.884	0.300506	2.696	0.987068	112.026	35.907	8.5e-08	1.28e-07	27.0159	34.8588	554.52	613.505	341.618	404.828	1077.36	1228.49	6.2732	10.7673	1081.2	314.372
324	LiAsO3	-1.96373	2.9408	3.45618	15	249.569	5.35775	7.08408	7.08408	84.9978	74.4718	74.4718	20	12	10.6771	12.8	5.9127	2.4	0.8	25.9722	24.7249	15.61	2.14342	0.88	0.355809	1.068	0.247095	170	25.6437	0.884	0.300506	2.696	0.987068	112.026	35.907	8.5e-08	1.28e-07	27.0159	34.8588	554.52	613.505	341.618	404.828	1077.36	1228.49	6.2732	10.7673	1081.2	314.372
325	LiBiO3	-1.64878	0.1445	7.04885	56	497.385	5.03732	9.02076	10.9459	90	90	90	40	22	30.5614	12.8	5.9127	2.8	1.6	52.7839	78.177	17.282	2.62327	0.97	0.455631	1.143	0.149519	188.4	51.7131	0.944	0.377656	2.664	1.0057	114.697	33.6718	2.79e-07	5.12e-07	18.6159	33.3354	744.52	804.444	232.498	219.517	737.36	1244.26	2.9132	4.1358	1032.4	348.502
326	LiIO3	-1.39926	3.7255	3.89315	86	620.492	6.22731	9.98201	9.98201	90	90	90	40	16	18.6011	13.2	6.11228	2.6	1.2	36.3687	45.4036	18.164	4.13505	0.93	0.404475	1.19067	0.145425	173.2	28.5265	0.916	0.338562	2.792	0.955037	155.543	76.5846	200000000000000	400000000000000	17.1057	33.9475	468.6	590.579	200.988	180.286	901.16	1189.1	2.2852	2.94125	1093.48	310.06
327	LiIO3	-1.39017	3.6522	4.30079	173	140.42	5.54002	5.54001	5.28296	90	89.9999	120	10	16	18.6011	13.2	6.11228	2.6	1.2	36.3687	45.4036	18.164	4.13505	0.93	0.404475	1.19067	0.145425	173.2	28.5265	0.916	0.338562	2.792	0.955037	155.543	76.5846	200000000000000	400000000000000	17.1057	33.9475	468.6	590.579	200.988	180.286	901.16	1189.1	2.2852	2.94125	1093.48	310.06
328	LiIO3	-1.39453	3.6546	3.97904	33	303.549	5.4077	5.93042	9.46521	90	90	90	20	16	18.6011	13.2	6.11228	2.6	1.2	36.3687	45.4036	18.164	4.13505	0.93	0.404475	1.19067	0.145425	173.2	28.5265	0.916	0.338562	2.792	0.955037	155.543	76.5846	200000000000000	400000000000000	17.1057	33.9475	468.6	590.579	200.988	180.286	901.16	1189.1	2.2852	2.94125	1093.48	310.06
329	LiNO3	-1.47425	2.9369	2.2673	167	100.99	5.82632	5.82632	5.82632	48.2743	48.2743	48.2743	10	6.8	1.93907	12.8	5.9127	2	0	13.7892	3.50999	15.728	2.00554	0.78	0.335559	1.062	0.257091	165.6	24.0133	0.786	0.258426	2.868	0.956627	96.5122	57.6295	1.9e-08	3.8e-08	17.0211	33.9894	392.592	611.224	136.228	158.763	762.6	1230.25	0.8052	1.0987	1172.2	327.917
330	LiNbO3	-2.90306	3.0381	4.40949	1	445.409	5.58865	5.58155	22.3675	55.8011	55.7709	55.8532	40	13.6	13.8362	10.8	6.49307	2.6	1.2	29.5691	31.8624	15.186	2.75119	0.94	0.416413	1.1	0.197585	183.6	43.4401	0.956	0.395656	2.58	1.07137	114.188	34.0442	4.94e-08	6.31e-08	27.8159	35.4185	1380.52	1911.74	673.618	1049.62	737.36	1244.26	6.0932	10.4092	1022.22	358.573
331	LiNbO3	-2.8778	3.4191	3.88172	9	252.984	5.27535	5.67376	10.0454	93.6288	91.9505	57.4687	20	13.6	13.8362	10.8	6.49307	2.6	1.2	29.5691	31.8624	15.186	2.75119	0.94	0.416413	1.1	0.197585	183.6	43.4401	0.956	0.395656	2.58	1.07137	114.188	34.0442	4.94e-08	6.31e-08	27.8159	35.4185	1380.52	1911.74	673.618	1049.62	737.36	1244.26	6.0932	10.4092	1022.22	358.573
332	LiNbO3	-2.86739	3.456	3.92763	1	125.013	6.35046	5.50293	10.3584	82.9409	157.034	106.756	10	13.6	13.8362	10.8	6.49307	2.6	1.2	29.5691	31.8624	15.186	2.75119	0.94	0.416413	1.1	0.197585	183.6	43.4401	0.956	0.395656	2.58	1.07137	114.188	34.0442	4.94e-08	6.31e-08	27.8159	35.4185	1380.52	1911.74	673.618	1049.62	737.36	1244.26	6.0932	10.4092	1022.22	358.573
333	LiNbO3	-2.88054	2.3243	4.40593	167	111.442	5.54373	5.54373	5.54374	56.7526	56.7526	56.7526	10	13.6	13.8362	10.8	6.49307	2.6	1.2	29.5691	31.8624	15.186	2.75119	0.94	0.416413	1.1	0.197585	183.6	43.4401	0.956	0.395656	2.58	1.07137	114.188	34.0442	4.94e-08	6.31e-08	27.8159	35.4185	1380.52	1911.74	673.618	1049.62	737.36	1244.26	6.0932	10.4092	1022.22	358.573
334	LiNbO3	-2.90588	2.9835	4.39774	1	669.899	5.58892	5.58411	33.5297	55.9135	55.9013	55.9323	60	13.6	13.8362	10.8	6.49307	2.6	1.2	29.5691	31.8624	15.186	2.75119	0.94	0.416413	1.1	0.197585	183.6	43.4401	0.956	0.395656	2.58	1.07137	114.188	34.0442	4.94e-08	6.31e-08	27.8159	35.4185	1380.52	1911.74	673.618	1049.62	737.36	1244.26	6.0932	10.4092	1022.22	358.573
335	LiNbO3	-2.88499	2.7432	4.39048	57	447.338	5.56891	15.1491	5.30248	90	90	90	40	13.6	13.8362	10.8	6.49307	2.6	1.2	29.5691	31.8624	15.186	2.75119	0.94	0.416413	1.1	0.197585	183.6	43.4401	0.956	0.395656	2.58	1.07137	114.188	34.0442	4.94e-08	6.31e-08	27.8159	35.4185	1380.52	1911.74	673.618	1049.62	737.36	1244.26	6.0932	10.4092	1022.22	358.573
336	LiNbO3	-2.90715	3.0231	4.41598	1	778.32	5.58378	5.57961	39.0887	55.8501	55.833	55.8725	70	13.6	13.8362	10.8	6.49307	2.6	1.2	29.5691	31.8624	15.186	2.75119	0.94	0.416413	1.1	0.197585	183.6	43.4401	0.956	0.395656	2.58	1.07137	114.188	34.0442	4.94e-08	6.31e-08	27.8159	35.4185	1380.52	1911.74	673.618	1049.62	737.36	1244.26	6.0932	10.4092	1022.22	358.573
337	LiNbO3	-2.90383	2.9621	4.38456	1	559.927	5.58868	5.5834	27.9329	56.0458	56.0446	56.0578	50	13.6	13.8362	10.8	6.49307	2.6	1.2	29.5691	31.8624	15.186	2.75119	0.94	0.416413	1.1	0.197585	183.6	43.4401	0.956	0.395656	2.58	1.07137	114.188	34.0442	4.94e-08	6.31e-08	27.8159	35.4185	1380.52	1911.74	673.618	1049.62	737.36	1244.26	6.0932	10.4092	1022.22	358.573
338	LiNbO3	-2.8937	3.7461	4.18902	148	117.213	5.28485	5.28485	5.72654	62.5203	62.5203	60	10	13.6	13.8362	10.8	6.49307	2.6	1.2	29.5691	31.8624	15.186	2.75119	0.94	0.416413	1.1	0.197585	183.6	43.4401	0.956	0.395656	2.58	1.07137	114.188	34.0442	4.94e-08	6.31e-08	27.8159	35.4185	1380.52	1911.74	673.618	1049.62	737.36	1244.26	6.0932	10.4092	1022.22	358.573
339	LiNbO3	-2.91401	3.3358	4.41287	161	111.267	5.5924	5.5924	5.5924	55.6759	55.6759	55.6759	10	13.6	13.8362	10.8	6.49307	2.6	1.2	29.5691	31.8624	15.186	2.75119	0.94	0.416413	1.1	0.197585	183.6	43.4401	0.956	0.395656	2.58	1.07137	114.188	34.0442	4.94e-08	6.31e-08	27.8159	35.4185	1380.52	1911.74	673.618	1049.62	737.36	1244.26	6.0932	10.4092	1022.22	358.573
340	LiPO3	-2.71899	5.5752	2.35389	7	1212.14	5.51205	13.3012	16.7562	99.3659	90	90	100	8.4	3.82623	12.8	5.9127	2.2	0.4	17.1826	7.73675	16.424	1.70709	0.85	0.337639	1.046	0.284507	170.4	25.9353	0.862	0.279886	2.698	0.98603	110.92	37.0198	3.9e-08	4.78e-08	17.0631	33.9685	487.12	591.389	187.078	167.65	936.16	1188.74	0.8612	1.08158	1094	309.919
341	LiSbO3	-2.13373	2.1379	5.18196	52	226.49	4.99199	5.27028	8.60879	90	90	90	20	15.6	17.8056	12.8	5.9127	2.6	1.2	35.3398	43.3523	16.658	1.84719	0.94	0.416413	1.102	0.194772	181.8	40.489	0.924	0.349262	2.67	1.00192	116.697	32.4761	9.9e-08	1.55e-07	21.8159	32.9282	749.12	810.719	304.374	337.178	737.36	1244.26	4.6732	7.59004	1058.6	327.015
342	LiSbO3	-2.04482	1.1945	5.37776	198	218.244	6.0207	6.0207	6.0207	90	90	90	20	15.6	17.8056	12.8	5.9127	2.6	1.2	35.3398	43.3523	16.658	1.84719	0.94	0.416413	1.102	0.194772	181.8	40.489	0.924	0.349262	2.67	1.00192	116.697	32.4761	9.9e-08	1.55e-07	21.8159	32.9282	749.12	810.719	304.374	337.178	737.36	1244.26	4.6732	7.59004	1058.6	327.015
343	LiSbO3	-2.09514	2.7496	4.74915	1	123.566	6.29193	5.40598	10.3303	83.5812	156.389	106.789	10	15.6	17.8056	12.8	5.9127	2.6	1.2	35.3398	43.3523	16.658	1.84719	0.94	0.416413	1.102	0.194772	181.8	40.489	0.924	0.349262	2.67	1.00192	116.697	32.4761	9.9e-08	1.55e-07	21.8159	32.9282	749.12	810.719	304.374	337.178	737.36	1244.26	4.6732	7.59004	1058.6	327.015
344	LiTaO3	-3.0561	2.3884	6.70318	127	116.87	5.44454	5.44448	3.94262	90	90	90	10	20	26.5707	10.8	6.49307	2.8	1.6	47.1774	66.9772	15.19	2.74486	0.94	0.416413	1.1	0.197585	183.8	43.774	0.96	0.401796	2.56	1.09025	102.726	47.7097	4.6e-08	5.77e-08	28.4159	35.8794	1523.32	2185.15	781.618	1263.67	737.36	1244.26	7.9332	14.0746	1044	338.156
345	LiTaO3	-3.14432	3.7003	7.17837	161	109.133	5.53382	5.53382	5.53382	56.1449	56.1449	56.1449	10	20	26.5707	10.8	6.49307	2.8	1.6	47.1774	66.9772	15.19	2.74486	0.94	0.416413	1.1	0.197585	183.8	43.774	0.96	0.401796	2.56	1.09025	102.726	47.7097	4.6e-08	5.77e-08	28.4159	35.8794	1523.32	2185.15	781.618	1263.67	737.36	1244.26	7.9332	14.0746	1044	338.156
346	LiUO3	-3.35375	0.41	7.45234	161	130.559	5.93316	5.93316	5.93316	55.015	55.015	55.015	10	23.8	34.1549	11	6.32456	3.4	2.8	58.5936	89.7862	15.518	2.2622	1	0.498999	1.13425	0.156692	193.4	60.7473	1.01	0.483156	2.536	1.11437	96.5122	57.6295	7.5e-08	1.09e-07	22.4159	32.9898	1217.12	1604.1	404.678	523.62	737.36	1244.26	3.5332	5.34285	1011.32	370.295
347	LiUO3	-3.14509	0.4136	6.22151	221	78.194	4.27626	4.27627	4.27626	89.6663	89.7095	89.6663	5	23.8	34.1549	11	6.32456	3.4	2.8	58.5936	89.7862	15.518	2.2622	1	0.498999	1.13425	0.156692	193.4	60.7473	1.01	0.483156	2.536	1.11437	96.5122	57.6295	7.5e-08	1.09e-07	22.4159	32.9898	1217.12	1604.1	404.678	523.62	737.36	1244.26	3.5332	5.34285	1011.32	370.295
348	LiVO3	-2.3287	2.0872	3.21185	12	109.481	15.5029	9.96282	9.96282	16.6783	16.556	16.5561	10	10	6.78233	10.8	6.49307	2.4	0.8	21.1761	15.2906	14.684	3.59868	0.92	0.393192	1.0915	0.209974	180.8	38.8968	0.932	0.360355	2.586	1.06594	106.632	42.1593	5.9e-08	7.95e-08	23.2159	33.1394	1113.12	1412.79	560.218	825.968	737.36	1244.26	5.2932	8.81927	1021.98	358.821
349	LiVO3	-2.35456	1.9675	3.25807	1	107.928	5.36633	4.95067	9.82333	87.4109	29.2193	102.65	10	10	6.78233	10.8	6.49307	2.4	0.8	21.1761	15.2906	14.684	3.59868	0.92	0.393192	1.0915	0.209974	180.8	38.8968	0.932	0.360355	2.586	1.06594	106.632	42.1593	5.9e-08	7.95e-08	23.2159	33.1394	1113.12	1412.79	560.218	825.968	737.36	1244.26	5.2932	8.81927	1021.98	358.821
350	LiVO3	-2.41861	3.0342	2.82287	15	249.136	5.94367	6.7724	6.7724	79.1642	73.6003	73.6003	20	10	6.78233	10.8	6.49307	2.4	0.8	21.1761	15.2906	14.684	3.59868	0.92	0.393192	1.0915	0.209974	180.8	38.8968	0.932	0.360355	2.586	1.06594	106.632	42.1593	5.9e-08	7.95e-08	23.2159	33.1394	1113.12	1412.79	560.218	825.968	737.36	1244.26	5.2932	8.81927	1021.98	358.821
351	LiVO3	-2.43874	2.8222	2.39386	9	293.783	5.7976	7.64851	7.64851	83.531	68.5663	68.5663	20	10	6.78233	10.8	6.49307	2.4	0.8	21.1761	15.2906	14.684	3.59868	0.92	0.393192	1.0915	0.209974	180.8	38.8968	0.932	0.360355	2.586	1.06594	106.632	42.1593	5.9e-08	7.95e-08	23.2159	33.1394	1113.12	1412.79	560.218	825.968	737.36	1244.26	5.2932	8.81927	1021.98	358.821
352	LuAlO3	-3.79905	5.7429	8.21625	62	202.061	5.12	5.36179	7.36044	90	90	90	20	21.6	24.7758	15.6	1.35647	3.4	2.33238	49.9893	62.6334	15.972	2.99043	0.96	0.468402	1.0912	0.231015	187.6	47.5924	0.98	0.445421	2.64	0.985677	99.5	50.8763	1.21e-07	2.3e-07	50.2159	92.5989	1347.52	1565.01	604.574	742.759	92.76	75.7382	6.6732	8.67156	1008	373.937
353	LuAlO3	-3.73772	5.0767	8.25991	167	100.497	5.18237	5.18237	5.18237	60.9377	60.9377	60.9377	10	21.6	24.7758	15.6	1.35647	3.4	2.33238	49.9893	62.6334	15.972	2.99043	0.96	0.468402	1.0912	0.231015	187.6	47.5924	0.98	0.445421	2.64	0.985677	99.5	50.8763	1.21e-07	2.3e-07	50.2159	92.5989	1347.52	1565.01	604.574	742.759	92.76	75.7382	6.6732	8.67156	1008	373.937
354	LuBO3	-3.58414	5.3023	6.84012	167	113.505	6.10765	6.10765	6.10765	47.5443	47.5443	47.5443	10	20	25.5265	15.6	1.35647	3.2	2.4	46.7552	64.1374	14.85	5.23253	0.88	0.445646	1.0382	0.329729	181	44.109	0.9	0.427083	2.726	0.907736	96.5454	54.4473	200000000000	400000000000	8.61595	11.08	1629.12	1892.08	887.68	1028.84	92.76	75.7382	14.5332	19.6371	1052.62	330.719
355	LuBiO3	-2.83752	2.3018	9.4016	148	152.583	5.89287	5.89273	6.10802	61.1663	118.832	119.989	10	35.6	34.0153	16	0.632456	4	2.52982	86.3891	86.8778	18.234	1.54658	1.03	0.528772	1.1632	0.119042	198.6	59.7649	1.032	0.486062	2.722	0.910789	109.332	42.8917	3.76e-07	5.14e-07	4.81595	6.38804	1156.52	1429.47	526.76	724.379	92.76	75.7382	6.7132	8.69048	1033.1	347.474
356	LuCoO3	-2.71349	1.4706	9.28004	62	201.768	5.06723	5.45034	7.30564	89.9984	89.9955	89.9991	20	24.4	24.4344	14.8	2.92575	3.6	2.33238	56.3797	61.5811	15.306	4.32106	0.98	0.482286	1.10987	0.198049	190.6	50.2538	0.968	0.439017	2.694	0.933801	103.922	46.4324	1.28e-07	2.27e-07	23.2159	38.8873	1429.12	1646.7	771.48	879.153	92.76	75.7382	7.7732	9.42841	1044.58	337.174
357	LuCrO3	-3.25546	2.5313	8.31543	62	219.632	5.2114	5.56341	7.57531	90	90	90	20	23.8	24.4	14.2	4.11825	3.6	2.33238	54.9923	61.5861	15.418	4.09723	0.99	0.490306	1.1442	0.143131	191.6	51.2664	0.992	0.453008	2.65	0.975377	104.008	46.359	1.41e-07	2.25e-07	22.0159	36.5198	1377.92	1593.98	853.88	981.986	92.76	75.7382	8.6332	10.3125	1023.08	357.428
358	LuFeO3	-2.99146	1.7206	8.25844	62	224.243	5.24099	5.58144	7.66585	90	90	90	20	24.2	24.4164	14.6	3.32265	3.6	2.33238	55.762	61.5679	15.39	4.15319	0.99	0.490306	1.1267	0.169878	191.4	51.0592	0.98	0.445421	2.684	0.94269	94.0614	57.7472	1.36e-07	2.25e-07	19.2159	31.0153	1415.92	1632.66	780.08	889.014	92.76	75.7382	7.2932	9.04029	1045	336.821
359	LuGaO3	-3.17879	3.6376	8.88708	62	218.754	5.20806	5.53821	7.58419	90	90	90	20	25.2	24.5715	15.6	1.35647	3.6	2.33238	58.5376	61.8214	16.332	2.27183	0.97	0.474974	1.1082	0.20093	189	48.7606	0.978	0.44427	2.68	0.94634	99.4456	50.9382	1.44e-07	2.25e-07	9.01595	11.7522	1284.52	1511	478.462	729.624	92.76	75.7382	5.6512	8.43464	1008.26	373.638
360	LuMnO3	-3.07337	0.0586	8.19564	62	225.227	5.24205	5.77809	7.43592	90	90	90	20	24	24.4049	14.4	3.72022	3.6	2.33238	55.5806	61.5687	15.442	4.04927	0.99	0.490306	1.08587	0.240668	191.6	51.2664	0.99	0.451664	2.628	0.998427	91.1476	61.9028	4.04e-07	5.65e-07	4.77595	6.36857	1255.92	1489.36	721.68	826.787	92.76	75.7382	7.1732	8.95672	1035.96	344.794
361	LuNiO3	-2.44114	0.1135	8.89583	14	210.303	5.11981	5.61719	7.31261	90	89.9494	90	20	24.6	24.4589	15	2.52982	3.6	2.33238	56.3317	61.5792	15.29	4.35304	0.98	0.482286	1.1042	0.2079	190.6	50.2538	0.966	0.438068	2.7	0.928633	113.455	41.9035	1.3e-07	2.27e-07	21.4159	35.3378	1426.32	1643.7	763.48	870.185	92.76	75.7382	7.9732	9.61383	1039.92	341.206
362	LuScO3	-3.99754	4.4786	7.32115	14	243.073	5.37916	5.68961	7.94218	90	90.0428	90	20	23.2	24.4246	13.6	5.31413	3.6	2.33238	53.5842	61.7189	16.972	0.999328	1.03	0.528772	1.1332	0.159571	194.2	54.1568	1.05	0.504381	2.59	1.04142	94.7676	56.7844	2.26e-07	2.77e-07	6.41595	7.82535	1409.72	1626.17	780.68	889.71	92.76	75.7382	7.7332	9.39293	1019.1	361.614
363	LuTlO3	-2.5443	0.6919	10.1854	62	278.685	5.80756	8.42578	5.6952	90	90	90	20	35.2	33.4628	15.6	1.35647	4	2.52982	85.4697	85.5904	17.416	0.189905	1.09	0.601997	1.2227	0.114351	194.6	54.6319	1.02	0.474974	2.642	0.983593	98.4226	52.1292	1.46e-07	2.25e-07	12.4159	17.8954	1138.32	1421.25	533.28	724.655	92.76	75.7382	5.3732	8.45496	1010.38	371.218
364	LuVO3	-3.32938	1.6226	8.07727	14	225.241	5.24198	5.65867	7.59342	90	89.9203	90	20	23.6	24.4016	14	4.51664	3.6	2.33238	54.7813	61.5978	15.636	3.66161	0.98	0.482286	1.1117	0.194896	191	50.6518	1.02	0.474974	2.644	0.981521	101.268	48.957	1.56e-07	2.26e-07	9.41595	12.4395	1525.12	1757.41	854.48	982.796	92.76	75.7382	9.0932	10.8679	1022.68	357.843
365	MgCO3	-2.46246	4.9603	2.89897	167	96.5904	5.74482	5.74482	5.74482	48.2061	48.2061	48.2061	10	8.4	1.95959	12.8	5.45527	2.2	0.4	16.8628	4.02903	14.274	4.6767	0.8	0.352136	0.988	0.377274	175.6	39.1234	0.814	0.296081	2.836	0.837248	108.941	54.9756	2.01e-06	4e-06	60.0159	73.7434	1186.72	1632.83	977.48	1450.77	92.76	75.7382	25.2732	45.9808	1152.54	225.283
366	MgCoO3	-1.83871	0.1623	4.35291	15	200.255	6.38268	6.38268	4.96193	93.186	86.814	96.5741	20	12.6	7.36478	11.8	5.6	2.6	0.8	26.2473	16.6565	14.55	4.14934	0.93	0.40694	1.08167	0.220328	188.2	46.9144	0.9	0.325945	2.702	0.921659	97.3602	57.1094	2.08e-08	2.6e-08	52.0159	66.4405	966.72	1220.61	571.08	686.455	92.76	75.7382	5.1132	6.44288	1087.42	276.371
367	MgGeO3	-2.41817	2.4744	5.06729	63	94.9951	2.8517	4.95123	7.02561	90	90	106.737	10	13.6	9.32952	12.8	5.45527	2.6	0.8	28.9886	22.0615	15.942	1.74063	0.91	0.387814	1.082	0.219854	186	44.6363	0.904	0.32946	2.728	0.899675	108.373	54.8547	0.000100009	0.000199996	44.0159	62.4708	945.32	1181.58	459.76	504.288	92.76	75.7382	8.2332	12.2323	1087.74	275.993
368	MgGeO3	-2.55521	3.6483	4.76461	148	101.03	5.47043	5.47043	5.47043	54.5417	54.5417	54.5417	10	13.6	9.32952	12.8	5.45527	2.6	0.8	28.9886	22.0615	15.942	1.74063	0.91	0.387814	1.082	0.219854	186	44.6363	0.904	0.32946	2.728	0.899675	108.373	54.8547	0.000100009	0.000199996	44.0159	62.4708	945.32	1181.58	459.76	504.288	92.76	75.7382	8.2332	12.2323	1087.74	275.993
369	MgGeO3	-2.06203	1.0861	4.68229	221	51.403	3.71817	3.71817	3.71817	90	90	90	5	13.6	9.32952	12.8	5.45527	2.6	0.8	28.9886	22.0615	15.942	1.74063	0.91	0.387814	1.082	0.219854	186	44.6363	0.904	0.32946	2.728	0.899675	108.373	54.8547	0.000100009	0.000199996	44.0159	62.4708	945.32	1181.58	459.76	504.288	92.76	75.7382	8.2332	12.2323	1087.74	275.993
370	MgGeO3	-2.57396	2.9034	4.10448	61	938.228	5.42015	9.07499	19.0744	90	90	90	80	13.6	9.32952	12.8	5.45527	2.6	0.8	28.9886	22.0615	15.942	1.74063	0.91	0.387814	1.082	0.219854	186	44.6363	0.904	0.32946	2.728	0.899675	108.373	54.8547	0.000100009	0.000199996	44.0159	62.4708	945.32	1181.58	459.76	504.288	92.76	75.7382	8.2332	12.2323	1087.74	275.993
371	MgGeO3	-2.57497	2.5261	4.25307	15	226.363	5.23244	6.64848	6.64848	85.9458	81.8758	81.8758	20	13.6	9.32952	12.8	5.45527	2.6	0.8	28.9886	22.0615	15.942	1.74063	0.91	0.387814	1.082	0.219854	186	44.6363	0.904	0.32946	2.728	0.899675	108.373	54.8547	0.000100009	0.000199996	44.0159	62.4708	945.32	1181.58	459.76	504.288	92.76	75.7382	8.2332	12.2323	1087.74	275.993
372	MgMnO3	-2.30206	0.536	4.41955	62	191.231	5.0081	5.22759	7.30441	90	90	90	20	12.2	6.58483	11.4	5.8515	2.6	0.8	25.4482	15.0917	14.686	3.892	0.94	0.417612	1.05767	0.256687	189.2	48.0475	0.922	0.347125	2.636	0.987615	84.5856	69.0639	2.97e-07	5.72e-07	33.5759	63.2837	793.52	914.479	521.28	601.604	92.76	75.7382	4.5132	5.44487	1078.8	286.908
373	MgMnO3	-2.37769	1.93	4.18166	148	101.055	5.46312	5.46312	5.46312	54.6983	54.6983	54.6983	10	12.2	6.58483	11.4	5.8515	2.6	0.8	25.4482	15.0917	14.686	3.892	0.94	0.417612	1.05767	0.256687	189.2	48.0475	0.922	0.347125	2.636	0.987615	84.5856	69.0639	2.97e-07	5.72e-07	33.5759	63.2837	793.52	914.479	521.28	601.604	92.76	75.7382	4.5132	5.44487	1078.8	286.908
374	MgMoO3	-2.45147	1.5123	4.99007	14	223.944	5.27953	5.40317	7.85049	89.9106	89.9985	89.9976	20	15.6	13.2906	11.2	6.01332	2.8	1.16619	33.6486	31.3114	15.092	3.1385	0.95	0.428952	1.083	0.21844	189.2	48.0475	0.956	0.387484	2.758	0.87746	99.0198	56.2259	1.98e-08	2.45e-08	59.8159	73.5272	1309.12	1867.67	796.68	1102.2	92.76	75.7382	9.0732	13.858	1072.2	295.402
375	MgSO3	-2.42599	4.8986	2.7129	14	511.062	8.09344	11.9919	5.34505	90	80.1121	90	40	10.4	3.2	13.2	5.6	2.4	0.489898	20.8736	6.45438	16.322	1.36024	0.86	0.355528	1.104	0.191165	178	39.5019	0.872	0.306098	2.842	0.835282	124.668	66.4482	2e+22	4e+22	32.0569	63.9716	470.294	508.258	295.152	339.467	355.56	482.946	2.2192	3.29261	1135.26	232.909
376	MgSO3	-2.43498	4.9784	2.83973	148	366.177	7.80003	7.80003	7.80003	109.407	109.407	109.407	30	10.4	3.2	13.2	5.6	2.4	0.489898	20.8736	6.45438	16.322	1.36024	0.86	0.355528	1.104	0.191165	178	39.5019	0.872	0.306098	2.842	0.835282	124.668	66.4482	2e+22	4e+22	32.0569	63.9716	470.294	508.258	295.152	339.467	355.56	482.946	2.2192	3.29261	1135.26	232.909
377	MgSeO3	-2.04343	4.0013	4.2513	62	236.331	5.07225	5.9899	7.77858	90	90	90	20	14	10.1193	13.2	5.6	2.6	0.8	30.2526	24.5652	16.5	1.30194	0.89	0.372022	1.13067	0.165656	176.6	39.2102	0.9	0.325945	2.836	0.837248	123.579	65.2314	1.08e-08	1.7e-08	32.1199	63.9403	518.32	539.752	316.28	347.796	445.96	662.73	2.9532	3.50402	1123.54	240.781
378	MgSiO3	-3.16346	4.7719	3.41245	88	781.605	10.051	10.051	10.051	109.249	109.249	109.917	80	10	2.52982	12.8	5.45527	2.4	0.489898	20.0777	5.136	15.628	2.20819	0.88	0.365513	1.036	0.292411	184	42.8532	0.892	0.319399	2.706	0.91812	111.199	55.6839	0.000200009	0.000399996	62.0159	75.987	961.32	1210.74	554.88	658.399	92.76	75.7382	11.9132	19.423	1092.64	270.326
379	MgSiO3	-2.78674	2.0029	3.27058	33	407.755	4.81639	8.82649	9.59158	90	90	90	40	10	2.52982	12.8	5.45527	2.4	0.489898	20.0777	5.136	15.628	2.20819	0.88	0.365513	1.036	0.292411	184	42.8532	0.892	0.319399	2.706	0.91812	111.199	55.6839	0.000200009	0.000399996	62.0159	75.987	961.32	1210.74	554.88	658.399	92.76	75.7382	11.9132	19.423	1092.64	270.326
380	MgSiO3	-3.04022	3.7381	2.98676	61	893.006	5.23957	9.18959	18.5465	90	90	90	80	10	2.52982	12.8	5.45527	2.4	0.489898	20.0777	5.136	15.628	2.20819	0.88	0.365513	1.036	0.292411	184	42.8532	0.892	0.319399	2.706	0.91812	111.199	55.6839	0.000200009	0.000399996	62.0159	75.987	961.32	1210.74	554.88	658.399	92.76	75.7382	11.9132	19.423	1092.64	270.326
381	MgSiO3	-3.21503	4.7095	3.05443	15	218.305	5.28528	6.75913	6.75913	80.9912	72.173	72.173	20	10	2.52982	12.8	5.45527	2.4	0.489898	20.0777	5.136	15.628	2.20819	0.88	0.365513	1.036	0.292411	184	42.8532	0.892	0.319399	2.706	0.91812	111.199	55.6839	0.000200009	0.000399996	62.0159	75.987	961.32	1210.74	554.88	658.399	92.76	75.7382	11.9132	19.423	1092.64	270.326
382	MgSiO3	-3.13538	5.7928	3.67602	148	90.6956	5.34395	5.34395	5.34395	53.1887	53.1887	53.1887	10	10	2.52982	12.8	5.45527	2.4	0.489898	20.0777	5.136	15.628	2.20819	0.88	0.365513	1.036	0.292411	184	42.8532	0.892	0.319399	2.706	0.91812	111.199	55.6839	0.000200009	0.000399996	62.0159	75.987	961.32	1210.74	554.88	658.399	92.76	75.7382	11.9132	19.423	1092.64	270.326
383	MgSiO3	-3.11633	5.0524	3.44701	14	386.885	4.89109	8.46731	9.44596	90	98.5163	90	40	10	2.52982	12.8	5.45527	2.4	0.489898	20.0777	5.136	15.628	2.20819	0.88	0.365513	1.036	0.292411	184	42.8532	0.892	0.319399	2.706	0.91812	111.199	55.6839	0.000200009	0.000399996	62.0159	75.987	961.32	1210.74	554.88	658.399	92.76	75.7382	11.9132	19.423	1092.64	270.326
384	MgSiO3	-3.10406	4.2049	2.48795	33	536.021	4.87578	10.913	10.0738	90	90	90	40	10	2.52982	12.8	5.45527	2.4	0.489898	20.0777	5.136	15.628	2.20819	0.88	0.365513	1.036	0.292411	184	42.8532	0.892	0.319399	2.706	0.91812	111.199	55.6839	0.000200009	0.000399996	62.0159	75.987	961.32	1210.74	554.88	658.399	92.76	75.7382	11.9132	19.423	1092.64	270.326
385	MgSiO3	-3.24404	4.6064	2.98752	60	446.389	5.38003	8.85871	9.36608	90	90	90	40	10	2.52982	12.8	5.45527	2.4	0.489898	20.0777	5.136	15.628	2.20819	0.88	0.365513	1.036	0.292411	184	42.8532	0.892	0.319399	2.706	0.91812	111.199	55.6839	0.000200009	0.000399996	62.0159	75.987	961.32	1210.74	554.88	658.399	92.76	75.7382	11.9132	19.423	1092.64	270.326
386	MgSiO3	-3.24465	4.6484	3.08414	14	432.404	5.23784	8.94334	9.47282	90	102.98	90	40	10	2.52982	12.8	5.45527	2.4	0.489898	20.0777	5.136	15.628	2.20819	0.88	0.365513	1.036	0.292411	184	42.8532	0.892	0.319399	2.706	0.91812	111.199	55.6839	0.000200009	0.000399996	62.0159	75.987	961.32	1210.74	554.88	658.399	92.76	75.7382	11.9132	19.423	1092.64	270.326
387	MgSiO3	-3.03516	5.4155	3.97065	62	167.932	4.83091	4.98103	6.97887	90	90	90	20	10	2.52982	12.8	5.45527	2.4	0.489898	20.0777	5.136	15.628	2.20819	0.88	0.365513	1.036	0.292411	184	42.8532	0.892	0.319399	2.706	0.91812	111.199	55.6839	0.000200009	0.000399996	62.0159	75.987	961.32	1210.74	554.88	658.399	92.76	75.7382	11.9132	19.423	1092.64	270.326
388	MgSiO3	-3.13868	4.2239	3.05529	14	436.488	5.25372	9.01183	9.93073	90	111.821	90	40	10	2.52982	12.8	5.45527	2.4	0.489898	20.0777	5.136	15.628	2.20819	0.88	0.365513	1.036	0.292411	184	42.8532	0.892	0.319399	2.706	0.91812	111.199	55.6839	0.000200009	0.000399996	62.0159	75.987	961.32	1210.74	554.88	658.399	92.76	75.7382	11.9132	19.423	1092.64	270.326
389	MgSiO3	-3.23949	4.6751	3.04704	33	437.668	9.2805	8.95301	5.2675	90	90	90	40	10	2.52982	12.8	5.45527	2.4	0.489898	20.0777	5.136	15.628	2.20819	0.88	0.365513	1.036	0.292411	184	42.8532	0.892	0.319399	2.706	0.91812	111.199	55.6839	0.000200009	0.000399996	62.0159	75.987	961.32	1210.74	554.88	658.399	92.76	75.7382	11.9132	19.423	1092.64	270.326
390	MgSiO3	-3.20154	4.5951	3.15477	60	422.723	4.9906	9.06395	9.34514	90	90	90	40	10	2.52982	12.8	5.45527	2.4	0.489898	20.0777	5.136	15.628	2.20819	0.88	0.365513	1.036	0.292411	184	42.8532	0.892	0.319399	2.706	0.91812	111.199	55.6839	0.000200009	0.000399996	62.0159	75.987	961.32	1210.74	554.88	658.399	92.76	75.7382	11.9132	19.423	1092.64	270.326
391	MgSiO3	-3.05377	5.0422	3.44513	15	193.548	4.87078	6.38369	6.38369	80.5486	83.3783	83.3783	20	10	2.52982	12.8	5.45527	2.4	0.489898	20.0777	5.136	15.628	2.20819	0.88	0.365513	1.036	0.292411	184	42.8532	0.892	0.319399	2.706	0.91812	111.199	55.6839	0.000200009	0.000399996	62.0159	75.987	961.32	1210.74	554.88	658.399	92.76	75.7382	11.9132	19.423	1092.64	270.326
392	MgSiO3	-3.24445	4.9229	3.08076	61	865.756	5.24579	8.9454	18.4495	90	90	90	80	10	2.52982	12.8	5.45527	2.4	0.489898	20.0777	5.136	15.628	2.20819	0.88	0.365513	1.036	0.292411	184	42.8532	0.892	0.319399	2.706	0.91812	111.199	55.6839	0.000200009	0.000399996	62.0159	75.987	961.32	1210.74	554.88	658.399	92.76	75.7382	11.9132	19.423	1092.64	270.326
393	MgSiO3	-3.14971	4.5226	3.4237	5	1558.08	10.0487	10.0487	20.0622	109.339	109.377	109.769	160	10	2.52982	12.8	5.45527	2.4	0.489898	20.0777	5.136	15.628	2.20819	0.88	0.365513	1.036	0.292411	184	42.8532	0.892	0.319399	2.706	0.91812	111.199	55.6839	0.000200009	0.000399996	62.0159	75.987	961.32	1210.74	554.88	658.399	92.76	75.7382	11.9132	19.423	1092.64	270.326
394	MgSiO3	-3.23124	4.5304	3.08818	14	431.838	5.16799	8.98475	9.64359	90	105.335	90	40	10	2.52982	12.8	5.45527	2.4	0.489898	20.0777	5.136	15.628	2.20819	0.88	0.365513	1.036	0.292411	184	42.8532	0.892	0.319399	2.706	0.91812	111.199	55.6839	0.000200009	0.000399996	62.0159	75.987	961.32	1210.74	554.88	658.399	92.76	75.7382	11.9132	19.423	1092.64	270.326
395	MgSiO3	-2.94516	2.4376	3.26939	33	407.903	5.06236	8.48561	9.49557	90	90	90	40	10	2.52982	12.8	5.45527	2.4	0.489898	20.0777	5.136	15.628	2.20819	0.88	0.365513	1.036	0.292411	184	42.8532	0.892	0.319399	2.706	0.91812	111.199	55.6839	0.000200009	0.000399996	62.0159	75.987	961.32	1210.74	554.88	658.399	92.76	75.7382	11.9132	19.423	1092.64	270.326
396	MgSiO3	-2.78518	2.5571	3.79872	221	43.8831	3.52722	3.52722	3.52722	90	90	90	5	10	2.52982	12.8	5.45527	2.4	0.489898	20.0777	5.136	15.628	2.20819	0.88	0.365513	1.036	0.292411	184	42.8532	0.892	0.319399	2.706	0.91812	111.199	55.6839	0.000200009	0.000399996	62.0159	75.987	961.32	1210.74	554.88	658.399	92.76	75.7382	11.9132	19.423	1092.64	270.326
397	MgSiO3	-3.24119	4.5985	2.99779	29	889.718	18.7078	8.92094	5.33113	90	90	90	80	10	2.52982	12.8	5.45527	2.4	0.489898	20.0777	5.136	15.628	2.20819	0.88	0.365513	1.036	0.292411	184	42.8532	0.892	0.319399	2.706	0.91812	111.199	55.6839	0.000200009	0.000399996	62.0159	75.987	961.32	1210.74	554.88	658.399	92.76	75.7382	11.9132	19.423	1092.64	270.326
398	MgSiO3	-3.2338	4.5584	3.14007	29	849.403	18.5382	8.93796	5.12635	90	90	90	80	10	2.52982	12.8	5.45527	2.4	0.489898	20.0777	5.136	15.628	2.20819	0.88	0.365513	1.036	0.292411	184	42.8532	0.892	0.319399	2.706	0.91812	111.199	55.6839	0.000200009	0.000399996	62.0159	75.987	961.32	1210.74	554.88	658.399	92.76	75.7382	11.9132	19.423	1092.64	270.326
399	MgSiO3	-3.24186	4.5708	3.00415	13	887.836	18.6414	8.90003	5.35252	90	91.204	90	80	10	2.52982	12.8	5.45527	2.4	0.489898	20.0777	5.136	15.628	2.20819	0.88	0.365513	1.036	0.292411	184	42.8532	0.892	0.319399	2.706	0.91812	111.199	55.6839	0.000200009	0.000399996	62.0159	75.987	961.32	1210.74	554.88	658.399	92.76	75.7382	11.9132	19.423	1092.64	270.326
400	MgSiO3	-3.24211	4.6421	3.04868	14	874.866	18.5314	8.98205	5.25606	90	89.775	90	80	10	2.52982	12.8	5.45527	2.4	0.489898	20.0777	5.136	15.628	2.20819	0.88	0.365513	1.036	0.292411	184	42.8532	0.892	0.319399	2.706	0.91812	111.199	55.6839	0.000200009	0.000399996	62.0159	75.987	961.32	1210.74	554.88	658.399	92.76	75.7382	11.9132	19.423	1092.64	270.326
401	MgSiO3	-3.23162	4.4111	3.05297	13	873.638	18.8009	8.99049	5.19805	90.0003	83.8933	90.0002	80	10	2.52982	12.8	5.45527	2.4	0.489898	20.0777	5.136	15.628	2.20819	0.88	0.365513	1.036	0.292411	184	42.8532	0.892	0.319399	2.706	0.91812	111.199	55.6839	0.000200009	0.000399996	62.0159	75.987	961.32	1210.74	554.88	658.399	92.76	75.7382	11.9132	19.423	1092.64	270.326
402	MgSiO3	-3.2395	4.5433	3.02808	7	880.818	18.6886	8.96475	5.2794	90	95.2316	90	80	10	2.52982	12.8	5.45527	2.4	0.489898	20.0777	5.136	15.628	2.20819	0.88	0.365513	1.036	0.292411	184	42.8532	0.892	0.319399	2.706	0.91812	111.199	55.6839	0.000200009	0.000399996	62.0159	75.987	961.32	1210.74	554.88	658.399	92.76	75.7382	11.9132	19.423	1092.64	270.326
403	MgSiO3	-3.2412	4.5456	2.99288	7	891.178	18.7732	8.92152	5.33701	90	94.4497	90	80	10	2.52982	12.8	5.45527	2.4	0.489898	20.0777	5.136	15.628	2.20819	0.88	0.365513	1.036	0.292411	184	42.8532	0.892	0.319399	2.706	0.91812	111.199	55.6839	0.000200009	0.000399996	62.0159	75.987	961.32	1210.74	554.88	658.399	92.76	75.7382	11.9132	19.423	1092.64	270.326
404	MgSiO3	-2.99068	4.6425	3.96487	63	84.0881	2.71518	4.80008	6.72652	90	90	106.429	10	10	2.52982	12.8	5.45527	2.4	0.489898	20.0777	5.136	15.628	2.20819	0.88	0.365513	1.036	0.292411	184	42.8532	0.892	0.319399	2.706	0.91812	111.199	55.6839	0.000200009	0.000399996	62.0159	75.987	961.32	1210.74	554.88	658.399	92.76	75.7382	11.9132	19.423	1092.64	270.326
405	MgSnO3	-2.4446	2.009	5.5626	62	228.084	5.33165	5.45691	7.83945	90	90	90	20	17.2	16.473	12.8	5.45527	2.8	1.16619	38.2026	40.382	16.474	1.30457	0.95	0.428952	1.094	0.203529	188.6	47.3607	0.944	0.372322	2.718	0.907841	106.045	54.6034	3.18e-08	4.5e-08	45.4159	62.8903	901.72	1102.93	318.496	348.954	92.76	75.7382	3.2732	3.77541	1077.06	289.113
406	MgSnO3	-1.88806	0.8353	4.86339	221	65.2189	4.02523	4.02523	4.02523	90	90	90	5	17.2	16.473	12.8	5.45527	2.8	1.16619	38.2026	40.382	16.474	1.30457	0.95	0.428952	1.094	0.203529	188.6	47.3607	0.944	0.372322	2.718	0.907841	106.045	54.6034	3.18e-08	4.5e-08	45.4159	62.8903	901.72	1102.93	318.496	348.954	92.76	75.7382	3.2732	3.77541	1077.06	289.113
407	MgTiO3	-3.30155	2.6362	3.95355	62	201.892	5.10086	5.30255	7.46432	90	90	90	20	11.6	5.42586	10.8	6.4	2.6	0.8	24.034	12.343	15.344	2.688	0.94	0.417612	1.09833	0.198018	189.4	48.2808	0.96	0.392734	2.634	0.98982	86.1056	67.2452	8.88e-08	1.57e-07	36.4159	62.3753	1038.72	1353.59	605.68	747.553	92.76	75.7382	5.6132	7.32104	1067.1	302.197
408	MgTiO3	-2.92901	1.5962	3.51728	221	56.7334	3.84249	3.84249	3.84249	90	90	90	5	11.6	5.42586	10.8	6.4	2.6	0.8	24.034	12.343	15.344	2.688	0.94	0.417612	1.09833	0.198018	189.4	48.2808	0.96	0.392734	2.634	0.98982	86.1056	67.2452	8.88e-08	1.57e-07	36.4159	62.3753	1038.72	1353.59	605.68	747.553	92.76	75.7382	5.6132	7.32104	1067.1	302.197
	MgTiO3	-3.38396	3.5295	3.78001	148	105.58	5.53134	5.53134	5.53134	54.9417	54.9417	54.9417	10	11.6	5.42586	10.8	6.4	2.6	0.8	24.034	12.343	15.344	2.688	0.94	0.417612	1.09833	0.198018	189.4	48.2808	0.96	0.392734	2.634	0.98982	86.1056	67.2452	8.88e-08	1.57e-07	36.4159	62.3753	1038.72	1353.59	605.68	747.553	92.76	75.7382	5.6132	7.32104	1067.1	302.197
409	MgVO3	-2.68935	0.9187	4.10995	62	199.178	5.09273	5.24988	7.44973	89.9982	89.998	90.0014	20	11.8	5.81034	11	6.19677	2.6	0.8	24.6489	13.5341	14.88	3.52872	0.93	0.40694	1.0835	0.217736	188.6	47.3607	0.952	0.38233	2.652	0.97039	94.7056	58.8851	4.88e-08	7.75e-08	38.2159	62.0624	1062.72	1398.41	654.08	835.144	92.76	75.7382	6.4332	8.81757	1065.52	304.34
410	MgWO3	-2.377	2.5393	7.48418	14	227.325	5.3052	5.42533	7.89806	90	90.026	90	20	22	26.0461	11.2	6.01332	3	1.54919	51.2286	66.3837	15.11	3.10578	0.93	0.40694	1.08133	0.220803	190	48.9939	0.964	0.398075	2.798	0.85352	100.337	55.6557	1.96e-08	2.42e-08	66.0159	80.882	1492.32	2223.18	956.48	1409.94	92.76	75.7382	8.8732	13.4697	1089.34	274.117
411	MgWO3	-2.06169	1.1672	6.2086	1	68.5075	4.14933	6.12377	4.09819	89.5229	95.5177	138.392	5	22	26.0461	11.2	6.01332	3	1.54919	51.2286	66.3837	15.11	3.10578	0.93	0.40694	1.08133	0.220803	190	48.9939	0.964	0.398075	2.798	0.85352	100.337	55.6557	1.96e-08	2.42e-08	66.0159	80.882	1492.32	2223.18	956.48	1409.94	92.76	75.7382	8.8732	13.4697	1089.34	274.117
412	MgZrO3	-2.85781	0.6317	3.84539	221	70.6153	4.13333	4.13333	4.13333	90	90	90	5	15.2	12.4964	10.8	6.4	2.8	1.16619	32.7054	29.4356	16.02	1.64117	0.97	0.453431	1.1	0.195959	190.6	49.7256	0.992	0.43774	2.592	1.0386	92.8062	60.4106	9.54e-08	1.7e-07	36.6159	62.3304	1263.12	1779.1	643.08	815.054	92.76	75.7382	6.0732	8.15376	1063.34	307.327
413	MnAlO3	-2.58532	0.6812	4.29897	62	200.73	4.87401	4.95994	8.30328	89.9886	90.0094	89.999	20	12.4	6.5909	13.6	3.49857	2.6	0.8	25.9836	15.0891	13.886	4.3365	0.89	0.358329	1.02067	0.293244	184	42.1189	0.89	0.306594	2.696	0.911408	92.938	60.2983	2.93e-07	5.73e-07	48.5759	93.2606	1079.32	1220.05	523.374	603.015	92.76	75.7382	4.9132	5.79966	1046.76	329.059
414	MnAlO3	-2.67998	1.1732	4.4143	2	97.7429	4.98962	4.86262	5.38276	65.4584	119.477	117.595	10	12.4	6.5909	13.6	3.49857	2.6	0.8	25.9836	15.0891	13.886	4.3365	0.89	0.358329	1.02067	0.293244	184	42.1189	0.89	0.306594	2.696	0.911408	92.938	60.2983	2.93e-07	5.73e-07	48.5759	93.2606	1079.32	1220.05	523.374	603.015	92.76	75.7382	4.9132	5.79966	1046.76	329.059
415	MnBiO3	-1.74833	0.7651	7.46888	14	554.782	5.48692	10.5001	11.0474	119.35	90	90	40	26.4	29.0558	14	3.52136	3.2	1.6	62.3833	74.8339	16.148	4.65742	0.96	0.445421	1.09267	0.238646	195	56.2139	0.942	0.375787	2.778	0.824291	102.77	54.9201	5.48e-07	6.73e-07	3.17595	3.85769	888.32	990.048	445.56	569.232	92.76	75.7382	4.9532	5.83998	1071.86	295.37
416	MnBiO3	-1.81827	0.1725	8.10213	15	511.421	5.61537	9.75936	9.82618	108.247	89.9997	90.0005	40	26.4	29.0558	14	3.52136	3.2	1.6	62.3833	74.8339	16.148	4.65742	0.96	0.445421	1.09267	0.238646	195	56.2139	0.942	0.375787	2.778	0.824291	102.77	54.9201	5.48e-07	6.73e-07	3.17595	3.85769	888.32	990.048	445.56	569.232	92.76	75.7382	4.9532	5.83998	1071.86	295.37
417	MnBiO3	-1.81827	0.0797	8.10315	15	511.357	5.60645	9.75764	9.83469	108.112	90	90	40	26.4	29.0558	14	3.52136	3.2	1.6	62.3833	74.8339	16.148	4.65742	0.96	0.445421	1.09267	0.238646	195	56.2139	0.942	0.375787	2.778	0.824291	102.77	54.9201	5.48e-07	6.73e-07	3.17595	3.85769	888.32	990.048	445.56	569.232	92.76	75.7382	4.9532	5.83998	1071.86	295.37
418	MnCO3	-2.0295	3.455	3.54732	167	107.616	5.99214	5.99214	5.99214	47.6616	47.6616	47.6616	10	11	7.04273	13.8	3.48712	2.4	0.8	22.9894	16.0489	12.944	5.44756	0.78	0.31241	0.945667	0.400427	174.4	36.8163	0.792	0.252618	2.884	0.750802	108.941	54.9756	2.29e-06	3.9e-06	29.5759	55.294	1380.92	1698.66	1096.68	1465.8	92.76	75.7382	26.1732	45.6907	1148.46	232.818
419	MnCO3	-2.0295	3.4614	3.53884	167	107.874	4.84635	4.84635	5.99628	66.1645	66.1645	60	10	11	7.04273	13.8	3.48712	2.4	0.8	22.9894	16.0489	12.944	5.44756	0.78	0.31241	0.945667	0.400427	174.4	36.8163	0.792	0.252618	2.884	0.750802	108.941	54.9756	2.29e-06	3.9e-06	29.5759	55.294	1380.92	1698.66	1096.68	1465.8	92.76	75.7382	26.1732	45.6907	1148.46	232.818
420	MnCoO3	-1.67263	1.0859	5.28507	148	101.717	5.47135	5.47135	5.47135	54.7726	54.7726	54.7726	10	15.2	8.84081	12.8	3.96989	2.8	0.979796	32.3739	20.0943	13.22	5.075	0.91	0.38	1.03933	0.272911	187	45.3431	0.878	0.293557	2.75	0.851493	97.3602	57.1094	3e-07	5.7e-07	21.5759	39.3274	1160.92	1339.65	690.28	782.274	92.76	75.7382	6.0132	7.15591	1083.34	281.605
421	MnFeO3	-1.9584	0.6397	4.84419	73	435.428	8.27018	8.27018	8.27018	109.71	109.271	109.433	40	15	8.57904	12.6	4.17612	2.8	0.979796	31.7562	19.3003	13.304	4.96825	0.92	0.391918	1.05617	0.257857	187.8	46.2964	0.89	0.306594	2.74	0.861882	87.4994	65.657	3.08e-07	5.67e-07	17.5759	31.3569	1147.72	1319.67	698.88	794.22	92.76	75.7382	5.5332	6.50763	1083.76	281.124
422	MnGeO3	-2.13867	1.3076	4.59447	61	1015.31	5.57017	9.33178	19.5329	90	90	90	80	16.2	10.284	13.8	3.48712	2.8	0.979796	35.1152	24.072	14.612	3.90782	0.89	0.358329	1.03967	0.272581	184.8	42.9204	0.882	0.297752	2.776	0.826138	108.373	54.8547	0.000100288	0.000199857	13.5759	23.4065	1139.52	1307.37	578.96	649.29	92.76	75.7382	9.1332	12.398	1083.66	281.238
423	MnGeO3	-2.11736	1.6732	5.32804	148	109.44	5.10617	5.10617	5.67297	63.2535	63.2535	60	10	16.2	10.284	13.8	3.48712	2.8	0.979796	35.1152	24.072	14.612	3.90782	0.89	0.358329	1.03967	0.272581	184.8	42.9204	0.882	0.297752	2.776	0.826138	108.373	54.8547	0.000100288	0.000199857	13.5759	23.4065	1139.52	1307.37	578.96	649.29	92.76	75.7382	9.1332	12.398	1083.66	281.238
424	MnGeO3	-2.11736	1.8461	5.33409	148	109.316	5.66881	5.66881	5.66881	53.5307	53.5307	53.5307	10	16.2	10.284	13.8	3.48712	2.8	0.979796	35.1152	24.072	14.612	3.90782	0.89	0.358329	1.03967	0.272581	184.8	42.9204	0.882	0.297752	2.776	0.826138	108.373	54.8547	0.000100288	0.000199857	13.5759	23.4065	1139.52	1307.37	578.96	649.29	92.76	75.7382	9.1332	12.398	1083.66	281.238
425	MnNiO3	-1.49733	1.3822	5.38168	148	99.743	5.43141	5.43141	5.43141	54.8609	54.8609	54.8609	10	15.4	9.11263	13	3.79473	2.8	0.979796	32.3259	20.0311	13.204	5.09571	0.91	0.38	1.03367	0.278712	187	45.3431	0.876	0.29152	2.756	0.845425	106.893	54.6491	3.02e-07	5.69e-07	19.7759	35.7391	1158.12	1335.39	682.28	771.34	92.76	75.7382	6.2132	7.44592	1078.68	287.051
426	MnPbO3	-1.60289	0.1253	8.58477	221	59.9892	3.91463	3.91463	3.91463	90	90	90	5	26.2	28.6664	13.8	3.48712	3.2	1.6	62.0272	74.1365	15.538	4.10881	1	0.505964	1.11017	0.236978	189.8	48.8279	0.932	0.361187	2.84	0.775139	91.6098	61.4726	3.3e-07	5.61e-07	8.57595	13.5507	925.32	1027.56	456.802	571.623	92.76	75.7382	3.7272	5.05333	1074.38	292.249
427	MnPbO3	-1.65402	0.0383	8.22079	15	375.871	5.60775	5.5941	13.8559	88.9466	87.8979	59.9193	30	26.2	28.6664	13.8	3.48712	3.2	1.6	62.0272	74.1365	15.538	4.10881	1	0.505964	1.11017	0.236978	189.8	48.8279	0.932	0.361187	2.84	0.775139	91.6098	61.4726	3.3e-07	5.61e-07	8.57595	13.5507	925.32	1027.56	456.802	571.623	92.76	75.7382	3.7272	5.05333	1074.38	292.249
428	MnSiO3	-2.73284	3.1488	4.16965	88	834.858	10.2745	10.2745	10.2745	109.124	109.124	110.167	80	12.6	6.62118	13.8	3.48712	2.6	0.8	26.2043	15.1102	14.298	4.03512	0.86	0.332265	0.993667	0.327984	182.8	41.0044	0.87	0.285657	2.754	0.847434	111.199	55.6839	0.000200288	0.000399856	31.5759	59.2885	1155.52	1331.45	674.08	760.318	92.76	75.7382	12.8132	19.3574	1088.56	275.751
429	MnSiO3	-2.50537	0.0302	3.47202	2	626.628	6.48035	8.12798	13.2135	113.764	84.1142	100.144	50	12.6	6.62118	13.8	3.48712	2.6	0.8	26.2043	15.1102	14.298	4.03512	0.86	0.332265	0.993667	0.327984	182.8	41.0044	0.87	0.285657	2.754	0.847434	111.199	55.6839	0.000200288	0.000399856	31.5759	59.2885	1155.52	1331.45	674.08	760.318	92.76	75.7382	12.8132	19.3574	1088.56	275.751
430	MnSiO3	-2.80798	2.6466	3.59426	2	605.317	6.80166	7.73033	12.028	105.762	92.4426	94.5955	50	12.6	6.62118	13.8	3.48712	2.6	0.8	26.2043	15.1102	14.298	4.03512	0.86	0.332265	0.993667	0.327984	182.8	41.0044	0.87	0.285657	2.754	0.847434	111.199	55.6839	0.000200288	0.000399856	31.5759	59.2885	1155.52	1331.45	674.08	760.318	92.76	75.7382	12.8132	19.3574	1088.56	275.751
431	MnSiO3	-2.80804	2.8721	3.60543	2	844.818	6.81713	7.70653	16.2583	92.1687	96.3936	94.8653	70	12.6	6.62118	13.8	3.48712	2.6	0.8	26.2043	15.1102	14.298	4.03512	0.86	0.332265	0.993667	0.327984	182.8	41.0044	0.87	0.285657	2.754	0.847434	111.199	55.6839	0.000200288	0.000399856	31.5759	59.2885	1155.52	1331.45	674.08	760.318	92.76	75.7382	12.8132	19.3574	1088.56	275.751
432	MnSiO3	-2.79885	2.8197	3.60552	14	482.742	5.44933	9.3416	9.70158	90	102.183	90	40	12.6	6.62118	13.8	3.48712	2.6	0.8	26.2043	15.1102	14.298	4.03512	0.86	0.332265	0.993667	0.327984	182.8	41.0044	0.87	0.285657	2.754	0.847434	111.199	55.6839	0.000200288	0.000399856	31.5759	59.2885	1155.52	1331.45	674.08	760.318	92.76	75.7382	12.8132	19.3574	1088.56	275.751
433	MnSnO3	-2.07684	0.2273	5.97638	161	123.169	5.7107	5.7107	5.7107	57.191	57.191	57.191	10	19.8	16.473	13.8	3.48712	3	1.26491	44.3292	40.1317	15.144	3.91897	0.93	0.404475	1.05167	0.261542	187.4	45.8153	0.922	0.347125	2.766	0.835598	106.045	54.6034	3.11e-07	5.66e-07	14.9759	26.1857	1095.92	1243.57	437.696	568.082	92.76	75.7382	4.1732	5.2213	1072.98	293.976
434	MnSnO3	-2.09958	0.8776	5.84587	148	125.919	5.81669	5.81669	5.81669	55.8949	55.8949	55.8949	10	19.8	16.473	13.8	3.48712	3	1.26491	44.3292	40.1317	15.144	3.91897	0.93	0.404475	1.05167	0.261542	187.4	45.8153	0.922	0.347125	2.766	0.835598	106.045	54.6034	3.11e-07	5.66e-07	14.9759	26.1857	1095.92	1243.57	437.696	568.082	92.76	75.7382	4.1732	5.2213	1072.98	293.976
435	MnSnO3	-2.09958	1.0516	5.84383	148	125.963	5.824	5.824	5.824	55.7642	55.7642	55.7642	10	19.8	16.473	13.8	3.48712	3	1.26491	44.3292	40.1317	15.144	3.91897	0.93	0.404475	1.05167	0.261542	187.4	45.8153	0.922	0.347125	2.766	0.835598	106.045	54.6034	3.11e-07	5.66e-07	14.9759	26.1857	1095.92	1243.57	437.696	568.082	92.76	75.7382	4.1732	5.2213	1072.98	293.976
436	MnZnO3	-1.72712	0.1149	5.73136	62	195.098	5.18825	7.40551	5.07782	90	90	90	20	15.8	9.68297	13.4	3.55528	2.8	0.979796	33.669	21.8927	13.718	4.49709	0.91	0.38	1.06167	0.253715	186.8	45.1105	0.882	0.297752	2.704	0.901967	84.5856	69.0639	3e-07	5.7e-07	25.5759	47.3079	756.92	894.396	475.216	577.412	92.76	75.7382	4.2432	5.26092	1112.54	252.69
437	MnZnO3	-1.81866	1.4603	5.43254	148	102.915	5.49371	5.49371	5.49371	54.7531	54.7531	54.7531	10	15.8	9.68297	13.4	3.55528	2.8	0.979796	33.669	21.8927	13.718	4.49709	0.91	0.38	1.06167	0.253715	186.8	45.1105	0.882	0.297752	2.704	0.901967	84.5856	69.0639	3e-07	5.7e-07	25.5759	47.3079	756.92	894.396	475.216	577.412	92.76	75.7382	4.2432	5.26092	1112.54	252.69
438	NaAsO3	-1.90566	2.8378	3.19455	2	455.066	7.45717	7.61517	8.26118	103.787	92.6379	90.3219	30	13.6	9.76934	12.8	5.9127	2.6	0.8	29.1819	23.0295	17.762	3.45996	0.95	0.475395	1.12	0.233238	177.6	39.0774	0.944	0.393223	2.686	1.0045	110.673	37.9267	7.58e-08	1.29e-07	38.0159	54.5416	462.72	464.104	325.054	401.585	947.36	1009.41	6.1932	10.7928	1076.36	323.042
439	NaBiO3	-1.59977	1.0879	6.11454	148	152.063	6.3511	6.3511	6.3511	53.1466	53.1466	53.1466	10	23.6	29.7227	12.8	5.9127	3	1.54919	55.9937	76.5413	19.434	2.6575	1.04	0.542586	1.195	0.0888819	196	57.1314	1.004	0.446927	2.654	1.0225	113.344	35.9185	2.7e-07	5.15e-07	29.6159	55.2784	652.72	721.817	215.934	204.835	607.36	984.642	2.8332	4.13722	1027.56	355.678
440	NaBrO3	-1.0174	4.4649	3.15952	198	317.215	6.82	6.82	6.82	90	90	90	20	14	10.5641	13.2	6.11228	2.6	0.8	30.1784	25.0098	19.128	2.50774	0.95	0.475395	1.1645	0.146222	177.2	38.979	0.938	0.389482	2.842	0.973908	160.066	89.0344	2e+17	4e+17	28.0399	55.98	351.72	412.9	160.214	133.312	724.56	939.201	1.8132	2.19588	1114.94	316.746
441	NaIO3	-1.33768	3.6962	4.1574	62	316.167	5.80541	6.53669	8.33155	90	90	90	20	17.6	17.7381	13.2	6.11228	2.8	1.16619	39.5785	43.7468	20.316	3.67196	1	0.505964	1.24267	0.0416547	180.8	40.4297	0.976	0.418454	2.782	0.974031	154.189	78.3077	200000000000000	400000000000000	28.1057	55.9474	376.8	414.745	184.424	158.837	771.16	936.948	2.2052	2.92612	1088.64	319.033
442	NaNO3	-1.44685	2.5717	2.11674	1	533.413	6.47356	6.4923	26.0214	47.0393	47.1505	46.606	40	8.4	1.35647	12.8	5.9127	2.2	0.4	16.9989	3.09324	17.88	3.30021	0.85	0.475395	1.114	0.24508	173.2	38.8968	0.846	0.377974	2.858	0.976369	95.159	58.5516	9.8e-09	1.96e-08	28.0211	55.9894	300.792	427.633	119.664	125.644	632.6	970.262	0.7252	0.938922	1167.36	337.545
443	NaNO3	-1.45707	2.9553	2.12423	167	132.883	5.12796	5.12796	6.54323	66.9302	66.9302	60	10	8.4	1.35647	12.8	5.9127	2.2	0.4	16.9989	3.09324	17.88	3.30021	0.85	0.475395	1.114	0.24508	173.2	38.8968	0.846	0.377974	2.858	0.976369	95.159	58.5516	9.8e-09	1.96e-08	28.0211	55.9894	300.792	427.633	119.664	125.644	632.6	970.262	0.7252	0.938922	1167.36	337.545
444	NaNbO3	-2.8486	2.3619	4.36127	57	499.217	5.59754	5.68743	15.6811	90	90	90	40	15.2	12.9522	10.8	6.49307	2.8	1.16619	32.7789	30.1854	17.338	4.09524	1.01	0.514198	1.152	0.170458	191.2	50.4951	1.016	0.460678	2.57	1.08639	112.835	36.2489	4.02e-08	5.9e-08	38.8159	54.7405	1288.72	1909.29	657.054	1053.61	607.36	984.642	6.0132	10.4341	1017.38	365.417
445	NaNbO3	-2.82734	1.8833	4.17808	17	521.107	5.73823	5.69121	15.9568	90	90	90	40	15.2	12.9522	10.8	6.49307	2.8	1.16619	32.7789	30.1854	17.338	4.09524	1.01	0.514198	1.152	0.170458	191.2	50.4951	1.016	0.460678	2.57	1.08639	112.835	36.2489	4.02e-08	5.9e-08	38.8159	54.7405	1288.72	1909.29	657.054	1053.61	607.36	984.642	6.0132	10.4341	1017.38	365.417
446	NaNbO3	-2.85089	2.8498	4.32825	161	503.026	7.95414	7.95414	7.95414	89.016	89.016	89.016	40	15.2	12.9522	10.8	6.49307	2.8	1.16619	32.7789	30.1854	17.338	4.09524	1.01	0.514198	1.152	0.170458	191.2	50.4951	1.016	0.460678	2.57	1.08639	112.835	36.2489	4.02e-08	5.9e-08	38.8159	54.7405	1288.72	1909.29	657.054	1053.61	607.36	984.642	6.0132	10.4341	1017.38	365.417
447	NaNbO3	-2.84845	2.4098	4.34845	29	500.689	5.56654	5.64486	15.9342	90	90	90	40	15.2	12.9522	10.8	6.49307	2.8	1.16619	32.7789	30.1854	17.338	4.09524	1.01	0.514198	1.152	0.170458	191.2	50.4951	1.016	0.460678	2.57	1.08639	112.835	36.2489	4.02e-08	5.9e-08	38.8159	54.7405	1288.72	1909.29	657.054	1053.61	607.36	984.642	6.0132	10.4341	1017.38	365.417
448	NaNbO3	-2.84897	2.3639	4.33335	26	251.217	5.69808	5.62103	7.8434	90	90	90	20	15.2	12.9522	10.8	6.49307	2.8	1.16619	32.7789	30.1854	17.338	4.09524	1.01	0.514198	1.152	0.170458	191.2	50.4951	1.016	0.460678	2.57	1.08639	112.835	36.2489	4.02e-08	5.9e-08	38.8159	54.7405	1288.72	1909.29	657.054	1053.61	607.36	984.642	6.0132	10.4341	1017.38	365.417
449	NaNbO3	-2.83831	1.681	4.39958	63	247.435	5.58105	5.58105	7.94426	90	90	90.6011	20	15.2	12.9522	10.8	6.49307	2.8	1.16619	32.7789	30.1854	17.338	4.09524	1.01	0.514198	1.152	0.170458	191.2	50.4951	1.016	0.460678	2.57	1.08639	112.835	36.2489	4.02e-08	5.9e-08	38.8159	54.7405	1288.72	1909.29	657.054	1053.61	607.36	984.642	6.0132	10.4341	1017.38	365.417
450	NaNbO3	-2.86158	3.8336	4.02322	148	135.291	5.42517	5.42517	6.16304	63.8874	63.8874	60	10	15.2	12.9522	10.8	6.49307	2.8	1.16619	32.7789	30.1854	17.338	4.09524	1.01	0.514198	1.152	0.170458	191.2	50.4951	1.016	0.460678	2.57	1.08639	112.835	36.2489	4.02e-08	5.9e-08	38.8159	54.7405	1288.72	1909.29	657.054	1053.61	607.36	984.642	6.0132	10.4341	1017.38	365.417
451	NaNbO3	-2.8342	1.5604	4.36094	127	124.814	4.01795	5.57352	5.57352	90	90	90	10	15.2	12.9522	10.8	6.49307	2.8	1.16619	32.7789	30.1854	17.338	4.09524	1.01	0.514198	1.152	0.170458	191.2	50.4951	1.016	0.460678	2.57	1.08639	112.835	36.2489	4.02e-08	5.9e-08	38.8159	54.7405	1288.72	1909.29	657.054	1053.61	607.36	984.642	6.0132	10.4341	1017.38	365.417
452	NaNbO3	-2.8208	1.5249	4.22385	59	515.459	8.01774	8.01815	8.01803	90	90	90	40	15.2	12.9522	10.8	6.49307	2.8	1.16619	32.7789	30.1854	17.338	4.09524	1.01	0.514198	1.152	0.170458	191.2	50.4951	1.016	0.460678	2.57	1.08639	112.835	36.2489	4.02e-08	5.9e-08	38.8159	54.7405	1288.72	1909.29	657.054	1053.61	607.36	984.642	6.0132	10.4341	1017.38	365.417
453	NaPO3	-2.65742	5.1221	2.54843	2	398.626	8.06239	7.09399	7.18403	90.2534	94.04	103.394	30	10	2.75681	12.8	5.9127	2.4	0.489898	20.3923	5.94318	18.576	2.60533	0.92	0.466476	1.098	0.276724	178	39.1918	0.922	0.381177	2.688	1.0035	109.566	38.9435	2.98e-08	3.99e-08	28.0631	55.9685	395.32	419.965	170.514	142.729	806.16	941.339	0.7812	0.923697	1089.16	318.904
454	NaSbO3	-2.01255	1.9296	4.50325	2	426.446	8.16446	8.10531	8.24758	109.319	109.399	108.452	30	17.2	16.9399	12.8	5.9127	2.8	1.16619	38.5496	41.6932	18.81	2.50571	1.01	0.514198	1.154	0.166565	189.4	48.2643	0.984	0.426033	2.66	1.01884	115.344	34.8778	8.98e-08	1.56e-07	32.8159	54.3904	657.32	729.383	287.81	331.421	607.36	984.642	4.5932	7.60934	1053.76	335.031
455	NaSbO3	-2.02648	1.7037	4.98497	52	256.824	5.48889	8.62151	5.4271	90	90	90	20	17.2	16.9399	12.8	5.9127	2.8	1.16619	38.5496	41.6932	18.81	2.50571	1.01	0.514198	1.154	0.166565	189.4	48.2643	0.984	0.426033	2.66	1.01884	115.344	34.8778	8.98e-08	1.56e-07	32.8159	54.3904	657.32	729.383	287.81	331.421	607.36	984.642	4.5932	7.60934	1053.76	335.031
456	NaSbO3	-2.02277	1.4934	4.57557	227	279.804	7.34158	7.34158	7.34158	60	60	60	20	17.2	16.9399	12.8	5.9127	2.8	1.16619	38.5496	41.6932	18.81	2.50571	1.01	0.514198	1.154	0.166565	189.4	48.2643	0.984	0.426033	2.66	1.01884	115.344	34.8778	8.98e-08	1.56e-07	32.8159	54.3904	657.32	729.383	287.81	331.421	607.36	984.642	4.5932	7.60934	1053.76	335.031
457	NaSbO3	-1.98579	1.274	5.41602	62	236.384	5.47647	5.53595	7.79697	90	90	90	20	17.2	16.9399	12.8	5.9127	2.8	1.16619	38.5496	41.6932	18.81	2.50571	1.01	0.514198	1.154	0.166565	189.4	48.2643	0.984	0.426033	2.66	1.01884	115.344	34.8778	8.98e-08	1.56e-07	32.8159	54.3904	657.32	729.383	287.81	331.421	607.36	984.642	4.5932	7.60934	1053.76	335.031
458	NaSbO3	-2.07822	2.7012	4.7065	148	136.01	6.24693	6.24693	6.24693	51.0489	51.0489	51.0489	10	17.2	16.9399	12.8	5.9127	2.8	1.16619	38.5496	41.6932	18.81	2.50571	1.01	0.514198	1.154	0.166565	189.4	48.2643	0.984	0.426033	2.66	1.01884	115.344	34.8778	8.98e-08	1.56e-07	32.8159	54.3904	657.32	729.383	287.81	331.421	607.36	984.642	4.5932	7.60934	1053.76	335.031
459	NaTaO3	-3.08776	2.6172	6.88654	33	242.995	5.52965	5.58393	7.86973	90	90	90	20	21.6	25.7263	10.8	6.49307	3	1.54919	50.3872	65.3365	17.342	4.08888	1.01	0.514198	1.152	0.170458	191.4	50.7527	1.02	0.465446	2.55	1.10483	101.373	48.9915	3.68e-08	5.26e-08	39.4159	54.9198	1431.52	2189.01	765.054	1268.39	607.36	984.642	7.8532	14.1035	1039.16	345.71
460	NaTaO3	-3.0007	2.7139	5.78616	227	289.207	7.42295	7.4229	7.42295	120	90	59.9998	20	21.6	25.7263	10.8	6.49307	3	1.54919	50.3872	65.3365	17.342	4.08888	1.01	0.514198	1.152	0.170458	191.4	50.7527	1.02	0.465446	2.55	1.10483	101.373	48.9915	3.68e-08	5.26e-08	39.4159	54.9198	1431.52	2189.01	765.054	1268.39	607.36	984.642	7.8532	14.1035	1039.16	345.71
461	NaTaO3	-2.99149	3.4185	5.75304	1	581.743	7.57019	7.42763	14.7669	59.1046	60.2666	59.448	40	21.6	25.7263	10.8	6.49307	3	1.54919	50.3872	65.3365	17.342	4.08888	1.01	0.514198	1.152	0.170458	191.4	50.7527	1.02	0.465446	2.55	1.10483	101.373	48.9915	3.68e-08	5.26e-08	39.4159	54.9198	1431.52	2189.01	765.054	1268.39	607.36	984.642	7.8532	14.1035	1039.16	345.71
462	NaTaO3	-3.07332	2.2584	6.62026	221	63.1923	3.9831	3.9831	3.9831	90	90	90	5	21.6	25.7263	10.8	6.49307	3	1.54919	50.3872	65.3365	17.342	4.08888	1.01	0.514198	1.152	0.170458	191.4	50.7527	1.02	0.465446	2.55	1.10483	101.373	48.9915	3.68e-08	5.26e-08	39.4159	54.9198	1431.52	2189.01	765.054	1268.39	607.36	984.642	7.8532	14.1035	1039.16	345.71
463	NaTaO3	-3.08635	2.3846	6.8571	63	244.039	5.55708	5.55708	7.90283	90	90	90.5147	20	21.6	25.7263	10.8	6.49307	3	1.54919	50.3872	65.3365	17.342	4.08888	1.01	0.514198	1.152	0.170458	191.4	50.7527	1.02	0.465446	2.55	1.10483	101.373	48.9915	3.68e-08	5.26e-08	39.4159	54.9198	1431.52	2189.01	765.054	1268.39	607.36	984.642	7.8532	14.1035	1039.16	345.71
464	NaTaO3	-3.08312	2.2798	6.80769	127	122.905	3.99051	5.54971	5.54971	90	90	90	10	21.6	25.7263	10.8	6.49307	3	1.54919	50.3872	65.3365	17.342	4.08888	1.01	0.514198	1.152	0.170458	191.4	50.7527	1.02	0.465446	2.55	1.10483	101.373	48.9915	3.68e-08	5.26e-08	39.4159	54.9198	1431.52	2189.01	765.054	1268.39	607.36	984.642	7.8532	14.1035	1039.16	345.71
465	NaUO3	-3.29485	0.431	7.13639	62	287.616	5.97293	8.29341	5.8062	90	90	90	20	25.4	33.3203	11	6.32456	3.6	2.72764	61.8034	88.1544	17.67	3.59034	1.07	0.575847	1.18625	0.104911	201	64.8383	1.07	0.531639	2.526	1.12843	95.159	58.5516	6.58e-08	1.09e-07	33.4159	54.3063	1125.32	1591.79	388.114	523.117	607.36	984.642	3.4532	5.35322	1006.48	376.787
466	NaUO3	-3.29862	0.4047	7.08025	62	289.896	5.82449	5.96318	8.34655	90	90	90	20	25.4	33.3203	11	6.32456	3.6	2.72764	61.8034	88.1544	17.67	3.59034	1.07	0.575847	1.18625	0.104911	201	64.8383	1.07	0.531639	2.526	1.12843	95.159	58.5516	6.58e-08	1.09e-07	33.4159	54.3063	1125.32	1591.79	388.114	523.117	607.36	984.642	3.4532	5.35322	1006.48	376.787
467	NaVO3	-2.25118	0.2252	3.76719	221	53.7452	3.77381	3.77381	3.77381	90	90	90	5	11.6	5.81722	10.8	6.49307	2.6	0.8	24.3859	13.551	16.836	4.93082	0.99	0.498397	1.1435	0.187053	188.4	47.0982	0.992	0.434069	2.576	1.08108	105.279	43.7256	4.98e-08	7.75e-08	34.2159	54.2353	1021.32	1391.95	543.654	828.763	607.36	984.642	5.2132	8.8415	1017.14	365.657
468	NaVO3	-2.39271	3.2338	2.69305	15	300.727	6.01635	7.32036	7.32036	84.0029	75.0611	75.0611	20	11.6	5.81722	10.8	6.49307	2.6	0.8	24.3859	13.551	16.836	4.93082	0.99	0.498397	1.1435	0.187053	188.4	47.0982	0.992	0.434069	2.576	1.08108	105.279	43.7256	4.98e-08	7.75e-08	34.2159	54.2353	1021.32	1391.95	543.654	828.763	607.36	984.642	5.2132	8.8415	1017.14	365.657
469	NaWO3	-2.11582	0.3454	6.77072	221	62.4973	3.96845	3.96845	3.96845	90	90	90	5	21.8	26.1258	11	6.32456	3	1.54919	50.9656	66.4923	17.066	4.53952	0.99	0.498397	1.14133	0.191295	189.8	48.7459	1.004	0.446927	2.722	0.988826	110.91	37.7219	2.06e-08	2.53e-08	62.0159	76.5116	1450.92	2227.13	846.054	1429.72	607.36	984.642	7.6532	13.7044	1040.96	344.278
470	NbAgO3	-2.19758	1.7879	6.43265	57	513.75	5.67056	5.74775	15.7626	90	90	90	40	22.4	17.7381	12.8	4.35431	3.2	1.46969	49.7546	41.6113	14.636	3.3409	0.97	0.455631	1.13733	0.172284	191.8	51.2031	0.968	0.406664	2.77	0.827188	127.387	20.389	3.37e-08	5.95e-08	96.8159	167.898	1544.52	1959.4	829.866	1063.31	92.76	75.7382	7.7532	10.4453	1064.42	305.468
471	NbAgO3	-2.16221	0.8149	6.03634	63	273.74	6.84487	6.84487	6.22825	90	90	110.268	20	22.4	17.7381	12.8	4.35431	3.2	1.46969	49.7546	41.6113	14.636	3.3409	0.97	0.455631	1.13733	0.172284	191.8	51.2031	0.968	0.406664	2.77	0.827188	127.387	20.389	3.37e-08	5.95e-08	96.8159	167.898	1544.52	1959.4	829.866	1063.31	92.76	75.7382	7.7532	10.4453	1064.42	305.468
472	NbAgO3	-2.16461	1.3296	6.3399	221	65.1583	4.02399	4.02399	4.02399	90	90	90	5	22.4	17.7381	12.8	4.35431	3.2	1.46969	49.7546	41.6113	14.636	3.3409	0.97	0.455631	1.13733	0.172284	191.8	51.2031	0.968	0.406664	2.77	0.827188	127.387	20.389	3.37e-08	5.95e-08	96.8159	167.898	1544.52	1959.4	829.866	1063.31	92.76	75.7382	7.7532	10.4453	1064.42	305.468
473	NbCuO3	-2.31272	0.9479	4.65139	12	291.954	6.53729	6.53729	6.87183	90.5498	90.5498	83.8367	20	18.8	13.7608	12.8	4.35431	3	1.26491	40.8901	31.8673	14.004	4.27527	0.92	0.393192	1.084	0.215555	188.8	47.8598	0.94	0.382832	2.764	0.833345	126.094	20.6629	3.38e-08	5.95e-08	90.8159	155.999	1697.52	2050.7	854.434	1073.76	92.76	75.7382	8.1132	10.5913	1067.32	302.341
474	NbHO3	-2.47379	2.513	3.93612	1	239.476	6.8016	6.74508	6.77873	109.807	108.583	109.987	20	13.2	14.1619	10.8	6.49307	2.4	1.35647	28.3825	32.7802	14.866	3.06021	0.7	0.398748	0.92	0.490551	165.2	46.8632	0.76	0.41876	2.824	0.777936	116.816	29.9993	3.04e-08	6.08e-08	10.852	21.5741	1061.58	1977.9	585.682	1082.27	99.36	68.455	5.6048	10.5984	1180.62	264.26
475	NbHO3	-2.51877	2.6276	3.99623	1	235.874	6.72474	6.79742	6.74156	109.88	109.232	109.757	20	13.2	14.1619	10.8	6.49307	2.4	1.35647	28.3825	32.7802	14.866	3.06021	0.7	0.398748	0.92	0.490551	165.2	46.8632	0.76	0.41876	2.824	0.777936	116.816	29.9993	3.04e-08	6.08e-08	10.852	21.5741	1061.58	1977.9	585.682	1082.27	99.36	68.455	5.6048	10.5984	1180.62	264.26
476	NbTlO3	-2.37807	0.1138	8.26731	221	69.3531	4.10855	4.10855	4.10855	90	90	90	5	29.2	28.8818	13.2	4.26146	3.4	1.74356	69.0576	73.9288	16.026	2.59857	1.03	0.545527	1.1865	0.185389	193.2	52.9241	0.984	0.423018	2.708	0.896536	109.537	41.87	6.04e-08	7.4e-08	20.0159	24.6122	1406.72	1915.67	698.28	1045.61	92.76	75.7382	6.3332	10.3487	1036.1	339.711
477	NbTlO3	-2.46818	0.7458	7.22362	1	634.988	7.66029	7.65827	13.2576	106.7	89.9692	59.954	40	29.2	28.8818	13.2	4.26146	3.4	1.74356	69.0576	73.9288	16.026	2.59857	1.03	0.545527	1.1865	0.185389	193.2	52.9241	0.984	0.423018	2.708	0.896536	109.537	41.87	6.04e-08	7.4e-08	20.0159	24.6122	1406.72	1915.67	698.28	1045.61	92.76	75.7382	6.3332	10.3487	1036.1	339.711
478	NdAlO3	-3.68915	4.354	6.69664	167	108.719	5.33349	5.33349	5.33349	60.5937	60.5937	60.5937	10	19.4	20.3922	13.4	3.87814	3.4	2.33238	43.8443	50.3787	16.534	3.49832	0.98	0.502593	1.1463	0.235737	194	58.258	1.008	0.494061	2.614	1.0225	92.938	60.2983	1.34e-07	2.55e-07	50.4159	92.5258	1287.12	1477.39	478.974	532.072	92.76	75.7382	3.6932	4.40112	1009.92	371.461
479	NdAlO3	-3.66173	3.0236	6.77085	221	107.527	5.33751	5.33751	5.33751	60.0017	60.0017	60.0017	10	19.4	20.3922	13.4	3.87814	3.4	2.33238	43.8443	50.3787	16.534	3.49832	0.98	0.502593	1.1463	0.235737	194	58.258	1.008	0.494061	2.614	1.0225	92.938	60.2983	1.34e-07	2.55e-07	50.4159	92.5258	1287.12	1477.39	478.974	532.072	92.76	75.7382	3.6932	4.40112	1009.92	371.461
480	NdCoO3	-2.59146	0.0352	7.18327	62	232.253	5.5716	5.43782	7.66577	90	90	90	20	22.2	20.282	12.6	4.27083	3.6	2.33238	50.2347	49.8582	15.868	4.7661	1	0.514782	1.16497	0.19842	197	60.1332	0.996	0.488983	2.668	0.974031	97.3602	57.1094	1.41e-07	2.52e-07	23.4159	38.8522	1368.72	1566.82	645.88	739.086	92.76	75.7382	4.7932	6.29482	1046.5	334.215
481	NdCoO3	-2.42503	0.1422	7.58936	221	54.9563	3.80194	3.80194	3.80194	90	90	90	5	22.2	20.282	12.6	4.27083	3.6	2.33238	50.2347	49.8582	15.868	4.7661	1	0.514782	1.16497	0.19842	197	60.1332	0.996	0.488983	2.668	0.974031	97.3602	57.1094	1.41e-07	2.52e-07	23.4159	38.8522	1368.72	1566.82	645.88	739.086	92.76	75.7382	4.7932	6.29482	1046.5	334.215
482	NdCrO3	-3.00069	2.2715	6.82696	221	59.4062	3.90191	3.90191	3.90191	90	90	90	5	21.6	20.1752	12	4.89898	3.6	2.33238	48.8473	49.6931	15.98	4.55034	1.01	0.52192	1.1993	0.129807	198	60.8769	1.02	0.50024	2.624	1.01283	97.4456	57.0596	1.54e-07	2.49e-07	22.2159	36.4891	1317.52	1509.26	728.28	870.823	92.76	75.7382	5.6532	7.88688	1025	354.755
483	NdCrO3	-3.14503	2.4388	6.72257	62	241.315	5.47635	5.63598	7.81851	90	90	90	20	21.6	20.1752	12	4.89898	3.6	2.33238	48.8473	49.6931	15.98	4.55034	1.01	0.52192	1.1993	0.129807	198	60.8769	1.02	0.50024	2.624	1.01283	97.4456	57.0596	1.54e-07	2.49e-07	22.2159	36.4891	1317.52	1509.26	728.28	870.823	92.76	75.7382	5.6532	7.88688	1025	354.755
484	NdCrO3	-3.14429	2.3395	6.77844	62	239.326	5.45801	5.62664	7.79302	90	90	90	20	21.6	20.1752	12	4.89898	3.6	2.33238	48.8473	49.6931	15.98	4.55034	1.01	0.52192	1.1993	0.129807	198	60.8769	1.02	0.50024	2.624	1.01283	97.4456	57.0596	1.54e-07	2.49e-07	22.2159	36.4891	1317.52	1509.26	728.28	870.823	92.76	75.7382	5.6532	7.88688	1025	354.755
485	NdFeO3	-2.89006	1.4749	6.67762	62	246.768	5.50857	5.69199	7.87019	90	90	90	20	22	20.2386	12.4	4.45421	3.6	2.33238	49.617	49.7657	15.952	4.6042	1.01	0.52192	1.1818	0.164774	197.8	60.7236	1.008	0.494061	2.658	0.982291	87.4994	65.657	1.49e-07	2.5e-07	19.4159	30.9971	1355.52	1551.54	654.48	752.226	92.76	75.7382	4.3132	5.44021	1046.92	333.857
486	NdFeO3	-2.89013	1.6103	6.68739	62	246.407	5.5001	5.69712	7.86372	90	90	90	20	22	20.2386	12.4	4.45421	3.6	2.33238	49.617	49.7657	15.952	4.6042	1.01	0.52192	1.1818	0.164774	197.8	60.7236	1.008	0.494061	2.658	0.982291	87.4994	65.657	1.49e-07	2.5e-07	19.4159	30.9971	1355.52	1551.54	654.48	752.226	92.76	75.7382	4.3132	5.44021	1046.92	333.857
487	NdGaO3	-3.06877	3.4529	7.2587	62	239.712	5.47124	5.61587	7.80168	90	90	90	20	23	20.5329	13.4	3.87814	3.6	2.33238	52.3926	50.4183	16.894	2.83763	0.99	0.508331	1.1633	0.201751	195.4	59.0647	1.006	0.493137	2.654	0.98569	92.8836	60.3445	1.57e-07	2.49e-07	9.21595	11.8772	1224.12	1417.37	352.862	481.75	92.76	75.7382	2.6712	3.03741	1010.18	371.159
488	NdInO3	-2.89691	2.6533	7.25566	62	281.095	6.00381	8.24042	5.68168	90	90	90	20	26.6	23.0443	13.4	3.87814	3.8	2.4	61.4116	56.3914	17.686	1.5787	1.04	0.547175	1.1993	0.129807	197.6	60.5726	1.044	0.515736	2.648	0.990886	90.3656	62.6549	1.45e-07	2.51e-07	19.8159	31.7794	1197.72	1394.84	378.23	481.791	92.76	75.7382	2.2052	2.71554	1006.08	375.983
489	NdMnO3	-2.97865	0.0797	6.58868	62	249.185	5.48601	5.91687	7.67666	90	90	90	20	21.8	20.203	12.2	4.66476	3.6	2.33238	49.4356	49.7443	16.004	4.50421	1.01	0.52192	1.14097	0.2464	198	60.8769	1.018	0.499135	2.602	1.03449	84.5856	69.0639	4.17e-07	5.69e-07	4.97595	6.72372	1195.52	1393.04	596.08	666.637	92.76	75.7382	4.1932	5.23227	1037.88	341.95
490	NdNiO3	-2.33023	0.0502	7.24219	62	230.143	5.49585	5.43176	7.70943	90	90	90	20	22.4	20.3332	12.8	4.11825	3.6	2.33238	50.1867	49.8499	15.852	4.79699	1	0.514782	1.1593	0.209747	197	60.1332	0.994	0.488246	2.674	0.969239	106.893	54.6491	1.43e-07	2.52e-07	21.6159	35.3094	1365.92	1563.55	637.88	727.014	92.76	75.7382	4.9932	6.65939	1041.84	338.309
491	NdRhO3	-2.51068	0.6468	7.81561	62	250.832	5.40955	5.90936	7.84659	90	90	90	20	25.8	22.3105	12.6	4.27083	3.8	2.4	59.0291	54.2974	16.19	4.14813	1	0.514782	1.1603	0.207748	197.8	60.7236	1.028	0.504951	2.748	0.921008	106.526	54.6229	1.37e-07	2.53e-07	33.4159	58.6615	1522.32	1764.04	739.68	889.916	92.76	75.7382	5.8932	8.34025	1038.36	341.501
492	NdScO3	-3.91304	4.2936	5.94875	62	264.844	5.60946	5.84032	8.08413	90	90	90	20	21	20.1395	11.4	5.71314	3.6	2.33238	47.4392	49.6837	17.534	1.78051	1.05	0.556776	1.1883	0.151785	200.6	63.0669	1.078	0.544221	2.564	1.07513	88.2056	64.8832	2.39e-07	2.94e-07	6.61595	8.07649	1349.32	1544.46	655.08	753.149	92.76	75.7382	4.7532	6.22243	1021.02	358.994
493	NdVO3	-3.22655	1.0341	6.52649	62	247.492	5.49157	5.74559	7.84384	90	90	90	20	21.4	20.1554	11.8	5.15364	3.6	2.33238	48.6363	49.6815	16.198	4.13288	1	0.514782	1.1668	0.194755	197.4	60.4238	1.048	0.518706	2.618	1.0186	94.7056	58.8851	1.69e-07	2.5e-07	9.61595	12.5513	1464.72	1686.23	728.88	871.823	92.76	75.7382	6.1132	8.75833	1024.6	355.175
494	NdVO3	-2.99017	0.0201	6.68651	221	60.3921	3.92338	3.92338	3.92338	90	90	90	5	21.4	20.1554	11.8	5.15364	3.6	2.33238	48.6363	49.6815	16.198	4.13288	1	0.514782	1.1668	0.194755	197.4	60.4238	1.048	0.518706	2.618	1.0186	94.7056	58.8851	1.69e-07	2.5e-07	9.61595	12.5513	1464.72	1686.23	728.88	871.823	92.76	75.7382	6.1132	8.75833	1024.6	355.175
495	NdVO3	-3.16362	0.0317	6.56833	62	245.915	5.45763	5.69407	7.91331	90	90	90	20	21.4	20.1554	11.8	5.15364	3.6	2.33238	48.6363	49.6815	16.198	4.13288	1	0.514782	1.1668	0.194755	197.4	60.4238	1.048	0.518706	2.618	1.0186	94.7056	58.8851	1.69e-07	2.5e-07	9.61595	12.5513	1464.72	1686.23	728.88	871.823	92.76	75.7382	6.1132	8.75833	1024.6	355.175
496	NiBiO3	-1.24214	0.713	8.17452	146	128.249	5.82176	5.82176	5.82179	56.5031	56.5035	56.5039	10	27	29.0517	14.6	2.33238	3.2	1.6	63.1344	74.7742	15.996	4.94556	0.95	0.43589	1.111	0.204949	194	55.3534	0.918	0.356112	2.85	0.723436	125.078	20.5334	2.74e-07	5.14e-07	19.8159	35.7257	1058.72	1260.57	487.36	648.655	92.76	75.7382	5.7532	7.06118	1075.82	290.685
497	NiBiO3	-1.22979	0.3691	8.74068	2	239.883	5.37151	5.68496	7.85577	89.864	90.2821	90.3265	20	27	29.0517	14.6	2.33238	3.2	1.6	63.1344	74.7742	15.996	4.94556	0.95	0.43589	1.111	0.204949	194	55.3534	0.918	0.356112	2.85	0.723436	125.078	20.5334	2.74e-07	5.14e-07	19.8159	35.7257	1058.72	1260.57	487.36	648.655	92.76	75.7382	5.7532	7.06118	1075.82	290.685
498	NiCO3	-1.54632	3.4072	4.23388	167	93.1107	5.64332	5.64332	5.64332	48.7123	48.7123	48.7123	10	11.6	8.2365	14.4	2.33238	2.4	0.8	23.7405	17.5446	12.792	5.60972	0.77	0.292575	0.964	0.388309	173.4	34.9033	0.768	0.205465	2.956	0.626374	131.248	12.3462	2.01e-06	3.99e-06	46.2159	58.654	1551.32	1823.84	1138.48	1480.16	92.76	75.7382	26.9732	45.4911	1152.42	225.504
499	NiSnO3	-1.61988	1.7717	6.51294	148	114.937	5.61267	5.61267	5.61267	56.5091	56.5091	56.5091	10	20.4	16.7045	14.4	2.33238	3	1.26491	45.0803	40.3578	14.992	4.22139	0.92	0.393192	1.07	0.234435	186.4	44.5852	0.898	0.324247	2.838	0.737466	128.353	15.5184	3.74e-08	4.78e-08	31.6159	39.4263	1266.32	1443.8	479.496	648.154	92.76	75.7382	4.9732	6.65318	1076.94	289.254
500	PrAlO3	-3.65621	3.0384	6.58391	221	108.899	5.36015	5.3602	5.36024	59.9997	59.9994	59.9996	10	19.2	19.994	13.2	4.26146	3.4	2.33238	43.1775	49.0498	16.576	3.54767	0.98	0.502593	1.103	0.227587	193.4	57.221	1.012	0.501135	2.612	1.02539	111.502	39.5446	1.45e-07	2.77e-07	49.6159	92.8281	1325.12	1531.99	461.174	505.219	92.76	75.7382	3.6532	4.37078	1008.7	373.032
501	PrAlO3	-3.67418	4.1325	6.52163	167	109.939	5.35772	5.35772	5.35772	60.484	60.484	60.484	10	19.2	19.994	13.2	4.26146	3.4	2.33238	43.1775	49.0498	16.576	3.54767	0.98	0.502593	1.103	0.227587	193.4	57.221	1.012	0.501135	2.612	1.02539	111.502	39.5446	1.45e-07	2.77e-07	49.6159	92.8281	1325.12	1531.99	461.174	505.219	92.76	75.7382	3.6532	4.37078	1008.7	373.032
502	PrCoO3	-2.57412	0.0467	7.02869	62	234.209	5.53425	5.48583	7.71442	90	90	90	20	22	19.9098	12.4	4.58694	3.6	2.33238	49.5678	48.6029	15.91	4.80827	1	0.514782	1.12167	0.192902	196.4	59.1594	1	0.496226	2.666	0.977171	115.924	32.0186	1.52e-07	2.75e-07	22.6159	39.0169	1406.72	1616.48	628.08	724.11	92.76	75.7382	4.7532	6.28066	1045.28	336.093
503	PrCoO3	-2.42717	0.089	7.38978	221	55.6913	3.81882	3.81882	3.81882	90	90	90	5	22	19.9098	12.4	4.58694	3.6	2.33238	49.5678	48.6029	15.91	4.80827	1	0.514782	1.12167	0.192902	196.4	59.1594	1	0.496226	2.666	0.977171	115.924	32.0186	1.52e-07	2.75e-07	22.6159	39.0169	1406.72	1616.48	628.08	724.11	92.76	75.7382	4.7532	6.28066	1045.28	336.093
504	PrCrO3	-3.00988	2.2734	6.70152	221	59.692	3.90816	3.90816	3.90816	90	90	90	5	21.4	19.7949	11.8	5.15364	3.6	2.33238	48.1804	48.4144	16.022	4.59346	1.01	0.52192	1.156	0.132906	197.4	59.9253	1.024	0.507133	2.622	1.01576	116.009	31.8799	1.65e-07	2.72e-07	21.4159	36.6382	1355.52	1562.01	710.48	859.856	92.76	75.7382	5.6132	7.87995	1023.78	356.451
505	PrFeO3	-2.87245	1.5865	6.51873	62	249.385	5.54043	5.69653	7.90162	90	90	90	20	21.8	19.8635	12.2	4.74974	3.6	2.33238	48.9502	48.4994	15.994	4.64708	1.01	0.52192	1.1385	0.162631	197.2	59.7675	1.012	0.501135	2.656	0.985385	106.063	49.4031	1.6e-07	2.73e-07	18.6159	31.1006	1393.52	1601.99	636.68	737.724	92.76	75.7382	4.2732	5.42027	1045.7	335.738
506	PrGaO3	-3.05067	3.3909	7.09337	62	242.177	5.50864	5.60954	7.83722	90	90	90	20	22.8	20.1732	13.2	4.26146	3.6	2.33238	51.7258	49.2066	16.936	2.89304	0.99	0.508331	1.12	0.195959	194.8	58.0565	1.01	0.50024	2.652	0.988765	111.447	39.6406	1.68e-07	2.71e-07	8.41595	11.453	1262.12	1475.82	335.062	446.922	92.76	75.7382	2.6312	2.97959	1008.96	372.732
507	PrLuO3	-3.9315	4.8752	8.33583	62	289.941	5.77056	6.01033	8.35975	90	90	90	20	30.8	28.1808	14	4.51664	4.4	2.93939	72.7746	70.3643	18.132	1.34388	1.08	0.588727	1.1682	0.113969	201	63.1316	1.112	0.58029	2.544	1.09826	109.711	42.7355	2.56e-07	3.16e-07	5.81595	7.15368	1501.72	1729.11	659.48	774.51	92.76	75.7382	5.9132	8.449	997.9	385.919
508	PrMnO3	-2.9604	0.1004	6.43187	62	251.816	5.52176	5.90961	7.71698	90	90	90	20	21.6	19.8252	12	4.93964	3.6	2.33238	48.7688	48.475	16.046	4.54754	1.01	0.52192	1.09767	0.237645	197.4	59.9253	1.022	0.506059	2.6	1.03732	103.149	54.8435	4.28e-07	5.74e-07	4.17595	5.34134	1233.52	1453.21	578.28	648.629	92.76	75.7382	4.1532	5.21061	1036.66	343.754
509	PrNiO3	-2.31325	0.0363	7.08715	62	232.053	5.45916	5.48764	7.74595	90	90	90	20	22.2	19.964	12.6	4.45421	3.6	2.33238	49.5198	48.5937	15.894	4.83902	1	0.514782	1.116	0.203332	196.4	59.1594	0.998	0.495516	2.672	0.972407	125.457	19.9074	1.54e-07	2.74e-07	20.8159	35.4499	1403.92	1613.38	620.08	711.584	92.76	75.7382	4.9532	6.64721	1040.62	340.148
510	PrRhO3	-2.48843	0.6013	7.6233	62	254.254	5.44468	5.91698	7.89216	90	90	90	20	25.6	22.0055	12.4	4.58694	3.8	2.4	58.3623	53.2573	16.232	4.19328	1	0.514782	1.117	0.201484	197.2	59.7675	1.032	0.511719	2.746	0.924502	125.09	20.1754	1.49e-07	2.76e-07	32.6159	58.9067	1560.32	1805.07	721.88	879.419	92.76	75.7382	5.8532	8.33484	1037.14	343.31
511	PrScO3	-3.89664	4.2587	5.7951	62	268.045	5.64313	5.85554	8.11187	90	90	90	20	20.8	19.7525	11.2	5.9127	3.6	2.33238	46.7724	48.3853	17.576	1.8531	1.05	0.556776	1.145	0.151327	200	62.1739	1.082	0.550142	2.562	1.07778	106.769	48.0981	2.5e-07	3.1e-07	5.81595	7.15368	1387.32	1595.29	637.28	738.68	92.76	75.7382	4.7132	6.20784	1019.8	360.656
512	RbBrO3	-1.06712	4.1678	3.60692	160	98.2305	4.62563	4.62563	4.62563	85.8525	85.8525	85.8525	5	19.2	13.7317	13.2	6.11228	3	1.26491	42.674	32.7169	25.524	15.147	1.06	0.679264	1.2645	0.245929	191.4	66.283	1.048	0.587993	2.82	1.01713	158.87	90.4953	2e+17	4e+17	11.6399	23.1801	312.72	337.397	148.532	115.742	628.56	751.041	1.7312	2.1725	1096.38	353.113
513	RbIO3	-1.38798	3.1835	4.36407	160	99.0716	4.62821	4.62821	4.62821	88.783	88.783	88.783	5	22.8	18.8191	13.2	6.11228	3.2	1.46969	52.0741	46.0844	26.712	14.8805	1.11	0.693109	1.34267	0.158751	195	66.3807	1.086	0.600653	2.76	1.01595	152.993	79.8768	200000000000000	400000000000000	11.7057	23.1477	337.8	342.52	172.742	146.352	675.16	754.176	2.1232	2.91965	1070.08	353.788
514	RbNO3	-1.48957	2.9593	2.4144	155	101.427	4.70898	4.70898	4.70898	98.2998	81.7002	98.2998	5	13.6	11.7064	12.8	5.9127	2.6	1.2	29.4945	27.9973	24.276	15.8114	0.96	0.69527	1.214	0.330551	187.4	67.0868	0.956	0.597615	2.836	1.01984	93.9624	59.4578	2.66e-08	5.32e-08	11.6211	23.1894	261.792	349.639	107.982	102.289	536.6	778.278	0.6432	0.775245	1148.8	374.49
515	RbNO3	-1.4831	3.0132	2.59167	167	188.978	9.14735	6.15811	6.15811	60	47.6845	47.6845	10	13.6	11.7064	12.8	5.9127	2.6	1.2	29.4945	27.9973	24.276	15.8114	0.96	0.69527	1.214	0.330551	187.4	67.0868	0.956	0.597615	2.836	1.01984	93.9624	59.4578	2.66e-08	5.32e-08	11.6211	23.1894	261.792	349.639	107.982	102.289	536.6	778.278	0.6432	0.775245	1148.8	374.49
516	RbNbO3	-2.83123	2.8197	4.28291	12	351.07	6.52622	6.52622	8.33204	86.5961	93.4039	97.0692	20	20.4	15.2394	10.8	6.49307	3.2	1.46969	45.2745	35.9316	23.734	16.2115	1.12	0.697567	1.252	0.265812	205.4	70.896	1.126	0.623782	2.548	1.11997	111.639	38.2521	5.7e-08	7.01e-08	22.4159	27.4504	1249.72	1913.59	645.372	1057.04	511.36	793.084	5.9312	10.4622	998.82	392.771
517	RbNbO3	-2.77252	1.3563	5.45864	221	68.8633	4.09886	4.09886	4.09886	90	90	90	5	20.4	15.2394	10.8	6.49307	3.2	1.46969	45.2745	35.9316	23.734	16.2115	1.12	0.697567	1.252	0.265812	205.4	70.896	1.126	0.623782	2.548	1.11997	111.639	38.2521	5.7e-08	7.01e-08	22.4159	27.4504	1249.72	1913.59	645.372	1057.04	511.36	793.084	5.9312	10.4622	998.82	392.771
518	RbNbO3	-2.85556	3.3068	4.08858	2	367.756	5.18071	8.6202	9.16664	115.042	93.4835	94.4801	20	20.4	15.2394	10.8	6.49307	3.2	1.46969	45.2745	35.9316	23.734	16.2115	1.12	0.697567	1.252	0.265812	205.4	70.896	1.126	0.623782	2.548	1.11997	111.639	38.2521	5.7e-08	7.01e-08	22.4159	27.4504	1249.72	1913.59	645.372	1057.04	511.36	793.084	5.9312	10.4622	998.82	392.771
519	RbTaO3	-3.053	4.153	5.71171	2	365.633	9.11196	8.57985	5.17378	94.5826	93.7414	114.194	20	26.8	25.6858	10.8	6.49307	3.4	1.74356	62.8828	64.8747	23.738	16.2083	1.12	0.697567	1.252	0.265812	205.6	71.0397	1.13	0.62661	2.528	1.13748	100.176	50.2193	5.36e-08	6.56e-08	23.0159	28.1579	1392.52	2195.3	753.372	1272.23	511.36	793.084	7.7712	14.135	1020.6	375.584
520	RbTaO3	-3.05336	3.5412	6.06398	12	344.392	6.48784	6.48784	8.27244	86.4528	86.4528	82.9512	20	26.8	25.6858	10.8	6.49307	3.4	1.74356	62.8828	64.8747	23.738	16.2083	1.12	0.697567	1.252	0.265812	205.6	71.0397	1.13	0.62661	2.528	1.13748	100.176	50.2193	5.36e-08	6.56e-08	23.0159	28.1579	1392.52	2195.3	753.372	1272.23	511.36	793.084	7.7712	14.135	1020.6	375.584
521	RbTaO3	-3.0003	2.3882	7.67216	160	68.0508	4.08267	4.08267	4.08267	89.9693	89.9693	89.9693	5	26.8	25.6858	10.8	6.49307	3.4	1.74356	62.8828	64.8747	23.738	16.2083	1.12	0.697567	1.252	0.265812	205.6	71.0397	1.13	0.62661	2.528	1.13748	100.176	50.2193	5.36e-08	6.56e-08	23.0159	28.1579	1392.52	2195.3	753.372	1272.23	511.36	793.084	7.7712	14.135	1020.6	375.584
522	RbTaO3	-2.99665	2.0024	7.73708	221	67.4798	4.07122	4.07122	4.07122	90	90	90	5	26.8	25.6858	10.8	6.49307	3.4	1.74356	62.8828	64.8747	23.738	16.2083	1.12	0.697567	1.252	0.265812	205.6	71.0397	1.13	0.62661	2.528	1.13748	100.176	50.2193	5.36e-08	6.56e-08	23.0159	28.1579	1392.52	2195.3	753.372	1272.23	511.36	793.084	7.7712	14.135	1020.6	375.584
523	RbUO3	-3.31232	0.4523	7.43688	221	82.949	4.36118	4.36118	4.36118	90	90	90	5	30.6	32.6901	11	6.32456	4	2.75681	74.299	86.1728	24.066	15.9589	1.18	0.735255	1.28625	0.213907	215.2	80.0135	1.18	0.669059	2.504	1.15996	93.9624	59.4578	8.26e-08	1.11e-07	17.0159	23.0013	1086.32	1592.95	376.432	524.024	511.36	793.084	3.3712	5.36878	987.92	402.868
524	RbVO3	-2.06609	0.2498	5.10235	221	60.0147	3.91519	3.91519	3.91519	90	90	90	5	16.8	11.6516	10.8	6.49307	3	1.26491	36.8815	27.8083	23.232	16.6366	1.1	0.689202	1.2435	0.279802	202.6	69.0959	1.102	0.60875	2.554	1.11495	104.082	45.2005	6.66e-08	8.43e-08	17.8159	23.4007	982.32	1390.36	531.972	831.524	511.36	793.084	5.1312	8.86722	998.58	392.983
525	SbHO3	-1.6249	1.0685	3.89375	141	291.302	7.36029	7.62492	7.36029	58.8033	62.3934	58.8033	20	15.2	18.1041	12.8	5.9127	2.4	1.35647	34.1532	44.1865	16.338	2.47992	0.7	0.398748	0.922	0.490159	163.4	43.3848	0.728	0.358128	2.914	0.64596	119.324	27.9727	8e-08	1.6e-07	4.85205	9.57416	430.176	715.425	216.438	344.034	99.36	68.455	4.1848	7.75869	1217	191.5
526	ScAlO3	-3.68496	4.5919	4.16931	62	191.07	4.97364	5.2642	7.2977	90	90	90	20	11.6	5.08331	12.8	5.03587	2.6	0.8	23.9871	11.3143	15.416	2.85809	0.93	0.419047	1.068	0.244348	186.6	46.0243	0.95	0.395474	2.658	0.961008	96.558	54.9129	1.15e-07	2.18e-07	50.2159	92.5989	1233.12	1403.24	582.374	703.587	92.76	75.7382	5.4732	6.64618	1029.9	347.169
527	ScBO3	-3.45218	4.118	3.34691	167	102.964	5.85527	5.85527	5.85527	48.4092	48.4092	48.4092	10	10	5.62139	12.8	5.03587	2.4	0.8	20.753	12.2671	14.294	5.03565	0.85	0.387298	1.015	0.335559	180	42.2564	0.87	0.368239	2.744	0.879127	93.6034	58.0874	200000000000	400000000000	8.61595	11.08	1514.72	1778.83	865.48	1007.19	92.76	75.7382	13.3332	19.325	1074.52	296.847
528	ScBiO3	-2.78754	2.7215	7.47687	2	268.227	5.60062	5.90965	8.10409	90.03	90.0091	89.95	20	25.6	29.1383	13.2	5.11468	3.2	1.6	60.3869	75.1384	17.678	2.03305	1	0.489898	1.14	0.154434	197.6	58.7115	1.002	0.44427	2.74	0.88236	106.39	48.2139	3.7e-07	5.11e-07	4.81595	6.38804	1042.12	1232.68	504.56	681.626	92.76	75.7382	5.5132	6.67804	1055	316.759
529	ScBiO3	-2.46202	0.6929	7.40501	221	67.7074	4.07582	4.07574	4.07582	90	90	90	5	25.6	29.1383	13.2	5.11468	3.2	1.6	60.3869	75.1384	17.678	2.03305	1	0.489898	1.14	0.154434	197.6	58.7115	1.002	0.44427	2.74	0.88236	106.39	48.2139	3.7e-07	5.11e-07	4.81595	6.38804	1042.12	1232.68	504.56	681.626	92.76	75.7382	5.5132	6.67804	1055	316.759
530	ScBiO3	-2.78503	2.6869	7.10114	9	282.419	5.79571	5.79571	10.1495	73.7884	73.7884	61.1274	20	25.6	29.1383	13.2	5.11468	3.2	1.6	60.3869	75.1384	17.678	2.03305	1	0.489898	1.14	0.154434	197.6	58.7115	1.002	0.44427	2.74	0.88236	106.39	48.2139	3.7e-07	5.11e-07	4.81595	6.38804	1042.12	1232.68	504.56	681.626	92.76	75.7382	5.5132	6.67804	1055	316.759
531	ScBiO3	-2.79742	3.0834	7.08515	161	141.528	5.78308	5.91904	5.78314	119.255	59.9942	119.254	10	25.6	29.1383	13.2	5.11468	3.2	1.6	60.3869	75.1384	17.678	2.03305	1	0.489898	1.14	0.154434	197.6	58.7115	1.002	0.44427	2.74	0.88236	106.39	48.2139	3.7e-07	5.11e-07	4.81595	6.38804	1042.12	1232.68	504.56	681.626	92.76	75.7382	5.5132	6.67804	1055	316.759
532	ScBiO3	-2.78485	2.6631	7.10662	5	282.201	5.79552	5.79552	10.1426	73.7908	73.7908	61.1231	20	25.6	29.1383	13.2	5.11468	3.2	1.6	60.3869	75.1384	17.678	2.03305	1	0.489898	1.14	0.154434	197.6	58.7115	1.002	0.44427	2.74	0.88236	106.39	48.2139	3.7e-07	5.11e-07	4.81595	6.38804	1042.12	1232.68	504.56	681.626	92.76	75.7382	5.5132	6.67804	1055	316.759
533	ScCrO3	-3.13228	2.5386	4.61775	62	208.496	5.09373	5.41385	7.56057	90	90	90	20	13.8	7.16659	11.4	5.71314	2.8	0.979796	28.99	16.0652	14.862	3.92394	0.96	0.445421	1.121	0.171126	190.6	49.8943	0.962	0.40489	2.668	0.95025	101.066	51.0167	1.35e-07	2.13e-07	22.0159	36.5198	1263.52	1437.9	831.68	958.493	92.76	75.7382	7.4332	8.94579	1044.98	328.316
534	ScFeO3	-2.86636	1.5712	4.65712	14	212.223	5.10201	5.42055	7.67374	89.997	89.9869	89.998	20	14.2	7.75629	11.8	5.38145	2.8	0.979796	29.7598	17.2012	14.834	3.97842	0.96	0.445421	1.1035	0.191948	190.4	49.6774	0.95	0.395474	2.702	0.916	91.1194	61.0718	1.3e-07	2.14e-07	19.2159	31.0153	1301.52	1483.59	757.88	861.094	92.76	75.7382	6.0932	7.2243	1066.9	304.179
535	ScGaO3	-3.05611	4.0845	5.22102	62	206.957	5.06465	5.38397	7.58976	90	90	90	20	15.2	9.36803	12.8	5.03587	2.8	0.979796	32.5354	21.7141	15.776	2.18805	0.94	0.427083	1.085	0.217945	188	47.261	0.948	0.394025	2.698	0.919835	96.5036	54.9673	1.38e-07	2.13e-07	9.01595	11.7522	1170.12	1337.36	456.262	685.636	92.76	75.7382	4.4512	6.13726	1030.16	346.831
536	ScTlO3	-2.47242	0.928	7.70305	14	256.387	5.51815	5.68152	8.17785	90	90.1259	90	20	25.2	28.3507	12.8	5.03587	3.2	1.6	59.4675	73.3207	16.86	0.931579	1.06	0.571314	1.1995	0.159737	193.6	53.4026	0.99	0.431277	2.66	0.958833	95.4806	56.0191	1.4e-07	2.13e-07	12.4159	17.8954	1023.92	1221.43	511.08	682.132	92.76	75.7382	4.1732	6.11081	1032.28	344.087
537	ScVO3	-3.20699	1.5053	4.4417	62	215.183	5.39992	7.81945	5.09618	90	90	90	20	13.6	6.88767	11.2	5.9127	2.8	0.979796	28.7791	15.7659	15.08	3.50141	0.95	0.43589	1.0885	0.212777	190	49.2504	0.99	0.431277	2.662	0.956669	98.3256	53.2373	1.5e-07	2.14e-07	9.41595	12.4395	1410.72	1627.56	832.28	959.338	92.76	75.7382	7.8932	9.6382	1044.58	328.795
538	SiPbO3	-2.18709	1.1781	8.93326	221	52.6575	3.74818	3.74818	3.74818	90	90	90	5	24	29.093	15.2	0.979796	3	1.54919	56.6567	75.417	16.48	2.23732	0.94	0.471593	1.0885	0.279373	184.6	43.7977	0.902	0.335523	2.91	0.663204	118.223	41.6639	0.000200042	0.000399979	37.0159	58.0932	1093.12	1281.11	490.402	634.545	92.76	75.7382	11.1272	19.6156	1088.22	276.21
539	SiSnO3	-2.14187	1.777	6.323	221	51.1565	3.71222	3.71222	3.71222	90	90	90	5	17.6	16.3658	15.2	0.979796	2.8	1.16619	38.9587	40.1494	16.086	2.05521	0.87	0.348712	1.03	0.296243	182.2	40.1019	0.892	0.319399	2.836	0.739989	132.659	13.045	0.000200023	0.000399989	43.4159	59.2694	1263.72	1440.35	471.296	632.374	92.76	75.7382	11.5732	19.491	1086.82	278.106
540	SmAlO3	-3.71427	4.7681	6.9612	62	215.012	5.356	5.32243	7.54246	90	90	90	20	19.8	21.1887	13.8	3.1241	3.4	2.33238	45.0679	52.8176	16.412	3.36275	0.98	0.502593	1.1368	0.231212	192.4	55.5071	1.002	0.483504	2.62	1.01388	92.938	60.2983	1.93e-07	3.73e-07	49.6159	92.8281	1027.72	1170.33	488.574	546.969	92.76	75.7382	3.9932	4.66625	1012.2	368.551
541	SmCoO3	-2.61771	0.0326	7.47626	62	228.586	5.32151	5.61747	7.64671	90	90	90	20	22.6	21.0295	13	3.68782	3.6	2.33238	51.4583	52.1717	15.746	4.65006	1	0.514782	1.15547	0.193939	195.4	57.5555	0.99	0.478163	2.674	0.964647	97.3602	57.1094	2e-07	3.71e-07	22.6159	39.0169	1109.32	1297.79	655.48	747.742	92.76	75.7382	5.0932	6.43186	1048.78	330.726
542	SmCoO3	-2.46703	0.6163	8.05676	221	53.0291	3.75697	3.75697	3.75697	90	90	90	5	22.6	21.0295	13	3.68782	3.6	2.33238	51.4583	52.1717	15.746	4.65006	1	0.514782	1.15547	0.193939	195.4	57.5555	0.99	0.478163	2.674	0.964647	97.3602	57.1094	2e-07	3.71e-07	22.6159	39.0169	1109.32	1297.79	655.48	747.742	92.76	75.7382	5.0932	6.43186	1048.78	330.726
543	SmCrO3	-2.9607	1.7362	7.13057	221	58.3015	3.87757	3.87757	3.87757	90	90	90	5	22	20.938	12.4	4.45421	3.6	2.33238	50.0709	52.0465	15.858	4.43173	1.01	0.52192	1.1898	0.125476	196.4	58.3596	1.014	0.489963	2.63	1.00407	97.4456	57.0596	2.13e-07	3.67e-07	21.4159	36.6382	1058.12	1216.82	737.88	877.28	92.76	75.7382	5.9532	7.96436	1027.28	351.609
544	SmCrO3	-2.97567	2.2433	7.1212	221	58.3782	3.87927	3.87927	3.87927	90	90	90	5	22	20.938	12.4	4.45421	3.6	2.33238	50.0709	52.0465	15.858	4.43173	1.01	0.52192	1.1898	0.125476	196.4	58.3596	1.014	0.489963	2.63	1.00407	97.4456	57.0596	2.13e-07	3.67e-07	21.4159	36.6382	1058.12	1216.82	737.88	877.28	92.76	75.7382	5.9532	7.96436	1027.28	351.609
546	SmCuO3	-2.42246	0.1218	7.12204	62	244.257	6.32977	7.19741	5.36146	90	90	90	20	23	21.1282	13.4	3.32265	3.6	2.33238	52.3808	52.3362	15.834	4.47847	1	0.514782	1.1658	0.173316	195	57.2503	0.998	0.481597	2.678	0.961382	108.417	54.8633	1.91e-07	3.74e-07	82.6159	158.772	1109.32	1297.79	573.434	635.207	92.76	75.7382	4.4732	5.3976	1045.8	333.367
547	SmDyO3	-3.87916	4.5279	8.04255	62	298.024	6.05917	8.47749	5.80191	90	90	90	20	30.4	27.4634	13.6	3.2	4.4	2.93939	72.1716	68.9037	18.214	1.08998	1.08	0.588727	1.228	0.049964	203.6	65.6737	1.114	0.580744	2.542	1.09993	84.5856	69.0639	3.73e-07	4.57e-07	4.81595	5.89975	1037.32	1184.87	637.88	721.939	92.76	75.7382	4.0732	4.78253	1011.3	369.615
547	SmErO3	-3.91689	4.6071	8.3605	62	290.471	6.00023	8.42914	5.74318	90	90	90	20	30.8	27.9886	14	3.09839	4.4	2.93939	73.1234	70.1662	18.104	1.03022	1.08	0.588727	1.2078	0.0897071	203.2	65.2055	1.108	0.573739	2.546	1.09515	84.5856	69.0639	3.6e-07	4.42e-07	5.61595	6.8747	1097.52	1278.85	662.28	757.913	92.76	75.7382	5.8332	7.7458	1014.56	365.787
548	SmFeO3	-2.69513	0.6885	7.0662	221	59.7371	3.90914	3.90914	3.90914	90	90	90	5	22.4	20.9914	12.8	3.91918	3.6	2.33238	50.8406	52.0978	15.83	4.48626	1.01	0.52192	1.1723	0.16035	196.2	58.1942	1.002	0.483504	2.664	0.973049	87.4994	65.657	2.08e-07	3.68e-07	18.6159	31.1006	1096.12	1276.62	664.08	760.624	92.76	75.7382	4.6132	5.62387	1049.2	330.361
549	SmFeO3	-2.91741	1.6488	6.986	62	241.692	5.43552	5.69638	7.80588	90	90	90	20	22.4	20.9914	12.8	3.91918	3.6	2.33238	50.8406	52.0978	15.83	4.48626	1.01	0.52192	1.1723	0.16035	196.2	58.1942	1.002	0.483504	2.664	0.973049	87.4994	65.657	2.08e-07	3.68e-07	18.6159	31.1006	1096.12	1276.62	664.08	760.624	92.76	75.7382	4.6132	5.62387	1049.2	330.361
550	SmGaO3	-2.92807	2.7794	7.72739	221	57.608	3.86214	3.86214	3.86214	90	90	90	5	23.4	21.2565	13.8	3.1241	3.6	2.33238	53.6162	52.6571	16.772	2.68512	0.99	0.508331	1.1538	0.197266	193.8	56.3929	1	0.482535	2.66	0.976504	92.8836	60.3445	2.16e-07	3.66e-07	8.41595	11.453	964.72	1078.54	362.462	500.579	92.76	75.7382	2.9712	3.49902	1012.46	368.245
551	SmHoO3	-3.8988	4.5947	8.22547	62	293.36	6.02411	8.44694	5.76512	90	90	90	20	30.6	27.7244	13.8	3.1241	4.4	2.93939	72.6577	69.5448	18.16	1.05535	1.08	0.588727	1.21	0.0853487	204	66.1483	1.112	0.578391	2.544	1.09754	84.5856	69.0639	3.51e-07	4.31e-07	5.81595	7.15368	1067.92	1232.07	648.68	737.68	92.76	75.7382	5.2532	6.7101	1012.9	367.727
552	SmInO3	-2.92121	2.6397	7.54323	62	275.766	5.95257	8.23892	5.62297	90	90	90	20	27	23.6305	13.8	3.1241	3.8	2.4	62.6352	58.2123	17.564	1.35767	1.04	0.547175	1.1898	0.125476	196	58.031	1.038	0.506059	2.654	0.981786	90.3656	62.6549	2.04e-07	3.69e-07	19.0159	31.8903	938.32	1042.21	387.83	500.132	92.76	75.7382	2.5052	3.26666	1008.36	373.132
553	SmMnO3	-3.00627	0.4542	6.89649	62	243.955	5.41927	5.92897	7.59258	90	90	90	20	22.2	20.9609	12.6	4.17612	3.6	2.33238	50.6592	52.0816	15.882	4.38502	1.01	0.52192	1.13147	0.241865	196.4	58.3596	1.012	0.488811	2.608	1.02605	84.5856	69.0639	4.76e-07	6.04e-07	4.17595	5.34134	936.12	1039.24	605.68	676.927	92.76	75.7382	4.4932	5.42962	1040.16	338.598
554	SmNiO3	-2.35784	0.0401	7.54267	62	226.362	5.34675	5.5479	7.63107	90	90	90	20	22.8	21.0751	13.2	3.48712	3.6	2.33238	51.4103	52.1649	15.73	4.6813	1	0.514782	1.1498	0.205251	195.4	57.5555	0.988	0.477385	2.68	0.959771	106.893	54.6491	2.02e-07	3.7e-07	20.8159	35.4499	1106.52	1293.28	647.48	735.917	92.76	75.7382	5.2932	6.78024	1044.12	334.894
555	SmRhO3	-2.54427	0.7336	8.16694	62	245.017	5.35539	5.8853	7.77386	90	90	90	20	26.2	22.9295	13	3.68782	3.8	2.4	60.2527	56.2382	16.068	4.02404	1	0.514782	1.1508	0.203255	196.2	58.1942	1.022	0.49487	2.754	0.910551	106.526	54.6229	1.97e-07	3.72e-07	32.6159	58.9067	1262.92	1555.92	749.28	896.114	92.76	75.7382	6.1932	8.40499	1040.64	338.141
556	SmScO3	-3.93773	4.3579	6.22404	62	259.659	5.55234	5.81335	8.04454	90	90	90	20	21.4	20.9151	11.8	5.38145	3.6	2.33238	48.6628	52.0706	17.412	1.5761	1.05	0.556776	1.1788	0.14739	199	60.7091	1.072	0.53544	2.57	1.06722	88.2056	64.8832	2.98e-07	3.85e-07	5.81595	7.15368	1089.92	1266.74	664.68	761.529	92.76	75.7382	5.0532	6.36292	1023.3	355.911
557	SmTlO3	-2.42545	0.8895	8.9407	62	299.202	6.07196	8.64172	5.7021	90	90	90	20	33.4	31.6834	13.8	3.1241	4	2.52982	80.5483	80.8807	17.856	1.06338	1.11	0.62482	1.2683	0.0342719	199.4	61.1019	1.042	0.509133	2.622	1.0119	91.8606	61.2438	2.18e-07	3.66e-07	11.8159	17.8153	818.52	898.09	417.28	506.034	92.76	75.7382	2.6932	3.3311	1014.58	365.764
558	SmTmO3	-3.94205	4.6315	8.45239	62	288.63	5.99297	8.4033	5.73125	90	90	90	20	31	28.256	14.2	3.1241	4.4	2.93939	73.4585	70.6174	18.232	1.10364	1.08	0.588727	1.2208	0.0640356	203.4	65.4388	1.108	0.573739	2.548	1.09277	104.442	54.6607	3.23e-07	4.05e-07	6.01595	7.44371	913.92	1009.92	665.48	762.737	92.76	75.7382	5.2132	6.64019	1016.04	364.075
559	SmVO3	-2.96106	0.1089	6.93077	221	59.7296	3.90898	3.90898	3.90898	90	90	90	5	21.8	20.9227	12.2	4.74974	3.6	2.33238	49.8599	52.0404	16.076	4.00856	1	0.514782	1.1573	0.190279	195.8	57.8702	1.042	0.509133	2.624	1.00992	94.7056	58.8851	2.28e-07	3.64e-07	8.81595	12.177	1205.32	1456.89	738.48	878.266	92.76	75.7382	6.4132	8.81252	1026.88	352.036
560	SmYO3	-3.87057	4.2039	6.34713	33	300.617	5.87908	6.00963	8.50856	90	90	90	20	25	22.0545	11.8	5.38145	3.8	2.4	57.4528	54.3621	18.388	1.25943	1.09	0.600333	1.2098	0.0857447	202.4	64.2887	1.106	0.57144	2.542	1.09993	90.5098	62.514	3.08e-07	3.92e-07	6.01595	7.44371	1191.12	1432.85	661.68	757.012	92.76	75.7382	4.1332	4.87137	1016.7	363.316
561	SnPbO3	-1.77676	1.7927	8.82874	221	70.3259	4.12767	4.12767	4.12767	90	90	90	5	31.2	30.1622	15.2	0.979796	3.4	1.74356	74.7816	77.2404	17.326	0.624359	1.01	0.514198	1.1465	0.16697	189.2	48.1597	0.954	0.384895	2.922	0.645117	113.069	41.0989	6.5e-08	8.51e-08	20.4159	26.9442	1033.52	1186.4	254.018	245.854	92.76	75.7382	2.4872	2.86251	1072.64	294.388
562	SrCO3	-2.69169	4.6569	3.29549	167	148.775	8.68832	6.91634	6.91634	44.6769	37.2402	37.2403	10	13.6	12.2246	12.8	5.45527	2.6	1.2	29.5258	29.0882	18.262	9.12703	0.9	0.551362	1.08	0.390692	182.2	51.9631	0.914	0.494837	2.764	0.970291	109.867	53.1408	2.03e-06	3.99e-06	35.0159	54.2115	1245.12	1643.28	1002.88	1450.7	92.76	75.7382	25.1332	46.0321	1114.9	296.055
563	SrCeO3	-3.63161	2.2876	5.62881	62	325.374	6.04902	6.20567	8.66781	90	90	90	20	24	20.5913	10.8	6.4	3.8	2.4	55.1468	50.7382	21.342	6.42968	1.13	0.650846	1.236	0.081388	204.4	66.6381	1.132	0.602873	2.478	1.17943	98.0558	55.6835	1.75e-07	2.87e-07	9.21595	13.5745	1111.72	1398.75	456.48	491.988	92.76	75.7382	2.8332	3.29432	1004.58	377.766
564	SrCoO3	-1.98019	0.0985	5.67121	221	56.9649	3.84771	3.84771	3.84771	90	90	90	5	17.8	12.4964	11.8	5.6	3	1.26491	38.9103	29.4899	18.538	8.74339	1.03	0.565332	1.17367	0.203995	194.8	56.6053	1	0.496226	2.63	1.03472	98.2864	55.5389	3.9e-08	5.33e-08	27.0159	38.9248	1025.12	1244.92	596.48	701.198	92.76	75.7382	4.9732	6.37062	1049.78	329.204
565	SrCrO3	-2.58737	0.5876	5.0674	1	860.711	5.55192	5.55632	32.2582	90.0853	89.9242	120.124	70	17.2	12.1062	11.2	6.01332	3	1.26491	37.5229	28.667	18.65	8.59294	1.04	0.571314	1.208	0.136	195.8	57.4331	1.024	0.507133	2.586	1.06976	98.3718	55.4862	5.24e-08	6.42e-08	25.8159	36.6843	973.92	1156.54	678.88	843.744	92.76	75.7382	5.8332	7.92801	1028.28	350.239
566	SrCrO3	-2.59486	0.6901	5.125	1	364.731	5.53154	5.55258	13.6856	89.9937	90.0122	119.808	30	17.2	12.1062	11.2	6.01332	3	1.26491	37.5229	28.667	18.65	8.59294	1.04	0.571314	1.208	0.136	195.8	57.4331	1.024	0.507133	2.586	1.06976	98.3718	55.4862	5.24e-08	6.42e-08	25.8159	36.6843	973.92	1156.54	678.88	843.744	92.76	75.7382	5.8332	7.92801	1028.28	350.239
567	SrCrO3	-2.58275	0.7904	5.03468	6	247.516	5.57573	5.54336	9.27996	89.9975	90.0047	120.351	20	17.2	12.1062	11.2	6.01332	3	1.26491	37.5229	28.667	18.65	8.59294	1.04	0.571314	1.208	0.136	195.8	57.4331	1.024	0.507133	2.586	1.06976	98.3718	55.4862	5.24e-08	6.42e-08	25.8159	36.6843	973.92	1156.54	678.88	843.744	92.76	75.7382	5.8332	7.92801	1028.28	350.239
568	SrCrO3	-2.55912	0.0312	5.27951	221	59.0094	3.8932	3.8932	3.8932	90	90	90	5	17.2	12.1062	11.2	6.01332	3	1.26491	37.5229	28.667	18.65	8.59294	1.04	0.571314	1.208	0.136	195.8	57.4331	1.024	0.507133	2.586	1.06976	98.3718	55.4862	5.24e-08	6.42e-08	25.8159	36.6843	973.92	1156.54	678.88	843.744	92.76	75.7382	5.8332	7.92801	1028.28	350.239
569	SrGeO3	-2.75835	3.3373	4.42724	2	937.345	8.77188	10.0748	11.3103	73.905	89.9115	77.9042	60	18.8	13.3626	12.8	5.45527	3	1.26491	41.6516	31.7726	19.93	7.15241	1.01	0.555338	1.174	0.203332	192.6	54.9967	1.004	0.497739	2.656	1.01703	109.3	53.0257	0.000100027	0.000199987	19.0159	24.5641	1003.72	1207.71	485.16	529.547	92.76	75.7382	8.0932	12.2302	1050.1	328.923
570	SrHfO3	-3.81797	3.6761	7.49019	127	139.273	4.17305	5.77705	5.77705	90	90	90	10	26.8	25.4118	10.8	6.4	3.4	1.74356	62.8216	64.1422	19.892	7.1862	1.07	0.592959	1.19	0.171581	197.4	58.8748	1.092	0.559657	2.514	1.1395	85.782	67.6065	9.5e-08	1.33e-07	11.6159	14.6925	1360.32	1859.38	744.08	961.589	92.76	75.7382	6.8332	9.80749	1029.4	349.044
571	SrHfO3	-3.8308	4.1704	7.50874	62	277.857	5.80058	5.8325	8.21286	90	90	90	20	26.8	25.4118	10.8	6.4	3.4	1.74356	62.8216	64.1422	19.892	7.1862	1.07	0.592959	1.19	0.171581	197.4	58.8748	1.092	0.559657	2.514	1.1395	85.782	67.6065	9.5e-08	1.33e-07	11.6159	14.6925	1360.32	1859.38	744.08	961.589	92.76	75.7382	6.8332	9.80749	1029.4	349.044
573	SrHfO3	-3.79787	3.7293	7.34426	221	71.02	4.14121	4.14121	4.14121	90	90	90	5	26.8	25.4118	10.8	6.4	3.4	1.74356	62.8216	64.1422	19.892	7.1862	1.07	0.592959	1.19	0.171581	197.4	58.8748	1.092	0.559657	2.514	1.1395	85.782	67.6065	9.5e-08	1.33e-07	11.6159	14.6925	1360.32	1859.38	744.08	961.589	92.76	75.7382	6.8332	9.80749	1029.4	349.044
573	SrHfO3	-3.82635	3.9571	7.49368	63	278.415	5.8169	5.8169	8.22876	90	90	90.6164	20	26.8	25.4118	10.8	6.4	3.4	1.74356	62.8216	64.1422	19.892	7.1862	1.07	0.592959	1.19	0.171581	197.4	58.8748	1.092	0.559657	2.514	1.1395	85.782	67.6065	9.5e-08	1.33e-07	11.6159	14.6925	1360.32	1859.38	744.08	961.589	92.76	75.7382	6.8332	9.80749	1029.4	349.044
574	SrHfO3	-3.82471	4.0578	7.49165	140	139.245	5.7819	5.7819	5.83647	119.691	119.691	90	10	26.8	25.4118	10.8	6.4	3.4	1.74356	62.8216	64.1422	19.892	7.1862	1.07	0.592959	1.19	0.171581	197.4	58.8748	1.092	0.559657	2.514	1.1395	85.782	67.6065	9.5e-08	1.33e-07	11.6159	14.6925	1360.32	1859.38	744.08	961.589	92.76	75.7382	6.8332	9.80749	1029.4	349.044
575	SrHfO3	-3.82809	3.9893	7.49339	74	139.213	5.8271	5.81034	5.81034	60.299	59.9045	59.9045	10	26.8	25.4118	10.8	6.4	3.4	1.74356	62.8216	64.1422	19.892	7.1862	1.07	0.592959	1.19	0.171581	197.4	58.8748	1.092	0.559657	2.514	1.1395	85.782	67.6065	9.5e-08	1.33e-07	11.6159	14.6925	1360.32	1859.38	744.08	961.589	92.76	75.7382	6.8332	9.80749	1029.4	349.044
576	SrHfO3	-3.79793	3.7328	7.33551	99	71.1047	4.13942	4.13942	4.14973	90	90	90	5	26.8	25.4118	10.8	6.4	3.4	1.74356	62.8216	64.1422	19.892	7.1862	1.07	0.592959	1.19	0.171581	197.4	58.8748	1.092	0.559657	2.514	1.1395	85.782	67.6065	9.5e-08	1.33e-07	11.6159	14.6925	1360.32	1859.38	744.08	961.589	92.76	75.7382	6.8332	9.80749	1029.4	349.044
577	SrMnO3	-2.49492	0.8109	5.14004	194	246.244	5.53579	5.53579	9.27845	90	90	120	20	17.4	12.2246	11.4	5.8515	3	1.26491	38.1112	28.9864	18.674	8.56112	1.04	0.571314	1.14967	0.251741	195.8	57.4331	1.022	0.506059	2.564	1.08952	85.5118	67.9453	3.15e-07	5.65e-07	8.57595	13.5507	851.92	957.304	546.68	620.415	92.76	75.7382	4.3732	5.34347	1041.16	337.137
578	SrMnO3	-2.50325	0.9944	5.12804	20	246.82	5.53303	5.53303	9.28911	90	90	119.782	20	17.4	12.2246	11.4	5.8515	3	1.26491	38.1112	28.9864	18.674	8.56112	1.04	0.571314	1.14967	0.251741	195.8	57.4331	1.022	0.506059	2.564	1.08952	85.5118	67.9453	3.15e-07	5.65e-07	8.57595	13.5507	851.92	957.304	546.68	620.415	92.76	75.7382	4.3732	5.34347	1041.16	337.137
579	SrMoO3	-2.66681	1.0873	5.70326	74	134.839	5.66248	5.774	5.774	60.0772	60.6369	60.6369	10	20.8	15.7277	11.2	6.01332	3.2	1.46969	46.3116	37.2179	19.08	8.04717	1.05	0.577927	1.175	0.201345	195.8	57.4331	1.056	0.528151	2.686	0.999592	99.946	54.6018	3.8e-08	5.3e-08	34.8159	53.8243	1367.52	1873	822.08	1106.28	92.76	75.7382	8.9332	13.8646	1034.56	343.672
581	SrMoO3	-2.59537	0.034	5.65196	221	68.0316	4.08229	4.08229	4.08229	90	90	90	5	20.8	15.7277	11.2	6.01332	3.2	1.46969	46.3116	37.2179	19.08	8.04717	1.05	0.577927	1.175	0.201345	195.8	57.4331	1.056	0.528151	2.686	0.999592	99.946	54.6018	3.8e-08	5.3e-08	34.8159	53.8243	1367.52	1873	822.08	1106.28	92.76	75.7382	8.9332	13.8646	1034.56	343.672
581	SrPbO3	-2.17163	0.7933	7.39634	62	307.862	5.94929	6.10961	8.46988	90	90	90	20	28.8	29.0269	12.8	5.45527	3.4	1.74356	68.5636	74.6621	20.856	6.55128	1.12	0.64	1.2445	0.0652763	197.6	59.0647	1.054	0.526635	2.72	0.98389	92.536	60.105	6.9e-08	8.78e-08	14.0159	17.1334	789.52	864.316	363.002	403.333	92.76	75.7382	2.6872	3.18734	1040.82	337.464
582	SrSiO3	-3.13375	2.3766	5.37142	221	50.6079	3.6989	3.6989	3.6989	90	90	90	5	15.2	11.6344	12.8	5.45527	2.8	1.16619	32.7407	27.836	19.616	7.45035	0.98	0.545527	1.128	0.294917	190.6	53.8056	0.992	0.493575	2.634	1.03184	112.125	53.8344	0.000200027	0.000399987	37.0159	58.0932	1019.72	1235.49	580.28	674.367	92.76	75.7382	11.7732	19.4481	1055	324.751
583	SrSnO3	-2.64857	1.6118	6.12469	74	137.908	5.79169	5.79169	5.79169	90.4548	119.476	120	10	22.4	18.04	12.8	5.45527	3.2	1.46969	50.8656	43.8194	20.462	6.75173	1.05	0.577927	1.186	0.17951	195.2	56.9294	1.044	0.519446	2.646	1.02355	106.971	52.8064	5e-08	6.16e-08	20.4159	26.9442	960.12	1133.13	343.896	393.775	92.76	75.7382	3.1332	3.57947	1039.42	338.822
584	SrSnO3	-2.65445	1.7365	6.12694	62	275.715	5.81747	5.78638	8.19066	90	90	90	20	22.4	18.04	12.8	5.45527	3.2	1.46969	50.8656	43.8194	20.462	6.75173	1.05	0.577927	1.186	0.17951	195.2	56.9294	1.044	0.519446	2.646	1.02355	106.971	52.8064	5e-08	6.16e-08	20.4159	26.9442	960.12	1133.13	343.896	393.775	92.76	75.7382	3.1332	3.57947	1039.42	338.822
585	SrSnO3	-2.60686	0.9698	6.06148	221	69.6731	4.11486	4.11486	4.11486	90	90	90	5	22.4	18.04	12.8	5.45527	3.2	1.46969	50.8656	43.8194	20.462	6.75173	1.05	0.577927	1.186	0.17951	195.2	56.9294	1.044	0.519446	2.646	1.02355	106.971	52.8064	5e-08	6.16e-08	20.4159	26.9442	960.12	1133.13	343.896	393.775	92.76	75.7382	3.1332	3.57947	1039.42	338.822
586	SrSnO3	-2.64305	1.555	6.13704	140	137.63	5.74259	5.74259	5.82294	119.545	119.545	90	10	22.4	18.04	12.8	5.45527	3.2	1.46969	50.8656	43.8194	20.462	6.75173	1.05	0.577927	1.186	0.17951	195.2	56.9294	1.044	0.519446	2.646	1.02355	106.971	52.8064	5e-08	6.16e-08	20.4159	26.9442	960.12	1133.13	343.896	393.775	92.76	75.7382	3.1332	3.57947	1039.42	338.822
587	SrTeO3	-2.39437	3.4131	4.63827	5	1130.81	5.98131	14.6214	14.8093	64.0723	78.3493	78.1975	60	22.8	18.659	13.2	5.6	3.2	1.46969	52.6436	46.6266	21.296	6.435	1.04	0.571314	1.27867	0.0243676	186.6	52.267	1.038	0.515457	2.674	1.00617	123.544	62.4336	2e-05	4e-05	7.61595	13.7404	637.32	681.567	387.412	420.311	92.76	75.7382	5.2332	6.83324	1071.56	312.517
588	SrTiO3	-3.56917	1.8488	4.97206	140	122.559	5.56773	5.56773	5.57946	119.93	119.93	90	10	16.8	11.9063	10.8	6.4	3	1.26491	36.697	28.2952	19.332	7.75385	1.04	0.571314	1.19033	0.17092	196	57.6056	1.06	0.531263	2.562	1.09139	87.0318	66.0746	1.07e-07	1.56e-07	11.4159	14.5422	1097.12	1372.49	631.08	759.958	92.76	75.7382	5.4732	7.26716	1029.46	348.98
589	SrTiO3	-3.52984	1.7362	4.79793	194	381.019	5.62887	5.62884	13.886	89.9998	90.0003	120	30	16.8	11.9063	10.8	6.4	3	1.26491	36.697	28.2952	19.332	7.75385	1.04	0.571314	1.19033	0.17092	196	57.6056	1.06	0.531263	2.562	1.09139	87.0318	66.0746	1.07e-07	1.56e-07	11.4159	14.5422	1097.12	1372.49	631.08	759.958	92.76	75.7382	5.4732	7.26716	1029.46	348.98
590	SrTiO3	-3.56861	1.7783	4.96612	140	122.705	5.57604	5.57603	5.57861	119.985	119.985	90	10	16.8	11.9063	10.8	6.4	3	1.26491	36.697	28.2952	19.332	7.75385	1.04	0.571314	1.19033	0.17092	196	57.6056	1.06	0.531263	2.562	1.09139	87.0318	66.0746	1.07e-07	1.56e-07	11.4159	14.5422	1097.12	1372.49	631.08	759.958	92.76	75.7382	5.4732	7.26716	1029.46	348.98
591	SrTiO3	-3.56841	1.7673	4.96211	221	61.4022	3.94513	3.94513	3.94513	90	90	90	5	16.8	11.9063	10.8	6.4	3	1.26491	36.697	28.2952	19.332	7.75385	1.04	0.571314	1.19033	0.17092	196	57.6056	1.06	0.531263	2.562	1.09139	87.0318	66.0746	1.07e-07	1.56e-07	11.4159	14.5422	1097.12	1372.49	631.08	759.958	92.76	75.7382	5.4732	7.26716	1029.46	348.98
592	SrVO3	-2.89239	0.2447	5.21886	221	59.3597	3.90089	3.90089	3.90089	90	90	90	5	17	12	11	6.19677	3	1.26491	37.3119	28.5634	18.868	8.30961	1.03	0.565332	1.1755	0.200352	195.2	56.9294	1.052	0.525144	2.58	1.07501	95.6318	57.4061	6.7e-08	8.46e-08	13.2159	16.2031	1121.12	1415.72	679.48	844.812	92.76	75.7382	6.2932	8.78597	1027.88	350.668
593	SrZrO3	-3.6714	3.416	5.23458	63	287.84	5.87599	5.87599	8.337	90	90	90.5669	20	20.4	15.2	10.8	6.4	3.2	1.46969	45.3684	35.9876	20.008	7.08509	1.07	0.592959	1.192	0.167619	197.2	58.687	1.092	0.559657	2.52	1.13315	93.7324	58.9996	1.14e-07	1.68e-07	11.6159	14.6925	1321.52	1786.2	668.48	825.296	92.76	75.7382	5.9332	8.11337	1025.7	353.031
594	SrZrO3	-3.62481	3.3637	5.09028	198	592	8.39667	8.39667	8.39667	90	90	90	40	20.4	15.2	10.8	6.4	3.2	1.46969	45.3684	35.9876	20.008	7.08509	1.07	0.592959	1.192	0.167619	197.2	58.687	1.092	0.559657	2.52	1.13315	93.7324	58.9996	1.14e-07	1.68e-07	11.6159	14.6925	1321.52	1786.2	668.48	825.296	92.76	75.7382	5.9332	8.11337	1025.7	353.031
595	SrZrO3	-3.65987	3.1654	5.22363	127	144.222	5.84256	5.84256	4.22497	90	90	90	10	20.4	15.2	10.8	6.4	3.2	1.46969	45.3684	35.9876	20.008	7.08509	1.07	0.592959	1.192	0.167619	197.2	58.687	1.092	0.559657	2.52	1.13315	93.7324	58.9996	1.14e-07	1.68e-07	11.6159	14.6925	1321.52	1786.2	668.48	825.296	92.76	75.7382	5.9332	8.11337	1025.7	353.031
596	SrZrO3	-3.63121	3.2609	5.05054	99	74.5822	4.17686	4.17686	4.27499	90	90	90	5	20.4	15.2	10.8	6.4	3.2	1.46969	45.3684	35.9876	20.008	7.08509	1.07	0.592959	1.192	0.167619	197.2	58.687	1.092	0.559657	2.52	1.13315	93.7324	58.9996	1.14e-07	1.68e-07	11.6159	14.6925	1321.52	1786.2	668.48	825.296	92.76	75.7382	5.9332	8.11337	1025.7	353.031
597	SrZrO3	-3.62464	3.2114	5.09297	221	73.9608	4.19759	4.19759	4.19759	90	90	90	5	20.4	15.2	10.8	6.4	3.2	1.46969	45.3684	35.9876	20.008	7.08509	1.07	0.592959	1.192	0.167619	197.2	58.687	1.092	0.559657	2.52	1.13315	93.7324	58.9996	1.14e-07	1.68e-07	11.6159	14.6925	1321.52	1786.2	668.48	825.296	92.76	75.7382	5.9332	8.11337	1025.7	353.031
598	SrZrO3	-3.67956	3.6203	5.25225	62	286.871	5.84709	5.91233	8.2983	90	90	90	20	20.4	15.2	10.8	6.4	3.2	1.46969	45.3684	35.9876	20.008	7.08509	1.07	0.592959	1.192	0.167619	197.2	58.687	1.092	0.559657	2.52	1.13315	93.7324	58.9996	1.14e-07	1.68e-07	11.6159	14.6925	1321.52	1786.2	668.48	825.296	92.76	75.7382	5.9332	8.11337	1025.7	353.031
599	SrZrO3	-3.67376	3.4747	5.24437	74	143.651	5.87072	5.87072	5.87072	90.4676	119.719	119.742	10	20.4	15.2	10.8	6.4	3.2	1.46969	45.3684	35.9876	20.008	7.08509	1.07	0.592959	1.192	0.167619	197.2	58.687	1.092	0.559657	2.52	1.13315	93.7324	58.9996	1.14e-07	1.68e-07	11.6159	14.6925	1321.52	1786.2	668.48	825.296	92.76	75.7382	5.9332	8.11337	1025.7	353.031
600	SrZrO3	-3.66698	3.5667	5.23417	140	143.931	5.83718	5.83718	5.90598	119.615	119.615	90	10	20.4	15.2	10.8	6.4	3.2	1.46969	45.3684	35.9876	20.008	7.08509	1.07	0.592959	1.192	0.167619	197.2	58.687	1.092	0.559657	2.52	1.13315	93.7324	58.9996	1.14e-07	1.68e-07	11.6159	14.6925	1321.52	1786.2	668.48	825.296	92.76	75.7382	5.9332	8.11337	1025.7	353.031
601	TaAgO3	-2.42678	1.9156	8.94567	167	125.042	5.65098	5.65098	5.65098	59.1201	59.1201	59.1201	10	28.8	26.7686	12.8	4.35431	3.4	1.74356	67.3629	67.0177	14.64	3.33635	0.97	0.455631	1.13733	0.172284	192	51.4548	0.972	0.412524	2.75	0.855944	115.924	42.8426	3.03e-08	5.27e-08	97.4159	167.75	1687.32	2216.43	937.866	1261.76	92.76	75.7382	9.5932	13.883	1086.2	277.934
602	TaCuO3	-2.52036	1.5612	6.90586	12	281.323	6.43912	6.43912	6.82325	89.827	90.173	96.0625	20	25.2	25.246	12.8	4.35431	3.2	1.6	58.4984	63.9341	14.008	4.27231	0.92	0.393192	1.084	0.215555	189	48.1415	0.944	0.389338	2.744	0.861756	114.631	42.6273	3.04e-08	5.27e-08	91.4159	155.862	1840.32	2288.01	962.434	1268.48	92.76	75.7382	9.9532	13.9458	1089.1	274.264
603	TaHO3	-2.69836	2.7443	4.96209	141	307.812	7.50102	7.50101	7.75523	58.8724	58.8724	62.2552	20	19.6	26.8373	10.8	6.49307	2.6	1.74356	45.9908	67.7279	14.87	3.05494	0.7	0.398748	0.92	0.490551	165.4	47.2508	0.764	0.426408	2.804	0.80978	105.353	45.5784	2.7e-08	5.4e-08	11.452	22.7741	1204.38	2263.47	693.682	1298.26	99.36	68.455	7.4448	14.2782	1202.4	220.7
604	TaTlO3	-2.7038	0.9695	9.24668	15	622.546	7.60943	7.60943	15.169	60.1022	60.1022	60.1084	40	35.6	33.8975	13.2	4.26146	3.6	1.95959	86.6659	86.8651	16.03	2.59057	1.03	0.545527	1.1865	0.185389	193.4	53.1624	0.988	0.428504	2.688	0.92179	98.0742	52.5706	5.7e-08	7e-08	20.6159	25.4555	1549.52	2186.88	806.28	1258.22	92.76	75.7382	8.1732	13.9984	1057.88	317.134
605	TaTlO3	-2.70145	0.4458	9.20814	227	312.576	7.61769	7.61769	7.61769	60	90	120	20	35.6	33.8975	13.2	4.26146	3.6	1.95959	86.6659	86.8651	16.03	2.59057	1.03	0.545527	1.1865	0.185389	193.4	53.1624	0.988	0.428504	2.688	0.92179	98.0742	52.5706	5.7e-08	7e-08	20.6159	25.4555	1549.52	2186.88	806.28	1258.22	92.76	75.7382	8.1732	13.9984	1057.88	317.134
606	TaTlO3	-2.5967	0.6811	10.5725	221	68.0597	4.08285	4.08285	4.08285	90	90	90	5	35.6	33.8975	13.2	4.26146	3.6	1.95959	86.6659	86.8651	16.03	2.59057	1.03	0.545527	1.1865	0.185389	193.4	53.1624	0.988	0.428504	2.688	0.92179	98.0742	52.5706	5.7e-08	7e-08	20.6159	25.4555	1549.52	2186.88	806.28	1258.22	92.76	75.7382	8.1732	13.9984	1057.88	317.134
607	TbAlO3	-3.75734	5.5982	7.39314	62	210.145	5.23635	5.37614	7.46483	90	90	90	20	20.4	22.3839	14.4	2.05913	3.4	2.33238	46.781	56.2333	16.276	3.2267	0.96	0.468402	1.0873	0.232663	192.4	55.5071	0.994	0.469536	2.606	1.03409	92.938	60.2983	2.35e-07	4.57e-07	49.2159	92.9892	1313.12	1514.55	545.374	639.821	92.76	75.7382	4.4332	5.15774	1016.46	363.205
608	TbCoO3	-2.65826	1.4024	8.33022	62	211.983	5.18608	5.49248	7.44205	90	89.9989	90	20	23.2	22.1576	13.6	3.00666	3.6	2.33238	53.1713	55.4299	15.61	4.53271	0.98	0.482286	1.10597	0.200333	195.4	57.5555	0.982	0.463828	2.66	0.986631	97.3602	57.1094	2.42e-07	4.55e-07	22.2159	39.1235	1394.72	1600.57	712.28	806.444	92.76	75.7382	5.5332	6.72527	1053.04	324.277
609	TbCrO3	-3.21887	2.4854	7.51	62	228.999	5.30962	5.62956	7.66118	90	90	90	20	22.6	22.0871	13	4	3.6	2.33238	51.7839	55.3551	15.722	4.31197	0.99	0.490306	1.1403	0.147188	196.4	58.3596	1.006	0.476386	2.616	1.02461	97.4456	57.0596	2.55e-07	4.5e-07	21.0159	36.7387	1343.52	1545.14	794.68	922.764	92.76	75.7382	6.3932	8.15687	1031.54	345.815
610	TbErO3	-3.94911	4.5065	8.7678	62	283.467	5.68178	5.93756	8.40251	90	90	90	20	31.4	28.6747	14.6	1.95959	4.4	2.93939	74.8365	72.1086	17.968	0.790605	1.06	0.563383	1.1583	0.125497	203.2	65.2055	1.1	0.563525	2.532	1.11295	84.5856	69.0639	4.02e-07	5.01e-07	5.21595	6.4803	1382.92	1587.39	719.08	815.411	92.76	75.7382	6.2732	7.95025	1018.82	360.372
611	TbFeO3	-2.95921	1.6853	7.4405	62	234.574	5.35451	5.6656	7.7324	90	90	90	20	23	22.1269	13.4	3.32265	3.6	2.33238	52.5537	55.3794	15.694	4.36712	0.99	0.490306	1.1228	0.172916	196.2	58.1942	0.994	0.469536	2.65	0.994706	87.4994	65.657	2.5e-07	4.52e-07	18.2159	31.183	1381.52	1585.84	720.88	817.806	92.76	75.7382	5.0532	5.99256	1053.46	323.899
612	TbGaO3	-3.14155	3.6356	8.04532	62	228.397	5.321	5.60395	7.65956	90	90	90	20	24	22.3517	14.4	2.05913	3.6	2.33238	55.3293	55.8209	16.636	2.53205	0.97	0.474974	1.1043	0.20315	193.8	56.3929	0.992	0.468504	2.646	0.99803	92.8836	60.3445	2.58e-07	4.49e-07	8.01595	11.3201	1250.12	1457.19	419.262	612.454	92.76	75.7382	3.4112	4.23921	1016.72	362.891
613	TbGdO3	-3.85624	3.0933	8.16325	62	296.315	6.03344	8.49044	5.78441	90	90	90	20	30.6	27.681	13.8	2.71293	4.4	2.93939	72.8347	69.6108	18.256	1.11365	1.07	0.575847	1.1673	0.117321	203.2	65.2055	1.11	0.575639	2.524	1.12231	84.5856	69.0639	4.92e-07	6.05e-07	4.41595	5.37586	1459.32	1676.83	675.68	760.547	92.76	75.7382	4.2932	4.99259	1019.64	359.397
615	TbHoO3	-3.93132	4.4709	8.64279	62	285.777	5.69193	5.95207	8.43528	90	90	90	20	31.2	28.4211	14.4	2.05913	4.4	2.93939	74.3708	71.5153	18.024	0.832288	1.06	0.563383	1.1605	0.123306	204	66.1483	1.104	0.568317	2.53	1.11528	84.5856	69.0639	3.93e-07	4.93e-07	5.41595	6.78734	1353.32	1555.38	705.48	797.608	92.76	75.7382	5.6932	6.98177	1017.16	362.36
615	TbInO3	-2.95666	2.5935	7.93228	62	269.413	5.56707	5.89847	8.20451	90.0001	90.0002	89.9996	20	27.6	24.5324	14.4	2.05913	3.8	2.4	64.3483	60.8356	17.428	1.12254	1.02	0.518266	1.1403	0.147188	196	58.031	1.03	0.493315	2.64	1.00312	90.3656	62.6549	2.46e-07	4.53e-07	18.6159	31.9757	1223.72	1435.76	444.63	609.73	92.76	75.7382	2.9452	4.09986	1012.62	367.897
616	TbLuO3	-4.00399	4.6811	9.28602	62	273.161	5.61602	5.88404	8.26637	90	90	90	20	32	29.4551	15.2	2.13542	4.4	2.93939	76.3781	74.1223	17.832	0.751808	1.06	0.563383	1.1525	0.131804	200	61.7058	1.094	0.556475	2.538	1.10603	91.1476	61.9028	3.46e-07	4.61e-07	5.41595	6.78734	1489.72	1714.92	743.68	848.879	92.76	75.7382	6.6932	8.68094	1005.66	376.651
617	TbMnO3	-3.04653	0.5087	7.36251	62	236.241	5.3492	5.87388	7.51867	90	90	90	20	22.8	22.1034	13.2	3.65513	3.6	2.33238	52.3723	55.3698	15.746	4.26471	0.99	0.490306	1.08197	0.242165	196.4	58.3596	1.004	0.475167	2.594	1.04586	84.5856	69.0639	5.18e-07	6.41e-07	3.77595	4.7022	1221.52	1434.04	662.48	745.065	92.76	75.7382	4.9332	5.81972	1044.42	332.412
618	TbRhO3	-2.59228	0.8724	8.68324	62	237	5.2913	5.83296	7.67888	90	90	90	20	26.8	23.878	13.6	3.00666	3.8	2.4	61.9658	59.0185	15.932	3.89908	0.98	0.482286	1.1013	0.208259	196.2	58.1942	1.014	0.481564	2.74	0.935008	106.526	54.6229	2.39e-07	4.56e-07	32.2159	59.0452	1548.32	1791.87	806.08	939.999	92.76	75.7382	6.6332	8.57533	1044.9	331.941
619	TbScO3	-3.97456	4.436	6.63	62	252.341	5.47334	5.7633	7.99953	90	90	90	20	22	22.0817	12.4	5.08331	3.6	2.33238	50.3759	55.4213	17.276	1.36367	1.03	0.528772	1.1293	0.162957	199	60.7091	1.064	0.523931	2.556	1.08579	88.2056	64.8832	3.4e-07	4.58e-07	5.41595	6.78734	1375.32	1579.02	721.48	818.606	92.76	75.7382	5.4932	6.66201	1027.56	350.236
620	TbSmO3	-3.85785	4.4562	7.87293	62	301.429	6.07813	8.50777	5.82908	90	90	90	20	30.2	27.2059	13.4	3.32265	4.4	2.93939	71.4567	67.975	18.272	1.13748	1.08	0.588727	1.1981	0.108963	204.8	67.116	1.116	0.583116	2.518	1.12943	84.5856	69.0639	4.18e-07	5.16e-07	4.81595	5.89975	1169.92	1397.26	627.68	707.356	92.76	75.7382	4.0132	4.69508	1009.86	371.33
621	TbTmO3	-3.9751	4.5689	8.93562	62	279.388	5.6555	5.92657	8.33553	90	90	90	20	31.6	28.9316	14.8	1.93907	4.4	2.93939	75.1716	72.5399	18.096	0.903628	1.06	0.563383	1.1713	0.11441	203.4	65.4388	1.1	0.563525	2.534	1.11063	104.442	54.6607	3.65e-07	4.72e-07	5.61595	7.10363	1199.32	1417.41	722.28	819.675	92.76	75.7382	5.6532	6.91715	1020.3	358.616
622	TbVO3	-3.29933	1.5225	7.26233	62	235.844	5.35105	5.75067	7.66421	90.0001	90	90	20	22.4	22.078	12.8	4.35431	3.6	2.33238	51.573	55.3559	15.94	3.88338	0.98	0.482286	1.1078	0.197253	195.8	57.8702	1.034	0.496532	2.61	1.03026	94.7056	58.8851	2.7e-07	4.47e-07	8.41595	12.0653	1490.72	1716.19	795.28	923.665	92.76	75.7382	6.8532	8.96433	1031.14	346.254
623	TiCdO3	-0.684984	0.0439	5.03545	221	68.6832	4.09528	4.09528	4.09528	90	90	90	5	18.8	15.5743	12.8	4.66476	3	1.26491	41.6552	37.469	15.144	2.81477	0.95	0.431277	1.14433	0.160463	189	47.7745	0.96	0.392734	2.71	0.895321	86.1056	67.2452	9.4e-08	1.55e-07	23.8159	37.5686	974.12	1344.25	539.924	731.026	92.76	75.7382	5.1332	7.18024	1093.12	277.289
624	TiCdO3	-2.65769	2.4319	6.01331	33	230.057	5.35976	5.49432	7.81225	90	90	90	20	18.8	15.5743	12.8	4.66476	3	1.26491	41.6552	37.469	15.144	2.81477	0.95	0.431277	1.14433	0.160463	189	47.7745	0.96	0.392734	2.71	0.895321	86.1056	67.2452	9.4e-08	1.55e-07	23.8159	37.5686	974.12	1344.25	539.924	731.026	92.76	75.7382	5.1332	7.18024	1093.12	277.289
625	TiCdO3	-2.65416	2.1261	6.08393	62	227.387	5.36968	5.48664	7.7181	90	90	90	20	18.8	15.5743	12.8	4.66476	3	1.26491	41.6552	37.469	15.144	2.81477	0.95	0.431277	1.14433	0.160463	189	47.7745	0.96	0.392734	2.71	0.895321	86.1056	67.2452	9.4e-08	1.55e-07	23.8159	37.5686	974.12	1344.25	539.924	731.026	92.76	75.7382	5.1332	7.18024	1093.12	277.289
626	TiCdO3	-2.65683	2.4627	6.02935	26	229.445	5.40075	5.52301	7.69216	90	90	90	20	18.8	15.5743	12.8	4.66476	3	1.26491	41.6552	37.469	15.144	2.81477	0.95	0.431277	1.14433	0.160463	189	47.7745	0.96	0.392734	2.71	0.895321	86.1056	67.2452	9.4e-08	1.55e-07	23.8159	37.5686	974.12	1344.25	539.924	731.026	92.76	75.7382	5.1332	7.18024	1093.12	277.289
627	TiCdO3	-2.69621	2.9225	5.63365	148	122.78	5.89365	5.89365	5.89365	53.5117	53.5117	53.5117	10	18.8	15.5743	12.8	4.66476	3	1.26491	41.6552	37.469	15.144	2.81477	0.95	0.431277	1.14433	0.160463	189	47.7745	0.96	0.392734	2.71	0.895321	86.1056	67.2452	9.4e-08	1.55e-07	23.8159	37.5686	974.12	1344.25	539.924	731.026	92.76	75.7382	5.1332	7.18024	1093.12	277.289
628	TiCoO3	-2.65925	2.1759	4.8638	148	105.699	5.53302	5.53302	5.53302	54.9496	54.9496	54.9496	10	14.6	8.2365	12.2	4.91528	2.8	0.979796	30.9597	18.6537	13.878	4.44551	0.91	0.38	1.08	0.222024	187.2	45.6	0.916	0.35109	2.748	0.854316	98.8802	54.5413	9.2e-08	1.56e-07	24.4159	38.7384	1406.12	1615.68	774.68	883.365	92.76	75.7382	7.1132	8.47691	1071.64	297.345
629	TiCrO3	-2.78752	0.4273	4.67296	62	210.17	5.11803	5.3932	7.61414	89.9997	90.0023	90.001	20	14	7.37564	11.6	5.42586	2.8	0.979796	29.5723	16.6745	13.99	4.26593	0.92	0.391918	1.11433	0.180578	188.2	46.7863	0.94	0.371806	2.704	0.902211	98.9656	54.4867	1.05e-07	1.55e-07	23.2159	36.4008	1354.92	1561.16	857.08	985.491	92.76	75.7382	7.9732	9.51029	1050.14	321.942
630	TiFeO3	-2.76562	1.4864	4.64316	1	868.101	5.60098	5.63291	44.2112	54.8403	55.3277	54.4048	80	14.4	7.93977	12	5.05964	2.8	0.979796	30.342	17.7463	13.962	4.31044	0.92	0.391918	1.09683	0.199838	188	46.5446	0.928	0.360799	2.738	0.864648	89.0194	63.6717	1e-07	1.55e-07	20.4159	30.9837	1392.92	1601.18	783.28	893.149	92.76	75.7382	6.6332	8.00351	1072.06	296.907
631	TiFeO3	-2.75079	1.5837	4.82672	62	208.772	5.2328	5.29106	7.5404	90	90	90	20	14.4	7.93977	12	5.05964	2.8	0.979796	30.342	17.7463	13.962	4.31044	0.92	0.391918	1.09683	0.199838	188	46.5446	0.928	0.360799	2.738	0.864648	89.0194	63.6717	1e-07	1.55e-07	20.4159	30.9837	1392.92	1601.18	783.28	893.149	92.76	75.7382	6.6332	8.00351	1072.06	296.907
632	TiFeO3	-2.79128	2.0654	4.62264	161	108.994	5.5324	5.5324	5.5324	56.1253	56.1253	56.1253	10	14.4	7.93977	12	5.05964	2.8	0.979796	30.342	17.7463	13.962	4.31044	0.92	0.391918	1.09683	0.199838	188	46.5446	0.928	0.360799	2.738	0.864648	89.0194	63.6717	1e-07	1.55e-07	20.4159	30.9837	1392.92	1601.18	783.28	893.149	92.76	75.7382	6.6332	8.00351	1072.06	296.907
633	TiFeO3	-2.70329	1.6511	4.95843	63	101.613	2.92057	5.01186	7.25684	90	90	106.94	10	14.4	7.93977	12	5.05964	2.8	0.979796	30.342	17.7463	13.962	4.31044	0.92	0.391918	1.09683	0.199838	188	46.5446	0.928	0.360799	2.738	0.864648	89.0194	63.6717	1e-07	1.55e-07	20.4159	30.9837	1392.92	1601.18	783.28	893.149	92.76	75.7382	6.6332	8.00351	1072.06	296.907
634	TiFeO3	-2.81393	2.0331	4.62697	148	108.892	5.56996	5.56996	5.56996	55.3161	55.3161	55.3161	10	14.4	7.93977	12	5.05964	2.8	0.979796	30.342	17.7463	13.962	4.31044	0.92	0.391918	1.09683	0.199838	188	46.5446	0.928	0.360799	2.738	0.864648	89.0194	63.6717	1e-07	1.55e-07	20.4159	30.9837	1392.92	1601.18	783.28	893.149	92.76	75.7382	6.6332	8.00351	1072.06	296.907
635	TiFeO3	-2.81392	2.0201	4.6255	148	108.927	5.17006	5.17006	5.57246	62.3613	62.3613	60	10	14.4	7.93977	12	5.05964	2.8	0.979796	30.342	17.7463	13.962	4.31044	0.92	0.391918	1.09683	0.199838	188	46.5446	0.928	0.360799	2.738	0.864648	89.0194	63.6717	1e-07	1.55e-07	20.4159	30.9837	1392.92	1601.18	783.28	893.149	92.76	75.7382	6.6332	8.00351	1072.06	296.907
636	TiFeO3	-2.79125	2.0256	4.6342	161	108.722	5.52629	5.52637	5.52619	56.1572	56.1579	56.1562	10	14.4	7.93977	12	5.05964	2.8	0.979796	30.342	17.7463	13.962	4.31044	0.92	0.391918	1.09683	0.199838	188	46.5446	0.928	0.360799	2.738	0.864648	89.0194	63.6717	1e-07	1.55e-07	20.4159	30.9837	1392.92	1601.18	783.28	893.149	92.76	75.7382	6.6332	8.00351	1072.06	296.907
637	TiHgO3	-2.26735	1.3446	8.31937	167	118.344	5.57751	5.57751	5.57751	58.4523	58.4523	58.4523	10	25.2	27.9313	12.8	4.66476	3.2	1.6	59.291	71.7195	15.362	2.67923	0.94	0.417612	1.17533	0.161938	188.6	47.2762	0.944	0.375745	2.772	0.830961	86.1056	67.2452	2.72e-07	3.77e-07	6.07595	8.58261	892.096	1350.23	467.944	739.802	442.76	656.357	4.3312	7.22891	1120.98	259.69
638	TiMnO3	-2.96654	2.3341	4.46583	148	112.147	5.19405	5.19405	5.65978	62.6867	62.6867	60	10	14.2	7.65245	11.8	5.23068	2.8	0.979796	30.1606	17.4875	14.014	4.228	0.92	0.391918	1.056	0.257989	188.2	46.7863	0.938	0.369886	2.682	0.928362	86.1056	67.2452	3.68e-07	5.58e-07	5.97595	8.559	1232.92	1452.25	724.88	831.456	92.76	75.7382	6.5132	7.89897	1063.02	306.72
639	TiMnO3	-2.9105	1.5326	4.70035	62	213.103	5.2106	5.4032	7.56921	90	90	90	20	14.2	7.65245	11.8	5.23068	2.8	0.979796	30.1606	17.4875	14.014	4.228	0.92	0.391918	1.056	0.257989	188.2	46.7863	0.938	0.369886	2.682	0.928362	86.1056	67.2452	3.68e-07	5.58e-07	5.97595	8.559	1232.92	1452.25	724.88	831.456	92.76	75.7382	6.5132	7.89897	1063.02	306.72
640	TiMnO3	-2.96669	2.334	4.44854	148	112.583	5.67223	5.67223	5.67223	54.5271	54.5271	54.5271	10	14.2	7.65245	11.8	5.23068	2.8	0.979796	30.1606	17.4875	14.014	4.228	0.92	0.391918	1.056	0.257989	188.2	46.7863	0.938	0.369886	2.682	0.928362	86.1056	67.2452	3.68e-07	5.58e-07	5.97595	8.559	1232.92	1452.25	724.88	831.456	92.76	75.7382	6.5132	7.89897	1063.02	306.72
641	TiMnO3	-2.93315	1.9283	4.4848	161	111.673	5.56461	5.56461	5.56461	56.3915	56.3915	56.3915	10	14.2	7.65245	11.8	5.23068	2.8	0.979796	30.1606	17.4875	14.014	4.228	0.92	0.391918	1.056	0.257989	188.2	46.7863	0.938	0.369886	2.682	0.928362	86.1056	67.2452	3.68e-07	5.58e-07	5.97595	8.559	1232.92	1452.25	724.88	831.456	92.76	75.7382	6.5132	7.89897	1063.02	306.72
642	TiMnO3	-2.93278	1.8848	4.48665	161	111.626	5.24714	5.24714	5.57626	61.934	61.934	60	10	14.2	7.65245	11.8	5.23068	2.8	0.979796	30.1606	17.4875	14.014	4.228	0.92	0.391918	1.056	0.257989	188.2	46.7863	0.938	0.369886	2.682	0.928362	86.1056	67.2452	3.68e-07	5.58e-07	5.97595	8.559	1232.92	1452.25	724.88	831.456	92.76	75.7382	6.5132	7.89897	1063.02	306.72
643	TiNiO3	-2.47431	2.2505	4.95335	1	310.881	5.49685	5.51488	16.4368	55.0006	55.1579	54.6807	30	14.8	8.54166	12.4	4.8	2.8	0.979796	30.9117	18.5819	13.862	4.47149	0.91	0.38	1.07433	0.23012	187.2	45.6	0.914	0.349605	2.754	0.848283	108.413	51.6799	9.44e-08	1.55e-07	22.6159	35.2352	1403.32	1612.58	766.68	874.469	92.76	75.7382	7.3132	8.69785	1066.98	302.327
644	TiNiO3	-2.47736	2.5877	4.93223	161	104.071	5.07518	5.5093	5.07518	117.426	60	117.426	10	14.8	8.54166	12.4	4.8	2.8	0.979796	30.9117	18.5819	13.862	4.47149	0.91	0.38	1.07433	0.23012	187.2	45.6	0.914	0.349605	2.754	0.848283	108.413	51.6799	9.44e-08	1.55e-07	22.6159	35.2352	1403.32	1612.58	766.68	874.469	92.76	75.7382	7.3132	8.69785	1066.98	302.327
645	TiNiO3	-2.47233	1.7082	4.96663	1	516.75	5.49701	5.4893	27.4504	55.0387	54.9077	54.8788	50	14.8	8.54166	12.4	4.8	2.8	0.979796	30.9117	18.5819	13.862	4.47149	0.91	0.38	1.07433	0.23012	187.2	45.6	0.914	0.349605	2.754	0.848283	108.413	51.6799	9.44e-08	1.55e-07	22.6159	35.2352	1403.32	1612.58	766.68	874.469	92.76	75.7382	7.3132	8.69785	1066.98	302.327
646	TiNiO3	-2.49134	2.7984	4.9489	148	103.72	5.49578	5.49578	5.49578	55.0002	55.0002	55.0002	10	14.8	8.54166	12.4	4.8	2.8	0.979796	30.9117	18.5819	13.862	4.47149	0.91	0.38	1.07433	0.23012	187.2	45.6	0.914	0.349605	2.754	0.848283	108.413	51.6799	9.44e-08	1.55e-07	22.6159	35.2352	1403.32	1612.58	766.68	874.469	92.76	75.7382	7.3132	8.69785	1066.98	302.327
647	TiNiO3	-2.49134	2.8865	4.94831	148	103.733	5.49628	5.49628	5.49628	54.9945	54.9946	54.9947	10	14.8	8.54166	12.4	4.8	2.8	0.979796	30.9117	18.5819	13.862	4.47149	0.91	0.38	1.07433	0.23012	187.2	45.6	0.914	0.349605	2.754	0.848283	108.413	51.6799	9.44e-08	1.55e-07	22.6159	35.2352	1403.32	1612.58	766.68	874.469	92.76	75.7382	7.3132	8.69785	1066.98	302.327
648	TiNiO3	-2.47214	2.3459	4.95715	1	414.19	5.50335	10.9984	10.9803	54.9782	54.9335	54.796	40	14.8	8.54166	12.4	4.8	2.8	0.979796	30.9117	18.5819	13.862	4.47149	0.91	0.38	1.07433	0.23012	187.2	45.6	0.914	0.349605	2.754	0.848283	108.413	51.6799	9.44e-08	1.55e-07	22.6159	35.2352	1403.32	1612.58	766.68	874.469	92.76	75.7382	7.3132	8.69785	1066.98	302.327
649	TiPbO3	-2.70515	1.5828	8.0487	221	62.5258	3.96861	3.96743	3.9711	90	90	90	5	25.6	28.7165	13.2	4.66476	3.2	1.6	60.613	74.3254	16.196	2.79978	1	0.505964	1.15083	0.15878	190	49.0551	0.97	0.404277	2.838	0.77847	93.1298	59.2421	1.22e-07	1.61e-07	11.4159	14.5422	1170.52	1409.67	541.202	731.126	92.76	75.7382	4.8272	7.15656	1062.68	307.104
650	TiPbO3	-2.74531	1.8357	7.29511	99	68.9848	3.86121	3.86121	4.62706	90	90	90	5	25.6	28.7165	13.2	4.66476	3.2	1.6	60.613	74.3254	16.196	2.79978	1	0.505964	1.15083	0.15878	190	49.0551	0.97	0.404277	2.838	0.77847	93.1298	59.2421	1.22e-07	1.61e-07	11.4159	14.5422	1170.52	1409.67	541.202	731.126	92.76	75.7382	4.8272	7.15656	1062.68	307.104
651	TiSnO3	-2.77076	1.1151	4.57223	148	155.858	7.42635	7.42635	7.42635	40.5085	40.5085	40.5085	10	19.2	16.3267	13.2	4.66476	3	1.26491	42.915	39.8566	15.802	2.61406	0.93	0.404475	1.09233	0.205463	187.6	46.0678	0.96	0.392734	2.764	0.838513	107.565	51.6565	1.03e-07	1.55e-07	17.8159	26.0229	1341.12	1547.3	522.096	730.572	92.76	75.7382	5.2732	7.20839	1061.28	308.695
652	TiSnO3	-2.61306	1.0479	5.77825	221	61.6641	3.95073	3.95073	3.95073	90	90	90	5	19.2	16.3267	13.2	4.66476	3	1.26491	42.915	39.8566	15.802	2.61406	0.93	0.404475	1.09233	0.205463	187.6	46.0678	0.96	0.392734	2.764	0.838513	107.565	51.6565	1.03e-07	1.55e-07	17.8159	26.0229	1341.12	1547.3	522.096	730.572	92.76	75.7382	5.2732	7.20839	1061.28	308.695
653	TiVO3	-2.97199	0.6253	4.41652	148	110.394	5.62146	5.62146	5.62146	54.7971	54.7971	54.7971	10	13.8	7.11056	11.4	5.64269	2.8	0.979796	29.3613	16.3938	14.208	3.92949	0.91	0.38	1.08183	0.219466	187.6	46.0678	0.968	0.401915	2.698	0.909206	96.2256	56.4694	1.2e-07	1.6e-07	10.6159	13.2779	1502.12	1729.66	857.68	986.297	92.76	75.7382	8.4332	10.1399	1049.74	322.436
654	TiZnO3	-2.73029	2.4888	5.20505	62	205.802	5.14579	5.28355	7.56957	90	90	90	20	15.2	9.17388	12.8	4.66476	2.8	0.979796	32.2548	20.6672	14.376	3.68448	0.91	0.38	1.10233	0.193309	187	45.3696	0.92	0.354175	2.702	0.904531	86.1056	67.2452	9.2e-08	1.56e-07	28.4159	46.5761	1002.12	1346.79	559.616	733.546	92.76	75.7382	5.3432	7.2265	1100.84	271.382
655	TiZnO3	-2.7787	2.8321	5.02989	161	106.484	5.14191	5.14191	5.51732	62.2264	62.2264	60	10	15.2	9.17388	12.8	4.66476	2.8	0.979796	32.2548	20.6672	14.376	3.68448	0.91	0.38	1.10233	0.193309	187	45.3696	0.92	0.354175	2.702	0.904531	86.1056	67.2452	9.2e-08	1.56e-07	28.4159	46.5761	1002.12	1346.79	559.616	733.546	92.76	75.7382	5.3432	7.2265	1100.84	271.382
656	TiZnO3	-2.8056	3.0906	5.00741	148	106.962	5.55059	5.55059	5.55059	55.0378	55.0378	55.0378	10	15.2	9.17388	12.8	4.66476	2.8	0.979796	32.2548	20.6672	14.376	3.68448	0.91	0.38	1.10233	0.193309	187	45.3696	0.92	0.354175	2.702	0.904531	86.1056	67.2452	9.2e-08	1.56e-07	28.4159	46.5761	1002.12	1346.79	559.616	733.546	92.76	75.7382	5.3432	7.2265	1100.84	271.382
658	TlBrO3	-0.655096	3.6425	5.62924	160	98.0192	4.63004	4.63004	4.63004	84.6165	84.6165	84.6165	5	28	28.4886	15.6	1.35647	3.2	1.6	66.4571	73.2699	17.816	0.983496	0.97	0.511468	1.199	0.160722	179.2	42.7383	0.906	0.336785	2.98	0.704954	156.768	93.1548	2e+17	4e+17	9.23995	18.3801	469.72	644.975	201.44	204.791	209.96	197.324	2.1332	2.39479	1133.66	280.266
658	TlFeO3	-1.43864	0.7229	8.56708	62	238.972	5.41455	5.55345	7.94734	90	90	90	20	26.2	28.273	13.8	3.1241	3.2	1.6	61.6453	73.0184	15.278	4.09436	1.02	0.538145	1.193	0.17255	190.8	50.2251	0.92	0.348712	2.754	0.842795	94.7744	57.0038	5e-08	6.32e-08	25.2159	32.6704	1030.12	1232	510.48	680.986	92.76	75.7382	3.7332	5.26391	1058.18	316.854
659	TlGaO3	-1.63074	0.2334	9.2324	62	231.735	5.35239	5.4983	7.87435	90	90	90	20	27.2	28.3365	14.8	1.46969	3.2	1.6	64.4209	73.0089	16.22	2.21067	1	0.525357	1.1745	0.209143	188.4	47.8565	0.918	0.346895	2.75	0.847207	100.159	50.0171	5.8e-08	7.11e-08	15.0159	19.1291	898.72	1016.85	208.862	207.642	92.76	75.7382	2.0912	2.33111	1021.44	357.102
660	TlIO3	-0.983229	2.7633	6.53371	160	96.3953	4.5864	4.5864	4.5864	88.6427	88.6427	88.6427	5	31.6	30.2298	15.6	1.35647	3.4	1.74356	75.8572	77.2964	19.004	3.35844	1.02	0.538145	1.27717	0.0281445	182.8	43.9017	0.944	0.373181	2.92	0.716771	150.891	82.7286	200000000000000	400000000000000	9.30575	18.3479	494.8	641.561	225.65	217.716	256.56	287.524	2.5252	3.03718	1107.36	284.584
661	TlSbO3	-1.72861	2.4341	6.33143	148	196.252	8.34892	8.34892	8.34892	37.8093	37.8093	37.8093	10	31.2	29.956	15.2	1.16619	3.4	1.74356	74.8283	76.6415	17.498	0.350223	1.03	0.545527	1.1885	0.181436	191.4	50.8708	0.952	0.38233	2.798	0.797957	112.045	40.8916	1.1e-07	1.56e-07	14.0159	18.492	775.32	839.871	329.036	351.407	92.76	75.7382	4.9132	7.55222	1072.48	304.562
662	TlSbO3	-1.59413	2.1507	6.05133	182	410.671	5.40304	5.40304	16.2438	90	90	120	20	31.2	29.956	15.2	1.16619	3.4	1.74356	74.8283	76.6415	17.498	0.350223	1.03	0.545527	1.1885	0.181436	191.4	50.8708	0.952	0.38233	2.798	0.797957	112.045	40.8916	1.1e-07	1.56e-07	14.0159	18.492	775.32	839.871	329.036	351.407	92.76	75.7382	4.9132	7.55222	1072.48	304.562
663	TlSbO3	-1.7284	2.4363	6.50826	163	381.839	5.41373	5.41373	15.0438	90	90	120	20	31.2	29.956	15.2	1.16619	3.4	1.74356	74.8283	76.6415	17.498	0.350223	1.03	0.545527	1.1885	0.181436	191.4	50.8708	0.952	0.38233	2.798	0.797957	112.045	40.8916	1.1e-07	1.56e-07	14.0159	18.492	775.32	839.871	329.036	351.407	92.76	75.7382	4.9132	7.55222	1072.48	304.562
664	TmAlO3	-3.79262	5.7744	7.90937	62	204.835	5.15524	5.37671	7.3899	90	90	90	20	21.2	23.9783	15.2	1.16619	3.4	2.33238	48.7828	60.2261	16.236	3.18999	0.96	0.468402	1.11	0.226694	191	53.1413	0.986	0.455702	2.636	0.991254	112.795	39.0148	1.41e-07	2.68e-07	50.4159	92.5258	1057.12	1197.82	583.174	704.988	92.76	75.7382	5.6332	6.90236	1022.64	355.669
665	TmBO3	-3.21711	2.3564	7.00139	193	324.087	6.56371	6.56371	8.68624	90	90	120	30	19.6	24.7273	15.2	1.16619	3.2	2.4	45.5487	61.7255	15.114	5.40418	0.88	0.445646	1.057	0.329751	184.4	50.492	0.906	0.43889	2.722	0.914164	109.84	44.4614	200000000000	400000000000	8.81595	11.2196	1338.72	1651.99	866.28	1007.94	92.76	75.7382	13.4932	19.3497	1067.26	307.798
666	TmBiO3	-2.82729	2.4418	9.17408	148	154.183	5.94949	6.09075	5.9495	119.236	60	119.236	10	35.2	33.606	15.6	0.489898	4	2.52982	85.1826	85.6728	18.498	1.55916	1.03	0.528772	1.182	0.0973961	202	63.6867	1.038	0.49487	2.718	0.917178	122.627	22.6278	3.95e-07	5.23e-07	5.01595	6.74097	866.12	958.111	505.36	683.163	92.76	75.7382	5.6732	6.93213	1047.74	326.61
667	TmBiO3	-2.85088	3.1128	9.10093	161	155.422	5.96713	6.10517	5.96713	119.255	60	119.255	10	35.2	33.606	15.6	0.489898	4	2.52982	85.1826	85.6728	18.498	1.55916	1.03	0.528772	1.182	0.0973961	202	63.6867	1.038	0.49487	2.718	0.917178	122.627	22.6278	3.95e-07	5.23e-07	5.01595	6.74097	866.12	958.111	505.36	683.163	92.76	75.7382	5.6732	6.93213	1047.74	326.61
668	TmCoO3	-2.69475	0.0714	8.48988	62	215.827	5.13606	5.70877	7.36092	90	90	90	20	24	23.6728	14.4	2.72764	3.6	2.33238	55.1731	59.2612	15.57	4.50074	0.98	0.482286	1.12867	0.191164	194	55.3534	0.974	0.449604	2.69	0.939915	117.217	31.1791	1.47e-07	2.65e-07	23.4159	38.8522	1138.72	1320.81	750.08	851.687	92.76	75.7382	6.7332	7.97682	1059.22	315.097
669	TmCrO3	-3.25068	2.5329	8.05838	62	221.666	5.23632	5.5826	7.58289	90	90	90	20	23.4	23.6271	13.8	3.91918	3.6	2.33238	53.7857	59.2382	15.682	4.27939	0.99	0.490306	1.163	0.128515	195	56.2139	0.998	0.462964	2.646	0.981052	117.302	31.0331	1.61e-07	2.62e-07	22.2159	36.4891	1087.52	1242.56	832.48	959.314	92.76	75.7382	7.5932	9.10334	1037.72	337.616
670	TmFeO3	-2.98798	1.7122	7.97731	62	227.123	5.27579	5.60774	7.67689	90	90	90	20	23.8	23.6508	14.2	3.1241	3.6	2.33238	54.5555	59.2349	15.654	4.3347	0.99	0.490306	1.1455	0.159831	194.8	56.0371	0.986	0.455702	2.68	0.948704	107.356	49.1233	1.55e-07	2.63e-07	19.4159	30.9971	1125.52	1300.32	758.68	862.076	92.76	75.7382	6.2532	7.44735	1059.64	314.7
671	TmGaO3	-3.17394	3.6067	8.58139	62	221.877	5.24091	5.57066	7.59973	90	90	90	20	24.8	23.8277	15.2	1.16619	3.6	2.33238	57.3311	59.5546	16.596	2.49089	0.97	0.474974	1.127	0.194309	192.4	54.1021	0.984	0.454603	2.676	0.952315	112.74	39.1139	1.63e-07	2.62e-07	9.21595	11.8772	994.12	1109.98	457.062	687.22	92.76	75.7382	4.6112	6.43926	1022.9	355.344
672	TmMnO3	-3.07201	0.4206	7.90781	62	228.357	5.27079	5.81242	7.45387	90	90	90	20	23.6	23.6356	14	3.52136	3.6	2.33238	54.3741	59.2321	15.706	4.232	0.99	0.490306	1.10467	0.236947	195	56.2139	0.996	0.461675	2.624	1.00388	104.442	54.6607	4.23e-07	5.72e-07	4.97595	6.72372	965.52	1072.62	700.28	796.183	92.76	75.7382	6.1332	7.32867	1050.6	323.628
673	TmNiO3	-2.4364	0.0742	8.5845	62	213.262	5.1455	5.64218	7.34581	90	89.8936	90	20	24.2	23.7015	14.6	2.33238	3.6	2.33238	55.1252	59.2583	15.554	4.53238	0.98	0.482286	1.123	0.201881	194	55.3534	0.972	0.448705	2.696	0.934807	126.75	17.8494	1.5e-07	2.65e-07	21.6159	35.3094	1135.92	1316.45	742.08	842.224	92.76	75.7382	6.9332	8.22048	1054.56	319.622
674	TmVO3	-3.32674	1.6209	7.79775	14	228.176	5.26283	5.68801	7.6224	90	90.1239	90	20	23.2	23.6254	13.6	4.31741	3.6	2.33238	53.5748	59.246	15.9	3.84945	0.98	0.482286	1.1305	0.187713	194.4	55.6906	1.026	0.484132	2.64	0.987137	114.562	35.8265	1.75e-07	2.62e-07	9.61595	12.5513	1234.72	1475.52	833.08	960.157	92.76	75.7382	8.0532	9.77709	1037.32	338.072
675	UTlO3	-2.94533	0.3084	9.84084	221	82.7517	4.35772	4.35772	4.35772	90	90	90	5	39.4	38.614	13.4	3.87814	4.2	2.85657	98.0821	101.092	16.358	1.93476	1.09	0.601997	1.22075	0.118136	203	66.453	1.038	0.502808	2.664	0.953428	91.8606	61.2438	8.6e-08	1.13e-07	14.6159	18.8514	1243.32	1611.44	429.34	528.231	92.76	75.7382	3.7732	5.34046	1025.2	352.491
676	VBO3	-2.73076	1.8194	3.87587	167	94.041	5.63582	5.63582	5.63582	49.1386	49.1386	49.1386	10	10.4	6.40625	13.2	4.26146	2.4	0.8	21.9501	14.6343	12.958	5.53271	0.8	0.291548	0.9935	0.346466	176.8	36.433	0.84	0.309839	2.798	0.796904	100.103	50.6123	200000000000	400000000000	11.6159	14.2503	1630.12	1893.16	939.28	1084.53	92.76	75.7382	14.6932	19.7004	1078.1	291.561
677	VBiO3	-2.08122	1.2434	8.21091	14	249.09	5.48767	5.76989	7.86692	90	90.2594	90	20	26	29.0861	13.6	4.31741	3.2	1.6	61.584	74.9304	16.342	4.29284	0.95	0.43589	1.1185	0.191478	194.4	55.6906	0.972	0.407058	2.794	0.80074	112.89	36.6852	3e-07	5.06e-07	7.81595	11.9963	1157.52	1431.23	578.36	824.423	92.76	75.7382	6.8732	8.97322	1058.58	312.035
678	VCdO3	-2.03243	0.8123	6.25349	62	224.487	5.35153	5.38795	7.78554	90	90	90	20	19	15.6205	13	4.28952	3	1.26491	42.2701	37.5909	14.68	3.60053	0.94	0.421189	1.1295	0.187912	188.2	46.8376	0.952	0.38233	2.728	0.872225	94.7056	58.8851	5.4e-08	7.79e-08	25.6159	37.654	998.12	1390.48	588.324	824.254	92.76	75.7382	5.9532	8.74614	1091.54	279.77
679	VCrO3	-2.43114	1.2588	4.77789	1	209.829	5.09724	5.49962	9.09344	85.2204	73.6602	117.6	20	14.2	7.6	11.8	5.15364	2.8	0.979796	30.1872	17.3796	13.526	4.70831	0.91	0.38	1.0995	0.203177	187.4	45.8153	0.932	0.360355	2.722	0.879418	107.566	41.1479	6.54e-08	8.34e-08	25.0159	36.5185	1378.92	1595.42	905.48	1041.87	92.76	75.7382	8.7932	10.5227	1048.56	323.872
680	VCrO3	-2.43424	1.6264	4.78231	1	209.635	5.10626	5.4969	9.07877	85.221	73.6722	117.661	20	14.2	7.6	11.8	5.15364	2.8	0.979796	30.1872	17.3796	13.526	4.70831	0.91	0.38	1.0995	0.203177	187.4	45.8153	0.932	0.360355	2.722	0.879418	107.566	41.1479	6.54e-08	8.34e-08	25.0159	36.5185	1378.92	1595.42	905.48	1041.87	92.76	75.7382	8.7932	10.5227	1048.56	323.872
681	VCrO3	-2.4321	1.423	4.76893	1	210.223	5.13286	5.49307	9.07917	85.3006	73.5476	117.768	20	14.2	7.6	11.8	5.15364	2.8	0.979796	30.1872	17.3796	13.526	4.70831	0.91	0.38	1.0995	0.203177	187.4	45.8153	0.932	0.360355	2.722	0.879418	107.566	41.1479	6.54e-08	8.34e-08	25.0159	36.5185	1378.92	1595.42	905.48	1041.87	92.76	75.7382	8.7932	10.5227	1048.56	323.872
682	VCrO3	-2.43221	1.2464	4.78008	1	209.733	5.50336	5.10523	7.50375	90.0612	95.8346	90.0442	20	14.2	7.6	11.8	5.15364	2.8	0.979796	30.1872	17.3796	13.526	4.70831	0.91	0.38	1.0995	0.203177	187.4	45.8153	0.932	0.360355	2.722	0.879418	107.566	41.1479	6.54e-08	8.34e-08	25.0159	36.5185	1378.92	1595.42	905.48	1041.87	92.76	75.7382	8.7932	10.5227	1048.56	323.872
683	VCrO3	-2.43053	1.3705	4.77134	1	210.117	5.12699	5.50421	9.07179	85.1691	73.6446	117.823	20	14.2	7.6	11.8	5.15364	2.8	0.979796	30.1872	17.3796	13.526	4.70831	0.91	0.38	1.0995	0.203177	187.4	45.8153	0.932	0.360355	2.722	0.879418	107.566	41.1479	6.54e-08	8.34e-08	25.0159	36.5185	1378.92	1595.42	905.48	1041.87	92.76	75.7382	8.7932	10.5227	1048.56	323.872
684	VCrO3	-2.43215	1.2605	4.77323	1	210.034	5.4968	5.1165	7.50624	89.9501	95.7836	90.0147	20	14.2	7.6	11.8	5.15364	2.8	0.979796	30.1872	17.3796	13.526	4.70831	0.91	0.38	1.0995	0.203177	187.4	45.8153	0.932	0.360355	2.722	0.879418	107.566	41.1479	6.54e-08	8.34e-08	25.0159	36.5185	1378.92	1595.42	905.48	1041.87	92.76	75.7382	8.7932	10.5227	1048.56	323.872
685	VCrO3	-2.4326	1.3463	4.7573	1	210.737	5.10928	5.50969	9.10312	85.1956	73.5379	117.584	20	14.2	7.6	11.8	5.15364	2.8	0.979796	30.1872	17.3796	13.526	4.70831	0.91	0.38	1.0995	0.203177	187.4	45.8153	0.932	0.360355	2.722	0.879418	107.566	41.1479	6.54e-08	8.34e-08	25.0159	36.5185	1378.92	1595.42	905.48	1041.87	92.76	75.7382	8.7932	10.5227	1048.56	323.872
686	VCrO3	-2.43234	1.3713	4.77532	1	209.942	5.1181	5.50588	9.06972	85.1058	73.7114	117.765	20	14.2	7.6	11.8	5.15364	2.8	0.979796	30.1872	17.3796	13.526	4.70831	0.91	0.38	1.0995	0.203177	187.4	45.8153	0.932	0.360355	2.722	0.879418	107.566	41.1479	6.54e-08	8.34e-08	25.0159	36.5185	1378.92	1595.42	905.48	1041.87	92.76	75.7382	8.7932	10.5227	1048.56	323.872
687	VCuO3	-1.80873	0.6944	5.24241	148	102.935	5.56175	5.56175	5.56175	53.4263	53.4263	53.4263	10	15.2	9.01998	12.8	4.35431	2.8	0.979796	32.4971	20.5949	13.502	4.74053	0.9	0.367423	1.0755	0.226365	186	44.109	0.916	0.345114	2.77	0.825009	118.537	35.0039	4.34e-08	7.86e-08	86.2159	157.35	1430.12	1648.07	741.034	880.043	92.76	75.7382	7.3132	9.21068	1067.08	302.671
688	VGaO3	-2.31238	1.4157	5.38117	62	208.186	5.13569	7.87867	5.14517	89.9994	89.9997	90.0018	20	15.6	9.64572	13.2	4.26146	2.8	0.979796	33.7325	22.516	14.44	3.74174	0.89	0.355528	1.0635	0.240726	184.8	42.7383	0.918	0.346895	2.752	0.844545	103.004	46.5956	6.8e-08	8.54e-08	12.0159	14.6975	1285.52	1512.58	530.062	832.037	92.76	75.7382	5.8112	8.74512	1033.74	342.781
689	VGeO3	-2.14806	0.0124	4.74642	15	240.109	6.77155	6.77155	5.33858	82.3076	97.6924	93.838	20	15.8	9.96795	13.4	4.27083	2.8	0.979796	34.3159	23.459	14.806	3.55021	0.88	0.344384	1.0655	0.238225	184.2	42.0875	0.912	0.341667	2.792	0.802681	118.493	35.0032	0.00010004	0.00019998	18.2159	24.0911	1408.72	1625.48	711.76	861.275	92.76	75.7382	11.0532	13.5673	1070.38	299.217
690	VHO3	-2.00347	2.086	2.97063	4	335.216	5.04569	8.69705	7.87184	90	103.972	90	30	9.6	7.22772	10.8	6.49307	2.2	0.979796	19.9895	16.5293	14.364	3.79803	0.68	0.361386	0.9115	0.492574	162.4	41.4613	0.736	0.373181	2.83	0.768531	109.259	39.4723	4e-08	8e-08	6.25205	12.3741	794.176	1443.17	472.282	855.505	99.36	68.455	4.8048	8.99854	1180.38	264.74
691	VHO3	-1.97938	2.1038	2.7765	4	358.653	5.11585	8.57039	8.29088	90	99.3784	90	30	9.6	7.22772	10.8	6.49307	2.2	0.979796	19.9895	16.5293	14.364	3.79803	0.68	0.361386	0.9115	0.492574	162.4	41.4613	0.736	0.373181	2.83	0.768531	109.259	39.4723	4e-08	8e-08	6.25205	12.3741	794.176	1443.17	472.282	855.505	99.36	68.455	4.8048	8.99854	1180.38	264.74
692	VHO3	-1.95826	0.6363	2.54522	1	260.829	6.17562	6.2176	12.141	93.5257	86.4668	145.899	20	9.6	7.22772	10.8	6.49307	2.2	0.979796	19.9895	16.5293	14.364	3.79803	0.68	0.361386	0.9115	0.492574	162.4	41.4613	0.736	0.373181	2.83	0.768531	109.259	39.4723	4e-08	8e-08	6.25205	12.3741	794.176	1443.17	472.282	855.505	99.36	68.455	4.8048	8.99854	1180.38	264.74
693	VHO3	-1.97932	2.1077	2.74389	1	362.916	5.18999	8.62759	8.1853	90.3469	97.7703	87.9492	30	9.6	7.22772	10.8	6.49307	2.2	0.979796	19.9895	16.5293	14.364	3.79803	0.68	0.361386	0.9115	0.492574	162.4	41.4613	0.736	0.373181	2.83	0.768531	109.259	39.4723	4e-08	8e-08	6.25205	12.3741	794.176	1443.17	472.282	855.505	99.36	68.455	4.8048	8.99854	1180.38	264.74
694	VPbO3	-2.11902	1.3521	6.96795	99	72.9565	3.83517	3.83517	4.96014	90	90	90	5	25.8	28.6943	13.4	4.27083	3.2	1.6	61.2279	74.2301	15.732	3.72236	0.99	0.498397	1.136	0.186993	189.2	48.1597	0.962	0.394381	2.856	0.748722	101.73	48.3152	8.2e-08	1e-07	13.2159	16.2031	1194.52	1450.58	589.602	824.267	92.76	75.7382	5.6472	8.75541	1061.1	309.191
	VPbO3	-2.11902	1.4517	7.08966	99	71.704	3.84266	3.84266	4.85601	90	90	90	5	25.8	28.6943	13.4	4.27083	3.2	1.6	61.2279	74.2301	15.732	3.72236	0.99	0.498397	1.136	0.186993	189.2	48.1597	0.962	0.394381	2.856	0.748722	101.73	48.3152	8.2e-08	1e-07	13.2159	16.2031	1194.52	1450.58	589.602	824.267	92.76	75.7382	5.6472	8.75541	1061.1	309.191
695	VSiO3	-2.79112	1.4653	3.8007	15	221.991	6.64928	6.64928	5.12086	82.0816	97.9184	92.9339	20	12.2	5.87878	13.4	4.27083	2.6	0.8	25.405	13.5992	14.492	3.70633	0.85	0.316228	1.0195	0.303975	182.2	40.1019	0.9	0.332265	2.77	0.825009	121.319	35.492	0.00020004	0.00039998	36.2159	58.143	1424.72	1642.29	806.88	934.365	92.76	75.7382	14.7332	19.7722	1075.28	294.287
696	VZnO3	-2.12973	1.0941	5.38021	62	202.897	5.15386	5.15051	7.64351	90.0029	90.0012	89.992	20	15.4	9.32952	13	4.28952	2.8	0.979796	32.8697	21.1623	13.912	4.23127	0.9	0.367423	1.0875	0.21374	186.2	44.3459	0.912	0.341667	2.72	0.881839	94.7056	58.8851	5.2e-08	7.76e-08	30.2159	46.4672	1026.12	1392.45	608.016	825.335	92.76	75.7382	6.1632	8.76453	1099.26	273.962
697	YAlO3	-3.73777	5.5402	5.18711	62	209.857	5.22652	5.38721	7.4533	90	90	90	20	15.2	12.0565	12.8	5.03587	2.8	1.16619	32.7771	28.3849	16.392	3.3417	0.97	0.485386	1.099	0.228482	190	51.4782	0.984	0.452265	2.63	0.99968	98.8622	51.7214	1.25e-07	2.38e-07	50.4159	92.5258	1334.32	1545.48	579.374	698.342	92.76	75.7382	4.5532	5.30923	1023.3	354.88
698	YAlO3	-3.71079	4.9586	5.22999	167	104.068	5.24649	5.2465	5.24649	60.8481	60.8481	60.8481	10	15.2	12.0565	12.8	5.03587	2.8	1.16619	32.7771	28.3849	16.392	3.3417	0.97	0.485386	1.099	0.228482	190	51.4782	0.984	0.452265	2.63	0.99968	98.8622	51.7214	1.25e-07	2.38e-07	50.4159	92.5258	1334.32	1545.48	579.374	698.342	92.76	75.7382	4.5532	5.30923	1023.3	354.88
699	YBiO3	-2.65636	2.1193	7.32103	62	313.811	5.88752	6.14947	8.66759	90.0001	90	90.0001	20	29.2	29.4578	13.2	5.11468	3.4	1.74356	69.1769	75.3894	18.654	1.64807	1.04	0.542586	1.171	0.109014	201	62.482	1.036	0.491919	2.712	0.92681	108.695	44.0334	3.8e-07	5.15e-07	5.01595	6.74097	1143.32	1406.27	501.56	675.865	92.76	75.7382	4.5932	5.35594	1048.4	325.7
700	YBiO3	-2.78877	3.0834	7.17437	161	160.113	6.16587	6.16587	6.16587	58.5118	58.5118	58.5118	10	29.2	29.4578	13.2	5.11468	3.4	1.74356	69.1769	75.3894	18.654	1.64807	1.04	0.542586	1.171	0.109014	201	62.482	1.036	0.491919	2.712	0.92681	108.695	44.0334	3.8e-07	5.15e-07	5.01595	6.74097	1143.32	1406.27	501.56	675.865	92.76	75.7382	4.5932	5.35594	1048.4	325.7
701	YBiO3	-2.77409	2.4743	7.18769	148	159.816	6.15131	6.15131	6.15131	58.7319	58.7319	58.7319	10	29.2	29.4578	13.2	5.11468	3.4	1.74356	69.1769	75.3894	18.654	1.64807	1.04	0.542586	1.171	0.109014	201	62.482	1.036	0.491919	2.712	0.92681	108.695	44.0334	3.8e-07	5.15e-07	5.01595	6.74097	1143.32	1406.27	501.56	675.865	92.76	75.7382	4.5932	5.35594	1048.4	325.7
702	YCoO3	-2.64563	0.0933	5.82495	62	223.312	5.25654	5.83502	7.28064	90	90	90	20	18	12.8219	12	5.25357	3	1.26491	39.1674	29.9161	15.726	4.63199	0.99	0.498397	1.11767	0.194341	193	53.8145	0.972	0.446067	2.684	0.949139	103.284	47.4163	1.32e-07	2.35e-07	23.4159	38.8522	1415.92	1628.81	746.28	846.943	92.76	75.7382	5.6532	6.82282	1059.88	314.13
703	YCrO3	-2.89869	2.1502	5.48008	221	57.2393	3.854	3.85382	3.85382	89.971	90	90	5	17.4	12.4515	11.4	5.71314	3	1.26491	37.78	29.1175	15.838	4.41327	1	0.505964	1.152	0.136	194	54.7175	0.996	0.459635	2.64	0.989626	103.37	47.3456	1.45e-07	2.33e-07	22.2159	36.4891	1364.72	1575.06	828.68	955.433	92.76	75.7382	6.5132	8.22495	1038.38	336.755
704	YCrO3	-2.89756	2.1654	5.46023	221	57.4474	3.85965	3.85799	3.85799	89.9385	90	90	5	17.4	12.4515	11.4	5.71314	3	1.26491	37.78	29.1175	15.838	4.41327	1	0.505964	1.152	0.136	194	54.7175	0.996	0.459635	2.64	0.989626	103.37	47.3456	1.45e-07	2.33e-07	22.2159	36.4891	1364.72	1575.06	828.68	955.433	92.76	75.7382	6.5132	8.22495	1038.38	336.755
705	YCrO3	-3.2009	2.4831	5.49248	62	228.44	5.31225	5.61766	7.65489	90	90	90	20	17.4	12.4515	11.4	5.71314	3	1.26491	37.78	29.1175	15.838	4.41327	1	0.505964	1.152	0.136	194	54.7175	0.996	0.459635	2.64	0.989626	103.37	47.3456	1.45e-07	2.33e-07	22.2159	36.4891	1364.72	1575.06	828.68	955.433	92.76	75.7382	6.5132	8.22495	1038.38	336.755
706	YCrO3	-3.19977	2.5494	5.47533	62	229.156	5.31912	5.61784	7.6687	90	90	90	20	17.4	12.4515	11.4	5.71314	3	1.26491	37.78	29.1175	15.838	4.41327	1	0.505964	1.152	0.136	194	54.7175	0.996	0.459635	2.64	0.989626	103.37	47.3456	1.45e-07	2.33e-07	22.2159	36.4891	1364.72	1575.06	828.68	955.433	92.76	75.7382	6.5132	8.22495	1038.38	336.755
707	YCuO3	-2.43104	0.0914	5.9584	14	223.453	5.26203	5.66639	7.49423	89.9012	89.983	89.9835	20	18.4	13.124	12.4	5.08331	3	1.26491	40.09	30.5753	15.814	4.4601	0.99	0.498397	1.128	0.176	192.6	53.47	0.98	0.450067	2.688	0.945778	114.342	43.1948	1.23e-07	2.38e-07	83.4159	158.428	1415.92	1628.81	664.234	759.331	92.76	75.7382	5.0332	5.91696	1056.9	317.014
708	YErO3	-3.93394	4.5444	7.14193	62	282.878	5.68258	5.94375	8.37517	90	90	90	20	26.2	24.1031	13	5.05964	3.8	2.4	60.8326	60.2407	18.084	0.993934	1.07	0.575847	1.17	0.110272	200.8	62.2299	1.09	0.551144	2.556	1.08269	90.5098	62.514	2.92e-07	3.67e-07	6.41595	7.85086	1404.12	1616.01	753.08	855.215	92.76	75.7382	6.3932	8.02188	1025.66	351.934
709	YFeO3	-2.61269	1.0499	5.46594	221	58.5567	3.88392	3.88287	3.88287	89.9731	90	90	5	17.8	12.687	11.8	5.38145	3	1.26491	38.5498	29.5311	15.81	4.4679	1	0.505964	1.1345	0.164745	193.8	54.5322	0.984	0.452265	2.674	0.957781	93.4236	58.4337	1.4e-07	2.33e-07	19.4159	30.9971	1402.72	1614.5	754.88	857.428	92.76	75.7382	5.1732	6.11127	1060.3	313.73
710	YFeO3	-2.94136	1.5605	5.47874	62	233.68	5.33998	5.66418	7.72582	90.0042	89.9871	89.9988	20	17.8	12.687	11.8	5.38145	3	1.26491	38.5498	29.5311	15.81	4.4679	1	0.505964	1.1345	0.164745	193.8	54.5322	0.984	0.452265	2.674	0.957781	93.4236	58.4337	1.4e-07	2.33e-07	19.4159	30.9971	1402.72	1614.5	754.88	857.428	92.76	75.7382	5.1732	6.11127	1060.3	313.73
711	YFeO3	-2.94023	1.697	5.47051	62	234.031	5.34797	5.66137	7.72971	90	90	90	20	17.8	12.687	11.8	5.38145	3	1.26491	38.5498	29.5311	15.81	4.4679	1	0.505964	1.1345	0.164745	193.8	54.5322	0.984	0.452265	2.674	0.957781	93.4236	58.4337	1.4e-07	2.33e-07	19.4159	30.9971	1402.72	1614.5	754.88	857.428	92.76	75.7382	5.1732	6.11127	1060.3	313.73
712	YMnO3	-3.02707	0.127	5.40489	62	235.758	5.34376	5.87622	7.50795	90	90	90	20	17.6	12.5634	11.6	5.53534	3	1.26491	38.3684	29.4269	15.862	4.36647	1	0.505964	1.09367	0.238412	194	54.7175	0.994	0.458327	2.618	1.01213	90.5098	62.514	4.08e-07	5.66e-07	4.97595	6.72372	1242.72	1468	696.48	790.867	92.76	75.7382	5.0532	5.9443	1051.26	322.704
713	YMnO3	-3.0282	0.4052	5.41134	62	235.477	5.34889	5.85538	7.51847	90	90	90	20	17.6	12.5634	11.6	5.53534	3	1.26491	38.3684	29.4269	15.862	4.36647	1	0.505964	1.09367	0.238412	194	54.7175	0.994	0.458327	2.618	1.01213	90.5098	62.514	4.08e-07	5.66e-07	4.97595	6.72372	1242.72	1468	696.48	790.867	92.76	75.7382	5.0532	5.9443	1051.26	322.704
714	YMoO3	-2.97599	2.7289	5.93624	62	260.533	5.51937	5.86301	8.05104	89.9999	90.0002	89.9999	20	21	15.9499	11.4	5.71314	3.2	1.46969	46.5688	37.5057	16.268	3.57962	1.01	0.514198	1.119	0.191948	194	54.7175	1.028	0.484578	2.74	0.907392	104.944	46.1358	1.31e-07	2.35e-07	31.2159	54.2915	1758.32	2084.16	971.88	1175.54	92.76	75.7382	9.6132	13.8855	1044.66	329.727
715	YNiO3	-2.3827	0.034	6.0883	62	213.391	5.20054	5.54895	7.39463	89.9995	89.986	89.9994	20	18.2	12.9677	12.2	5.15364	3	1.26491	39.1195	29.8846	15.71	4.66328	0.99	0.498397	1.112	0.204587	193	53.8145	0.97	0.445152	2.69	0.944119	112.817	43.1324	1.34e-07	2.34e-07	21.6159	35.3094	1413.12	1625.75	738.28	837.39	92.76	75.7382	5.8532	7.1365	1055.22	318.678
716	YNiO3	-2.38157	0.1386	5.91602	14	219.605	5.2415	5.58471	7.50216	90	90.0905	90	20	18.2	12.9677	12.2	5.15364	3	1.26491	39.1195	29.8846	15.71	4.66328	0.99	0.498397	1.112	0.204587	193	53.8145	0.97	0.445152	2.69	0.944119	112.817	43.1324	1.34e-07	2.34e-07	21.6159	35.3094	1413.12	1625.75	738.28	837.39	92.76	75.7382	5.8532	7.1365	1055.22	318.678
717	YSbO3	-2.619	1.3025	5.78821	62	296.825	5.7371	6.04461	8.55934	89.9999	90	90	20	22.8	18.5192	13.2	5.11468	3.2	1.46969	51.7328	44.9806	18.03	0.979265	1.01	0.514198	1.13	0.172511	194.4	55.0948	1.016	0.474367	2.718	0.922397	110.695	43.4034	2e-07	2.53e-07	8.21595	10.2713	1147.92	1408.57	573.436	695.426	92.76	75.7382	6.3532	7.95465	1074.6	301.21
718	YScO3	-3.95843	4.4324	4.79433	33	251.952	5.76218	5.46845	7.9959	90	90	90	20	16.8	12.1885	10.8	6.36867	3	1.26491	36.372	28.5609	17.392	1.54369	1.04	0.542586	1.141	0.153766	196.6	57.3257	1.054	0.509886	2.58	1.05421	94.1298	57.4902	2.3e-07	2.82e-07	6.61595	8.07649	1396.52	1607.89	755.48	858.167	92.76	75.7382	5.6132	6.76118	1034.4	341.373
719	YTmO3	-4.04552	4.0595	6.85398	5	592.772	9.16618	9.1654	9.1654	109.461	109.47	109.479	40	26.4	24.4508	13.2	5.11468	3.8	2.4	61.1677	60.8335	18.212	1.07224	1.07	0.575847	1.183	0.0958958	201	62.482	1.09	0.551144	2.558	1.08027	110.366	43.4822	2.55e-07	3.13e-07	6.81595	8.31524	1220.52	1452.08	756.28	859.155	92.76	75.7382	5.7732	7.00997	1027.14	350.107
720	YTmO3	-3.96009	4.582	7.29099	62	278.621	5.66425	5.92268	8.30527	90	90	90	20	26.4	24.4508	13.2	5.11468	3.8	2.4	61.1677	60.8335	18.212	1.07224	1.07	0.575847	1.183	0.0958958	201	62.482	1.09	0.551144	2.558	1.08027	110.366	43.4822	2.55e-07	3.13e-07	6.81595	8.31524	1220.52	1452.08	756.28	859.155	92.76	75.7382	5.7732	7.00997	1027.14	350.107
721	YVO3	-3.28021	1.6006	5.3047	62	235.206	5.34342	5.7497	7.65569	90	90	90	20	17.2	12.3515	11.2	5.9127	3	1.26491	37.5691	29.0174	16.056	3.98923	0.99	0.498397	1.1195	0.191052	193.4	54.1686	1.024	0.481065	2.634	0.995622	100.63	49.8572	1.6e-07	2.33e-07	9.61595	12.5513	1511.92	1741.39	829.28	956.282	92.76	75.7382	6.9732	9.0202	1037.98	337.214
722	YVO3	-2.9278	0.1793	5.23096	123	59.6305	3.99594	3.863	3.863	89.9704	90	90	5	17.2	12.3515	11.2	5.9127	3	1.26491	37.5691	29.0174	16.056	3.98923	0.99	0.498397	1.1195	0.191052	193.4	54.1686	1.024	0.481065	2.634	0.995622	100.63	49.8572	1.6e-07	2.33e-07	9.61595	12.5513	1511.92	1741.39	829.28	956.282	92.76	75.7382	6.9732	9.0202	1037.98	337.214
723	YVO3	-3.28134	1.5639	5.29797	62	235.505	5.34475	5.74937	7.66394	89.9999	89.9925	89.9999	20	17.2	12.3515	11.2	5.9127	3	1.26491	37.5691	29.0174	16.056	3.98923	0.99	0.498397	1.1195	0.191052	193.4	54.1686	1.024	0.481065	2.634	0.995622	100.63	49.8572	1.6e-07	2.33e-07	9.61595	12.5513	1511.92	1741.39	829.28	956.282	92.76	75.7382	6.9732	9.0202	1037.98	337.214
724	YbBO3	-2.96636	0.0895	6.10508	167	126.123	6.4379	6.4379	6.4379	46.041	46.041	46.041	10	19.8	25.1269	15.4	1.2	3.2	2.4	46.3698	63.3669	16.262	6.6052	0.88	0.445646	1.0548	0.329527	183.2	48.2261	0.908	0.442827	2.692	0.963128	89.5974	63.5867	200000000000	400000000000	13.2159	16.5933	1187.92	1597.91	722.08	908.099	92.76	75.7382	11.6732	19.381	1068.6	305.755
725	YbBO3	-2.82538	0.0207	6.6402	193	347.876	6.64977	6.64977	9.08408	90	90	120	30	19.8	25.1269	15.4	1.2	3.2	2.4	46.3698	63.3669	16.262	6.6052	0.88	0.445646	1.0548	0.329527	183.2	48.2261	0.908	0.442827	2.692	0.963128	89.5974	63.5867	200000000000	400000000000	13.2159	16.5933	1187.92	1597.91	722.08	908.099	92.76	75.7382	11.6732	19.381	1068.6	305.755
726	YbGeO3	-2.78323	1.0216	9.35319	221	52.1388	3.73583	3.73583	3.73583	90	90	90	5	25.2	24.252	15.6	0.8	3.6	2.33238	58.7356	61.2176	18.11	3.66199	0.96	0.468402	1.1268	0.190979	190.6	51.7208	0.98	0.455016	2.686	0.967256	107.987	55.6175	0.00010005	0.000199975	19.8159	25.1302	966.52	1189.81	494.56	539.807	92.76	75.7382	8.0332	12.2312	1060.88	312.829
727	YbHfO3	-3.99018	4.5175	10.527	62	252.088	5.7259	7.96073	5.53039	90	90	90	20	33.2	30.8701	13.6	4.8	4	2.52982	79.9056	78.2878	18.072	3.70896	1.02	0.518266	1.1428	0.161491	195.4	55.9986	1.068	0.526057	2.544	1.09919	84.4698	69.2135	1.18e-07	1.47e-07	12.4159	15.9951	1323.12	1854.97	753.48	964.758	92.76	75.7382	6.7732	9.80109	1040.18	334.589
728	YbTiO3	-3.70003	3.582	7.37126	148	121.154	5.84683	5.84683	5.84683	53.8895	53.8895	53.8895	10	23.2	24.02	13.6	4.8	3.6	2.33238	53.781	60.8934	17.512	4.49429	0.99	0.490306	1.14313	0.160887	194	54.6114	1.036	0.49419	2.592	1.04786	85.7196	67.7421	1.3e-07	1.66e-07	12.2159	15.8673	1059.92	1359.32	640.48	765.353	92.76	75.7382	5.4132	7.24726	1040.24	334.52
729	YbTiO3	-3.75151	2.3173	8.00839	62	223.03	5.33388	5.49145	7.61435	90	90	90	20	23.2	24.02	13.6	4.8	3.6	2.33238	53.781	60.8934	17.512	4.49429	0.99	0.490306	1.14313	0.160887	194	54.6114	1.036	0.49419	2.592	1.04786	85.7196	67.7421	1.3e-07	1.66e-07	12.2159	15.8673	1059.92	1359.32	640.48	765.353	92.76	75.7382	5.4132	7.24726	1040.24	334.52
730	YbTiO3	-3.65471	1.8957	7.80591	221	57.2038	3.85308	3.85308	3.85308	90	90	90	5	23.2	24.02	13.6	4.8	3.6	2.33238	53.781	60.8934	17.512	4.49429	0.99	0.490306	1.14313	0.160887	194	54.6114	1.036	0.49419	2.592	1.04786	85.7196	67.7421	1.3e-07	1.66e-07	12.2159	15.8673	1059.92	1359.32	640.48	765.353	92.76	75.7382	5.4132	7.24726	1040.24	334.52
731	YbVO3	-3.12776	0.4	8.30732	62	217.463	5.2726	5.45927	7.55484	90	90	90	20	23.4	24.0133	13.8	4.4	3.6	2.33238	54.3959	60.8461	17.048	5.23804	0.98	0.482286	1.1283	0.18818	193.2	53.868	1.028	0.487212	2.61	1.03026	94.3196	59.5077	9e-08	1.11e-07	14.0159	17.3192	1083.92	1403.59	688.88	849.132	92.76	75.7382	6.2332	8.77512	1038.66	336.332
732	ZnCO3	-1.83465	3.5639	4.24419	167	98.1394	5.76845	5.76845	5.76845	48.3138	48.3138	48.3138	10	12	9.03327	14.8	1.6	2.4	0.8	25.0836	20.2218	13.306	5.11371	0.77	0.292575	0.992	0.376	173.2	34.5219	0.774	0.217219	2.904	0.715503	108.941	54.9756	2.01e-06	3.99e-06	52.0159	63.987	1150.12	1630.52	931.416	1455.41	92.76	75.7382	25.0032	46.0812	1186.28	165.265
733	ZnCoO3	-1.36551	0.2131	5.52697	15	207.114	6.42082	6.42082	5.09103	84.7683	95.2317	96.1292	20	16.2	10.0876	13.8	2.85657	2.8	0.979796	34.4681	22.7119	13.582	4.69361	0.9	0.367423	1.08567	0.216414	185.8	43.847	0.86	0.269518	2.77	0.823796	97.3602	57.1094	2.4e-08	2.94e-08	44.0159	54.2457	930.12	1210.88	525.016	668.794	92.76	75.7382	4.8432	6.31391	1121.16	239.448
734	ZnCrO3	-1.84549	0.0984	5.48852	62	200.17	5.10553	5.12705	7.64697	90.0079	90.0094	89.9987	20	15.6	9.49947	13.2	3.91918	2.8	0.979796	33.0807	21.3458	13.694	4.53121	0.91	0.38	1.12	0.172511	186.8	45.1105	0.884	0.300506	2.726	0.874474	97.4456	57.0596	3.74e-08	5.05e-08	42.8159	53.0471	878.92	1115.48	607.416	824.19	92.76	75.7382	5.7032	7.89668	1099.66	273.308
735	ZnGeO3	-1.97955	2.1201	5.97067	148	103.485	5.52456	5.52456	5.52456	54.3399	54.3399	54.3399	10	17.2	11.2854	14.8	1.6	2.8	0.979796	37.2094	26.0773	14.974	3.24616	0.88	0.344384	1.086	0.215926	183.6	41.2728	0.864	0.274343	2.796	0.796909	108.373	54.8547	0.000100012	0.000199994	36.0159	47.988	908.72	1170.86	413.696	469.166	92.76	75.7382	7.9632	12.2339	1121.48	238.967
736	ZnGeO3	-1.90715	1.3775	6.21986	161	99.3395	5.09373	5.09373	5.30978	61.3371	61.3371	60	10	17.2	11.2854	14.8	1.6	2.8	0.979796	37.2094	26.0773	14.974	3.24616	0.88	0.344384	1.086	0.215926	183.6	41.2728	0.864	0.274343	2.796	0.796909	108.373	54.8547	0.000100012	0.000199994	36.0159	47.988	908.72	1170.86	413.696	469.166	92.76	75.7382	7.9632	12.2339	1121.48	238.967
737	ZnMoO3	-1.91805	1.4896	6.14965	62	226.113	5.31391	5.33854	7.97055	90.0014	89.9995	90	20	19.2	14.2324	13.2	3.91918	3	1.26491	41.8694	33.1225	14.124	3.96388	0.92	0.393192	1.087	0.214467	186.8	45.1105	0.916	0.347885	2.826	0.769093	99.0198	56.2259	2.3e-08	2.82e-08	51.8159	63.7127	1272.52	1868.05	750.616	1100.77	92.76	75.7382	8.8032	13.8758	1105.94	263.142
738	ZnSeO3	-1.51294	3.9227	4.43224	61	576.563	6.35154	7.5165	12.0768	90	90	90	40	17.6	11.8254	15.2	1.6	2.8	0.979796	38.4734	27.8565	15.532	3.20673	0.86	0.324654	1.13467	0.159187	174.2	34.6895	0.86	0.269518	2.904	0.715503	123.579	65.2314	1.4e-08	2.33e-08	24.1199	47.9404	481.72	484.624	270.216	271.207	445.96	662.73	2.6832	3.07677	1157.28	191.031
739	ZnSeO3	-1.45107	3.4386	5.30533	62	240.839	5.1358	6.00401	7.81049	90	90	90	20	17.6	11.8254	15.2	1.6	2.8	0.979796	38.4734	27.8565	15.532	3.20673	0.86	0.324654	1.13467	0.159187	174.2	34.6895	0.86	0.269518	2.904	0.715503	123.579	65.2314	1.4e-08	2.33e-08	24.1199	47.9404	481.72	484.624	270.216	271.207	445.96	662.73	2.6832	3.07677	1157.28	191.031
740	ZnSiO3	-2.64884	3.3368	4.10857	14	457.491	5.29931	9.31242	9.42866	90	100.511	90	40	13.6	8.52291	14.8	1.6	2.6	0.8	28.2985	19.1366	14.66	3.43162	0.85	0.316228	1.04	0.290103	181.6	39.2153	0.852	0.260338	2.774	0.819502	111.199	55.6839	0.000200012	0.000399994	54.0159	66.8003	924.72	1200.77	508.816	638.798	92.76	75.7382	11.6432	19.4751	1126.38	231.685
741	ZnSiO3	-2.6524	3.3917	4.0957	61	917.856	5.33636	9.30085	18.493	90	90	90	80	13.6	8.52291	14.8	1.6	2.6	0.8	28.2985	19.1366	14.66	3.43162	0.85	0.316228	1.04	0.290103	181.6	39.2153	0.852	0.260338	2.774	0.819502	111.199	55.6839	0.000200012	0.000399994	54.0159	66.8003	924.72	1200.77	508.816	638.798	92.76	75.7382	11.6432	19.4751	1126.38	231.685
742	ZnSiO3	-2.65719	3.4371	4.00329	15	234.761	5.37291	6.88675	6.88675	86.5644	73.7249	73.7249	20	13.6	8.52291	14.8	1.6	2.6	0.8	28.2985	19.1366	14.66	3.43162	0.85	0.316228	1.04	0.290103	181.6	39.2153	0.852	0.260338	2.774	0.819502	111.199	55.6839	0.000200012	0.000399994	54.0159	66.8003	924.72	1200.77	508.816	638.798	92.76	75.7382	11.6432	19.4751	1126.38	231.685
743	ZnSiO3	-2.5582	3.5902	5.02798	148	93.4586	4.80723	4.80723	5.43233	63.7388	63.7388	60	10	13.6	8.52291	14.8	1.6	2.6	0.8	28.2985	19.1366	14.66	3.43162	0.85	0.316228	1.04	0.290103	181.6	39.2153	0.852	0.260338	2.774	0.819502	111.199	55.6839	0.000200012	0.000399994	54.0159	66.8003	924.72	1200.77	508.816	638.798	92.76	75.7382	11.6432	19.4751	1126.38	231.685
744	ZnSnO3	-1.91123	1.9183	6.6734	62	231.031	5.38053	5.40772	7.94018	90	90	90	20	20.8	16.9044	14.8	1.6	3	1.26491	46.4234	40.8966	15.506	3.19995	0.92	0.393192	1.098	0.199038	186.2	44.3459	0.904	0.32946	2.786	0.80696	106.045	54.6034	3.5e-08	4.63e-08	37.4159	48.7632	865.12	1089.98	272.432	273.066	92.76	75.7382	3.0032	3.40806	1110.8	255.421
745	ZnSnO3	-1.93929	1.3278	6.45646	148	119.397	5.68761	5.68761	5.68761	56.4418	56.4418	56.4418	10	20.8	16.9044	14.8	1.6	3	1.26491	46.4234	40.8966	15.506	3.19995	0.92	0.393192	1.098	0.199038	186.2	44.3459	0.904	0.32946	2.786	0.80696	106.045	54.6034	3.5e-08	4.63e-08	37.4159	48.7632	865.12	1089.98	272.432	273.066	92.76	75.7382	3.0032	3.40806	1110.8	255.421
746	ZnSnO3	-1.95265	1.0767	6.55676	161	117.57	5.65912	5.65912	5.65912	56.4281	56.4281	56.4281	10	20.8	16.9044	14.8	1.6	3	1.26491	46.4234	40.8966	15.506	3.19995	0.92	0.393192	1.098	0.199038	186.2	44.3459	0.904	0.32946	2.786	0.80696	106.045	54.6034	3.5e-08	4.63e-08	37.4159	48.7632	865.12	1089.98	272.432	273.066	92.76	75.7382	3.0032	3.40806	1110.8	255.421
747	ZnWO3	-1.77499	2.2105	8.66357	14	227.892	5.33049	5.38402	7.94074	90.2621	89.9438	89.9597	20	25.6	25.6562	13.2	3.91918	3.2	1.6	59.4494	65.0726	14.142	3.94245	0.9	0.367423	1.08533	0.216903	187.6	46.1589	0.924	0.360533	2.866	0.737986	100.337	55.6557	2.28e-08	2.8e-08	58.0159	72.7609	1455.72	2226.51	910.416	1414.04	92.76	75.7382	8.6032	13.484	1123.08	236.569
748	ZrCoO3	-2.74958	1.7275	5.76324	14	228.375	5.02804	5.40888	8.39737	89.9979	89.9449	90.001	20	18.2	13.1514	12.2	4.91528	3	1.26491	39.6311	30.6913	14.554	4.14882	0.94	0.421189	1.08167	0.220328	188.4	47.183	0.948	0.404297	2.706	0.915633	105.581	43.944	9.86e-08	1.69e-07	24.6159	38.728	1630.52	1943.84	812.08	934.435	92.76	75.7382	7.5732	9.1304	1067.88	302.614
749	ZrMnO3	-3.07323	2.9252	5.07275	161	127.115	5.81627	5.81652	5.81702	56.2602	56.2602	56.2633	10	17.8	12.9058	11.8	5.23068	3	1.26491	38.832	30.2268	14.69	3.8913	0.95	0.431277	1.05767	0.256687	189.4	48.3057	0.97	0.419047	2.64	0.982263	92.8062	60.4106	3.75e-07	5.58e-07	6.17595	8.93454	1457.32	1831.62	762.28	887.626	92.76	75.7382	6.9732	8.62856	1059.26	311.727
750	ZrMnO3	-3.07044	3.2405	5.03788	148	127.995	5.81724	5.81724	5.81724	56.5172	56.5172	56.5172	10	17.8	12.9058	11.8	5.23068	3	1.26491	38.832	30.2268	14.69	3.8913	0.95	0.431277	1.05767	0.256687	189.4	48.3057	0.97	0.419047	2.64	0.982263	92.8062	60.4106	3.75e-07	5.58e-07	6.17595	8.93454	1457.32	1831.62	762.28	887.626	92.76	75.7382	6.9732	8.62856	1059.26	311.727
751	ZrPbO3	-2.85929	2.6739	7.53352	38	76.3584	4.17636	4.27679	4.27679	91.6348	90	90	5	29.2	29.1644	13.2	4.66476	3.4	1.74356	69.2844	74.8598	16.872	1.46798	1.03	0.532541	1.1525	0.155644	191.2	50.4635	1.002	0.44741	2.796	0.849767	99.8304	50.4284	1.29e-07	1.73e-07	11.6159	14.6925	1394.92	1805.82	578.602	803.022	92.76	75.7382	5.2872	8.05144	1058.92	312.1
752	ZrPbO3	-2.86642	2.7758	7.74706	55	594.029	5.97892	8.31704	11.9458	90	90	90	40	29.2	29.1644	13.2	4.66476	3.4	1.74356	69.2844	74.8598	16.872	1.46798	1.03	0.532541	1.1525	0.155644	191.2	50.4635	1.002	0.44741	2.796	0.849767	99.8304	50.4284	1.29e-07	1.73e-07	11.6159	14.6925	1394.92	1805.82	578.602	803.022	92.76	75.7382	5.2872	8.05144	1058.92	312.1
753	ZrPbO3	-2.8574	2.6356	7.88993	11	291.636	5.88933	5.92742	8.35431	89.9732	89.967	90.0131	20	29.2	29.1644	13.2	4.66476	3.4	1.74356	69.2844	74.8598	16.872	1.46798	1.03	0.532541	1.1525	0.155644	191.2	50.4635	1.002	0.44741	2.796	0.849767	99.8304	50.4284	1.29e-07	1.73e-07	11.6159	14.6925	1394.92	1805.82	578.602	803.022	92.76	75.7382	5.2872	8.05144	1058.92	312.1
754	ZrPbO3	-2.86197	2.8468	7.59608	32	605.837	6.04234	8.3861	11.9561	90	90	90	40	29.2	29.1644	13.2	4.66476	3.4	1.74356	69.2844	74.8598	16.872	1.46798	1.03	0.532541	1.1525	0.155644	191.2	50.4635	1.002	0.44741	2.796	0.849767	99.8304	50.4284	1.29e-07	1.73e-07	11.6159	14.6925	1394.92	1805.82	578.602	803.022	92.76	75.7382	5.2872	8.05144	1058.92	312.1
755	ZrPbO3	-2.80967	2.2792	7.71505	221	74.5617	4.20893	4.20893	4.20893	90	90	90	5	29.2	29.1644	13.2	4.66476	3.4	1.74356	69.2844	74.8598	16.872	1.46798	1.03	0.532541	1.1525	0.155644	191.2	50.4635	1.002	0.44741	2.796	0.849767	99.8304	50.4284	1.29e-07	1.73e-07	11.6159	14.6925	1394.92	1805.82	578.602	803.022	92.76	75.7382	5.2872	8.05144	1058.92	312.1
[truncated: 14 more columns]
