# Supplementary material for: A progressive learning method for predicting the band gap of ABO3 perovskites using an instrumental variable
Source: Royal Society of Chemistry journal article supplement (doi:10.1039/c9tc06632b), 2020-01-01
Supplement: c9tc06632b2.xlsx [file c9tc06632b2.xlsx]

## Sheet: Supplementary data2-validation 
Supplementary Data2-Validation Set Generated From OQMD
num	formula	spg	spg_num	c_s	Eg	density	Ef	volume	n_atom	a	b	c	alpha	beta	gamma	Z_mea	Z_std	G_mea	G_std	P_mea	P_std	M_mea	M_std	Vmol_mea	Vmol_std	Ra_mea	Ra_std	Ri_mea	Ri_std	Rvdw_mea	Rvdw_std	Rc_mea	Rc_std	X_mea	X_std	EA_mea	EA_std	ER_mea	ER_std	TCD_mea	TCD_std	Tb_mea	Tb_std	Tm_mea	Tm_std	Tc_mea	Tc_std	Ef_mea	Ef_std
0	Nd1Al1O3	Pm-3m	221	cubic	3.123	6.95727	-3.483	52.3232	5	3.74024	3.74024	3.74024	90.1444	90.1444	90.1444	19.4	20.3922	13.4	3.87814	3.4	2.33238	43.8443	50.3787	16.534	3.49832	1.758	0.339435	1.1463	0.235737	194	58.258	1.008	0.494061	2.614	1.0225	92.938	60.2983	1.34e-07	2.55e-07	50.4159	92.5258	1287.12	1477.39	478.974	532.072	92.76	75.7382	3.6932	4.40112
1	La1Al1O3	Pm-3m	221	cubic	3.615	6.57865	-3.553	53.9875	5	3.77947	3.77947	3.77947	90.0673	90.0673	90.0673	18.8	19.1979	12.8	5.03587	3.4	2.33238	42.777	48.252	16.894	3.95941	1.766	0.354378	1.1254	0.227764	194.6	59.3013	1.02	0.515364	2.606	1.03409	102.008	47.7393	1.28e-07	2.44e-07	49.6159	92.8281	1361.12	1585.34	458.174	500.801	92.76	75.7382	3.5132	4.27469
2	La1Cr1O3	Pm-3m	221	cubic	1.81	6.73324	-3.081	58.917	5	3.89117	3.89117	3.89117	90	90	90	21	19.0368	11.4	5.71314	3.6	2.33238	47.78	47.648	16.34	4.95411	1.81	0.373952	1.1784	0.123977	198.6	61.8372	1.032	0.521014	2.616	1.02461	106.516	42.6285	1.48e-07	2.38e-07	21.4159	36.6382	1391.52	1613.69	707.48	858.14	92.76	75.7382	5.4732	7.86204
3	La1Al1O3	Pm-3m	221	cubic	3.713	6.57774	-3.553	53.995	5	3.77965	3.77965	3.77965	90.0483	90.0483	90.0483	18.8	19.1979	12.8	5.03587	3.4	2.33238	42.777	48.252	16.894	3.95941	1.766	0.354378	1.1254	0.227764	194.6	59.3013	1.02	0.515364	2.606	1.03409	102.008	47.7393	1.28e-07	2.44e-07	49.6159	92.8281	1361.12	1585.34	458.174	500.801	92.76	75.7382	3.5132	4.27469
4	Ce1Cr1O3	Pm-3m	221	cubic	1.619	6.76349	-2.992	58.9507	5	3.89191	3.89191	3.89191	90	90	90	21.2	19.4155	11.6	5.42586	3.6	2.33238	48.0221	48.1112	16	4.57073	1.808	0.370643	1.16	0.130231	196.6	58.6706	1.012	0.486555	2.62	1.01871	109.99	37.9537	1.73e-07	2.88e-07	21.0159	36.7387	1369.52	1581.92	682.48	845.357	92.76	75.7382	5.3332	7.85408
5	K1Nb1O3	P4mm	99	tetragonal	1.727	4.54969	-2.693	65.6972	5	4.00754	4.00754	4.09064	90	90	90	16.8	12.8281	10.8	6.49307	3	1.26491	36.0006	29.8262	21.77	12.3468	1.898	0.496806	1.224	0.225708	195.8	56.3503	1.096	0.575555	2.546	1.12167	111.939	37.7453	4.54e-08	6.07e-08	30.8159	40.4175	1263.92	1911.66	650.186	1055.56	537.36	844.944	5.9592	10.4523
6	Nb1Ag1O3	Pm-3m	221	cubic	1.599	6.51455	-1.989	63.4114	5	3.9877	3.9877	3.9877	90	90	90	22.4	17.7381	12.8	4.35431	3.2	1.46969	49.7546	41.6113	14.636	3.3409	1.77	0.306985	1.13733	0.172284	191.8	51.2031	0.968	0.406664	2.768	0.830022	127.387	20.389	3.37e-08	5.95e-08	96.8159	167.898	1544.52	1959.4	829.866	1063.31	92.76	75.7382	7.7532	10.4453
7	Nd1Cr1O3	Pm-3m	221	cubic	1.794	7.00799	-2.976	57.8717	5	3.86802	3.86802	3.86802	90	90	90	21.6	20.1752	12	4.89898	3.6	2.33238	48.8473	49.6931	15.98	4.55034	1.802	0.360799	1.1993	0.129807	198	60.8769	1.02	0.50024	2.624	1.01283	97.4456	57.0596	1.54e-07	2.49e-07	22.2159	36.4891	1317.52	1509.26	728.28	870.823	92.76	75.7382	5.6532	7.88688
8	La1Al1O3	Pm-3m	221	cubic	3.585	6.55862	-3.554	54.1524	5	3.78331	3.78331	3.78331	90	90	90	18.8	19.1979	12.8	5.03587	3.4	2.33238	42.777	48.252	16.894	3.95941	1.766	0.354378	1.1254	0.227764	194.6	59.3013	1.02	0.515364	2.606	1.03409	102.008	47.7393	1.28e-07	2.44e-07	49.6159	92.8281	1361.12	1585.34	458.174	500.801	92.76	75.7382	3.5132	4.27469
9	La1Fe1O3	Pm-3m	221	cubic	0.268	6.8479	-2.656	58.8639	5	3.89	3.89	3.89	90	90	90	21.4	19.1165	11.8	5.38145	3.6	2.33238	48.5497	47.7409	16.312	5.00564	1.806	0.371354	1.1609	0.157922	198.4	61.6882	1.02	0.515364	2.65	0.994706	96.5694	55.2509	1.43e-07	2.39e-07	18.6159	31.1006	1429.52	1651.59	633.68	735.422	92.76	75.7382	4.1332	5.35931
10	Ce1Al1O3	Pm-3m	221	cubic	3.139	6.59824	-3.47	54.1319	5	3.78284	3.78284	3.78284	90	90	90	19	19.5959	13	4.64758	3.4	2.33238	43.0191	48.7344	16.554	3.52166	1.764	0.350634	1.107	0.226971	192.6	55.8484	1	0.48	2.61	1.02828	105.482	43.9734	1.53e-07	2.93e-07	49.2159	92.9892	1339.12	1552.56	433.174	465.36	92.76	75.7382	3.3732	4.19513
11	K1I1O3	R3m	160	trigonal	2.295	3.86524	-1.225	91.9366	5	4.51374	4.51374	4.51374	90.7834	89.2166	90.7834	19.2	17.4287	13.2	6.11228	3	1.26491	42.8002	42.9932	24.748	11.0797	1.858	0.480267	1.31467	0.102796	185.4	48.537	1.056	0.548219	2.76	1.01595	153.293	79.4793	200000000000000	400000000000000	20.1057	39.9475	352	368.545	177.556	151.185	701.16	803.252	2.1512	2.92082
12	Al1Bi1O3	Pm-3m	221	cubic	1.819	8.91643	-2.263	52.8829	5	3.75352	3.75352	3.75352	90	90	90	24	29.5635	15.2	1.16619	3	1.54919	56.792	76.213	16.678	3.67278	1.694	0.225175	1.098	0.228749	191	53.1413	0.932	0.366955	2.79	0.806573	111.123	39.7305	2.65e-07	5.17e-07	48.6159	93.2432	979.92	1130.75	328.454	357.026	92.76	75.7382	4.4532	5.18253
13	Ga1Bi1O3	Pm-3m	221	cubic	1.469	9.45327	-1.573	57.3877	5	3.85721	3.85721	3.85721	90	90	90	27.6	29.0971	15.2	1.16619	3.2	1.6	65.3403	74.7733	17.038	3.03307	1.7	0.229347	1.115	0.197737	192.4	54.1021	0.93	0.365294	2.83	0.75004	111.068	39.8255	2.88e-07	5.09e-07	7.41595	11.2252	916.92	1032.55	202.342	196.175	92.76	75.7382	3.4312	4.27411
14	K1I1O3	R3m	160	trigonal	2.3	4.2131	-1.225	84.3458	5	4.38593	4.38593	4.38593	90.782	89.218	90.782	19.2	17.4287	13.2	6.11228	3	1.26491	42.8002	42.9932	24.748	11.0797	1.858	0.480267	1.31467	0.102796	185.4	48.537	1.056	0.548219	2.76	1.01595	153.293	79.4793	200000000000000	400000000000000	20.1057	39.9475	352	368.545	177.556	151.185	701.16	803.252	2.1512	2.92082
15	Cs1Br1O3	R3m	160	trigonal	4.077	4.47253	-0.951	96.8314	5	4.5927	4.5927	4.5927	89.0241	89.0241	89.0241	22.8	19.1979	13.2	6.11228	3.2	1.6	52.1615	47.3547	28.56	21.2107	1.968	0.742089	1.2945	0.296329	196.8	76.875	1.094	0.67497	2.814	1.02893	158.594	90.8376	2e+17	4e+17	7.23995	14.3801	309.32	330.87	146.358	112.705	597.56	690.732	1.7112	2.16864
17	Na1Nb1O3	Pm-3m	221	cubic	1.748	4.34899	-2.666	62.5784	5	3.97016	3.97016	3.97016	90	90	90	15.2	12.9522	10.8	6.49307	2.8	1.16619	32.7789	30.1854	17.338	4.09524	1.802	0.346549	1.152	0.170458	191.2	50.4951	1.016	0.460678	2.568	1.08818	112.835	36.2489	4.02e-08	5.9e-08	38.8159	54.7405	1288.72	1909.29	657.054	1053.61	607.36	984.642	6.0132	10.4341
18	Co1Bi1O3	P4mm	99	tetragonal	0.629	7.92857	-1.032	66.1637	5	3.748	3.748	4.71	90	90	90	26.8	29.0475	14.4	2.72764	3.2	1.6	63.1824	74.7714	16.012	4.91514	1.726	0.253267	1.11667	0.194751	194	55.3534	0.92	0.357547	2.844	0.731289	115.545	32.2998	2.72e-07	5.15e-07	21.6159	39.3135	1061.52	1265.29	495.36	663.972	92.76	75.7382	5.5532	6.74103
19	Ba1Np1O3	P4/mmm	123	tetragonal	2.366	7.94511	-3.339	88.2665	5	4.45923	4.44902	4.44909	90	90	90	34.6	34.6156	11.4	5.8515	4.2	2.85657	84.465	89.5812	20.366	9.17336	1.926	0.505632	1.254	0.155126	204.6	67.6804	1.156	0.637294	2.514	1.14381	87.3764	65.794	3.08e-07	4.65e-07	4.81595	6.98621	1337.32	1669.33	414.88	441.924	92.76	75.7382	3.7332	4.34658
20	Fe1Bi1O3	Cm	8	monoclinic	1.135	7.55989	-1.534	68.7121	5	4.05891	4.05891	4.1739	91.4192	88.5808	90.9992	26.6	29.0489	14.2	3.1241	3.2	1.6	62.5647	74.8167	16.096	4.75577	1.734	0.262267	1.1335	0.16533	194.8	56.0371	0.932	0.366955	2.834	0.744623	105.684	49.5104	2.8e-07	5.11e-07	17.6159	31.3445	1048.32	1243.07	503.96	680.474	92.76	75.7382	5.0732	6.01184
21	K1Br1O3	R3m	160	trigonal	3.517	3.27163	-0.933	84.7622	5	4.403	4.403	4.403	86	86	86	15.6	10.5943	13.2	6.11228	2.8	0.979796	33.4001	24.9136	23.56	11.2292	1.832	0.476462	1.2365	0.203639	181.8	47.684	1.018	0.53218	2.82	1.01713	159.17	90.1251	2e+17	4e+17	20.0399	39.98	326.92	364.766	153.346	122.749	654.56	801.821	1.7592	2.17912
23	Fe1Bi1O3	Cm	8	monoclinic	1.27	7.92889	-1.534	65.5143	5	3.98535	3.98535	4.12931	91.6986	88.3014	91.2333	26.6	29.0489	14.2	3.1241	3.2	1.6	62.5647	74.8167	16.096	4.75577	1.734	0.262267	1.1335	0.16533	194.8	56.0371	0.932	0.366955	2.834	0.744623	105.684	49.5104	2.8e-07	5.11e-07	17.6159	31.3445	1048.32	1243.07	503.96	680.474	92.76	75.7382	5.0732	6.01184
24	K1Nb1O3	Amm2	38	orthorhombic	2.041	4.5462	-2.694	65.7475	5	3.9983	4.05512	4.05512	90.238	90	90	16.8	12.8281	10.8	6.49307	3	1.26491	36.0006	29.8262	21.77	12.3468	1.898	0.496806	1.224	0.225708	195.8	56.3503	1.096	0.575555	2.546	1.12167	111.939	37.7453	4.54e-08	6.07e-08	30.8159	40.4175	1263.92	1911.66	650.186	1055.56	537.36	844.944	5.9592	10.4523
25	K1Br1O3	R3m	160	trigonal	3.518	3.41527	-0.933	81.1973	5	4.3403	4.3403	4.3403	86.018	86.018	86.018	15.6	10.5943	13.2	6.11228	2.8	0.979796	33.4001	24.9136	23.56	11.2292	1.832	0.476462	1.2365	0.203639	181.8	47.684	1.018	0.53218	2.82	1.01713	159.17	90.1251	2e+17	4e+17	20.0399	39.98	326.92	364.766	153.346	122.749	654.56	801.821	1.7592	2.17912
28	Ba2Ni2O6	P6_3/mmc	194	hexagonal	0.641	6.13866	-1.738	132.017	10	5.629	5.629	4.811	90	90	120	21.6	18.8637	12	5.51362	3.2	1.6	48.8037	47.2494	19.366	10.2812	1.842	0.453802	1.202	0.24758	198.6	62.7681	1.03	0.554401	2.626	1.0488	109.684	49.2041	8.24e-08	1.32e-07	21.8159	35.2855	1119.92	1303.56	578.48	681.439	92.76	75.7382	5.1732	6.72574
33	Gd4Ga4O12	Pnma	62	orthorhombic	3.049	8.09832	-2.953	225.528	20	5.334	5.548	7.621	90	90	90	23.8	21.9854	14.2	2.4	3.6	2.33238	54.9942	55.1996	16.756	2.66613	1.754	0.322837	1.123	0.195131	192.2	53.7788	0.994	0.472	2.668	0.964353	92.8836	60.3445	2.9e-07	5.13e-07	8.01595	11.3201	1254.12	1463.38	410.462	595.079	92.76	75.7382	3.2512	3.96344
34	Gd4Ga4O12	Pnma	62	orthorhombic	4.257	8.29801	-2.953	220.101	20	5.27432	5.51931	7.56085	90	90	90	23.8	21.9854	14.2	2.4	3.6	2.33238	54.9942	55.1996	16.756	2.66613	1.754	0.322837	1.123	0.195131	192.2	53.7788	0.994	0.472	2.668	0.964353	92.8836	60.3445	2.9e-07	5.13e-07	8.01595	11.3201	1254.12	1463.38	410.462	595.079	92.76	75.7382	3.2512	3.96344
38	Ho4Al4O12	Pnma	62	orthorhombic	4.996	7.83709	-3.594	203.331	20	5.182	5.324	7.37	90	90	90	20.8	23.181	14.8	1.46969	3.4	2.33238	47.982	58.6286	16.164	3.128	1.74	0.306203	1.0992	0.228431	191.6	54.1502	0.99	0.462601	2.632	0.996863	92.938	60.2983	1.68e-07	3.23e-07	50.2159	92.5989	1211.12	1374.31	566.374	675.756	92.76	75.7382	5.6732	6.96724
39	Ho4Al4O12	Pnma	62	orthorhombic	6.104	8.04341	-3.594	198.115	20	5.13441	5.2743	7.31582	90	90	90	20.8	23.181	14.8	1.46969	3.4	2.33238	47.982	58.6286	16.164	3.128	1.74	0.306203	1.0992	0.228431	191.6	54.1502	0.99	0.462601	2.632	0.996863	92.938	60.2983	1.68e-07	3.23e-07	50.2159	92.5989	1211.12	1374.31	566.374	675.756	92.76	75.7382	5.6732	6.96724
40	Na4Br4O12	P2_13	198	cubic	3.859	3.32168	-0.915	301.73	20	6.70717	6.70717	6.70717	90	90	90	14	10.5641	13.2	6.11228	2.6	0.8	30.1784	25.0098	19.128	2.50774	1.736	0.296014	1.1645	0.146222	177.2	38.979	0.938	0.389482	2.842	0.973908	160.066	89.0344	2e+17	4e+17	28.0399	55.98	351.72	412.9	160.214	133.312	724.56	939.201	1.8132	2.19588
41	Na4Br4O12	P2_13	198	cubic	4.521	3.79041	-0.915	264.416	20	6.41844	6.41844	6.41844	90	90	90	14	10.5641	13.2	6.11228	2.6	0.8	30.1784	25.0098	19.128	2.50774	1.736	0.296014	1.1645	0.146222	177.2	38.979	0.938	0.389482	2.842	0.973908	160.066	89.0344	2e+17	4e+17	28.0399	55.98	351.72	412.9	160.214	133.312	724.56	939.201	1.8132	2.19588
47	Na2N2O6	R-3c	167	trigonal	2.408	2.26162	-1.245	124.81	10	5.07	5.07	6.32479	90	113.628	60	8.4	1.35647	12.8	5.9127	2.2	0.4	16.9989	3.09324	17.88	3.30021	1.676	0.297227	1.114	0.24508	173.2	38.8968	0.846	0.377974	2.858	0.976369	95.159	58.5516	9.8e-09	1.96e-08	28.0211	55.9894	300.792	427.633	119.664	125.644	632.6	970.262	0.7252	0.938922
48	Na2N2O6	R-3c	167	trigonal	3.164	2.71525	-1.245	103.959	10	5.76987	5.76987	5.76987	50.0685	50.0685	50.0685	8.4	1.35647	12.8	5.9127	2.2	0.4	16.9989	3.09324	17.88	3.30021	1.676	0.297227	1.114	0.24508	173.2	38.8968	0.846	0.377974	2.858	0.976369	95.159	58.5516	9.8e-09	1.96e-08	28.0211	55.9894	300.792	427.633	119.664	125.644	632.6	970.262	0.7252	0.938922
49	Li2I2O6	P6_3	173	hexagonal	3.076	4.4883	-1.24	134.554	10	5.4815	5.4815	5.1709	90	90	120	16	18.6011	13.2	6.11228	2.6	1.2	36.3687	45.4036	18.164	4.13505	1.672	0.192914	1.19067	0.145425	173.2	28.5265	0.916	0.338562	2.792	0.955037	155.543	76.5846	200000000000000	400000000000000	17.1057	33.9475	468.6	590.579	200.988	180.286	901.16	1189.1	2.2852	2.94125
50	Li2I2O6	P6_3	173	hexagonal	3.244	5.14253	-1.24	117.436	10	5.30455	5.3046	4.82022	90	90	120.022	16	18.6011	13.2	6.11228	2.6	1.2	36.3687	45.4036	18.164	4.13505	1.672	0.192914	1.19067	0.145425	173.2	28.5265	0.916	0.338562	2.792	0.955037	155.543	76.5846	200000000000000	400000000000000	17.1057	33.9475	468.6	590.579	200.988	180.286	901.16	1189.1	2.2852	2.94125
51	K1Nb1O3	P4mm	99	tetragonal	0.789	4.60713	-2.693	64.878	5	3.996	3.996	4.063	90	90	90	16.8	12.8281	10.8	6.49307	3	1.26491	36.0006	29.8262	21.77	12.3468	1.898	0.496806	1.224	0.225708	195.8	56.3503	1.096	0.575555	2.546	1.12167	111.939	37.7453	4.54e-08	6.07e-08	30.8159	40.4175	1263.92	1911.66	650.186	1055.56	537.36	844.944	5.9592	10.4523
52	K1Nb1O3	P4mm	99	tetragonal	1.631	4.63653	-2.693	64.4668	5	3.99372	3.99372	4.04185	90	90	90	16.8	12.8281	10.8	6.49307	3	1.26491	36.0006	29.8262	21.77	12.3468	1.898	0.496806	1.224	0.225708	195.8	56.3503	1.096	0.575555	2.546	1.12167	111.939	37.7453	4.54e-08	6.07e-08	30.8159	40.4175	1263.92	1911.66	650.186	1055.56	537.36	844.944	5.9592	10.4523
53	La4Cr4O12	Pnma	62	orthorhombic	1.098	6.77676	-3.165	234.155	20	5.514	5.478	7.752	90	90	90	21	19.0368	11.4	5.71314	3.6	2.33238	47.78	47.648	16.34	4.95411	1.81	0.373952	1.1784	0.123977	198.6	61.8372	1.032	0.521014	2.616	1.02461	106.516	42.6285	1.48e-07	2.38e-07	21.4159	36.6382	1391.52	1613.69	707.48	858.14	92.76	75.7382	5.4732	7.86204
54	La4Cr4O12	Pnma	62	orthorhombic	2.062	6.7664	-3.165	234.513	20	5.52685	5.47357	7.75209	90	90	90	21	19.0368	11.4	5.71314	3.6	2.33238	47.78	47.648	16.34	4.95411	1.81	0.373952	1.1784	0.123977	198.6	61.8372	1.032	0.521014	2.616	1.02461	106.516	42.6285	1.48e-07	2.38e-07	21.4159	36.6382	1391.52	1613.69	707.48	858.14	92.76	75.7382	5.4732	7.86204
55	Nd4Cr4O12	Pnma	62	orthorhombic	1.24	7.15603	-3.118	226.698	20	5.382	5.481	7.685	90	90	90	21.6	20.1752	12	4.89898	3.6	2.33238	48.8473	49.6931	15.98	4.55034	1.802	0.360799	1.1993	0.129807	198	60.8769	1.02	0.50024	2.624	1.01283	97.4456	57.0596	1.54e-07	2.49e-07	22.2159	36.4891	1317.52	1509.26	728.28	870.823	92.76	75.7382	5.6532	7.88688
56	Nd4Cr4O12	Pnma	62	orthorhombic	2.33	7.062	-3.118	229.716	20	5.42013	5.50506	7.69874	90	90	90	21.6	20.1752	12	4.89898	3.6	2.33238	48.8473	49.6931	15.98	4.55034	1.802	0.360799	1.1993	0.129807	198	60.8769	1.02	0.50024	2.624	1.01283	97.4456	57.0596	1.54e-07	2.49e-07	22.2159	36.4891	1317.52	1509.26	728.28	870.823	92.76	75.7382	5.6532	7.88688
57	Gd4Cr4O12	Pnma	62	orthorhombic	1.507	7.67428	-3.183	222.647	20	5.312	5.515	7.6	90	90	90	22.4	21.7035	12.8	4.11825	3.6	2.33238	51.4489	54.7068	15.842	4.41694	1.792	0.344697	1.159	0.130859	194.8	55.9121	1.008	0.479767	2.638	0.9925	97.4456	57.0596	2.87e-07	5.14e-07	21.0159	36.7387	1347.52	1550.74	785.88	914.942	92.76	75.7382	6.2332	8.07631
58	Gd4Cr4O12	Pnma	62	orthorhombic	2.379	7.7116	-3.183	221.57	20	5.26894	5.54791	7.57981	90	90	90	22.4	21.7035	12.8	4.11825	3.6	2.33238	51.4489	54.7068	15.842	4.41694	1.792	0.344697	1.159	0.130859	194.8	55.9121	1.008	0.479767	2.638	0.9925	97.4456	57.0596	2.87e-07	5.14e-07	21.0159	36.7387	1347.52	1550.74	785.88	914.942	92.76	75.7382	6.2332	8.07631
60	Mg2C2O6	R-3c	167	trigonal	4.413	3.00288	-2.29	93.2482	10	4.637	4.637	5.67838	114.098	114.098	60	8.4	1.95959	12.8	5.45527	2.2	0.4	16.8628	4.02903	14.274	4.6767	1.598	0.096	0.988	0.377274	175.6	39.1234	0.814	0.296081	2.836	0.837248	108.941	54.9756	2.01e-06	4e-06	60.0159	73.7434	1186.72	1632.83	977.48	1450.77	92.76	75.7382	25.2732	45.9808
61	Mg2C2O6	R-3c	167	trigonal	5.27	3.21447	-2.29	87.1103	10	5.47233	5.47233	5.47233	49.5029	49.5029	49.5029	8.4	1.95959	12.8	5.45527	2.2	0.4	16.8628	4.02903	14.274	4.6767	1.598	0.096	0.988	0.377274	175.6	39.1234	0.814	0.296081	2.836	0.837248	108.941	54.9756	2.01e-06	4e-06	60.0159	73.7434	1186.72	1632.83	977.48	1450.77	92.76	75.7382	25.2732	45.9808
65	Ba2Mn2O6	P6_3/mmc	194	hexagonal	1.771	6.01508	-2.379	132.655	10	5.60838	5.60838	4.87067	90	90	120.016	21	18.6976	11.4	5.8515	3.2	1.6	48.0526	47.1159	19.518	10.0951	1.858	0.459408	1.18367	0.2821	199.6	63.4558	1.054	0.56248	2.552	1.10742	87.3764	65.794	3.56e-07	5.58e-07	5.17595	7.08364	949.52	1054.18	536.68	612.575	92.76	75.7382	4.3732	5.34347
66	Nd2Al2O6	R-3c	167	trigonal	3.833	6.89407	-3.511	105.606	10	5.28934	5.28934	5.28934	119.591	60.4089	119.591	19.4	20.3922	13.4	3.87814	3.4	2.33238	43.8443	50.3787	16.534	3.49832	1.758	0.339435	1.1463	0.235737	194	58.258	1.008	0.494061	2.614	1.0225	92.938	60.2983	1.34e-07	2.55e-07	50.4159	92.5258	1287.12	1477.39	478.974	532.072	92.76	75.7382	3.6932	4.40112
67	Nd2Al2O6	R-3c	167	trigonal	4.502	7.01024	-3.511	103.856	10	5.25426	5.25426	5.25426	60.5548	60.5548	60.5548	19.4	20.3922	13.4	3.87814	3.4	2.33238	43.8443	50.3787	16.534	3.49832	1.758	0.339435	1.1463	0.235737	194	58.258	1.008	0.494061	2.614	1.0225	92.938	60.2983	1.34e-07	2.55e-07	50.4159	92.5258	1287.12	1477.39	478.974	532.072	92.76	75.7382	3.6932	4.40112
68	Ag8I8O24	Pca2_1	29	orthorhombic	1.698	5.8908	-0.578	637.675	40	7.265	15.17	5.786	90	90	90	24.8	20.663	15.2	2.13542	3.2	1.46969	56.5542	50.0327	17.614	4.89561	1.73	0.260461	1.228	0.0708551	181.4	41.4613	0.928	0.352727	2.982	0.606577	168.741	63.4846	200000000000000	400000000000000	86.1057	171.947	632.6	912.352	357.236	457.302	256.56	287.524	3.9452	4.69537
70	K1Nb1O3	Amm2	38	orthorhombic	1.415	4.61892	-2.694	64.7125	5	3.971	4.03688	4.03688	90.2409	90	90	16.8	12.8281	10.8	6.49307	3	1.26491	36.0006	29.8262	21.77	12.3468	1.898	0.496806	1.224	0.225708	195.8	56.3503	1.096	0.575555	2.546	1.12167	111.939	37.7453	4.54e-08	6.07e-08	30.8159	40.4175	1263.92	1911.66	650.186	1055.56	537.36	844.944	5.9592	10.4523
71	K1Nb1O3	Amm2	38	orthorhombic	1.776	4.63378	-2.694	64.505	5	4.01785	3.99582	4.01785	90	90.0819	90	16.8	12.8281	10.8	6.49307	3	1.26491	36.0006	29.8262	21.77	12.3468	1.898	0.496806	1.224	0.225708	195.8	56.3503	1.096	0.575555	2.546	1.12167	111.939	37.7453	4.54e-08	6.07e-08	30.8159	40.4175	1263.92	1911.66	650.186	1055.56	537.36	844.944	5.9592	10.4523
76	Fe2Bi2O6	R3c	161	trigonal	0.506	8.31258	-1.56	124.981	10	5.5876	5.5876	5.63676	119.712	119.712	60	26.6	29.0489	14.2	3.1241	3.2	1.6	62.5647	74.8167	16.096	4.75577	1.734	0.262267	1.1335	0.16533	194.8	56.0371	0.932	0.366955	2.834	0.744623	105.684	49.5104	2.8e-07	5.11e-07	17.6159	31.3445	1048.32	1243.07	503.96	680.474	92.76	75.7382	5.0732	6.01184
77	Fe2Bi2O6	R3c	161	trigonal	1.399	8.62938	-1.56	120.392	10	5.53202	5.53202	5.53202	60.2511	60.2511	60.2511	26.6	29.0489	14.2	3.1241	3.2	1.6	62.5647	74.8167	16.096	4.75577	1.734	0.262267	1.1335	0.16533	194.8	56.0371	0.932	0.366955	2.834	0.744623	105.684	49.5104	2.8e-07	5.11e-07	17.6159	31.3445	1048.32	1243.07	503.96	680.474	92.76	75.7382	5.0732	6.01184
80	Na4I4O12	Pnma	62	orthorhombic	2.9	4.43268	-1.204	296.532	20	5.74	6.37	8.11	90	90	90	17.6	17.7381	13.2	6.11228	2.8	1.16619	39.5785	43.7468	20.316	3.67196	1.762	0.310252	1.24267	0.0416547	180.8	40.4297	0.976	0.418454	2.782	0.974031	154.189	78.3077	200000000000000	400000000000000	28.1057	55.9474	376.8	414.745	184.424	158.837	771.16	936.948	2.2052	2.92612
81	Na4I4O12	Pnma	62	orthorhombic	3.562	5.02542	-1.204	261.557	20	5.63405	6.1225	7.58257	90	90	90	17.6	17.7381	13.2	6.11228	2.8	1.16619	39.5785	43.7468	20.316	3.67196	1.762	0.310252	1.24267	0.0416547	180.8	40.4297	0.976	0.418454	2.782	0.974031	154.189	78.3077	200000000000000	400000000000000	28.1057	55.9474	376.8	414.745	184.424	158.837	771.16	936.948	2.2052	2.92612
82	Ba2Ni2O6	P6_3mc	186	hexagonal	0.514	6.13813	-1.737	132.028	10	5.631	5.631	4.808	90	90	120	21.6	18.8637	12	5.51362	3.2	1.6	48.8037	47.2494	19.366	10.2812	1.842	0.453802	1.202	0.24758	198.6	62.7681	1.03	0.554401	2.626	1.0488	109.684	49.2041	8.24e-08	1.32e-07	21.8159	35.2855	1119.92	1303.56	578.48	681.439	92.76	75.7382	5.1732	6.72574
84	La4Er4O12	Pnma	62	orthorhombic	4.682	8.07248	-3.776	291.41	20	6.01218	5.80399	8.35115	90	90	90	29.8	26.9251	13	5.05964	4.4	2.93939	70.8325	67.7525	18.586	1.94913	1.856	0.413889	1.1964	0.0899102	205.4	68.1164	1.126	0.597649	2.532	1.11295	93.6556	59.7034	2.95e-07	3.7e-07	5.61595	6.8747	1430.92	1653.04	631.88	732.544	92.76	75.7382	5.3532	7.63301
85	La4Er4O12	Pnma	62	orthorhombic	4.538	8.07248	-3.776	291.41	20	6.01218	5.80399	8.35115	90	90	90	29.8	26.9251	13	5.05964	4.4	2.93939	70.8325	67.7525	18.586	1.94913	1.856	0.413889	1.1964	0.0899102	205.4	68.1164	1.126	0.597649	2.532	1.11295	93.6556	59.7034	2.95e-07	3.7e-07	5.61595	6.8747	1430.92	1653.04	631.88	732.544	92.76	75.7382	5.3532	7.63301
86	La4Er4O12	Pnma	62	orthorhombic	3.625	7.8399	-3.776	300.055	20	6.07	5.85	8.45	90	90	90	29.8	26.9251	13	5.05964	4.4	2.93939	70.8325	67.7525	18.586	1.94913	1.856	0.413889	1.1964	0.0899102	205.4	68.1164	1.126	0.597649	2.532	1.11295	93.6556	59.7034	2.95e-07	3.7e-07	5.61595	6.8747	1430.92	1653.04	631.88	732.544	92.76	75.7382	5.3532	7.63301
89	Dy4Cr4O12	Pnma	62	orthorhombic	1.486	7.91816	-3.202	220.194	20	5.271	5.525	7.561	90	90	90	22.8	22.4713	13.2	3.91918	3.6	2.33238	52.4989	56.74	15.664	4.26515	1.786	0.335237	1.1702	0.125476	195.2	56.5169	1.004	0.473016	2.64	0.989626	97.4456	57.0596	2.11e-07	3.61e-07	21.0159	36.7387	1210.92	1372.99	804.88	932.164	92.76	75.7382	6.4532	8.1901
90	Dy4Cr4O12	Pnma	62	orthorhombic	2.404	7.99976	-3.202	217.947	20	5.21571	5.54757	7.53244	90	90	90	22.8	22.4713	13.2	3.91918	3.6	2.33238	52.4989	56.74	15.664	4.26515	1.786	0.335237	1.1702	0.125476	195.2	56.5169	1.004	0.473016	2.64	0.989626	97.4456	57.0596	2.11e-07	3.61e-07	21.0159	36.7387	1210.92	1372.99	804.88	932.164	92.76	75.7382	6.4532	8.1901
91	Lu2B2O6	R-3c	167	trigonal	4.584	6.86647	-3.406	113.07	10	4.9153	4.9153	6.10382	113.743	113.743	60	20	25.5265	15.6	1.35647	3.2	2.4	46.7552	64.1374	14.85	5.23253	1.744	0.292411	1.0382	0.329729	181	44.109	0.9	0.427083	2.726	0.907736	96.5454	54.4473	200000000000	400000000000	8.61595	11.08	1629.12	1892.08	887.68	1028.84	92.76	75.7382	14.5332	19.6371
92	Lu2B2O6	R-3c	167	trigonal	5.888	7.22148	-3.406	107.511	10	5.9275	5.9275	5.9275	48.6035	48.6035	48.6035	20	25.5265	15.6	1.35647	3.2	2.4	46.7552	64.1374	14.85	5.23253	1.744	0.292411	1.0382	0.329729	181	44.109	0.9	0.427083	2.726	0.907736	96.5454	54.4473	200000000000	400000000000	8.61595	11.08	1629.12	1892.08	887.68	1028.84	92.76	75.7382	14.5332	19.6371
93	Li4As4O12	C2/c	15	monoclinic	2.89	3.65507	-1.782	235.989	20	5.25	6.93825	6.93825	94.3805	104.909	75.0915	12	10.6771	12.8	5.9127	2.4	0.8	25.9722	24.7249	15.61	2.14342	1.646	0.154609	1.068	0.247095	170	25.6437	0.884	0.300506	2.696	0.987068	112.026	35.907	8.5e-08	1.28e-07	27.0159	34.8588	554.52	613.505	341.618	404.828	1077.36	1228.49	6.2732	10.7673
94	Li4As4O12	C2/c	15	monoclinic	3.073	4.10823	-1.782	209.958	20	6.60248	6.60248	5.03241	78.2104	101.79	95.1294	12	10.6771	12.8	5.9127	2.4	0.8	25.9722	24.7249	15.61	2.14342	1.646	0.154609	1.068	0.247095	170	25.6437	0.884	0.300506	2.696	0.987068	112.026	35.907	8.5e-08	1.28e-07	27.0159	34.8588	554.52	613.505	341.618	404.828	1077.36	1228.49	6.2732	10.7673
95	Gd4Fe4O12	Pnma	62	orthorhombic	1.029	7.75746	-2.766	223.555	20	5.58599	7.58312	5.2776	90	90	90	22.8	21.7476	13.2	3.48712	3.6	2.33238	52.2186	54.7362	15.814	4.47155	1.788	0.341667	1.1415	0.161289	194.6	55.7337	0.996	0.473016	2.672	0.96082	87.4994	65.657	2.82e-07	5.15e-07	18.2159	31.183	1385.52	1591.2	712.08	808.167	92.76	75.7382	4.8932	5.84587
98	Er4Fe4O12	Pnma	62	orthorhombic	1.249	8.32343	-2.795	216.341	20	5.18426	5.56775	7.49504	90	90	90	23.6	23.2689	14	3.09839	3.6	2.33238	54.2204	58.5882	15.526	4.23946	1.778	0.325724	1.1325	0.165937	194.6	55.7337	0.986	0.455702	2.678	0.951723	87.4994	65.657	1.92e-07	3.36e-07	19.0159	31.0386	1309.12	1492.87	755.48	858.159	92.76	75.7382	6.8732	8.3713
101	Cd2C2O6	R-3c	167	trigonal	2.324	5.02523	-1.598	113.949	10	4.923	4.923	6.12802	66.3168	113.683	120	15.6	16.2185	14.8	1.6	2.6	1.2	34.484	38.9941	14.074	4.70543	1.688	0.255687	1.034	0.372859	175.2	38.3531	0.814	0.296081	2.912	0.701524	108.941	54.9756	2.01e-06	3.99e-06	47.4159	59.6115	1122.12	1630.97	911.724	1459.17	92.76	75.7382	24.7932	46.1635
102	Cd2C2O6	R-3c	167	trigonal	3.296	5.22931	-1.598	109.502	10	5.90511	5.90511	5.90511	49.5162	49.5162	49.5162	15.6	16.2185	14.8	1.6	2.6	1.2	34.484	38.9941	14.074	4.70543	1.688	0.255687	1.034	0.372859	175.2	38.3531	0.814	0.296081	2.912	0.701524	108.941	54.9756	2.01e-06	3.99e-06	47.4159	59.6115	1122.12	1630.97	911.724	1459.17	92.76	75.7382	24.7932	46.1635
103	K4I4O12	P1	1	triclinic	2.428	4.00117	-1.233	355.253	20	7.71	7.701	7.698	109.06	109.27	109.29	19.2	17.4287	13.2	6.11228	3	1.26491	42.8002	42.9932	24.748	11.0797	1.858	0.480267	1.31467	0.102796	185.4	48.537	1.056	0.548219	2.76	1.01595	153.293	79.4793	200000000000000	400000000000000	20.1057	39.9475	352	368.545	177.556	151.185	701.16	803.252	2.1512	2.92082
104	K4I4O12	P1	1	triclinic	2.163	4.53966	-1.233	313.114	20	7.40855	7.40194	7.39927	109.17	109.471	109.574	19.2	17.4287	13.2	6.11228	3	1.26491	42.8002	42.9932	24.748	11.0797	1.858	0.480267	1.31467	0.102796	185.4	48.537	1.056	0.548219	2.76	1.01595	153.293	79.4793	200000000000000	400000000000000	20.1057	39.9475	352	368.545	177.556	151.185	701.16	803.252	2.1512	2.92082
105	Fe1Bi1O3	R3m	160	trigonal	1.166	8.51201	-1.524	61.0262	5	3.93734	3.93734	3.93734	89.3171	89.3171	89.3171	26.6	29.0489	14.2	3.1241	3.2	1.6	62.5647	74.8167	16.096	4.75577	1.734	0.262267	1.1335	0.16533	194.8	56.0371	0.932	0.366955	2.834	0.744623	105.684	49.5104	2.8e-07	5.11e-07	17.6159	31.3445	1048.32	1243.07	503.96	680.474	92.76	75.7382	5.0732	6.01184
107	Na4Nb4O12	Cmcm	63	orthorhombic	0.779	4.47868	-2.67	243.066	20	5.55758	5.55758	7.8696	90	90	90.0671	15.2	12.9522	10.8	6.49307	2.8	1.16619	32.7789	30.1854	17.338	4.09524	1.802	0.346549	1.152	0.170458	191.2	50.4951	1.016	0.460678	2.568	1.08818	112.835	36.2489	4.02e-08	5.9e-08	38.8159	54.7405	1288.72	1909.29	657.054	1053.61	607.36	984.642	6.0132	10.4341
108	Na4Nb4O12	Cmcm	63	orthorhombic	1.908	4.68401	-2.67	232.41	20	5.45369	5.45369	7.8149	90	90	90.8543	15.2	12.9522	10.8	6.49307	2.8	1.16619	32.7789	30.1854	17.338	4.09524	1.802	0.346549	1.152	0.170458	191.2	50.4951	1.016	0.460678	2.568	1.08818	112.835	36.2489	4.02e-08	5.9e-08	38.8159	54.7405	1288.72	1909.29	657.054	1053.61	607.36	984.642	6.0132	10.4341
109	Na2Nb2O6	P4/mbm	127	tetragonal	0.784	4.45943	-2.679	122.057	10	5.5639	5.5639	3.9428	90	90	90	15.2	12.9522	10.8	6.49307	2.8	1.16619	32.7789	30.1854	17.338	4.09524	1.802	0.346549	1.152	0.170458	191.2	50.4951	1.016	0.460678	2.568	1.08818	112.835	36.2489	4.02e-08	5.9e-08	38.8159	54.7405	1288.72	1909.29	657.054	1053.61	607.36	984.642	6.0132	10.4341
110	Na2Nb2O6	P4/mbm	127	tetragonal	1.781	4.63143	-2.679	117.524	10	5.43618	5.43618	3.97686	90	90	90	15.2	12.9522	10.8	6.49307	2.8	1.16619	32.7789	30.1854	17.338	4.09524	1.802	0.346549	1.152	0.170458	191.2	50.4951	1.016	0.460678	2.568	1.08818	112.835	36.2489	4.02e-08	5.9e-08	38.8159	54.7405	1288.72	1909.29	657.054	1053.61	607.36	984.642	6.0132	10.4341
112	Ba2Mn2O6	P6_3/mmc	194	hexagonal	1.769	6.03508	-2.377	132.216	10	5.60363	5.60363	4.86259	90	90	120.012	21	18.6976	11.4	5.8515	3.2	1.6	48.0526	47.1159	19.518	10.0951	1.858	0.459408	1.18367	0.2821	199.6	63.4558	1.054	0.56248	2.552	1.10742	87.3764	65.794	3.56e-07	5.58e-07	5.17595	7.08364	949.52	1054.18	536.68	612.575	92.76	75.7382	4.3732	5.34347
113	Ba4Mn4O12	P6_3/mmc	194	hexagonal	0.898	6.33381	-2.368	251.96	20	5.61041	5.61041	9.24446	90	90	120.016	21	18.6976	11.4	5.8515	3.2	1.6	48.0526	47.1159	19.518	10.0951	1.858	0.459408	1.18367	0.2821	199.6	63.4558	1.054	0.56248	2.552	1.10742	87.3764	65.794	3.56e-07	5.58e-07	5.17595	7.08364	949.52	1054.18	536.68	612.575	92.76	75.7382	4.3732	5.34347
118	Nd4Fe4O12	Pnma	62	orthorhombic	1.087	7.09728	-2.705	232.176	20	5.42834	5.54155	7.71828	90	90	90	22	20.2386	12.4	4.45421	3.6	2.33238	49.617	49.7657	15.952	4.6042	1.798	0.358017	1.1818	0.164774	197.8	60.7236	1.008	0.494061	2.658	0.982291	87.4994	65.657	1.49e-07	2.5e-07	19.4159	30.9971	1355.52	1551.54	654.48	752.226	92.76	75.7382	4.3132	5.44021
119	Dy4Fe4O12	Pnma	62	orthorhombic	0.262	7.81902	-2.782	226.255	20	5.302	5.598	7.623	90	90	90	23.2	22.5069	13.6	3.2	3.6	2.33238	53.2686	56.7541	15.636	4.32052	1.782	0.332048	1.1527	0.158197	195	56.3418	0.992	0.466064	2.674	0.957781	87.4994	65.657	2.05e-07	3.62e-07	18.2159	31.183	1248.92	1422.18	731.08	829.306	92.76	75.7382	5.1132	6.05101
120	Dy4Fe4O12	Pnma	62	orthorhombic	1.19	8.05091	-2.782	219.738	20	5.22713	5.57971	7.53409	90	90	90	23.2	22.5069	13.6	3.2	3.6	2.33238	53.2686	56.7541	15.636	4.32052	1.782	0.332048	1.1527	0.158197	195	56.3418	0.992	0.466064	2.674	0.957781	87.4994	65.657	2.05e-07	3.62e-07	18.2159	31.183	1248.92	1422.18	731.08	829.306	92.76	75.7382	5.1132	6.05101
121	Ho4Fe4O12	Pnma	62	orthorhombic	0.265	7.95809	-2.789	224.33	20	5.278	5.591	7.602	90	90	90	23.4	22.8876	13.8	3.1241	3.6	2.33238	53.7547	57.6902	15.582	4.27951	1.78	0.328877	1.1347	0.164631	195.4	56.9547	0.99	0.462601	2.676	0.954748	87.4994	65.657	1.83e-07	3.18e-07	19.2159	31.0153	1279.52	1457.3	741.88	841.85	92.76	75.7382	6.2932	7.50421
122	Ho4Fe4O12	Pnma	62	orthorhombic	1.223	8.18918	-2.789	217.999	20	5.20587	5.57409	7.51256	90	90	90	23.4	22.8876	13.8	3.1241	3.6	2.33238	53.7547	57.6902	15.582	4.27951	1.78	0.328877	1.1347	0.164631	195.4	56.9547	0.99	0.462601	2.676	0.954748	87.4994	65.657	1.83e-07	3.18e-07	19.2159	31.0153	1279.52	1457.3	741.88	841.85	92.76	75.7382	6.2932	7.50421
123	Lu4Fe4O12	Pnma	62	orthorhombic	0.284	8.4657	-2.809	218.753	20	5.213	5.547	7.565	90	90	90	24.2	24.4164	14.6	3.32265	3.6	2.33238	55.762	61.5679	15.39	4.15319	1.768	0.310252	1.1267	0.169878	191.4	51.0592	0.98	0.445421	2.684	0.94269	94.0614	57.7472	1.36e-07	2.25e-07	19.2159	31.0153	1415.92	1632.66	780.08	889.014	92.76	75.7382	7.2932	9.04029
124	Lu4Fe4O12	Pnma	62	orthorhombic	1.126	8.75852	-2.809	211.44	20	5.13164	5.53545	7.44351	90	90	90	24.2	24.4164	14.6	3.32265	3.6	2.33238	55.762	61.5679	15.39	4.15319	1.768	0.310252	1.1267	0.169878	191.4	51.0592	0.98	0.445421	2.684	0.94269	94.0614	57.7472	1.36e-07	2.25e-07	19.2159	31.0153	1415.92	1632.66	780.08	889.014	92.76	75.7382	7.2932	9.04029
125	Na2Bi2O6	R-3	148	trigonal	0.739	6.5038	-1.451	142.962	10	5.56	5.56	6.23058	116.499	116.499	60	23.6	29.7227	12.8	5.9127	3	1.54919	55.9937	76.5413	19.434	2.6575	1.78	0.324654	1.195	0.0888819	196	57.1314	1.004	0.446927	2.654	1.0225	113.344	35.9185	2.7e-07	5.15e-07	29.6159	55.2784	652.72	721.817	215.934	204.835	607.36	984.642	2.8332	4.13722
126	Na2Bi2O6	R-3	148	trigonal	1.464	6.89668	-1.451	134.818	10	5.9855	5.9855	5.9855	55.2301	55.2301	55.2301	23.6	29.7227	12.8	5.9127	3	1.54919	55.9937	76.5413	19.434	2.6575	1.78	0.324654	1.195	0.0888819	196	57.1314	1.004	0.446927	2.654	1.0225	113.344	35.9185	2.7e-07	5.15e-07	29.6159	55.2784	652.72	721.817	215.934	204.835	607.36	984.642	2.8332	4.13722
127	La4Fe4O12	Pnma	62	orthorhombic	0.821	6.80368	-2.753	236.986	20	5.52634	5.5061	7.78826	90	90	90	21.4	19.1165	11.8	5.38145	3.6	2.33238	48.5497	47.7409	16.312	5.00564	1.806	0.371354	1.1609	0.157922	198.4	61.6882	1.02	0.515364	2.65	0.994706	96.5694	55.2509	1.43e-07	2.39e-07	18.6159	31.1006	1429.52	1651.59	633.68	735.422	92.76	75.7382	4.1332	5.35931
128	Li2Nb2O6	R3c	161	trigonal	3.566	4.88248	-2.737	100.565	10	5.41287	5.41287	5.41287	55.5527	55.5527	55.5527	13.6	13.8362	10.8	6.49307	2.6	1.2	29.5691	31.8624	15.186	2.75119	1.712	0.261258	1.1	0.197585	183.6	43.4401	0.956	0.395656	2.578	1.07321	114.188	34.0442	4.94e-08	6.31e-08	27.8159	35.4185	1380.52	1911.74	673.618	1049.62	737.36	1244.26	6.0932	10.4092
129	Li2Nb2O6	R3c	161	trigonal	2.57	4.62905	-2.737	106.071	10	5.14829	5.14829	5.49444	117.937	62.0631	120	13.6	13.8362	10.8	6.49307	2.6	1.2	29.5691	31.8624	15.186	2.75119	1.712	0.261258	1.1	0.197585	183.6	43.4401	0.956	0.395656	2.578	1.07321	114.188	34.0442	4.94e-08	6.31e-08	27.8159	35.4185	1380.52	1911.74	673.618	1049.62	737.36	1244.26	6.0932	10.4092
130	Er4Cr4O12	Pnma	62	orthorhombic	1.521	8.1946	-3.215	216.623	20	5.223	5.516	7.519	90	90	90	23.2	23.2413	13.6	3.87814	3.6	2.33238	53.4507	58.5871	15.554	4.18375	1.782	0.329023	1.15	0.137695	194.8	55.9121	0.998	0.462964	2.644	0.983902	97.4456	57.0596	1.97e-07	3.35e-07	21.8159	36.555	1271.12	1447.67	829.28	956.043	92.76	75.7382	8.2132	9.78902
131	Er4Cr4O12	Pnma	62	orthorhombic	2.445	8.28303	-3.215	214.31	20	5.17425	5.53312	7.48559	90	90	90	23.2	23.2413	13.6	3.87814	3.6	2.33238	53.4507	58.5871	15.554	4.18375	1.782	0.329023	1.15	0.137695	194.8	55.9121	0.998	0.462964	2.644	0.983902	97.4456	57.0596	1.97e-07	3.35e-07	21.8159	36.555	1271.12	1447.67	829.28	956.043	92.76	75.7382	8.2132	9.78902
132	Mn2C2O6	R-3c	167	trigonal	2.724	3.69934	-1.934	103.193	10	5.905	5.905	5.905	47.72	47.72	47.72	11	7.04273	13.8	3.48712	2.4	0.8	22.9894	16.0489	12.944	5.44756	1.662	0.206146	0.945667	0.400427	174.4	36.8163	0.792	0.252618	2.884	0.750802	108.941	54.9756	2.29e-06	3.9e-06	29.5759	55.294	1380.92	1698.66	1096.68	1465.8	92.76	75.7382	26.1732	45.6907
133	Mn2C2O6	R-3c	167	trigonal	3.398	3.92124	-1.934	97.354	10	5.68419	5.68419	5.68419	49.4165	49.4165	49.4165	11	7.04273	13.8	3.48712	2.4	0.8	22.9894	16.0489	12.944	5.44756	1.662	0.206146	0.945667	0.400427	174.4	36.8163	0.792	0.252618	2.884	0.750802	108.941	54.9756	2.29e-06	3.9e-06	29.5759	55.294	1380.92	1698.66	1096.68	1465.8	92.76	75.7382	26.1732	45.6907
134	Na1Nb1O3	Pm-3m	221	cubic	1.908	4.40344	-2.667	61.8046	5	3.95433	3.95254	3.95433	90	90.1723	90	15.2	12.9522	10.8	6.49307	2.8	1.16619	32.7789	30.1854	17.338	4.09524	1.802	0.346549	1.152	0.170458	191.2	50.4951	1.016	0.460678	2.568	1.08818	112.835	36.2489	4.02e-08	5.9e-08	38.8159	54.7405	1288.72	1909.29	657.054	1053.61	607.36	984.642	6.0132	10.4341
135	Na1Nb1O3	P4/mmm	123	tetragonal	0.98	4.60063	-2.667	59.1555	5	3.9092	3.8713	3.9092	90	90.75	90	15.2	12.9522	10.8	6.49307	2.8	1.16619	32.7789	30.1854	17.338	4.09524	1.802	0.346549	1.152	0.170458	191.2	50.4951	1.016	0.460678	2.568	1.08818	112.835	36.2489	4.02e-08	5.9e-08	38.8159	54.7405	1288.72	1909.29	657.054	1053.61	607.36	984.642	6.0132	10.4341
136	Na1Nb1O3	Pm-3m	221	cubic	0.806	4.49947	-2.666	60.4856	5	3.9254	3.9254	3.9254	90	90	90	15.2	12.9522	10.8	6.49307	2.8	1.16619	32.7789	30.1854	17.338	4.09524	1.802	0.346549	1.152	0.170458	191.2	50.4951	1.016	0.460678	2.568	1.08818	112.835	36.2489	4.02e-08	5.9e-08	38.8159	54.7405	1288.72	1909.29	657.054	1053.61	607.36	984.642	6.0132	10.4341
137	Na1Nb1O3	Pm-3m	221	cubic	1.763	4.39752	-2.666	61.8878	5	3.9555	3.9555	3.9555	90	90	90	15.2	12.9522	10.8	6.49307	2.8	1.16619	32.7789	30.1854	17.338	4.09524	1.802	0.346549	1.152	0.170458	191.2	50.4951	1.016	0.460678	2.568	1.08818	112.835	36.2489	4.02e-08	5.9e-08	38.8159	54.7405	1288.72	1909.29	657.054	1053.61	607.36	984.642	6.0132	10.4341
138	Na1Nb1O3	Pm-3m	221	cubic	1.763	4.39509	-2.666	61.922	5	3.95623	3.95623	3.95623	90	90	90	15.2	12.9522	10.8	6.49307	2.8	1.16619	32.7789	30.1854	17.338	4.09524	1.802	0.346549	1.152	0.170458	191.2	50.4951	1.016	0.460678	2.568	1.08818	112.835	36.2489	4.02e-08	5.9e-08	38.8159	54.7405	1288.72	1909.29	657.054	1053.61	607.36	984.642	6.0132	10.4341
139	Na1Nb1O3	Pm-3m	221	cubic	0.792	4.44828	-2.666	61.1816	5	3.9404	3.9404	3.9404	90	90	90	15.2	12.9522	10.8	6.49307	2.8	1.16619	32.7789	30.1854	17.338	4.09524	1.802	0.346549	1.152	0.170458	191.2	50.4951	1.016	0.460678	2.568	1.08818	112.835	36.2489	4.02e-08	5.9e-08	38.8159	54.7405	1288.72	1909.29	657.054	1053.61	607.36	984.642	6.0132	10.4341
140	La1Al1O3	Pm-3m	221	cubic	2.791	6.52918	-3.553	54.3965	5	3.789	3.789	3.789	90.12	90.12	90.12	18.8	19.1979	12.8	5.03587	3.4	2.33238	42.777	48.252	16.894	3.95941	1.766	0.354378	1.1254	0.227764	194.6	59.3013	1.02	0.515364	2.606	1.03409	102.008	47.7393	1.28e-07	2.44e-07	49.6159	92.8281	1361.12	1585.34	458.174	500.801	92.76	75.7382	3.5132	4.27469
141	La1Al1O3	Pm-3m	221	cubic	3.659	6.69204	-3.553	53.0727	5	3.758	3.758	3.758	90.0167	90.0167	90.0167	18.8	19.1979	12.8	5.03587	3.4	2.33238	42.777	48.252	16.894	3.95941	1.766	0.354378	1.1254	0.227764	194.6	59.3013	1.02	0.515364	2.606	1.03409	102.008	47.7393	1.28e-07	2.44e-07	49.6159	92.8281	1361.12	1585.34	458.174	500.801	92.76	75.7382	3.5132	4.27469
142	La1Co1O3	Pm-3m	221	cubic	0.526	7.62284	-2.416	53.5525	5	3.76929	3.76929	3.76929	90	90	90	21.6	19.1687	12	5.25357	3.6	2.33238	49.1674	47.8511	16.228	5.16081	1.798	0.366628	1.14407	0.190933	197.6	61.115	1.008	0.51078	2.66	0.986631	106.43	42.7133	1.35e-07	2.41e-07	22.6159	39.0169	1442.72	1665.37	625.08	721.728	92.76	75.7382	4.6132	6.23891
143	Ce1Cr1O3	Pm-3m	221	cubic	1.061	6.77347	-2.992	58.8639	5	3.89	3.89	3.89	90	90	90	21.2	19.4155	11.6	5.42586	3.6	2.33238	48.0221	48.1112	16	4.57073	1.808	0.370643	1.16	0.130231	196.6	58.6706	1.012	0.486555	2.62	1.01871	109.99	37.9537	1.73e-07	2.88e-07	21.0159	36.7387	1369.52	1581.92	682.48	845.357	92.76	75.7382	5.3332	7.85408
144	Ce1Cr1O3	Pm-3m	221	cubic	1.597	6.86543	-2.992	58.0754	5	3.87255	3.87255	3.87255	90	90	90	21.2	19.4155	11.6	5.42586	3.6	2.33238	48.0221	48.1112	16	4.57073	1.808	0.370643	1.16	0.130231	196.6	58.6706	1.012	0.486555	2.62	1.01871	109.99	37.9537	1.73e-07	2.88e-07	21.0159	36.7387	1369.52	1581.92	682.48	845.357	92.76	75.7382	5.3332	7.85408
145	Nd1Cr1O3	Pm-3m	221	cubic	1.126	6.88986	-2.976	58.8639	5	3.89	3.89	3.89	90	90	90	21.6	20.1752	12	4.89898	3.6	2.33238	48.8473	49.6931	15.98	4.55034	1.802	0.360799	1.1993	0.129807	198	60.8769	1.02	0.50024	2.624	1.01283	97.4456	57.0596	1.54e-07	2.49e-07	22.2159	36.4891	1317.52	1509.26	728.28	870.823	92.76	75.7382	5.6532	7.88688
146	Nd1Cr1O3	Pm-3m	221	cubic	1.629	7.13356	-2.976	56.853	5	3.84519	3.84519	3.84519	90	90	90	21.6	20.1752	12	4.89898	3.6	2.33238	48.8473	49.6931	15.98	4.55034	1.802	0.360799	1.1993	0.129807	198	60.8769	1.02	0.50024	2.624	1.01283	97.4456	57.0596	1.54e-07	2.49e-07	22.2159	36.4891	1317.52	1509.26	728.28	870.823	92.76	75.7382	5.6532	7.88688
152	Cd2Ge2O6	R-3	148	trigonal	1.024	6.90659	-1.681	112.063	10	5.0988	5.0988	5.78271	116.159	116.159	60	20.8	16.473	14.8	1.6	3	1.26491	46.6098	39.5433	15.742	1.99163	1.77	0.306985	1.128	0.190725	185.6	44.0572	0.904	0.32946	2.804	0.785483	108.373	54.8547	0.000100014	0.000199993	31.4159	40.1851	880.72	1165.7	394.004	458.999	92.76	75.7382	7.7532	12.2517
153	Cd2Ge2O6	R-3	148	trigonal	1.929	6.91441	-1.681	111.937	10	5.74351	5.74351	5.74351	52.9828	52.9828	52.9828	20.8	16.473	14.8	1.6	3	1.26491	46.6098	39.5433	15.742	1.99163	1.77	0.306985	1.128	0.190725	185.6	44.0572	0.904	0.32946	2.804	0.785483	108.373	54.8547	0.000100014	0.000199993	31.4159	40.1851	880.72	1165.7	394.004	458.999	92.76	75.7382	7.7532	12.2517
154	Ca4Ge4O12	Pnma	62	orthorhombic	2.676	5.21764	-2.477	204.595	20	5.23594	5.26534	7.42119	90	90	90	15.2	9.6	12.8	5.45527	2.8	0.979796	32.1432	22.2927	18.382	4.1674	1.796	0.343895	1.138	0.189779	188.2	47.935	0.972	0.441017	2.668	0.996983	108.847	53.9185	0.000100007	0.000199997	52.0159	77.5522	1024.12	1219.34	498.16	543.858	92.76	75.7382	8.2012	12.2313
155	Ca4Ge4O12	Pnma	62	orthorhombic	2.796	5.22404	-2.477	204.344	20	5.23207	5.26436	7.41896	90	90	90	15.2	9.6	12.8	5.45527	2.8	0.979796	32.1432	22.2927	18.382	4.1674	1.796	0.343895	1.138	0.189779	188.2	47.935	0.972	0.441017	2.668	0.996983	108.847	53.9185	0.000100007	0.000199997	52.0159	77.5522	1024.12	1219.34	498.16	543.858	92.76	75.7382	8.2012	12.2313
156	Ca4Ge4O12	Pnma	62	orthorhombic	1.586	5.17294	-2.477	206.363	20	5.2607	5.2688	7.4452	90	90	90	15.2	9.6	12.8	5.45527	2.8	0.979796	32.1432	22.2927	18.382	4.1674	1.796	0.343895	1.138	0.189779	188.2	47.935	0.972	0.441017	2.668	0.996983	108.847	53.9185	0.000100007	0.000199997	52.0159	77.5522	1024.12	1219.34	498.16	543.858	92.76	75.7382	8.2012	12.2313
157	Mn2Ni2O6	R-3	148	trigonal	1.655	5.76017	-1.596	93.1891	10	5.29619	5.29619	5.29619	55.1462	55.1462	55.1462	15.4	9.11263	13	3.79473	2.8	0.979796	32.3259	20.0311	13.204	5.09571	1.716	0.241379	1.03367	0.278712	187	45.3431	0.876	0.29152	2.758	0.843431	106.893	54.6491	3.02e-07	5.69e-07	19.7759	35.7391	1158.12	1335.39	682.28	771.34	92.76	75.7382	6.2132	7.44592
158	Mn2Co2O6	R-3	148	trigonal	1.241	5.66671	-1.623	94.8665	10	5.33681	5.33681	5.33681	54.9568	54.9568	54.9568	15.2	8.84081	12.8	3.96989	2.8	0.979796	32.3739	20.0943	13.22	5.075	1.722	0.247903	1.03933	0.272911	187	45.3431	0.878	0.293557	2.75	0.851493	97.3602	57.1094	3e-07	5.7e-07	21.5759	39.3274	1160.92	1339.65	690.28	782.274	92.76	75.7382	6.0132	7.15591
161	Li2N2O6	R-3c	167	trigonal	3.23	2.82615	-1.252	81.02	10	5.30809	5.30809	5.30809	50.0988	50.0988	50.0988	6.8	1.93907	12.8	5.9127	2	0	13.7892	3.50999	15.728	2.00554	1.586	0.117576	1.062	0.257091	165.6	24.0133	0.786	0.258426	2.868	0.956627	96.5122	57.6295	1.9e-08	3.8e-08	17.0211	33.9894	392.592	611.224	136.228	158.763	762.6	1230.25	0.8052	1.0987
162	K1Br1O3	R3m	160	trigonal	2.52	3.27163	-0.933	84.7622	5	4.403	4.403	4.403	86	86	86	15.6	10.5943	13.2	6.11228	2.8	0.979796	33.4001	24.9136	23.56	11.2292	1.832	0.476462	1.2365	0.203639	181.8	47.684	1.018	0.53218	2.82	1.01713	159.17	90.1251	2e+17	4e+17	20.0399	39.98	326.92	364.766	153.346	122.749	654.56	801.821	1.7592	2.17912
163	K1Br1O3	R3m	160	trigonal	3.151	3.78203	-0.933	73.3233	5	4.1912	4.1912	4.1912	86.9625	86.9625	86.9625	15.6	10.5943	13.2	6.11228	2.8	0.979796	33.4001	24.9136	23.56	11.2292	1.832	0.476462	1.2365	0.203639	181.8	47.684	1.018	0.53218	2.82	1.01713	159.17	90.1251	2e+17	4e+17	20.0399	39.98	326.92	364.766	153.346	122.749	654.56	801.821	1.7592	2.17912
164	Fe2B2O6	R-3c	167	trigonal	0.627	4.25295	-2.167	89.5321	10	4.626	4.626	5.52013	114.772	114.772	60	11	7.58947	13.8	3.1241	2.4	0.8	22.9308	16.5793	12.712	5.75629	1.704	0.228526	1.0085	0.338318	177.2	37.1505	0.8	0.233238	2.838	0.740281	92.8972	59.0151	200000000000	400000000000	21.4159	31.0992	1520.92	1784.4	864.88	1006.62	92.76	75.7382	12.8932	19.2843
165	Fe2B2O6	R-3c	167	trigonal	1.514	4.37024	-2.167	87.1293	10	5.41519	5.41519	5.41519	50.5072	50.5072	50.5072	11	7.58947	13.8	3.1241	2.4	0.8	22.9308	16.5793	12.712	5.75629	1.704	0.228526	1.0085	0.338318	177.2	37.1505	0.8	0.233238	2.838	0.740281	92.8972	59.0151	200000000000	400000000000	21.4159	31.0992	1520.92	1784.4	864.88	1006.62	92.76	75.7382	12.8932	19.2843
166	Ba4Cr4O12	P1	1	triclinic	0.769	6.20891	-2.516	253.881	20	5.62518	5.62353	9.27027	90.72	89.662	120.024	20.8	18.659	11.2	6.01332	3.2	1.6	47.4643	47.0446	19.494	10.1241	1.86	0.460261	1.242	0.175317	199.6	63.4558	1.056	0.563333	2.574	1.08822	100.236	52.3741	9.34e-08	1.33e-07	22.4159	36.4627	1071.52	1228.27	668.88	839.572	92.76	75.7382	5.8332	7.92801
169	Ca4Mn4O12	Pnma	62	orthorhombic	0.768	4.1079	-2.412	231.243	20	5.53671	7.72049	5.40969	90	90	90	13.8	7.27736	11.4	5.8515	2.8	0.979796	28.6028	16.1354	17.126	5.96778	1.784	0.333623	1.11367	0.237263	191.4	50.9886	0.99	0.451664	2.576	1.07187	85.0596	68.4874	2.95e-07	5.73e-07	41.5759	79.2692	872.32	975.121	559.68	631.409	92.76	75.7382	4.4812	5.42058
170	Mg4Ge4O12	C2/c	15	monoclinic	2.073	4.43382	-2.404	217.134	20	5.1592	6.55677	6.55677	94.1328	98.0551	81.9449	13.6	9.32952	12.8	5.45527	2.6	0.8	28.9886	22.0615	15.942	1.74063	1.68	0.22987	1.082	0.219854	186	44.6363	0.904	0.32946	2.728	0.899675	108.373	54.8547	0.000100009	0.000199996	44.0159	62.4708	945.32	1181.58	459.76	504.288	92.76	75.7382	8.2332	12.2323
171	Mg4Ge4O12	C2/c	15	monoclinic	3.026	4.61361	-2.404	208.673	20	6.44735	6.44735	5.112	82.6821	97.3179	94.3153	13.6	9.32952	12.8	5.45527	2.6	0.8	28.9886	22.0615	15.942	1.74063	1.68	0.22987	1.082	0.219854	186	44.6363	0.904	0.32946	2.728	0.899675	108.373	54.8547	0.000100009	0.000199996	44.0159	62.4708	945.32	1181.58	459.76	504.288	92.76	75.7382	8.2332	12.2323
174	Nd1Al1O3	Pm-3m	221	cubic	2.259	6.90544	-3.483	52.7159	5	3.74964	3.74964	3.74964	90.3622	90.3622	90.3622	19.4	20.3922	13.4	3.87814	3.4	2.33238	43.8443	50.3787	16.534	3.49832	1.758	0.339435	1.1463	0.235737	194	58.258	1.008	0.494061	2.614	1.0225	92.938	60.2983	1.34e-07	2.55e-07	50.4159	92.5258	1287.12	1477.39	478.974	532.072	92.76	75.7382	3.6932	4.40112
175	Nd2Al2O6	Pm-3m	221	cubic	3.087	7.07483	-3.483	102.907	10	5.25935	5.25935	5.25935	60.0169	60.0169	60.0169	19.4	20.3922	13.4	3.87814	3.4	2.33238	43.8443	50.3787	16.534	3.49832	1.758	0.339435	1.1463	0.235737	194	58.258	1.008	0.494061	2.614	1.0225	92.938	60.2983	1.34e-07	2.55e-07	50.4159	92.5258	1287.12	1477.39	478.974	532.072	92.76	75.7382	3.6932	4.40112
180	Na4Nb4O12	Pmc2_1	26	orthorhombic	2.613	4.80018	-2.661	226.786	20	5.51403	7.67597	5.35813	90	90	90	15.2	12.9522	10.8	6.49307	2.8	1.16619	32.7789	30.1854	17.338	4.09524	1.802	0.346549	1.152	0.170458	191.2	50.4951	1.016	0.460678	2.568	1.08818	112.835	36.2489	4.02e-08	5.9e-08	38.8159	54.7405	1288.72	1909.29	657.054	1053.61	607.36	984.642	6.0132	10.4341
181	Na4Nb4O12	Pmc2_1	26	orthorhombic	1.553	4.54754	-2.661	239.385	20	5.569	7.79	5.518	90	90	90	15.2	12.9522	10.8	6.49307	2.8	1.16619	32.7789	30.1854	17.338	4.09524	1.802	0.346549	1.152	0.170458	191.2	50.4951	1.016	0.460678	2.568	1.08818	112.835	36.2489	4.02e-08	5.9e-08	38.8159	54.7405	1288.72	1909.29	657.054	1053.61	607.36	984.642	6.0132	10.4341
182	Mg2Ge2O6	R-3	148	trigonal	3.343	4.9894	-2.385	96.4781	10	4.933	4.933	5.39162	117.224	117.224	60	13.6	9.32952	12.8	5.45527	2.6	0.8	28.9886	22.0615	15.942	1.74063	1.68	0.22987	1.082	0.219854	186	44.6363	0.904	0.32946	2.728	0.899675	108.373	54.8547	0.000100009	0.000199996	44.0159	62.4708	945.32	1181.58	459.76	504.288	92.76	75.7382	8.2332	12.2323
183	Mg2Ge2O6	R-3	148	trigonal	4.279	5.08224	-2.385	94.7157	10	5.3304	5.3304	5.3304	55.0318	55.0318	55.0318	13.6	9.32952	12.8	5.45527	2.6	0.8	28.9886	22.0615	15.942	1.74063	1.68	0.22987	1.082	0.219854	186	44.6363	0.904	0.32946	2.728	0.899675	108.373	54.8547	0.000100009	0.000199996	44.0159	62.4708	945.32	1181.58	459.76	504.288	92.76	75.7382	8.2332	12.2323
184	La1Cr1O3	Pm-3m	221	cubic	0.948	6.74972	-3.081	58.7731	5	3.888	3.888	3.888	90	90	90	21	19.0368	11.4	5.71314	3.6	2.33238	47.78	47.648	16.34	4.95411	1.81	0.373952	1.1784	0.123977	198.6	61.8372	1.032	0.521014	2.616	1.02461	106.516	42.6285	1.48e-07	2.38e-07	21.4159	36.6382	1391.52	1613.69	707.48	858.14	92.76	75.7382	5.4732	7.86204
185	La1Cr1O3	Pm-3m	221	cubic	1.797	6.83974	-3.081	57.9996	5	3.87087	3.87087	3.87087	90	90	90	21	19.0368	11.4	5.71314	3.6	2.33238	47.78	47.648	16.34	4.95411	1.81	0.373952	1.1784	0.123977	198.6	61.8372	1.032	0.521014	2.616	1.02461	106.516	42.6285	1.48e-07	2.38e-07	21.4159	36.6382	1391.52	1613.69	707.48	858.14	92.76	75.7382	5.4732	7.86204
186	Li4I4O12	Pna2_1	33	orthorhombic	1.604	4.12605	-1.244	292.734	20	9.422	5.861	5.301	90	90	90	16	18.6011	13.2	6.11228	2.6	1.2	36.3687	45.4036	18.164	4.13505	1.672	0.192914	1.19067	0.145425	173.2	28.5265	0.916	0.338562	2.792	0.955037	155.543	76.5846	200000000000000	400000000000000	17.1057	33.9475	468.6	590.579	200.988	180.286	901.16	1189.1	2.2852	2.94125
187	Li4I4O12	Pna2_1	33	orthorhombic	3.61	4.79496	-1.244	251.896	20	9.17072	5.61727	4.88983	90	90	90	16	18.6011	13.2	6.11228	2.6	1.2	36.3687	45.4036	18.164	4.13505	1.672	0.192914	1.19067	0.145425	173.2	28.5265	0.916	0.338562	2.792	0.955037	155.543	76.5846	200000000000000	400000000000000	17.1057	33.9475	468.6	590.579	200.988	180.286	901.16	1189.1	2.2852	2.94125
189	La4Ga4O12	Pnma	62	orthorhombic	3.909	7.35134	-2.928	231.87	20	5.52603	5.44866	7.70089	90	90	90	22.4	19.4587	12.8	5.03587	3.6	2.33238	51.3253	48.482	17.254	3.35137	1.772	0.355831	1.1424	0.194214	196	60.0799	1.018	0.514525	2.646	0.99803	101.954	47.8081	1.51e-07	2.38e-07	8.41595	11.453	1298.12	1532.61	332.062	441.064	92.76	75.7382	2.4912	2.78588
190	Cr2B2O6	R-3c	167	trigonal	1.494	4.28374	-2.589	85.9046	10	4.573	4.573	5.42863	114.91	114.91	60	10.6	6.8	13.4	3.87814	2.4	0.8	22.1611	15.0523	12.74	5.72915	1.708	0.23447	1.026	0.332	177.4	37.5105	0.812	0.256	2.804	0.788152	102.843	48.1701	200000000000	400000000000	24.2159	36.4224	1482.92	1751.36	938.68	1083.85	92.76	75.7382	14.2332	19.5319
191	Cr2B2O6	R-3c	167	trigonal	2.46	4.30108	-2.589	85.5584	10	5.37839	5.37839	5.37839	50.58	50.58	50.58	10.6	6.8	13.4	3.87814	2.4	0.8	22.1611	15.0523	12.74	5.72915	1.708	0.23447	1.026	0.332	177.4	37.5105	0.812	0.256	2.804	0.788152	102.843	48.1701	200000000000	400000000000	24.2159	36.4224	1482.92	1751.36	938.68	1083.85	92.76	75.7382	14.2332	19.5319
192	Nb4Ag4O12	Cmcm	63	orthorhombic	0.312	6.68176	-1.983	247.298	20	6.40092	6.40092	6.2283	90	90	75.7188	22.4	17.7381	12.8	4.35431	3.2	1.46969	49.7546	41.6113	14.636	3.3409	1.77	0.306985	1.13733	0.172284	191.8	51.2031	0.968	0.406664	2.768	0.830022	127.387	20.389	3.37e-08	5.95e-08	96.8159	167.898	1544.52	1959.4	829.866	1063.31	92.76	75.7382	7.7532	10.4453
193	Nb1Ag1O3	Pm-3m	221	cubic	0.804	6.65322	-1.989	62.0897	5	3.9598	3.9598	3.9598	90	90	90	22.4	17.7381	12.8	4.35431	3.2	1.46969	49.7546	41.6113	14.636	3.3409	1.77	0.306985	1.13733	0.172284	191.8	51.2031	0.968	0.406664	2.768	0.830022	127.387	20.389	3.37e-08	5.95e-08	96.8159	167.898	1544.52	1959.4	829.866	1063.31	92.76	75.7382	7.7532	10.4453
194	Nb1Ag1O3	Pm-3m	221	cubic	1.507	6.59376	-1.989	62.6497	5	3.97167	3.97167	3.97167	90	90	90	22.4	17.7381	12.8	4.35431	3.2	1.46969	49.7546	41.6113	14.636	3.3409	1.77	0.306985	1.13733	0.172284	191.8	51.2031	0.968	0.406664	2.768	0.830022	127.387	20.389	3.37e-08	5.95e-08	96.8159	167.898	1544.52	1959.4	829.866	1063.31	92.76	75.7382	7.7532	10.4453
195	Gd4Al4O12	Pnma	62	orthorhombic	4.271	7.43046	-3.568	207.592	20	5.3049	7.4485	5.2537	90	90	90	20.2	21.9854	14.2	2.4	3.4	2.33238	46.4459	55.5651	16.396	3.34588	1.748	0.320899	1.106	0.227099	190.8	52.8068	0.996	0.473016	2.628	1.0025	92.938	60.2983	2.67e-07	5.21e-07	49.2159	92.9892	1317.12	1520.34	536.574	624.987	92.76	75.7382	4.2732	4.96662
196	Gd4Al4O12	Pnma	62	orthorhombic	5.42	7.64619	-3.568	201.735	20	5.24707	7.37956	5.20996	90	90	90	20.2	21.9854	14.2	2.4	3.4	2.33238	46.4459	55.5651	16.396	3.34588	1.748	0.320899	1.106	0.227099	190.8	52.8068	0.996	0.473016	2.628	1.0025	92.938	60.2983	2.67e-07	5.21e-07	49.2159	92.9892	1317.12	1520.34	536.574	624.987	92.76	75.7382	4.2732	4.96662
199	Cs2I2O6	Pmn2_1	31	orthorhombic	2.49	4.99954	-1.24	204.47	10	6.613	6.613	4.676	90	90.8	90	26.4	22.5442	13.2	6.11228	3.4	1.74356	61.5616	55.8344	29.748	20.8489	1.994	0.739773	1.37267	0.218728	200.4	76.7062	1.132	0.683473	2.754	1.02742	152.717	80.2442	200000000000000	400000000000000	7.30575	14.3481	334.4	336.346	170.568	144.327	644.16	696.218	2.1032	2.91946
200	Cs2I2O6	Pm	6	monoclinic	2.409	5.67626	-1.24	180.093	10	6.33341	6.36012	4.47091	90	90.1889	90	26.4	22.5442	13.2	6.11228	3.4	1.74356	61.5616	55.8344	29.748	20.8489	1.994	0.739773	1.37267	0.218728	200.4	76.7062	1.132	0.683473	2.754	1.02742	152.717	80.2442	200000000000000	400000000000000	7.30575	14.3481	334.4	336.346	170.568	144.327	644.16	696.218	2.1032	2.91946
201	Ni2C2O6	R-3c	167	trigonal	2.733	4.35769	-1.554	90.4652	10	4.6117	4.6117	5.58692	90	114.376	60	11.6	8.2365	14.4	2.33238	2.4	0.8	23.7405	17.5446	12.792	5.60972	1.646	0.176363	0.964	0.388309	173.4	34.9033	0.768	0.205465	2.958	0.623038	131.248	12.3462	2.01e-06	3.99e-06	46.2159	58.654	1551.32	1823.84	1138.48	1480.16	92.76	75.7382	26.9732	45.4911
202	Ni2C2O6	R-3c	167	trigonal	3.627	4.65999	-1.554	84.5966	10	5.3816	5.3816	5.3816	50.1603	50.1603	50.1603	11.6	8.2365	14.4	2.33238	2.4	0.8	23.7405	17.5446	12.792	5.60972	1.646	0.176363	0.964	0.388309	173.4	34.9033	0.768	0.205465	2.958	0.623038	131.248	12.3462	2.01e-06	3.99e-06	46.2159	58.654	1551.32	1823.84	1138.48	1480.16	92.76	75.7382	26.9732	45.4911
203	H4I4O12	P2_12_12_1	19	orthorhombic	2.52	4.64121	-0.746	251.75	20	5.5402	5.8746	7.7351	90	90	90	15.6	18.8955	13.2	6.11228	2.4	1.35647	35.1821	46.2273	17.844	4.56074	1.5096	0.307637	1.01067	0.50536	154.8	27.2059	0.72	0.343162	3.036	0.515736	158.17	73.4089	200000000000000	400000000000000	0.141848	0.16474	149.656	156.237	113.052	137.808	263.16	281.882	1.7968	2.98444
205	Ba3Mn3O9	R-3m	166	trigonal	0.256	6.16975	-2.378	193.995	15	5.663	5.663	7.71233	111.539	68.4607	120	21	18.6976	11.4	5.8515	3.2	1.6	48.0526	47.1159	19.518	10.0951	1.858	0.459408	1.18367	0.2821	199.6	63.4558	1.054	0.56248	2.552	1.10742	87.3764	65.794	3.56e-07	5.58e-07	5.17595	7.08364	949.52	1054.18	536.68	612.575	92.76	75.7382	4.3732	5.34347
206	Ba3Mn3O9	R-3m	166	trigonal	1.15	6.25357	-2.378	191.394	15	7.71374	7.71374	7.71374	42.724	42.724	42.724	21	18.6976	11.4	5.8515	3.2	1.6	48.0526	47.1159	19.518	10.0951	1.858	0.459408	1.18367	0.2821	199.6	63.4558	1.054	0.56248	2.552	1.10742	87.3764	65.794	3.56e-07	5.58e-07	5.17595	7.08364	949.52	1054.18	536.68	612.575	92.76	75.7382	4.3732	5.34347
208	Mn2Ge2O6	R-3	148	trigonal	2.142	5.65621	-2.024	103.091	10	5.52581	5.52581	5.52581	54.1765	54.1765	54.1765	16.2	10.284	13.8	3.48712	2.8	0.979796	35.1152	24.072	14.612	3.90782	1.744	0.274998	1.03967	0.272581	184.8	42.9204	0.882	0.297752	2.776	0.826138	108.373	54.8547	0.000100288	0.000199857	13.5759	23.4065	1139.52	1307.37	578.96	649.29	92.76	75.7382	9.1332	12.398
209	Mn2Ge2O6	R-3	148	trigonal	1.205	5.62284	-2.024	103.703	10	5.0102	5.0102	5.57884	116.682	116.682	60	16.2	10.284	13.8	3.48712	2.8	0.979796	35.1152	24.072	14.612	3.90782	1.744	0.274998	1.03967	0.272581	184.8	42.9204	0.882	0.297752	2.776	0.826138	108.373	54.8547	0.000100288	0.000199857	13.5759	23.4065	1139.52	1307.37	578.96	649.29	92.76	75.7382	9.1332	12.398
212	Cs1Br1O3	R3m	160	trigonal	3.566	4.30345	-0.951	100.636	5	4.6525	4.6525	4.6525	88.749	88.749	88.749	22.8	19.1979	13.2	6.11228	3.2	1.6	52.1615	47.3547	28.56	21.2107	1.968	0.742089	1.2945	0.296329	196.8	76.875	1.094	0.67497	2.814	1.02893	158.594	90.8376	2e+17	4e+17	7.23995	14.3801	309.32	330.87	146.358	112.705	597.56	690.732	1.7112	2.16864
213	Cs1Br1O3	R3m	160	trigonal	3.667	4.9625	-0.951	87.2708	5	4.43607	4.43607	4.43607	89.197	89.197	89.1971	22.8	19.1979	13.2	6.11228	3.2	1.6	52.1615	47.3547	28.56	21.2107	1.968	0.742089	1.2945	0.296329	196.8	76.875	1.094	0.67497	2.814	1.02893	158.594	90.8376	2e+17	4e+17	7.23995	14.3801	309.32	330.87	146.358	112.705	597.56	690.732	1.7112	2.16864
214	In2B2O6	R-3c	167	trigonal	2.397	5.5654	-2.3	103.61	10	4.8217	4.8217	5.85072	114.334	90	60	15.6	16.7404	14.8	1.46969	2.6	1.2	34.7254	40.0967	14.446	5.06604	1.682	0.198434	1.026	0.332	177	36.7913	0.836	0.302099	2.828	0.75404	95.7634	55.3772	200000000000	400000000000	21.8159	31.8538	1363.12	1665.71	588.63	892.084	92.76	75.7382	10.7852	19.6427
215	In2B2O6	R-3c	167	trigonal	3.294	5.62222	-2.3	102.563	10	5.75787	5.75787	5.75787	49.8386	49.8386	49.8386	15.6	16.7404	14.8	1.46969	2.6	1.2	34.7254	40.0967	14.446	5.06604	1.682	0.198434	1.026	0.332	177	36.7913	0.836	0.302099	2.828	0.75404	95.7634	55.3772	200000000000	400000000000	21.8159	31.8538	1363.12	1665.71	588.63	892.084	92.76	75.7382	10.7852	19.6427
216	Li8Bi8O24	Pccn	56	orthorhombic	0.783	7.82182	-1.482	448.232	40	8.83288	4.76551	10.6486	90	90	90	22	30.5614	12.8	5.9127	2.8	1.6	52.7839	78.177	17.282	2.62327	1.69	0.222711	1.143	0.149519	188.4	51.7131	0.944	0.377656	2.664	1.0057	114.697	33.6718	2.79e-07	5.12e-07	18.6159	33.3354	744.52	804.444	232.498	219.517	737.36	1244.26	2.9132	4.1358
222	Gd2B2O6	P6_3/mmc	194	hexagonal	2.499	5.004	-3.222	143.395	10	5.03383	5.03383	6.53387	90	90	119.992	18.6	22.7297	14.2	2.4	3.2	2.4	43.2118	57.0545	15.274	5.5302	1.764	0.327023	1.053	0.329387	184.2	50.1135	0.916	0.458589	2.714	0.927094	89.9834	63.0334	200000000000	400000000000	7.61595	10.5829	1598.72	1859.91	819.68	967.436	92.76	75.7382	12.1332	19.3084
223	Ho4Ni4O12	P2_1/c	14	monoclinic	0.56	8.87575	-2.403	203.268	20	5.10003	5.43561	7.33245	90	90.1251	90	23.8	22.9469	14.2	2.4	3.6	2.33238	54.3244	57.722	15.482	4.47801	1.766	0.318848	1.1122	0.204517	194.6	56.2907	0.976	0.455833	2.694	0.939353	106.893	54.6491	1.77e-07	3.2e-07	21.4159	35.3378	1289.92	1470.62	725.28	821.169	92.76	75.7382	6.9732	8.26874
227	Ba6Mn6O18	P6_3cm	185	hexagonal	1.771	6.01954	-2.38	397.672	30	9.71032	9.7102	4.87092	90.0006	89.9984	120.018	21	18.6976	11.4	5.8515	3.2	1.6	48.0526	47.1159	19.518	10.0951	1.858	0.459408	1.18367	0.2821	199.6	63.4558	1.054	0.56248	2.552	1.10742	87.3764	65.794	3.56e-07	5.58e-07	5.17595	7.08364	949.52	1054.18	536.68	612.575	92.76	75.7382	4.3732	5.34347
228	Li2Nb2O6	R-3c	167	trigonal	1.794	4.77344	-2.702	102.862	10	5.1378	5.1378	5.38935	118.468	118.468	60	13.6	13.8362	10.8	6.49307	2.6	1.2	29.5691	31.8624	15.186	2.75119	1.712	0.261258	1.1	0.197585	183.6	43.4401	0.956	0.395656	2.578	1.07321	114.188	34.0442	4.94e-08	6.31e-08	27.8159	35.4185	1380.52	1911.74	673.618	1049.62	737.36	1244.26	6.0932	10.4092
229	Li2Nb2O6	R-3c	167	trigonal	2.579	4.69228	-2.702	104.641	10	5.41899	5.41899	5.41899	56.9628	56.9628	56.9628	13.6	13.8362	10.8	6.49307	2.6	1.2	29.5691	31.8624	15.186	2.75119	1.712	0.261258	1.1	0.197585	183.6	43.4401	0.956	0.395656	2.578	1.07321	114.188	34.0442	4.94e-08	6.31e-08	27.8159	35.4185	1380.52	1911.74	673.618	1049.62	737.36	1244.26	6.0932	10.4092
232	Er4Ni4O12	P2_1/c	14	monoclinic	0.573	9.01301	-2.423	201.889	20	5.08031	5.44172	7.30276	90	90.1425	90	24	23.3238	14.4	2.33238	3.6	2.33238	54.7901	58.6151	15.426	4.43849	1.764	0.315506	1.11	0.205329	193.8	55.0433	0.972	0.448705	2.696	0.936239	106.893	54.6491	1.86e-07	3.38e-07	21.2159	35.3707	1319.52	1505.67	738.88	838.15	92.76	75.7382	7.5532	9.01935
234	K1I1O3	R3m	160	trigonal	2.422	3.86524	-1.225	91.9366	5	4.51374	4.51374	4.51374	90.7834	89.2166	90.7834	19.2	17.4287	13.2	6.11228	3	1.26491	42.8002	42.9932	24.748	11.0797	1.858	0.480267	1.31467	0.102796	185.4	48.537	1.056	0.548219	2.76	1.01595	153.293	79.4793	200000000000000	400000000000000	20.1057	39.9475	352	368.545	177.556	151.185	701.16	803.252	2.1512	2.92082
235	K1I1O3	R3m	160	trigonal	1.915	4.48677	-1.225	79.2011	5	4.29455	4.29455	4.29454	89.6797	89.6797	89.6797	19.2	17.4287	13.2	6.11228	3	1.26491	42.8002	42.9932	24.748	11.0797	1.858	0.480267	1.31467	0.102796	185.4	48.537	1.056	0.548219	2.76	1.01595	153.293	79.4793	200000000000000	400000000000000	20.1057	39.9475	352	368.545	177.556	151.185	701.16	803.252	2.1512	2.92082
242	La1Al1O3	Pm-3m	221	cubic	2.903	6.4152	-3.554	55.363	5	3.8113	3.8113	3.8113	90	90	90	18.8	19.1979	12.8	5.03587	3.4	2.33238	42.777	48.252	16.894	3.95941	1.766	0.354378	1.1254	0.227764	194.6	59.3013	1.02	0.515364	2.606	1.03409	102.008	47.7393	1.28e-07	2.44e-07	49.6159	92.8281	1361.12	1585.34	458.174	500.801	92.76	75.7382	3.5132	4.27469
243	La1Al1O3	Pm-3m	221	cubic	3.788	6.685	-3.554	53.1286	5	3.75932	3.75932	3.75932	90	90	90	18.8	19.1979	12.8	5.03587	3.4	2.33238	42.777	48.252	16.894	3.95941	1.766	0.354378	1.1254	0.227764	194.6	59.3013	1.02	0.515364	2.606	1.03409	102.008	47.7393	1.28e-07	2.44e-07	49.6159	92.8281	1361.12	1585.34	458.174	500.801	92.76	75.7382	3.5132	4.27469
244	Al1Bi1O3	Pm-3m	221	cubic	1.294	9.13014	-2.263	51.6451	5	3.724	3.724	3.724	90	90	90	24	29.5635	15.2	1.16619	3	1.54919	56.792	76.213	16.678	3.67278	1.694	0.225175	1.098	0.228749	191	53.1413	0.932	0.366955	2.79	0.806573	111.123	39.7305	2.65e-07	5.17e-07	48.6159	93.2432	979.92	1130.75	328.454	357.026	92.76	75.7382	4.4532	5.18253
245	Al1Bi1O3	Pm-3m	221	cubic	1.953	9.05847	-2.263	52.0537	5	3.7338	3.7338	3.7338	90	90	90	24	29.5635	15.2	1.16619	3	1.54919	56.792	76.213	16.678	3.67278	1.694	0.225175	1.098	0.228749	191	53.1413	0.932	0.366955	2.79	0.806573	111.123	39.7305	2.65e-07	5.17e-07	48.6159	93.2432	979.92	1130.75	328.454	357.026	92.76	75.7382	4.4532	5.18253
246	Ga1Bi1O3	Pm-3m	221	cubic	0.92	9.76282	-1.573	55.568	5	3.816	3.816	3.816	90	90	90	27.6	29.0971	15.2	1.16619	3.2	1.6	65.3403	74.7733	17.038	3.03307	1.7	0.229347	1.115	0.197737	192.4	54.1021	0.93	0.365294	2.83	0.75004	111.068	39.8255	2.88e-07	5.09e-07	7.41595	11.2252	916.92	1032.55	202.342	196.175	92.76	75.7382	3.4312	4.27411
247	Ga1Bi1O3	Pm-3m	221	cubic	1.603	9.6289	-1.573	56.3409	5	3.83361	3.83361	3.83361	90	90	90	27.6	29.0971	15.2	1.16619	3.2	1.6	65.3403	74.7733	17.038	3.03307	1.7	0.229347	1.115	0.197737	192.4	54.1021	0.93	0.365294	2.83	0.75004	111.068	39.8255	2.88e-07	5.09e-07	7.41595	11.2252	916.92	1032.55	202.342	196.175	92.76	75.7382	3.4312	4.27411
248	Co1Bi1O3	P4mm	99	tetragonal	0.255	8.31263	-1.032	63.1068	5	3.7127	3.7127	4.57822	90	90	90	26.8	29.0475	14.4	2.72764	3.2	1.6	63.1824	74.7714	16.012	4.91514	1.726	0.253267	1.11667	0.194751	194	55.3534	0.92	0.357547	2.844	0.731289	115.545	32.2998	2.72e-07	5.15e-07	21.6159	39.3135	1061.52	1265.29	495.36	663.972	92.76	75.7382	5.5532	6.74103
251	Cd4Ge4O12	Pnma	62	orthorhombic	0.532	7.60288	-1.584	203.6	20	5.2114	5.2608	7.4263	90	90	90	20.8	16.473	14.8	1.6	3	1.26491	46.6098	39.5433	15.742	1.99163	1.77	0.306985	1.128	0.190725	185.6	44.0572	0.904	0.32946	2.804	0.785483	108.373	54.8547	0.000100014	0.000199993	31.4159	40.1851	880.72	1165.7	394.004	458.999	92.76	75.7382	7.7532	12.2517
252	Cd4Ge4O12	Pnma	62	orthorhombic	1.473	7.55886	-1.584	204.786	20	5.23083	5.26408	7.43716	90	90	90	20.8	16.473	14.8	1.6	3	1.26491	46.6098	39.5433	15.742	1.99163	1.77	0.306985	1.128	0.190725	185.6	44.0572	0.904	0.32946	2.804	0.785483	108.373	54.8547	0.000100014	0.000199993	31.4159	40.1851	880.72	1165.7	394.004	458.999	92.76	75.7382	7.7532	12.2517
253	Cr4Bi4O12	Pnma	62	orthorhombic	1.568	8.8259	-1.959	232.527	20	5.56067	7.73619	5.40529	90	90	90	26.2	29.0682	13.8	3.91918	3.2	1.6	61.7949	74.9016	16.124	4.70278	1.738	0.267013	1.151	0.136836	195	56.2139	0.944	0.377656	2.8	0.792061	115.63	32.1634	2.85e-07	5.1e-07	20.4159	36.9214	1010.32	1180.03	577.76	823.255	92.76	75.7382	6.4132	8.16777
254	Cr4Bi4O12	Pnma	62	orthorhombic	0.78	8.78729	-1.959	233.549	20	5.54568	7.7577	5.42862	90	90	90	26.2	29.0682	13.8	3.91918	3.2	1.6	61.7949	74.9016	16.124	4.70278	1.738	0.267013	1.151	0.136836	195	56.2139	0.944	0.377656	2.8	0.792061	115.63	32.1634	2.85e-07	5.1e-07	20.4159	36.9214	1010.32	1180.03	577.76	823.255	92.76	75.7382	6.4132	8.16777
255	Cr4Bi4O12	C2/c	15	monoclinic	1.108	8.78537	-1.947	233.599	20	5.45184	5.45184	9.58369	74.2717	105.728	120.309	26.2	29.0682	13.8	3.91918	3.2	1.6	61.7949	74.9016	16.124	4.70278	1.738	0.267013	1.151	0.136836	195	56.2139	0.944	0.377656	2.8	0.792061	115.63	32.1634	2.85e-07	5.1e-07	20.4159	36.9214	1010.32	1180.03	577.76	823.255	92.76	75.7382	6.4132	8.16777
256	Cr4Bi4O12	C2/c	15	monoclinic	0.651	8.71175	-1.947	235.574	20	5.46783	5.46783	9.585	105.997	105.997	60.1352	26.2	29.0682	13.8	3.91918	3.2	1.6	61.7949	74.9016	16.124	4.70278	1.738	0.267013	1.151	0.136836	195	56.2139	0.944	0.377656	2.8	0.792061	115.63	32.1634	2.85e-07	5.1e-07	20.4159	36.9214	1010.32	1180.03	577.76	823.255	92.76	75.7382	6.4132	8.16777
257	Mg2Ge2O6	Cmcm	63	orthorhombic	1.644	4.93707	-2.246	97.5007	10	2.8738	4.99963	7.0849	90	90	73.2976	13.6	9.32952	12.8	5.45527	2.6	0.8	28.9886	22.0615	15.942	1.74063	1.68	0.22987	1.082	0.219854	186	44.6363	0.904	0.32946	2.728	0.899675	108.373	54.8547	0.000100009	0.000199996	44.0159	62.4708	945.32	1181.58	459.76	504.288	92.76	75.7382	8.2332	12.2323
258	Mg2Ge2O6	Cmcm	63	orthorhombic	3.238	5.394	-2.246	89.2413	10	4.83921	4.83921	6.879	90	90	33.6403	13.6	9.32952	12.8	5.45527	2.6	0.8	28.9886	22.0615	15.942	1.74063	1.68	0.22987	1.082	0.219854	186	44.6363	0.904	0.32946	2.728	0.899675	108.373	54.8547	0.000100009	0.000199996	44.0159	62.4708	945.32	1181.58	459.76	504.288	92.76	75.7382	8.2332	12.2323
268	Dy4Ni4O12	P2_1/c	14	monoclinic	0.546	8.72103	-2.396	205.023	20	5.13239	5.42961	7.35724	90	90.0905	90	23.6	22.5708	14	2.52982	3.6	2.33238	53.8383	56.7913	15.536	4.51842	1.768	0.322205	1.1302	0.201396	194.2	55.6647	0.978	0.459408	2.692	0.942473	106.893	54.6491	2e-07	3.64e-07	20.4159	35.547	1259.32	1436.05	714.48	808.082	92.76	75.7382	5.7932	7.09073
270	Dy4Mn4O12	Pnma	62	orthorhombic	0.395	7.92707	-2.962	222.411	20	5.22526	5.7622	7.38687	90	90	90	23	22.4856	13.4	3.55528	3.6	2.33238	53.0872	56.747	15.688	4.21769	1.784	0.333623	1.11187	0.237091	195.2	56.5169	1.002	0.47178	2.618	1.01213	84.5856	69.0639	4.73e-07	6.02e-07	3.77595	4.7022	1088.92	1233.6	672.68	758.456	92.76	75.7382	4.9932	5.88112
271	Ho4Mn4O12	Pnma	62	orthorhombic	0.408	8.07072	-2.968	220.453	20	5.20223	5.75279	7.36627	90	90	90	23.2	22.8683	13.6	3.49857	3.6	2.33238	53.5733	57.6847	15.634	4.17634	1.782	0.330478	1.09387	0.238368	195.6	57.1265	1	0.468402	2.62	1.00938	84.5856	69.0639	4.51e-07	5.87e-07	4.77595	6.36857	1119.52	1277.76	683.48	772.969	92.76	75.7382	6.1732	7.38709
272	Er4Mn4O12	Pnma	62	orthorhombic	0.413	8.20632	-2.973	218.695	20	5.18682	5.74636	7.33743	90	90	90	23.4	23.2517	13.8	3.48712	3.6	2.33238	54.039	58.5843	15.578	4.136	1.78	0.327353	1.09167	0.238896	194.8	55.9121	0.996	0.461675	2.622	1.00663	84.5856	69.0639	4.6e-07	5.92e-07	4.57595	6.01906	1149.12	1321.78	697.08	791.703	92.76	75.7382	6.7532	8.27489
273	Lu4Mn4O12	Pnma	62	orthorhombic	0.411	8.64137	-2.984	213.609	20	5.1373	5.70726	7.28547	90	90	90	24	24.4049	14.4	3.72022	3.6	2.33238	55.5806	61.5687	15.442	4.04927	1.77	0.312026	1.08587	0.240668	191.6	51.2664	0.99	0.451664	2.628	0.998427	91.1476	61.9028	4.04e-07	5.65e-07	4.77595	6.36857	1255.92	1489.36	721.68	826.787	92.76	75.7382	7.1732	8.95672
275	Fe4Bi4O12	P1	1	triclinic	1.285	8.86488	-1.354	234.388	20	5.49398	7.76236	5.49612	89.9975	90.1521	90.0097	26.6	29.0489	14.2	3.1241	3.2	1.6	62.5647	74.8167	16.096	4.75577	1.734	0.262267	1.1335	0.16533	194.8	56.0371	0.932	0.366955	2.834	0.744623	105.684	49.5104	2.8e-07	5.11e-07	17.6159	31.3445	1048.32	1243.07	503.96	680.474	92.76	75.7382	5.0732	6.01184
276	Fe4Bi4O12	Pnma	62	orthorhombic	1.161	8.8734	-1.554	234.163	20	5.42925	5.56576	7.74916	90	90	90	26.6	29.0489	14.2	3.1241	3.2	1.6	62.5647	74.8167	16.096	4.75577	1.734	0.262267	1.1335	0.16533	194.8	56.0371	0.932	0.366955	2.834	0.744623	105.684	49.5104	2.8e-07	5.11e-07	17.6159	31.3445	1048.32	1243.07	503.96	680.474	92.76	75.7382	5.0732	6.01184
279	La2Al2O6	R-3c	167	trigonal	3.131	6.51816	-3.558	108.977	10	5.35691	5.35691	5.35691	119.887	60.1127	119.887	18.8	19.1979	12.8	5.03587	3.4	2.33238	42.777	48.252	16.894	3.95941	1.766	0.354378	1.1254	0.227764	194.6	59.3013	1.02	0.515364	2.606	1.03409	102.008	47.7393	1.28e-07	2.44e-07	49.6159	92.8281	1361.12	1585.34	458.174	500.801	92.76	75.7382	3.5132	4.27469
280	La2Al2O6	R-3c	167	trigonal	3.91	6.68689	-3.558	106.227	10	5.31285	5.31285	5.31285	60.0782	60.0782	60.0782	18.8	19.1979	12.8	5.03587	3.4	2.33238	42.777	48.252	16.894	3.95941	1.766	0.354378	1.1254	0.227764	194.6	59.3013	1.02	0.515364	2.606	1.03409	102.008	47.7393	1.28e-07	2.44e-07	49.6159	92.8281	1361.12	1585.34	458.174	500.801	92.76	75.7382	3.5132	4.27469
281	Nd4Co4O12	Pnma	62	orthorhombic	1.324	7.9096	-2.448	210.925	20	5.26982	7.49969	5.3369	90	90	90	22.2	20.282	12.6	4.27083	3.6	2.33238	50.2347	49.8582	15.868	4.7661	1.79	0.352931	1.16497	0.19842	197	60.1332	0.996	0.488983	2.668	0.974031	97.3602	57.1094	1.41e-07	2.52e-07	23.4159	38.8522	1368.72	1566.82	645.88	739.086	92.76	75.7382	4.7932	6.29482
282	Ce2Al2O6	I4/mcm	140	tetragonal	2.622	6.6474	-3.475	107.463	10	5.3278	5.3278	5.34092	119.919	119.919	90	19	19.5959	13	4.64758	3.4	2.33238	43.0191	48.7344	16.554	3.52166	1.764	0.350634	1.107	0.226971	192.6	55.8484	1	0.48	2.61	1.02828	105.482	43.9734	1.53e-07	2.93e-07	49.2159	92.9892	1339.12	1552.56	433.174	465.36	92.76	75.7382	3.3732	4.19513
283	Ce2Al2O6	I4/mcm	140	tetragonal	3.163	6.72555	-3.475	106.214	10	5.32006	5.32006	5.32006	120.159	120.159	89.7248	19	19.5959	13	4.64758	3.4	2.33238	43.0191	48.7344	16.554	3.52166	1.764	0.350634	1.107	0.226971	192.6	55.8484	1	0.48	2.61	1.02828	105.482	43.9734	1.53e-07	2.93e-07	49.2159	92.9892	1339.12	1552.56	433.174	465.36	92.76	75.7382	3.3732	4.19513
284	Fe1Bi1O3	Cm	8	monoclinic	0.639	7.55989	-1.534	68.7121	5	4.05891	4.05891	4.1739	91.4192	88.5808	90.9992	26.6	29.0489	14.2	3.1241	3.2	1.6	62.5647	74.8167	16.096	4.75577	1.734	0.262267	1.1335	0.16533	194.8	56.0371	0.932	0.366955	2.834	0.744623	105.684	49.5104	2.8e-07	5.11e-07	17.6159	31.3445	1048.32	1243.07	503.96	680.474	92.76	75.7382	5.0732	6.01184
285	Fe1Bi1O3	Cm	8	monoclinic	1.289	8.31169	-1.534	62.497	5	3.9406	3.9406	4.02703	88.7612	91.2388	90.8687	26.6	29.0489	14.2	3.1241	3.2	1.6	62.5647	74.8167	16.096	4.75577	1.734	0.262267	1.1335	0.16533	194.8	56.0371	0.932	0.366955	2.834	0.744623	105.684	49.5104	2.8e-07	5.11e-07	17.6159	31.3445	1048.32	1243.07	503.96	680.474	92.76	75.7382	5.0732	6.01184
286	Gd4Mn4O12	Pnma	62	orthorhombic	0.236	7.64645	-2.946	226.013	20	5.76466	7.45721	5.25755	90	90	90	22.6	21.7219	13	3.79473	3.6	2.33238	52.0372	54.7253	15.866	4.37016	1.79	0.343162	1.10067	0.237245	194.8	55.9121	1.006	0.478565	2.616	1.0149	84.5856	69.0639	5.5e-07	6.75e-07	3.77595	4.7022	1225.52	1440.42	653.68	733.772	92.76	75.7382	4.7732	5.66517
287	Li6Nb6O18	R-3c	167	trigonal	1.607	4.60529	-2.705	319.854	30	5.185	5.185	13.738	90	90	120	13.6	13.8362	10.8	6.49307	2.6	1.2	29.5691	31.8624	15.186	2.75119	1.712	0.261258	1.1	0.197585	183.6	43.4401	0.956	0.395656	2.578	1.07321	114.188	34.0442	4.94e-08	6.31e-08	27.8159	35.4185	1380.52	1911.74	673.618	1049.62	737.36	1244.26	6.0932	10.4092
288	Li2Nb2O6	R-3c	167	trigonal	2.581	4.67701	-2.705	104.983	10	5.42714	5.42714	5.42714	56.9133	56.9133	56.9133	13.6	13.8362	10.8	6.49307	2.6	1.2	29.5691	31.8624	15.186	2.75119	1.712	0.261258	1.1	0.197585	183.6	43.4401	0.956	0.395656	2.578	1.07321	114.188	34.0442	4.94e-08	6.31e-08	27.8159	35.4185	1380.52	1911.74	673.618	1049.62	737.36	1244.26	6.0932	10.4092
289	Al2Bi2O6	R3c	161	trigonal	2.351	8.44125	-2.329	111.72	10	5.37546	5.37546	5.4372	90	119.625	60	24	29.5635	15.2	1.16619	3	1.54919	56.792	76.213	16.678	3.67278	1.694	0.225175	1.098	0.228749	191	53.1413	0.932	0.366955	2.79	0.806573	111.123	39.7305	2.65e-07	5.17e-07	48.6159	93.2432	979.92	1130.75	328.454	357.026	92.76	75.7382	4.4532	5.18253
290	Al2Bi2O6	R3c	161	trigonal	3.039	8.81447	-2.329	106.989	10	5.32545	5.32545	5.32545	60.08	60.08	60.08	24	29.5635	15.2	1.16619	3	1.54919	56.792	76.213	16.678	3.67278	1.694	0.225175	1.098	0.228749	191	53.1413	0.932	0.366955	2.79	0.806573	111.123	39.7305	2.65e-07	5.17e-07	48.6159	93.2432	979.92	1130.75	328.454	357.026	92.76	75.7382	4.4532	5.18253
291	Ga4Bi4O12	Pcca	54	orthorhombic	1.34	7.85419	-1.794	276.286	20	5.4162	5.1335	9.9369	90	90	90	27.6	29.0971	15.2	1.16619	3.2	1.6	65.3403	74.7733	17.038	3.03307	1.7	0.229347	1.115	0.197737	192.4	54.1021	0.93	0.365294	2.83	0.75004	111.068	39.8255	2.88e-07	5.09e-07	7.41595	11.2252	916.92	1032.55	202.342	196.175	92.76	75.7382	3.4312	4.27411
292	Ga4Bi4O12	Pcca	54	orthorhombic	2.038	8.16001	-1.794	265.932	20	5.36668	5.15288	9.61643	90	90	90	27.6	29.0971	15.2	1.16619	3.2	1.6	65.3403	74.7733	17.038	3.03307	1.7	0.229347	1.115	0.197737	192.4	54.1021	0.93	0.365294	2.83	0.75004	111.068	39.8255	2.88e-07	5.09e-07	7.41595	11.2252	916.92	1032.55	202.342	196.175	92.76	75.7382	3.4312	4.27411
293	In4Bi4O12	Pna2_1	33	orthorhombic	1.829	8.82795	-1.608	279.74	20	5.95463	5.60182	8.38631	90	90	90	31.2	30.3803	15.2	1.16619	3.4	1.74356	74.3593	77.4305	17.83	1.84705	1.712	0.239282	1.151	0.136836	194.6	55.8627	0.968	0.402512	2.824	0.758251	108.55	44.2925	2.76e-07	5.13e-07	18.0159	32.1407	890.52	993.265	227.71	214.852	92.76	75.7382	2.9652	4.1382
294	In4Bi4O12	Pna2_1	33	orthorhombic	2.752	9.12904	-1.608	270.514	20	6.0076	5.56605	8.08987	90	90	90	31.2	30.3803	15.2	1.16619	3.4	1.74356	74.3593	77.4305	17.83	1.84705	1.712	0.239282	1.151	0.136836	194.6	55.8627	0.968	0.402512	2.824	0.758251	108.55	44.2925	2.76e-07	5.13e-07	18.0159	32.1407	890.52	993.265	227.71	214.852	92.76	75.7382	2.9652	4.1382
295	In4Bi4O12	Pnma	62	orthorhombic	1.713	8.82782	-1.619	279.744	20	5.95462	8.3864	5.60185	90	90	90	31.2	30.3803	15.2	1.16619	3.4	1.74356	74.3593	77.4305	17.83	1.84705	1.712	0.239282	1.151	0.136836	194.6	55.8627	0.968	0.402512	2.824	0.758251	108.55	44.2925	2.76e-07	5.13e-07	18.0159	32.1407	890.52	993.265	227.71	214.852	92.76	75.7382	2.9652	4.1382
296	In4Bi4O12	Pnma	62	orthorhombic	2.759	9.12422	-1.619	270.657	20	6.00724	8.09443	5.56618	90	90	90	31.2	30.3803	15.2	1.16619	3.4	1.74356	74.3593	77.4305	17.83	1.84705	1.712	0.239282	1.151	0.136836	194.6	55.8627	0.968	0.402512	2.824	0.758251	108.55	44.2925	2.76e-07	5.13e-07	18.0159	32.1407	890.52	993.265	227.71	214.852	92.76	75.7382	2.9652	4.1382
298	La2Al2O6	R-3c	167	trigonal	3.116	6.51755	-3.558	108.987	10	5.35882	5.35882	5.35882	60.0693	119.931	119.931	18.8	19.1979	12.8	5.03587	3.4	2.33238	42.777	48.252	16.894	3.95941	1.766	0.354378	1.1254	0.227764	194.6	59.3013	1.02	0.515364	2.606	1.03409	102.008	47.7393	1.28e-07	2.44e-07	49.6159	92.8281	1361.12	1585.34	458.174	500.801	92.76	75.7382	3.5132	4.27469
299	La2Al2O6	R-3c	167	trigonal	3.914	6.68305	-3.558	106.288	10	5.31369	5.31369	5.3137	60.0824	60.0824	60.0824	18.8	19.1979	12.8	5.03587	3.4	2.33238	42.777	48.252	16.894	3.95941	1.766	0.354378	1.1254	0.227764	194.6	59.3013	1.02	0.515364	2.606	1.03409	102.008	47.7393	1.28e-07	2.44e-07	49.6159	92.8281	1361.12	1585.34	458.174	500.801	92.76	75.7382	3.5132	4.27469
301	Mg2C2O6	R-3c	167	trigonal	5.276	3.22596	-2.289	86.7998	10	5.4515	5.4515	5.4515	49.7493	49.7493	49.7493	8.4	1.95959	12.8	5.45527	2.2	0.4	16.8628	4.02903	14.274	4.6767	1.598	0.096	0.988	0.377274	175.6	39.1234	0.814	0.296081	2.836	0.837248	108.941	54.9756	2.01e-06	4e-06	60.0159	73.7434	1186.72	1632.83	977.48	1450.77	92.76	75.7382	25.2732	45.9808
302	La2Al2O6	C2/c	15	monoclinic	3.295	6.7598	-3.557	105.081	10	5.28647	5.28647	5.2976	60.1794	119.821	119.861	18.8	19.1979	12.8	5.03587	3.4	2.33238	42.777	48.252	16.894	3.95941	1.766	0.354378	1.1254	0.227764	194.6	59.3013	1.02	0.515364	2.606	1.03409	102.008	47.7393	1.28e-07	2.44e-07	49.6159	92.8281	1361.12	1585.34	458.174	500.801	92.76	75.7382	3.5132	4.27469
303	La2Al2O6	C2/c	15	monoclinic	3.909	6.70188	-3.557	105.99	10	5.30871	5.30871	5.30955	119.919	60.0812	119.936	18.8	19.1979	12.8	5.03587	3.4	2.33238	42.777	48.252	16.894	3.95941	1.766	0.354378	1.1254	0.227764	194.6	59.3013	1.02	0.515364	2.606	1.03409	102.008	47.7393	1.28e-07	2.44e-07	49.6159	92.8281	1361.12	1585.34	458.174	500.801	92.76	75.7382	3.5132	4.27469
304	La2Al2O6	I4/mcm	140	tetragonal	2.925	6.76011	-3.557	105.077	10	5.2712	5.2712	5.30981	119.76	119.76	90	18.8	19.1979	12.8	5.03587	3.4	2.33238	42.777	48.252	16.894	3.95941	1.766	0.354378	1.1254	0.227764	194.6	59.3013	1.02	0.515364	2.606	1.03409	102.008	47.7393	1.28e-07	2.44e-07	49.6159	92.8281	1361.12	1585.34	458.174	500.801	92.76	75.7382	3.5132	4.27469
305	La2Al2O6	I4/mcm	140	tetragonal	3.778	6.70716	-3.557	105.906	10	5.31242	5.31242	5.31242	120.067	120.067	89.8842	18.8	19.1979	12.8	5.03587	3.4	2.33238	42.777	48.252	16.894	3.95941	1.766	0.354378	1.1254	0.227764	194.6	59.3013	1.02	0.515364	2.606	1.03409	102.008	47.7393	1.28e-07	2.44e-07	49.6159	92.8281	1361.12	1585.34	458.174	500.801	92.76	75.7382	3.5132	4.27469
306	La2Al2O6	Imma	74	orthorhombic	3.225	6.736	-3.557	105.453	10	5.29683	5.29683	5.29683	119.765	119.765	90.4069	18.8	19.1979	12.8	5.03587	3.4	2.33238	42.777	48.252	16.894	3.95941	1.766	0.354378	1.1254	0.227764	194.6	59.3013	1.02	0.515364	2.606	1.03409	102.008	47.7393	1.28e-07	2.44e-07	49.6159	92.8281	1361.12	1585.34	458.174	500.801	92.76	75.7382	3.5132	4.27469
307	La2Al2O6	Imma	74	orthorhombic	3.778	6.70638	-3.557	105.918	10	5.31025	5.31025	5.31025	90.0376	119.994	119.963	18.8	19.1979	12.8	5.03587	3.4	2.33238	42.777	48.252	16.894	3.95941	1.766	0.354378	1.1254	0.227764	194.6	59.3013	1.02	0.515364	2.606	1.03409	102.008	47.7393	1.28e-07	2.44e-07	49.6159	92.8281	1361.12	1585.34	458.174	500.801	92.76	75.7382	3.5132	4.27469
308	La2Al2O6	Fmmm	69	orthorhombic	3.052	6.78916	-3.556	104.627	10	5.27863	5.27863	5.28924	119.802	119.802	90.2287	18.8	19.1979	12.8	5.03587	3.4	2.33238	42.777	48.252	16.894	3.95941	1.766	0.354378	1.1254	0.227764	194.6	59.3013	1.02	0.515364	2.606	1.03409	102.008	47.7393	1.28e-07	2.44e-07	49.6159	92.8281	1361.12	1585.34	458.174	500.801	92.76	75.7382	3.5132	4.27469
309	La2Al2O6	I4/mcm	140	tetragonal	3.782	6.7055	-3.556	105.932	10	5.31362	5.31434	5.30525	60.0476	60.061	59.8914	18.8	19.1979	12.8	5.03587	3.4	2.33238	42.777	48.252	16.894	3.95941	1.766	0.354378	1.1254	0.227764	194.6	59.3013	1.02	0.515364	2.606	1.03409	102.008	47.7393	1.28e-07	2.44e-07	49.6159	92.8281	1361.12	1585.34	458.174	500.801	92.76	75.7382	3.5132	4.27469
314	Li8Nb8O24	P2_1/c	14	monoclinic	3.347	4.33849	-2.724	452.698	40	9.42784	8.24513	5.82598	90	91.6024	90	13.6	13.8362	10.8	6.49307	2.6	1.2	29.5691	31.8624	15.186	2.75119	1.712	0.261258	1.1	0.197585	183.6	43.4401	0.956	0.395656	2.578	1.07321	114.188	34.0442	4.94e-08	6.31e-08	27.8159	35.4185	1380.52	1911.74	673.618	1049.62	737.36	1244.26	6.0932	10.4092
315	Nb4Cu4O12	C2/m	12	monoclinic	0.619	5.01566	-2.175	270.751	20	6.34933	6.34933	6.763	90.6948	90.6948	83.309	18.8	13.7608	12.8	4.35431	3	1.26491	40.8901	31.8673	14.004	4.27527	1.74	0.27828	1.084	0.215555	188.8	47.8598	0.94	0.382832	2.762	0.836144	126.094	20.6629	3.38e-08	5.95e-08	90.8159	155.999	1697.52	2050.7	854.434	1073.76	92.76	75.7382	8.1132	10.5913
316	Nb4Cu4O12	C2/m	12	monoclinic	1.558	5.50049	-2.175	246.886	20	6.25039	6.25039	6.41766	84.4687	95.5313	96.7892	18.8	13.7608	12.8	4.35431	3	1.26491	40.8901	31.8673	14.004	4.27527	1.74	0.27828	1.084	0.215555	188.8	47.8598	0.94	0.382832	2.762	0.836144	126.094	20.6629	3.38e-08	5.95e-08	90.8159	155.999	1697.52	2050.7	854.434	1073.76	92.76	75.7382	8.1132	10.5913
317	Li2As2O6	R-3	148	trigonal	3.371	4.54805	-1.82	94.8271	10	4.808	4.808	5.49014	115.968	115.968	60	12	10.6771	12.8	5.9127	2.4	0.8	25.9722	24.7249	15.61	2.14342	1.646	0.154609	1.068	0.247095	170	25.6437	0.884	0.300506	2.696	0.987068	112.026	35.907	8.5e-08	1.28e-07	27.0159	34.8588	554.52	613.505	341.618	404.828	1077.36	1228.49	6.2732	10.7673
318	Li2As2O6	R-3	148	trigonal	4.124	4.78235	-1.82	90.1811	10	5.30695	5.30695	5.30695	53.7251	53.7251	53.7251	12	10.6771	12.8	5.9127	2.4	0.8	25.9722	24.7249	15.61	2.14342	1.646	0.154609	1.068	0.247095	170	25.6437	0.884	0.300506	2.696	0.987068	112.026	35.907	8.5e-08	1.28e-07	27.0159	34.8588	554.52	613.505	341.618	404.828	1077.36	1228.49	6.2732	10.7673
321	Ce2Al2O6	Imma	74	orthorhombic	2.281	6.62958	-3.477	107.752	10	5.33725	5.33836	5.33836	119.766	119.993	60.0069	19	19.5959	13	4.64758	3.4	2.33238	43.0191	48.7344	16.554	3.52166	1.764	0.350634	1.107	0.226971	192.6	55.8484	1	0.48	2.61	1.02828	105.482	43.9734	1.53e-07	2.93e-07	49.2159	92.9892	1339.12	1552.56	433.174	465.36	92.76	75.7382	3.3732	4.19513
322	Ce2Al2O6	Imma	74	orthorhombic	3.021	6.74268	-3.477	105.945	10	5.31139	5.31139	5.31139	120.01	89.9919	119.999	19	19.5959	13	4.64758	3.4	2.33238	43.0191	48.7344	16.554	3.52166	1.764	0.350634	1.107	0.226971	192.6	55.8484	1	0.48	2.61	1.02828	105.482	43.9734	1.53e-07	2.93e-07	49.2159	92.9892	1339.12	1552.56	433.174	465.36	92.76	75.7382	3.3732	4.19513
323	Ce2Al2O6	R-3c	167	trigonal	3.901	6.70808	-3.473	106.491	10	5.31253	5.31253	5.31253	60.196	60.196	60.196	19	19.5959	13	4.64758	3.4	2.33238	43.0191	48.7344	16.554	3.52166	1.764	0.350634	1.107	0.226971	192.6	55.8484	1	0.48	2.61	1.02828	105.482	43.9734	1.53e-07	2.93e-07	49.2159	92.9892	1339.12	1552.56	433.174	465.36	92.76	75.7382	3.3732	4.19513
324	Ce2Al2O6	R-3c	167	trigonal	2.585	6.46957	-3.473	110.417	10	5.38405	5.38405	5.38405	119.977	60.0228	119.977	19	19.5959	13	4.64758	3.4	2.33238	43.0191	48.7344	16.554	3.52166	1.764	0.350634	1.107	0.226971	192.6	55.8484	1	0.48	2.61	1.02828	105.482	43.9734	1.53e-07	2.93e-07	49.2159	92.9892	1339.12	1552.56	433.174	465.36	92.76	75.7382	3.3732	4.19513
325	Ce2Al2O6	R-3c	167	trigonal	3.298	7.24572	-3.473	98.5893	10	5.18176	5.18176	5.18176	60.0928	60.0928	60.0928	19	19.5959	13	4.64758	3.4	2.33238	43.0191	48.7344	16.554	3.52166	1.764	0.350634	1.107	0.226971	192.6	55.8484	1	0.48	2.61	1.02828	105.482	43.9734	1.53e-07	2.93e-07	49.2159	92.9892	1339.12	1552.56	433.174	465.36	92.76	75.7382	3.3732	4.19513
326	Ce1Al1O3	Pm-3m	221	cubic	2.335	6.46901	-3.47	55.2132	5	3.80786	3.80786	3.80786	90	90	90	19	19.5959	13	4.64758	3.4	2.33238	43.0191	48.7344	16.554	3.52166	1.764	0.350634	1.107	0.226971	192.6	55.8484	1	0.48	2.61	1.02828	105.482	43.9734	1.53e-07	2.93e-07	49.2159	92.9892	1339.12	1552.56	433.174	465.36	92.76	75.7382	3.3732	4.19513
327	Ce1Al1O3	Pm-3m	221	cubic	3.196	6.73025	-3.47	53.0701	5	3.75794	3.75794	3.75794	90	90	90	19	19.5959	13	4.64758	3.4	2.33238	43.0191	48.7344	16.554	3.52166	1.764	0.350634	1.107	0.226971	192.6	55.8484	1	0.48	2.61	1.02828	105.482	43.9734	1.53e-07	2.93e-07	49.2159	92.9892	1339.12	1552.56	433.174	465.36	92.76	75.7382	3.3732	4.19513
328	Ni4Bi4O12	P-1	2	triclinic	0.667	9.35922	-1.253	224.03	20	5.27461	5.61882	7.55951	90.4167	90.0205	89.5732	27	29.0517	14.6	2.33238	3.2	1.6	63.1344	74.7742	15.996	4.94556	1.72	0.246982	1.111	0.204949	194	55.3534	0.918	0.356112	2.852	0.720844	125.078	20.5334	2.74e-07	5.14e-07	19.8159	35.7257	1058.72	1260.57	487.36	648.655	92.76	75.7382	5.7532	7.06118
329	Ca4Cr4O12	Pnma	62	orthorhombic	0.637	4.3505	-2.612	213.856	20	5.27438	5.4329	7.46309	89.9659	89.9931	89.9921	13.6	6.97424	11.2	6.01332	2.8	0.979796	28.0145	15.1903	17.102	6.00716	1.786	0.335237	1.172	0.124964	191.4	50.9886	0.992	0.453008	2.598	1.05152	97.9196	56.2522	3.22e-08	4.92e-08	58.8159	79.4222	994.32	1169.21	691.88	849.841	92.76	75.7382	5.9412	7.9604
330	Cr2Bi2O6	R3c	161	trigonal	1.879	8.77411	-1.953	116.95	10	5.44229	5.44229	5.44229	61.1578	61.1578	61.1578	26.2	29.0682	13.8	3.91918	3.2	1.6	61.7949	74.9016	16.124	4.70278	1.738	0.267013	1.151	0.136836	195	56.2139	0.944	0.377656	2.8	0.792061	115.63	32.1634	2.85e-07	5.1e-07	20.4159	36.9214	1010.32	1180.03	577.76	823.255	92.76	75.7382	6.4132	8.16777
331	Cr2Bi2O6	R3c	161	trigonal	0.893	8.98873	-1.953	114.157	10	5.43	5.43	5.43	60.37	60.37	60.37	26.2	29.0682	13.8	3.91918	3.2	1.6	61.7949	74.9016	16.124	4.70278	1.738	0.267013	1.151	0.136836	195	56.2139	0.944	0.377656	2.8	0.792061	115.63	32.1634	2.85e-07	5.1e-07	20.4159	36.9214	1010.32	1180.03	577.76	823.255	92.76	75.7382	6.4132	8.16777
332	Na4Nb4O12	Pnma	62	orthorhombic	1.102	4.56774	-2.67	238.326	20	5.569	7.764	5.512	90	90	90	15.2	12.9522	10.8	6.49307	2.8	1.16619	32.7789	30.1854	17.338	4.09524	1.802	0.346549	1.152	0.170458	191.2	50.4951	1.016	0.460678	2.568	1.08818	112.835	36.2489	4.02e-08	5.9e-08	38.8159	54.7405	1288.72	1909.29	657.054	1053.61	607.36	984.642	6.0132	10.4341
333	Na4Nb4O12	Pnma	62	orthorhombic	2.328	4.73567	-2.67	229.875	20	5.52176	7.72059	5.39217	90	90	90	15.2	12.9522	10.8	6.49307	2.8	1.16619	32.7789	30.1854	17.338	4.09524	1.802	0.346549	1.152	0.170458	191.2	50.4951	1.016	0.460678	2.568	1.08818	112.835	36.2489	4.02e-08	5.9e-08	38.8159	54.7405	1288.72	1909.29	657.054	1053.61	607.36	984.642	6.0132	10.4341
334	Na4Nb4O12	Pna2_1	33	orthorhombic	1.251	4.56409	-2.671	238.517	20	5.571	7.766	5.513	90	90	90	15.2	12.9522	10.8	6.49307	2.8	1.16619	32.7789	30.1854	17.338	4.09524	1.802	0.346549	1.152	0.170458	191.2	50.4951	1.016	0.460678	2.568	1.08818	112.835	36.2489	4.02e-08	5.9e-08	38.8159	54.7405	1288.72	1909.29	657.054	1053.61	607.36	984.642	6.0132	10.4341
335	Na4Nb4O12	Pna2_1	33	orthorhombic	2.655	4.73394	-2.671	229.959	20	5.51124	7.75434	5.38091	90	90	90	15.2	12.9522	10.8	6.49307	2.8	1.16619	32.7789	30.1854	17.338	4.09524	1.802	0.346549	1.152	0.170458	191.2	50.4951	1.016	0.460678	2.568	1.08818	112.835	36.2489	4.02e-08	5.9e-08	38.8159	54.7405	1288.72	1909.29	657.054	1053.61	607.36	984.642	6.0132	10.4341
336	Na4Nb4O12	Pmn2_1	31	orthorhombic	1.097	4.56491	-2.672	238.474	20	5.57	7.766	5.513	90	90	90	15.2	12.9522	10.8	6.49307	2.8	1.16619	32.7789	30.1854	17.338	4.09524	1.802	0.346549	1.152	0.170458	191.2	50.4951	1.016	0.460678	2.568	1.08818	112.835	36.2489	4.02e-08	5.9e-08	38.8159	54.7405	1288.72	1909.29	657.054	1053.61	607.36	984.642	6.0132	10.4341
337	Na4Nb4O12	Pmn2_1	31	orthorhombic	2.497	4.73042	-2.672	230.13	20	5.52867	7.70321	5.40357	90	90	90	15.2	12.9522	10.8	6.49307	2.8	1.16619	32.7789	30.1854	17.338	4.09524	1.802	0.346549	1.152	0.170458	191.2	50.4951	1.016	0.460678	2.568	1.08818	112.835	36.2489	4.02e-08	5.9e-08	38.8159	54.7405	1288.72	1909.29	657.054	1053.61	607.36	984.642	6.0132	10.4341
338	Na4Nb4O12	Pmc2_1	26	orthorhombic	1.4	4.56491	-2.692	238.474	20	5.57	7.766	5.513	90	90	90	15.2	12.9522	10.8	6.49307	2.8	1.16619	32.7789	30.1854	17.338	4.09524	1.802	0.346549	1.152	0.170458	191.2	50.4951	1.016	0.460678	2.568	1.08818	112.835	36.2489	4.02e-08	5.9e-08	38.8159	54.7405	1288.72	1909.29	657.054	1053.61	607.36	984.642	6.0132	10.4341
339	Na4Nb4O12	Pmc2_1	26	orthorhombic	2.476	4.72272	-2.692	230.505	20	5.53445	7.70643	5.40447	90	90	90	15.2	12.9522	10.8	6.49307	2.8	1.16619	32.7789	30.1854	17.338	4.09524	1.802	0.346549	1.152	0.170458	191.2	50.4951	1.016	0.460678	2.568	1.08818	112.835	36.2489	4.02e-08	5.9e-08	38.8159	54.7405	1288.72	1909.29	657.054	1053.61	607.36	984.642	6.0132	10.4341
342	La4In4O12	Pnma	62	orthorhombic	3.251	7.25258	-2.772	276.327	20	5.93563	8.17961	5.69146	90	90	90	26	22.1901	12.8	5.03587	3.8	2.4	60.3443	54.8428	18.046	2.25867	1.784	0.359922	1.1784	0.123977	198.2	61.5415	1.056	0.535373	2.64	1.00312	99.4356	51.1416	1.39e-07	2.4e-07	19.0159	31.8903	1271.72	1513.08	357.43	442.304	92.76	75.7382	2.0252	2.39618
343	La4In4O12	Pnma	62	orthorhombic	2.281	7.1752	-2.772	279.307	20	5.9404	8.2158	5.7229	90	90	90	26	22.1901	12.8	5.03587	3.8	2.4	60.3443	54.8428	18.046	2.25867	1.784	0.359922	1.1784	0.123977	198.2	61.5415	1.056	0.535373	2.64	1.00312	99.4356	51.1416	1.39e-07	2.4e-07	19.0159	31.8903	1271.72	1513.08	357.43	442.304	92.76	75.7382	2.0252	2.39618
358	Ho4Ga4O12	Pnma	62	orthorhombic	3.238	8.57614	-2.978	218.911	20	5.5296	7.5356	5.2536	90	90	90	24.4	23.0877	14.8	1.46969	3.6	2.33238	56.5303	58.0567	16.524	2.42172	1.746	0.308389	1.1162	0.197266	193	55.0781	0.988	0.461537	2.672	0.958319	92.8836	60.3445	1.91e-07	3.16e-07	9.01595	11.7522	1148.12	1305.92	440.262	653.967	92.76	75.7382	4.6512	6.51502
359	Ho4Ga4O12	Pnma	62	orthorhombic	4.358	8.73634	-2.978	214.897	20	5.51686	7.49103	5.19993	90	90	90	24.4	23.0877	14.8	1.46969	3.6	2.33238	56.5303	58.0567	16.524	2.42172	1.746	0.308389	1.1162	0.197266	193	55.0781	0.988	0.461537	2.672	0.958319	92.8836	60.3445	1.91e-07	3.16e-07	9.01595	11.7522	1148.12	1305.92	440.262	653.967	92.76	75.7382	4.6512	6.51502
362	Li2I2O6	P6_3	173	hexagonal	3.692	4.70331	-1.24	128.402	10	5.40824	5.40845	5.06884	90	90	119.999	16	18.6011	13.2	6.11228	2.6	1.2	36.3687	45.4036	18.164	4.13505	1.672	0.192914	1.19067	0.145425	173.2	28.5265	0.916	0.338562	2.792	0.955037	155.543	76.5846	200000000000000	400000000000000	17.1057	33.9475	468.6	590.579	200.988	180.286	901.16	1189.1	2.2852	2.94125
364	Ba2Mn2O6	P6_3/mmc	194	hexagonal	1.924	5.83802	-2.379	136.679	10	5.67785	5.67789	4.89551	90	90	120	21	18.6976	11.4	5.8515	3.2	1.6	48.0526	47.1159	19.518	10.0951	1.858	0.459408	1.18367	0.2821	199.6	63.4558	1.054	0.56248	2.552	1.10742	87.3764	65.794	3.56e-07	5.58e-07	5.17595	7.08364	949.52	1054.18	536.68	612.575	92.76	75.7382	4.3732	5.34347
365	Nd2Al2O6	R-3c	167	trigonal	4.604	6.87201	-3.511	105.945	10	5.28951	5.28951	5.28951	119.452	60.5485	119.452	19.4	20.3922	13.4	3.87814	3.4	2.33238	43.8443	50.3787	16.534	3.49832	1.758	0.339435	1.1463	0.235737	194	58.258	1.008	0.494061	2.614	1.0225	92.938	60.2983	1.34e-07	2.55e-07	50.4159	92.5258	1287.12	1477.39	478.974	532.072	92.76	75.7382	3.6932	4.40112
366	Ba2Ni2O6	P6_3mc	186	hexagonal	1.476	6.25873	-1.737	129.484	10	5.62029	5.6203	4.73333	90	90	120	21.6	18.8637	12	5.51362	3.2	1.6	48.8037	47.2494	19.366	10.2812	1.842	0.453802	1.202	0.24758	198.6	62.7681	1.03	0.554401	2.626	1.0488	109.684	49.2041	8.24e-08	1.32e-07	21.8159	35.2855	1119.92	1303.56	578.48	681.439	92.76	75.7382	5.1732	6.72574
367	Na2Nb2O6	P4/mbm	127	tetragonal	1.734	4.51825	-2.679	120.468	10	5.50691	5.50691	3.97243	90	90	90	15.2	12.9522	10.8	6.49307	2.8	1.16619	32.7789	30.1854	17.338	4.09524	1.802	0.346549	1.152	0.170458	191.2	50.4951	1.016	0.460678	2.568	1.08818	112.835	36.2489	4.02e-08	5.9e-08	38.8159	54.7405	1288.72	1909.29	657.054	1053.61	607.36	984.642	6.0132	10.4341
368	Ba2Mn2O6	P6_3/mmc	194	hexagonal	1.796	5.85993	-2.377	136.168	10	5.67454	5.67459	4.88289	90	90	120	21	18.6976	11.4	5.8515	3.2	1.6	48.0526	47.1159	19.518	10.0951	1.858	0.459408	1.18367	0.2821	199.6	63.4558	1.054	0.56248	2.552	1.10742	87.3764	65.794	3.56e-07	5.58e-07	5.17595	7.08364	949.52	1054.18	536.68	612.575	92.76	75.7382	4.3732	5.34347
370	Mn2C2O6	R-3c	167	trigonal	3.624	3.74156	-1.934	102.029	10	5.83266	5.83265	5.83265	48.4841	48.4841	48.4841	11	7.04273	13.8	3.48712	2.4	0.8	22.9894	16.0489	12.944	5.44756	1.662	0.206146	0.945667	0.400427	174.4	36.8163	0.792	0.252618	2.884	0.750802	108.941	54.9756	2.29e-06	3.9e-06	29.5759	55.294	1380.92	1698.66	1096.68	1465.8	92.76	75.7382	26.1732	45.6907
371	Li2N2O6	R-3c	167	trigonal	3.222	2.5149	-1.252	91.0472	10	5.57097	5.57097	5.57097	49.2115	49.2115	49.2115	6.8	1.93907	12.8	5.9127	2	0	13.7892	3.50999	15.728	2.00554	1.586	0.117576	1.062	0.257091	165.6	24.0133	0.786	0.258426	2.868	0.956627	96.5122	57.6295	1.9e-08	3.8e-08	17.0211	33.9894	392.592	611.224	136.228	158.763	762.6	1230.25	0.8052	1.0987
372	Ba2Ni2O6	P6_3/mmc	194	hexagonal	1.471	6.25047	-1.738	129.655	10	5.62562	5.62563	4.73061	90	90	120	21.6	18.8637	12	5.51362	3.2	1.6	48.8037	47.2494	19.366	10.2812	1.842	0.453802	1.202	0.24758	198.6	62.7681	1.03	0.554401	2.626	1.0488	109.684	49.2041	8.24e-08	1.32e-07	21.8159	35.2855	1119.92	1303.56	578.48	681.439	92.76	75.7382	5.1732	6.72574
373	Mn2Ni2O6	R-3	148	trigonal	1.586	5.63896	-1.596	95.1922	10	5.34379	5.34379	5.34379	54.9384	54.9384	54.9384	15.4	9.11263	13	3.79473	2.8	0.979796	32.3259	20.0311	13.204	5.09571	1.716	0.241379	1.03367	0.278712	187	45.3431	0.876	0.29152	2.758	0.843431	106.893	54.6491	3.02e-07	5.69e-07	19.7759	35.7391	1158.12	1335.39	682.28	771.34	92.76	75.7382	6.2132	7.44592
374	Cs2I2O6	Pmn2_1	31	orthorhombic	2.777	5.17958	-1.24	197.363	10	6.54169	6.53713	4.61523	90	90.3022	90	26.4	22.5442	13.2	6.11228	3.4	1.74356	61.5616	55.8344	29.748	20.8489	1.994	0.739773	1.37267	0.218728	200.4	76.7062	1.132	0.683473	2.754	1.02742	152.717	80.2442	200000000000000	400000000000000	7.30575	14.3481	334.4	336.346	170.568	144.327	644.16	696.218	2.1032	2.91946
375	In2B2O6	R-3c	167	trigonal	3.162	5.48988	-2.3	105.035	10	4.84875	4.84875	5.86936	114.397	90	60	15.6	16.7404	14.8	1.46969	2.6	1.2	34.7254	40.0967	14.446	5.06604	1.682	0.198434	1.026	0.332	177	36.7913	0.836	0.302099	2.828	0.75404	95.7634	55.3772	200000000000	400000000000	21.8159	31.8538	1363.12	1665.71	588.63	892.084	92.76	75.7382	10.7852	19.6427
376	Li2Nb2O6	R-3c	167	trigonal	2.64	4.59766	-2.702	106.795	10	5.20319	5.20319	5.45634	118.477	118.477	60	13.6	13.8362	10.8	6.49307	2.6	1.2	29.5691	31.8624	15.186	2.75119	1.712	0.261258	1.1	0.197585	183.6	43.4401	0.956	0.395656	2.578	1.07321	114.188	34.0442	4.94e-08	6.31e-08	27.8159	35.4185	1380.52	1911.74	673.618	1049.62	737.36	1244.26	6.0932	10.4092
377	Ni2C2O6	R-3c	167	trigonal	3.575	4.4562	-1.554	88.4654	10	4.58942	4.58943	5.52646	90	114.533	60	11.6	8.2365	14.4	2.33238	2.4	0.8	23.7405	17.5446	12.792	5.60972	1.646	0.176363	0.964	0.388309	173.4	34.9033	0.768	0.205465	2.958	0.623038	131.248	12.3462	2.01e-06	3.99e-06	46.2159	58.654	1551.32	1823.84	1138.48	1480.16	92.76	75.7382	26.9732	45.4911
378	La2Cr2O6	R-3c	167	trigonal	2.077	6.68482	-3.156	118.688	10	5.47072	5.47072	5.47072	118.883	118.883	61.1173	21	19.0368	11.4	5.71314	3.6	2.33238	47.78	47.648	16.34	4.95411	1.81	0.373952	1.1784	0.123977	198.6	61.8372	1.032	0.521014	2.616	1.02461	106.516	42.6285	1.48e-07	2.38e-07	21.4159	36.6382	1391.52	1613.69	707.48	858.14	92.76	75.7382	5.4732	7.86204
383	La2Al2O6	R-3c	167	trigonal	4.069	6.5613	-3.558	108.26	10	5.34511	5.34511	5.34511	119.887	60.1134	119.887	18.8	19.1979	12.8	5.03587	3.4	2.33238	42.777	48.252	16.894	3.95941	1.766	0.354378	1.1254	0.227764	194.6	59.3013	1.02	0.515364	2.606	1.03409	102.008	47.7393	1.28e-07	2.44e-07	49.6159	92.8281	1361.12	1585.34	458.174	500.801	92.76	75.7382	3.5132	4.27469
384	Al2Bi2O6	R3c	161	trigonal	2.981	8.55151	-2.329	110.279	10	5.3693	5.3693	5.39627	90	119.835	60	24	29.5635	15.2	1.16619	3	1.54919	56.792	76.213	16.678	3.67278	1.694	0.225175	1.098	0.228749	191	53.1413	0.932	0.366955	2.79	0.806573	111.123	39.7305	2.65e-07	5.17e-07	48.6159	93.2432	979.92	1130.75	328.454	357.026	92.76	75.7382	4.4532	5.18253
385	Ce2Al2O6	I4/mcm	140	tetragonal	3.454	6.60545	-3.475	108.146	10	5.33887	5.33887	5.35229	119.917	119.917	90	19	19.5959	13	4.64758	3.4	2.33238	43.0191	48.7344	16.554	3.52166	1.764	0.350634	1.107	0.226971	192.6	55.8484	1	0.48	2.61	1.02828	105.482	43.9734	1.53e-07	2.93e-07	49.2159	92.9892	1339.12	1552.56	433.174	465.36	92.76	75.7382	3.3732	4.19513
386	Ce2Al2O6	R-3c	167	trigonal	3.475	6.59361	-3.473	108.34	10	5.34908	5.34908	5.34908	119.953	60.0473	119.953	19	19.5959	13	4.64758	3.4	2.33238	43.0191	48.7344	16.554	3.52166	1.764	0.350634	1.107	0.226971	192.6	55.8484	1	0.48	2.61	1.02828	105.482	43.9734	1.53e-07	2.93e-07	49.2159	92.9892	1339.12	1552.56	433.174	465.36	92.76	75.7382	3.3732	4.19513
387	La2Al2O6	I4/mcm	140	tetragonal	3.675	6.59229	-3.556	107.752	10	5.32985	5.32985	5.34323	119.822	119.822	90.1662	18.8	19.1979	12.8	5.03587	3.4	2.33238	42.777	48.252	16.894	3.95941	1.766	0.354378	1.1254	0.227764	194.6	59.3013	1.02	0.515364	2.606	1.03409	102.008	47.7393	1.28e-07	2.44e-07	49.6159	92.8281	1361.12	1585.34	458.174	500.801	92.76	75.7382	3.5132	4.27469
388	La2Al2O6	R-3c	167	trigonal	3.976	6.56337	-3.558	108.226	10	5.34578	5.34578	5.34578	60.0829	119.917	119.917	18.8	19.1979	12.8	5.03587	3.4	2.33238	42.777	48.252	16.894	3.95941	1.766	0.354378	1.1254	0.227764	194.6	59.3013	1.02	0.515364	2.606	1.03409	102.008	47.7393	1.28e-07	2.44e-07	49.6159	92.8281	1361.12	1585.34	458.174	500.801	92.76	75.7382	3.5132	4.27469
389	La2Al2O6	C2/c	15	monoclinic	3.958	6.58548	-3.557	107.863	10	5.3336	5.3336	5.34024	60.1927	119.807	119.84	18.8	19.1979	12.8	5.03587	3.4	2.33238	42.777	48.252	16.894	3.95941	1.766	0.354378	1.1254	0.227764	194.6	59.3013	1.02	0.515364	2.606	1.03409	102.008	47.7393	1.28e-07	2.44e-07	49.6159	92.8281	1361.12	1585.34	458.174	500.801	92.76	75.7382	3.5132	4.27469
391	Ce2Al2O6	Imma	74	orthorhombic	3.768	6.58923	-3.477	108.412	10	5.33962	5.34926	5.34926	119.661	119.94	60.0596	19	19.5959	13	4.64758	3.4	2.33238	43.0191	48.7344	16.554	3.52166	1.764	0.350634	1.107	0.226971	192.6	55.8484	1	0.48	2.61	1.02828	105.482	43.9734	1.53e-07	2.93e-07	49.2159	92.9892	1339.12	1552.56	433.174	465.36	92.76	75.7382	3.3732	4.19513
392	La2Al2O6	Imma	74	orthorhombic	3.963	6.5805	-3.557	107.945	10	5.339	5.339	5.339	119.855	119.735	90.3558	18.8	19.1979	12.8	5.03587	3.4	2.33238	42.777	48.252	16.894	3.95941	1.766	0.354378	1.1254	0.227764	194.6	59.3013	1.02	0.515364	2.606	1.03409	102.008	47.7393	1.28e-07	2.44e-07	49.6159	92.8281	1361.12	1585.34	458.174	500.801	92.76	75.7382	3.5132	4.27469
393	Li2As2O6	R-3	148	trigonal	3.942	4.57262	-1.82	94.3175	10	4.82771	4.82771	5.44097	116.337	116.337	60	12	10.6771	12.8	5.9127	2.4	0.8	25.9722	24.7249	15.61	2.14342	1.646	0.154609	1.068	0.247095	170	25.6437	0.884	0.300506	2.696	0.987068	112.026	35.907	8.5e-08	1.28e-07	27.0159	34.8588	554.52	613.505	341.618	404.828	1077.36	1228.49	6.2732	10.7673
394	La2Al2O6	I4/mcm	140	tetragonal	3.585	6.58474	-3.557	107.875	10	5.32072	5.32072	5.35489	119.789	119.789	90	18.8	19.1979	12.8	5.03587	3.4	2.33238	42.777	48.252	16.894	3.95941	1.766	0.354378	1.1254	0.227764	194.6	59.3013	1.02	0.515364	2.606	1.03409	102.008	47.7393	1.28e-07	2.44e-07	49.6159	92.8281	1361.12	1585.34	458.174	500.801	92.76	75.7382	3.5132	4.27469
395	Cr2Bi2O6	R3c	161	trigonal	1.759	8.57954	-1.953	119.602	10	5.51147	5.51147	5.51147	60.4556	60.4556	60.4556	26.2	29.0682	13.8	3.91918	3.2	1.6	61.7949	74.9016	16.124	4.70278	1.738	0.267013	1.151	0.136836	195	56.2139	0.944	0.377656	2.8	0.792061	115.63	32.1634	2.85e-07	5.1e-07	20.4159	36.9214	1010.32	1180.03	577.76	823.255	92.76	75.7382	6.4132	8.16777
396	Mn2Ge2O6	R-3	148	trigonal	2.017	5.54581	-2.024	105.143	10	5.05002	5.05002	5.5825	116.892	116.892	60	16.2	10.284	13.8	3.48712	2.8	0.979796	35.1152	24.072	14.612	3.90782	1.744	0.274998	1.03967	0.272581	184.8	42.9204	0.882	0.297752	2.776	0.826138	108.373	54.8547	0.000100288	0.000199857	13.5759	23.4065	1139.52	1307.37	578.96	649.29	92.76	75.7382	9.1332	12.398
397	Li2Nb2O6	R3c	161	trigonal	3.459	4.61443	-2.737	106.407	10	5.14452	5.14452	5.51132	117.822	62.1782	120	13.6	13.8362	10.8	6.49307	2.6	1.2	29.5691	31.8624	15.186	2.75119	1.712	0.261258	1.1	0.197585	183.6	43.4401	0.956	0.395656	2.578	1.07321	114.188	34.0442	4.94e-08	6.31e-08	27.8159	35.4185	1380.52	1911.74	673.618	1049.62	737.36	1244.26	6.0932	10.4092
398	Na2N2O6	R-3c	167	trigonal	3.119	2.47305	-1.245	114.14	10	5.00568	5.00568	6.00161	90	114.647	60	8.4	1.35647	12.8	5.9127	2.2	0.4	16.9989	3.09324	17.88	3.30021	1.676	0.297227	1.114	0.24508	173.2	38.8968	0.846	0.377974	2.858	0.976369	95.159	58.5516	9.8e-09	1.96e-08	28.0211	55.9894	300.792	427.633	119.664	125.644	632.6	970.262	0.7252	0.938922
400	Na1Nb1O3	Pm-3m	221	cubic	1.748	4.34413	-2.666	62.6484	5	3.97164	3.97164	3.97164	90	90	90	15.2	12.9522	10.8	6.49307	2.8	1.16619	32.7789	30.1854	17.338	4.09524	1.802	0.346549	1.152	0.170458	191.2	50.4951	1.016	0.460678	2.568	1.08818	112.835	36.2489	4.02e-08	5.9e-08	38.8159	54.7405	1288.72	1909.29	657.054	1053.61	607.36	984.642	6.0132	10.4341
402	Na1Nb1O3	Pm-3m	221	cubic	1.751	4.33506	-2.667	62.7796	5	3.97426	3.97473	3.97426	90	90.1856	90	15.2	12.9522	10.8	6.49307	2.8	1.16619	32.7789	30.1854	17.338	4.09524	1.802	0.346549	1.152	0.170458	191.2	50.4951	1.016	0.460678	2.568	1.08818	112.835	36.2489	4.02e-08	5.9e-08	38.8159	54.7405	1288.72	1909.29	657.054	1053.61	607.36	984.642	6.0132	10.4341
403	Li4I4O12	Pna2_1	33	orthorhombic	3.749	4.32144	-1.244	279.498	20	9.31442	5.78491	5.18713	90	90	90	16	18.6011	13.2	6.11228	2.6	1.2	36.3687	45.4036	18.164	4.13505	1.672	0.192914	1.19067	0.145425	173.2	28.5265	0.916	0.338562	2.792	0.955037	155.543	76.5846	200000000000000	400000000000000	17.1057	33.9475	468.6	590.579	200.988	180.286	901.16	1189.1	2.2852	2.94125
404	Li4As4O12	C2/c	15	monoclinic	3.215	3.74997	-1.782	230.016	20	5.23669	6.84555	6.84555	94.9971	104.461	75.5391	12	10.6771	12.8	5.9127	2.4	0.8	25.9722	24.7249	15.61	2.14342	1.646	0.154609	1.068	0.247095	170	25.6437	0.884	0.300506	2.696	0.987068	112.026	35.907	8.5e-08	1.28e-07	27.0159	34.8588	554.52	613.505	341.618	404.828	1077.36	1228.49	6.2732	10.7673
405	Li6Nb6O18	R-3c	167	trigonal	2.59	4.5729	-2.705	322.119	30	5.2065	5.2065	13.7212	90	90	120	13.6	13.8362	10.8	6.49307	2.6	1.2	29.5691	31.8624	15.186	2.75119	1.712	0.261258	1.1	0.197585	183.6	43.4401	0.956	0.395656	2.578	1.07321	114.188	34.0442	4.94e-08	6.31e-08	27.8159	35.4185	1380.52	1911.74	673.618	1049.62	737.36	1244.26	6.0932	10.4092
406	Li8Bi8O24	Pccn	56	orthorhombic	0.775	7.51395	-1.482	466.598	40	8.86624	4.897	10.7467	90	90	90	22	30.5614	12.8	5.9127	2.8	1.6	52.7839	78.177	17.282	2.62327	1.69	0.222711	1.143	0.149519	188.4	51.7131	0.944	0.377656	2.664	1.0057	114.697	33.6718	2.79e-07	5.12e-07	18.6159	33.3354	744.52	804.444	232.498	219.517	737.36	1244.26	2.9132	4.1358
407	Na1Nb1O3	Pm-3m	221	cubic	1.153	2.32612	-2.669	116.999	5	4.89095	4.89095	4.89095	90	90	90	15.2	12.9522	10.8	6.49307	2.8	1.16619	32.7789	30.1854	17.338	4.09524	1.802	0.346549	1.152	0.170458	191.2	50.4951	1.016	0.460678	2.568	1.08818	112.835	36.2489	4.02e-08	5.9e-08	38.8159	54.7405	1288.72	1909.29	657.054	1053.61	607.36	984.642	6.0132	10.4341
408	Na1Nb1O3	Pm-3m	221	cubic	1.154	4.23866	-2.669	64.2073	5	4.00431	4.00431	4.00431	90	90	90	15.2	12.9522	10.8	6.49307	2.8	1.16619	32.7789	30.1854	17.338	4.09524	1.802	0.346549	1.152	0.170458	191.2	50.4951	1.016	0.460678	2.568	1.08818	112.835	36.2489	4.02e-08	5.9e-08	38.8159	54.7405	1288.72	1909.29	657.054	1053.61	607.36	984.642	6.0132	10.4341
409	Na1Nb1O3	Pm-3m	221	cubic	1.769	4.31799	-2.669	63.0276	5	3.97964	3.97964	3.97964	90	90	90	15.2	12.9522	10.8	6.49307	2.8	1.16619	32.7789	30.1854	17.338	4.09524	1.802	0.346549	1.152	0.170458	191.2	50.4951	1.016	0.460678	2.568	1.08818	112.835	36.2489	4.02e-08	5.9e-08	38.8159	54.7405	1288.72	1909.29	657.054	1053.61	607.36	984.642	6.0132	10.4341
410	Ce1Er1O3	Pm-3m	221	cubic	0.488	4.73294	-3.25	124.682	5	4.99575	4.99575	4.99575	90	90	90	30	27.1293	13.2	4.66476	4.4	2.93939	71.0746	67.997	18.246	1.29413	1.854	0.411125	1.178	0.101666	203.4	65.4633	1.106	0.57116	2.536	1.10782	97.1296	57.2463	3.2e-07	3.94e-07	5.21595	6.4803	1408.92	1622.57	606.88	714.887	92.76	75.7382	5.2132	7.62261
411	Ce1Er1O3	Pm-3m	221	cubic	1.318	4.73294	-3.25	124.682	5	4.99575	4.99575	4.99575	90	90	90	30	27.1293	13.2	4.66476	4.4	2.93939	71.0746	67.997	18.246	1.29413	1.854	0.411125	1.178	0.101666	203.4	65.4633	1.106	0.57116	2.536	1.10782	97.1296	57.2463	3.2e-07	3.94e-07	5.21595	6.4803	1408.92	1622.57	606.88	714.887	92.76	75.7382	5.2132	7.62261
412	Ce1Er1O3	Pm-3m	221	cubic	1.319	7.6281	-3.25	77.3602	5	4.26094	4.26094	4.26094	90	90	90	30	27.1293	13.2	4.66476	4.4	2.93939	71.0746	67.997	18.246	1.29413	1.854	0.411125	1.178	0.101666	203.4	65.4633	1.106	0.57116	2.536	1.10782	97.1296	57.2463	3.2e-07	3.94e-07	5.21595	6.4803	1408.92	1622.57	606.88	714.887	92.76	75.7382	5.2132	7.62261
413	Ce1Er1O3	Pm-3m	221	cubic	1.899	7.67435	-3.25	76.894	5	4.25237	4.25237	4.25237	90	90	90	30	27.1293	13.2	4.66476	4.4	2.93939	71.0746	67.997	18.246	1.29413	1.854	0.411125	1.178	0.101666	203.4	65.4633	1.106	0.57116	2.536	1.10782	97.1296	57.2463	3.2e-07	3.94e-07	5.21595	6.4803	1408.92	1622.57	606.88	714.887	92.76	75.7382	5.2132	7.62261
414	La1Al1O3	Pm-3m	221	cubic	3.252	3.12028	-3.554	113.824	5	4.84632	4.84632	4.84632	90	90	90	18.8	19.1979	12.8	5.03587	3.4	2.33238	42.777	48.252	16.894	3.95941	1.766	0.354378	1.1254	0.227764	194.6	59.3013	1.02	0.515364	2.606	1.03409	102.008	47.7393	1.28e-07	2.44e-07	49.6159	92.8281	1361.12	1585.34	458.174	500.801	92.76	75.7382	3.5132	4.27469
415	La1Al1O3	Pm-3m	221	cubic	3.257	6.40482	-3.554	55.4527	5	3.81336	3.81336	3.81336	90	90	90	18.8	19.1979	12.8	5.03587	3.4	2.33238	42.777	48.252	16.894	3.95941	1.766	0.354378	1.1254	0.227764	194.6	59.3013	1.02	0.515364	2.606	1.03409	102.008	47.7393	1.28e-07	2.44e-07	49.6159	92.8281	1361.12	1585.34	458.174	500.801	92.76	75.7382	3.5132	4.27469
416	La1Al1O3	Pm-3m	221	cubic	3.656	6.55793	-3.554	54.158	5	3.78345	3.78345	3.78345	90	90	90	18.8	19.1979	12.8	5.03587	3.4	2.33238	42.777	48.252	16.894	3.95941	1.766	0.354378	1.1254	0.227764	194.6	59.3013	1.02	0.515364	2.606	1.03409	102.008	47.7393	1.28e-07	2.44e-07	49.6159	92.8281	1361.12	1585.34	458.174	500.801	92.76	75.7382	3.5132	4.27469
417	Nd1Gd1O3	Pm-3m	221	cubic	0.275	4.57196	-2.551	126.935	5	5.02567	5.02567	5.02567	90	90	90	29.6	26.4847	12.8	4.11825	4.4	2.93939	69.898	66.1401	18.514	1.4301	1.858	0.414266	1.2263	0.0759194	204.8	67.3065	1.124	0.59308	2.534	1.10984	84.5856	69.0639	3.91e-07	5.23e-07	5.61595	7.10363	1433.32	1645.66	609.28	685.176	92.76	75.7382	3.5532	4.18167
418	Nd1Gd1O3	Pm-3m	221	cubic	0.275	6.66718	-2.551	87.0446	5	4.4318	4.4318	4.4318	90	90	90	29.6	26.4847	12.8	4.11825	4.4	2.93939	69.898	66.1401	18.514	1.4301	1.858	0.414266	1.2263	0.0759194	204.8	67.3065	1.124	0.59308	2.534	1.10984	84.5856	69.0639	3.91e-07	5.23e-07	5.61595	7.10363	1433.32	1645.66	609.28	685.176	92.76	75.7382	3.5532	4.18167
419	Nd1Gd1O3	Pm-3m	221	cubic	0.77	6.63307	-2.551	87.4922	5	4.43939	4.43939	4.43939	90	90	90	29.6	26.4847	12.8	4.11825	4.4	2.93939	69.898	66.1401	18.514	1.4301	1.858	0.414266	1.2263	0.0759194	204.8	67.3065	1.124	0.59308	2.534	1.10984	84.5856	69.0639	3.91e-07	5.23e-07	5.61595	7.10363	1433.32	1645.66	609.28	685.176	92.76	75.7382	3.5532	4.18167
421	Nb1B1O3	Pm-3m	221	cubic	1.228	2.9512	-1.19	85.3652	5	4.40312	4.40312	4.40312	90	90	90	14	13.5499	13.2	4.26146	2.6	1.2	30.3431	31.3461	13.46	5.19253	1.732	0.272353	1.002	0.341549	179.6	41.5192	0.864	0.356516	2.79	0.808703	107.66	45.1871	200000000000	400000000000	16.2159	21.588	1897.52	2228.53	1052.68	1228.71	92.76	75.7382	15.4932	20.0908
422	Nb1B1O3	Pm-3m	221	cubic	1.226	4.12588	-1.19	61.0608	5	3.9378	3.9378	3.9378	90	90	90	14	13.5499	13.2	4.26146	2.6	1.2	30.3431	31.3461	13.46	5.19253	1.732	0.272353	1.002	0.341549	179.6	41.5192	0.864	0.356516	2.79	0.808703	107.66	45.1871	200000000000	400000000000	16.2159	21.588	1897.52	2228.53	1052.68	1228.71	92.76	75.7382	15.4932	20.0908
423	Nb1B1O3	Pm-3m	221	cubic	1.773	4.05507	-1.19	62.1271	5	3.9606	3.9606	3.9606	90	90	90	14	13.5499	13.2	4.26146	2.6	1.2	30.3431	31.3461	13.46	5.19253	1.732	0.272353	1.002	0.341549	179.6	41.5192	0.864	0.356516	2.79	0.808703	107.66	45.1871	200000000000	400000000000	16.2159	21.588	1897.52	2228.53	1052.68	1228.71	92.76	75.7382	15.4932	20.0908
424	Mg1Ge1O3	Pm-3m	221	cubic	1.08	2.27991	-1.882	105.567	5	4.72617	4.72617	4.72617	90	90	90	13.6	9.32952	12.8	5.45527	2.6	0.8	28.9886	22.0615	15.942	1.74063	1.68	0.22987	1.082	0.219854	186	44.6363	0.904	0.32946	2.728	0.899675	108.373	54.8547	0.000100009	0.000199996	44.0159	62.4708	945.32	1181.58	459.76	504.288	92.76	75.7382	8.2332	12.2323
425	Mg1Ge1O3	Pm-3m	221	cubic	1.357	4.66806	-1.882	51.5597	5	3.72195	3.72195	3.72195	90	90	90	13.6	9.32952	12.8	5.45527	2.6	0.8	28.9886	22.0615	15.942	1.74063	1.68	0.22987	1.082	0.219854	186	44.6363	0.904	0.32946	2.728	0.899675	108.373	54.8547	0.000100009	0.000199996	44.0159	62.4708	945.32	1181.58	459.76	504.288	92.76	75.7382	8.2332	12.2323
426	Mg1Ge1O3	Pm-3m	221	cubic	1.492	4.79111	-1.882	50.2355	5	3.68981	3.68981	3.68981	90	90	90	13.6	9.32952	12.8	5.45527	2.6	0.8	28.9886	22.0615	15.942	1.74063	1.68	0.22987	1.082	0.219854	186	44.6363	0.904	0.32946	2.728	0.899675	108.373	54.8547	0.000100009	0.000199996	44.0159	62.4708	945.32	1181.58	459.76	504.288	92.76	75.7382	8.2332	12.2323
427	Ac1Al1O3	Pm-3m	221	cubic	3.86	4.40947	-3.532	113.721	5	4.84485	4.84485	4.84485	90	90	90	25.2	31.9587	12.8	5.03587	3.6	2.72764	60.3959	83.4105	16.926	4.0041	1.774	0.36941	1.143	0.234	191.6	54.1502	1.034	0.540503	2.604	1.03701	99.692	50.6255	5.4e-09	1.08e-08	49.4159	92.9078	1327.12	1534.91	484.174	540.108	92.76	75.7382	5.0732	6.03243
428	Ac1Al1O3	Pm-3m	221	cubic	3.866	8.54519	-3.532	58.6821	5	3.88599	3.88599	3.88599	90	90	90	25.2	31.9587	12.8	5.03587	3.6	2.72764	60.3959	83.4105	16.926	4.0041	1.774	0.36941	1.143	0.234	191.6	54.1502	1.034	0.540503	2.604	1.03701	99.692	50.6255	5.4e-09	1.08e-08	49.4159	92.9078	1327.12	1534.91	484.174	540.108	92.76	75.7382	5.0732	6.03243
429	Ac1Al1O3	Pm-3m	221	cubic	4.202	8.72171	-3.532	57.4944	5	3.8596	3.8596	3.8596	90	90	90	25.2	31.9587	12.8	5.03587	3.6	2.72764	60.3959	83.4105	16.926	4.0041	1.774	0.36941	1.143	0.234	191.6	54.1502	1.034	0.540503	2.604	1.03701	99.692	50.6255	5.4e-09	1.08e-08	49.4159	92.9078	1327.12	1534.91	484.174	540.108	92.76	75.7382	5.0732	6.03243
430	Lu1Bi1O3	Pm-3m	221	cubic	0.509	9.7191	-2.2	73.7993	5	4.19454	4.19454	4.19454	90	90	90	35.6	34.0153	16	0.632456	4	2.52982	86.3891	86.8778	18.234	1.54658	1.774	0.315696	1.1632	0.119042	198.6	59.7649	1.032	0.486062	2.722	0.910789	109.332	42.8917	3.76e-07	5.14e-07	4.81595	6.38804	1156.52	1429.47	526.76	724.379	92.76	75.7382	6.7132	8.69048
431	Ho1B1O3	Pm-3m	221	cubic	2.557	3.77191	-2.528	98.4988	5	4.61824	4.61824	4.61824	90	90	90	19.2	23.9282	14.8	1.46969	3.2	2.4	44.7479	60.1248	15.042	5.35275	1.756	0.313024	1.0462	0.329214	185	51.6294	0.91	0.446766	2.718	0.920617	89.9834	63.0334	200000000000	400000000000	8.61595	11.08	1492.72	1759.62	849.48	992.521	92.76	75.7382	13.5332	19.3567
432	Ho1B1O3	Pm-3m	221	cubic	2.83	8.88634	-2.528	41.8089	5	3.47075	3.47075	3.47075	90	90	90	19.2	23.9282	14.8	1.46969	3.2	2.4	44.7479	60.1248	15.042	5.35275	1.756	0.313024	1.0462	0.329214	185	51.6294	0.91	0.446766	2.718	0.920617	89.9834	63.0334	200000000000	400000000000	8.61595	11.08	1492.72	1759.62	849.48	992.521	92.76	75.7382	13.5332	19.3567
433	Ho1B1O3	Pm-3m	221	cubic	2.96	9.10259	-2.528	40.8157	5	3.44304	3.44304	3.44304	90	90	90	19.2	23.9282	14.8	1.46969	3.2	2.4	44.7479	60.1248	15.042	5.35275	1.756	0.313024	1.0462	0.329214	185	51.6294	0.91	0.446766	2.718	0.920617	89.9834	63.0334	200000000000	400000000000	8.61595	11.08	1492.72	1759.62	849.48	992.521	92.76	75.7382	13.5332	19.3567
434	Al1As1O3	Pm-3m	221	cubic	0.251	5.11911	-1.712	48.6251	5	3.64995	3.64995	3.64995	90	90	90	14	9.69536	15.2	1.16619	2.6	0.8	29.9803	22.8697	15.006	3.03022	1.65	0.159248	1.023	0.290303	172.6	30.0506	0.872	0.284422	2.822	0.778059	108.452	41.4118	7.14e-08	1.3e-07	57.0159	91.0724	789.92	1047.53	437.574	471.406	432.76	636.443	7.8132	10.7396
435	Dy1Cr1O3	Pm-3m	221	cubic	1.455	4.21869	-2.888	103.322	5	4.69242	4.69242	4.69242	90	90	90	22.8	22.4713	13.2	3.91918	3.6	2.33238	52.4989	56.74	15.664	4.26515	1.786	0.335237	1.1702	0.125476	195.2	56.5169	1.004	0.473016	2.64	0.989626	97.4456	57.0596	2.11e-07	3.61e-07	21.0159	36.7387	1210.92	1372.99	804.88	932.164	92.76	75.7382	6.4532	8.1901
436	Dy1Cr1O3	Pm-3m	221	cubic	1.343	7.69094	-2.888	56.6747	5	3.84117	3.84117	3.84117	90	90	90	22.8	22.4713	13.2	3.91918	3.6	2.33238	52.4989	56.74	15.664	4.26515	1.786	0.335237	1.1702	0.125476	195.2	56.5169	1.004	0.473016	2.64	0.989626	97.4456	57.0596	2.11e-07	3.61e-07	21.0159	36.7387	1210.92	1372.99	804.88	932.164	92.76	75.7382	6.4532	8.1901
437	Dy1Cr1O3	Pm-3m	221	cubic	1.744	7.82874	-2.888	55.6772	5	3.8185	3.8185	3.8185	90	90	90	22.8	22.4713	13.2	3.91918	3.6	2.33238	52.4989	56.74	15.664	4.26515	1.786	0.335237	1.1702	0.125476	195.2	56.5169	1.004	0.473016	2.64	0.989626	97.4456	57.0596	2.11e-07	3.61e-07	21.0159	36.7387	1210.92	1372.99	804.88	932.164	92.76	75.7382	6.4532	8.1901
438	Dy1Co1O3	Pm-3m	221	cubic	0.896	8.87926	-2.302	50.3873	5	3.69352	3.69352	3.69352	90	90	90	23.4	22.5353	13.8	2.85657	3.6	2.33238	53.8863	56.7955	15.552	4.48674	1.774	0.326166	1.13587	0.190437	194.2	55.6647	0.98	0.460261	2.684	0.949139	97.3602	57.1094	1.97e-07	3.65e-07	22.2159	39.1235	1262.12	1439.81	722.48	818.211	92.76	75.7382	5.5932	6.77316
443	Dy1Er1O3	Pm-3m	221	cubic	0.901	5.14691	-2.844	121.875	5	4.95798	4.95798	4.95798	90	90	90	31.6	28.9109	14.8	1.6	4.4	2.93939	75.5514	72.9516	17.91	0.695701	1.832	0.382173	1.1882	0.0935573	202	63.6899	1.098	0.561013	2.556	1.08269	84.5856	69.0639	3.57e-07	4.38e-07	5.21595	6.4803	1250.32	1424.04	729.28	826.966	92.76	75.7382	6.3332	7.98525
444	Dy1Er1O3	Pm-3m	221	cubic	0.912	8.1353	-2.844	77.106	5	4.25627	4.25627	4.25627	90	90	90	31.6	28.9109	14.8	1.6	4.4	2.93939	75.5514	72.9516	17.91	0.695701	1.832	0.382173	1.1882	0.0935573	202	63.6899	1.098	0.561013	2.556	1.08269	84.5856	69.0639	3.57e-07	4.38e-07	5.21595	6.4803	1250.32	1424.04	729.28	826.966	92.76	75.7382	6.3332	7.98525
445	Dy1Er1O3	Pm-3m	221	cubic	1.14	8.16454	-2.844	76.8299	5	4.25119	4.25119	4.25119	90	90	90	31.6	28.9109	14.8	1.6	4.4	2.93939	75.5514	72.9516	17.91	0.695701	1.832	0.382173	1.1882	0.0935573	202	63.6899	1.098	0.561013	2.556	1.08269	84.5856	69.0639	3.57e-07	4.38e-07	5.21595	6.4803	1250.32	1424.04	729.28	826.966	92.76	75.7382	6.3332	7.98525
446	Gd1Cr1O3	Pm-3m	221	cubic	1.461	4.07463	-2.923	104.835	5	4.71522	4.71522	4.71522	90	90	90	22.4	21.7035	12.8	4.11825	3.6	2.33238	51.4489	54.7068	15.842	4.41694	1.792	0.344697	1.159	0.130859	194.8	55.9121	1.008	0.479767	2.638	0.9925	97.4456	57.0596	2.87e-07	5.14e-07	21.0159	36.7387	1347.52	1550.74	785.88	914.942	92.76	75.7382	6.2332	8.07631
447	Gd1Cr1O3	Pm-3m	221	cubic	1.355	7.47269	-2.923	57.1634	5	3.85217	3.85217	3.85217	90	90	90	22.4	21.7035	12.8	4.11825	3.6	2.33238	51.4489	54.7068	15.842	4.41694	1.792	0.344697	1.159	0.130859	194.8	55.9121	1.008	0.479767	2.638	0.9925	97.4456	57.0596	2.87e-07	5.14e-07	21.0159	36.7387	1347.52	1550.74	785.88	914.942	92.76	75.7382	6.2332	8.07631
448	Gd1Cr1O3	Pm-3m	221	cubic	1.715	7.59991	-2.923	56.2065	5	3.83056	3.83056	3.83056	90	90	90	22.4	21.7035	12.8	4.11825	3.6	2.33238	51.4489	54.7068	15.842	4.41694	1.792	0.344697	1.159	0.130859	194.8	55.9121	1.008	0.479767	2.638	0.9925	97.4456	57.0596	2.87e-07	5.14e-07	21.0159	36.7387	1347.52	1550.74	785.88	914.942	92.76	75.7382	6.2332	8.07631
449	Nd1Lu1O3	Pm-3m	221	cubic	1.584	4.9418	-3.315	123.389	5	4.97842	4.97842	4.97842	90	90	90	31	28.3831	14.2	4.11825	4.4	2.93939	73.4414	71.0196	18.09	1.26054	1.838	0.392347	1.2115	0.105444	201.6	64.0019	1.108	0.574888	2.546	1.09569	91.1476	61.9028	2.45e-07	3e-07	6.61595	8.07649	1463.72	1684.92	677.28	787.82	92.76	75.7382	5.9532	8.45405
450	Nd1Lu1O3	Pm-3m	221	cubic	1.585	8.33719	-3.315	73.1376	5	4.18196	4.18196	4.18196	90	90	90	31	28.3831	14.2	4.11825	4.4	2.93939	73.4414	71.0196	18.09	1.26054	1.838	0.392347	1.2115	0.105444	201.6	64.0019	1.108	0.574888	2.546	1.09569	91.1476	61.9028	2.45e-07	3e-07	6.61595	8.07649	1463.72	1684.92	677.28	787.82	92.76	75.7382	5.9532	8.45405
451	Nd1Lu1O3	Pm-3m	221	cubic	2.071	8.38565	-3.315	72.7149	5	4.17389	4.17389	4.17389	90	90	90	31	28.3831	14.2	4.11825	4.4	2.93939	73.4414	71.0196	18.09	1.26054	1.838	0.392347	1.2115	0.105444	201.6	64.0019	1.108	0.574888	2.546	1.09569	91.1476	61.9028	2.45e-07	3e-07	6.61595	8.07649	1463.72	1684.92	677.28	787.82	92.76	75.7382	5.9532	8.45405
452	La1Dy1O3	Pm-3m	221	cubic	1.033	4.50558	-3.253	128.773	5	5.04981	5.04981	5.04981	90	90	90	29.4	26.3636	12.6	5.04381	4.4	2.93939	69.8807	66.4114	18.696	1.95443	1.86	0.418139	1.2166	0.0547123	205.8	68.5519	1.132	0.604199	2.528	1.11761	93.6556	59.7034	3.08e-07	3.9e-07	4.81595	5.89975	1370.72	1594.09	607.48	694.19	92.76	75.7382	3.5932	4.41004
453	La1Dy1O3	Pm-3m	221	cubic	1.033	7.24357	-3.253	80.0984	5	4.31064	4.31064	4.31064	90	90	90	29.4	26.3636	12.6	5.04381	4.4	2.93939	69.8807	66.4114	18.696	1.95443	1.86	0.418139	1.2166	0.0547123	205.8	68.5519	1.132	0.604199	2.528	1.11761	93.6556	59.7034	3.08e-07	3.9e-07	4.81595	5.89975	1370.72	1594.09	607.48	694.19	92.76	75.7382	3.5932	4.41004
454	La1Dy1O3	Pm-3m	221	cubic	1.761	7.30605	-3.253	79.4134	5	4.29831	4.29831	4.29831	90	90	90	29.4	26.3636	12.6	5.04381	4.4	2.93939	69.8807	66.4114	18.696	1.95443	1.86	0.418139	1.2166	0.0547123	205.8	68.5519	1.132	0.604199	2.528	1.11761	93.6556	59.7034	3.08e-07	3.9e-07	4.81595	5.89975	1370.72	1594.09	607.48	694.19	92.76	75.7382	3.5932	4.41004
455	Ac1In1O3	Pm-3m	221	cubic	2.442	5.25437	-2.57	123.194	5	4.9758	4.9758	4.9758	90	90	90	32.4	32.4506	12.8	5.03587	4	2.75681	77.9632	83.772	18.078	2.32028	1.792	0.374347	1.196	0.128	195.2	56.7852	1.07	0.558713	2.638	1.00619	97.1196	53.735	1.6e-08	3.2e-08	18.8159	31.9306	1237.72	1458.08	383.43	491.717	92.76	75.7382	3.5852	5.33867
456	Ac1In1O3	Pm-3m	221	cubic	2.228	8.75634	-2.57	73.9242	5	4.1969	4.1969	4.1969	90	90	90	32.4	32.4506	12.8	5.03587	4	2.75681	77.9632	83.772	18.078	2.32028	1.792	0.374347	1.196	0.128	195.2	56.7852	1.07	0.558713	2.638	1.00619	97.1196	53.735	1.6e-08	3.2e-08	18.8159	31.9306	1237.72	1458.08	383.43	491.717	92.76	75.7382	3.5852	5.33867
457	Ac1In1O3	Pm-3m	221	cubic	2.382	8.84879	-2.57	73.1518	5	4.18223	4.18223	4.18223	90	90	90	32.4	32.4506	12.8	5.03587	4	2.75681	77.9632	83.772	18.078	2.32028	1.792	0.374347	1.196	0.128	195.2	56.7852	1.07	0.558713	2.638	1.00619	97.1196	53.735	1.6e-08	3.2e-08	18.8159	31.9306	1237.72	1458.08	383.43	491.717	92.76	75.7382	3.5852	5.33867
458	Ho1Ga1O3	Pm-3m	221	cubic	2.615	4.2505	-2.673	110.423	5	4.79756	4.79756	4.79756	90	90	90	24.4	23.0877	14.8	1.46969	3.6	2.33238	56.5303	58.0567	16.524	2.42172	1.746	0.308389	1.1162	0.197266	193	55.0781	0.988	0.461537	2.672	0.958319	92.8836	60.3445	1.91e-07	3.16e-07	9.01595	11.7522	1148.12	1305.92	440.262	653.967	92.76	75.7382	4.6512	6.51502
459	Ho1Ga1O3	Pm-3m	221	cubic	2.647	8.4005	-2.673	55.8722	5	3.82295	3.82295	3.82295	90	90	90	24.4	23.0877	14.8	1.46969	3.6	2.33238	56.5303	58.0567	16.524	2.42172	1.746	0.308389	1.1162	0.197266	193	55.0781	0.988	0.461537	2.672	0.958319	92.8836	60.3445	1.91e-07	3.16e-07	9.01595	11.7522	1148.12	1305.92	440.262	653.967	92.76	75.7382	4.6512	6.51502
460	Ho1Ga1O3	Pm-3m	221	cubic	3.115	8.59342	-2.673	54.6178	5	3.79412	3.79412	3.79412	90	90	90	24.4	23.0877	14.8	1.46969	3.6	2.33238	56.5303	58.0567	16.524	2.42172	1.746	0.308389	1.1162	0.197266	193	55.0781	0.988	0.461537	2.672	0.958319	92.8836	60.3445	1.91e-07	3.16e-07	9.01595	11.7522	1148.12	1305.92	440.262	653.967	92.76	75.7382	4.6512	6.51502
461	Nd1Cr1O3	Pm-3m	221	cubic	1.502	3.82811	-2.977	105.944	5	4.73178	4.73178	4.73178	90	90	90	21.6	20.1752	12	4.89898	3.6	2.33238	48.8473	49.6931	15.98	4.55034	1.802	0.360799	1.1993	0.129807	198	60.8769	1.02	0.50024	2.624	1.01283	97.4456	57.0596	1.54e-07	2.49e-07	22.2159	36.4891	1317.52	1509.26	728.28	870.823	92.76	75.7382	5.6532	7.88688
462	Nd1Cr1O3	Pm-3m	221	cubic	1.319	6.92194	-2.977	58.5911	5	3.88398	3.88398	3.88398	90	90	90	21.6	20.1752	12	4.89898	3.6	2.33238	48.8473	49.6931	15.98	4.55034	1.802	0.360799	1.1993	0.129807	198	60.8769	1.02	0.50024	2.624	1.01283	97.4456	57.0596	1.54e-07	2.49e-07	22.2159	36.4891	1317.52	1509.26	728.28	870.823	92.76	75.7382	5.6532	7.88688
463	Nd1Cr1O3	Pm-3m	221	cubic	1.703	7.00952	-2.977	57.859	5	3.86774	3.86774	3.86774	90	90	90	21.6	20.1752	12	4.89898	3.6	2.33238	48.8473	49.6931	15.98	4.55034	1.802	0.360799	1.1993	0.129807	198	60.8769	1.02	0.50024	2.624	1.01283	97.4456	57.0596	1.54e-07	2.49e-07	22.2159	36.4891	1317.52	1509.26	728.28	870.823	92.76	75.7382	5.6532	7.88688
464	Ce1Nd1O3	Pm-3m	221	cubic	0.828	5.9056	-2.517	93.4521	5	4.53798	4.53798	4.53798	90	90	90	28.4	24.9928	11.6	5.42586	4.4	2.93939	66.4712	61.8289	18.672	1.60718	1.874	0.433663	1.2273	0.0739267	206.6	69.3559	1.128	0.597809	2.516	1.13168	97.1296	57.2463	2.77e-07	3.4e-07	5.61595	7.10363	1455.32	1673.94	505.88	557.184	92.76	75.7382	2.6532	3.02028
465	Nb1Ag1O3	Pm-3m	221	cubic	0.957	4.35997	-1.992	94.7477	5	4.55886	4.55886	4.55886	90	90	90	22.4	17.7381	12.8	4.35431	3.2	1.46969	49.7546	41.6113	14.636	3.3409	1.77	0.306985	1.13733	0.172284	191.8	51.2031	0.968	0.406664	2.768	0.830022	127.387	20.389	3.37e-08	5.95e-08	96.8159	167.898	1544.52	1959.4	829.866	1063.31	92.76	75.7382	7.7532	10.4453
466	Nb1Ag1O3	Pm-3m	221	cubic	0.957	6.51966	-1.992	63.3618	5	3.98666	3.98666	3.98666	90	90	90	22.4	17.7381	12.8	4.35431	3.2	1.46969	49.7546	41.6113	14.636	3.3409	1.77	0.306985	1.13733	0.172284	191.8	51.2031	0.968	0.406664	2.768	0.830022	127.387	20.389	3.37e-08	5.95e-08	96.8159	167.898	1544.52	1959.4	829.866	1063.31	92.76	75.7382	7.7532	10.4453
467	Nb1Ag1O3	Pm-3m	221	cubic	1.368	6.49245	-1.992	63.6272	5	3.99222	3.99222	3.99222	90	90	90	22.4	17.7381	12.8	4.35431	3.2	1.46969	49.7546	41.6113	14.636	3.3409	1.77	0.306985	1.13733	0.172284	191.8	51.2031	0.968	0.406664	2.768	0.830022	127.387	20.389	3.37e-08	5.95e-08	96.8159	167.898	1544.52	1959.4	829.866	1063.31	92.76	75.7382	7.7532	10.4453
468	Dy1Ga1O3	Pm-3m	221	cubic	2.58	4.19798	-2.692	110.843	5	4.80363	4.80363	4.80363	90	90	90	24.2	22.7192	14.6	1.74356	3.6	2.33238	56.0442	57.1502	16.578	2.47299	1.748	0.311987	1.1342	0.193656	192.6	54.4265	0.99	0.465016	2.67	0.961332	92.8836	60.3445	2.13e-07	3.61e-07	8.01595	11.3201	1117.52	1263.43	429.462	632.61	92.76	75.7382	3.4712	4.34419
469	Dy1Ga1O3	Pm-3m	221	cubic	2.605	8.2938	-2.692	56.1043	5	3.82824	3.82824	3.82824	90	90	90	24.2	22.7192	14.6	1.74356	3.6	2.33238	56.0442	57.1502	16.578	2.47299	1.748	0.311987	1.1342	0.193656	192.6	54.4265	0.99	0.465016	2.67	0.961332	92.8836	60.3445	2.13e-07	3.61e-07	8.01595	11.3201	1117.52	1263.43	429.462	632.61	92.76	75.7382	3.4712	4.34419
470	Dy1Ga1O3	Pm-3m	221	cubic	3.054	8.47522	-2.692	54.9034	5	3.80072	3.80072	3.80072	90	90	90	24.2	22.7192	14.6	1.74356	3.6	2.33238	56.0442	57.1502	16.578	2.47299	1.748	0.311987	1.1342	0.193656	192.6	54.4265	0.99	0.465016	2.67	0.961332	92.8836	60.3445	2.13e-07	3.61e-07	8.01595	11.3201	1117.52	1263.43	429.462	632.61	92.76	75.7382	3.4712	4.34419
471	Ac1Cr1O3	Pm-3m	221	cubic	1.051	4.97277	-3.119	109.192	5	4.77966	4.77966	4.77966	90	90	90	27.4	31.4172	11.4	5.71314	3.8	2.71293	65.3989	81.9945	16.372	4.99344	1.818	0.387319	1.196	0.128	195.6	57.1265	1.046	0.545586	2.614	1.02757	104.2	46.0648	2.54e-08	5.08e-08	21.2159	36.6863	1357.52	1564.84	733.48	874.274	92.76	75.7382	7.0332	8.59149
472	Ac1Cr1O3	Pm-3m	221	cubic	1.202	8.65825	-3.119	62.7132	5	3.97301	3.97301	3.97301	90	90	90	27.4	31.4172	11.4	5.71314	3.8	2.71293	65.3989	81.9945	16.372	4.99344	1.818	0.387319	1.196	0.128	195.6	57.1265	1.046	0.545586	2.614	1.02757	104.2	46.0648	2.54e-08	5.08e-08	21.2159	36.6863	1357.52	1564.84	733.48	874.274	92.76	75.7382	7.0332	8.59149
473	Ac1Cr1O3	Pm-3m	221	cubic	1.672	8.76664	-3.119	61.9379	5	3.95657	3.95657	3.95657	90	90	90	27.4	31.4172	11.4	5.71314	3.8	2.71293	65.3989	81.9945	16.372	4.99344	1.818	0.387319	1.196	0.128	195.6	57.1265	1.046	0.545586	2.614	1.02757	104.2	46.0648	2.54e-08	5.08e-08	21.2159	36.6863	1357.52	1564.84	733.48	874.274	92.76	75.7382	7.0332	8.59149
474	Ba1Hf1O3	Pm-3m	221	cubic	0.69	4.15524	-3.625	145.39	5	5.25829	5.25829	5.25829	90	90	90	30.4	27.897	10.8	6.4	3.6	1.95959	72.763	70.7291	20.736	8.8433	1.894	0.47965	1.224	0.207133	201.2	64.6696	1.124	0.607473	2.506	1.15197	87.6466	65.4364	1.36e-07	1.67e-07	8.21595	10.1537	1457.92	1884.92	734.08	958.611	92.76	75.7382	6.8332	9.80749
475	Ba1Hf1O3	Pm-3m	221	cubic	3.134	4.15524	-3.625	145.39	5	5.25829	5.25829	5.25829	90	90	90	30.4	27.897	10.8	6.4	3.6	1.95959	72.763	70.7291	20.736	8.8433	1.894	0.47965	1.224	0.207133	201.2	64.6696	1.124	0.607473	2.506	1.15197	87.6466	65.4364	1.36e-07	1.67e-07	8.21595	10.1537	1457.92	1884.92	734.08	958.611	92.76	75.7382	6.8332	9.80749
476	Ba1Hf1O3	Pm-3m	221	cubic	3.277	8.15153	-3.625	74.1124	5	4.20046	4.20046	4.20046	90	90	90	30.4	27.897	10.8	6.4	3.6	1.95959	72.763	70.7291	20.736	8.8433	1.894	0.47965	1.224	0.207133	201.2	64.6696	1.124	0.607473	2.506	1.15197	87.6466	65.4364	1.36e-07	1.67e-07	8.21595	10.1537	1457.92	1884.92	734.08	958.611	92.76	75.7382	6.8332	9.80749
477	Ba1Hf1O3	Pm-3m	221	cubic	3.701	8.30442	-3.625	72.7479	5	4.17452	4.17452	4.17452	90	90	90	30.4	27.897	10.8	6.4	3.6	1.95959	72.763	70.7291	20.736	8.8433	1.894	0.47965	1.224	0.207133	201.2	64.6696	1.124	0.607473	2.506	1.15197	87.6466	65.4364	1.36e-07	1.67e-07	8.21595	10.1537	1457.92	1884.92	734.08	958.611	92.76	75.7382	6.8332	9.80749
478	Dy1In1O3	Pm-3m	221	cubic	1.323	4.60437	-2.146	117.323	5	4.89547	4.89547	4.89547	90	90	90	27.8	24.8387	14.6	1.74356	3.8	2.4	65.0632	61.9536	17.37	1.02781	1.76	0.317553	1.1702	0.125476	194.8	56.169	1.028	0.490159	2.664	0.96676	90.3656	62.6549	2.01e-07	3.64e-07	18.6159	31.9757	1091.12	1235.83	454.83	629.562	92.76	75.7382	3.0052	4.21496
479	Dy1In1O3	Pm-3m	221	cubic	1.331	7.81313	-2.146	69.14	5	4.10434	4.10434	4.10434	90	90	90	27.8	24.8387	14.6	1.74356	3.8	2.4	65.0632	61.9536	17.37	1.02781	1.76	0.317553	1.1702	0.125476	194.8	56.169	1.028	0.490159	2.664	0.96676	90.3656	62.6549	2.01e-07	3.64e-07	18.6159	31.9757	1091.12	1235.83	454.83	629.562	92.76	75.7382	3.0052	4.21496
480	Dy1In1O3	Pm-3m	221	cubic	1.649	7.89665	-2.146	68.4087	5	4.08982	4.08982	4.08982	90	90	90	27.8	24.8387	14.6	1.74356	3.8	2.4	65.0632	61.9536	17.37	1.02781	1.76	0.317553	1.1702	0.125476	194.8	56.169	1.028	0.490159	2.664	0.96676	90.3656	62.6549	2.01e-07	3.64e-07	18.6159	31.9757	1091.12	1235.83	454.83	629.562	92.76	75.7382	3.0052	4.21496
481	La1Nd1O3	Pm-3m	221	cubic	1.051	6.15569	-2.871	89.3288	5	4.47024	4.47024	4.47024	90	90	90	28.2	24.758	11.4	5.71314	4.4	2.93939	66.2291	61.5418	19.012	2.10182	1.876	0.436193	1.2457	0.0374	208.6	71.7763	1.148	0.62246	2.512	1.13663	93.6556	59.7034	2.52e-07	3.08e-07	6.01595	7.44371	1477.32	1702.89	530.88	584.003	92.76	75.7382	2.7932	3.1619
482	Nd1Dy1O3	Pm-3m	221	cubic	0.55	6.72958	-2.487	87.533	5	4.44008	4.44008	4.44008	90	90	90	30	27.0111	13.2	3.91918	4.4	2.93939	70.948	67.5453	18.336	1.29557	1.852	0.407402	1.2375	0.0536321	205.2	67.7507	1.12	0.588422	2.536	1.10746	84.5856	69.0639	3.14e-07	3.95e-07	5.61595	7.10363	1296.72	1487.26	628.28	712.733	92.76	75.7382	3.7732	4.52952
483	Er1Al1O3	Pm-3m	221	cubic	2.889	3.76191	-3.435	106.926	5	4.74637	4.74637	4.74637	90	90	90	21	23.5797	15	1.26491	3.4	2.33238	48.4477	59.5577	16.108	3.08357	1.738	0.302549	1.097	0.229033	190.8	52.8068	0.986	0.455702	2.634	0.994054	92.938	60.2983	1.77e-07	3.41e-07	50.0159	92.6736	1240.72	1413.41	579.974	699.39	92.76	75.7382	6.2532	7.93896
484	Er1Al1O3	Pm-3m	221	cubic	2.86	7.99851	-3.435	50.2902	5	3.69115	3.69115	3.69115	90	90	90	21	23.5797	15	1.26491	3.4	2.33238	48.4477	59.5577	16.108	3.08357	1.738	0.302549	1.097	0.229033	190.8	52.8068	0.986	0.455702	2.634	0.994054	92.938	60.2983	1.77e-07	3.41e-07	50.0159	92.6736	1240.72	1413.41	579.974	699.39	92.76	75.7382	6.2532	7.93896
485	Er1Al1O3	Pm-3m	221	cubic	3.175	8.14254	-3.435	49.4007	5	3.66925	3.66925	3.66925	90	90	90	21	23.5797	15	1.26491	3.4	2.33238	48.4477	59.5577	16.108	3.08357	1.738	0.302549	1.097	0.229033	190.8	52.8068	0.986	0.455702	2.634	0.994054	92.938	60.2983	1.77e-07	3.41e-07	50.0159	92.6736	1240.72	1413.41	579.974	699.39	92.76	75.7382	6.2532	7.93896
486	Eu1Ge1O3	Pm-3m	221	cubic	0.94	3.46959	-2.693	130.467	5	5.07185	5.07185	5.07185	90	90	90	23.8	21.6924	14.2	2.71293	3.6	2.33238	54.5204	53.4325	18.936	5.22085	1.804	0.356011	1.1497	0.191338	192.4	54.6648	0.99	0.472694	2.704	0.937968	125.046	22.5214	0.00010018	0.00019991	14.8159	23.2312	1032.72	1224.62	494.96	540.254	92.76	75.7382	8.3332	12.2378
487	Eu1Ge1O3	Pm-3m	221	cubic	1.165	8.38406	-2.693	53.9913	5	3.77956	3.77956	3.77956	90	90	90	23.8	21.6924	14.2	2.71293	3.6	2.33238	54.5204	53.4325	18.936	5.22085	1.804	0.356011	1.1497	0.191338	192.4	54.6648	0.99	0.472694	2.704	0.937968	125.046	22.5214	0.00010018	0.00019991	14.8159	23.2312	1032.72	1224.62	494.96	540.254	92.76	75.7382	8.3332	12.2378
488	Eu1Ge1O3	Pm-3m	221	cubic	1.181	8.59918	-2.693	52.6407	5	3.74778	3.74778	3.74778	90	90	90	23.8	21.6924	14.2	2.71293	3.6	2.33238	54.5204	53.4325	18.936	5.22085	1.804	0.356011	1.1497	0.191338	192.4	54.6648	0.99	0.472694	2.704	0.937968	125.046	22.5214	0.00010018	0.00019991	14.8159	23.2312	1032.72	1224.62	494.96	540.254	92.76	75.7382	8.3332	12.2378
489	Ca1Hf1O3	Pm-3m	221	cubic	0.397	3.53657	-3.51	125.162	5	5.00216	5.00216	5.00216	90	90	90	23.2	24.8387	10.8	6.4	3.2	1.6	53.3132	63.2793	18.344	4.21119	1.82	0.368293	1.154	0.158947	193	52.7409	1.06	0.515364	2.53	1.11882	85.3298	68.1532	7.48e-08	1.33e-07	44.6159	78.1999	1380.72	1863.06	757.08	966.066	92.76	75.7382	6.9412	9.82271
490	Ca1Hf1O3	Pm-3m	221	cubic	3.237	3.53657	-3.51	125.162	5	5.00216	5.00216	5.00216	90	90	90	23.2	24.8387	10.8	6.4	3.2	1.6	53.3132	63.2793	18.344	4.21119	1.82	0.368293	1.154	0.158947	193	52.7409	1.06	0.515364	2.53	1.11882	85.3298	68.1532	7.48e-08	1.33e-07	44.6159	78.1999	1380.72	1863.06	757.08	966.066	92.76	75.7382	6.9412	9.82271
491	Ca1Hf1O3	Pm-3m	221	cubic	3.359	6.45237	-3.51	68.6017	5	4.09366	4.09366	4.09366	90	90	90	23.2	24.8387	10.8	6.4	3.2	1.6	53.3132	63.2793	18.344	4.21119	1.82	0.368293	1.154	0.158947	193	52.7409	1.06	0.515364	2.53	1.11882	85.3298	68.1532	7.48e-08	1.33e-07	44.6159	78.1999	1380.72	1863.06	757.08	966.066	92.76	75.7382	6.9412	9.82271
492	Ca1Hf1O3	Pm-3m	221	cubic	3.748	6.54834	-3.51	67.5963	5	4.07356	4.07356	4.07356	90	90	90	23.2	24.8387	10.8	6.4	3.2	1.6	53.3132	63.2793	18.344	4.21119	1.82	0.368293	1.154	0.158947	193	52.7409	1.06	0.515364	2.53	1.11882	85.3298	68.1532	7.48e-08	1.33e-07	44.6159	78.1999	1380.72	1863.06	757.08	966.066	92.76	75.7382	6.9412	9.82271
493	La1Nd1O3	Pm-3m	221	cubic	0.514	5.97668	-2.638	92.0044	5	4.51443	4.51443	4.51443	90	90	90	28.2	24.758	11.4	5.71314	4.4	2.93939	66.2291	61.5418	19.012	2.10182	1.876	0.436193	1.2457	0.0374	208.6	71.7763	1.148	0.62246	2.512	1.13663	93.6556	59.7034	2.52e-07	3.08e-07	6.01595	7.44371	1477.32	1702.89	530.88	584.003	92.76	75.7382	2.7932	3.1619
494	Gd1Al1O3	Pm-3m	221	cubic	2.643	3.52608	-3.479	109.364	5	4.78217	4.78217	4.78217	90	90	90	20.2	21.9854	14.2	2.4	3.4	2.33238	46.4459	55.5651	16.396	3.34588	1.748	0.320899	1.106	0.227099	190.8	52.8068	0.996	0.473016	2.628	1.0025	92.938	60.2983	2.67e-07	5.21e-07	49.2159	92.9892	1317.12	1520.34	536.574	624.987	92.76	75.7382	4.2732	4.96662
495	Gd1Al1O3	Pm-3m	221	cubic	2.772	7.45564	-3.479	51.7228	5	3.72587	3.72587	3.72587	90	90	90	20.2	21.9854	14.2	2.4	3.4	2.33238	46.4459	55.5651	16.396	3.34588	1.748	0.320899	1.106	0.227099	190.8	52.8068	0.996	0.473016	2.628	1.0025	92.938	60.2983	2.67e-07	5.21e-07	49.2159	92.9892	1317.12	1520.34	536.574	624.987	92.76	75.7382	4.2732	4.96662
496	Gd1Al1O3	Pm-3m	221	cubic	3.001	7.62258	-3.479	50.59	5	3.69847	3.69847	3.69847	90	90	90	20.2	21.9854	14.2	2.4	3.4	2.33238	46.4459	55.5651	16.396	3.34588	1.748	0.320899	1.106	0.227099	190.8	52.8068	0.996	0.473016	2.628	1.0025	92.938	60.2983	2.67e-07	5.21e-07	49.2159	92.9892	1317.12	1520.34	536.574	624.987	92.76	75.7382	4.2732	4.96662
497	Lu1Ga1O3	Pm-3m	221	cubic	2.824	4.46666	-2.59	108.811	5	4.77409	4.77409	4.77409	90	90	90	25.2	24.5715	15.6	1.35647	3.6	2.33238	58.5376	61.8214	16.332	2.27183	1.734	0.287026	1.1082	0.20093	189	48.7606	0.978	0.44427	2.68	0.94634	99.4456	50.9382	1.44e-07	2.25e-07	9.01595	11.7522	1284.52	1511	478.462	729.624	92.76	75.7382	5.6512	8.43464
498	Lu1Ga1O3	Pm-3m	221	cubic	2.791	8.78486	-2.59	55.3248	5	3.81042	3.81042	3.81042	90	90	90	25.2	24.5715	15.6	1.35647	3.6	2.33238	58.5376	61.8214	16.332	2.27183	1.734	0.287026	1.1082	0.20093	189	48.7606	0.978	0.44427	2.68	0.94634	99.4456	50.9382	1.44e-07	2.25e-07	9.01595	11.7522	1284.52	1511	478.462	729.624	92.76	75.7382	5.6512	8.43464
499	Lu1Ga1O3	Pm-3m	221	cubic	3.196	9.02716	-2.59	53.8398	5	3.77602	3.77602	3.77602	90	90	90	25.2	24.5715	15.6	1.35647	3.6	2.33238	58.5376	61.8214	16.332	2.27183	1.734	0.287026	1.1082	0.20093	189	48.7606	0.978	0.44427	2.68	0.94634	99.4456	50.9382	1.44e-07	2.25e-07	9.01595	11.7522	1284.52	1511	478.462	729.624	92.76	75.7382	5.6512	8.43464
500	Ac1Ga1O3	Pm-3m	221	cubic	2.84	4.9045	-2.904	116.714	5	4.88698	4.88698	4.88698	90	90	90	28.8	31.3904	12.8	5.03587	3.8	2.71293	68.9442	81.7211	17.286	3.40066	1.78	0.370675	1.16	0.2	193	55.0781	1.032	0.539756	2.644	1.00113	99.6376	50.6878	2.8e-08	5.6e-08	8.21595	11.3797	1264.12	1478.94	358.062	491.945	92.76	75.7382	4.0512	5.39138
501	Ac1Ga1O3	Pm-3m	221	cubic	2.968	9.12607	-2.904	62.724	5	3.97324	3.97324	3.97324	90	90	90	28.8	31.3904	12.8	5.03587	3.8	2.71293	68.9442	81.7211	17.286	3.40066	1.78	0.370675	1.16	0.2	193	55.0781	1.032	0.539756	2.644	1.00113	99.6376	50.6878	2.8e-08	5.6e-08	8.21595	11.3797	1264.12	1478.94	358.062	491.945	92.76	75.7382	4.0512	5.39138
502	Ac1Ga1O3	Pm-3m	221	cubic	3.278	9.28886	-2.904	61.6247	5	3.94989	3.94989	3.94989	90	90	90	28.8	31.3904	12.8	5.03587	3.8	2.71293	68.9442	81.7211	17.286	3.40066	1.78	0.370675	1.16	0.2	193	55.0781	1.032	0.539756	2.644	1.00113	99.6376	50.6878	2.8e-08	5.6e-08	8.21595	11.3797	1264.12	1478.94	358.062	491.945	92.76	75.7382	4.0512	5.39138
503	Co1Bi1O3	Pm-3m	221	cubic	0.269	9.78025	-1.127	53.6371	5	3.77128	3.77128	3.77128	90	90	90	26.8	29.0475	14.4	2.72764	3.2	1.6	63.1824	74.7714	16.012	4.91514	1.726	0.253267	1.11667	0.194751	194	55.3534	0.92	0.357547	2.844	0.731289	115.545	32.2998	2.72e-07	5.15e-07	21.6159	39.3135	1061.52	1265.29	495.36	663.972	92.76	75.7382	5.5532	6.74103
504	La1Lu1O3	Pm-3m	221	cubic	1.55	4.74119	-3.465	126.74	5	5.0231	5.0231	5.0231	90	90	90	30.4	27.7892	13.6	5.31413	4.4	2.93939	72.3741	69.9801	18.45	1.9767	1.846	0.403762	1.1906	0.10074	202.2	64.8827	1.12	0.59127	2.538	1.10603	100.218	50.0759	2.39e-07	2.93e-07	5.81595	7.15368	1537.72	1772.97	656.48	772.406	92.76	75.7382	5.7732	8.43728
505	La1Lu1O3	Pm-3m	221	cubic	1.549	8.03814	-3.465	74.7562	5	4.21259	4.21259	4.21259	90	90	90	30.4	27.7892	13.6	5.31413	4.4	2.93939	72.3741	69.9801	18.45	1.9767	1.846	0.403762	1.1906	0.10074	202.2	64.8827	1.12	0.59127	2.538	1.10603	100.218	50.0759	2.39e-07	2.93e-07	5.81595	7.15368	1537.72	1772.97	656.48	772.406	92.76	75.7382	5.7732	8.43728
506	La1Lu1O3	Pm-3m	221	cubic	2.404	8.14324	-3.465	73.7913	5	4.19439	4.19439	4.19439	90	90	90	30.4	27.7892	13.6	5.31413	4.4	2.93939	72.3741	69.9801	18.45	1.9767	1.846	0.403762	1.1906	0.10074	202.2	64.8827	1.12	0.59127	2.538	1.10603	100.218	50.0759	2.39e-07	2.93e-07	5.81595	7.15368	1537.72	1772.97	656.48	772.406	92.76	75.7382	5.7732	8.43728
507	La1Er1O3	Pm-3m	221	cubic	1.293	4.59997	-3.342	127.849	5	5.0377	5.0377	5.0377	90	90	90	29.8	26.9251	13	5.05964	4.4	2.93939	70.8325	67.7525	18.586	1.94913	1.856	0.413889	1.1964	0.0899102	205.4	68.1164	1.126	0.597649	2.532	1.11295	93.6556	59.7034	2.95e-07	3.7e-07	5.61595	6.8747	1430.92	1653.04	631.88	732.544	92.76	75.7382	5.3532	7.63301
508	La1Er1O3	Pm-3m	221	cubic	1.162	7.58528	-3.342	77.5318	5	4.26409	4.26409	4.26409	90	90	90	29.8	26.9251	13	5.05964	4.4	2.93939	70.8325	67.7525	18.586	1.94913	1.856	0.413889	1.1964	0.0899102	205.4	68.1164	1.126	0.597649	2.532	1.11295	93.6556	59.7034	2.95e-07	3.7e-07	5.61595	6.8747	1430.92	1653.04	631.88	732.544	92.76	75.7382	5.3532	7.63301
509	La1Er1O3	Pm-3m	221	cubic	2.016	7.64072	-3.342	76.9693	5	4.25375	4.25375	4.25375	90	90	90	29.8	26.9251	13	5.05964	4.4	2.93939	70.8325	67.7525	18.586	1.94913	1.856	0.413889	1.1964	0.0899102	205.4	68.1164	1.126	0.597649	2.532	1.11295	93.6556	59.7034	2.95e-07	3.7e-07	5.61595	6.8747	1430.92	1653.04	631.88	732.544	92.76	75.7382	5.3532	7.63301
510	La1Ce1O3	Pm-3m	221	cubic	0.543	5.77651	-2.7	94.0064	5	4.54694	4.54694	4.54694	90	90	90	27.8	24.252	11	6.13188	4.4	2.93939	65.4039	60.5092	19.032	2.11716	1.882	0.443369	1.2064	0.0718042	207.2	70.1267	1.14	0.613188	2.508	1.14148	106.2	42.9449	2.71e-07	3.34e-07	4.81595	5.89975	1529.32	1762.9	485.08	528.464	92.76	75.7382	2.4732	2.76602
511	Gd1Er1O3	Pm-3m	221	cubic	1.249	5.01312	-3.062	123.389	5	4.97842	4.97842	4.97842	90	90	90	31.2	28.4422	14.4	2.33238	4.4	2.93939	74.5014	71.7199	18.088	1.00117	1.838	0.38979	1.177	0.102645	201.6	63.1968	1.102	0.566053	2.554	1.08517	84.5856	69.0639	4.34e-07	5.5e-07	5.21595	6.4803	1386.92	1592.74	710.28	805.723	92.76	75.7382	6.1132	7.86514
512	Gd1Er1O3	Pm-3m	221	cubic	1.249	8.17926	-3.062	75.6257	5	4.22886	4.22886	4.22886	90	90	90	31.2	28.4422	14.4	2.33238	4.4	2.93939	74.5014	71.7199	18.088	1.00117	1.838	0.38979	1.177	0.102645	201.6	63.1968	1.102	0.566053	2.554	1.08517	84.5856	69.0639	4.34e-07	5.5e-07	5.21595	6.4803	1386.92	1592.74	710.28	805.723	92.76	75.7382	6.1132	7.86514
513	Gd1Er1O3	Pm-3m	221	cubic	1.787	8.23829	-3.062	75.0838	5	4.21873	4.21873	4.21873	90	90	90	31.2	28.4422	14.4	2.33238	4.4	2.93939	74.5014	71.7199	18.088	1.00117	1.838	0.38979	1.177	0.102645	201.6	63.1968	1.102	0.566053	2.554	1.08517	84.5856	69.0639	4.34e-07	5.5e-07	5.21595	6.4803	1386.92	1592.74	710.28	805.723	92.76	75.7382	6.1132	7.86514
514	Gd1Ho1O3	Pm-3m	221	cubic	0.778	4.96151	-2.759	123.893	5	4.98519	4.98519	4.98519	90	90	90	31	28.1851	14.2	2.4	4.4	2.93939	74.0357	71.1211	18.144	1.02788	1.84	0.392122	1.1792	0.0995417	202.4	64.1891	1.106	0.57081	2.552	1.08759	84.5856	69.0639	4.25e-07	5.43e-07	5.41595	6.78734	1357.32	1560.92	696.68	787.55	92.76	75.7382	5.5332	6.87119
515	Gd1Ho1O3	Pm-3m	221	cubic	0.667	7.68207	-2.759	80.017	5	4.30917	4.30917	4.30917	90	90	90	31	28.1851	14.2	2.4	4.4	2.93939	74.0357	71.1211	18.144	1.02788	1.84	0.392122	1.1792	0.0995417	202.4	64.1891	1.106	0.57081	2.552	1.08759	84.5856	69.0639	4.25e-07	5.43e-07	5.41595	6.78734	1357.32	1560.92	696.68	787.55	92.76	75.7382	5.5332	6.87119
516	Gd1Ho1O3	Pm-3m	221	cubic	0.973	7.7132	-2.759	79.694	5	4.30337	4.30337	4.30337	90	90	90	31	28.1851	14.2	2.4	4.4	2.93939	74.0357	71.1211	18.144	1.02788	1.84	0.392122	1.1792	0.0995417	202.4	64.1891	1.106	0.57081	2.552	1.08759	84.5856	69.0639	4.25e-07	5.43e-07	5.41595	6.78734	1357.32	1560.92	696.68	787.55	92.76	75.7382	5.5332	6.87119
517	Ho1Er1O3	Pm-3m	221	cubic	1.026	5.19795	-2.897	121.455	5	4.95228	4.95228	4.95228	90	90	90	31.8	29.1506	15	1.26491	4.4	2.93939	76.0375	73.535	17.856	0.613892	1.83	0.379684	1.1702	0.110037	202.4	64.1891	1.096	0.558519	2.558	1.08023	84.5856	69.0639	3.35e-07	4.1e-07	6.21595	7.58699	1280.92	1459.08	740.08	839.569	92.76	75.7382	7.5132	8.97683
518	Ho1Er1O3	Pm-3m	221	cubic	1.026	8.32594	-2.897	75.8252	5	4.23257	4.23257	4.23257	90	90	90	31.8	29.1506	15	1.26491	4.4	2.93939	76.0375	73.535	17.856	0.613892	1.83	0.379684	1.1702	0.110037	202.4	64.1891	1.096	0.558519	2.558	1.08023	84.5856	69.0639	3.35e-07	4.1e-07	6.21595	7.58699	1280.92	1459.08	740.08	839.569	92.76	75.7382	7.5132	8.97683
519	Ho1Er1O3	Pm-3m	221	cubic	1.36	8.36381	-2.897	75.4819	5	4.22618	4.22618	4.22618	90	90	90	31.8	29.1506	15	1.26491	4.4	2.93939	76.0375	73.535	17.856	0.613892	1.83	0.379684	1.1702	0.110037	202.4	64.1891	1.096	0.558519	2.558	1.08023	84.5856	69.0639	3.35e-07	4.1e-07	6.21595	7.58699	1280.92	1459.08	740.08	839.569	92.76	75.7382	7.5132	8.97683
520	Lu1Co1O3	Pm-3m	221	cubic	0.806	9.51324	-2.221	49.2055	5	3.66441	3.66441	3.66441	90	90	90	24.4	24.4344	14.8	2.92575	3.6	2.33238	56.3797	61.5811	15.306	4.32106	1.76	0.303579	1.10987	0.198049	190.6	50.2538	0.968	0.439017	2.694	0.933801	103.922	46.4324	1.28e-07	2.27e-07	23.2159	38.8873	1429.12	1646.7	771.48	879.153	92.76	75.7382	7.7732	9.42841
521	La1Co1O3	Pm-3m	221	cubic	0.418	8.01396	-2.42	50.9388	5	3.70695	3.70695	3.70695	90	90	90	21.6	19.1687	12	5.25357	3.6	2.33238	49.1674	47.8511	16.228	5.16081	1.798	0.366628	1.14407	0.190933	197.6	61.115	1.008	0.51078	2.66	0.986631	106.43	42.7133	1.35e-07	2.41e-07	22.6159	39.0169	1442.72	1665.37	625.08	721.728	92.76	75.7382	4.6132	6.23891
522	Er1In1O3	Pm-3m	221	cubic	1.262	4.70883	-2.095	116.399	5	4.88258	4.88258	4.88258	90	90	90	28.2	25.459	15	1.26491	3.8	2.4	66.015	63.4614	17.26	0.862554	1.756	0.310651	1.15	0.137695	194.4	55.5575	1.022	0.480766	2.668	0.9608	90.3656	62.6549	1.88e-07	3.37e-07	19.4159	31.8249	1151.32	1323.75	479.23	677.14	92.76	75.7382	4.7652	7.65833
523	Er1In1O3	Pm-3m	221	cubic	1.264	7.99064	-2.095	68.5931	5	4.09349	4.09349	4.09349	90	90	90	28.2	25.459	15	1.26491	3.8	2.4	66.015	63.4614	17.26	0.862554	1.756	0.310651	1.15	0.137695	194.4	55.5575	1.022	0.480766	2.668	0.9608	90.3656	62.6549	1.88e-07	3.37e-07	19.4159	31.8249	1151.32	1323.75	479.23	677.14	92.76	75.7382	4.7652	7.65833
524	Er1In1O3	Pm-3m	221	cubic	1.424	8.05295	-2.095	68.0624	5	4.0829	4.0829	4.0829	90	90	90	28.2	25.459	15	1.26491	3.8	2.4	66.015	63.4614	17.26	0.862554	1.756	0.310651	1.15	0.137695	194.4	55.5575	1.022	0.480766	2.668	0.9608	90.3656	62.6549	1.88e-07	3.37e-07	19.4159	31.8249	1151.32	1323.75	479.23	677.14	92.76	75.7382	4.7652	7.65833
528	Ac1Nd1O3	Pm-3m	221	cubic	0.299	5.30242	-3.029	131.292	5	5.08252	5.08252	5.08252	90	90	90	34.6	33.8443	11.4	5.71314	4.6	3.2	83.848	87.1209	19.044	2.15359	1.884	0.446524	1.2633	0.0066	205.6	68.2015	1.162	0.640637	2.51	1.13912	91.3396	61.7228	1.29e-07	2.57e-07	5.81595	7.26465	1443.32	1658.43	556.88	614.975	92.76	75.7382	4.3532	5.5101
529	Ac1Nd1O3	Pm-3m	221	cubic	1.498	5.30242	-3.029	131.292	5	5.08252	5.08252	5.08252	90	90	90	34.6	33.8443	11.4	5.71314	4.6	3.2	83.848	87.1209	19.044	2.15359	1.884	0.446524	1.2633	0.0066	205.6	68.2015	1.162	0.640637	2.51	1.13912	91.3396	61.7228	1.29e-07	2.57e-07	5.81595	7.26465	1443.32	1658.43	556.88	614.975	92.76	75.7382	4.3532	5.5101
530	Ac1Nd1O3	Pm-3m	221	cubic	1.48	7.69663	-3.029	90.4506	5	4.48887	4.48887	4.48887	90	90	90	34.6	33.8443	11.4	5.71314	4.6	3.2	83.848	87.1209	19.044	2.15359	1.884	0.446524	1.2633	0.0066	205.6	68.2015	1.162	0.640637	2.51	1.13912	91.3396	61.7228	1.29e-07	2.57e-07	5.81595	7.26465	1443.32	1658.43	556.88	614.975	92.76	75.7382	4.3532	5.5101
531	Ac1Nd1O3	Pm-3m	221	cubic	1.915	7.66657	-3.029	90.8053	5	4.49473	4.49473	4.49473	90	90	90	34.6	33.8443	11.4	5.71314	4.6	3.2	83.848	87.1209	19.044	2.15359	1.884	0.446524	1.2633	0.0066	205.6	68.2015	1.162	0.640637	2.51	1.13912	91.3396	61.7228	1.29e-07	2.57e-07	5.81595	7.26465	1443.32	1658.43	556.88	614.975	92.76	75.7382	4.3532	5.5101
532	Nd1Ho1O3	Pm-3m	221	cubic	0.461	6.78331	-2.456	87.4346	5	4.43841	4.43841	4.43841	90	90	90	30.2	27.2793	13.4	3.87814	4.4	2.93939	71.4341	68.2078	18.282	1.27176	1.85	0.405167	1.2195	0.0894785	205.6	68.2015	1.118	0.586119	2.538	1.10509	84.5856	69.0639	2.91e-07	3.61e-07	6.61595	8.07649	1327.32	1519.91	639.08	728.815	92.76	75.7382	4.9532	6.58615
533	Er1Bi1O3	Pm-3m	221	cubic	0.253	9.15989	-2.085	76.9074	5	4.25261	4.25261	4.25261	90	90	90	35	33.4066	15.4	0.8	4	2.52982	84.8475	85.3473	18.37	1.53049	1.784	0.330733	1.169	0.111463	201.8	63.4426	1.038	0.49487	2.716	0.920383	102.77	54.9201	4.32e-07	5.47e-07	4.61595	6.04098	1049.72	1245.42	502.16	677.017	92.76	75.7382	6.2932	7.96173
534	Mn1Ge1O3	Pm-3m	221	cubic	0.84	3.08159	-1.667	94.6107	5	4.55666	4.55666	4.55666	90	90	90	16.2	10.284	13.8	3.48712	2.8	0.979796	35.1152	24.072	14.612	3.90782	1.744	0.274998	1.03967	0.272581	184.8	42.9204	0.882	0.297752	2.776	0.826138	108.373	54.8547	0.000100288	0.000199857	13.5759	23.4065	1139.52	1307.37	578.96	649.29	92.76	75.7382	9.1332	12.398
535	Mn1Ge1O3	Pm-3m	221	cubic	1.127	5.59517	-1.667	52.1076	5	3.73509	3.73509	3.73509	90	90	90	16.2	10.284	13.8	3.48712	2.8	0.979796	35.1152	24.072	14.612	3.90782	1.744	0.274998	1.03967	0.272581	184.8	42.9204	0.882	0.297752	2.776	0.826138	108.373	54.8547	0.000100288	0.000199857	13.5759	23.4065	1139.52	1307.37	578.96	649.29	92.76	75.7382	9.1332	12.398
536	Mn1Ge1O3	Pm-3m	221	cubic	1.27	5.72574	-1.667	50.9194	5	3.70647	3.70647	3.70647	90	90	90	16.2	10.284	13.8	3.48712	2.8	0.979796	35.1152	24.072	14.612	3.90782	1.744	0.274998	1.03967	0.272581	184.8	42.9204	0.882	0.297752	2.776	0.826138	108.373	54.8547	0.000100288	0.000199857	13.5759	23.4065	1139.52	1307.37	578.96	649.29	92.76	75.7382	9.1332	12.398
537	Ce1Gd1O3	Pm-3m	221	cubic	0.425	6.18738	-2.371	92.6871	5	4.52557	4.52557	4.52557	90	90	90	29.2	26.0338	12.4	4.8	4.4	2.93939	69.0728	65.2269	18.534	1.45939	1.864	0.422071	1.187	0.0894204	203.4	65.4633	1.116	0.583013	2.53	1.11488	97.1296	57.2463	4.1e-07	5.34e-07	4.41595	5.37586	1485.32	1709.02	563.48	644.098	92.76	75.7382	3.2332	3.95297
538	Nd1Ho1O3	Pm-3m	221	cubic	0.349	4.74472	-3.137	125.001	5	5.00002	5.00002	5.00002	90	90	90	30.2	27.2793	13.4	3.87814	4.4	2.93939	71.4341	68.2078	18.282	1.27176	1.85	0.405167	1.2195	0.0894785	205.6	68.2015	1.118	0.586119	2.538	1.10509	84.5856	69.0639	2.91e-07	3.61e-07	6.61595	8.07649	1327.32	1519.91	639.08	728.815	92.76	75.7382	4.9532	6.58615
539	Nd1Ho1O3	Pm-3m	221	cubic	1.263	4.74472	-3.137	125.001	5	5.00002	5.00002	5.00002	90	90	90	30.2	27.2793	13.4	3.87814	4.4	2.93939	71.4341	68.2078	18.282	1.27176	1.85	0.405167	1.2195	0.0894785	205.6	68.2015	1.118	0.586119	2.538	1.10509	84.5856	69.0639	2.91e-07	3.61e-07	6.61595	8.07649	1327.32	1519.91	639.08	728.815	92.76	75.7382	4.9532	6.58615
540	Nd1Ho1O3	Pm-3m	221	cubic	1.106	7.62047	-3.137	77.8293	5	4.26954	4.26954	4.26954	90	90	90	30.2	27.2793	13.4	3.87814	4.4	2.93939	71.4341	68.2078	18.282	1.27176	1.85	0.405167	1.2195	0.0894785	205.6	68.2015	1.118	0.586119	2.538	1.10509	84.5856	69.0639	2.91e-07	3.61e-07	6.61595	8.07649	1327.32	1519.91	639.08	728.815	92.76	75.7382	4.9532	6.58615
541	Nd1Ho1O3	Pm-3m	221	cubic	1.706	7.68188	-3.137	77.2071	5	4.25813	4.25813	4.25813	90	90	90	30.2	27.2793	13.4	3.87814	4.4	2.93939	71.4341	68.2078	18.282	1.27176	1.85	0.405167	1.2195	0.0894785	205.6	68.2015	1.118	0.586119	2.538	1.10509	84.5856	69.0639	2.91e-07	3.61e-07	6.61595	8.07649	1327.32	1519.91	639.08	728.815	92.76	75.7382	4.9532	6.58615
542	Nd1Er1O3	Pm-3m	221	cubic	0.349	4.79499	-3.182	124.497	5	4.99329	4.99329	4.99329	90	90	90	30.4	27.5507	13.6	3.87814	4.4	2.93939	71.8998	68.8496	18.226	1.25643	1.848	0.402959	1.2173	0.0938678	204.8	67.3065	1.114	0.58157	2.54	1.10272	84.5856	69.0639	3.01e-07	3.74e-07	6.41595	7.85086	1356.92	1553.14	652.68	749.462	92.76	75.7382	5.5332	7.66141
543	Nd1Er1O3	Pm-3m	221	cubic	1.264	4.79499	-3.182	124.497	5	4.99329	4.99329	4.99329	90	90	90	30.4	27.5507	13.6	3.87814	4.4	2.93939	71.8998	68.8496	18.226	1.25643	1.848	0.402959	1.2173	0.0938678	204.8	67.3065	1.114	0.58157	2.54	1.10272	84.5856	69.0639	3.01e-07	3.74e-07	6.41595	7.85086	1356.92	1553.14	652.68	749.462	92.76	75.7382	5.5332	7.66141
544	Nd1Er1O3	Pm-3m	221	cubic	1.266	7.77702	-3.182	76.7598	5	4.24989	4.24989	4.24989	90	90	90	30.4	27.5507	13.6	3.87814	4.4	2.93939	71.8998	68.8496	18.226	1.25643	1.848	0.402959	1.2173	0.0938678	204.8	67.3065	1.114	0.58157	2.54	1.10272	84.5856	69.0639	3.01e-07	3.74e-07	6.41595	7.85086	1356.92	1553.14	652.68	749.462	92.76	75.7382	5.5332	7.66141
545	Nd1Er1O3	Pm-3m	221	cubic	1.728	7.84557	-3.182	76.0891	5	4.23748	4.23748	4.23748	90	90	90	30.4	27.5507	13.6	3.87814	4.4	2.93939	71.8998	68.8496	18.226	1.25643	1.848	0.402959	1.2173	0.0938678	204.8	67.3065	1.114	0.58157	2.54	1.10272	84.5856	69.0639	3.01e-07	3.74e-07	6.41595	7.85086	1356.92	1553.14	652.68	749.462	92.76	75.7382	5.5332	7.66141
551	Nd1B1O3	Pm-3m	221	cubic	1.975	3.32057	-2.431	101.541	5	4.66531	4.66531	4.66531	90	90	90	17.8	21.132	13.4	3.87814	3.2	2.4	40.6102	51.8548	15.412	5.6512	1.774	0.344767	1.0933	0.34171	187.4	56.2053	0.928	0.482261	2.7	0.949947	89.9834	63.0334	200000000000	400000000000	8.81595	11.2196	1568.72	1829.6	762.08	927.921	92.76	75.7382	11.5532	19.4071
552	Nd1B1O3	Pm-3m	221	cubic	2.094	7.40432	-2.431	45.5375	5	3.571	3.571	3.571	90	90	90	17.8	21.132	13.4	3.87814	3.2	2.4	40.6102	51.8548	15.412	5.6512	1.774	0.344767	1.0933	0.34171	187.4	56.2053	0.928	0.482261	2.7	0.949947	89.9834	63.0334	200000000000	400000000000	8.81595	11.2196	1568.72	1829.6	762.08	927.921	92.76	75.7382	11.5532	19.4071
553	Nd1B1O3	Pm-3m	221	cubic	2.415	7.56795	-2.431	44.5529	5	3.54508	3.54508	3.54508	90	90	90	17.8	21.132	13.4	3.87814	3.2	2.4	40.6102	51.8548	15.412	5.6512	1.774	0.344767	1.0933	0.34171	187.4	56.2053	0.928	0.482261	2.7	0.949947	89.9834	63.0334	200000000000	400000000000	8.81595	11.2196	1568.72	1829.6	762.08	927.921	92.76	75.7382	11.5532	19.4071
554	La1In1O3	Pm-3m	221	cubic	1.472	4.06352	-2.455	123.297	5	4.97719	4.97719	4.97719	90	90	90	26	22.1901	12.8	5.03587	3.8	2.4	60.3443	54.8428	18.046	2.25867	1.784	0.359922	1.1784	0.123977	198.2	61.5415	1.056	0.535373	2.64	1.00312	99.4356	51.1416	1.39e-07	2.4e-07	19.0159	31.8903	1271.72	1513.08	357.43	442.304	92.76	75.7382	2.0252	2.39618
555	La1In1O3	Pm-3m	221	cubic	1.476	6.94686	-2.455	72.1219	5	4.16251	4.16251	4.16251	90	90	90	26	22.1901	12.8	5.03587	3.8	2.4	60.3443	54.8428	18.046	2.25867	1.784	0.359922	1.1784	0.123977	198.2	61.5415	1.056	0.535373	2.64	1.00312	99.4356	51.1416	1.39e-07	2.4e-07	19.0159	31.8903	1271.72	1513.08	357.43	442.304	92.76	75.7382	2.0252	2.39618
556	La1In1O3	Pm-3m	221	cubic	2.197	7.04533	-2.455	71.1139	5	4.14303	4.14303	4.14303	90	90	90	26	22.1901	12.8	5.03587	3.8	2.4	60.3443	54.8428	18.046	2.25867	1.784	0.359922	1.1784	0.123977	198.2	61.5415	1.056	0.535373	2.64	1.00312	99.4356	51.1416	1.39e-07	2.4e-07	19.0159	31.8903	1271.72	1513.08	357.43	442.304	92.76	75.7382	2.0252	2.39618
557	Nd1Gd1O3	Pm-3m	221	cubic	0.946	4.57196	-2.98	126.935	5	5.02567	5.02567	5.02567	90	90	90	29.6	26.4847	12.8	4.11825	4.4	2.93939	69.898	66.1401	18.514	1.4301	1.858	0.414266	1.2263	0.0759194	204.8	67.3065	1.124	0.59308	2.534	1.10984	84.5856	69.0639	3.91e-07	5.23e-07	5.61595	7.10363	1433.32	1645.66	609.28	685.176	92.76	75.7382	3.5532	4.18167
558	Nd1Gd1O3	Pm-3m	221	cubic	0.946	7.14496	-2.98	81.224	5	4.33073	4.33073	4.33073	90	90	90	29.6	26.4847	12.8	4.11825	4.4	2.93939	69.898	66.1401	18.514	1.4301	1.858	0.414266	1.2263	0.0759194	204.8	67.3065	1.124	0.59308	2.534	1.10984	84.5856	69.0639	3.91e-07	5.23e-07	5.61595	7.10363	1433.32	1645.66	609.28	685.176	92.76	75.7382	3.5532	4.18167
559	Nd1Gd1O3	Pm-3m	221	cubic	1.502	7.15746	-2.98	81.0821	5	4.32821	4.32821	4.32821	90	90	90	29.6	26.4847	12.8	4.11825	4.4	2.93939	69.898	66.1401	18.514	1.4301	1.858	0.414266	1.2263	0.0759194	204.8	67.3065	1.124	0.59308	2.534	1.10984	84.5856	69.0639	3.91e-07	5.23e-07	5.61595	7.10363	1433.32	1645.66	609.28	685.176	92.76	75.7382	3.5532	4.18167
560	K1Nb1O3	Pm-3m	221	cubic	0.905	1.95374	-2.686	152.99	5	5.34836	5.34836	5.34836	90	90	90	16.8	12.8281	10.8	6.49307	3	1.26491	36.0006	29.8262	21.77	12.3468	1.898	0.496806	1.224	0.225708	195.8	56.3503	1.096	0.575555	2.546	1.12167	111.939	37.7453	4.54e-08	6.07e-08	30.8159	40.4175	1263.92	1911.66	650.186	1055.56	537.36	844.944	5.9592	10.4523
561	K1Nb1O3	Pm-3m	221	cubic	1.056	4.47312	-2.686	66.8218	5	4.05795	4.05795	4.05795	90	90	90	16.8	12.8281	10.8	6.49307	3	1.26491	36.0006	29.8262	21.77	12.3468	1.898	0.496806	1.224	0.225708	195.8	56.3503	1.096	0.575555	2.546	1.12167	111.939	37.7453	4.54e-08	6.07e-08	30.8159	40.4175	1263.92	1911.66	650.186	1055.56	537.36	844.944	5.9592	10.4523
562	K1Nb1O3	Pm-3m	221	cubic	1.669	4.56721	-2.686	65.4452	5	4.02988	4.02988	4.02988	90	90	90	16.8	12.8281	10.8	6.49307	3	1.26491	36.0006	29.8262	21.77	12.3468	1.898	0.496806	1.224	0.225708	195.8	56.3503	1.096	0.575555	2.546	1.12167	111.939	37.7453	4.54e-08	6.07e-08	30.8159	40.4175	1263.92	1911.66	650.186	1055.56	537.36	844.944	5.9592	10.4523
563	Ce1Lu1O3	Pm-3m	221	cubic	0.632	4.87898	-3.375	123.573	5	4.9809	4.9809	4.9809	90	90	90	30.6	27.9829	13.8	4.91528	4.4	2.93939	72.6162	70.2115	18.11	1.30022	1.844	0.400879	1.1722	0.110396	200.2	61.9884	1.1	0.564269	2.542	1.10084	103.692	46.6331	2.64e-07	3.27e-07	5.41595	6.78734	1515.72	1745.95	631.48	756.495	92.76	75.7382	5.6332	8.43485
564	Ce1Lu1O3	Pm-3m	221	cubic	1.652	4.87898	-3.375	123.573	5	4.9809	4.9809	4.9809	90	90	90	30.6	27.9829	13.8	4.91528	4.4	2.93939	72.6162	70.2115	18.11	1.30022	1.844	0.400879	1.1722	0.110396	200.2	61.9884	1.1	0.564269	2.542	1.10084	103.692	46.6331	2.64e-07	3.27e-07	5.41595	6.78734	1515.72	1745.95	631.48	756.495	92.76	75.7382	5.6332	8.43485
565	Ce1Lu1O3	Pm-3m	221	cubic	1.764	8.10894	-3.375	74.3513	5	4.20497	4.20497	4.20497	90	90	90	30.6	27.9829	13.8	4.91528	4.4	2.93939	72.6162	70.2115	18.11	1.30022	1.844	0.400879	1.1722	0.110396	200.2	61.9884	1.1	0.564269	2.542	1.10084	103.692	46.6331	2.64e-07	3.27e-07	5.41595	6.78734	1515.72	1745.95	631.48	756.495	92.76	75.7382	5.6332	8.43485
566	Ce1Lu1O3	Pm-3m	221	cubic	2.049	8.18753	-3.375	73.6377	5	4.19147	4.19147	4.19147	90	90	90	30.6	27.9829	13.8	4.91528	4.4	2.93939	72.6162	70.2115	18.11	1.30022	1.844	0.400879	1.1722	0.110396	200.2	61.9884	1.1	0.564269	2.542	1.10084	103.692	46.6331	2.64e-07	3.27e-07	5.41595	6.78734	1515.72	1745.95	631.48	756.495	92.76	75.7382	5.6332	8.43485
567	Ac1Er1O3	Pm-3m	221	cubic	2.362	5.74882	-3.473	127.745	5	5.03634	5.03634	5.03634	90	90	90	36.2	35.1704	13	5.05964	4.6	3.2	88.4514	90.724	18.618	2.01163	1.864	0.42514	1.214	0.092	202.4	64.1891	1.14	0.617058	2.53	1.11553	91.3396	61.7228	1.72e-07	3.44e-07	5.41595	6.66843	1396.92	1606.22	657.88	753.991	92.76	75.7382	6.9132	8.40472
568	Ac1Er1O3	Pm-3m	221	cubic	2.367	9.26203	-3.473	79.2899	5	4.29608	4.29608	4.29608	90	90	90	36.2	35.1704	13	5.05964	4.6	3.2	88.4514	90.724	18.618	2.01163	1.864	0.42514	1.214	0.092	202.4	64.1891	1.14	0.617058	2.53	1.11553	91.3396	61.7228	1.72e-07	3.44e-07	5.41595	6.66843	1396.92	1606.22	657.88	753.991	92.76	75.7382	6.9132	8.40472
569	Ac1Er1O3	Pm-3m	221	cubic	2.828	9.32095	-3.473	78.7887	5	4.28701	4.28701	4.28701	90	90	90	36.2	35.1704	13	5.05964	4.6	3.2	88.4514	90.724	18.618	2.01163	1.864	0.42514	1.214	0.092	202.4	64.1891	1.14	0.617058	2.53	1.11553	91.3396	61.7228	1.72e-07	3.44e-07	5.41595	6.66843	1396.92	1606.22	657.88	753.991	92.76	75.7382	6.9132	8.40472
570	La1Ce1O3	Pm-3m	221	cubic	0.475	5.85479	-2.726	92.7495	5	4.52658	4.52658	4.52658	90	90	90	27.8	24.252	11	6.13188	4.4	2.93939	65.4039	60.5092	19.032	2.11716	1.882	0.443369	1.2064	0.0718042	207.2	70.1267	1.14	0.613188	2.508	1.14148	106.2	42.9449	2.71e-07	3.34e-07	4.81595	5.89975	1529.32	1762.9	485.08	528.464	92.76	75.7382	2.4732	2.76602
571	Er1B1O3	Pm-3m	221	cubic	2.723	3.83077	-2.53	97.9948	5	4.61035	4.61035	4.61035	90	90	90	19.4	24.3278	15	1.26491	3.2	2.4	45.2136	61.0558	14.986	5.3151	1.754	0.309555	1.044	0.329278	184.2	50.1135	0.906	0.43889	2.72	0.917388	89.9834	63.0334	200000000000	400000000000	8.41595	10.9532	1522.32	1785.67	863.08	1004.94	92.76	75.7382	14.1132	19.4948
572	Er1B1O3	Pm-3m	221	cubic	2.873	9.061	-2.53	41.4297	5	3.46022	3.46022	3.46022	90	90	90	19.4	24.3278	15	1.26491	3.2	2.4	45.2136	61.0558	14.986	5.3151	1.754	0.309555	1.044	0.329278	184.2	50.1135	0.906	0.43889	2.72	0.917388	89.9834	63.0334	200000000000	400000000000	8.41595	10.9532	1522.32	1785.67	863.08	1004.94	92.76	75.7382	14.1132	19.4948
573	Er1B1O3	Pm-3m	221	cubic	3.129	9.27736	-2.53	40.4636	5	3.43311	3.43311	3.43311	90	90	90	19.4	24.3278	15	1.26491	3.2	2.4	45.2136	61.0558	14.986	5.3151	1.754	0.309555	1.044	0.329278	184.2	50.1135	0.906	0.43889	2.72	0.917388	89.9834	63.0334	200000000000	400000000000	8.41595	10.9532	1522.32	1785.67	863.08	1004.94	92.76	75.7382	14.1132	19.4948
574	Ho1Co1O3	Pm-3m	221	cubic	0.301	4.43145	-2.289	101.871	5	4.67036	4.67036	4.67036	90	90	90	23.6	22.9138	14	2.75681	3.6	2.33238	54.3723	57.7258	15.498	4.44624	1.772	0.322887	1.11787	0.194262	194.6	56.2907	0.978	0.456701	2.686	0.946057	97.3602	57.1094	1.75e-07	3.2e-07	23.2159	38.8873	1292.72	1474.23	733.28	831.034	92.76	75.7382	6.7732	8.02754
575	Ho1Co1O3	Pm-3m	221	cubic	0.455	8.79743	-2.289	51.3147	5	3.71604	3.71604	3.71604	90	90	90	23.6	22.9138	14	2.75681	3.6	2.33238	54.3723	57.7258	15.498	4.44624	1.772	0.322887	1.11787	0.194262	194.6	56.2907	0.978	0.456701	2.686	0.946057	97.3602	57.1094	1.75e-07	3.2e-07	23.2159	38.8873	1292.72	1474.23	733.28	831.034	92.76	75.7382	6.7732	8.02754
576	Ho1Co1O3	Pm-3m	221	cubic	0.909	8.97161	-2.289	50.3184	5	3.69184	3.69184	3.69184	90	90	90	23.6	22.9138	14	2.75681	3.6	2.33238	54.3723	57.7258	15.498	4.44624	1.772	0.322887	1.11787	0.194262	194.6	56.2907	0.978	0.456701	2.686	0.946057	97.3602	57.1094	1.75e-07	3.2e-07	23.2159	38.8873	1292.72	1474.23	733.28	831.034	92.76	75.7382	6.7732	8.02754
577	Nd1Ga1O3	Pm-3m	221	cubic	2.442	3.83376	-2.774	113.466	5	4.84122	4.84122	4.84122	90	90	90	23	20.5329	13.4	3.87814	3.6	2.33238	52.3926	50.4183	16.894	2.83763	1.764	0.341092	1.1633	0.201751	195.4	59.0647	1.006	0.493137	2.654	0.98569	92.8836	60.3445	1.57e-07	2.49e-07	9.21595	11.8772	1224.12	1417.37	352.862	481.75	92.76	75.7382	2.6712	3.03741
578	Nd1Ga1O3	Pm-3m	221	cubic	2.585	7.42572	-2.774	58.5802	5	3.88374	3.88374	3.88374	90	90	90	23	20.5329	13.4	3.87814	3.6	2.33238	52.3926	50.4183	16.894	2.83763	1.764	0.341092	1.1633	0.201751	195.4	59.0647	1.006	0.493137	2.654	0.98569	92.8836	60.3445	1.57e-07	2.49e-07	9.21595	11.8772	1224.12	1417.37	352.862	481.75	92.76	75.7382	2.6712	3.03741
579	Nd1Ga1O3	Pm-3m	221	cubic	2.948	7.60881	-2.774	57.1706	5	3.85234	3.85234	3.85234	90	90	90	23	20.5329	13.4	3.87814	3.6	2.33238	52.3926	50.4183	16.894	2.83763	1.764	0.341092	1.1633	0.201751	195.4	59.0647	1.006	0.493137	2.654	0.98569	92.8836	60.3445	1.57e-07	2.49e-07	9.21595	11.8772	1224.12	1417.37	352.862	481.75	92.76	75.7382	2.6712	3.03741
580	Gd1Fe1O3	Pm-3m	221	cubic	0.233	7.60667	-2.488	56.9968	5	3.84843	3.84843	3.84843	90	90	90	22.8	21.7476	13.2	3.48712	3.6	2.33238	52.2186	54.7362	15.814	4.47155	1.788	0.341667	1.1415	0.161289	194.6	55.7337	0.996	0.473016	2.672	0.96082	87.4994	65.657	2.82e-07	5.15e-07	18.2159	31.183	1385.52	1591.2	712.08	808.167	92.76	75.7382	4.8932	5.84587
581	La1B1O3	Pm-3m	221	cubic	1.702	3.12998	-2.441	104.893	5	4.71609	4.71609	4.71609	90	90	90	17.2	19.9339	12.8	5.03587	3.2	2.4	39.5429	49.7219	15.772	6.0152	1.782	0.359132	1.0724	0.332949	188	57.355	0.94	0.505964	2.692	0.963128	99.0534	51.6717	200000000000	400000000000	8.01595	10.7399	1642.72	1906.92	741.28	916.796	92.76	75.7382	11.3732	19.4517
582	La1B1O3	Pm-3m	221	cubic	1.968	6.89459	-2.441	47.6189	5	3.6246	3.6246	3.6246	90	90	90	17.2	19.9339	12.8	5.03587	3.2	2.4	39.5429	49.7219	15.772	6.0152	1.782	0.359132	1.0724	0.332949	188	57.355	0.94	0.505964	2.692	0.963128	99.0534	51.6717	200000000000	400000000000	8.01595	10.7399	1642.72	1906.92	741.28	916.796	92.76	75.7382	11.3732	19.4517
583	La1B1O3	Pm-3m	221	cubic	2.11	7.07669	-2.441	46.3936	5	3.59324	3.59324	3.59324	90	90	90	17.2	19.9339	12.8	5.03587	3.2	2.4	39.5429	49.7219	15.772	6.0152	1.782	0.359132	1.0724	0.332949	188	57.355	0.94	0.505964	2.692	0.963128	99.0534	51.6717	200000000000	400000000000	8.01595	10.7399	1642.72	1906.92	741.28	916.796	92.76	75.7382	11.3732	19.4517
584	Ce1B1O3	Pm-3m	221	cubic	1.788	3.24719	-2.358	101.726	5	4.66814	4.66814	4.66814	90	90	90	17.4	20.3332	13	4.64758	3.2	2.4	39.785	50.2057	15.432	5.66964	1.78	0.355528	1.054	0.32946	186	53.5313	0.92	0.466476	2.696	0.956527	102.527	48.4264	200000000000	400000000000	7.61595	10.5829	1620.72	1883.05	716.28	905.776	92.76	75.7382	11.2332	19.4909
585	Ce1B1O3	Pm-3m	221	cubic	1.944	6.96458	-2.358	47.429	5	3.61977	3.61977	3.61977	90	90	90	17.4	20.3332	13	4.64758	3.2	2.4	39.785	50.2057	15.432	5.66964	1.78	0.355528	1.054	0.32946	186	53.5313	0.92	0.466476	2.696	0.956527	102.527	48.4264	200000000000	400000000000	7.61595	10.5829	1620.72	1883.05	716.28	905.776	92.76	75.7382	11.2332	19.4909
586	Ce1B1O3	Pm-3m	221	cubic	2.09	7.11787	-2.358	46.4076	5	3.5936	3.5936	3.5936	90	90	90	17.4	20.3332	13	4.64758	3.2	2.4	39.785	50.2057	15.432	5.66964	1.78	0.355528	1.054	0.32946	186	53.5313	0.92	0.466476	2.696	0.956527	102.527	48.4264	200000000000	400000000000	7.61595	10.5829	1620.72	1883.05	716.28	905.776	92.76	75.7382	11.2332	19.4909
587	Ga1Bi1O3	Pm-3m	221	cubic	1.046	4.73109	-1.576	114.667	5	4.85825	4.85825	4.85825	90	90	90	27.6	29.0971	15.2	1.16619	3.2	1.6	65.3403	74.7733	17.038	3.03307	1.7	0.229347	1.115	0.197737	192.4	54.1021	0.93	0.365294	2.83	0.75004	111.068	39.8255	2.88e-07	5.09e-07	7.41595	11.2252	916.92	1032.55	202.342	196.175	92.76	75.7382	3.4312	4.27411
588	Ga1Bi1O3	Pm-3m	221	cubic	1.161	9.16174	-1.576	59.2137	5	3.89769	3.89769	3.89769	90	90	90	27.6	29.0971	15.2	1.16619	3.2	1.6	65.3403	74.7733	17.038	3.03307	1.7	0.229347	1.115	0.197737	192.4	54.1021	0.93	0.365294	2.83	0.75004	111.068	39.8255	2.88e-07	5.09e-07	7.41595	11.2252	916.92	1032.55	202.342	196.175	92.76	75.7382	3.4312	4.27411
589	Ga1Bi1O3	Pm-3m	221	cubic	1.568	9.37051	-1.576	57.8944	5	3.86853	3.86853	3.86853	90	90	90	27.6	29.0971	15.2	1.16619	3.2	1.6	65.3403	74.7733	17.038	3.03307	1.7	0.229347	1.115	0.197737	192.4	54.1021	0.93	0.365294	2.83	0.75004	111.068	39.8255	2.88e-07	5.09e-07	7.41595	11.2252	916.92	1032.55	202.342	196.175	92.76	75.7382	3.4312	4.27411
590	Ce1Gd1O3	Pm-3m	221	cubic	0.473	4.51142	-3.055	127.12	5	5.0281	5.0281	5.0281	90	90	90	29.2	26.0338	12.4	4.8	4.4	2.93939	69.0728	65.2269	18.534	1.45939	1.864	0.422071	1.187	0.0894204	203.4	65.4633	1.116	0.583013	2.53	1.11488	97.1296	57.2463	4.1e-07	5.34e-07	4.41595	5.37586	1485.32	1709.02	563.48	644.098	92.76	75.7382	3.2332	3.95297
591	Ce1Gd1O3	Pm-3m	221	cubic	1.022	4.51142	-3.055	127.12	5	5.0281	5.0281	5.0281	90	90	90	29.2	26.0338	12.4	4.8	4.4	2.93939	69.0728	65.2269	18.534	1.45939	1.864	0.422071	1.187	0.0894204	203.4	65.4633	1.116	0.583013	2.53	1.11488	97.1296	57.2463	4.1e-07	5.34e-07	4.41595	5.37586	1485.32	1709.02	563.48	644.098	92.76	75.7382	3.2332	3.95297
592	Ce1Gd1O3	Pm-3m	221	cubic	1.022	7.00652	-3.055	81.851	5	4.34185	4.34185	4.34185	90	90	90	29.2	26.0338	12.4	4.8	4.4	2.93939	69.0728	65.2269	18.534	1.45939	1.864	0.422071	1.187	0.0894204	203.4	65.4633	1.116	0.583013	2.53	1.11488	97.1296	57.2463	4.1e-07	5.34e-07	4.41595	5.37586	1485.32	1709.02	563.48	644.098	92.76	75.7382	3.2332	3.95297
593	Ce1Gd1O3	Pm-3m	221	cubic	1.441	6.99447	-3.055	81.992	5	4.34434	4.34434	4.34434	90	90	90	29.2	26.0338	12.4	4.8	4.4	2.93939	69.0728	65.2269	18.534	1.45939	1.864	0.422071	1.187	0.0894204	203.4	65.4633	1.116	0.583013	2.53	1.11488	97.1296	57.2463	4.1e-07	5.34e-07	4.41595	5.37586	1485.32	1709.02	563.48	644.098	92.76	75.7382	3.2332	3.95297
594	Gd1B1O3	Pm-3m	221	cubic	2.392	3.57229	-2.513	100.433	5	4.64827	4.64827	4.64827	90	90	90	18.6	22.7297	14.2	2.4	3.2	2.4	43.2118	57.0545	15.274	5.5302	1.764	0.327023	1.053	0.329387	184.2	50.1135	0.916	0.458589	2.714	0.927094	89.9834	63.0334	200000000000	400000000000	7.61595	10.5829	1598.72	1859.91	819.68	967.436	92.76	75.7382	12.1332	19.3084
595	Gd1B1O3	Pm-3m	221	cubic	2.634	8.31669	-2.513	43.1391	5	3.50717	3.50717	3.50717	90	90	90	18.6	22.7297	14.2	2.4	3.2	2.4	43.2118	57.0545	15.274	5.5302	1.764	0.327023	1.053	0.329387	184.2	50.1135	0.916	0.458589	2.714	0.927094	89.9834	63.0334	200000000000	400000000000	7.61595	10.5829	1598.72	1859.91	819.68	967.436	92.76	75.7382	12.1332	19.3084
596	Gd1B1O3	Pm-3m	221	cubic	2.762	8.53742	-2.513	42.0238	5	3.47668	3.47668	3.47668	90	90	90	18.6	22.7297	14.2	2.4	3.2	2.4	43.2118	57.0545	15.274	5.5302	1.764	0.327023	1.053	0.329387	184.2	50.1135	0.916	0.458589	2.714	0.927094	89.9834	63.0334	200000000000	400000000000	7.61595	10.5829	1598.72	1859.91	819.68	967.436	92.76	75.7382	12.1332	19.3084
597	Dy1Ho1O3	Pm-3m	221	cubic	1.067	5.09411	-2.875	122.379	5	4.96481	4.96481	4.96481	90	90	90	31.4	28.6608	14.6	1.74356	4.4	2.93939	75.0857	72.3697	17.966	0.74709	1.834	0.384583	1.1904	0.0898679	202.8	64.6696	1.102	0.565841	2.554	1.08513	84.5856	69.0639	3.48e-07	4.28e-07	5.41595	6.78734	1220.72	1385.44	715.68	809.59	92.76	75.7382	5.7532	7.02654
598	Dy1Ho1O3	Pm-3m	221	cubic	1.003	8.07548	-2.875	77.1984	5	4.25797	4.25797	4.25797	90	90	90	31.4	28.6608	14.6	1.74356	4.4	2.93939	75.0857	72.3697	17.966	0.74709	1.834	0.384583	1.1904	0.0898679	202.8	64.6696	1.102	0.565841	2.554	1.08513	84.5856	69.0639	3.48e-07	4.28e-07	5.41595	6.78734	1220.72	1385.44	715.68	809.59	92.76	75.7382	5.7532	7.02654
599	Dy1Ho1O3	Pm-3m	221	cubic	1.338	8.09657	-2.875	76.9973	5	4.25427	4.25427	4.25427	90	90	90	31.4	28.6608	14.6	1.74356	4.4	2.93939	75.0857	72.3697	17.966	0.74709	1.834	0.384583	1.1904	0.0898679	202.8	64.6696	1.102	0.565841	2.554	1.08513	84.5856	69.0639	3.48e-07	4.28e-07	5.41595	6.78734	1220.72	1385.44	715.68	809.59	92.76	75.7382	5.7532	7.02654
600	Ho1Cr1O3	Pm-3m	221	cubic	1.474	4.27514	-2.868	102.901	5	4.68605	4.68605	4.68605	90	90	90	23	22.8561	13.4	3.87814	3.6	2.33238	52.9849	57.6828	15.61	4.22395	1.784	0.33212	1.1522	0.135836	195.6	57.1265	1.002	0.469655	2.642	0.98676	97.4456	57.0596	1.88e-07	3.17e-07	22.0159	36.5198	1241.52	1410.16	815.68	942.496	92.76	75.7382	7.6332	9.14406
601	Ho1Cr1O3	Pm-3m	221	cubic	1.482	7.80099	-2.868	56.3925	5	3.83478	3.83478	3.83478	90	90	90	23	22.8561	13.4	3.87814	3.6	2.33238	52.9849	57.6828	15.61	4.22395	1.784	0.33212	1.1522	0.135836	195.6	57.1265	1.002	0.469655	2.642	0.98676	97.4456	57.0596	1.88e-07	3.17e-07	22.0159	36.5198	1241.52	1410.16	815.68	942.496	92.76	75.7382	7.6332	9.14406
602	Ho1Cr1O3	Pm-3m	221	cubic	1.675	7.93236	-2.868	55.4586	5	3.81349	3.81349	3.81349	90	90	90	23	22.8561	13.4	3.87814	3.6	2.33238	52.9849	57.6828	15.61	4.22395	1.784	0.33212	1.1522	0.135836	195.6	57.1265	1.002	0.469655	2.642	0.98676	97.4456	57.0596	1.88e-07	3.17e-07	22.0159	36.5198	1241.52	1410.16	815.68	942.496	92.76	75.7382	7.6332	9.14406
604	Gd1In1O3	Pm-3m	221	cubic	1.281	4.47237	-2.182	118.837	5	4.91644	4.91644	4.91644	90	90	90	27.4	24.2289	14.2	2.4	3.8	2.4	64.0132	60.3162	17.548	1.32928	1.766	0.328	1.159	0.130859	194.4	55.5575	1.032	0.496484	2.662	0.96975	90.3656	62.6549	2.78e-07	5.17e-07	18.6159	31.9757	1227.72	1442.12	435.83	592.652	92.76	75.7382	2.7852	3.79444
605	Gd1In1O3	Pm-3m	221	cubic	1.291	7.63967	-2.182	69.5687	5	4.1128	4.1128	4.1128	90	90	90	27.4	24.2289	14.2	2.4	3.8	2.4	64.0132	60.3162	17.548	1.32928	1.766	0.328	1.159	0.130859	194.4	55.5575	1.032	0.496484	2.662	0.96975	90.3656	62.6549	2.78e-07	5.17e-07	18.6159	31.9757	1227.72	1442.12	435.83	592.652	92.76	75.7382	2.7852	3.79444
606	Gd1In1O3	Pm-3m	221	cubic	1.637	7.73478	-2.182	68.7133	5	4.09588	4.09588	4.09588	90	90	90	27.4	24.2289	14.2	2.4	3.8	2.4	64.0132	60.3162	17.548	1.32928	1.766	0.328	1.159	0.130859	194.4	55.5575	1.032	0.496484	2.662	0.96975	90.3656	62.6549	2.78e-07	5.17e-07	18.6159	31.9757	1227.72	1442.12	435.83	592.652	92.76	75.7382	2.7852	3.79444
607	Ho1Lu1O3	Pm-3m	221	cubic	1.632	5.35219	-3.121	120.346	5	4.93716	4.93716	4.93716	90	90	90	32.4	29.9105	15.6	1.35647	4.4	2.93939	77.5791	75.4862	17.72	0.535313	1.82	0.367913	1.1644	0.117767	199.2	60.5884	1.09	0.551362	2.564	1.07295	91.1476	61.9028	2.79e-07	3.49e-07	6.41595	7.82535	1387.72	1603.7	764.68	871.517	92.76	75.7382	7.9332	9.57569
608	Ho1Lu1O3	Pm-3m	221	cubic	1.568	8.99235	-3.121	71.6293	5	4.15301	4.15301	4.15301	90	90	90	32.4	29.9105	15.6	1.35647	4.4	2.93939	77.5791	75.4862	17.72	0.535313	1.82	0.367913	1.1644	0.117767	199.2	60.5884	1.09	0.551362	2.564	1.07295	91.1476	61.9028	2.79e-07	3.49e-07	6.41595	7.82535	1387.72	1603.7	764.68	871.517	92.76	75.7382	7.9332	9.57569
609	Ho1Lu1O3	Pm-3m	221	cubic	2.131	9.05018	-3.121	71.1716	5	4.14415	4.14415	4.14415	90	90	90	32.4	29.9105	15.6	1.35647	4.4	2.93939	77.5791	75.4862	17.72	0.535313	1.82	0.367913	1.1644	0.117767	199.2	60.5884	1.09	0.551362	2.564	1.07295	91.1476	61.9028	2.79e-07	3.49e-07	6.41595	7.82535	1387.72	1603.7	764.68	871.517	92.76	75.7382	7.9332	9.57569
613	Gd1Lu1O3	Pm-3m	221	cubic	0.396	7.9614	-2.635	79.3029	5	4.29632	4.29632	4.29632	90	90	90	31.8	29.2329	15	2.52982	4.4	2.93939	76.043	73.7513	17.952	0.98749	1.828	0.378545	1.1712	0.111246	198.4	59.4932	1.096	0.559056	2.56	1.07794	91.1476	61.9028	3.78e-07	5.17e-07	5.41595	6.78734	1493.72	1719.63	734.88	839.835	92.76	75.7382	6.5332	8.61086
614	Ce1Al1O3	Pm-3m	221	cubic	2.794	3.22776	-3.47	110.657	5	4.80094	4.80094	4.80094	90	90	90	19	19.5959	13	4.64758	3.4	2.33238	43.0191	48.7344	16.554	3.52166	1.764	0.350634	1.107	0.226971	192.6	55.8484	1	0.48	2.61	1.02828	105.482	43.9734	1.53e-07	2.93e-07	49.2159	92.9892	1339.12	1552.56	433.174	465.36	92.76	75.7382	3.3732	4.19513
615	Ce1Al1O3	Pm-3m	221	cubic	2.712	6.4795	-3.47	55.1238	5	3.8058	3.8058	3.8058	90	90	90	19	19.5959	13	4.64758	3.4	2.33238	43.0191	48.7344	16.554	3.52166	1.764	0.350634	1.107	0.226971	192.6	55.8484	1	0.48	2.61	1.02828	105.482	43.9734	1.53e-07	2.93e-07	49.2159	92.9892	1339.12	1552.56	433.174	465.36	92.76	75.7382	3.3732	4.19513
616	Ce1Al1O3	Pm-3m	221	cubic	3.043	6.60417	-3.47	54.0833	5	3.78171	3.78171	3.78171	90	90	90	19	19.5959	13	4.64758	3.4	2.33238	43.0191	48.7344	16.554	3.52166	1.764	0.350634	1.107	0.226971	192.6	55.8484	1	0.48	2.61	1.02828	105.482	43.9734	1.53e-07	2.93e-07	49.2159	92.9892	1339.12	1552.56	433.174	465.36	92.76	75.7382	3.3732	4.19513
621	Gd1Ga1O3	Pm-3m	221	cubic	2.723	4.06383	-2.726	112.357	5	4.8254	4.8254	4.8254	90	90	90	23.8	21.9854	14.2	2.4	3.6	2.33238	54.9942	55.1996	16.756	2.66613	1.754	0.322837	1.123	0.195131	192.2	53.7788	0.994	0.472	2.668	0.964353	92.8836	60.3445	2.9e-07	5.13e-07	8.01595	11.3201	1254.12	1463.38	410.462	595.079	92.76	75.7382	3.2512	3.96344
622	Gd1Ga1O3	Pm-3m	221	cubic	2.603	8.06694	-2.726	56.6014	5	3.83951	3.83951	3.83951	90	90	90	23.8	21.9854	14.2	2.4	3.6	2.33238	54.9942	55.1996	16.756	2.66613	1.754	0.322837	1.123	0.195131	192.2	53.7788	0.994	0.472	2.668	0.964353	92.8836	60.3445	2.9e-07	5.13e-07	8.01595	11.3201	1254.12	1463.38	410.462	595.079	92.76	75.7382	3.2512	3.96344
623	Gd1Ga1O3	Pm-3m	221	cubic	2.935	8.23833	-2.726	55.4239	5	3.8127	3.8127	3.8127	90	90	90	23.8	21.9854	14.2	2.4	3.6	2.33238	54.9942	55.1996	16.756	2.66613	1.754	0.322837	1.123	0.195131	192.2	53.7788	0.994	0.472	2.668	0.964353	92.8836	60.3445	2.9e-07	5.13e-07	8.01595	11.3201	1254.12	1463.38	410.462	595.079	92.76	75.7382	3.2512	3.96344
624	Cd1Ge1O3	Pm-3m	221	cubic	0.407	7.31892	-1.405	52.8749	5	3.75333	3.75333	3.75333	90	90	90	20.8	16.473	14.8	1.6	3	1.26491	46.6098	39.5433	15.742	1.99163	1.77	0.306985	1.128	0.190725	185.6	44.0572	0.904	0.32946	2.804	0.785483	108.373	54.8547	0.000100014	0.000199993	31.4159	40.1851	880.72	1165.7	394.004	458.999	92.76	75.7382	7.7532	12.2517
625	Lu1Al1O3	Pm-3m	221	cubic	2.965	3.92228	-3.388	105.818	5	4.72991	4.72991	4.72991	90	90	90	21.6	24.7758	15.6	1.35647	3.4	2.33238	49.9893	62.6334	15.972	2.99043	1.728	0.284422	1.0912	0.231015	187.6	47.5924	0.98	0.445421	2.64	0.985677	99.5	50.8763	1.21e-07	2.3e-07	50.2159	92.5989	1347.52	1565.01	604.574	742.759	92.76	75.7382	6.6732	8.67156
626	Lu1Al1O3	Pm-3m	221	cubic	3.033	8.32924	-3.388	49.83	5	3.67985	3.67985	3.67985	90	90	90	21.6	24.7758	15.6	1.35647	3.4	2.33238	49.9893	62.6334	15.972	2.99043	1.728	0.284422	1.0912	0.231015	187.6	47.5924	0.98	0.445421	2.64	0.985677	99.5	50.8763	1.21e-07	2.3e-07	50.2159	92.5989	1347.52	1565.01	604.574	742.759	92.76	75.7382	6.6732	8.67156
627	Lu1Al1O3	Pm-3m	221	cubic	3.267	8.53466	-3.388	48.6307	5	3.65009	3.65009	3.65009	90	90	90	21.6	24.7758	15.6	1.35647	3.4	2.33238	49.9893	62.6334	15.972	2.99043	1.728	0.284422	1.0912	0.231015	187.6	47.5924	0.98	0.445421	2.64	0.985677	99.5	50.8763	1.21e-07	2.3e-07	50.2159	92.5989	1347.52	1565.01	604.574	742.759	92.76	75.7382	6.6732	8.67156
628	Eu1Hf1O3	Pm-3m	221	cubic	0.557	4.83134	-3.746	130.075	5	5.06677	5.06677	5.06677	90	90	90	31.8	29.2875	12.2	4.91528	4	2.52982	75.6904	73.586	18.898	5.25987	1.828	0.379125	1.1657	0.159637	197.2	58.5812	1.078	0.539793	2.566	1.07122	101.528	54.834	2.48e-07	3.52e-07	7.41595	9.48705	1389.32	1864.87	753.88	964.901	92.76	75.7382	7.0732	9.84771
629	Eu1Hf1O3	Pm-3m	221	cubic	3.399	4.83134	-3.746	130.075	5	5.06677	5.06677	5.06677	90	90	90	31.8	29.2875	12.2	4.91528	4	2.52982	75.6904	73.586	18.898	5.25987	1.828	0.379125	1.1657	0.159637	197.2	58.5812	1.078	0.539793	2.566	1.07122	101.528	54.834	2.48e-07	3.52e-07	7.41595	9.48705	1389.32	1864.87	753.88	964.901	92.76	75.7382	7.0732	9.84771
630	Eu1Hf1O3	Pm-3m	221	cubic	3.412	9.19058	-3.746	68.3781	5	4.08921	4.08921	4.08921	90	90	90	31.8	29.2875	12.2	4.91528	4	2.52982	75.6904	73.586	18.898	5.25987	1.828	0.379125	1.1657	0.159637	197.2	58.5812	1.078	0.539793	2.566	1.07122	101.528	54.834	2.48e-07	3.52e-07	7.41595	9.48705	1389.32	1864.87	753.88	964.901	92.76	75.7382	7.0732	9.84771
631	Eu1Hf1O3	Pm-3m	221	cubic	3.968	9.35194	-3.746	67.1983	5	4.06555	4.06555	4.06555	90	90	90	31.8	29.2875	12.2	4.91528	4	2.52982	75.6904	73.586	18.898	5.25987	1.828	0.379125	1.1657	0.159637	197.2	58.5812	1.078	0.539793	2.566	1.07122	101.528	54.834	2.48e-07	3.52e-07	7.41595	9.48705	1389.32	1864.87	753.88	964.901	92.76	75.7382	7.0732	9.84771
632	Ce1Dy1O3	Pm-3m	221	cubic	0.489	4.63519	-3.16	125.606	5	5.00807	5.00807	5.00807	90	90	90	29.6	26.5752	12.8	4.66476	4.4	2.93939	70.1228	66.6643	18.356	1.33051	1.858	0.415423	1.1982	0.0773884	203.8	65.9284	1.112	0.578218	2.532	1.11252	97.1296	57.2463	3.33e-07	4.12e-07	4.41595	5.37586	1348.72	1561.63	582.48	674.629	92.76	75.7382	3.4532	4.33555
633	Ce1Dy1O3	Pm-3m	221	cubic	1.17	4.63519	-3.16	125.606	5	5.00807	5.00807	5.00807	90	90	90	29.6	26.5752	12.8	4.66476	4.4	2.93939	70.1228	66.6643	18.356	1.33051	1.858	0.415423	1.1982	0.0773884	203.8	65.9284	1.112	0.578218	2.532	1.11252	97.1296	57.2463	3.33e-07	4.12e-07	4.41595	5.37586	1348.72	1561.63	582.48	674.629	92.76	75.7382	3.4532	4.33555
634	Ce1Dy1O3	Pm-3m	221	cubic	1.171	7.34873	-3.16	79.2257	5	4.29492	4.29492	4.29492	90	90	90	29.6	26.5752	12.8	4.66476	4.4	2.93939	70.1228	66.6643	18.356	1.33051	1.858	0.415423	1.1982	0.0773884	203.8	65.9284	1.112	0.578218	2.532	1.11252	97.1296	57.2463	3.33e-07	4.12e-07	4.41595	5.37586	1348.72	1561.63	582.48	674.629	92.76	75.7382	3.4532	4.33555
635	Ce1Dy1O3	Pm-3m	221	cubic	1.719	7.37192	-3.16	78.9765	5	4.29042	4.29042	4.29042	90	90	90	29.6	26.5752	12.8	4.66476	4.4	2.93939	70.1228	66.6643	18.356	1.33051	1.858	0.415423	1.1982	0.0773884	203.8	65.9284	1.112	0.578218	2.532	1.11252	97.1296	57.2463	3.33e-07	4.12e-07	4.41595	5.37586	1348.72	1561.63	582.48	674.629	92.76	75.7382	3.4532	4.33555
636	B1As1O3	Pm-3m	221	cubic	0.629	2.49788	-0.852	88.9015	5	4.4631	4.4631	4.4631	90	90	90	12.4	10.3653	15.2	1.16619	2.4	0.8	26.7462	24.1714	13.884	5.04492	1.666	0.180178	0.97	0.363868	166	19.6367	0.792	0.218211	2.908	0.653067	105.497	46.3027	200000000000	400000000000	15.4159	20.2027	1071.52	1594.39	720.68	907.525	432.76	636.443	15.6732	20.195
637	B1As1O3	Pm-3m	221	cubic	0.636	5.60945	-0.852	39.5877	5	3.40816	3.40816	3.40816	90	90	90	12.4	10.3653	15.2	1.16619	2.4	0.8	26.7462	24.1714	13.884	5.04492	1.666	0.180178	0.97	0.363868	166	19.6367	0.792	0.218211	2.908	0.653067	105.497	46.3027	200000000000	400000000000	15.4159	20.2027	1071.52	1594.39	720.68	907.525	432.76	636.443	15.6732	20.195
638	B1As1O3	Pm-3m	221	cubic	0.781	5.76511	-0.852	38.5188	5	3.37721	3.37721	3.37721	90	90	90	12.4	10.3653	15.2	1.16619	2.4	0.8	26.7462	24.1714	13.884	5.04492	1.666	0.180178	0.97	0.363868	166	19.6367	0.792	0.218211	2.908	0.653067	105.497	46.3027	200000000000	400000000000	15.4159	20.2027	1071.52	1594.39	720.68	907.525	432.76	636.443	15.6732	20.195
639	Dy1Lu1O3	Pm-3m	221	cubic	1.533	5.30014	-3.148	120.767	5	4.9429	4.9429	4.9429	90	90	90	32.2	29.681	15.4	1.74356	4.4	2.93939	77.093	74.9279	17.774	0.639049	1.822	0.370535	1.1824	0.10355	198.8	60.038	1.092	0.55391	2.562	1.07544	91.1476	61.9028	3.01e-07	3.85e-07	5.41595	6.78734	1357.12	1573.96	753.88	859.693	92.76	75.7382	6.7532	8.7101
640	Dy1Lu1O3	Pm-3m	221	cubic	1.535	8.90606	-3.148	71.8702	5	4.15767	4.15767	4.15767	90	90	90	32.2	29.681	15.4	1.74356	4.4	2.93939	77.093	74.9279	17.774	0.639049	1.822	0.370535	1.1824	0.10355	198.8	60.038	1.092	0.55391	2.562	1.07544	91.1476	61.9028	3.01e-07	3.85e-07	5.41595	6.78734	1357.12	1573.96	753.88	859.693	92.76	75.7382	6.7532	8.7101
641	Dy1Lu1O3	Pm-3m	221	cubic	1.996	8.98837	-3.148	71.212	5	4.14494	4.14494	4.14494	90	90	90	32.2	29.681	15.4	1.74356	4.4	2.93939	77.093	74.9279	17.774	0.639049	1.822	0.370535	1.1824	0.10355	198.8	60.038	1.092	0.55391	2.562	1.07544	91.1476	61.9028	3.01e-07	3.85e-07	5.41595	6.78734	1357.12	1573.96	753.88	859.693	92.76	75.7382	6.7532	8.7101
645	La1Gd1O3	Pm-3m	221	cubic	0.396	6.24558	-2.493	91.5016	5	4.50619	4.50619	4.50619	90	90	90	29	25.8147	12.2	5.15364	4.4	2.93939	68.8307	64.9644	18.874	2.01452	1.866	0.424716	1.2054	0.0735706	205.4	68.1164	1.136	0.608658	2.526	1.11996	93.6556	59.7034	3.85e-07	5.2e-07	4.81595	5.89975	1507.32	1737	588.48	665.273	92.76	75.7382	3.3732	4.04216
646	Ac1Fe1O3	Pm-3m	221	cubic	0.457	8.86308	-2.707	61.985	5	3.95757	3.95757	3.95757	90	90	90	27.8	31.3841	11.8	5.38145	3.8	2.71293	66.1686	81.883	16.344	5.04475	1.814	0.384895	1.1785	0.163	195.4	56.9547	1.034	0.540503	2.648	0.997826	94.2534	57.5445	2e-08	4e-08	18.4159	31.1393	1395.52	1604.7	659.68	756.726	92.76	75.7382	5.6932	6.70112
647	Er1Lu1O3	Pm-3m	221	cubic	1.551	5.40696	-3.092	119.842	5	4.93026	4.93026	4.93026	90	90	90	32.6	30.1437	15.8	0.979796	4.4	2.93939	78.0448	76.0289	17.664	0.429958	1.818	0.365316	1.1622	0.120131	198.4	59.4932	1.086	0.546319	2.566	1.07047	91.1476	61.9028	2.88e-07	3.64e-07	6.21595	7.58699	1417.32	1634.13	778.28	886.932	92.76	75.7382	8.5132	10.1763
648	Er1Lu1O3	Pm-3m	221	cubic	1.605	10.0543	-3.092	64.448	5	4.00931	4.00931	4.00931	90	90	90	32.6	30.1437	15.8	0.979796	4.4	2.93939	78.0448	76.0289	17.664	0.429958	1.818	0.365316	1.1622	0.120131	198.4	59.4932	1.086	0.546319	2.566	1.07047	91.1476	61.9028	2.88e-07	3.64e-07	6.21595	7.58699	1417.32	1634.13	778.28	886.932	92.76	75.7382	8.5132	10.1763
649	Nd1In1O3	Pm-3m	221	cubic	1.505	4.25095	-2.307	119.945	5	4.93168	4.93168	4.93168	90	90	90	26.6	23.0443	13.4	3.87814	3.8	2.4	61.4116	56.3914	17.686	1.5787	1.776	0.345636	1.1993	0.129807	197.6	60.5726	1.044	0.515736	2.648	0.990886	90.3656	62.6549	1.45e-07	2.51e-07	19.8159	31.7794	1197.72	1394.84	378.23	481.791	92.76	75.7382	2.2052	2.71554
650	Nd1In1O3	Pm-3m	221	cubic	1.252	7.36029	-2.307	69.2748	5	4.107	4.107	4.107	90	90	90	26.6	23.0443	13.4	3.87814	3.8	2.4	61.4116	56.3914	17.686	1.5787	1.776	0.345636	1.1993	0.129807	197.6	60.5726	1.044	0.515736	2.648	0.990886	90.3656	62.6549	1.45e-07	2.51e-07	19.8159	31.7794	1197.72	1394.84	378.23	481.791	92.76	75.7382	2.2052	2.71554
651	Nd1In1O3	Pm-3m	221	cubic	1.79	7.32533	-2.307	69.6054	5	4.11353	4.11353	4.11353	90	90	90	26.6	23.0443	13.4	3.87814	3.8	2.4	61.4116	56.3914	17.686	1.5787	1.776	0.345636	1.1993	0.129807	197.6	60.5726	1.044	0.515736	2.648	0.990886	90.3656	62.6549	1.45e-07	2.51e-07	19.8159	31.7794	1197.72	1394.84	378.23	481.791	92.76	75.7382	2.2052	2.71554
652	La1Ho1O3	Pm-3m	221	cubic	1.171	4.55178	-3.298	128.353	5	5.04431	5.04431	5.04431	90	90	90	29.6	26.6428	12.8	5.03587	4.4	2.93939	70.3668	67.0928	18.642	1.94873	1.858	0.416	1.1986	0.0858548	206.2	68.9939	1.13	0.601997	2.53	1.11528	93.6556	59.7034	2.86e-07	3.56e-07	5.81595	7.15368	1401.32	1623.21	618.28	711.008	92.76	75.7382	4.7732	6.53713
653	La1Ho1O3	Pm-3m	221	cubic	1.162	7.39165	-3.298	79.0397	5	4.29156	4.29156	4.29156	90	90	90	29.6	26.6428	12.8	5.03587	4.4	2.93939	70.3668	67.0928	18.642	1.94873	1.858	0.416	1.1986	0.0858548	206.2	68.9939	1.13	0.601997	2.53	1.11528	93.6556	59.7034	2.86e-07	3.56e-07	5.81595	7.15368	1401.32	1623.21	618.28	711.008	92.76	75.7382	4.7732	6.53713
654	La1Ho1O3	Pm-3m	221	cubic	2.012	7.47357	-3.298	78.1734	5	4.27582	4.27582	4.27582	90	90	90	29.6	26.6428	12.8	5.03587	4.4	2.93939	70.3668	67.0928	18.642	1.94873	1.858	0.416	1.1986	0.0858548	206.2	68.9939	1.13	0.601997	2.53	1.11528	93.6556	59.7034	2.86e-07	3.56e-07	5.81595	7.15368	1401.32	1623.21	618.28	711.008	92.76	75.7382	4.7732	6.53713
655	Gd1Er1O3	Pm-3m	221	cubic	0.569	5.01312	-2.729	123.389	5	4.97842	4.97842	4.97842	90	90	90	31.2	28.4422	14.4	2.33238	4.4	2.93939	74.5014	71.7199	18.088	1.00117	1.838	0.38979	1.177	0.102645	201.6	63.1968	1.102	0.566053	2.554	1.08517	84.5856	69.0639	4.34e-07	5.5e-07	5.21595	6.4803	1386.92	1592.74	710.28	805.723	92.76	75.7382	6.1132	7.86514
656	Gd1Er1O3	Pm-3m	221	cubic	0.48	7.76445	-2.729	79.666	5	4.30286	4.30286	4.30286	90	90	90	31.2	28.4422	14.4	2.33238	4.4	2.93939	74.5014	71.7199	18.088	1.00117	1.838	0.38979	1.177	0.102645	201.6	63.1968	1.102	0.566053	2.554	1.08517	84.5856	69.0639	4.34e-07	5.5e-07	5.21595	6.4803	1386.92	1592.74	710.28	805.723	92.76	75.7382	6.1132	7.86514
657	Gd1Er1O3	Pm-3m	221	cubic	0.863	7.76445	-2.729	79.666	5	4.30286	4.30286	4.30286	90	90	90	31.2	28.4422	14.4	2.33238	4.4	2.93939	74.5014	71.7199	18.088	1.00117	1.838	0.38979	1.177	0.102645	201.6	63.1968	1.102	0.566053	2.554	1.08517	84.5856	69.0639	4.34e-07	5.5e-07	5.21595	6.4803	1386.92	1592.74	710.28	805.723	92.76	75.7382	6.1132	7.86514
658	Al1Bi1O3	Pm-3m	221	cubic	1.245	4.22234	-2.266	111.674	5	4.81561	4.81561	4.81561	90	90	90	24	29.5635	15.2	1.16619	3	1.54919	56.792	76.213	16.678	3.67278	1.694	0.225175	1.098	0.228749	191	53.1413	0.932	0.366955	2.79	0.806573	111.123	39.7305	2.65e-07	5.17e-07	48.6159	93.2432	979.92	1130.75	328.454	357.026	92.76	75.7382	4.4532	5.18253
659	Al1Bi1O3	Pm-3m	221	cubic	1.541	8.64718	-2.266	54.5296	5	3.79208	3.79208	3.79208	90	90	90	24	29.5635	15.2	1.16619	3	1.54919	56.792	76.213	16.678	3.67278	1.694	0.225175	1.098	0.228749	191	53.1413	0.932	0.366955	2.79	0.806573	111.123	39.7305	2.65e-07	5.17e-07	48.6159	93.2432	979.92	1130.75	328.454	357.026	92.76	75.7382	4.4532	5.18253
660	Al1Bi1O3	Pm-3m	221	cubic	1.686	8.83877	-2.266	53.3476	5	3.76448	3.76448	3.76448	90	90	90	24	29.5635	15.2	1.16619	3	1.54919	56.792	76.213	16.678	3.67278	1.694	0.225175	1.098	0.228749	191	53.1413	0.932	0.366955	2.79	0.806573	111.123	39.7305	2.65e-07	5.17e-07	48.6159	93.2432	979.92	1130.75	328.454	357.026	92.76	75.7382	4.4532	5.18253
664	Ho1Al1O3	Pm-3m	221	cubic	2.793	3.70826	-3.447	107.43	5	4.75382	4.75382	4.75382	90	90	90	20.8	23.181	14.8	1.46969	3.4	2.33238	47.982	58.6286	16.164	3.128	1.74	0.306203	1.0992	0.228431	191.6	54.1502	0.99	0.462601	2.632	0.996863	92.938	60.2983	1.68e-07	3.23e-07	50.2159	92.5989	1211.12	1374.31	566.374	675.756	92.76	75.7382	5.6732	6.96724
665	Ho1Al1O3	Pm-3m	221	cubic	2.924	7.86269	-3.447	50.6671	5	3.70034	3.70034	3.70034	90	90	90	20.8	23.181	14.8	1.46969	3.4	2.33238	47.982	58.6286	16.164	3.128	1.74	0.306203	1.0992	0.228431	191.6	54.1502	0.99	0.462601	2.632	0.996863	92.938	60.2983	1.68e-07	3.23e-07	50.2159	92.5989	1211.12	1374.31	566.374	675.756	92.76	75.7382	5.6732	6.96724
666	Ho1Al1O3	Pm-3m	221	cubic	3.166	8.03523	-3.447	49.5792	5	3.67367	3.67367	3.67367	90	90	90	20.8	23.181	14.8	1.46969	3.4	2.33238	47.982	58.6286	16.164	3.128	1.74	0.306203	1.0992	0.228431	191.6	54.1502	0.99	0.462601	2.632	0.996863	92.938	60.2983	1.68e-07	3.23e-07	50.2159	92.5989	1211.12	1374.31	566.374	675.756	92.76	75.7382	5.6732	6.96724
667	Hf1Be1O3	Pm-3m	221	cubic	0.982	4.34279	-2.726	90.0476	5	4.48219	4.48219	4.48219	90	90	90	20	26.0461	10.8	6.4	2.8	1.6	47.1001	65.7507	14.074	4.85546	1.664	0.283027	1.044	0.277027	180.2	40.8725	0.91	0.389358	2.642	0.980539	84.8558	68.7343	7.56e-08	1.33e-07	42.6159	74.2272	1577.72	1942.8	846.08	1014.24	92.76	75.7382	6.8232	9.80633
668	Hf1Be1O3	Pm-3m	221	cubic	0.985	9.62344	-2.726	40.6359	5	3.43798	3.43798	3.43798	90	90	90	20	26.0461	10.8	6.4	2.8	1.6	47.1001	65.7507	14.074	4.85546	1.664	0.283027	1.044	0.277027	180.2	40.8725	0.91	0.389358	2.642	0.980539	84.8558	68.7343	7.56e-08	1.33e-07	42.6159	74.2272	1577.72	1942.8	846.08	1014.24	92.76	75.7382	6.8232	9.80633
669	Hf1Be1O3	Pm-3m	221	cubic	1.281	9.8465	-2.726	39.7154	5	3.41182	3.41182	3.41182	90	90	90	20	26.0461	10.8	6.4	2.8	1.6	47.1001	65.7507	14.074	4.85546	1.664	0.283027	1.044	0.277027	180.2	40.8725	0.91	0.389358	2.642	0.980539	84.8558	68.7343	7.56e-08	1.33e-07	42.6159	74.2272	1577.72	1942.8	846.08	1014.24	92.76	75.7382	6.8232	9.80633
670	Ce1Ga1O3	Pm-3m	221	cubic	2.688	3.76725	-2.788	113.65	5	4.84384	4.84384	4.84384	90	90	90	22.6	19.8151	13	4.64758	3.6	2.33238	51.5674	48.9198	16.914	2.86384	1.77	0.352136	1.124	0.194895	194	56.7239	0.998	0.479016	2.65	0.991847	105.428	44.0523	1.76e-07	2.87e-07	8.01595	11.3201	1276.12	1497.75	307.062	392.416	92.76	75.7382	2.3512	2.60788
671	Ce1Ga1O3	Pm-3m	221	cubic	2.698	7.15412	-2.788	59.8464	5	3.91153	3.91153	3.91153	90	90	90	22.6	19.8151	13	4.64758	3.6	2.33238	51.5674	48.9198	16.914	2.86384	1.77	0.352136	1.124	0.194895	194	56.7239	0.998	0.479016	2.65	0.991847	105.428	44.0523	1.76e-07	2.87e-07	8.01595	11.3201	1276.12	1497.75	307.062	392.416	92.76	75.7382	2.3512	2.60788
672	Ce1Ga1O3	Pm-3m	221	cubic	3.052	7.32626	-2.788	58.4403	5	3.88065	3.88065	3.88065	90	90	90	22.6	19.8151	13	4.64758	3.6	2.33238	51.5674	48.9198	16.914	2.86384	1.77	0.352136	1.124	0.194895	194	56.7239	0.998	0.479016	2.65	0.991847	105.428	44.0523	1.76e-07	2.87e-07	8.01595	11.3201	1276.12	1497.75	307.062	392.416	92.76	75.7382	2.3512	2.60788
673	Co1Ge1O3	Pm-3m	221	cubic	0.57	3.19274	-1.14	93.3947	5	4.53706	4.53706	4.53706	90	90	90	16.6	10.6508	14.2	2.71293	2.8	0.979796	35.9143	24.7728	14.476	4.16177	1.734	0.264394	1.06367	0.240459	183.8	41.5423	0.86	0.269518	2.842	0.73355	121.148	29.8823	0.000100012	0.000199994	32.0159	41.1701	1312.72	1497.66	628.76	724.655	92.76	75.7382	9.7332	12.6503
674	Co1Ge1O3	Pm-3m	221	cubic	0.561	5.80892	-1.14	51.3323	5	3.71647	3.71647	3.71647	90	90	90	16.6	10.6508	14.2	2.71293	2.8	0.979796	35.9143	24.7728	14.476	4.16177	1.734	0.264394	1.06367	0.240459	183.8	41.5423	0.86	0.269518	2.842	0.73355	121.148	29.8823	0.000100012	0.000199994	32.0159	41.1701	1312.72	1497.66	628.76	724.655	92.76	75.7382	9.7332	12.6503
675	Co1Ge1O3	Pm-3m	221	cubic	0.855	5.94797	-1.14	50.1323	5	3.68728	3.68728	3.68728	90	90	90	16.6	10.6508	14.2	2.71293	2.8	0.979796	35.9143	24.7728	14.476	4.16177	1.734	0.264394	1.06367	0.240459	183.8	41.5423	0.86	0.269518	2.842	0.73355	121.148	29.8823	0.000100012	0.000199994	32.0159	41.1701	1312.72	1497.66	628.76	724.655	92.76	75.7382	9.7332	12.6503
676	Hf1Mn1O3	Pm-3m	221	cubic	0.568	7.15633	-2.698	65.3016	5	4.02693	4.02693	4.02693	90	90	90	24.2	24.7903	11.8	5.23068	3.2	1.6	56.2852	62.9359	14.574	3.9181	1.768	0.309024	1.05567	0.258254	189.6	48.5658	0.97	0.419047	2.638	0.984935	84.8558	68.7343	3.56e-07	5.58e-07	6.17595	8.93454	1496.12	1900.29	837.88	1008.58	92.76	75.7382	7.8732	10.1459
677	Hf1Mn1O3	Pm-3m	221	cubic	0.568	7.07729	-2.698	66.0308	5	4.04187	4.04187	4.04187	90	90	90	24.2	24.7903	11.8	5.23068	3.2	1.6	56.2852	62.9359	14.574	3.9181	1.768	0.309024	1.05567	0.258254	189.6	48.5658	0.97	0.419047	2.638	0.984935	84.8558	68.7343	3.56e-07	5.58e-07	6.17595	8.93454	1496.12	1900.29	837.88	1008.58	92.76	75.7382	7.8732	10.1459
678	Gd1Ho1O3	Pm-3m	221	cubic	1.142	4.96151	-3.015	123.893	5	4.98519	4.98519	4.98519	90	90	90	31	28.1851	14.2	2.4	4.4	2.93939	74.0357	71.1211	18.144	1.02788	1.84	0.392122	1.1792	0.0995417	202.4	64.1891	1.106	0.57081	2.552	1.08759	84.5856	69.0639	4.25e-07	5.43e-07	5.41595	6.78734	1357.32	1560.92	696.68	787.55	92.76	75.7382	5.5332	6.87119
679	Gd1Ho1O3	Pm-3m	221	cubic	1.144	8.0039	-3.015	76.7996	5	4.25063	4.25063	4.25063	90	90	90	31	28.1851	14.2	2.4	4.4	2.93939	74.0357	71.1211	18.144	1.02788	1.84	0.392122	1.1792	0.0995417	202.4	64.1891	1.106	0.57081	2.552	1.08759	84.5856	69.0639	4.25e-07	5.43e-07	5.41595	6.78734	1357.32	1560.92	696.68	787.55	92.76	75.7382	5.5332	6.87119
680	Gd1Ho1O3	Pm-3m	221	cubic	1.67	8.06877	-3.015	76.1821	5	4.2392	4.2392	4.2392	90	90	90	31	28.1851	14.2	2.4	4.4	2.93939	74.0357	71.1211	18.144	1.02788	1.84	0.392122	1.1792	0.0995417	202.4	64.1891	1.106	0.57081	2.552	1.08759	84.5856	69.0639	4.25e-07	5.43e-07	5.41595	6.78734	1357.32	1560.92	696.68	787.55	92.76	75.7382	5.5332	6.87119
681	Hf1Mg1O3	Pm-3m	221	cubic	0.824	3.9596	-2.878	105.175	5	4.72032	4.72032	4.72032	90	90	90	21.6	25.2476	10.8	6.4	3	1.54919	50.1586	64.2463	15.904	1.792	1.704	0.275289	1.098	0.198434	190.8	49.9736	0.992	0.43774	2.59	1.04104	84.8558	68.7343	7.68e-08	1.33e-07	36.6159	62.3304	1301.92	1853.78	718.68	954.827	92.76	75.7382	6.9732	9.82813
682	Hf1Mg1O3	Pm-3m	221	cubic	0.824	6.30964	-2.878	66.0025	5	4.04129	4.04129	4.04129	90	90	90	21.6	25.2476	10.8	6.4	3	1.54919	50.1586	64.2463	15.904	1.792	1.704	0.275289	1.098	0.198434	190.8	49.9736	0.992	0.43774	2.59	1.04104	84.8558	68.7343	7.68e-08	1.33e-07	36.6159	62.3304	1301.92	1853.78	718.68	954.827	92.76	75.7382	6.9732	9.82813
683	Hf1Mg1O3	Pm-3m	221	cubic	0.963	6.32986	-2.878	65.7916	5	4.03698	4.03698	4.03698	90	90	90	21.6	25.2476	10.8	6.4	3	1.54919	50.1586	64.2463	15.904	1.792	1.704	0.275289	1.098	0.198434	190.8	49.9736	0.992	0.43774	2.59	1.04104	84.8558	68.7343	7.68e-08	1.33e-07	36.6159	62.3304	1301.92	1853.78	718.68	954.827	92.76	75.7382	6.9732	9.82813
684	Li1Nb1O3	Pm-3m	221	cubic	1.177	2.47302	-2.57	99.2728	5	4.63031	4.63031	4.63031	90	90	90	13.6	13.8362	10.8	6.49307	2.6	1.2	29.5691	31.8624	15.186	2.75119	1.712	0.261258	1.1	0.197585	183.6	43.4401	0.956	0.395656	2.578	1.07321	114.188	34.0442	4.94e-08	6.31e-08	27.8159	35.4185	1380.52	1911.74	673.618	1049.62	737.36	1244.26	6.0932	10.4092
685	Li1Nb1O3	Pm-3m	221	cubic	1.174	3.9319	-2.57	62.4389	5	3.96721	3.96721	3.96721	90	90	90	13.6	13.8362	10.8	6.49307	2.6	1.2	29.5691	31.8624	15.186	2.75119	1.712	0.261258	1.1	0.197585	183.6	43.4401	0.956	0.395656	2.578	1.07321	114.188	34.0442	4.94e-08	6.31e-08	27.8159	35.4185	1380.52	1911.74	673.618	1049.62	737.36	1244.26	6.0932	10.4092
686	Li1Nb1O3	Pm-3m	221	cubic	1.788	3.95398	-2.57	62.0902	5	3.95981	3.95981	3.95981	90	90	90	13.6	13.8362	10.8	6.49307	2.6	1.2	29.5691	31.8624	15.186	2.75119	1.712	0.261258	1.1	0.197585	183.6	43.4401	0.956	0.395656	2.578	1.07321	114.188	34.0442	4.94e-08	6.31e-08	27.8159	35.4185	1380.52	1911.74	673.618	1049.62	737.36	1244.26	6.0932	10.4092
687	Nd1Er1O3	Pm-3m	221	cubic	0.307	6.86007	-2.424	87.0199	5	4.43138	4.43138	4.43138	90	90	90	30.4	27.5507	13.6	3.87814	4.4	2.93939	71.8998	68.8496	18.226	1.25643	1.848	0.402959	1.2173	0.0938678	204.8	67.3065	1.114	0.58157	2.54	1.10272	84.5856	69.0639	3.01e-07	3.74e-07	6.41595	7.85086	1356.92	1553.14	652.68	749.462	92.76	75.7382	5.5332	7.66141
688	Er1Ga1O3	Pm-3m	221	cubic	2.722	4.30517	-2.655	109.919	5	4.79025	4.79025	4.79025	90	90	90	24.6	23.4572	15	1.26491	3.6	2.33238	56.996	58.9272	16.468	2.37256	1.744	0.304802	1.114	0.198151	192.2	53.7788	0.984	0.454603	2.674	0.955314	92.8836	60.3445	2e-07	3.34e-07	8.81595	11.6396	1177.72	1348.38	453.862	680.884	92.76	75.7382	5.2312	7.62337
689	Er1Ga1O3	Pm-3m	221	cubic	2.701	8.5065	-2.655	55.6305	5	3.81743	3.81743	3.81743	90	90	90	24.6	23.4572	15	1.26491	3.6	2.33238	56.996	58.9272	16.468	2.37256	1.744	0.304802	1.114	0.198151	192.2	53.7788	0.984	0.454603	2.674	0.955314	92.8836	60.3445	2e-07	3.34e-07	8.81595	11.6396	1177.72	1348.38	453.862	680.884	92.76	75.7382	5.2312	7.62337
690	Er1Ga1O3	Pm-3m	221	cubic	3.06	8.68265	-2.655	54.5019	5	3.79144	3.79144	3.79144	90	90	90	24.6	23.4572	15	1.26491	3.6	2.33238	56.996	58.9272	16.468	2.37256	1.744	0.304802	1.114	0.198151	192.2	53.7788	0.984	0.454603	2.674	0.955314	92.8836	60.3445	2e-07	3.34e-07	8.81595	11.6396	1177.72	1348.38	453.862	680.884	92.76	75.7382	5.2312	7.62337
691	Cs1Nb1O3	Pm-3m	221	cubic	0.742	2.40115	-2.431	189.356	5	5.74239	5.74239	5.74239	90	90	90	24	20.0898	10.8	6.49307	3.4	1.74356	54.762	49.1305	26.77	22.2293	2.034	0.743333	1.282	0.314223	210.8	79.946	1.172	0.701267	2.54	1.13093	111.363	38.7201	7.24e-08	9.05e-08	18.0159	22.7558	1246.32	1914.12	643.198	1057.73	480.36	731.275	5.9112	10.4694
692	Cs1Nb1O3	Pm-3m	221	cubic	0.897	6.22253	-2.431	73.0687	5	4.18065	4.18065	4.18065	90	90	90	24	20.0898	10.8	6.49307	3.4	1.74356	54.762	49.1305	26.77	22.2293	2.034	0.743333	1.282	0.314223	210.8	79.946	1.172	0.701267	2.54	1.13093	111.363	38.7201	7.24e-08	9.05e-08	18.0159	22.7558	1246.32	1914.12	643.198	1057.73	480.36	731.275	5.9112	10.4694
693	Cs1Nb1O3	Pm-3m	221	cubic	1.515	6.39234	-2.431	71.1277	5	4.1433	4.1433	4.1433	90	90	90	24	20.0898	10.8	6.49307	3.4	1.74356	54.762	49.1305	26.77	22.2293	2.034	0.743333	1.282	0.314223	210.8	79.946	1.172	0.701267	2.54	1.13093	111.363	38.7201	7.24e-08	9.05e-08	18.0159	22.7558	1246.32	1914.12	643.198	1057.73	480.36	731.275	5.9112	10.4694
694	Ce1Cr1O3	Pm-3m	221	cubic	1.209	3.7569	-2.993	106.128	5	4.73453	4.73453	4.73453	90	90	90	21.2	19.4155	11.6	5.42586	3.6	2.33238	48.0221	48.1112	16	4.57073	1.808	0.370643	1.16	0.130231	196.6	58.6706	1.012	0.486555	2.62	1.01871	109.99	37.9537	1.73e-07	2.88e-07	21.0159	36.7387	1369.52	1581.92	682.48	845.357	92.76	75.7382	5.3332	7.85408
695	Ce1Cr1O3	Pm-3m	221	cubic	1.363	6.67045	-2.993	59.7729	5	3.90992	3.90992	3.90992	90	90	90	21.2	19.4155	11.6	5.42586	3.6	2.33238	48.0221	48.1112	16	4.57073	1.808	0.370643	1.16	0.130231	196.6	58.6706	1.012	0.486555	2.62	1.01871	109.99	37.9537	1.73e-07	2.88e-07	21.0159	36.7387	1369.52	1581.92	682.48	845.357	92.76	75.7382	5.3332	7.85408
696	Ce1Cr1O3	Pm-3m	221	cubic	1.783	6.74804	-2.993	59.0857	5	3.89488	3.89488	3.89488	90	90	90	21.2	19.4155	11.6	5.42586	3.6	2.33238	48.0221	48.1112	16	4.57073	1.808	0.370643	1.16	0.130231	196.6	58.6706	1.012	0.486555	2.62	1.01871	109.99	37.9537	1.73e-07	2.88e-07	21.0159	36.7387	1369.52	1581.92	682.48	845.357	92.76	75.7382	5.3332	7.85408
697	Ac1La1O3	Pm-3m	221	cubic	0.259	6.7747	-2.568	101.451	5	4.66394	4.66394	4.66394	90	90	90	34	33.4126	10.8	6.36867	4.6	3.2	82.7807	86.4042	19.404	2.50389	1.892	0.455781	1.2424	0.0352	206.2	68.9939	1.174	0.654388	2.502	1.14882	100.41	49.8183	1.23e-07	2.46e-07	5.01595	6.11888	1517.32	1748.68	536.08	590.877	92.76	75.7382	4.1732	5.43157
698	Ce1Ho1O3	Pm-3m	221	cubic	0.488	4.68299	-3.206	125.186	5	5.00248	5.00248	5.00248	90	90	90	29.8	26.8507	13	4.64758	4.4	2.93939	70.6089	67.3415	18.302	1.30817	1.856	0.41326	1.1802	0.0985097	204.2	66.4	1.11	0.575847	2.534	1.11016	97.1296	57.2463	3.11e-07	3.81e-07	5.41595	6.78734	1379.32	1591.76	593.28	692.313	92.76	75.7382	4.6332	6.51253
699	Ce1Ho1O3	Pm-3m	221	cubic	1.316	4.68299	-3.206	125.186	5	5.00248	5.00248	5.00248	90	90	90	29.8	26.8507	13	4.64758	4.4	2.93939	70.6089	67.3415	18.302	1.30817	1.856	0.41326	1.1802	0.0985097	204.2	66.4	1.11	0.575847	2.534	1.11016	97.1296	57.2463	3.11e-07	3.81e-07	5.41595	6.78734	1379.32	1591.76	593.28	692.313	92.76	75.7382	4.6332	6.51253
700	Ce1Ho1O3	Pm-3m	221	cubic	1.318	7.45342	-3.206	78.6544	5	4.28457	4.28457	4.28457	90	90	90	29.8	26.8507	13	4.64758	4.4	2.93939	70.6089	67.3415	18.302	1.30817	1.856	0.41326	1.1802	0.0985097	204.2	66.4	1.11	0.575847	2.534	1.11016	97.1296	57.2463	3.11e-07	3.81e-07	5.41595	6.78734	1379.32	1591.76	593.28	692.313	92.76	75.7382	4.6332	6.51253
701	Ce1Ho1O3	Pm-3m	221	cubic	1.887	7.51959	-3.206	77.9623	5	4.27197	4.27197	4.27197	90	90	90	29.8	26.8507	13	4.64758	4.4	2.93939	70.6089	67.3415	18.302	1.30817	1.856	0.41326	1.1802	0.0985097	204.2	66.4	1.11	0.575847	2.534	1.11016	97.1296	57.2463	3.11e-07	3.81e-07	5.41595	6.78734	1379.32	1591.76	593.28	692.313	92.76	75.7382	4.6332	6.51253
702	La1Ga1O3	Pm-3m	221	cubic	3.091	3.64791	-2.872	116.817	5	4.88843	4.88843	4.88843	90	90	90	22.4	19.4587	12.8	5.03587	3.6	2.33238	51.3253	48.482	17.254	3.35137	1.772	0.355831	1.1424	0.194214	196	60.0799	1.018	0.514525	2.646	0.99803	101.954	47.8081	1.51e-07	2.38e-07	8.41595	11.453	1298.12	1532.61	332.062	441.064	92.76	75.7382	2.4912	2.78588
703	La1Ga1O3	Pm-3m	221	cubic	2.99	7.13095	-2.872	59.759	5	3.90962	3.90962	3.90962	90	90	90	22.4	19.4587	12.8	5.03587	3.6	2.33238	51.3253	48.482	17.254	3.35137	1.772	0.355831	1.1424	0.194214	196	60.0799	1.018	0.514525	2.646	0.99803	101.954	47.8081	1.51e-07	2.38e-07	8.41595	11.453	1298.12	1532.61	332.062	441.064	92.76	75.7382	2.4912	2.78588
704	La1Ga1O3	Pm-3m	221	cubic	3.512	7.26873	-2.872	58.6263	5	3.88476	3.88476	3.88476	90	90	90	22.4	19.4587	12.8	5.03587	3.6	2.33238	51.3253	48.482	17.254	3.35137	1.772	0.355831	1.1424	0.194214	196	60.0799	1.018	0.514525	2.646	0.99803	101.954	47.8081	1.51e-07	2.38e-07	8.41595	11.453	1298.12	1532.61	332.062	441.064	92.76	75.7382	2.4912	2.78588
705	Nb1Ga1O3	Pm-3m	221	cubic	0.426	5.39741	-2.162	64.8006	5	4.01661	4.01661	4.01661	90	90	90	19.2	14.0769	13.2	4.26146	3	1.26491	42.1255	32.8269	14.942	2.97728	1.722	0.266113	1.072	0.231032	187.6	46.6716	0.942	0.384312	2.744	0.855257	110.56	40.0948	5.84e-08	7.16e-08	16.6159	21.8016	1552.92	1963.28	643.462	1057.64	92.76	75.7382	6.6112	10.3063
706	Dy1Er1O3	Pm-3m	221	cubic	1.2	5.14691	-3.004	121.875	5	4.95798	4.95798	4.95798	90	90	90	31.6	28.9109	14.8	1.6	4.4	2.93939	75.5514	72.9516	17.91	0.695701	1.832	0.382173	1.1882	0.0935573	202	63.6899	1.098	0.561013	2.556	1.08269	84.5856	69.0639	3.57e-07	4.38e-07	5.21595	6.4803	1250.32	1424.04	729.28	826.966	92.76	75.7382	6.3332	7.98525
707	Dy1Er1O3	Pm-3m	221	cubic	1.2	8.34527	-3.004	75.166	5	4.22027	4.22027	4.22027	90	90	90	31.6	28.9109	14.8	1.6	4.4	2.93939	75.5514	72.9516	17.91	0.695701	1.832	0.382173	1.1882	0.0935573	202	63.6899	1.098	0.561013	2.556	1.08269	84.5856	69.0639	3.57e-07	4.38e-07	5.21595	6.4803	1250.32	1424.04	729.28	826.966	92.76	75.7382	6.3332	7.98525
708	Dy1Er1O3	Pm-3m	221	cubic	1.779	8.40583	-3.004	74.6245	5	4.21011	4.21011	4.21011	90	90	90	31.6	28.9109	14.8	1.6	4.4	2.93939	75.5514	72.9516	17.91	0.695701	1.832	0.382173	1.1882	0.0935573	202	63.6899	1.098	0.561013	2.556	1.08269	84.5856	69.0639	3.57e-07	4.38e-07	5.21595	6.4803	1250.32	1424.04	729.28	826.966	92.76	75.7382	6.3332	7.98525
709	Ac1Dy1O3	Pm-3m	221	cubic	0.298	5.6461	-3.391	128.67	5	5.04846	5.04846	5.04846	90	90	90	35.8	34.8161	12.6	5.04381	4.6	3.2	87.4996	89.9136	18.728	2.01502	1.868	0.429204	1.2342	0.0516	202.8	64.6696	1.146	0.623269	2.526	1.12017	91.3396	61.7228	1.85e-07	3.7e-07	4.61595	5.62969	1336.72	1544.17	633.48	717.67	92.76	75.7382	5.1532	6.10869
710	Ac1Dy1O3	Pm-3m	221	cubic	2.076	5.6461	-3.391	128.67	5	5.04846	5.04846	5.04846	90	90	90	35.8	34.8161	12.6	5.04381	4.6	3.2	87.4996	89.9136	18.728	2.01502	1.868	0.429204	1.2342	0.0516	202.8	64.6696	1.146	0.623269	2.526	1.12017	91.3396	61.7228	1.85e-07	3.7e-07	4.61595	5.62969	1336.72	1544.17	633.48	717.67	92.76	75.7382	5.1532	6.10869
711	Ac1Dy1O3	Pm-3m	221	cubic	2.069	8.92835	-3.391	81.3681	5	4.33329	4.33329	4.33329	90	90	90	35.8	34.8161	12.6	5.04381	4.6	3.2	87.4996	89.9136	18.728	2.01502	1.868	0.429204	1.2342	0.0516	202.8	64.6696	1.146	0.623269	2.526	1.12017	91.3396	61.7228	1.85e-07	3.7e-07	4.61595	5.62969	1336.72	1544.17	633.48	717.67	92.76	75.7382	5.1532	6.10869
712	Ac1Dy1O3	Pm-3m	221	cubic	2.684	8.95999	-3.391	81.0807	5	4.32819	4.32819	4.32819	90	90	90	35.8	34.8161	12.6	5.04381	4.6	3.2	87.4996	89.9136	18.728	2.01502	1.868	0.429204	1.2342	0.0516	202.8	64.6696	1.146	0.623269	2.526	1.12017	91.3396	61.7228	1.85e-07	3.7e-07	4.61595	5.62969	1336.72	1544.17	633.48	717.67	92.76	75.7382	5.1532	6.10869
713	Er1Co1O3	Pm-3m	221	cubic	0.77	9.12235	-2.273	49.9108	5	3.68184	3.68184	3.68184	90	90	90	23.8	23.2929	14.2	2.71293	3.6	2.33238	54.8381	58.6184	15.442	4.40664	1.77	0.319625	1.11567	0.19518	193.8	55.0433	0.974	0.449604	2.688	0.942983	97.3602	57.1094	1.84e-07	3.39e-07	23.0159	38.9264	1322.32	1509.15	746.88	847.69	92.76	75.7382	7.3532	8.81192
714	Ac1La1O3	Pm-3m	221	cubic	0.884	5.10461	-2.983	134.644	5	5.12541	5.12541	5.12541	90	90	90	34	33.4126	10.8	6.36867	4.6	3.2	82.7807	86.4042	19.404	2.50389	1.892	0.455781	1.2424	0.0352	206.2	68.9939	1.174	0.654388	2.502	1.14882	100.41	49.8183	1.23e-07	2.46e-07	5.01595	6.11888	1517.32	1748.68	536.08	590.877	92.76	75.7382	4.1732	5.43157
715	Ac1La1O3	Pm-3m	221	cubic	0.885	7.37796	-2.983	93.1563	5	4.53319	4.53319	4.53319	90	90	90	34	33.4126	10.8	6.36867	4.6	3.2	82.7807	86.4042	19.404	2.50389	1.892	0.455781	1.2424	0.0352	206.2	68.9939	1.174	0.654388	2.502	1.14882	100.41	49.8183	1.23e-07	2.46e-07	5.01595	6.11888	1517.32	1748.68	536.08	590.877	92.76	75.7382	4.1732	5.43157
716	Ac1La1O3	Pm-3m	221	cubic	1.406	7.2903	-2.983	94.2765	5	4.55129	4.55129	4.55129	90	90	90	34	33.4126	10.8	6.36867	4.6	3.2	82.7807	86.4042	19.404	2.50389	1.892	0.455781	1.2424	0.0352	206.2	68.9939	1.174	0.654388	2.502	1.14882	100.41	49.8183	1.23e-07	2.46e-07	5.01595	6.11888	1517.32	1748.68	536.08	590.877	92.76	75.7382	4.1732	5.43157
717	Ac1Ho1O3	Pm-3m	221	cubic	0.299	5.69607	-3.434	128.25	5	5.04296	5.04296	5.04296	90	90	90	36	34.9914	12.8	5.03587	4.6	3.2	87.9857	90.3233	18.674	2.01035	1.866	0.427158	1.2162	0.0876	203.2	65.1564	1.144	0.62118	2.528	1.11784	91.3396	61.7228	1.63e-07	3.26e-07	5.61595	6.96143	1367.32	1574.86	644.28	733.568	92.76	75.7382	6.3332	7.54454
718	Ac1Ho1O3	Pm-3m	221	cubic	2.215	5.69607	-3.434	128.25	5	5.04296	5.04296	5.04296	90	90	90	36	34.9914	12.8	5.03587	4.6	3.2	87.9857	90.3233	18.674	2.01035	1.866	0.427158	1.2162	0.0876	203.2	65.1564	1.144	0.62118	2.528	1.11784	91.3396	61.7228	1.63e-07	3.26e-07	5.61595	6.96143	1367.32	1574.86	644.28	733.568	92.76	75.7382	6.3332	7.54454
719	Ac1Ho1O3	Pm-3m	221	cubic	2.366	9.10628	-3.434	80.2214	5	4.31284	4.31284	4.31284	90	90	90	36	34.9914	12.8	5.03587	4.6	3.2	87.9857	90.3233	18.674	2.01035	1.866	0.427158	1.2162	0.0876	203.2	65.1564	1.144	0.62118	2.528	1.11784	91.3396	61.7228	1.63e-07	3.26e-07	5.61595	6.96143	1367.32	1574.86	644.28	733.568	92.76	75.7382	6.3332	7.54454
720	Ac1Ho1O3	Pm-3m	221	cubic	2.827	9.14591	-3.434	79.8738	5	4.3066	4.3066	4.3066	90	90	90	36	34.9914	12.8	5.03587	4.6	3.2	87.9857	90.3233	18.674	2.01035	1.866	0.427158	1.2162	0.0876	203.2	65.1564	1.144	0.62118	2.528	1.11784	91.3396	61.7228	1.63e-07	3.26e-07	5.61595	6.96143	1367.32	1574.86	644.28	733.568	92.76	75.7382	6.3332	7.54454
721	Cr1Bi1O3	Pm-3m	221	cubic	0.349	8.72918	-1.79	58.7758	5	3.88806	3.88806	3.88806	90	90	90	26.2	29.0682	13.8	3.91918	3.2	1.6	61.7949	74.9016	16.124	4.70278	1.738	0.267013	1.151	0.136836	195	56.2139	0.944	0.377656	2.8	0.792061	115.63	32.1634	2.85e-07	5.1e-07	20.4159	36.9214	1010.32	1180.03	577.76	823.255	92.76	75.7382	6.4132	8.16777
722	La1Cr1O3	Pm-3m	221	cubic	1.353	3.62964	-3.083	109.295	5	4.78117	4.78117	4.78117	90	90	90	21	19.0368	11.4	5.71314	3.6	2.33238	47.78	47.648	16.34	4.95411	1.81	0.373952	1.1784	0.123977	198.6	61.8372	1.032	0.521014	2.616	1.02461	106.516	42.6285	1.48e-07	2.38e-07	21.4159	36.6382	1391.52	1613.69	707.48	858.14	92.76	75.7382	5.4732	7.86204
723	La1Cr1O3	Pm-3m	221	cubic	1.22	6.59785	-3.083	60.126	5	3.91761	3.91761	3.91761	90	90	90	21	19.0368	11.4	5.71314	3.6	2.33238	47.78	47.648	16.34	4.95411	1.81	0.373952	1.1784	0.123977	198.6	61.8372	1.032	0.521014	2.616	1.02461	106.516	42.6285	1.48e-07	2.38e-07	21.4159	36.6382	1391.52	1613.69	707.48	858.14	92.76	75.7382	5.4732	7.86204
724	La1Cr1O3	Pm-3m	221	cubic	1.799	6.70789	-3.083	59.1396	5	3.89607	3.89607	3.89607	90	90	90	21	19.0368	11.4	5.71314	3.6	2.33238	47.78	47.648	16.34	4.95411	1.81	0.373952	1.1784	0.123977	198.6	61.8372	1.032	0.521014	2.616	1.02461	106.516	42.6285	1.48e-07	2.38e-07	21.4159	36.6382	1391.52	1613.69	707.48	858.14	92.76	75.7382	5.4732	7.86204
725	Dy1B1O3	Pm-3m	221	cubic	2.646	3.71508	-2.526	98.9191	5	4.6248	4.6248	4.6248	90	90	90	19	23.5287	14.6	1.74356	3.2	2.4	44.2618	59.1532	15.096	5.39101	1.758	0.316506	1.0642	0.330894	184.6	50.8708	0.912	0.450706	2.716	0.923853	89.9834	63.0334	200000000000	400000000000	7.61595	10.5829	1462.12	1734.42	838.68	983.086	92.76	75.7382	12.3532	19.2891
726	Dy1B1O3	Pm-3m	221	cubic	2.791	8.72481	-2.526	42.1204	5	3.47934	3.47934	3.47934	90	90	90	19	23.5287	14.6	1.74356	3.2	2.4	44.2618	59.1532	15.096	5.39101	1.758	0.316506	1.0642	0.330894	184.6	50.8708	0.912	0.450706	2.716	0.923853	89.9834	63.0334	200000000000	400000000000	7.61595	10.5829	1462.12	1734.42	838.68	983.086	92.76	75.7382	12.3532	19.2891
727	Dy1B1O3	Pm-3m	221	cubic	2.92	8.91608	-2.526	41.2168	5	3.45429	3.45429	3.45429	90	90	90	19	23.5287	14.6	1.74356	3.2	2.4	44.2618	59.1532	15.096	5.39101	1.758	0.316506	1.0642	0.330894	184.6	50.8708	0.912	0.450706	2.716	0.923853	89.9834	63.0334	200000000000	400000000000	7.61595	10.5829	1462.12	1734.42	838.68	983.086	92.76	75.7382	12.3532	19.2891
728	Ac1B1O3	Pm-3m	221	cubic	0.889	4.52906	-2.316	104.789	5	4.71454	4.71454	4.71454	90	90	90	23.6	32.7206	12.8	5.03587	3.4	2.8	57.1618	84.9429	15.804	6.05064	1.79	0.373631	1.09	0.34	185	51.6294	0.954	0.533652	2.69	0.966437	96.7374	54.2234	200000000000	400000000000	7.81595	10.6542	1608.72	1870.34	767.28	930.972	92.76	75.7382	12.9332	19.2863
729	Ac1B1O3	Pm-3m	221	cubic	1.034	9.19044	-2.316	51.6403	5	3.72389	3.72389	3.72389	90	90	90	23.6	32.7206	12.8	5.03587	3.4	2.8	57.1618	84.9429	15.804	6.05064	1.79	0.373631	1.09	0.34	185	51.6294	0.954	0.533652	2.69	0.966437	96.7374	54.2234	200000000000	400000000000	7.81595	10.6542	1608.72	1870.34	767.28	930.972	92.76	75.7382	12.9332	19.2863
730	Ac1B1O3	Pm-3m	221	cubic	1.186	9.41296	-2.316	50.4195	5	3.69431	3.69431	3.69431	90	90	90	23.6	32.7206	12.8	5.03587	3.4	2.8	57.1618	84.9429	15.804	6.05064	1.79	0.373631	1.09	0.34	185	51.6294	0.954	0.533652	2.69	0.966437	96.7374	54.2234	200000000000	400000000000	7.81595	10.6542	1608.72	1870.34	767.28	930.972	92.76	75.7382	12.9332	19.2863
731	Ac1Lu1O3	Pm-3m	221	cubic	0.299	5.90022	-3.586	126.637	5	5.02173	5.02173	5.02173	90	90	90	36.8	35.729	13.6	5.31413	4.6	3.2	89.993	92.105	18.482	2.04049	1.854	0.41548	1.2082	0.1036	199.2	60.5884	1.134	0.611019	2.536	1.10863	97.9016	52.756	1.16e-07	2.32e-07	5.61595	6.96143	1503.72	1731.5	682.48	791.968	92.76	75.7382	7.3332	9.06939
732	Ac1Lu1O3	Pm-3m	221	cubic	2.659	5.90022	-3.586	126.637	5	5.02173	5.02173	5.02173	90	90	90	36.8	35.729	13.6	5.31413	4.6	3.2	89.993	92.105	18.482	2.04049	1.854	0.41548	1.2082	0.1036	199.2	60.5884	1.134	0.611019	2.536	1.10863	97.9016	52.756	1.16e-07	2.32e-07	5.61595	6.96143	1503.72	1731.5	682.48	791.968	92.76	75.7382	7.3332	9.06939
733	Ac1Lu1O3	Pm-3m	221	cubic	2.658	9.7641	-3.586	76.5237	5	4.24553	4.24553	4.24553	90	90	90	36.8	35.729	13.6	5.31413	4.6	3.2	89.993	92.105	18.482	2.04049	1.854	0.41548	1.2082	0.1036	199.2	60.5884	1.134	0.611019	2.536	1.10863	97.9016	52.756	1.16e-07	2.32e-07	5.61595	6.96143	1503.72	1731.5	682.48	791.968	92.76	75.7382	7.3332	9.06939
734	Ac1Lu1O3	Pm-3m	221	cubic	3.137	9.8975	-3.586	75.4923	5	4.22637	4.22637	4.22637	90	90	90	36.8	35.729	13.6	5.31413	4.6	3.2	89.993	92.105	18.482	2.04049	1.854	0.41548	1.2082	0.1036	199.2	60.5884	1.134	0.611019	2.536	1.10863	97.9016	52.756	1.16e-07	2.32e-07	5.61595	6.96143	1503.72	1731.5	682.48	791.968	92.76	75.7382	7.3332	9.06939
738	Lu1Cr1O3	Pm-3m	221	cubic	1.431	4.50775	-2.782	101.289	5	4.66144	4.66144	4.66144	90	90	90	23.8	24.4	14.2	4.11825	3.6	2.33238	54.9923	61.5861	15.418	4.09723	1.772	0.313841	1.1442	0.143131	191.6	51.2664	0.992	0.453008	2.65	0.975377	104.008	46.359	1.41e-07	2.25e-07	22.0159	36.5198	1377.92	1593.98	853.88	981.986	92.76	75.7382	8.6332	10.3125
739	Lu1Cr1O3	Pm-3m	221	cubic	1.566	8.23788	-2.782	55.4249	5	3.81272	3.81272	3.81272	90	90	90	23.8	24.4	14.2	4.11825	3.6	2.33238	54.9923	61.5861	15.418	4.09723	1.772	0.313841	1.1442	0.143131	191.6	51.2664	0.992	0.453008	2.65	0.975377	104.008	46.359	1.41e-07	2.25e-07	22.0159	36.5198	1377.92	1593.98	853.88	981.986	92.76	75.7382	8.6332	10.3125
740	Lu1Cr1O3	Pm-3m	221	cubic	1.862	8.3589	-2.782	54.6225	5	3.79423	3.79423	3.79423	90	90	90	23.8	24.4	14.2	4.11825	3.6	2.33238	54.9923	61.5861	15.418	4.09723	1.772	0.313841	1.1442	0.143131	191.6	51.2664	0.992	0.453008	2.65	0.975377	104.008	46.359	1.41e-07	2.25e-07	22.0159	36.5198	1377.92	1593.98	853.88	981.986	92.76	75.7382	8.6332	10.3125
741	Lu1B1O3	Pm-3m	221	cubic	2.735	4.00671	-2.525	96.8861	5	4.5929	4.5929	4.5929	90	90	90	20	25.5265	15.6	1.35647	3.2	2.4	46.7552	64.1374	14.85	5.23253	1.744	0.292411	1.0382	0.329729	181	44.109	0.9	0.427083	2.726	0.907736	96.5454	54.4473	200000000000	400000000000	8.61595	11.08	1629.12	1892.08	887.68	1028.84	92.76	75.7382	14.5332	19.6371
742	Lu1B1O3	Pm-3m	221	cubic	3.017	9.60709	-2.525	40.4071	5	3.43151	3.43151	3.43151	90	90	90	20	25.5265	15.6	1.35647	3.2	2.4	46.7552	64.1374	14.85	5.23253	1.744	0.292411	1.0382	0.329729	181	44.109	0.9	0.427083	2.726	0.907736	96.5454	54.4473	200000000000	400000000000	8.61595	11.08	1629.12	1892.08	887.68	1028.84	92.76	75.7382	14.5332	19.6371
743	Lu1B1O3	Pm-3m	221	cubic	3.155	9.84034	-2.525	39.4493	5	3.40418	3.40418	3.40418	90	90	90	20	25.5265	15.6	1.35647	3.2	2.4	46.7552	64.1374	14.85	5.23253	1.744	0.292411	1.0382	0.329729	181	44.109	0.9	0.427083	2.726	0.907736	96.5454	54.4473	200000000000	400000000000	8.61595	11.08	1629.12	1892.08	887.68	1028.84	92.76	75.7382	14.5332	19.6371
744	Nb1Cu1O3	Pm-3m	221	cubic	0.954	3.79459	-1.922	89.4689	5	4.47257	4.47257	4.47257	90	90	90	18.8	13.7608	12.8	4.35431	3	1.26491	40.8901	31.8673	14.004	4.27527	1.74	0.27828	1.084	0.215555	188.8	47.8598	0.94	0.382832	2.762	0.836144	126.094	20.6629	3.38e-08	5.95e-08	90.8159	155.999	1697.52	2050.7	854.434	1073.76	92.76	75.7382	8.1132	10.5913
745	Nb1Cu1O3	Pm-3m	221	cubic	0.952	5.53433	-1.922	61.3441	5	3.94388	3.94388	3.94388	90	90	90	18.8	13.7608	12.8	4.35431	3	1.26491	40.8901	31.8673	14.004	4.27527	1.74	0.27828	1.084	0.215555	188.8	47.8598	0.94	0.382832	2.762	0.836144	126.094	20.6629	3.38e-08	5.95e-08	90.8159	155.999	1697.52	2050.7	854.434	1073.76	92.76	75.7382	8.1132	10.5913
746	Nb1Cu1O3	Pm-3m	221	cubic	1.498	5.48128	-1.922	61.9377	5	3.95657	3.95657	3.95657	90	90	90	18.8	13.7608	12.8	4.35431	3	1.26491	40.8901	31.8673	14.004	4.27527	1.74	0.27828	1.084	0.215555	188.8	47.8598	0.94	0.382832	2.762	0.836144	126.094	20.6629	3.38e-08	5.95e-08	90.8159	155.999	1697.52	2050.7	854.434	1073.76	92.76	75.7382	8.1132	10.5913
747	Ho1In1O3	Pm-3m	221	cubic	1.163	4.65545	-2.123	116.903	5	4.88962	4.88962	4.88962	90	90	90	28	25.1476	14.8	1.46969	3.8	2.4	65.5493	62.7209	17.316	0.943898	1.758	0.314096	1.1522	0.135836	195.2	56.7852	1.026	0.487015	2.666	0.963776	90.3656	62.6549	1.79e-07	3.19e-07	19.6159	31.7996	1121.72	1279.86	465.63	650.599	92.76	75.7382	4.1852	6.51454
748	Ho1In1O3	Pm-3m	221	cubic	1.241	7.91261	-2.123	68.7808	5	4.09722	4.09722	4.09722	90	90	90	28	25.1476	14.8	1.46969	3.8	2.4	65.5493	62.7209	17.316	0.943898	1.758	0.314096	1.1522	0.135836	195.2	56.7852	1.026	0.487015	2.666	0.963776	90.3656	62.6549	1.79e-07	3.19e-07	19.6159	31.7996	1121.72	1279.86	465.63	650.599	92.76	75.7382	4.1852	6.51454
749	Ho1In1O3	Pm-3m	221	cubic	1.575	7.98011	-2.123	68.199	5	4.08563	4.08563	4.08563	90	90	90	28	25.1476	14.8	1.46969	3.8	2.4	65.5493	62.7209	17.316	0.943898	1.758	0.314096	1.1522	0.135836	195.2	56.7852	1.026	0.487015	2.666	0.963776	90.3656	62.6549	1.79e-07	3.19e-07	19.6159	31.7996	1121.72	1279.86	465.63	650.599	92.76	75.7382	4.1852	6.51454
750	Lu1In1O3	Pm-3m	221	cubic	0.858	4.86512	-2.01	115.29	5	4.86703	4.86703	4.86703	90	90	90	28.8	26.4076	15.6	1.35647	3.8	2.4	67.5566	65.9471	17.124	0.701131	1.746	0.293639	1.1442	0.143131	191.2	50.8543	1.016	0.471491	2.674	0.951916	96.9276	53.9622	1.32e-07	2.26e-07	19.6159	31.7996	1258.12	1490.95	503.83	725.272	92.76	75.7382	5.1852	8.48933
751	Lu1In1O3	Pm-3m	221	cubic	0.866	8.21967	-2.01	68.239	5	4.08643	4.08643	4.08643	90	90	90	28.8	26.4076	15.6	1.35647	3.8	2.4	67.5566	65.9471	17.124	0.701131	1.746	0.293639	1.1442	0.143131	191.2	50.8543	1.016	0.471491	2.674	0.951916	96.9276	53.9622	1.32e-07	2.26e-07	19.6159	31.7996	1258.12	1490.95	503.83	725.272	92.76	75.7382	5.1852	8.48933
752	Lu1In1O3	Pm-3m	221	cubic	1.003	8.29465	-2.01	67.6222	5	4.07408	4.07408	4.07408	90	90	90	28.8	26.4076	15.6	1.35647	3.8	2.4	67.5566	65.9471	17.124	0.701131	1.746	0.293639	1.1442	0.143131	191.2	50.8543	1.016	0.471491	2.674	0.951916	96.9276	53.9622	1.32e-07	2.26e-07	19.6159	31.7996	1258.12	1490.95	503.83	725.272	92.76	75.7382	5.1852	8.48933
753	Dy1Ho1O3	Pm-3m	221	cubic	1.198	5.09411	-2.956	122.379	5	4.96481	4.96481	4.96481	90	90	90	31.4	28.6608	14.6	1.74356	4.4	2.93939	75.0857	72.3697	17.966	0.74709	1.834	0.384583	1.1904	0.0898679	202.8	64.6696	1.102	0.565841	2.554	1.08513	84.5856	69.0639	3.48e-07	4.28e-07	5.41595	6.78734	1220.72	1385.44	715.68	809.59	92.76	75.7382	5.7532	7.02654
754	Dy1Ho1O3	Pm-3m	221	cubic	1.199	8.18158	-2.956	76.1973	5	4.23949	4.23949	4.23949	90	90	90	31.4	28.6608	14.6	1.74356	4.4	2.93939	75.0857	72.3697	17.966	0.74709	1.834	0.384583	1.1904	0.0898679	202.8	64.6696	1.102	0.565841	2.554	1.08513	84.5856	69.0639	3.48e-07	4.28e-07	5.41595	6.78734	1220.72	1385.44	715.68	809.59	92.76	75.7382	5.7532	7.02654
755	Dy1Ho1O3	Pm-3m	221	cubic	1.635	8.21645	-2.956	75.8739	5	4.23348	4.23348	4.23348	90	90	90	31.4	28.6608	14.6	1.74356	4.4	2.93939	75.0857	72.3697	17.966	0.74709	1.834	0.384583	1.1904	0.0898679	202.8	64.6696	1.102	0.565841	2.554	1.08513	84.5856	69.0639	3.48e-07	4.28e-07	5.41595	6.78734	1220.72	1385.44	715.68	809.59	92.76	75.7382	5.7532	7.02654
756	Nd1Dy1O3	Pm-3m	221	cubic	0.349	4.69664	-3.089	125.422	5	5.00561	5.00561	5.00561	90	90	90	30	27.0111	13.2	3.91918	4.4	2.93939	70.948	67.5453	18.336	1.29557	1.852	0.407402	1.2375	0.0536321	205.2	67.7507	1.12	0.588422	2.536	1.10746	84.5856	69.0639	3.14e-07	3.95e-07	5.61595	7.10363	1296.72	1487.26	628.28	712.733	92.76	75.7382	3.7732	4.52952
757	Nd1Dy1O3	Pm-3m	221	cubic	1.105	4.69664	-3.089	125.422	5	5.00561	5.00561	5.00561	90	90	90	30	27.0111	13.2	3.91918	4.4	2.93939	70.948	67.5453	18.336	1.29557	1.852	0.407402	1.2375	0.0536321	205.2	67.7507	1.12	0.588422	2.536	1.10746	84.5856	69.0639	3.14e-07	3.95e-07	5.61595	7.10363	1296.72	1487.26	628.28	712.733	92.76	75.7382	3.7732	4.52952
758	Nd1Dy1O3	Pm-3m	221	cubic	1.105	7.48816	-3.089	78.6655	5	4.28478	4.28478	4.28478	90	90	90	30	27.0111	13.2	3.91918	4.4	2.93939	70.948	67.5453	18.336	1.29557	1.852	0.407402	1.2375	0.0536321	205.2	67.7507	1.12	0.588422	2.536	1.10746	84.5856	69.0639	3.14e-07	3.95e-07	5.61595	7.10363	1296.72	1487.26	628.28	712.733	92.76	75.7382	3.7732	4.52952
759	Nd1Dy1O3	Pm-3m	221	cubic	1.717	7.50768	-3.089	78.461	5	4.28106	4.28106	4.28106	90	90	90	30	27.0111	13.2	3.91918	4.4	2.93939	70.948	67.5453	18.336	1.29557	1.852	0.407402	1.2375	0.0536321	205.2	67.7507	1.12	0.588422	2.536	1.10746	84.5856	69.0639	3.14e-07	3.95e-07	5.61595	7.10363	1296.72	1487.26	628.28	712.733	92.76	75.7382	3.7732	4.52952
760	Mg1Np1O3	Pm-3m	221	cubic	0.381	5.02788	-2.767	102.152	5	4.67465	4.67465	4.67465	90	90	90	25.8	33.6357	11.4	5.8515	3.6	2.72764	61.8606	87.6287	15.534	2.36267	1.736	0.336963	1.128	0.167619	194.2	54.4661	1.024	0.487015	2.598	1.03136	84.5856	69.0639	2.49e-07	4.76e-07	33.2159	63.4342	1181.32	1622.54	399.48	422.165	92.76	75.7382	3.8732	4.49064
761	Hf1Mg1O3	Pm-3m	221	cubic	0.548	3.9596	-2.321	105.175	5	4.72032	4.72032	4.72032	90	90	90	21.6	25.2476	10.8	6.4	3	1.54919	50.1586	64.2463	15.904	1.792	1.704	0.275289	1.098	0.198434	190.8	49.9736	0.992	0.43774	2.59	1.04104	84.8558	68.7343	7.68e-08	1.33e-07	36.6159	62.3304	1301.92	1853.78	718.68	954.827	92.76	75.7382	6.9732	9.82813
762	Hf1Mg1O3	Pm-3m	221	cubic	0.685	8.13667	-2.321	51.1821	5	3.71284	3.71284	3.71284	90	90	90	21.6	25.2476	10.8	6.4	3	1.54919	50.1586	64.2463	15.904	1.792	1.704	0.275289	1.098	0.198434	190.8	49.9736	0.992	0.43774	2.59	1.04104	84.8558	68.7343	7.68e-08	1.33e-07	36.6159	62.3304	1301.92	1853.78	718.68	954.827	92.76	75.7382	6.9732	9.82813
763	Hf1Mg1O3	Pm-3m	221	cubic	1.023	8.34032	-2.321	49.9324	5	3.68237	3.68237	3.68237	90	90	90	21.6	25.2476	10.8	6.4	3	1.54919	50.1586	64.2463	15.904	1.792	1.704	0.275289	1.098	0.198434	190.8	49.9736	0.992	0.43774	2.59	1.04104	84.8558	68.7343	7.68e-08	1.33e-07	36.6159	62.3304	1301.92	1853.78	718.68	954.827	92.76	75.7382	6.9732	9.82813
764	Ce1In1O3	Pm-3m	221	cubic	1.422	4.18739	-2.358	120.13	5	4.9342	4.9342	4.9342	90	90	90	26.2	22.4713	13	4.64758	3.8	2.4	60.5864	55.1906	17.706	1.61557	1.782	0.356337	1.16	0.130231	196.2	58.3452	1.036	0.502856	2.644	0.996987	102.91	47.8326	1.64e-07	2.9e-07	18.6159	31.9757	1249.72	1477.37	332.43	395.416	92.76	75.7382	1.8852	2.15664
765	Ce1In1O3	Pm-3m	221	cubic	1.654	7.17333	-2.358	70.1251	5	4.12374	4.12374	4.12374	90	90	90	26.2	22.4713	13	4.64758	3.8	2.4	60.5864	55.1906	17.706	1.61557	1.782	0.356337	1.16	0.130231	196.2	58.3452	1.036	0.502856	2.644	0.996987	102.91	47.8326	1.64e-07	2.9e-07	18.6159	31.9757	1249.72	1477.37	332.43	395.416	92.76	75.7382	1.8852	2.15664
766	Ce1In1O3	Pm-3m	221	cubic	1.917	7.1133	-2.358	70.7169	5	4.13531	4.13531	4.13531	90	90	90	26.2	22.4713	13	4.64758	3.8	2.4	60.5864	55.1906	17.706	1.61557	1.782	0.356337	1.16	0.130231	196.2	58.3452	1.036	0.502856	2.644	0.996987	102.91	47.8326	1.64e-07	2.9e-07	18.6159	31.9757	1249.72	1477.37	332.43	395.416	92.76	75.7382	1.8852	2.15664
767	La1Gd1O3	Pm-3m	221	cubic	0.775	6.83839	-3.149	83.5695	5	4.37202	4.37202	4.37202	90	90	90	29	25.8147	12.2	5.15364	4.4	2.93939	68.8307	64.9644	18.874	2.01452	1.866	0.424716	1.2054	0.0735706	205.4	68.1164	1.136	0.608658	2.526	1.11996	93.6556	59.7034	3.85e-07	5.2e-07	4.81595	5.89975	1507.32	1737	588.48	665.273	92.76	75.7382	3.3732	4.04216
768	La1Gd1O3	Pm-3m	221	cubic	1.629	6.95224	-3.149	82.2009	5	4.34803	4.34803	4.34803	90	90	90	29	25.8147	12.2	5.15364	4.4	2.93939	68.8307	64.9644	18.874	2.01452	1.866	0.424716	1.2054	0.0735706	205.4	68.1164	1.136	0.608658	2.526	1.11996	93.6556	59.7034	3.85e-07	5.2e-07	4.81595	5.89975	1507.32	1737	588.48	665.273	92.76	75.7382	3.3732	4.04216
769	Gd1Lu1O3	Pm-3m	221	cubic	1.598	5.16324	-3.203	122.28	5	4.96347	4.96347	4.96347	90	90	90	31.8	29.2329	15	2.52982	4.4	2.93939	76.043	73.7513	17.952	0.98749	1.828	0.378545	1.1712	0.111246	198.4	59.4932	1.096	0.559056	2.56	1.07794	91.1476	61.9028	3.78e-07	5.17e-07	5.41595	6.78734	1493.72	1719.63	734.88	839.835	92.76	75.7382	6.5332	8.61086
770	Gd1Lu1O3	Pm-3m	221	cubic	1.494	8.73226	-3.203	72.3023	5	4.16598	4.16598	4.16598	90	90	90	31.8	29.2329	15	2.52982	4.4	2.93939	76.043	73.7513	17.952	0.98749	1.828	0.378545	1.1712	0.111246	198.4	59.4932	1.096	0.559056	2.56	1.07794	91.1476	61.9028	3.78e-07	5.17e-07	5.41595	6.78734	1493.72	1719.63	734.88	839.835	92.76	75.7382	6.5332	8.61086
771	Gd1Lu1O3	Pm-3m	221	cubic	2.025	8.82292	-3.203	71.5593	5	4.15166	4.15166	4.15166	90	90	90	31.8	29.2329	15	2.52982	4.4	2.93939	76.043	73.7513	17.952	0.98749	1.828	0.378545	1.1712	0.111246	198.4	59.4932	1.096	0.559056	2.56	1.07794	91.1476	61.9028	3.78e-07	5.17e-07	5.41595	6.78734	1493.72	1719.63	734.88	839.835	92.76	75.7382	6.5332	8.61086
772	Ac1Gd1O3	Pm-3m	221	cubic	0.299	5.51349	-3.294	130.183	5	5.06818	5.06818	5.06818	90	90	90	35.4	34.4767	12.2	5.15364	4.6	3.2	86.4496	89.0582	18.906	2.07061	1.874	0.435504	1.223	0.074	202.4	64.1891	1.15	0.627503	2.524	1.12251	91.3396	61.7228	2.62e-07	5.24e-07	4.61595	5.62969	1473.32	1694.04	614.48	690.454	92.76	75.7382	4.9332	5.90704
773	Ac1Gd1O3	Pm-3m	221	cubic	1.927	5.51349	-3.294	130.183	5	5.06818	5.06818	5.06818	90	90	90	35.4	34.4767	12.2	5.15364	4.6	3.2	86.4496	89.0582	18.906	2.07061	1.874	0.435504	1.223	0.074	202.4	64.1891	1.15	0.627503	2.524	1.12251	91.3396	61.7228	2.62e-07	5.24e-07	4.61595	5.62969	1473.32	1694.04	614.48	690.454	92.76	75.7382	4.9332	5.90704
774	Ac1Gd1O3	Pm-3m	221	cubic	1.928	8.55677	-3.294	83.8827	5	4.37748	4.37748	4.37748	90	90	90	35.4	34.4767	12.2	5.15364	4.6	3.2	86.4496	89.0582	18.906	2.07061	1.874	0.435504	1.223	0.074	202.4	64.1891	1.15	0.627503	2.524	1.12251	91.3396	61.7228	2.62e-07	5.24e-07	4.61595	5.62969	1473.32	1694.04	614.48	690.454	92.76	75.7382	4.9332	5.90704
775	Ac1Gd1O3	Pm-3m	221	cubic	2.559	8.5851	-3.294	83.6059	5	4.37266	4.37266	4.37266	90	90	90	35.4	34.4767	12.2	5.15364	4.6	3.2	86.4496	89.0582	18.906	2.07061	1.874	0.435504	1.223	0.074	202.4	64.1891	1.15	0.627503	2.524	1.12251	91.3396	61.7228	2.62e-07	5.24e-07	4.61595	5.62969	1473.32	1694.04	614.48	690.454	92.76	75.7382	4.9332	5.90704
776	Gd1Dy1O3	Pm-3m	221	cubic	0.766	4.91228	-2.789	124.313	5	4.99082	4.99082	4.99082	90	90	90	30.8	27.9313	14	2.52982	4.4	2.93939	73.5496	70.5039	18.198	1.06423	1.842	0.394482	1.1972	0.0789263	202	63.6899	1.108	0.573215	2.55	1.09003	84.5856	69.0639	4.47e-07	5.61e-07	4.41595	5.37586	1326.72	1529.75	685.88	773.496	92.76	75.7382	4.3532	5.07161
777	Gd1Dy1O3	Pm-3m	221	cubic	0.761	7.63781	-2.789	79.9523	5	4.30801	4.30801	4.30801	90	90	90	30.8	27.9313	14	2.52982	4.4	2.93939	73.5496	70.5039	18.198	1.06423	1.842	0.394482	1.1972	0.0789263	202	63.6899	1.108	0.573215	2.55	1.09003	84.5856	69.0639	4.47e-07	5.61e-07	4.41595	5.37586	1326.72	1529.75	685.88	773.496	92.76	75.7382	4.3532	5.07161
778	Gd1Dy1O3	Pm-3m	221	cubic	1.301	7.65955	-2.789	79.7254	5	4.30393	4.30393	4.30393	90	90	90	30.8	27.9313	14	2.52982	4.4	2.93939	73.5496	70.5039	18.198	1.06423	1.842	0.394482	1.1972	0.0789263	202	63.6899	1.108	0.573215	2.55	1.09003	84.5856	69.0639	4.47e-07	5.61e-07	4.41595	5.37586	1326.72	1529.75	685.88	773.496	92.76	75.7382	4.3532	5.07161
779	Dy1Lu1O3	Pm-3m	221	cubic	0.487	5.30014	-2.753	120.767	5	4.9429	4.9429	4.9429	90	90	90	32.2	29.681	15.4	1.74356	4.4	2.93939	77.093	74.9279	17.774	0.639049	1.822	0.370535	1.1824	0.10355	198.8	60.038	1.092	0.55391	2.562	1.07544	91.1476	61.9028	3.01e-07	3.85e-07	5.41595	6.78734	1357.12	1573.96	753.88	859.693	92.76	75.7382	6.7532	8.7101
780	Dy1Lu1O3	Pm-3m	221	cubic	0.366	8.37384	-2.753	76.4381	5	4.24395	4.24395	4.24395	90	90	90	32.2	29.681	15.4	1.74356	4.4	2.93939	77.093	74.9279	17.774	0.639049	1.822	0.370535	1.1824	0.10355	198.8	60.038	1.092	0.55391	2.562	1.07544	91.1476	61.9028	3.01e-07	3.85e-07	5.41595	6.78734	1357.12	1573.96	753.88	859.693	92.76	75.7382	6.7532	8.7101
781	Dy1Lu1O3	Pm-3m	221	cubic	0.659	8.38008	-2.753	76.3811	5	4.24289	4.24289	4.24289	90	90	90	32.2	29.681	15.4	1.74356	4.4	2.93939	77.093	74.9279	17.774	0.639049	1.822	0.370535	1.1824	0.10355	198.8	60.038	1.092	0.55391	2.562	1.07544	91.1476	61.9028	3.01e-07	3.85e-07	5.41595	6.78734	1357.12	1573.96	753.88	859.693	92.76	75.7382	6.7532	8.7101
782	Ho1Er1O3	Pm-3m	221	cubic	1.263	5.19795	-2.975	121.455	5	4.95228	4.95228	4.95228	90	90	90	31.8	29.1506	15	1.26491	4.4	2.93939	76.0375	73.535	17.856	0.613892	1.83	0.379684	1.1702	0.110037	202.4	64.1891	1.096	0.558519	2.558	1.08023	84.5856	69.0639	3.35e-07	4.1e-07	6.21595	7.58699	1280.92	1459.08	740.08	839.569	92.76	75.7382	7.5132	8.97683
783	Ho1Er1O3	Pm-3m	221	cubic	1.228	8.39329	-2.975	75.2168	5	4.22122	4.22122	4.22122	90	90	90	31.8	29.1506	15	1.26491	4.4	2.93939	76.0375	73.535	17.856	0.613892	1.83	0.379684	1.1702	0.110037	202.4	64.1891	1.096	0.558519	2.558	1.08023	84.5856	69.0639	3.35e-07	4.1e-07	6.21595	7.58699	1280.92	1459.08	740.08	839.569	92.76	75.7382	7.5132	8.97683
784	Ho1Er1O3	Pm-3m	221	cubic	1.676	8.46904	-2.975	74.544	5	4.2086	4.2086	4.2086	90	90	90	31.8	29.1506	15	1.26491	4.4	2.93939	76.0375	73.535	17.856	0.613892	1.83	0.379684	1.1702	0.110037	202.4	64.1891	1.096	0.558519	2.558	1.08023	84.5856	69.0639	3.35e-07	4.1e-07	6.21595	7.58699	1280.92	1459.08	740.08	839.569	92.76	75.7382	7.5132	8.97683
788	Nd1Al1O3	Pm-3m	221	cubic	2.59	3.29517	-3.485	110.473	5	4.79827	4.79827	4.79827	90	90	90	19.4	20.3922	13.4	3.87814	3.4	2.33238	43.8443	50.3787	16.534	3.49832	1.758	0.339435	1.1463	0.235737	194	58.258	1.008	0.494061	2.614	1.0225	92.938	60.2983	1.34e-07	2.55e-07	50.4159	92.5258	1287.12	1477.39	478.974	532.072	92.76	75.7382	3.6932	4.40112
789	Nd1Al1O3	Pm-3m	221	cubic	2.758	6.79576	-3.485	53.5667	5	3.76963	3.76963	3.76963	90	90	90	19.4	20.3922	13.4	3.87814	3.4	2.33238	43.8443	50.3787	16.534	3.49832	1.758	0.339435	1.1463	0.235737	194	58.258	1.008	0.494061	2.614	1.0225	92.938	60.2983	1.34e-07	2.55e-07	50.4159	92.5258	1287.12	1477.39	478.974	532.072	92.76	75.7382	3.6932	4.40112
790	Nd1Al1O3	Pm-3m	221	cubic	3.087	6.92079	-3.485	52.5989	5	3.74679	3.74679	3.74679	90	90	90	19.4	20.3922	13.4	3.87814	3.4	2.33238	43.8443	50.3787	16.534	3.49832	1.758	0.339435	1.1463	0.235737	194	58.258	1.008	0.494061	2.614	1.0225	92.938	60.2983	1.34e-07	2.55e-07	50.4159	92.5258	1287.12	1477.39	478.974	532.072	92.76	75.7382	3.6932	4.40112
791	Bi1B1O3	Pm-3m	221	cubic	2.087	4.32804	-1.178	102.743	5	4.68364	4.68364	4.68364	90	90	90	22.4	30.3223	15.2	1.16619	2.8	1.6	53.5579	77.7372	15.556	5.78881	1.71	0.237487	1.045	0.329242	184.4	50.492	0.852	0.333131	2.876	0.690785	108.168	44.9811	200000000000	400000000000	7.01595	10.4583	1261.52	1617.52	611.56	889.174	92.76	75.7382	12.3132	19.2919
792	Bi1B1O3	Pm-3m	221	cubic	2.093	9.67391	-1.178	45.9664	5	3.58218	3.58218	3.58218	90	90	90	22.4	30.3223	15.2	1.16619	2.8	1.6	53.5579	77.7372	15.556	5.78881	1.71	0.237487	1.045	0.329242	184.4	50.492	0.852	0.333131	2.876	0.690785	108.168	44.9811	200000000000	400000000000	7.01595	10.4583	1261.52	1617.52	611.56	889.174	92.76	75.7382	12.3132	19.2919
793	Bi1B1O3	Pm-3m	221	cubic	2.443	9.89145	-1.178	44.9555	5	3.55572	3.55572	3.55572	90	90	90	22.4	30.3223	15.2	1.16619	2.8	1.6	53.5579	77.7372	15.556	5.78881	1.71	0.237487	1.045	0.329242	184.4	50.492	0.852	0.333131	2.876	0.690785	108.168	44.9811	200000000000	400000000000	7.01595	10.4583	1261.52	1617.52	611.56	889.174	92.76	75.7382	12.3132	19.2919
794	Ce1Fe1O3	Pm-3m	221	cubic	0.348	6.85078	-2.57	59.1325	5	3.89591	3.89591	3.89591	90	90	90	21.6	19.4895	12	5.05964	3.6	2.33238	48.7918	48.1993	15.972	4.62448	1.804	0.368	1.1425	0.160888	196.4	58.5068	1	0.48	2.654	0.988486	100.043	52.3934	1.68e-07	2.89e-07	18.2159	31.183	1407.52	1621.08	608.68	717.899	92.76	75.7382	3.9932	5.31243
795	Ho1Lu1O3	Pm-3m	221	cubic	0.609	5.35219	-2.808	120.346	5	4.93716	4.93716	4.93716	90	90	90	32.4	29.9105	15.6	1.35647	4.4	2.93939	77.5791	75.4862	17.72	0.535313	1.82	0.367913	1.1644	0.117767	199.2	60.5884	1.09	0.551362	2.564	1.07295	91.1476	61.9028	2.79e-07	3.49e-07	6.41595	7.82535	1387.72	1603.7	764.68	871.517	92.76	75.7382	7.9332	9.57569
796	Ho1Lu1O3	Pm-3m	221	cubic	0.613	8.5317	-2.808	75.4968	5	4.22645	4.22645	4.22645	90	90	90	32.4	29.9105	15.6	1.35647	4.4	2.93939	77.5791	75.4862	17.72	0.535313	1.82	0.367913	1.1644	0.117767	199.2	60.5884	1.09	0.551362	2.564	1.07295	91.1476	61.9028	2.79e-07	3.49e-07	6.41595	7.82535	1387.72	1603.7	764.68	871.517	92.76	75.7382	7.9332	9.57569
797	Ho1Lu1O3	Pm-3m	221	cubic	0.782	8.57942	-2.808	75.0768	5	4.2186	4.2186	4.2186	90	90	90	32.4	29.9105	15.6	1.35647	4.4	2.93939	77.5791	75.4862	17.72	0.535313	1.82	0.367913	1.1644	0.117767	199.2	60.5884	1.09	0.551362	2.564	1.07295	91.1476	61.9028	2.79e-07	3.49e-07	6.41595	7.82535	1387.72	1603.7	764.68	871.517	92.76	75.7382	7.9332	9.57569
798	Er1Cr1O3	Pm-3m	221	cubic	1.493	4.33395	-2.848	102.397	5	4.67839	4.67839	4.67839	90	90	90	23.2	23.2413	13.6	3.87814	3.6	2.33238	53.4507	58.5871	15.554	4.18375	1.782	0.329023	1.15	0.137695	194.8	55.9121	0.998	0.462964	2.644	0.983902	97.4456	57.0596	1.97e-07	3.35e-07	21.8159	36.555	1271.12	1447.67	829.28	956.043	92.76	75.7382	8.2132	9.78902
799	Er1Cr1O3	Pm-3m	221	cubic	1.501	7.91787	-2.848	56.0485	5	3.82697	3.82697	3.82697	90	90	90	23.2	23.2413	13.6	3.87814	3.6	2.33238	53.4507	58.5871	15.554	4.18375	1.782	0.329023	1.15	0.137695	194.8	55.9121	0.998	0.462964	2.644	0.983902	97.4456	57.0596	1.97e-07	3.35e-07	21.8159	36.555	1271.12	1447.67	829.28	956.043	92.76	75.7382	8.2132	9.78902
800	Er1Cr1O3	Pm-3m	221	cubic	1.806	8.02915	-2.848	55.2717	5	3.8092	3.8092	3.8092	90	90	90	23.2	23.2413	13.6	3.87814	3.6	2.33238	53.4507	58.5871	15.554	4.18375	1.782	0.329023	1.15	0.137695	194.8	55.9121	0.998	0.462964	2.644	0.983902	97.4456	57.0596	1.97e-07	3.35e-07	21.8159	36.555	1271.12	1447.67	829.28	956.043	92.76	75.7382	8.2132	9.78902
802	Ce1Nd1O3	Pm-3m	221	cubic	0.487	4.30397	-2.776	128.228	5	5.04268	5.04268	5.04268	90	90	90	28.4	24.9928	11.6	5.42586	4.4	2.93939	66.4712	61.8289	18.672	1.60718	1.874	0.433663	1.2273	0.0739267	206.6	69.3559	1.128	0.597809	2.516	1.13168	97.1296	57.2463	2.77e-07	3.4e-07	5.61595	7.10363	1455.32	1673.94	505.88	557.184	92.76	75.7382	2.6532	3.02028
803	Ce1Nd1O3	Pm-3m	221	cubic	0.453	4.30397	-2.776	128.228	5	5.04268	5.04268	5.04268	90	90	90	28.4	24.9928	11.6	5.42586	4.4	2.93939	66.4712	61.8289	18.672	1.60718	1.874	0.433663	1.2273	0.0739267	206.6	69.3559	1.128	0.597809	2.516	1.13168	97.1296	57.2463	2.77e-07	3.4e-07	5.61595	7.10363	1455.32	1673.94	505.88	557.184	92.76	75.7382	2.6532	3.02028
804	Ce1Nd1O3	Pm-3m	221	cubic	0.581	6.23137	-2.776	88.5664	5	4.45748	4.45748	4.45748	90	90	90	28.4	24.9928	11.6	5.42586	4.4	2.93939	66.4712	61.8289	18.672	1.60718	1.874	0.433663	1.2273	0.0739267	206.6	69.3559	1.128	0.597809	2.516	1.13168	97.1296	57.2463	2.77e-07	3.4e-07	5.61595	7.10363	1455.32	1673.94	505.88	557.184	92.76	75.7382	2.6532	3.02028
805	Ce1Nd1O3	Pm-3m	221	cubic	1.066	6.19311	-2.776	89.1136	5	4.46664	4.46664	4.46664	90	90	90	28.4	24.9928	11.6	5.42586	4.4	2.93939	66.4712	61.8289	18.672	1.60718	1.874	0.433663	1.2273	0.0739267	206.6	69.3559	1.128	0.597809	2.516	1.13168	97.1296	57.2463	2.77e-07	3.4e-07	5.61595	7.10363	1455.32	1673.94	505.88	557.184	92.76	75.7382	2.6532	3.02028
806	Dy1Al1O3	Pm-3m	221	cubic	2.741	3.65639	-3.459	107.851	5	4.76001	4.76001	4.76001	90	90	90	20.6	22.7824	14.6	1.74356	3.4	2.33238	47.4959	57.6591	16.218	3.174	1.742	0.309864	1.1172	0.226675	191.2	53.4767	0.992	0.466064	2.63	0.99968	92.938	60.2983	1.91e-07	3.68e-07	49.2159	92.9892	1180.52	1335.45	555.574	657.185	92.76	75.7382	4.4932	5.23266
807	Dy1Al1O3	Pm-3m	221	cubic	2.755	7.73344	-3.459	50.9921	5	3.70824	3.70824	3.70824	90	90	90	20.6	22.7824	14.6	1.74356	3.4	2.33238	47.4959	57.6591	16.218	3.174	1.742	0.309864	1.1172	0.226675	191.2	53.4767	0.992	0.466064	2.63	0.99968	92.938	60.2983	1.91e-07	3.68e-07	49.2159	92.9892	1180.52	1335.45	555.574	657.185	92.76	75.7382	4.4932	5.23266
808	Dy1Al1O3	Pm-3m	221	cubic	3.135	7.89527	-3.459	49.9469	5	3.68273	3.68273	3.68273	90	90	90	20.6	22.7824	14.6	1.74356	3.4	2.33238	47.4959	57.6591	16.218	3.174	1.742	0.309864	1.1172	0.226675	191.2	53.4767	0.992	0.466064	2.63	0.99968	92.938	60.2983	1.91e-07	3.68e-07	49.2159	92.9892	1180.52	1335.45	555.574	657.185	92.76	75.7382	4.4932	5.23266
809	Hf1Mg1O3	Pm-3m	221	cubic	1.009	6.29698	-2.878	66.1352	5	4.044	4.044	4.044	90	90	90	21.6	25.2476	10.8	6.4	3	1.54919	50.1586	64.2463	15.904	1.792	1.704	0.275289	1.098	0.198434	190.8	49.9736	0.992	0.43774	2.59	1.04104	84.8558	68.7343	7.68e-08	1.33e-07	36.6159	62.3304	1301.92	1853.78	718.68	954.827	92.76	75.7382	6.9732	9.82813
810	Hf1Mg1O3	Pm-3m	221	cubic	1.042	8.34188	-2.321	49.923	5	3.68214	3.68214	3.68214	90	90	90	21.6	25.2476	10.8	6.4	3	1.54919	50.1586	64.2463	15.904	1.792	1.704	0.275289	1.098	0.198434	190.8	49.9736	0.992	0.43774	2.59	1.04104	84.8558	68.7343	7.68e-08	1.33e-07	36.6159	62.3304	1301.92	1853.78	718.68	954.827	92.76	75.7382	6.9732	9.82813
811	Mg1Ge1O3	Pm-3m	221	cubic	1.576	4.79653	-1.882	50.1787	5	3.68842	3.68842	3.68842	90	90	90	13.6	9.32952	12.8	5.45527	2.6	0.8	28.9886	22.0615	15.942	1.74063	1.68	0.22987	1.082	0.219854	186	44.6363	0.904	0.32946	2.728	0.899675	108.373	54.8547	0.000100009	0.000199996	44.0159	62.4708	945.32	1181.58	459.76	504.288	92.76	75.7382	8.2332	12.2323
812	Mg4Ge4O12	C2/c	15	monoclinic	2.874	4.45968	-2.404	215.875	20	5.1596	6.53316	6.53316	94.2349	97.7451	82.2549	13.6	9.32952	12.8	5.45527	2.6	0.8	28.9886	22.0615	15.942	1.74063	1.68	0.22987	1.082	0.219854	186	44.6363	0.904	0.32946	2.728	0.899675	108.373	54.8547	0.000100009	0.000199996	44.0159	62.4708	945.32	1181.58	459.76	504.288	92.76	75.7382	8.2332	12.2323
813	Ho1B1O3	Pm-3m	221	cubic	3.018	3.77191	-2.528	98.4988	5	4.61824	4.61824	4.61824	90	90	90	19.2	23.9282	14.8	1.46969	3.2	2.4	44.7479	60.1248	15.042	5.35275	1.756	0.313024	1.0462	0.329214	185	51.6294	0.91	0.446766	2.718	0.920617	89.9834	63.0334	200000000000	400000000000	8.61595	11.08	1492.72	1759.62	849.48	992.521	92.76	75.7382	13.5332	19.3567
814	Ac1As1O3	Pm-3m	221	cubic	0.301	4.89713	-2.291	118.652	5	4.91389	4.91389	4.91389	90	90	90	29.2	31.4286	13.2	5.11468	3.8	2.71293	69.984	81.7575	17.516	3.04179	1.776	0.369789	1.14	0.24	184.2	51.5457	1.026	0.537684	2.718	0.949071	106.854	44.0267	6.6e-08	1.32e-07	12.4159	19.3557	946.12	1349.21	515.48	569.006	432.76	636.443	8.4732	10.9951
815	Hf1Co1O3	Pm-3m	221	cubic	0.429	5.09613	-2.152	93.0026	5	4.5307	4.5307	4.5307	90	90	90	24.6	24.8161	12.2	4.91528	3.2	1.6	57.0843	62.9391	14.438	4.17018	1.758	0.300426	1.07967	0.222367	188.6	47.4536	0.948	0.404297	2.704	0.918642	97.6304	56.6495	8e-08	1.32e-07	24.6159	38.728	1669.32	2005.32	887.68	1046.42	92.76	75.7382	8.4732	10.5248
816	Nd1Er1O3	Pm-3m	221	cubic	1.857	4.79499	-3.182	124.497	5	4.99329	4.99329	4.99329	90	90	90	30.4	27.5507	13.6	3.87814	4.4	2.93939	71.8998	68.8496	18.226	1.25643	1.848	0.402959	1.2173	0.0938678	204.8	67.3065	1.114	0.58157	2.54	1.10272	84.5856	69.0639	3.01e-07	3.74e-07	6.41595	7.85086	1356.92	1553.14	652.68	749.462	92.76	75.7382	5.5332	7.66141
817	Er1B1O3	Pm-3m	221	cubic	3.065	3.83077	-2.53	97.9948	5	4.61035	4.61035	4.61035	90	90	90	19.4	24.3278	15	1.26491	3.2	2.4	45.2136	61.0558	14.986	5.3151	1.754	0.309555	1.044	0.329278	184.2	50.1135	0.906	0.43889	2.72	0.917388	89.9834	63.0334	200000000000	400000000000	8.41595	10.9532	1522.32	1785.67	863.08	1004.94	92.76	75.7382	14.1132	19.4948
819	Dy1B1O3	Pm-3m	221	cubic	2.97	3.71508	-2.526	98.9191	5	4.6248	4.6248	4.6248	90	90	90	19	23.5287	14.6	1.74356	3.2	2.4	44.2618	59.1532	15.096	5.39101	1.758	0.316506	1.0642	0.330894	184.6	50.8708	0.912	0.450706	2.716	0.923853	89.9834	63.0334	200000000000	400000000000	7.61595	10.5829	1462.12	1734.42	838.68	983.086	92.76	75.7382	12.3532	19.2891
820	La1Cr1O3	Pm-3m	221	cubic	1.76	3.62964	-3.083	109.295	5	4.78117	4.78117	4.78117	90	90	90	21	19.0368	11.4	5.71314	3.6	2.33238	47.78	47.648	16.34	4.95411	1.81	0.373952	1.1784	0.123977	198.6	61.8372	1.032	0.521014	2.616	1.02461	106.516	42.6285	1.48e-07	2.38e-07	21.4159	36.6382	1391.52	1613.69	707.48	858.14	92.76	75.7382	5.4732	7.86204
821	La1Fe1O3	Pm-3m	221	cubic	0.401	3.69821	-2.657	108.997	5	4.77681	4.77681	4.77681	90	90	90	21.4	19.1165	11.8	5.38145	3.6	2.33238	48.5497	47.7409	16.312	5.00564	1.806	0.371354	1.1609	0.157922	198.4	61.6882	1.02	0.515364	2.65	0.994706	96.5694	55.2509	1.43e-07	2.39e-07	18.6159	31.1006	1429.52	1651.59	633.68	735.422	92.76	75.7382	4.1332	5.35931
822	Ce1Fe1O3	Pm-3m	221	cubic	0.491	3.82789	-2.57	105.83	5	4.73009	4.73009	4.73009	90	90	90	21.6	19.4895	12	5.05964	3.6	2.33238	48.7918	48.1993	15.972	4.62448	1.804	0.368	1.1425	0.160888	196.4	58.5068	1	0.48	2.654	0.988486	100.043	52.3934	1.68e-07	2.89e-07	18.2159	31.183	1407.52	1621.08	608.68	717.899	92.76	75.7382	3.9932	5.31243
823	Er1Al1O3	Pm-3m	221	cubic	3.34	7.97926	-3.435	50.4115	5	3.69411	3.69411	3.69411	90	90	90	21	23.5797	15	1.26491	3.4	2.33238	48.4477	59.5577	16.108	3.08357	1.738	0.302549	1.097	0.229033	190.8	52.8068	0.986	0.455702	2.634	0.994054	92.938	60.2983	1.77e-07	3.41e-07	50.0159	92.6736	1240.72	1413.41	579.974	699.39	92.76	75.7382	6.2532	7.93896
824	La1As1O3	Pm-3m	221	cubic	0.344	6.34461	-2.2	68.526	5	4.09215	4.09215	4.09215	90	90	90	22.8	19.651	13.2	5.11468	3.6	2.33238	52.3651	48.9192	17.484	2.98905	1.768	0.354818	1.1224	0.233699	187.2	57.3215	1.012	0.512187	2.72	0.945643	109.17	40.2652	1.89e-07	2.48e-07	12.6159	19.3556	980.12	1415.49	489.48	533.368	432.76	636.443	6.9132	10.6482
825	Gd1B1O3	Pm-3m	221	cubic	3.04	8.33977	-2.513	43.0197	5	3.50393	3.50393	3.50393	90	90	90	18.6	22.7297	14.2	2.4	3.2	2.4	43.2118	57.0545	15.274	5.5302	1.764	0.327023	1.053	0.329387	184.2	50.1135	0.916	0.458589	2.714	0.927094	89.9834	63.0334	200000000000	400000000000	7.61595	10.5829	1598.72	1859.91	819.68	967.436	92.76	75.7382	12.1332	19.3084
826	Ce1Al1O3	Pm-3m	221	cubic	3.202	6.45392	-3.47	55.3423	5	3.81082	3.81082	3.81082	90	90	90	19	19.5959	13	4.64758	3.4	2.33238	43.0191	48.7344	16.554	3.52166	1.764	0.350634	1.107	0.226971	192.6	55.8484	1	0.48	2.61	1.02828	105.482	43.9734	1.53e-07	2.93e-07	49.2159	92.9892	1339.12	1552.56	433.174	465.36	92.76	75.7382	3.3732	4.19513
827	Lu1Al1O3	Pm-3m	221	cubic	3.37	8.36469	-3.388	49.6188	5	3.67465	3.67465	3.67465	90	90	90	21.6	24.7758	15.6	1.35647	3.4	2.33238	49.9893	62.6334	15.972	2.99043	1.728	0.284422	1.0912	0.231015	187.6	47.5924	0.98	0.445421	2.64	0.985677	99.5	50.8763	1.21e-07	2.3e-07	50.2159	92.5989	1347.52	1565.01	604.574	742.759	92.76	75.7382	6.6732	8.67156
828	Ac1Fe1O3	Pm-3m	221	cubic	0.45	8.51931	-2.707	64.4862	5	4.0101	4.0101	4.0101	90	90	90	27.8	31.3841	11.8	5.38145	3.8	2.71293	66.1686	81.883	16.344	5.04475	1.814	0.384895	1.1785	0.163	195.4	56.9547	1.034	0.540503	2.648	0.997826	94.2534	57.5445	2e-08	4e-08	18.4159	31.1393	1395.52	1604.7	659.68	756.726	92.76	75.7382	5.6932	6.70112
829	Hf1Be1O3	Pm-3m	221	cubic	1.657	9.63065	-2.726	40.6055	5	3.43712	3.43712	3.43712	90	90	90	20	26.0461	10.8	6.4	2.8	1.6	47.1001	65.7507	14.074	4.85546	1.664	0.283027	1.044	0.277027	180.2	40.8725	0.91	0.389358	2.642	0.980539	84.8558	68.7343	7.56e-08	1.33e-07	42.6159	74.2272	1577.72	1942.8	846.08	1014.24	92.76	75.7382	6.8232	9.80633
830	La1Ce1O3	Pm-3m	221	cubic	0.408	4.12699	-2.7	131.58	5	5.08624	5.08624	5.08624	90	90	90	27.8	24.252	11	6.13188	4.4	2.93939	65.4039	60.5092	19.032	2.11716	1.882	0.443369	1.2064	0.0718042	207.2	70.1267	1.14	0.613188	2.508	1.14148	106.2	42.9449	2.71e-07	3.34e-07	4.81595	5.89975	1529.32	1762.9	485.08	528.464	92.76	75.7382	2.4732	2.76602
831	Co1Ge1O3	Pm-3m	221	cubic	0.964	5.75909	-1.14	51.7765	5	3.72716	3.72716	3.72716	90	90	90	16.6	10.6508	14.2	2.71293	2.8	0.979796	35.9143	24.7728	14.476	4.16177	1.734	0.264394	1.06367	0.240459	183.8	41.5423	0.86	0.269518	2.842	0.73355	121.148	29.8823	0.000100012	0.000199994	32.0159	41.1701	1312.72	1497.66	628.76	724.655	92.76	75.7382	9.7332	12.6503
832	Ce1Cr1O3	Pm-3m	221	cubic	1.82	6.58566	-2.993	60.5425	5	3.92663	3.92663	3.92663	90	90	90	21.2	19.4155	11.6	5.42586	3.6	2.33238	48.0221	48.1112	16	4.57073	1.808	0.370643	1.16	0.130231	196.6	58.6706	1.012	0.486555	2.62	1.01871	109.99	37.9537	1.73e-07	2.88e-07	21.0159	36.7387	1369.52	1581.92	682.48	845.357	92.76	75.7382	5.3332	7.85408
833	Lu1B1O3	Pm-3m	221	cubic	3.32	9.59202	-2.525	40.4706	5	3.43331	3.43331	3.43331	90	90	90	20	25.5265	15.6	1.35647	3.2	2.4	46.7552	64.1374	14.85	5.23253	1.744	0.292411	1.0382	0.329729	181	44.109	0.9	0.427083	2.726	0.907736	96.5454	54.4473	200000000000	400000000000	8.61595	11.08	1629.12	1892.08	887.68	1028.84	92.76	75.7382	14.5332	19.6371
834	La1Cr1O3	Pm-3m	221	cubic	1.769	6.5482	-3.083	60.5819	5	3.92748	3.92748	3.92748	90	90	90	21	19.0368	11.4	5.71314	3.6	2.33238	47.78	47.648	16.34	4.95411	1.81	0.373952	1.1784	0.123977	198.6	61.8372	1.032	0.521014	2.616	1.02461	106.516	42.6285	1.48e-07	2.38e-07	21.4159	36.6382	1391.52	1613.69	707.48	858.14	92.76	75.7382	5.4732	7.86204
835	La1Fe1O3	Pm-3m	221	cubic	0.269	6.55843	-2.657	61.4619	5	3.94641	3.94641	3.94641	90	90	90	21.4	19.1165	11.8	5.38145	3.6	2.33238	48.5497	47.7409	16.312	5.00564	1.806	0.371354	1.1609	0.157922	198.4	61.6882	1.02	0.515364	2.65	0.994706	96.5694	55.2509	1.43e-07	2.39e-07	18.6159	31.1006	1429.52	1651.59	633.68	735.422	92.76	75.7382	4.1332	5.35931
836	Na1Nb1O3	Pm-3m	221	cubic	1.748	4.31922	-2.669	63.0097	5	3.97926	3.97926	3.97926	90	90	90	15.2	12.9522	10.8	6.49307	2.8	1.16619	32.7789	30.1854	17.338	4.09524	1.802	0.346549	1.152	0.170458	191.2	50.4951	1.016	0.460678	2.568	1.08818	112.835	36.2489	4.02e-08	5.9e-08	38.8159	54.7405	1288.72	1909.29	657.054	1053.61	607.36	984.642	6.0132	10.4341
837	Nb1B1O3	Pm-3m	221	cubic	1.744	4.03104	-1.19	62.4974	5	3.96845	3.96845	3.96845	90	90	90	14	13.5499	13.2	4.26146	2.6	1.2	30.3431	31.3461	13.46	5.19253	1.732	0.272353	1.002	0.341549	179.6	41.5192	0.864	0.356516	2.79	0.808703	107.66	45.1871	200000000000	400000000000	16.2159	21.588	1897.52	2228.53	1052.68	1228.71	92.76	75.7382	15.4932	20.0908
838	La1Al1O3	Pm-3m	221	cubic	3.601	6.56106	-3.554	54.1322	5	3.78285	3.78285	3.78285	90	90	90	18.8	19.1979	12.8	5.03587	3.4	2.33238	42.777	48.252	16.894	3.95941	1.766	0.354378	1.1254	0.227764	194.6	59.3013	1.02	0.515364	2.606	1.03409	102.008	47.7393	1.28e-07	2.44e-07	49.6159	92.8281	1361.12	1585.34	458.174	500.801	92.76	75.7382	3.5132	4.27469
839	Ho1B1O3	Pm-3m	221	cubic	3.049	9.1028	-2.528	40.8147	5	3.44301	3.44301	3.44301	90	90	90	19.2	23.9282	14.8	1.46969	3.2	2.4	44.7479	60.1248	15.042	5.35275	1.756	0.313024	1.0462	0.329214	185	51.6294	0.91	0.446766	2.718	0.920617	89.9834	63.0334	200000000000	400000000000	8.61595	11.08	1492.72	1759.62	849.48	992.521	92.76	75.7382	13.5332	19.3567
840	Ac1Al1O3	Pm-3m	221	cubic	4.307	8.73052	-3.532	57.4363	5	3.8583	3.8583	3.8583	90	90	90	25.2	31.9587	12.8	5.03587	3.6	2.72764	60.3959	83.4105	16.926	4.0041	1.774	0.36941	1.143	0.234	191.6	54.1502	1.034	0.540503	2.604	1.03701	99.692	50.6255	5.4e-09	1.08e-08	49.4159	92.9078	1327.12	1534.91	484.174	540.108	92.76	75.7382	5.0732	6.03243
841	Nd1Gd1O3	Pm-3m	221	cubic	0.78	6.5731	-2.551	88.2905	5	4.45285	4.45285	4.45285	90	90	90	29.6	26.4847	12.8	4.11825	4.4	2.93939	69.898	66.1401	18.514	1.4301	1.858	0.414266	1.2263	0.0759194	204.8	67.3065	1.124	0.59308	2.534	1.10984	84.5856	69.0639	3.91e-07	5.23e-07	5.61595	7.10363	1433.32	1645.66	609.28	685.176	92.76	75.7382	3.5532	4.18167
842	Ce1Er1O3	Pm-3m	221	cubic	1.898	7.6499	-3.25	77.1397	5	4.25689	4.25689	4.25689	90	90	90	30	27.1293	13.2	4.66476	4.4	2.93939	71.0746	67.997	18.246	1.29413	1.854	0.411125	1.178	0.101666	203.4	65.4633	1.106	0.57116	2.536	1.10782	97.1296	57.2463	3.2e-07	3.94e-07	5.21595	6.4803	1408.92	1622.57	606.88	714.887	92.76	75.7382	5.2132	7.62261
843	Ce1Fe1O3	Pm-3m	221	cubic	0.333	6.55671	-2.57	61.7846	5	3.9533	3.9533	3.9533	90	90	90	21.6	19.4895	12	5.05964	3.6	2.33238	48.7918	48.1993	15.972	4.62448	1.804	0.368	1.1425	0.160888	196.4	58.5068	1	0.48	2.654	0.988486	100.043	52.3934	1.68e-07	2.89e-07	18.2159	31.183	1407.52	1621.08	608.68	717.899	92.76	75.7382	3.9932	5.31243
844	Dy1Cr1O3	Pm-3m	221	cubic	1.758	7.81856	-2.888	55.7497	5	3.82015	3.82015	3.82015	90	90	90	22.8	22.4713	13.2	3.91918	3.6	2.33238	52.4989	56.74	15.664	4.26515	1.786	0.335237	1.1702	0.125476	195.2	56.5169	1.004	0.473016	2.64	0.989626	97.4456	57.0596	2.11e-07	3.61e-07	21.0159	36.7387	1210.92	1372.99	804.88	932.164	92.76	75.7382	6.4532	8.1901
846	Lu1Bi1O3	Pm-3m	221	cubic	0.411	9.68455	-2.2	74.0625	5	4.19952	4.19952	4.19952	90	90	90	35.6	34.0153	16	0.632456	4	2.52982	86.3891	86.8778	18.234	1.54658	1.774	0.315696	1.1632	0.119042	198.6	59.7649	1.032	0.486062	2.722	0.910789	109.332	42.8917	3.76e-07	5.14e-07	4.81595	6.38804	1156.52	1429.47	526.76	724.379	92.76	75.7382	6.7132	8.69048
847	Gd1Cr1O3	Pm-3m	221	cubic	1.758	7.59718	-2.923	56.2267	5	3.83102	3.83102	3.83102	90	90	90	22.4	21.7035	12.8	4.11825	3.6	2.33238	51.4489	54.7068	15.842	4.41694	1.792	0.344697	1.159	0.130859	194.8	55.9121	1.008	0.479767	2.638	0.9925	97.4456	57.0596	2.87e-07	5.14e-07	21.0159	36.7387	1347.52	1550.74	785.88	914.942	92.76	75.7382	6.2332	8.07631
848	Dy1Er1O3	Pm-3m	221	cubic	1.129	8.16781	-2.844	76.7991	5	4.25062	4.25062	4.25062	90	90	90	31.6	28.9109	14.8	1.6	4.4	2.93939	75.5514	72.9516	17.91	0.695701	1.832	0.382173	1.1882	0.0935573	202	63.6899	1.098	0.561013	2.556	1.08269	84.5856	69.0639	3.57e-07	4.38e-07	5.21595	6.4803	1250.32	1424.04	729.28	826.966	92.76	75.7382	6.3332	7.98525
850	Nd1Cr1O3	Pm-3m	221	cubic	1.632	6.99825	-2.977	57.9522	5	3.86981	3.86981	3.86981	90	90	90	21.6	20.1752	12	4.89898	3.6	2.33238	48.8473	49.6931	15.98	4.55034	1.802	0.360799	1.1993	0.129807	198	60.8769	1.02	0.50024	2.624	1.01283	97.4456	57.0596	1.54e-07	2.49e-07	22.2159	36.4891	1317.52	1509.26	728.28	870.823	92.76	75.7382	5.6532	7.88688
851	Nb1Ag1O3	Pm-3m	221	cubic	1.437	6.46759	-1.992	63.8718	5	3.99733	3.99733	3.99733	90	90	90	22.4	17.7381	12.8	4.35431	3.2	1.46969	49.7546	41.6113	14.636	3.3409	1.77	0.306985	1.13733	0.172284	191.8	51.2031	0.968	0.406664	2.768	0.830022	127.387	20.389	3.37e-08	5.95e-08	96.8159	167.898	1544.52	1959.4	829.866	1063.31	92.76	75.7382	7.7532	10.4453
852	Er1Al1O3	Pm-3m	221	cubic	3.197	8.15315	-3.435	49.3364	5	3.66766	3.66766	3.66766	90	90	90	21	23.5797	15	1.26491	3.4	2.33238	48.4477	59.5577	16.108	3.08357	1.738	0.302549	1.097	0.229033	190.8	52.8068	0.986	0.455702	2.634	0.994054	92.938	60.2983	1.77e-07	3.41e-07	50.0159	92.6736	1240.72	1413.41	579.974	699.39	92.76	75.7382	6.2532	7.93896
853	Ac1Cr1O3	Pm-3m	221	cubic	1.666	8.76216	-3.119	61.9695	5	3.95724	3.95724	3.95724	90	90	90	27.4	31.4172	11.4	5.71314	3.8	2.71293	65.3989	81.9945	16.372	4.99344	1.818	0.387319	1.196	0.128	195.6	57.1265	1.046	0.545586	2.614	1.02757	104.2	46.0648	2.54e-08	5.08e-08	21.2159	36.6863	1357.52	1564.84	733.48	874.274	92.76	75.7382	7.0332	8.59149
854	Ce1Nd1O3	Pm-3m	221	cubic	0.73	5.86235	-2.517	94.1415	5	4.54912	4.54912	4.54912	90	90	90	28.4	24.9928	11.6	5.42586	4.4	2.93939	66.4712	61.8289	18.672	1.60718	1.874	0.433663	1.2273	0.0739267	206.6	69.3559	1.128	0.597809	2.516	1.13168	97.1296	57.2463	2.77e-07	3.4e-07	5.61595	7.10363	1455.32	1673.94	505.88	557.184	92.76	75.7382	2.6532	3.02028
855	Gd1Al1O3	Pm-3m	221	cubic	3.036	7.62553	-3.479	50.5705	5	3.69799	3.69799	3.69799	90	90	90	20.2	21.9854	14.2	2.4	3.4	2.33238	46.4459	55.5651	16.396	3.34588	1.748	0.320899	1.106	0.227099	190.8	52.8068	0.996	0.473016	2.628	1.0025	92.938	60.2983	2.67e-07	5.21e-07	49.2159	92.9892	1317.12	1520.34	536.574	624.987	92.76	75.7382	4.2732	4.96662
856	Ba1Hf1O3	Pm-3m	221	cubic	3.687	8.30457	-3.625	72.7466	5	4.1745	4.1745	4.1745	90	90	90	30.4	27.897	10.8	6.4	3.6	1.95959	72.763	70.7291	20.736	8.8433	1.894	0.47965	1.224	0.207133	201.2	64.6696	1.124	0.607473	2.506	1.15197	87.6466	65.4364	1.36e-07	1.67e-07	8.21595	10.1537	1457.92	1884.92	734.08	958.611	92.76	75.7382	6.8332	9.80749
857	Nd1Lu1O3	Pm-3m	221	cubic	2.148	8.36901	-3.315	72.8595	5	4.17666	4.17666	4.17666	90	90	90	31	28.3831	14.2	4.11825	4.4	2.93939	73.4414	71.0196	18.09	1.26054	1.838	0.392347	1.2115	0.105444	201.6	64.0019	1.108	0.574888	2.546	1.09569	91.1476	61.9028	2.45e-07	3e-07	6.61595	8.07649	1463.72	1684.92	677.28	787.82	92.76	75.7382	5.9532	8.45405
858	La1Dy1O3	Pm-3m	221	cubic	1.85	7.29128	-3.253	79.5743	5	4.30121	4.30121	4.30121	90	90	90	29.4	26.3636	12.6	5.04381	4.4	2.93939	69.8807	66.4114	18.696	1.95443	1.86	0.418139	1.2166	0.0547123	205.8	68.5519	1.132	0.604199	2.528	1.11761	93.6556	59.7034	3.08e-07	3.9e-07	4.81595	5.89975	1370.72	1594.09	607.48	694.19	92.76	75.7382	3.5932	4.41004
859	Ho1Ga1O3	Pm-3m	221	cubic	3.186	8.59202	-2.673	54.6267	5	3.79433	3.79433	3.79433	90	90	90	24.4	23.0877	14.8	1.46969	3.6	2.33238	56.5303	58.0567	16.524	2.42172	1.746	0.308389	1.1162	0.197266	193	55.0781	0.988	0.461537	2.672	0.958319	92.8836	60.3445	1.91e-07	3.16e-07	9.01595	11.7522	1148.12	1305.92	440.262	653.967	92.76	75.7382	4.6512	6.51502
860	Ca1Hf1O3	Pm-3m	221	cubic	3.911	6.54849	-3.51	67.5948	5	4.07353	4.07353	4.07353	90	90	90	23.2	24.8387	10.8	6.4	3.2	1.6	53.3132	63.2793	18.344	4.21119	1.82	0.368293	1.154	0.158947	193	52.7409	1.06	0.515364	2.53	1.11882	85.3298	68.1532	7.48e-08	1.33e-07	44.6159	78.1999	1380.72	1863.06	757.08	966.066	92.76	75.7382	6.9412	9.82271
861	Nd1Dy1O3	Pm-3m	221	cubic	0.497	6.69468	-2.487	87.9893	5	4.44778	4.44778	4.44778	90	90	90	30	27.0111	13.2	3.91918	4.4	2.93939	70.948	67.5453	18.336	1.29557	1.852	0.407402	1.2375	0.0536321	205.2	67.7507	1.12	0.588422	2.536	1.10746	84.5856	69.0639	3.14e-07	3.95e-07	5.61595	7.10363	1296.72	1487.26	628.28	712.733	92.76	75.7382	3.7732	4.52952
862	Lu1Ga1O3	Pm-3m	221	cubic	3.12	9.03311	-2.59	53.8043	5	3.77519	3.77519	3.77519	90	90	90	25.2	24.5715	15.6	1.35647	3.6	2.33238	58.5376	61.8214	16.332	2.27183	1.734	0.287026	1.1082	0.20093	189	48.7606	0.978	0.44427	2.68	0.94634	99.4456	50.9382	1.44e-07	2.25e-07	9.01595	11.7522	1284.52	1511	478.462	729.624	92.76	75.7382	5.6512	8.43464
863	Gd1Er1O3	Pm-3m	221	cubic	1.779	8.23919	-3.062	75.0757	5	4.21858	4.21858	4.21858	90	90	90	31.2	28.4422	14.4	2.33238	4.4	2.93939	74.5014	71.7199	18.088	1.00117	1.838	0.38979	1.177	0.102645	201.6	63.1968	1.102	0.566053	2.554	1.08517	84.5856	69.0639	4.34e-07	5.5e-07	5.21595	6.4803	1386.92	1592.74	710.28	805.723	92.76	75.7382	6.1132	7.86514
864	Gd1Ho1O3	Pm-3m	221	cubic	1.071	7.66728	-2.759	80.1713	5	4.31194	4.31194	4.31194	90	90	90	31	28.1851	14.2	2.4	4.4	2.93939	74.0357	71.1211	18.144	1.02788	1.84	0.392122	1.1792	0.0995417	202.4	64.1891	1.106	0.57081	2.552	1.08759	84.5856	69.0639	4.25e-07	5.43e-07	5.41595	6.78734	1357.32	1560.92	696.68	787.55	92.76	75.7382	5.5332	6.87119
865	La1Nd1O3	Pm-3m	221	cubic	0.693	5.92442	-2.638	92.8159	5	4.52766	4.52766	4.52766	90	90	90	28.2	24.758	11.4	5.71314	4.4	2.93939	66.2291	61.5418	19.012	2.10182	1.876	0.436193	1.2457	0.0374	208.6	71.7763	1.148	0.62246	2.512	1.13663	93.6556	59.7034	2.52e-07	3.08e-07	6.01595	7.44371	1477.32	1702.89	530.88	584.003	92.76	75.7382	2.7932	3.1619
867	Ac1In1O3	Pm-3m	221	cubic	2.569	8.8242	-2.57	73.3556	5	4.18612	4.18612	4.18612	90	90	90	32.4	32.4506	12.8	5.03587	4	2.75681	77.9632	83.772	18.078	2.32028	1.792	0.374347	1.196	0.128	195.2	56.7852	1.07	0.558713	2.638	1.00619	97.1196	53.735	1.6e-08	3.2e-08	18.8159	31.9306	1237.72	1458.08	383.43	491.717	92.76	75.7382	3.5852	5.33867
868	Er1In1O3	Pm-3m	221	cubic	1.406	8.04975	-2.095	68.0894	5	4.08344	4.08344	4.08344	90	90	90	28.2	25.459	15	1.26491	3.8	2.4	66.015	63.4614	17.26	0.862554	1.756	0.310651	1.15	0.137695	194.4	55.5575	1.022	0.480766	2.668	0.9608	90.3656	62.6549	1.88e-07	3.37e-07	19.4159	31.8249	1151.32	1323.75	479.23	677.14	92.76	75.7382	4.7652	7.65833
869	Mn1Ge1O3	Pm-3m	221	cubic	1.274	5.72749	-1.667	50.9038	5	3.7061	3.7061	3.7061	90	90	90	16.2	10.284	13.8	3.48712	2.8	0.979796	35.1152	24.072	14.612	3.90782	1.744	0.274998	1.03967	0.272581	184.8	42.9204	0.882	0.297752	2.776	0.826138	108.373	54.8547	0.000100288	0.000199857	13.5759	23.4065	1139.52	1307.37	578.96	649.29	92.76	75.7382	9.1332	12.398
870	Ac1Ga1O3	Pm-3m	221	cubic	3.356	9.29307	-2.904	61.5968	5	3.94929	3.94929	3.94929	90	90	90	28.8	31.3904	12.8	5.03587	3.8	2.71293	68.9442	81.7211	17.286	3.40066	1.78	0.370675	1.16	0.2	193	55.0781	1.032	0.539756	2.644	1.00113	99.6376	50.6878	2.8e-08	5.6e-08	8.21595	11.3797	1264.12	1478.94	358.062	491.945	92.76	75.7382	4.0512	5.39138
871	Dy1Ga1O3	Pm-3m	221	cubic	3.133	8.46708	-2.692	54.9562	5	3.80194	3.80194	3.80194	90	90	90	24.2	22.7192	14.6	1.74356	3.6	2.33238	56.0442	57.1502	16.578	2.47299	1.748	0.311987	1.1342	0.193656	192.6	54.4265	0.99	0.465016	2.67	0.961332	92.8836	60.3445	2.13e-07	3.61e-07	8.01595	11.3201	1117.52	1263.43	429.462	632.61	92.76	75.7382	3.4712	4.34419
872	Ac1Nd1O3	Pm-3m	221	cubic	1.828	7.62551	-3.029	91.2942	5	4.50278	4.50278	4.50278	90	90	90	34.6	33.8443	11.4	5.71314	4.6	3.2	83.848	87.1209	19.044	2.15359	1.884	0.446524	1.2633	0.0066	205.6	68.2015	1.162	0.640637	2.51	1.13912	91.3396	61.7228	1.29e-07	2.57e-07	5.81595	7.26465	1443.32	1658.43	556.88	614.975	92.76	75.7382	4.3532	5.5101
873	La1Er1O3	Pm-3m	221	cubic	2.001	7.62233	-3.342	77.155	5	4.25717	4.25717	4.25717	90	90	90	29.8	26.9251	13	5.05964	4.4	2.93939	70.8325	67.7525	18.586	1.94913	1.856	0.413889	1.1964	0.0899102	205.4	68.1164	1.126	0.597649	2.532	1.11295	93.6556	59.7034	2.95e-07	3.7e-07	5.61595	6.8747	1430.92	1653.04	631.88	732.544	92.76	75.7382	5.3532	7.63301
874	Nd1B1O3	Pm-3m	221	cubic	2.497	7.56971	-2.431	44.5426	5	3.5448	3.5448	3.5448	90	90	90	17.8	21.132	13.4	3.87814	3.2	2.4	40.6102	51.8548	15.412	5.6512	1.774	0.344767	1.0933	0.34171	187.4	56.2053	0.928	0.482261	2.7	0.949947	89.9834	63.0334	200000000000	400000000000	8.81595	11.2196	1568.72	1829.6	762.08	927.921	92.76	75.7382	11.5532	19.4071
875	La1Nd1O3	Pm-3m	221	cubic	1.024	6.11801	-2.871	89.879	5	4.4794	4.4794	4.4794	90	90	90	28.2	24.758	11.4	5.71314	4.4	2.93939	66.2291	61.5418	19.012	2.10182	1.876	0.436193	1.2457	0.0374	208.6	71.7763	1.148	0.62246	2.512	1.13663	93.6556	59.7034	2.52e-07	3.08e-07	6.01595	7.44371	1477.32	1702.89	530.88	584.003	92.76	75.7382	2.7932	3.1619
877	Ce1Gd1O3	Pm-3m	221	cubic	0.432	6.14001	-2.371	93.4023	5	4.53718	4.53718	4.53718	90	90	90	29.2	26.0338	12.4	4.8	4.4	2.93939	69.0728	65.2269	18.534	1.45939	1.864	0.422071	1.187	0.0894204	203.4	65.4633	1.116	0.583013	2.53	1.11488	97.1296	57.2463	4.1e-07	5.34e-07	4.41595	5.37586	1485.32	1709.02	563.48	644.098	92.76	75.7382	3.2332	3.95297
878	Ho1Er1O3	Pm-3m	221	cubic	1.411	8.34898	-2.897	75.616	5	4.22868	4.22868	4.22868	90	90	90	31.8	29.1506	15	1.26491	4.4	2.93939	76.0375	73.535	17.856	0.613892	1.83	0.379684	1.1702	0.110037	202.4	64.1891	1.096	0.558519	2.558	1.08023	84.5856	69.0639	3.35e-07	4.1e-07	6.21595	7.58699	1280.92	1459.08	740.08	839.569	92.76	75.7382	7.5132	8.97683
879	Nd1Ho1O3	Pm-3m	221	cubic	0.331	6.73927	-2.456	88.0059	5	4.44806	4.44806	4.44806	90	90	90	30.2	27.2793	13.4	3.87814	4.4	2.93939	71.4341	68.2078	18.282	1.27176	1.85	0.405167	1.2195	0.0894785	205.6	68.2015	1.118	0.586119	2.538	1.10509	84.5856	69.0639	2.91e-07	3.61e-07	6.61595	8.07649	1327.32	1519.91	639.08	728.815	92.76	75.7382	4.9532	6.58615
881	Nd1Ho1O3	Pm-3m	221	cubic	1.702	7.66259	-3.137	77.4014	5	4.2617	4.2617	4.2617	90	90	90	30.2	27.2793	13.4	3.87814	4.4	2.93939	71.4341	68.2078	18.282	1.27176	1.85	0.405167	1.2195	0.0894785	205.6	68.2015	1.118	0.586119	2.538	1.10509	84.5856	69.0639	2.91e-07	3.61e-07	6.61595	8.07649	1327.32	1519.91	639.08	728.815	92.76	75.7382	4.9532	6.58615
882	Gd1B1O3	Pm-3m	221	cubic	2.803	8.5376	-2.513	42.0229	5	3.47666	3.47666	3.47666	90	90	90	18.6	22.7297	14.2	2.4	3.2	2.4	43.2118	57.0545	15.274	5.5302	1.764	0.327023	1.053	0.329387	184.2	50.1135	0.916	0.458589	2.714	0.927094	89.9834	63.0334	200000000000	400000000000	7.61595	10.5829	1598.72	1859.91	819.68	967.436	92.76	75.7382	12.1332	19.3084
883	Ce1B1O3	Pm-3m	221	cubic	1.934	7.11693	-2.358	46.4137	5	3.59376	3.59376	3.59376	90	90	90	17.4	20.3332	13	4.64758	3.2	2.4	39.785	50.2057	15.432	5.66964	1.78	0.355528	1.054	0.32946	186	53.5313	0.92	0.466476	2.696	0.956527	102.527	48.4264	200000000000	400000000000	7.61595	10.5829	1620.72	1883.05	716.28	905.776	92.76	75.7382	11.2332	19.4909
884	La1B1O3	Pm-3m	221	cubic	2.138	7.08567	-2.441	46.3348	5	3.59172	3.59172	3.59172	90	90	90	17.2	19.9339	12.8	5.03587	3.2	2.4	39.5429	49.7219	15.772	6.0152	1.782	0.359132	1.0724	0.332949	188	57.355	0.94	0.505964	2.692	0.963128	99.0534	51.6717	200000000000	400000000000	8.01595	10.7399	1642.72	1906.92	741.28	916.796	92.76	75.7382	11.3732	19.4517
885	Nd1Gd1O3	Pm-3m	221	cubic	1.412	7.12158	-2.98	81.4907	5	4.33547	4.33547	4.33547	90	90	90	29.6	26.4847	12.8	4.11825	4.4	2.93939	69.898	66.1401	18.514	1.4301	1.858	0.414266	1.2263	0.0759194	204.8	67.3065	1.124	0.59308	2.534	1.10984	84.5856	69.0639	3.91e-07	5.23e-07	5.61595	7.10363	1433.32	1645.66	609.28	685.176	92.76	75.7382	3.5532	4.18167
887	Ga1Bi1O3	Pm-3m	221	cubic	1.464	9.36474	-1.576	57.9301	5	3.86932	3.86932	3.86932	90	90	90	27.6	29.0971	15.2	1.16619	3.2	1.6	65.3403	74.7733	17.038	3.03307	1.7	0.229347	1.115	0.197737	192.4	54.1021	0.93	0.365294	2.83	0.75004	111.068	39.8255	2.88e-07	5.09e-07	7.41595	11.2252	916.92	1032.55	202.342	196.175	92.76	75.7382	3.4312	4.27411
888	Nd1Er1O3	Pm-3m	221	cubic	1.892	7.8326	-3.182	76.2151	5	4.23982	4.23982	4.23982	90	90	90	30.4	27.5507	13.6	3.87814	4.4	2.93939	71.8998	68.8496	18.226	1.25643	1.848	0.402959	1.2173	0.0938678	204.8	67.3065	1.114	0.58157	2.54	1.10272	84.5856	69.0639	3.01e-07	3.74e-07	6.41595	7.85086	1356.92	1553.14	652.68	749.462	92.76	75.7382	5.5332	7.66141
889	Gd1Fe1O3	Pm-3m	221	cubic	0.236	7.59853	-2.488	57.0578	5	3.8498	3.8498	3.8498	90	90	90	22.8	21.7476	13.2	3.48712	3.6	2.33238	52.2186	54.7362	15.814	4.47155	1.788	0.341667	1.1415	0.161289	194.6	55.7337	0.996	0.473016	2.672	0.96082	87.4994	65.657	2.82e-07	5.15e-07	18.2159	31.183	1385.52	1591.2	712.08	808.167	92.76	75.7382	4.8932	5.84587
890	La1Lu1O3	Pm-3m	221	cubic	2.421	8.15148	-3.465	73.7168	5	4.19297	4.19297	4.19297	90	90	90	30.4	27.7892	13.6	5.31413	4.4	2.93939	72.3741	69.9801	18.45	1.9767	1.846	0.403762	1.1906	0.10074	202.2	64.8827	1.12	0.59127	2.538	1.10603	100.218	50.0759	2.39e-07	2.93e-07	5.81595	7.15368	1537.72	1772.97	656.48	772.406	92.76	75.7382	5.7732	8.43728
891	Ce1Al1O3	Pm-3m	221	cubic	3.141	6.59527	-3.47	54.1562	5	3.78341	3.78341	3.78341	90	90	90	19	19.5959	13	4.64758	3.4	2.33238	43.0191	48.7344	16.554	3.52166	1.764	0.350634	1.107	0.226971	192.6	55.8484	1	0.48	2.61	1.02828	105.482	43.9734	1.53e-07	2.93e-07	49.2159	92.9892	1339.12	1552.56	433.174	465.36	92.76	75.7382	3.3732	4.19513
892	K1Nb1O3	Pm-3m	221	cubic	1.735	4.56908	-2.686	65.4183	5	4.02933	4.02933	4.02933	90	90	90	16.8	12.8281	10.8	6.49307	3	1.26491	36.0006	29.8262	21.77	12.3468	1.898	0.496806	1.224	0.225708	195.8	56.3503	1.096	0.575555	2.546	1.12167	111.939	37.7453	4.54e-08	6.07e-08	30.8159	40.4175	1263.92	1911.66	650.186	1055.56	537.36	844.944	5.9592	10.4523
893	Cd1Ge1O3	Pm-3m	221	cubic	0.271	7.32792	-1.405	52.81	5	3.75179	3.75179	3.75179	90	90	90	20.8	16.473	14.8	1.6	3	1.26491	46.6098	39.5433	15.742	1.99163	1.77	0.306985	1.128	0.190725	185.6	44.0572	0.904	0.32946	2.804	0.785483	108.373	54.8547	0.000100014	0.000199993	31.4159	40.1851	880.72	1165.7	394.004	458.999	92.76	75.7382	7.7532	12.2517
894	Dy1Ho1O3	Pm-3m	221	cubic	1.383	8.07933	-2.875	77.1616	5	4.2573	4.2573	4.2573	90	90	90	31.4	28.6608	14.6	1.74356	4.4	2.93939	75.0857	72.3697	17.966	0.74709	1.834	0.384583	1.1904	0.0898679	202.8	64.6696	1.102	0.565841	2.554	1.08513	84.5856	69.0639	3.48e-07	4.28e-07	5.41595	6.78734	1220.72	1385.44	715.68	809.59	92.76	75.7382	5.7532	7.02654
895	La1In1O3	Pm-3m	221	cubic	2.2	7.02098	-2.455	71.3605	5	4.14781	4.14781	4.14781	90	90	90	26	22.1901	12.8	5.03587	3.8	2.4	60.3443	54.8428	18.046	2.25867	1.784	0.359922	1.1784	0.123977	198.2	61.5415	1.056	0.535373	2.64	1.00312	99.4356	51.1416	1.39e-07	2.4e-07	19.0159	31.8903	1271.72	1513.08	357.43	442.304	92.76	75.7382	2.0252	2.39618
896	Lu1Al1O3	Pm-3m	221	cubic	3.181	8.54542	-3.388	48.5694	5	3.64856	3.64856	3.64856	90	90	90	21.6	24.7758	15.6	1.35647	3.4	2.33238	49.9893	62.6334	15.972	2.99043	1.728	0.284422	1.0912	0.231015	187.6	47.5924	0.98	0.445421	2.64	0.985677	99.5	50.8763	1.21e-07	2.3e-07	50.2159	92.5989	1347.52	1565.01	604.574	742.759	92.76	75.7382	6.6732	8.67156
897	Er1B1O3	Pm-3m	221	cubic	3.096	9.27377	-2.53	40.4792	5	3.43356	3.43356	3.43356	90	90	90	19.4	24.3278	15	1.26491	3.2	2.4	45.2136	61.0558	14.986	5.3151	1.754	0.309555	1.044	0.329278	184.2	50.1135	0.906	0.43889	2.72	0.917388	89.9834	63.0334	200000000000	400000000000	8.41595	10.9532	1522.32	1785.67	863.08	1004.94	92.76	75.7382	14.1132	19.4948
898	Ac1Er1O3	Pm-3m	221	cubic	2.879	9.28477	-3.473	79.0957	5	4.29257	4.29257	4.29257	90	90	90	36.2	35.1704	13	5.05964	4.6	3.2	88.4514	90.724	18.618	2.01163	1.864	0.42514	1.214	0.092	202.4	64.1891	1.14	0.617058	2.53	1.11553	91.3396	61.7228	1.72e-07	3.44e-07	5.41595	6.66843	1396.92	1606.22	657.88	753.991	92.76	75.7382	6.9132	8.40472
899	Ce1Lu1O3	Pm-3m	221	cubic	2.157	8.16715	-3.375	73.8214	5	4.19496	4.19496	4.19496	90	90	90	30.6	27.9829	13.8	4.91528	4.4	2.93939	72.6162	70.2115	18.11	1.30022	1.844	0.400879	1.1722	0.110396	200.2	61.9884	1.1	0.564269	2.542	1.10084	103.692	46.6331	2.64e-07	3.27e-07	5.41595	6.78734	1515.72	1745.95	631.48	756.495	92.76	75.7382	5.6332	8.43485
900	Gd1Lu1O3	Pm-3m	221	cubic	0.417	7.91205	-2.635	79.7975	5	4.30523	4.30523	4.30523	90	90	90	31.8	29.2329	15	2.52982	4.4	2.93939	76.043	73.7513	17.952	0.98749	1.828	0.378545	1.1712	0.111246	198.4	59.4932	1.096	0.559056	2.56	1.07794	91.1476	61.9028	3.78e-07	5.17e-07	5.41595	6.78734	1493.72	1719.63	734.88	839.835	92.76	75.7382	6.5332	8.61086
901	Ho1Lu1O3	Pm-3m	221	cubic	2.083	9.03676	-3.121	71.2773	5	4.1462	4.1462	4.1462	90	90	90	32.4	29.9105	15.6	1.35647	4.4	2.93939	77.5791	75.4862	17.72	0.535313	1.82	0.367913	1.1644	0.117767	199.2	60.5884	1.09	0.551362	2.564	1.07295	91.1476	61.9028	2.79e-07	3.49e-07	6.41595	7.82535	1387.72	1603.7	764.68	871.517	92.76	75.7382	7.9332	9.57569
902	Nd1Ga1O3	Pm-3m	221	cubic	2.879	7.61615	-2.774	57.1155	5	3.8511	3.8511	3.8511	90	90	90	23	20.5329	13.4	3.87814	3.6	2.33238	52.3926	50.4183	16.894	2.83763	1.764	0.341092	1.1633	0.201751	195.4	59.0647	1.006	0.493137	2.654	0.98569	92.8836	60.3445	1.57e-07	2.49e-07	9.21595	11.8772	1224.12	1417.37	352.862	481.75	92.76	75.7382	2.6712	3.03741
903	Ce1Dy1O3	Pm-3m	221	cubic	1.772	7.32362	-3.16	79.4973	5	4.29983	4.29983	4.29983	90	90	90	29.6	26.5752	12.8	4.66476	4.4	2.93939	70.1228	66.6643	18.356	1.33051	1.858	0.415423	1.1982	0.0773884	203.8	65.9284	1.112	0.578218	2.532	1.11252	97.1296	57.2463	3.33e-07	4.12e-07	4.41595	5.37586	1348.72	1561.63	582.48	674.629	92.76	75.7382	3.4532	4.33555
904	Ce1Gd1O3	Pm-3m	221	cubic	1.632	6.96931	-3.055	82.2881	5	4.34956	4.34956	4.34956	90	90	90	29.2	26.0338	12.4	4.8	4.4	2.93939	69.0728	65.2269	18.534	1.45939	1.864	0.422071	1.187	0.0894204	203.4	65.4633	1.116	0.583013	2.53	1.11488	97.1296	57.2463	4.1e-07	5.34e-07	4.41595	5.37586	1485.32	1709.02	563.48	644.098	92.76	75.7382	3.2332	3.95297
905	Eu1Hf1O3	Pm-3m	221	cubic	3.839	9.34192	-3.746	67.2704	5	4.067	4.067	4.067	90	90	90	31.8	29.2875	12.2	4.91528	4	2.52982	75.6904	73.586	18.898	5.25987	1.828	0.379125	1.1657	0.159637	197.2	58.5812	1.078	0.539793	2.566	1.07122	101.528	54.834	2.48e-07	3.52e-07	7.41595	9.48705	1389.32	1864.87	753.88	964.901	92.76	75.7382	7.0732	9.84771
906	Al1Bi1O3	Pm-3m	221	cubic	1.685	8.84334	-2.266	53.32	5	3.76383	3.76383	3.76383	90	90	90	24	29.5635	15.2	1.16619	3	1.54919	56.792	76.213	16.678	3.67278	1.694	0.225175	1.098	0.228749	191	53.1413	0.932	0.366955	2.79	0.806573	111.123	39.7305	2.65e-07	5.17e-07	48.6159	93.2432	979.92	1130.75	328.454	357.026	92.76	75.7382	4.4532	5.18253
907	Ac1Fe1O3	Pm-3m	221	cubic	0.454	8.73664	-2.707	62.8821	5	3.97657	3.97657	3.97657	90	90	90	27.8	31.3841	11.8	5.38145	3.8	2.71293	66.1686	81.883	16.344	5.04475	1.814	0.384895	1.1785	0.163	195.4	56.9547	1.034	0.540503	2.648	0.997826	94.2534	57.5445	2e-08	4e-08	18.4159	31.1393	1395.52	1604.7	659.68	756.726	92.76	75.7382	5.6932	6.70112
908	Ho1Al1O3	Pm-3m	221	cubic	3.167	8.02281	-3.447	49.6559	5	3.67556	3.67556	3.67556	90	90	90	20.8	23.181	14.8	1.46969	3.4	2.33238	47.982	58.6286	16.164	3.128	1.74	0.306203	1.0992	0.228431	191.6	54.1502	0.99	0.462601	2.632	0.996863	92.938	60.2983	1.68e-07	3.23e-07	50.2159	92.5989	1211.12	1374.31	566.374	675.756	92.76	75.7382	5.6732	6.96724
909	B1As1O3	Pm-3m	221	cubic	0.923	5.76365	-0.852	38.5285	5	3.37749	3.37749	3.37749	90	90	90	12.4	10.3653	15.2	1.16619	2.4	0.8	26.7462	24.1714	13.884	5.04492	1.666	0.180178	0.97	0.363868	166	19.6367	0.792	0.218211	2.908	0.653067	105.497	46.3027	200000000000	400000000000	15.4159	20.2027	1071.52	1594.39	720.68	907.525	432.76	636.443	15.6732	20.195
910	Ho1Cr1O3	Pm-3m	221	cubic	1.798	7.92383	-2.868	55.5183	5	3.81486	3.81486	3.81486	90	90	90	23	22.8561	13.4	3.87814	3.6	2.33238	52.9849	57.6828	15.61	4.22395	1.784	0.33212	1.1522	0.135836	195.6	57.1265	1.002	0.469655	2.642	0.98676	97.4456	57.0596	1.88e-07	3.17e-07	22.0159	36.5198	1241.52	1410.16	815.68	942.496	92.76	75.7382	7.6332	9.14406
911	La1Ce1O3	Pm-3m	221	cubic	0.482	5.78786	-2.726	93.8221	5	4.54397	4.54397	4.54397	90	90	90	27.8	24.252	11	6.13188	4.4	2.93939	65.4039	60.5092	19.032	2.11716	1.882	0.443369	1.2064	0.0718042	207.2	70.1267	1.14	0.613188	2.508	1.14148	106.2	42.9449	2.71e-07	3.34e-07	4.81595	5.89975	1529.32	1762.9	485.08	528.464	92.76	75.7382	2.4732	2.76602
913	Hf1Be1O3	Pm-3m	221	cubic	1.19	9.85122	-2.726	39.6964	5	3.41128	3.41128	3.41128	90	90	90	20	26.0461	10.8	6.4	2.8	1.6	47.1001	65.7507	14.074	4.85546	1.664	0.283027	1.044	0.277027	180.2	40.8725	0.91	0.389358	2.642	0.980539	84.8558	68.7343	7.56e-08	1.33e-07	42.6159	74.2272	1577.72	1942.8	846.08	1014.24	92.76	75.7382	6.8232	9.80633
914	Gd1Ga1O3	Pm-3m	221	cubic	2.897	8.21926	-2.726	55.5525	5	3.81564	3.81564	3.81564	90	90	90	23.8	21.9854	14.2	2.4	3.6	2.33238	54.9942	55.1996	16.756	2.66613	1.754	0.322837	1.123	0.195131	192.2	53.7788	0.994	0.472	2.668	0.964353	92.8836	60.3445	2.9e-07	5.13e-07	8.01595	11.3201	1254.12	1463.38	410.462	595.079	92.76	75.7382	3.2512	3.96344
916	Gd1Er1O3	Pm-3m	221	cubic	0.817	7.72987	-2.729	80.0224	5	4.30927	4.30927	4.30927	90	90	90	31.2	28.4422	14.4	2.33238	4.4	2.93939	74.5014	71.7199	18.088	1.00117	1.838	0.38979	1.177	0.102645	201.6	63.1968	1.102	0.566053	2.554	1.08517	84.5856	69.0639	4.34e-07	5.5e-07	5.21595	6.4803	1386.92	1592.74	710.28	805.723	92.76	75.7382	6.1132	7.86514
917	Hf1Mn1O3	Pm-3m	221	cubic	0.576	7.04591	-2.698	66.3249	5	4.04786	4.04786	4.04786	90	90	90	24.2	24.7903	11.8	5.23068	3.2	1.6	56.2852	62.9359	14.574	3.9181	1.768	0.309024	1.05567	0.258254	189.6	48.5658	0.97	0.419047	2.638	0.984935	84.8558	68.7343	3.56e-07	5.58e-07	6.17595	8.93454	1496.12	1900.29	837.88	1008.58	92.76	75.7382	7.8732	10.1459
918	La1Gd1O3	Pm-3m	221	cubic	0.402	6.21077	-2.493	92.0144	5	4.51459	4.51459	4.51459	90	90	90	29	25.8147	12.2	5.15364	4.4	2.93939	68.8307	64.9644	18.874	2.01452	1.866	0.424716	1.2054	0.0735706	205.4	68.1164	1.136	0.608658	2.526	1.11996	93.6556	59.7034	3.85e-07	5.2e-07	4.81595	5.89975	1507.32	1737	588.48	665.273	92.76	75.7382	3.3732	4.04216
919	Li1Nb1O3	Pm-3m	221	cubic	1.662	3.9471	-2.57	62.1985	5	3.96211	3.96211	3.96211	90	90	90	13.6	13.8362	10.8	6.49307	2.6	1.2	29.5691	31.8624	15.186	2.75119	1.712	0.261258	1.1	0.197585	183.6	43.4401	0.956	0.395656	2.578	1.07321	114.188	34.0442	4.94e-08	6.31e-08	27.8159	35.4185	1380.52	1911.74	673.618	1049.62	737.36	1244.26	6.0932	10.4092
920	Gd1Ho1O3	Pm-3m	221	cubic	1.648	8.04759	-3.015	76.3826	5	4.24292	4.24292	4.24292	90	90	90	31	28.1851	14.2	2.4	4.4	2.93939	74.0357	71.1211	18.144	1.02788	1.84	0.392122	1.1792	0.0995417	202.4	64.1891	1.106	0.57081	2.552	1.08759	84.5856	69.0639	4.25e-07	5.43e-07	5.41595	6.78734	1357.32	1560.92	696.68	787.55	92.76	75.7382	5.5332	6.87119
921	Dy1Lu1O3	Pm-3m	221	cubic	2.163	8.97466	-3.148	71.3208	5	4.14705	4.14705	4.14705	90	90	90	32.2	29.681	15.4	1.74356	4.4	2.93939	77.093	74.9279	17.774	0.639049	1.822	0.370535	1.1824	0.10355	198.8	60.038	1.092	0.55391	2.562	1.07544	91.1476	61.9028	3.01e-07	3.85e-07	5.41595	6.78734	1357.12	1573.96	753.88	859.693	92.76	75.7382	6.7532	8.7101
922	Er1Lu1O3	Pm-3m	221	cubic	0.987	9.13354	-3.092	70.9453	5	4.13976	4.13976	4.13976	90	90	90	32.6	30.1437	15.8	0.979796	4.4	2.93939	78.0448	76.0289	17.664	0.429958	1.818	0.365316	1.1622	0.120131	198.4	59.4932	1.086	0.546319	2.566	1.07047	91.1476	61.9028	2.88e-07	3.64e-07	6.21595	7.58699	1417.32	1634.13	778.28	886.932	92.76	75.7382	8.5132	10.1763
923	La1Ho1O3	Pm-3m	221	cubic	1.977	7.47039	-3.298	78.2067	5	4.27643	4.27643	4.27643	90	90	90	29.6	26.6428	12.8	5.03587	4.4	2.93939	70.3668	67.0928	18.642	1.94873	1.858	0.416	1.1986	0.0858548	206.2	68.9939	1.13	0.601997	2.53	1.11528	93.6556	59.7034	2.86e-07	3.56e-07	5.81595	7.15368	1401.32	1623.21	618.28	711.008	92.76	75.7382	4.7732	6.53713
924	Ce1Cr1O3	Pm-3m	221	cubic	1.752	6.73611	-2.993	59.1903	5	3.89718	3.89718	3.89718	90	90	90	21.2	19.4155	11.6	5.42586	3.6	2.33238	48.0221	48.1112	16	4.57073	1.808	0.370643	1.16	0.130231	196.6	58.6706	1.012	0.486555	2.62	1.01871	109.99	37.9537	1.73e-07	2.88e-07	21.0159	36.7387	1369.52	1581.92	682.48	845.357	92.76	75.7382	5.3332	7.85408
925	Dy1B1O3	Pm-3m	221	cubic	3.002	8.91528	-2.526	41.2205	5	3.45439	3.45439	3.45439	90	90	90	19	23.5287	14.6	1.74356	3.2	2.4	44.2618	59.1532	15.096	5.39101	1.758	0.316506	1.0642	0.330894	184.6	50.8708	0.912	0.450706	2.716	0.923853	89.9834	63.0334	200000000000	400000000000	7.61595	10.5829	1462.12	1734.42	838.68	983.086	92.76	75.7382	12.3532	19.2891
927	Dy1Er1O3	Pm-3m	221	cubic	1.781	8.39676	-3.004	74.7051	5	4.21163	4.21163	4.21163	90	90	90	31.6	28.9109	14.8	1.6	4.4	2.93939	75.5514	72.9516	17.91	0.695701	1.832	0.382173	1.1882	0.0935573	202	63.6899	1.098	0.561013	2.556	1.08269	84.5856	69.0639	3.57e-07	4.38e-07	5.21595	6.4803	1250.32	1424.04	729.28	826.966	92.76	75.7382	6.3332	7.98525
928	Ac1B1O3	Pm-3m	221	cubic	1.071	9.42158	-2.316	50.3734	5	3.69318	3.69318	3.69318	90	90	90	23.6	32.7206	12.8	5.03587	3.4	2.8	57.1618	84.9429	15.804	6.05064	1.79	0.373631	1.09	0.34	185	51.6294	0.954	0.533652	2.69	0.966437	96.7374	54.2234	200000000000	400000000000	7.81595	10.6542	1608.72	1870.34	767.28	930.972	92.76	75.7382	12.9332	19.2863
929	Ce1Ho1O3	Pm-3m	221	cubic	1.935	7.49313	-3.206	78.2375	5	4.27699	4.27699	4.27699	90	90	90	29.8	26.8507	13	4.64758	4.4	2.93939	70.6089	67.3415	18.302	1.30817	1.856	0.41326	1.1802	0.0985097	204.2	66.4	1.11	0.575847	2.534	1.11016	97.1296	57.2463	3.11e-07	3.81e-07	5.41595	6.78734	1379.32	1591.76	593.28	692.313	92.76	75.7382	4.6332	6.51253
931	Lu1B1O3	Pm-3m	221	cubic	3.125	9.82656	-2.525	39.5046	5	3.40578	3.40578	3.40578	90	90	90	20	25.5265	15.6	1.35647	3.2	2.4	46.7552	64.1374	14.85	5.23253	1.744	0.292411	1.0382	0.329729	181	44.109	0.9	0.427083	2.726	0.907736	96.5454	54.4473	200000000000	400000000000	8.61595	11.08	1629.12	1892.08	887.68	1028.84	92.76	75.7382	14.5332	19.6371
932	Ce1Ga1O3	Pm-3m	221	cubic	3.165	7.2984	-2.788	58.6634	5	3.88558	3.88558	3.88558	90	90	90	22.6	19.8151	13	4.64758	3.6	2.33238	51.5674	48.9198	16.914	2.86384	1.77	0.352136	1.124	0.194895	194	56.7239	0.998	0.479016	2.65	0.991847	105.428	44.0523	1.76e-07	2.87e-07	8.01595	11.3201	1276.12	1497.75	307.062	392.416	92.76	75.7382	2.3512	2.60788
933	Ac1Dy1O3	Pm-3m	221	cubic	2.721	8.92844	-3.391	81.3673	5	4.33328	4.33328	4.33328	90	90	90	35.8	34.8161	12.6	5.04381	4.6	3.2	87.4996	89.9136	18.728	2.01502	1.868	0.429204	1.2342	0.0516	202.8	64.6696	1.146	0.623269	2.526	1.12017	91.3396	61.7228	1.85e-07	3.7e-07	4.61595	5.62969	1336.72	1544.17	633.48	717.67	92.76	75.7382	5.1532	6.10869
934	La1Ce1O3	Pm-3m	221	cubic	0.408	5.59504	-2.7	97.0554	5	4.59558	4.59558	4.59558	90	90	90	27.8	24.252	11	6.13188	4.4	2.93939	65.4039	60.5092	19.032	2.11716	1.882	0.443369	1.2064	0.0718042	207.2	70.1267	1.14	0.613188	2.508	1.14148	106.2	42.9449	2.71e-07	3.34e-07	4.81595	5.89975	1529.32	1762.9	485.08	528.464	92.76	75.7382	2.4732	2.76602
935	Er1Ga1O3	Pm-3m	221	cubic	3.099	8.68347	-2.655	54.4968	5	3.79132	3.79132	3.79132	90	90	90	24.6	23.4572	15	1.26491	3.6	2.33238	56.996	58.9272	16.468	2.37256	1.744	0.304802	1.114	0.198151	192.2	53.7788	0.984	0.454603	2.674	0.955314	92.8836	60.3445	2e-07	3.34e-07	8.81595	11.6396	1177.72	1348.38	453.862	680.884	92.76	75.7382	5.2312	7.62337
936	La1Cr1O3	Pm-3m	221	cubic	1.8	6.7066	-3.083	59.1511	5	3.89632	3.89632	3.89632	90	90	90	21	19.0368	11.4	5.71314	3.6	2.33238	47.78	47.648	16.34	4.95411	1.81	0.373952	1.1784	0.123977	198.6	61.8372	1.032	0.521014	2.616	1.02461	106.516	42.6285	1.48e-07	2.38e-07	21.4159	36.6382	1391.52	1613.69	707.48	858.14	92.76	75.7382	5.4732	7.86204
937	Nb1Ga1O3	Pm-3m	221	cubic	0.313	5.38347	-2.162	64.9684	5	4.02007	4.02007	4.02007	90	90	90	19.2	14.0769	13.2	4.26146	3	1.26491	42.1255	32.8269	14.942	2.97728	1.722	0.266113	1.072	0.231032	187.6	46.6716	0.942	0.384312	2.744	0.855257	110.56	40.0948	5.84e-08	7.16e-08	16.6159	21.8016	1552.92	1963.28	643.462	1057.64	92.76	75.7382	6.6112	10.3063
938	Dy1Ho1O3	Pm-3m	221	cubic	1.781	8.20196	-2.956	76.0079	5	4.23597	4.23597	4.23597	90	90	90	31.4	28.6608	14.6	1.74356	4.4	2.93939	75.0857	72.3697	17.966	0.74709	1.834	0.384583	1.1904	0.0898679	202.8	64.6696	1.102	0.565841	2.554	1.08513	84.5856	69.0639	3.48e-07	4.28e-07	5.41595	6.78734	1220.72	1385.44	715.68	809.59	92.76	75.7382	5.7532	7.02654
939	Ac1Ho1O3	Pm-3m	221	cubic	2.72	9.11445	-3.434	80.1495	5	4.31155	4.31155	4.31155	90	90	90	36	34.9914	12.8	5.03587	4.6	3.2	87.9857	90.3233	18.674	2.01035	1.866	0.427158	1.2162	0.0876	203.2	65.1564	1.144	0.62118	2.528	1.11784	91.3396	61.7228	1.63e-07	3.26e-07	5.61595	6.96143	1367.32	1574.86	644.28	733.568	92.76	75.7382	6.3332	7.54454
940	Ac1La1O3	Pm-3m	221	cubic	1.423	7.23997	-2.983	94.9318	5	4.56181	4.56181	4.56181	90	90	90	34	33.4126	10.8	6.36867	4.6	3.2	82.7807	86.4042	19.404	2.50389	1.892	0.455781	1.2424	0.0352	206.2	68.9939	1.174	0.654388	2.502	1.14882	100.41	49.8183	1.23e-07	2.46e-07	5.01595	6.11888	1517.32	1748.68	536.08	590.877	92.76	75.7382	4.1732	5.43157
941	Dy1Al1O3	Pm-3m	221	cubic	3.099	7.89775	-3.459	49.9312	5	3.68234	3.68234	3.68234	90	90	90	20.6	22.7824	14.6	1.74356	3.4	2.33238	47.4959	57.6591	16.218	3.174	1.742	0.309864	1.1172	0.226675	191.2	53.4767	0.992	0.466064	2.63	0.99968	92.938	60.2983	1.91e-07	3.68e-07	49.2159	92.9892	1180.52	1335.45	555.574	657.185	92.76	75.7382	4.4932	5.23266
942	Nd1Dy1O3	Pm-3m	221	cubic	1.704	7.48945	-3.089	78.652	5	4.28453	4.28453	4.28453	90	90	90	30	27.0111	13.2	3.91918	4.4	2.93939	70.948	67.5453	18.336	1.29557	1.852	0.407402	1.2375	0.0536321	205.2	67.7507	1.12	0.588422	2.536	1.10746	84.5856	69.0639	3.14e-07	3.95e-07	5.61595	7.10363	1296.72	1487.26	628.28	712.733	92.76	75.7382	3.7732	4.52952
943	Lu1Cr1O3	Pm-3m	221	cubic	1.752	8.34649	-2.782	54.7037	5	3.79611	3.79611	3.79611	90	90	90	23.8	24.4	14.2	4.11825	3.6	2.33238	54.9923	61.5861	15.418	4.09723	1.772	0.313841	1.1442	0.143131	191.6	51.2664	0.992	0.453008	2.65	0.975377	104.008	46.359	1.41e-07	2.25e-07	22.0159	36.5198	1377.92	1593.98	853.88	981.986	92.76	75.7382	8.6332	10.3125
944	Nd1Al1O3	Pm-3m	221	cubic	2.932	6.92136	-3.485	52.5946	5	3.74668	3.74668	3.74668	90	90	90	19.4	20.3922	13.4	3.87814	3.4	2.33238	43.8443	50.3787	16.534	3.49832	1.758	0.339435	1.1463	0.235737	194	58.258	1.008	0.494061	2.614	1.0225	92.938	60.2983	1.34e-07	2.55e-07	50.4159	92.5258	1287.12	1477.39	478.974	532.072	92.76	75.7382	3.6932	4.40112
945	Gd1In1O3	Pm-3m	221	cubic	1.499	8.00269	-2.182	66.413	5	4.04965	4.04965	4.04965	90	90	90	27.4	24.2289	14.2	2.4	3.8	2.4	64.0132	60.3162	17.548	1.32928	1.766	0.328	1.159	0.130859	194.4	55.5575	1.032	0.496484	2.662	0.96975	90.3656	62.6549	2.78e-07	5.17e-07	18.6159	31.9757	1227.72	1442.12	435.83	592.652	92.76	75.7382	2.7852	3.79444
946	Gd1Dy1O3	Pm-3m	221	cubic	1.31	7.61652	-2.789	80.1757	5	4.31202	4.31202	4.31202	90	90	90	30.8	27.9313	14	2.52982	4.4	2.93939	73.5496	70.5039	18.198	1.06423	1.842	0.394482	1.1972	0.0789263	202	63.6899	1.108	0.573215	2.55	1.09003	84.5856	69.0639	4.47e-07	5.61e-07	4.41595	5.37586	1326.72	1529.75	685.88	773.496	92.76	75.7382	4.3532	5.07161
947	Bi1B1O3	Pm-3m	221	cubic	2.442	9.88731	-1.178	44.9743	5	3.55622	3.55622	3.55622	90	90	90	22.4	30.3223	15.2	1.16619	2.8	1.6	53.5579	77.7372	15.556	5.78881	1.71	0.237487	1.045	0.329242	184.4	50.492	0.852	0.333131	2.876	0.690785	108.168	44.9811	200000000000	400000000000	7.01595	10.4583	1261.52	1617.52	611.56	889.174	92.76	75.7382	12.3132	19.2919
948	Gd1Lu1O3	Pm-3m	221	cubic	1.993	8.80261	-3.203	71.7245	5	4.15485	4.15485	4.15485	90	90	90	31.8	29.2329	15	2.52982	4.4	2.93939	76.043	73.7513	17.952	0.98749	1.828	0.378545	1.1712	0.111246	198.4	59.4932	1.096	0.559056	2.56	1.07794	91.1476	61.9028	3.78e-07	5.17e-07	5.41595	6.78734	1493.72	1719.63	734.88	839.835	92.76	75.7382	6.5332	8.61086
949	Ho1In1O3	Pm-3m	221	cubic	1.521	7.96013	-2.123	68.3703	5	4.08905	4.08905	4.08905	90	90	90	28	25.1476	14.8	1.46969	3.8	2.4	65.5493	62.7209	17.316	0.943898	1.758	0.314096	1.1522	0.135836	195.2	56.7852	1.026	0.487015	2.666	0.963776	90.3656	62.6549	1.79e-07	3.19e-07	19.6159	31.7996	1121.72	1279.86	465.63	650.599	92.76	75.7382	4.1852	6.51454
950	Cr1Bi1O3	Pm-3m	221	cubic	0.36	8.72703	-1.79	58.7903	5	3.88838	3.88838	3.88838	90	90	90	26.2	29.0682	13.8	3.91918	3.2	1.6	61.7949	74.9016	16.124	4.70278	1.738	0.267013	1.151	0.136836	195	56.2139	0.944	0.377656	2.8	0.792061	115.63	32.1634	2.85e-07	5.1e-07	20.4159	36.9214	1010.32	1180.03	577.76	823.255	92.76	75.7382	6.4132	8.16777
951	Er1Cr1O3	Pm-3m	221	cubic	1.806	8.02944	-2.848	55.2697	5	3.80916	3.80916	3.80916	90	90	90	23.2	23.2413	13.6	3.87814	3.6	2.33238	53.4507	58.5871	15.554	4.18375	1.782	0.329023	1.15	0.137695	194.8	55.9121	0.998	0.462964	2.644	0.983902	97.4456	57.0596	1.97e-07	3.35e-07	21.8159	36.555	1271.12	1447.67	829.28	956.043	92.76	75.7382	8.2132	9.78902
952	Dy1Lu1O3	Pm-3m	221	cubic	0.591	8.34836	-2.753	76.6714	5	4.24826	4.24826	4.24826	90	90	90	32.2	29.681	15.4	1.74356	4.4	2.93939	77.093	74.9279	17.774	0.639049	1.822	0.370535	1.1824	0.10355	198.8	60.038	1.092	0.55391	2.562	1.07544	91.1476	61.9028	3.01e-07	3.85e-07	5.41595	6.78734	1357.12	1573.96	753.88	859.693	92.76	75.7382	6.7532	8.7101
953	Ac1Gd1O3	Pm-3m	221	cubic	2.4	8.53897	-3.294	84.0576	5	4.38052	4.38052	4.38052	90	90	90	35.4	34.4767	12.2	5.15364	4.6	3.2	86.4496	89.0582	18.906	2.07061	1.874	0.435504	1.223	0.074	202.4	64.1891	1.15	0.627503	2.524	1.12251	91.3396	61.7228	2.62e-07	5.24e-07	4.61595	5.62969	1473.32	1694.04	614.48	690.454	92.76	75.7382	4.9332	5.90704
954	Ac1Lu1O3	Pm-3m	221	cubic	3.213	9.84384	-3.586	75.9038	5	4.23404	4.23404	4.23404	90	90	90	36.8	35.729	13.6	5.31413	4.6	3.2	89.993	92.105	18.482	2.04049	1.854	0.41548	1.2082	0.1036	199.2	60.5884	1.134	0.611019	2.536	1.10863	97.9016	52.756	1.16e-07	2.32e-07	5.61595	6.96143	1503.72	1731.5	682.48	791.968	92.76	75.7382	7.3332	9.06939
955	Lu1In1O3	Pm-3m	221	cubic	0.993	8.28011	-2.01	67.7409	5	4.07646	4.07646	4.07646	90	90	90	28.8	26.4076	15.6	1.35647	3.8	2.4	67.5566	65.9471	17.124	0.701131	1.746	0.293639	1.1442	0.143131	191.2	50.8543	1.016	0.471491	2.674	0.951916	96.9276	53.9622	1.32e-07	2.26e-07	19.6159	31.7996	1258.12	1490.95	503.83	725.272	92.76	75.7382	5.1852	8.48933
956	Ce1Fe1O3	Pm-3m	221	cubic	0.336	6.73833	-2.57	60.1193	5	3.91746	3.91746	3.91746	90	90	90	21.6	19.4895	12	5.05964	3.6	2.33238	48.7918	48.1993	15.972	4.62448	1.804	0.368	1.1425	0.160888	196.4	58.5068	1	0.48	2.654	0.988486	100.043	52.3934	1.68e-07	2.89e-07	18.2159	31.183	1407.52	1621.08	608.68	717.899	92.76	75.7382	3.9932	5.31243
958	Ho1Er1O3	Pm-3m	221	cubic	1.68	8.47078	-2.975	74.5287	5	4.20831	4.20831	4.20831	90	90	90	31.8	29.1506	15	1.26491	4.4	2.93939	76.0375	73.535	17.856	0.613892	1.83	0.379684	1.1702	0.110037	202.4	64.1891	1.096	0.558519	2.558	1.08023	84.5856	69.0639	3.35e-07	4.1e-07	6.21595	7.58699	1280.92	1459.08	740.08	839.569	92.76	75.7382	7.5132	8.97683
959	Nb1Cu1O3	Pm-3m	221	cubic	1.569	5.45967	-1.922	62.1829	5	3.96178	3.96178	3.96178	90	90	90	18.8	13.7608	12.8	4.35431	3	1.26491	40.8901	31.8673	14.004	4.27527	1.74	0.27828	1.084	0.215555	188.8	47.8598	0.94	0.382832	2.762	0.836144	126.094	20.6629	3.38e-08	5.95e-08	90.8159	155.999	1697.52	2050.7	854.434	1073.76	92.76	75.7382	8.1132	10.5913
960	Ho1Lu1O3	Pm-3m	221	cubic	0.884	8.50414	-2.808	75.7415	5	4.23102	4.23102	4.23102	90	90	90	32.4	29.9105	15.6	1.35647	4.4	2.93939	77.5791	75.4862	17.72	0.535313	1.82	0.367913	1.1644	0.117767	199.2	60.5884	1.09	0.551362	2.564	1.07295	91.1476	61.9028	2.79e-07	3.49e-07	6.41595	7.82535	1387.72	1603.7	764.68	871.517	92.76	75.7382	7.9332	9.57569
961	Ce1Nd1O3	Pm-3m	221	cubic	1.055	6.14206	-2.776	89.8542	5	4.47898	4.47898	4.47898	90	90	90	28.4	24.9928	11.6	5.42586	4.4	2.93939	66.4712	61.8289	18.672	1.60718	1.874	0.433663	1.2273	0.0739267	206.6	69.3559	1.128	0.597809	2.516	1.13168	97.1296	57.2463	2.77e-07	3.4e-07	5.61595	7.10363	1455.32	1673.94	505.88	557.184	92.76	75.7382	2.6532	3.02028
962	La1Gd1O3	Pm-3m	221	cubic	1.561	6.93866	-3.149	82.3618	5	4.35086	4.35086	4.35086	90	90	90	29	25.8147	12.2	5.15364	4.4	2.93939	68.8307	64.9644	18.874	2.01452	1.866	0.424716	1.2054	0.0735706	205.4	68.1164	1.136	0.608658	2.526	1.11996	93.6556	59.7034	3.85e-07	5.2e-07	4.81595	5.89975	1507.32	1737	588.48	665.273	92.76	75.7382	3.3732	4.04216
963	La1Ga1O3	Pm-3m	221	cubic	3.561	7.28128	-2.872	58.5252	5	3.88253	3.88253	3.88253	90	90	90	22.4	19.4587	12.8	5.03587	3.6	2.33238	51.3253	48.482	17.254	3.35137	1.772	0.355831	1.1424	0.194214	196	60.0799	1.018	0.514525	2.646	0.99803	101.954	47.8081	1.51e-07	2.38e-07	8.41595	11.453	1298.12	1532.61	332.062	441.064	92.76	75.7382	2.4912	2.78588
964	Eu1Ge1O3	Pm-3m	221	cubic	1.163	8.58151	-2.693	52.7491	5	3.75035	3.75035	3.75035	90	90	90	23.8	21.6924	14.2	2.71293	3.6	2.33238	54.5204	53.4325	18.936	5.22085	1.804	0.356011	1.1497	0.191338	192.4	54.6648	0.99	0.472694	2.704	0.937968	125.046	22.5214	0.00010018	0.00019991	14.8159	23.2312	1032.72	1224.62	494.96	540.254	92.76	75.7382	8.3332	12.2378
966	Nd1In1O3	Pm-3m	221	cubic	1.876	7.3291	-2.307	69.5696	5	4.11282	4.11282	4.11282	90	90	90	26.6	23.0443	13.4	3.87814	3.8	2.4	61.4116	56.3914	17.686	1.5787	1.776	0.345636	1.1993	0.129807	197.6	60.5726	1.044	0.515736	2.648	0.990886	90.3656	62.6549	1.45e-07	2.51e-07	19.8159	31.7794	1197.72	1394.84	378.23	481.791	92.76	75.7382	2.2052	2.71554
967	Dy1In1O3	Pm-3m	221	cubic	1.635	7.97666	-2.146	67.7226	5	4.0761	4.0761	4.0761	90	90	90	27.8	24.8387	14.6	1.74356	3.8	2.4	65.0632	61.9536	17.37	1.02781	1.76	0.317553	1.1702	0.125476	194.8	56.169	1.028	0.490159	2.664	0.96676	90.3656	62.6549	2.01e-07	3.64e-07	18.6159	31.9757	1091.12	1235.83	454.83	629.562	92.76	75.7382	3.0052	4.21496
968	Ce1In1O3	Pm-3m	221	cubic	1.83	7.21188	-2.358	69.7503	5	4.11638	4.11638	4.11638	90	90	90	26.2	22.4713	13	4.64758	3.8	2.4	60.5864	55.1906	17.706	1.61557	1.782	0.356337	1.16	0.130231	196.2	58.3452	1.036	0.502856	2.644	0.996987	102.91	47.8326	1.64e-07	2.9e-07	18.6159	31.9757	1249.72	1477.37	332.43	395.416	92.76	75.7382	1.8852	2.15664
969	Cs1Nb1O3	Pm-3m	221	cubic	1.409	6.40915	-2.431	70.9411	5	4.13967	4.13967	4.13967	90	90	90	24	20.0898	10.8	6.49307	3.4	1.74356	54.762	49.1305	26.77	22.2293	2.034	0.743333	1.282	0.314223	210.8	79.946	1.172	0.701267	2.54	1.13093	111.363	38.7201	7.24e-08	9.05e-08	18.0159	22.7558	1246.32	1914.12	643.198	1057.73	480.36	731.275	5.9112	10.4694
970	La1Ce1O3	Pm-3m	221	cubic	0.687	5.73351	-2.7	94.7114	5	4.55828	4.55828	4.55828	90	90	90	27.8	24.252	11	6.13188	4.4	2.93939	65.4039	60.5092	19.032	2.11716	1.882	0.443369	1.2064	0.0718042	207.2	70.1267	1.14	0.613188	2.508	1.14148	106.2	42.9449	2.71e-07	3.34e-07	4.81595	5.89975	1529.32	1762.9	485.08	528.464	92.76	75.7382	2.4732	2.76602
971	Ac1La1O3	Pm-3m	221	cubic	0.273	6.67653	-2.568	102.943	5	4.68669	4.68669	4.68669	90	90	90	34	33.4126	10.8	6.36867	4.6	3.2	82.7807	86.4042	19.404	2.50389	1.892	0.455781	1.2424	0.0352	206.2	68.9939	1.174	0.654388	2.502	1.14882	100.41	49.8183	1.23e-07	2.46e-07	5.01595	6.11888	1517.32	1748.68	536.08	590.877	92.76	75.7382	4.1732	5.43157
972	Mg2Ge2O6	Cmcm	63	orthorhombic	2.954	5.27328	-2.246	91.2842	10	2.81912	4.87723	6.93504	90	90	73.2014	13.6	9.32952	12.8	5.45527	2.6	0.8	28.9886	22.0615	15.942	1.74063	1.68	0.22987	1.082	0.219854	186	44.6363	0.904	0.32946	2.728	0.899675	108.373	54.8547	0.000100009	0.000199996	44.0159	62.4708	945.32	1181.58	459.76	504.288	92.76	75.7382	8.2332	12.2323
974	Mg2C2O6	R-3c	167	trigonal	5.212	3.07764	-2.289	90.9831	10	4.63274	4.63274	5.57811	114.536	114.536	60	8.4	1.95959	12.8	5.45527	2.2	0.4	16.8628	4.02903	14.274	4.6767	1.598	0.096	0.988	0.377274	175.6	39.1234	0.814	0.296081	2.836	0.837248	108.941	54.9756	2.01e-06	4e-06	60.0159	73.7434	1186.72	1632.83	977.48	1450.77	92.76	75.7382	25.2732	45.9808
975	Fe1Bi1O3	R3m	160	trigonal	1.407	8.15449	-1.524	63.7018	5	3.99451	3.99451	3.99451	88.8936	88.8936	88.8936	26.6	29.0489	14.2	3.1241	3.2	1.6	62.5647	74.8167	16.096	4.75577	1.734	0.262267	1.1335	0.16533	194.8	56.0371	0.932	0.366955	2.834	0.744623	105.684	49.5104	2.8e-07	5.11e-07	17.6159	31.3445	1048.32	1243.07	503.96	680.474	92.76	75.7382	5.0732	6.01184
976	H4I4O12	P2_12_12_1	19	orthorhombic	3.119	5.08782	-0.746	229.652	20	5.35274	5.71268	7.51023	90	90	90	15.6	18.8955	13.2	6.11228	2.4	1.35647	35.1821	46.2273	17.844	4.56074	1.5096	0.307637	1.01067	0.50536	154.8	27.2059	0.72	0.343162	3.036	0.515736	158.17	73.4089	200000000000000	400000000000000	0.141848	0.16474	149.656	156.237	113.052	137.808	263.16	281.882	1.7968	2.98444
977	Fe2Bi2O6	R3c	161	trigonal	1.419	8.36446	-1.56	124.205	10	5.57589	5.57589	5.62522	119.71	119.71	60	26.6	29.0489	14.2	3.1241	3.2	1.6	62.5647	74.8167	16.096	4.75577	1.734	0.262267	1.1335	0.16533	194.8	56.0371	0.932	0.366955	2.834	0.744623	105.684	49.5104	2.8e-07	5.11e-07	17.6159	31.3445	1048.32	1243.07	503.96	680.474	92.76	75.7382	5.0732	6.01184
979	Li8Nb8O24	P2_1/c	14	monoclinic	3.523	4.10783	-2.724	478.118	40	9.46674	8.24274	6.1274	90	90.4398	90	13.6	13.8362	10.8	6.49307	2.6	1.2	29.5691	31.8624	15.186	2.75119	1.712	0.261258	1.1	0.197585	183.6	43.4401	0.956	0.395656	2.578	1.07321	114.188	34.0442	4.94e-08	6.31e-08	27.8159	35.4185	1380.52	1911.74	673.618	1049.62	737.36	1244.26	6.0932	10.4092
981	Gd2B2O6	P6_3/mmc	194	hexagonal	2.682	4.75965	-3.222	150.757	10	5.20943	5.20951	6.41441	90	90	120	18.6	22.7297	14.2	2.4	3.2	2.4	43.2118	57.0545	15.274	5.5302	1.764	0.327023	1.053	0.329387	184.2	50.1135	0.916	0.458589	2.714	0.927094	89.9834	63.0334	200000000000	400000000000	7.61595	10.5829	1598.72	1859.91	819.68	967.436	92.76	75.7382	12.1332	19.3084
983	Ca3C3O9	C2	5	monoclinic	5.163	2.83061	-2.509	176.144	15	4.82775	5.006	8.33372	92.9362	90	118.829	10	5.05964	12.8	5.45527	2.4	0.8	20.0174	10.1486	16.714	6.65949	1.714	0.306046	1.044	0.374892	177.8	43.3793	0.882	0.43111	2.776	0.947895	109.415	54.0365	2.01e-06	4e-06	68.0159	85.4039	1265.52	1648.86	1015.88	1451.36	92.76	75.7382	25.2412	45.9924
984	Ba3Mn3O9	R-3m	166	trigonal	1.153	6.09762	-2.378	196.29	15	5.67082	5.67082	7.77146	111.398	68.6017	120	21	18.6976	11.4	5.8515	3.2	1.6	48.0526	47.1159	19.518	10.0951	1.858	0.459408	1.18367	0.2821	199.6	63.4558	1.054	0.56248	2.552	1.10742	87.3764	65.794	3.56e-07	5.58e-07	5.17595	7.08364	949.52	1054.18	536.68	612.575	92.76	75.7382	4.3732	5.34347
985	Co4Ge4O12	C2/c	15	monoclinic	0.832	5.36964	-1.691	222.127	20	5.181	6.61927	6.61927	94.1262	98.1534	81.8466	16.6	10.6508	14.2	2.71293	2.8	0.979796	35.9143	24.7728	14.476	4.16177	1.734	0.264394	1.06367	0.240459	183.8	41.5423	0.86	0.269518	2.842	0.73355	121.148	29.8823	0.000100012	0.000199994	32.0159	41.1701	1312.72	1497.66	628.76	724.655	92.76	75.7382	9.7332	12.6503
986	Co4Ge4O12	C2/c	15	monoclinic	1.386	6.25868	-1.691	190.574	20	6.28378	6.28378	4.92734	82.1352	97.8648	94.4488	16.6	10.6508	14.2	2.71293	2.8	0.979796	35.9143	24.7728	14.476	4.16177	1.734	0.264394	1.06367	0.240459	183.8	41.5423	0.86	0.269518	2.842	0.73355	121.148	29.8823	0.000100012	0.000199994	32.0159	41.1701	1312.72	1497.66	628.76	724.655	92.76	75.7382	9.7332	12.6503
987	Al2B2O6	R-3c	167	trigonal	5.602	3.60376	-2.954	79.0612	10	4.4638	4.4638	5.25676	115.124	115.124	60	8.4	2.57682	14.8	1.46969	2.2	0.4	17.1581	5.30685	13.294	5.28637	1.664	0.178168	0.973	0.361353	173.4	30.4998	0.8	0.233238	2.794	0.802785	98.3358	52.4319	200000000000	400000000000	52.4159	91.8878	1452.52	1726.88	689.374	896.883	92.76	75.7382	12.2732	19.295
988	Al2B2O6	R-3c	167	trigonal	5.241	3.60376	-2.954	79.0612	10	4.4638	4.4638	5.25676	115.124	115.124	60	8.4	2.57682	14.8	1.46969	2.2	0.4	17.1581	5.30685	13.294	5.28637	1.664	0.178168	0.973	0.361353	173.4	30.4998	0.8	0.233238	2.794	0.802785	98.3358	52.4319	200000000000	400000000000	52.4159	91.8878	1452.52	1726.88	689.374	896.883	92.76	75.7382	12.2732	19.295
989	Al2B2O6	R-3c	167	trigonal	6.029	3.70351	-2.954	76.9319	10	5.17318	5.17318	5.17318	50.9182	50.9182	50.9182	8.4	2.57682	14.8	1.46969	2.2	0.4	17.1581	5.30685	13.294	5.28637	1.664	0.178168	0.973	0.361353	173.4	30.4998	0.8	0.233238	2.794	0.802785	98.3358	52.4319	200000000000	400000000000	52.4159	91.8878	1452.52	1726.88	689.374	896.883	92.76	75.7382	12.2732	19.295
990	Al2B2O6	R-3c	167	trigonal	5.521	4.06381	-2.954	70.1109	10	4.99748	4.99748	4.99748	51.2729	51.2729	51.2729	8.4	2.57682	14.8	1.46969	2.2	0.4	17.1581	5.30685	13.294	5.28637	1.664	0.178168	0.973	0.361353	173.4	30.4998	0.8	0.233238	2.794	0.802785	98.3358	52.4319	200000000000	400000000000	52.4159	91.8878	1452.52	1726.88	689.374	896.883	92.76	75.7382	12.2732	19.295
991	La1Al1O3	Pm-3m	221	cubic	3.523	6.51969	-3.553	54.4757	5	3.79083	3.79083	3.79083	90.0865	90.0865	90.0865	18.8	19.1979	12.8	5.03587	3.4	2.33238	42.777	48.252	16.894	3.95941	1.766	0.354378	1.1254	0.227764	194.6	59.3013	1.02	0.515364	2.606	1.03409	102.008	47.7393	1.28e-07	2.44e-07	49.6159	92.8281	1361.12	1585.34	458.174	500.801	92.76	75.7382	3.5132	4.27469
992	La1Al1O3	Pm-3m	221	cubic	2.865	6.51969	-3.553	54.4757	5	3.79083	3.79083	3.79083	90.0865	90.0865	90.0865	18.8	19.1979	12.8	5.03587	3.4	2.33238	42.777	48.252	16.894	3.95941	1.766	0.354378	1.1254	0.227764	194.6	59.3013	1.02	0.515364	2.606	1.03409	102.008	47.7393	1.28e-07	2.44e-07	49.6159	92.8281	1361.12	1585.34	458.174	500.801	92.76	75.7382	3.5132	4.27469
993	La1Al1O3	Pm-3m	221	cubic	3.647	6.69527	-3.553	53.0471	5	3.75739	3.7574	3.7574	90.0048	89.9953	90.0047	18.8	19.1979	12.8	5.03587	3.4	2.33238	42.777	48.252	16.894	3.95941	1.766	0.354378	1.1254	0.227764	194.6	59.3013	1.02	0.515364	2.606	1.03409	102.008	47.7393	1.28e-07	2.44e-07	49.6159	92.8281	1361.12	1585.34	458.174	500.801	92.76	75.7382	3.5132	4.27469
994	La1Al1O3	Pm-3m	221	cubic	3.502	7.24119	-3.553	49.0479	5	3.6605	3.6605	3.6605	90.0006	89.9994	90.0006	18.8	19.1979	12.8	5.03587	3.4	2.33238	42.777	48.252	16.894	3.95941	1.766	0.354378	1.1254	0.227764	194.6	59.3013	1.02	0.515364	2.606	1.03409	102.008	47.7393	1.28e-07	2.44e-07	49.6159	92.8281	1361.12	1585.34	458.174	500.801	92.76	75.7382	3.5132	4.27469
995	La2Cr2O6	R-3c	167	trigonal	1.604	6.72874	-3.156	117.913	10	5.47823	5.47823	5.47823	119.368	119.368	60.6322	21	19.0368	11.4	5.71314	3.6	2.33238	47.78	47.648	16.34	4.95411	1.81	0.373952	1.1784	0.123977	198.6	61.8372	1.032	0.521014	2.616	1.02461	106.516	42.6285	1.48e-07	2.38e-07	21.4159	36.6382	1391.52	1613.69	707.48	858.14	92.76	75.7382	5.4732	7.86204
996	La2Cr2O6	R-3c	167	trigonal	0.812	6.72874	-3.156	117.913	10	5.47823	5.47823	5.47823	119.368	119.368	60.6322	21	19.0368	11.4	5.71314	3.6	2.33238	47.78	47.648	16.34	4.95411	1.81	0.373952	1.1784	0.123977	198.6	61.8372	1.032	0.521014	2.616	1.02461	106.516	42.6285	1.48e-07	2.38e-07	21.4159	36.6382	1391.52	1613.69	707.48	858.14	92.76	75.7382	5.4732	7.86204
997	La2Cr2O6	R-3c	167	trigonal	2.085	6.92363	-3.156	114.594	10	5.40238	5.40239	5.40238	61.2374	61.2372	61.2373	21	19.0368	11.4	5.71314	3.6	2.33238	47.78	47.648	16.34	4.95411	1.81	0.373952	1.1784	0.123977	198.6	61.8372	1.032	0.521014	2.616	1.02461	106.516	42.6285	1.48e-07	2.38e-07	21.4159	36.6382	1391.52	1613.69	707.48	858.14	92.76	75.7382	5.4732	7.86204
998	Gd1Co1O3	Pmmm	47	orthorhombic	0.39	8.51817	-2.327	51.4997	5	3.72	3.796	3.647	90	90	90	23	21.7807	13.4	3.2	3.6	2.33238	52.8363	54.791	15.73	4.63558	1.78	0.336095	1.12467	0.192034	193.8	55.0433	0.984	0.467401	2.682	0.952227	97.3602	57.1094	2.74e-07	5.19e-07	22.2159	39.1235	1398.72	1605.85	703.48	796.572	92.76	75.7382	5.3732	6.60653
999	Gd1Co1O3	Pmmm	47	orthorhombic	0.498	9.48727	-2.327	46.2392	5	3.58907	3.60593	3.57282	90	90	90	23	21.7807	13.4	3.2	3.6	2.33238	52.8363	54.791	15.73	4.63558	1.78	0.336095	1.12467	0.192034	193.8	55.0433	0.984	0.467401	2.682	0.952227	97.3602	57.1094	2.74e-07	5.19e-07	22.2159	39.1235	1398.72	1605.85	703.48	796.572	92.76	75.7382	5.3732	6.60653
1002	Nd4Ga4O12	Pnma	62	orthorhombic	3.827	8.34117	-2.879	208.604	20	5.27622	5.29423	7.46787	90	90	90	23	20.5329	13.4	3.87814	3.6	2.33238	52.3926	50.4183	16.894	2.83763	1.764	0.341092	1.1633	0.201751	195.4	59.0647	1.006	0.493137	2.654	0.98569	92.8836	60.3445	1.57e-07	2.49e-07	9.21595	11.8772	1224.12	1417.37	352.862	481.75	92.76	75.7382	2.6712	3.03741
1003	Nd4Ga4O12	Pnma	62	orthorhombic	4.175	7.63737	-2.879	227.827	20	5.41776	5.47197	7.68497	90	90	90	23	20.5329	13.4	3.87814	3.6	2.33238	52.3926	50.4183	16.894	2.83763	1.764	0.341092	1.1633	0.201751	195.4	59.0647	1.006	0.493137	2.654	0.98569	92.8836	60.3445	1.57e-07	2.49e-07	9.21595	11.8772	1224.12	1417.37	352.862	481.75	92.76	75.7382	2.6712	3.03741
1004	La2Ga2O6	R3c	161	trigonal	3.869	7.2037	-2.928	118.311	10	5.47682	5.47682	5.47682	60.8197	119.18	119.18	22.4	19.4587	12.8	5.03587	3.6	2.33238	51.3253	48.482	17.254	3.35137	1.772	0.355831	1.1424	0.194214	196	60.0799	1.018	0.514525	2.646	0.99803	101.954	47.8081	1.51e-07	2.38e-07	8.41595	11.453	1298.12	1532.61	332.062	441.064	92.76	75.7382	2.4912	2.78588
1005	La2Ga2O6	R3c	161	trigonal	4.182	7.19071	-2.928	118.525	10	5.49182	5.49182	5.49182	119.469	60.5305	119.469	22.4	19.4587	12.8	5.03587	3.6	2.33238	51.3253	48.482	17.254	3.35137	1.772	0.355831	1.1424	0.194214	196	60.0799	1.018	0.514525	2.646	0.99803	101.954	47.8081	1.51e-07	2.38e-07	8.41595	11.453	1298.12	1532.61	332.062	441.064	92.76	75.7382	2.4912	2.78588
1006	La2Ga2O6	R-3c	167	trigonal	4.038	7.35365	-2.928	115.899	10	5.43969	5.43969	5.43969	60.8109	60.8109	60.8109	22.4	19.4587	12.8	5.03587	3.6	2.33238	51.3253	48.482	17.254	3.35137	1.772	0.355831	1.1424	0.194214	196	60.0799	1.018	0.514525	2.646	0.99803	101.954	47.8081	1.51e-07	2.38e-07	8.41595	11.453	1298.12	1532.61	332.062	441.064	92.76	75.7382	2.4912	2.78588
1007	La2Ga2O6	R3c	161	trigonal	2.963	7.19071	-2.928	118.525	10	5.49182	5.49182	5.49182	119.469	60.5305	119.469	22.4	19.4587	12.8	5.03587	3.6	2.33238	51.3253	48.482	17.254	3.35137	1.772	0.355831	1.1424	0.194214	196	60.0799	1.018	0.514525	2.646	0.99803	101.954	47.8081	1.51e-07	2.38e-07	8.41595	11.453	1298.12	1532.61	332.062	441.064	92.76	75.7382	2.4912	2.78588
1008	La2Ga2O6	R3c	161	trigonal	3.899	8.00356	-2.928	106.487	10	5.28945	5.28945	5.28945	60.7806	60.7806	60.7806	22.4	19.4587	12.8	5.03587	3.6	2.33238	51.3253	48.482	17.254	3.35137	1.772	0.355831	1.1424	0.194214	196	60.0799	1.018	0.514525	2.646	0.99803	101.954	47.8081	1.51e-07	2.38e-07	8.41595	11.453	1298.12	1532.61	332.062	441.064	92.76	75.7382	2.4912	2.78588
1009	La2Ga2O6	R-3c	167	trigonal	3.87	7.17315	-2.93	118.815	10	5.48935	5.48935	5.48935	119.298	60.7017	119.298	22.4	19.4587	12.8	5.03587	3.6	2.33238	51.3253	48.482	17.254	3.35137	1.772	0.355831	1.1424	0.194214	196	60.0799	1.018	0.514525	2.646	0.99803	101.954	47.8081	1.51e-07	2.38e-07	8.41595	11.453	1298.12	1532.61	332.062	441.064	92.76	75.7382	2.4912	2.78588
1010	La2Ga2O6	R-3c	167	trigonal	4.18	6.93321	-2.93	122.927	10	5.57236	5.57236	5.57236	119.792	60.2084	119.792	22.4	19.4587	12.8	5.03587	3.6	2.33238	51.3253	48.482	17.254	3.35137	1.772	0.355831	1.1424	0.194214	196	60.0799	1.018	0.514525	2.646	0.99803	101.954	47.8081	1.51e-07	2.38e-07	8.41595	11.453	1298.12	1532.61	332.062	441.064	92.76	75.7382	2.4912	2.78588
1011	La2Ga2O6	R-3c	167	trigonal	4.039	7.33414	-2.93	116.207	10	5.44593	5.44593	5.44593	60.7753	60.7753	60.7753	22.4	19.4587	12.8	5.03587	3.6	2.33238	51.3253	48.482	17.254	3.35137	1.772	0.355831	1.1424	0.194214	196	60.0799	1.018	0.514525	2.646	0.99803	101.954	47.8081	1.51e-07	2.38e-07	8.41595	11.453	1298.12	1532.61	332.062	441.064	92.76	75.7382	2.4912	2.78588
1012	La2Ga2O6	R-3c	167	trigonal	2.554	6.93321	-2.93	122.927	10	5.57236	5.57236	5.57236	119.792	60.2084	119.792	22.4	19.4587	12.8	5.03587	3.6	2.33238	51.3253	48.482	17.254	3.35137	1.772	0.355831	1.1424	0.194214	196	60.0799	1.018	0.514525	2.646	0.99803	101.954	47.8081	1.51e-07	2.38e-07	8.41595	11.453	1298.12	1532.61	332.062	441.064	92.76	75.7382	2.4912	2.78588
1013	La2Ga2O6	R-3c	167	trigonal	3.898	7.90939	-2.93	107.755	10	5.31596	5.31596	5.31596	60.6376	60.6376	60.6376	22.4	19.4587	12.8	5.03587	3.6	2.33238	51.3253	48.482	17.254	3.35137	1.772	0.355831	1.1424	0.194214	196	60.0799	1.018	0.514525	2.646	0.99803	101.954	47.8081	1.51e-07	2.38e-07	8.41595	11.453	1298.12	1532.61	332.062	441.064	92.76	75.7382	2.4912	2.78588
1014	Co2C2O6	R-3c	167	trigonal	2.426	4.52833	-1.321	87.2322	10	5.42799	5.42799	5.42799	50.3177	50.3177	50.3177	11.4	7.83837	14.2	2.71293	2.4	0.8	23.7884	17.6402	12.808	5.59209	1.652	0.187446	0.969667	0.385193	173.4	34.9033	0.77	0.20938	2.95	0.636428	121.715	29.8619	2.01e-06	3.99e-06	48.0159	60.1205	1554.12	1826.36	1146.48	1483.43	92.76	75.7382	26.7732	45.5358
1015	Co2C2O6	R-3c	167	trigonal	1.235	4.16154	-1.321	94.9207	10	4.66586	4.66586	5.71	65.885	65.885	60	11.4	7.83837	14.2	2.71293	2.4	0.8	23.7884	17.6402	12.808	5.59209	1.652	0.187446	0.969667	0.385193	173.4	34.9033	0.77	0.20938	2.95	0.636428	121.715	29.8619	2.01e-06	3.99e-06	48.0159	60.1205	1554.12	1826.36	1146.48	1483.43	92.76	75.7382	26.7732	45.5358
1016	Co2C2O6	R-3c	167	trigonal	1.743	5.12017	-1.321	77.149	10	5.24176	5.24176	5.24176	49.7439	49.7439	49.7439	11.4	7.83837	14.2	2.71293	2.4	0.8	23.7884	17.6402	12.808	5.59209	1.652	0.187446	0.969667	0.385193	173.4	34.9033	0.77	0.20938	2.95	0.636428	121.715	29.8619	2.01e-06	3.99e-06	48.0159	60.1205	1554.12	1826.36	1146.48	1483.43	92.76	75.7382	26.7732	45.5358
1017	Nd4Ga4O12	Pnma	62	orthorhombic	2.832	7.44915	-2.89	233.584	20	5.46245	5.51373	7.7555	90	90	90	23	20.5329	13.4	3.87814	3.6	2.33238	52.3926	50.4183	16.894	2.83763	1.764	0.341092	1.1633	0.201751	195.4	59.0647	1.006	0.493137	2.654	0.98569	92.8836	60.3445	1.57e-07	2.49e-07	9.21595	11.8772	1224.12	1417.37	352.862	481.75	92.76	75.7382	2.6712	3.03741
1018	Nd4Ga4O12	Pnma	62	orthorhombic	4.681	7.44915	-2.89	233.584	20	5.46245	5.51373	7.7555	90	90	90	23	20.5329	13.4	3.87814	3.6	2.33238	52.3926	50.4183	16.894	2.83763	1.764	0.341092	1.1633	0.201751	195.4	59.0647	1.006	0.493137	2.654	0.98569	92.8836	60.3445	1.57e-07	2.49e-07	9.21595	11.8772	1224.12	1417.37	352.862	481.75	92.76	75.7382	2.6712	3.03741
1019	Nd4Ga4O12	Pnma	62	orthorhombic	3.827	8.30064	-2.89	209.622	20	5.2925	5.29371	7.48198	90	90	90	23	20.5329	13.4	3.87814	3.6	2.33238	52.3926	50.4183	16.894	2.83763	1.764	0.341092	1.1633	0.201751	195.4	59.0647	1.006	0.493137	2.654	0.98569	92.8836	60.3445	1.57e-07	2.49e-07	9.21595	11.8772	1224.12	1417.37	352.862	481.75	92.76	75.7382	2.6712	3.03741
1020	Nd4Ga4O12	Pnma	62	orthorhombic	4.172	7.63266	-2.89	227.968	20	5.4268	5.46553	7.68595	90	90	90	23	20.5329	13.4	3.87814	3.6	2.33238	52.3926	50.4183	16.894	2.83763	1.764	0.341092	1.1633	0.201751	195.4	59.0647	1.006	0.493137	2.654	0.98569	92.8836	60.3445	1.57e-07	2.49e-07	9.21595	11.8772	1224.12	1417.37	352.862	481.75	92.76	75.7382	2.6712	3.03741
1021	Na2Nb2O6	P4/mbm	127	tetragonal	1.879	4.49848	-2.681	120.998	10	5.50945	5.50945	3.98622	90	90	90	15.2	12.9522	10.8	6.49307	2.8	1.16619	32.7789	30.1854	17.338	4.09524	1.802	0.346549	1.152	0.170458	191.2	50.4951	1.016	0.460678	2.568	1.08818	112.835	36.2489	4.02e-08	5.9e-08	38.8159	54.7405	1288.72	1909.29	657.054	1053.61	607.36	984.642	6.0132	10.4341
1022	Mg2Ge2O6	Cmcm	63	orthorhombic	3.098	5.31942	-2.242	90.4924	10	2.81282	4.85722	6.91986	90	90	73.169	13.6	9.32952	12.8	5.45527	2.6	0.8	28.9886	22.0615	15.942	1.74063	1.68	0.22987	1.082	0.219854	186	44.6363	0.904	0.32946	2.728	0.899675	108.373	54.8547	0.000100009	0.000199996	44.0159	62.4708	945.32	1181.58	459.76	504.288	92.76	75.7382	8.2332	12.2323
1024	Ca2C2O6	R-3c	167	trigonal	5.166	2.76688	-2.53	120.134	10	4.97047	4.97047	6.30572	90	113.211	60	10	5.05964	12.8	5.45527	2.4	0.8	20.0174	10.1486	16.714	6.65949	1.714	0.306046	1.044	0.374892	177.8	43.3793	0.882	0.43111	2.776	0.947895	109.415	54.0365	2.01e-06	4e-06	68.0159	85.4039	1265.52	1648.86	1015.88	1451.36	92.76	75.7382	25.2412	45.9924
1028	La2Ga2O6	R3c	161	trigonal	3.777	7.15323	-2.931	119.146	10	5.55336	5.55336	5.49371	59.6402	120.36	120	22.4	19.4587	12.8	5.03587	3.6	2.33238	51.3253	48.482	17.254	3.35137	1.772	0.355831	1.1424	0.194214	196	60.0799	1.018	0.514525	2.646	0.99803	101.954	47.8081	1.51e-07	2.38e-07	8.41595	11.453	1298.12	1532.61	332.062	441.064	92.76	75.7382	2.4912	2.78588
1029	Ca1Ge1O3	Pm-3m	221	cubic	1.084	5.08708	-2.428	52.4614	5	3.74352	3.74352	3.74352	90	90	90	15.2	9.6	12.8	5.45527	2.8	0.979796	32.1432	22.2927	18.382	4.1674	1.796	0.343895	1.138	0.189779	188.2	47.935	0.972	0.441017	2.668	0.996983	108.847	53.9185	0.000100007	0.000199997	52.0159	77.5522	1024.12	1219.34	498.16	543.858	92.76	75.7382	8.2012	12.2313
1030	Ca1Ge1O3	Pm-3m	221	cubic	0.962	5.03258	-2.428	53.0296	5	3.75698	3.75698	3.75698	90	90	90	15.2	9.6	12.8	5.45527	2.8	0.979796	32.1432	22.2927	18.382	4.1674	1.796	0.343895	1.138	0.189779	188.2	47.935	0.972	0.441017	2.668	0.996983	108.847	53.9185	0.000100007	0.000199997	52.0159	77.5522	1024.12	1219.34	498.16	543.858	92.76	75.7382	8.2012	12.2313
1031	Ac1Ce1O3	Pm-3m	221	cubic	1.439	7.17001	-2.864	96.1384	5	4.58106	4.58106	4.58106	90	90	90	34.2	33.5523	11	6.13188	4.6	3.2	83.0228	86.5627	19.064	2.16827	1.89	0.453431	1.224	0.072	204.2	66.4	1.154	0.63181	2.506	1.14395	103.884	46.342	1.48e-07	2.96e-07	4.61595	5.62969	1495.32	1721.02	511.08	564.615	92.76	75.7382	4.0332	5.38636
1033	Er1Lu1O3	Pm-3m	221	cubic	0.878	8.73119	-2.856	74.2147	5	4.20239	4.20239	4.20239	90	90	90	32.6	30.1437	15.8	0.979796	4.4	2.93939	78.0448	76.0289	17.664	0.429958	1.818	0.365316	1.1622	0.120131	198.4	59.4932	1.086	0.546319	2.566	1.07047	91.1476	61.9028	2.88e-07	3.64e-07	6.21595	7.58699	1417.32	1634.13	778.28	886.932	92.76	75.7382	8.5132	10.1763
1034	La2Al2O6	R-3c	167	trigonal	4.282	6.5142	-3.561	109.043	10	5.34902	5.34902	5.34902	60.3363	119.664	119.664	18.8	19.1979	12.8	5.03587	3.4	2.33238	42.777	48.252	16.894	3.95941	1.766	0.354378	1.1254	0.227764	194.6	59.3013	1.02	0.515364	2.606	1.03409	102.008	47.7393	1.28e-07	2.44e-07	49.6159	92.8281	1361.12	1585.34	458.174	500.801	92.76	75.7382	3.5132	4.27469
1035	Lu4Mn4O12	Pnma	62	orthorhombic	0.262	8.40018	-2.984	219.742	20	5.1993	5.7906	7.2987	90	90	90	24	24.4049	14.4	3.72022	3.6	2.33238	55.5806	61.5687	15.442	4.04927	1.77	0.312026	1.08587	0.240668	191.6	51.2664	0.99	0.451664	2.628	0.998427	91.1476	61.9028	4.04e-07	5.65e-07	4.77595	6.36857	1255.92	1489.36	721.68	826.787	92.76	75.7382	7.1732	8.95672
1036	Na4Br4O12	P2_13	198	cubic	4.519	3.46713	-0.915	289.071	20	6.61203	6.61203	6.61203	90	90	90	14	10.5641	13.2	6.11228	2.6	0.8	30.1784	25.0098	19.128	2.50774	1.736	0.296014	1.1645	0.146222	177.2	38.979	0.938	0.389482	2.842	0.973908	160.066	89.0344	2e+17	4e+17	28.0399	55.98	351.72	412.9	160.214	133.312	724.56	939.201	1.8132	2.19588
1038	Ho4Al4O12	Pnma	62	orthorhombic	6.09	7.88287	-3.594	202.15	20	5.16107	5.32555	7.35477	90	90	90	20.8	23.181	14.8	1.46969	3.4	2.33238	47.982	58.6286	16.164	3.128	1.74	0.306203	1.0992	0.228431	191.6	54.1502	0.99	0.462601	2.632	0.996863	92.938	60.2983	1.68e-07	3.23e-07	50.2159	92.5989	1211.12	1374.31	566.374	675.756	92.76	75.7382	5.6732	6.96724
1040	Gd4Ga4O12	Pnma	62	orthorhombic	4.106	8.13798	-2.953	224.429	20	5.30821	5.55797	7.60702	90	90	90	23.8	21.9854	14.2	2.4	3.6	2.33238	54.9942	55.1996	16.756	2.66613	1.754	0.322837	1.123	0.195131	192.2	53.7788	0.994	0.472	2.668	0.964353	92.8836	60.3445	2.9e-07	5.13e-07	8.01595	11.3201	1254.12	1463.38	410.462	595.079	92.76	75.7382	3.2512	3.96344
1041	Na4I4O12	Pnma	62	orthorhombic	3.658	4.58953	-1.204	286.398	20	5.72315	6.29322	7.95174	90	90	90	17.6	17.7381	13.2	6.11228	2.8	1.16619	39.5785	43.7468	20.316	3.67196	1.762	0.310252	1.24267	0.0416547	180.8	40.4297	0.976	0.418454	2.782	0.974031	154.189	78.3077	200000000000000	400000000000000	28.1057	55.9474	376.8	414.745	184.424	158.837	771.16	936.948	2.2052	2.92612
1043	Gd4Cr4O12	Pnma	62	orthorhombic	2.417	7.59666	-3.183	224.922	20	5.30355	5.56942	7.61475	90	90	90	22.4	21.7035	12.8	4.11825	3.6	2.33238	51.4489	54.7068	15.842	4.41694	1.792	0.344697	1.159	0.130859	194.8	55.9121	1.008	0.479767	2.638	0.9925	97.4456	57.0596	2.87e-07	5.14e-07	21.0159	36.7387	1347.52	1550.74	785.88	914.942	92.76	75.7382	6.2332	8.07631
1044	Dy4Cr4O12	Pnma	62	orthorhombic	2.396	7.87445	-3.202	221.416	20	5.25738	5.56052	7.57398	90	90	90	22.8	22.4713	13.2	3.91918	3.6	2.33238	52.4989	56.74	15.664	4.26515	1.786	0.335237	1.1702	0.125476	195.2	56.5169	1.004	0.473016	2.64	0.989626	97.4456	57.0596	2.11e-07	3.61e-07	21.0159	36.7387	1210.92	1372.99	804.88	932.164	92.76	75.7382	6.4532	8.1901
1045	Nd4Cr4O12	Pnma	62	orthorhombic	2.316	6.95757	-3.118	233.164	20	5.43018	5.55162	7.73442	90	90	90	21.6	20.1752	12	4.89898	3.6	2.33238	48.8473	49.6931	15.98	4.55034	1.802	0.360799	1.1993	0.129807	198	60.8769	1.02	0.50024	2.624	1.01283	97.4456	57.0596	1.54e-07	2.49e-07	22.2159	36.4891	1317.52	1509.26	728.28	870.823	92.76	75.7382	5.6532	7.88688
1046	La4Cr4O12	Pnma	62	orthorhombic	2.067	6.65522	-3.165	238.431	20	5.53124	5.52334	7.80438	90	90	90	21	19.0368	11.4	5.71314	3.6	2.33238	47.78	47.648	16.34	4.95411	1.81	0.373952	1.1784	0.123977	198.6	61.8372	1.032	0.521014	2.616	1.02461	106.516	42.6285	1.48e-07	2.38e-07	21.4159	36.6382	1391.52	1613.69	707.48	858.14	92.76	75.7382	5.4732	7.86204
1047	K4I4O12	P1	1	triclinic	2.548	4.17439	-1.233	340.512	20	7.59805	7.59454	7.59161	109.045	109.248	109.32	19.2	17.4287	13.2	6.11228	3	1.26491	42.8002	42.9932	24.748	11.0797	1.858	0.480267	1.31467	0.102796	185.4	48.537	1.056	0.548219	2.76	1.01595	153.293	79.4793	200000000000000	400000000000000	20.1057	39.9475	352	368.545	177.556	151.185	701.16	803.252	2.1512	2.92082
1048	Dy4Fe4O12	Pnma	62	orthorhombic	1.181	7.86458	-2.782	224.945	20	5.28396	5.59349	7.61085	90	90	90	23.2	22.5069	13.6	3.2	3.6	2.33238	53.2686	56.7541	15.636	4.32052	1.782	0.332048	1.1527	0.158197	195	56.3418	0.992	0.466064	2.674	0.957781	87.4994	65.657	2.05e-07	3.62e-07	18.2159	31.183	1248.92	1422.18	731.08	829.306	92.76	75.7382	5.1132	6.05101
1049	Ho4Fe4O12	Pnma	62	orthorhombic	1.213	7.99554	-2.789	223.279	20	5.26028	5.59094	7.59197	90	90	90	23.4	22.8876	13.8	3.1241	3.6	2.33238	53.7547	57.6902	15.582	4.27951	1.78	0.328877	1.1347	0.164631	195.4	56.9547	0.99	0.462601	2.676	0.954748	87.4994	65.657	1.83e-07	3.18e-07	19.2159	31.0153	1279.52	1457.3	741.88	841.85	92.76	75.7382	6.2932	7.50421
1050	Lu4Fe4O12	Pnma	62	orthorhombic	1.245	8.53764	-2.809	216.91	20	5.18806	5.53954	7.54748	90	90	90	24.2	24.4164	14.6	3.32265	3.6	2.33238	55.762	61.5679	15.39	4.15319	1.768	0.310252	1.1267	0.169878	191.4	51.0592	0.98	0.445421	2.684	0.94269	94.0614	57.7472	1.36e-07	2.25e-07	19.2159	31.0153	1415.92	1632.66	780.08	889.014	92.76	75.7382	7.2932	9.04029
1051	La4Er4O12	Pnma	62	orthorhombic	4.502	7.93646	-3.776	296.405	20	6.02995	5.83472	8.42464	90	90	90	29.8	26.9251	13	5.05964	4.4	2.93939	70.8325	67.7525	18.586	1.94913	1.856	0.413889	1.1964	0.0899102	205.4	68.1164	1.126	0.597649	2.532	1.11295	93.6556	59.7034	2.95e-07	3.7e-07	5.61595	6.8747	1430.92	1653.04	631.88	732.544	92.76	75.7382	5.3532	7.63301
1053	Ba4Mn4O12	P6_3/mmc	194	hexagonal	0.894	6.17131	-2.368	258.594	20	5.66228	5.66226	9.31338	90	90	120	21	18.6976	11.4	5.8515	3.2	1.6	48.0526	47.1159	19.518	10.0951	1.858	0.459408	1.18367	0.2821	199.6	63.4558	1.054	0.56248	2.552	1.10742	87.3764	65.794	3.56e-07	5.58e-07	5.17595	7.08364	949.52	1054.18	536.68	612.575	92.76	75.7382	4.3732	5.34347
1054	La4Fe4O12	Pnma	62	orthorhombic	0.821	6.6382	-2.753	242.893	20	5.54761	5.57808	7.84919	90	90	90	21.4	19.1165	11.8	5.38145	3.6	2.33238	48.5497	47.7409	16.312	5.00564	1.806	0.371354	1.1609	0.157922	198.4	61.6882	1.02	0.515364	2.65	0.994706	96.5694	55.2509	1.43e-07	2.39e-07	18.6159	31.1006	1429.52	1651.59	633.68	735.422	92.76	75.7382	4.1332	5.35931
1055	Gd4Fe4O12	Pnma	62	orthorhombic	1.061	7.58249	-2.766	228.714	20	5.61704	7.6514	5.32162	90	90	90	22.8	21.7476	13.2	3.48712	3.6	2.33238	52.2186	54.7362	15.814	4.47155	1.788	0.341667	1.1415	0.161289	194.6	55.7337	0.996	0.473016	2.672	0.96082	87.4994	65.657	2.82e-07	5.15e-07	18.2159	31.183	1385.52	1591.2	712.08	808.167	92.76	75.7382	4.8932	5.84587
1056	Nd4Fe4O12	Pnma	62	orthorhombic	1.087	6.92699	-2.705	237.884	20	5.45171	5.61312	7.77372	90	90	90	22	20.2386	12.4	4.45421	3.6	2.33238	49.617	49.7657	15.952	4.6042	1.798	0.358017	1.1818	0.164774	197.8	60.7236	1.008	0.494061	2.658	0.982291	87.4994	65.657	1.49e-07	2.5e-07	19.4159	30.9971	1355.52	1551.54	654.48	752.226	92.76	75.7382	4.3132	5.44021
1057	Er4Cr4O12	Pnma	62	orthorhombic	2.457	8.15139	-3.215	217.771	20	5.21545	5.54454	7.53083	90	90	90	23.2	23.2413	13.6	3.87814	3.6	2.33238	53.4507	58.5871	15.554	4.18375	1.782	0.329023	1.15	0.137695	194.8	55.9121	0.998	0.462964	2.644	0.983902	97.4456	57.0596	1.97e-07	3.35e-07	21.8159	36.555	1271.12	1447.67	829.28	956.043	92.76	75.7382	8.2132	9.78902
1060	Er4Fe4O12	Pnma	62	orthorhombic	1.241	8.12051	-2.795	221.748	20	5.23872	5.58038	7.58524	90	90	90	23.6	23.2689	14	3.09839	3.6	2.33238	54.2204	58.5882	15.526	4.23946	1.778	0.325724	1.1325	0.165937	194.6	55.7337	0.986	0.455702	2.678	0.951723	87.4994	65.657	1.92e-07	3.36e-07	19.0159	31.0386	1309.12	1492.87	755.48	858.159	92.76	75.7382	6.8732	8.3713
1061	Gd4Al4O12	Pnma	62	orthorhombic	5.399	7.48646	-3.568	206.04	20	5.30325	7.42389	5.23332	90	90	90	20.2	21.9854	14.2	2.4	3.4	2.33238	46.4459	55.5651	16.396	3.34588	1.748	0.320899	1.106	0.227099	190.8	52.8068	0.996	0.473016	2.628	1.0025	92.938	60.2983	2.67e-07	5.21e-07	49.2159	92.9892	1317.12	1520.34	536.574	624.987	92.76	75.7382	4.2732	4.96662
1063	La4Ga4O12	Imma	74	orthorhombic	3.669	7.22611	-2.928	235.888	20	5.54383	5.48077	7.76345	90	90	90	22.4	19.4587	12.8	5.03587	3.6	2.33238	51.3253	48.482	17.254	3.35137	1.772	0.355831	1.1424	0.194214	196	60.0799	1.018	0.514525	2.646	0.99803	101.954	47.8081	1.51e-07	2.38e-07	8.41595	11.453	1298.12	1532.61	332.062	441.064	92.76	75.7382	2.4912	2.78588
1066	Nd4Ga4O12	Pnma	62	orthorhombic	3.892	7.47992	-2.89	232.623	20	5.43802	5.52941	7.7363	90	90	90	23	20.5329	13.4	3.87814	3.6	2.33238	52.3926	50.4183	16.894	2.83763	1.764	0.341092	1.1633	0.201751	195.4	59.0647	1.006	0.493137	2.654	0.98569	92.8836	60.3445	1.57e-07	2.49e-07	9.21595	11.8772	1224.12	1417.37	352.862	481.75	92.76	75.7382	2.6712	3.03741
1067	La4Lu4O12	Pnma	62	orthorhombic	4.554	8.35871	-3.826	287.556	20	5.97753	8.31833	5.78315	90	90	90	30.4	27.7892	13.6	5.31413	4.4	2.93939	72.3741	69.9801	18.45	1.9767	1.846	0.403762	1.1906	0.10074	202.2	64.8827	1.12	0.59127	2.538	1.10603	100.218	50.0759	2.39e-07	2.93e-07	5.81595	7.15368	1537.72	1772.97	656.48	772.406	92.76	75.7382	5.7732	8.43728
1069	Er4Ni4O12	P2_1/c	14	monoclinic	0.424	8.79646	-2.423	206.858	20	5.12798	5.48699	7.3518	90	90.0999	90	24	23.3238	14.4	2.33238	3.6	2.33238	54.7901	58.6151	15.426	4.43849	1.764	0.315506	1.11	0.205329	193.8	55.0433	0.972	0.448705	2.696	0.936239	106.893	54.6491	1.86e-07	3.38e-07	21.2159	35.3707	1319.52	1505.67	738.88	838.15	92.76	75.7382	7.5532	9.01935
1070	Lu4Ni4O12	P2_1/c	14	monoclinic	0.588	9.27866	-2.44	201.626	20	5.06839	5.46469	7.27968	90	90.1355	90	24.6	24.4589	15	2.52982	3.6	2.33238	56.3317	61.5792	15.29	4.35304	1.754	0.299038	1.1042	0.2079	190.6	50.2538	0.966	0.438068	2.702	0.926939	113.455	41.9035	1.3e-07	2.27e-07	21.4159	35.3378	1426.32	1643.7	763.48	870.185	92.76	75.7382	7.9732	9.61383
1071	Cr4Bi4O12	Pnma	62	orthorhombic	1.563	8.67221	-1.959	236.648	20	5.60381	7.77437	5.43192	90	90	90	26.2	29.0682	13.8	3.91918	3.2	1.6	61.7949	74.9016	16.124	4.70278	1.738	0.267013	1.151	0.136836	195	56.2139	0.944	0.377656	2.8	0.792061	115.63	32.1634	2.85e-07	5.1e-07	20.4159	36.9214	1010.32	1180.03	577.76	823.255	92.76	75.7382	6.4132	8.16777
1073	Dy4Mn4O12	Pnma	62	orthorhombic	0.528	7.78461	-2.962	226.481	20	5.26037	5.81436	7.40481	90	90	90	23	22.4856	13.4	3.55528	3.6	2.33238	53.0872	56.747	15.688	4.21769	1.784	0.333623	1.11187	0.237091	195.2	56.5169	1.002	0.47178	2.618	1.01213	84.5856	69.0639	4.73e-07	6.02e-07	3.77595	4.7022	1088.92	1233.6	672.68	758.456	92.76	75.7382	4.9932	5.88112
1074	Fe4Bi4O12	Pnma	62	orthorhombic	1.277	8.56836	-1.554	242.5	20	5.47409	5.65108	7.83913	90	90	90	26.6	29.0489	14.2	3.1241	3.2	1.6	62.5647	74.8167	16.096	4.75577	1.734	0.262267	1.1335	0.16533	194.8	56.0371	0.932	0.366955	2.834	0.744623	105.684	49.5104	2.8e-07	5.11e-07	17.6159	31.3445	1048.32	1243.07	503.96	680.474	92.76	75.7382	5.0732	6.01184
1075	Ga4Bi4O12	Pcca	54	orthorhombic	2.146	7.86279	-1.794	275.984	20	5.42266	5.15949	9.86427	90	90	90	27.6	29.0971	15.2	1.16619	3.2	1.6	65.3403	74.7733	17.038	3.03307	1.7	0.229347	1.115	0.197737	192.4	54.1021	0.93	0.365294	2.83	0.75004	111.068	39.8255	2.88e-07	5.09e-07	7.41595	11.2252	916.92	1032.55	202.342	196.175	92.76	75.7382	3.4312	4.27411
1076	In4Bi4O12	Pnma	62	orthorhombic	2.612	8.93353	-1.619	276.434	20	6.01543	8.18042	5.61758	90	90	90	31.2	30.3803	15.2	1.16619	3.4	1.74356	74.3593	77.4305	17.83	1.84705	1.712	0.239282	1.151	0.136836	194.6	55.8627	0.968	0.402512	2.824	0.758251	108.55	44.2925	2.76e-07	5.13e-07	18.0159	32.1407	890.52	993.265	227.71	214.852	92.76	75.7382	2.9652	4.1382
1077	Cr4Bi4O12	C2/c	15	monoclinic	1.435	8.57283	-1.947	239.391	20	5.4974	5.4974	9.64399	105.928	105.928	59.9961	26.2	29.0682	13.8	3.91918	3.2	1.6	61.7949	74.9016	16.124	4.70278	1.738	0.267013	1.151	0.136836	195	56.2139	0.944	0.377656	2.8	0.792061	115.63	32.1634	2.85e-07	5.1e-07	20.4159	36.9214	1010.32	1180.03	577.76	823.255	92.76	75.7382	6.4132	8.16777
1078	Er4Mn4O12	Pnma	62	orthorhombic	0.41	8.04408	-2.973	223.105	20	5.22962	5.79172	7.36601	90	90	90	23.4	23.2517	13.8	3.48712	3.6	2.33238	54.039	58.5843	15.578	4.136	1.78	0.327353	1.09167	0.238896	194.8	55.9121	0.996	0.461675	2.622	1.00663	84.5856	69.0639	4.6e-07	5.92e-07	4.57595	6.01906	1149.12	1321.78	697.08	791.703	92.76	75.7382	6.7532	8.27489
1079	Ho4Mn4O12	Pnma	62	orthorhombic	0.535	7.9042	-2.968	225.097	20	5.24901	5.8061	7.38597	90	90	90	23.2	22.8683	13.6	3.49857	3.6	2.33238	53.5733	57.6847	15.634	4.17634	1.782	0.330478	1.09387	0.238368	195.6	57.1265	1	0.468402	2.62	1.00938	84.5856	69.0639	4.51e-07	5.87e-07	4.77595	6.36857	1119.52	1277.76	683.48	772.969	92.76	75.7382	6.1732	7.38709
1080	Lu4Mn4O12	Pnma	62	orthorhombic	0.557	8.45923	-2.984	218.209	20	5.18478	5.74252	7.32891	90	90	90	24	24.4049	14.4	3.72022	3.6	2.33238	55.5806	61.5687	15.442	4.04927	1.77	0.312026	1.08587	0.240668	191.6	51.2664	0.99	0.451664	2.628	0.998427	91.1476	61.9028	4.04e-07	5.65e-07	4.77595	6.36857	1255.92	1489.36	721.68	826.787	92.76	75.7382	7.1732	8.95672
1081	Cd4Ge4O12	Pnma	62	orthorhombic	1.336	7.4381	-1.584	208.111	20	5.25312	5.29794	7.47775	90	90	90	20.8	16.473	14.8	1.6	3	1.26491	46.6098	39.5433	15.742	1.99163	1.77	0.306985	1.128	0.190725	185.6	44.0572	0.904	0.32946	2.804	0.785483	108.373	54.8547	0.000100014	0.000199993	31.4159	40.1851	880.72	1165.7	394.004	458.999	92.76	75.7382	7.7532	12.2517
1082	Gd4Mn4O12	Pnma	62	orthorhombic	0.346	7.49994	-2.946	230.428	20	5.82775	7.47217	5.2916	90	90	90	22.6	21.7219	13	3.79473	3.6	2.33238	52.0372	54.7253	15.866	4.37016	1.79	0.343162	1.10067	0.237245	194.8	55.9121	1.006	0.478565	2.616	1.0149	84.5856	69.0639	5.5e-07	6.75e-07	3.77595	4.7022	1225.52	1440.42	653.68	733.772	92.76	75.7382	4.7732	5.66517
1083	Na4Nb4O12	Pmc2_1	26	orthorhombic	2.495	4.55453	-2.692	239.018	20	5.58258	7.77475	5.50692	90	90	90	15.2	12.9522	10.8	6.49307	2.8	1.16619	32.7789	30.1854	17.338	4.09524	1.802	0.346549	1.152	0.170458	191.2	50.4951	1.016	0.460678	2.568	1.08818	112.835	36.2489	4.02e-08	5.9e-08	38.8159	54.7405	1288.72	1909.29	657.054	1053.61	607.36	984.642	6.0132	10.4341
1084	La4In4O12	Pnma	62	orthorhombic	3	7.12998	-2.772	281.078	20	5.95791	8.2415	5.72436	90	90	90	26	22.1901	12.8	5.03587	3.8	2.4	60.3443	54.8428	18.046	2.25867	1.784	0.359922	1.1784	0.123977	198.2	61.5415	1.056	0.535373	2.64	1.00312	99.4356	51.1416	1.39e-07	2.4e-07	19.0159	31.8903	1271.72	1513.08	357.43	442.304	92.76	75.7382	2.0252	2.39618
1085	Nb4Cu4O12	C2/m	12	monoclinic	1.526	5.06118	-2.175	268.315	20	6.35043	6.35043	6.70402	91.5919	91.5919	83.2785	18.8	13.7608	12.8	4.35431	3	1.26491	40.8901	31.8673	14.004	4.27527	1.74	0.27828	1.084	0.215555	188.8	47.8598	0.94	0.382832	2.762	0.836144	126.094	20.6629	3.38e-08	5.95e-08	90.8159	155.999	1697.52	2050.7	854.434	1073.76	92.76	75.7382	8.1132	10.5913
1088	Ni4Bi4O12	P-1	2	triclinic	0.792	8.95418	-1.253	234.164	20	5.38664	5.65859	7.68972	91.9986	90.0912	91.5142	27	29.0517	14.6	2.33238	3.2	1.6	63.1344	74.7742	15.996	4.94556	1.72	0.246982	1.111	0.204949	194	55.3534	0.918	0.356112	2.852	0.720844	125.078	20.5334	2.74e-07	5.14e-07	19.8159	35.7257	1058.72	1260.57	487.36	648.655	92.76	75.7382	5.7532	7.06118
1089	Ho4Ga4O12	Pnma	62	orthorhombic	4.105	8.57185	-2.978	219.021	20	5.54205	7.5356	5.24442	90	90	90	24.4	23.0877	14.8	1.46969	3.6	2.33238	56.5303	58.0567	16.524	2.42172	1.746	0.308389	1.1162	0.197266	193	55.0781	0.988	0.461537	2.672	0.958319	92.8836	60.3445	1.91e-07	3.16e-07	9.01595	11.7522	1148.12	1305.92	440.262	653.967	92.76	75.7382	4.6512	6.51502
1094	Cr4Bi4O12	C2/c	15	monoclinic	1.326	8.58341	-1.947	239.096	20	5.49274	5.49274	9.64277	105.924	105.924	60.0554	26.2	29.0682	13.8	3.91918	3.2	1.6	61.7949	74.9016	16.124	4.70278	1.738	0.267013	1.151	0.136836	195	56.2139	0.944	0.377656	2.8	0.792061	115.63	32.1634	2.85e-07	5.1e-07	20.4159	36.9214	1010.32	1180.03	577.76	823.255	92.76	75.7382	6.4132	8.16777
1095	Ba4Mn4O12	P6_3/mmc	194	hexagonal	0.896	6.16882	-2.369	258.699	20	5.66257	5.66263	9.31602	90	90	120	21	18.6976	11.4	5.8515	3.2	1.6	48.0526	47.1159	19.518	10.0951	1.858	0.459408	1.18367	0.2821	199.6	63.4558	1.054	0.56248	2.552	1.10742	87.3764	65.794	3.56e-07	5.58e-07	5.17595	7.08364	949.52	1054.18	536.68	612.575	92.76	75.7382	4.3732	5.34347
1097	Mn4Bi4O12	C2/c	15	monoclinic	0.256	8.39706	-1.723	246.729	20	5.5335	5.5335	9.75411	91.3802	105.368	119.366	26.4	29.0558	14	3.52136	3.2	1.6	62.3833	74.8339	16.148	4.65742	1.736	0.26462	1.09267	0.238646	195	56.2139	0.942	0.375787	2.778	0.824291	102.77	54.9201	5.48e-07	6.73e-07	3.17595	3.85769	888.32	990.048	445.56	569.232	92.76	75.7382	4.9532	5.83998
1098	Mn4Bi4O12	C2	5	monoclinic	0.255	8.39383	-1.723	246.824	20	5.53505	5.53505	9.75257	105.328	91.4203	119.378	26.4	29.0558	14	3.52136	3.2	1.6	62.3833	74.8339	16.148	4.65742	1.736	0.26462	1.09267	0.238646	195	56.2139	0.942	0.375787	2.778	0.824291	102.77	54.9201	5.48e-07	6.73e-07	3.17595	3.85769	888.32	990.048	445.56	569.232	92.76	75.7382	4.9532	5.83998
1101	Ca4Cr4O12	Pnma	62	orthorhombic	0.541	4.27606	-2.612	217.579	20	5.31752	5.44898	7.50919	90	90	90	13.6	6.97424	11.2	6.01332	2.8	0.979796	28.0145	15.1903	17.102	6.00716	1.786	0.335237	1.172	0.124964	191.4	50.9886	0.992	0.453008	2.598	1.05152	97.9196	56.2522	3.22e-08	4.92e-08	58.8159	79.4222	994.32	1169.21	691.88	849.841	92.76	75.7382	5.9412	7.9604
1107	Nb4Ag4O12	Cmcm	63	orthorhombic	0.773	6.33216	-1.983	260.952	20	6.67649	6.67649	6.16983	90	90	71.5923	22.4	17.7381	12.8	4.35431	3.2	1.46969	49.7546	41.6113	14.636	3.3409	1.77	0.306985	1.13733	0.172284	191.8	51.2031	0.968	0.406664	2.768	0.830022	127.387	20.389	3.37e-08	5.95e-08	96.8159	167.898	1544.52	1959.4	829.866	1063.31	92.76	75.7382	7.7532	10.4453
1109	Nd4Fe4O12	Pnma	62	orthorhombic	1.087	6.96734	-2.702	236.507	20	5.56693	7.78608	5.45643	90	90	90	22	20.2386	12.4	4.45421	3.6	2.33238	49.617	49.7657	15.952	4.6042	1.798	0.358017	1.1818	0.164774	197.8	60.7236	1.008	0.494061	2.658	0.982291	87.4994	65.657	1.49e-07	2.5e-07	19.4159	30.9971	1355.52	1551.54	654.48	752.226	92.76	75.7382	4.3132	5.44021
1110	Dy4Mn4O12	Pnma	62	orthorhombic	0.524	7.77111	-2.963	226.875	20	5.80601	7.42298	5.26417	90	90	90	23	22.4856	13.4	3.55528	3.6	2.33238	53.0872	56.747	15.688	4.21769	1.784	0.333623	1.11187	0.237091	195.2	56.5169	1.002	0.47178	2.618	1.01213	84.5856	69.0639	4.73e-07	6.02e-07	3.77595	4.7022	1088.92	1233.6	672.68	758.456	92.76	75.7382	4.9932	5.88112
1112	Ho4Mn4O12	Pnma	62	orthorhombic	0.403	7.91429	-2.968	224.81	20	5.79407	7.40735	5.23804	90	90	90	23.2	22.8683	13.6	3.49857	3.6	2.33238	53.5733	57.6847	15.634	4.17634	1.782	0.330478	1.09387	0.238368	195.6	57.1265	1	0.468402	2.62	1.00938	84.5856	69.0639	4.51e-07	5.87e-07	4.77595	6.36857	1119.52	1277.76	683.48	772.969	92.76	75.7382	6.1732	7.38709
1114	La4Mn4O12	P2_1/c	14	monoclinic	1.206	5.59686	-2.585	287.009	20	5.29812	10.3637	5.93506	90	61.7285	90	21.2	19.0725	11.6	5.53534	3.6	2.33238	48.3683	47.7145	16.364	4.91001	1.808	0.372634	1.12007	0.238316	198.6	61.8372	1.03	0.52	2.594	1.04586	93.6556	59.7034	4.11e-07	5.67e-07	4.17595	5.34134	1269.52	1511.53	575.28	645.737	92.76	75.7382	4.0132	5.14391
1115	Nd1Fe1O3	P4mm	99	tetragonal	0.551	6.97152	-2.573	59.0912	5	3.80712	3.80712	4.07689	90	90	90	22	20.2386	12.4	4.45421	3.6	2.33238	49.617	49.7657	15.952	4.6042	1.798	0.358017	1.1818	0.164774	197.8	60.7236	1.008	0.494061	2.658	0.982291	87.4994	65.657	1.49e-07	2.5e-07	19.4159	30.9971	1355.52	1551.54	654.48	752.226	92.76	75.7382	4.3132	5.44021
1116	Ac1Al1O3	P4mm	99	tetragonal	4.209	8.7982	-3.528	56.9945	5	3.82946	3.82946	3.88648	90	90	90	25.2	31.9587	12.8	5.03587	3.6	2.72764	60.3959	83.4105	16.926	4.0041	1.774	0.36941	1.143	0.234	191.6	54.1502	1.034	0.540503	2.604	1.03701	99.692	50.6255	5.4e-09	1.08e-08	49.4159	92.9078	1327.12	1534.91	484.174	540.108	92.76	75.7382	5.0732	6.03243
1117	Nd1Fe1O3	P4mm	99	tetragonal	0.739	6.7931	-2.573	60.6432	5	3.84642	3.84642	4.09891	90	90	90	22	20.2386	12.4	4.45421	3.6	2.33238	49.617	49.7657	15.952	4.6042	1.798	0.358017	1.1818	0.164774	197.8	60.7236	1.008	0.494061	2.658	0.982291	87.4994	65.657	1.49e-07	2.5e-07	19.4159	30.9971	1355.52	1551.54	654.48	752.226	92.76	75.7382	4.3132	5.44021
1118	Gd1Al1O3	P4mm	99	tetragonal	3.244	7.83126	-3.476	49.2419	5	3.64822	3.64822	3.69976	90	90	90	20.2	21.9854	14.2	2.4	3.4	2.33238	46.4459	55.5651	16.396	3.34588	1.748	0.320899	1.106	0.227099	190.8	52.8068	0.996	0.473016	2.628	1.0025	92.938	60.2983	2.67e-07	5.21e-07	49.2159	92.9892	1317.12	1520.34	536.574	624.987	92.76	75.7382	4.2732	4.96662
1119	K1Nb1O3	P4mm	99	tetragonal	1.696	4.43385	-2.697	67.4136	5	4.01616	4.01616	4.1795	90	90	90	16.8	12.8281	10.8	6.49307	3	1.26491	36.0006	29.8262	21.77	12.3468	1.898	0.496806	1.224	0.225708	195.8	56.3503	1.096	0.575555	2.546	1.12167	111.939	37.7453	4.54e-08	6.07e-08	30.8159	40.4175	1263.92	1911.66	650.186	1055.56	537.36	844.944	5.9592	10.4523
1120	Nd1Ga1O3	P4mm	99	tetragonal	3.765	7.44658	-2.782	58.4161	5	3.82282	3.82282	3.99729	90	90	90	23	20.5329	13.4	3.87814	3.6	2.33238	52.3926	50.4183	16.894	2.83763	1.764	0.341092	1.1633	0.201751	195.4	59.0647	1.006	0.493137	2.654	0.98569	92.8836	60.3445	1.57e-07	2.49e-07	9.21595	11.8772	1224.12	1417.37	352.862	481.75	92.76	75.7382	2.6712	3.03741
1121	Na1Nb1O3	P4mm	99	tetragonal	1.755	4.3356	-2.675	62.7717	5	3.92648	3.92648	4.07152	90	90	90	15.2	12.9522	10.8	6.49307	2.8	1.16619	32.7789	30.1854	17.338	4.09524	1.802	0.346549	1.152	0.170458	191.2	50.4951	1.016	0.460678	2.568	1.08818	112.835	36.2489	4.02e-08	5.9e-08	38.8159	54.7405	1288.72	1909.29	657.054	1053.61	607.36	984.642	6.0132	10.4341
1122	Gd1Al1O3	P4mm	99	tetragonal	3.16	7.6759	-3.476	50.2386	5	3.68651	3.68651	3.69664	90	90	90	20.2	21.9854	14.2	2.4	3.4	2.33238	46.4459	55.5651	16.396	3.34588	1.748	0.320899	1.106	0.227099	190.8	52.8068	0.996	0.473016	2.628	1.0025	92.938	60.2983	2.67e-07	5.21e-07	49.2159	92.9892	1317.12	1520.34	536.574	624.987	92.76	75.7382	4.2732	4.96662
1124	Eu1Ge1O3	P4mm	99	tetragonal	1.195	8.61532	-2.691	52.5421	5	3.74591	3.74591	3.74448	90	90	90	23.8	21.6924	14.2	2.71293	3.6	2.33238	54.5204	53.4325	18.936	5.22085	1.804	0.356011	1.1497	0.191338	192.4	54.6648	0.99	0.472694	2.704	0.937968	125.046	22.5214	0.00010018	0.00019991	14.8159	23.2312	1032.72	1224.62	494.96	540.254	92.76	75.7382	8.3332	12.2378
1125	K1Nb1O3	P4mm	99	tetragonal	1.714	4.48389	-2.697	66.6613	5	4.00255	4.00255	4.16102	90	90	90	16.8	12.8281	10.8	6.49307	3	1.26491	36.0006	29.8262	21.77	12.3468	1.898	0.496806	1.224	0.225708	195.8	56.3503	1.096	0.575555	2.546	1.12167	111.939	37.7453	4.54e-08	6.07e-08	30.8159	40.4175	1263.92	1911.66	650.186	1055.56	537.36	844.944	5.9592	10.4523
1126	Nd1Cr1O3	P4mm	99	tetragonal	1.874	7.28698	-2.973	55.6559	5	3.81268	3.81268	3.82871	90	90	90	21.6	20.1752	12	4.89898	3.6	2.33238	48.8473	49.6931	15.98	4.55034	1.802	0.360799	1.1993	0.129807	198	60.8769	1.02	0.50024	2.624	1.01283	97.4456	57.0596	1.54e-07	2.49e-07	22.2159	36.4891	1317.52	1509.26	728.28	870.823	92.76	75.7382	5.6532	7.88688
1127	Eu1Hf1O3	P4mm	99	tetragonal	3.915	9.33419	-3.764	67.3261	5	4.0227	4.0227	4.16053	90	90	90	31.8	29.2875	12.2	4.91528	4	2.52982	75.6904	73.586	18.898	5.25987	1.828	0.379125	1.1657	0.159637	197.2	58.5812	1.078	0.539793	2.566	1.07122	101.528	54.834	2.48e-07	3.52e-07	7.41595	9.48705	1389.32	1864.87	753.88	964.901	92.76	75.7382	7.0732	9.84771
1128	Nd1Al1O3	P4mm	99	tetragonal	3.134	6.93483	-3.484	52.4924	5	3.73997	3.73997	3.75285	90	90	90	19.4	20.3922	13.4	3.87814	3.4	2.33238	43.8443	50.3787	16.534	3.49832	1.758	0.339435	1.1463	0.235737	194	58.258	1.008	0.494061	2.614	1.0225	92.938	60.2983	1.34e-07	2.55e-07	50.4159	92.5258	1287.12	1477.39	478.974	532.072	92.76	75.7382	3.6932	4.40112
1129	Lu1Al1O3	P4mm	99	tetragonal	0.456	8.34619	-3.403	49.7288	5	3.62715	3.62715	3.77988	90	90	90	21.6	24.7758	15.6	1.35647	3.4	2.33238	49.9893	62.6334	15.972	2.99043	1.728	0.284422	1.0912	0.231015	187.6	47.5924	0.98	0.445421	2.64	0.985677	99.5	50.8763	1.21e-07	2.3e-07	50.2159	92.5989	1347.52	1565.01	604.574	742.759	92.76	75.7382	6.6732	8.67156
1130	Ac1Fe1O3	P4mm	99	tetragonal	0.61	8.79477	-2.705	62.4664	5	3.96505	3.96505	3.97329	90	90	90	27.8	31.3841	11.8	5.38145	3.8	2.71293	66.1686	81.883	16.344	5.04475	1.814	0.384895	1.1785	0.163	195.4	56.9547	1.034	0.540503	2.648	0.997826	94.2534	57.5445	2e-08	4e-08	18.4159	31.1393	1395.52	1604.7	659.68	756.726	92.76	75.7382	5.6932	6.70112
1132	Ga1Bi1O3	P4mm	99	tetragonal	2.053	8.59959	-1.759	63.0845	5	3.68657	3.68657	4.6417	90	90	90	27.6	29.0971	15.2	1.16619	3.2	1.6	65.3403	74.7733	17.038	3.03307	1.7	0.229347	1.115	0.197737	192.4	54.1021	0.93	0.365294	2.83	0.75004	111.068	39.8255	2.88e-07	5.09e-07	7.41595	11.2252	916.92	1032.55	202.342	196.175	92.76	75.7382	3.4312	4.27411
1135	Ac1Ga1O3	P4/mmm	123	tetragonal	3.327	9.36238	-2.901	61.1407	5	3.93527	3.93527	3.94803	90	90	90	28.8	31.3904	12.8	5.03587	3.8	2.71293	68.9442	81.7211	17.286	3.40066	1.78	0.370675	1.16	0.2	193	55.0781	1.032	0.539756	2.644	1.00113	99.6376	50.6878	2.8e-08	5.6e-08	8.21595	11.3797	1264.12	1478.94	358.062	491.945	92.76	75.7382	4.0512	5.39138
1136	Ca1Hf1O3	P4mm	99	tetragonal	3.983	6.51298	-3.552	67.9633	5	4.0305	4.0305	4.18367	90	90	90	23.2	24.8387	10.8	6.4	3.2	1.6	53.3132	63.2793	18.344	4.21119	1.82	0.368293	1.154	0.158947	193	52.7409	1.06	0.515364	2.53	1.11882	85.3298	68.1532	7.48e-08	1.33e-07	44.6159	78.1999	1380.72	1863.06	757.08	966.066	92.76	75.7382	6.9412	9.82271
1137	Gd1Fe1O3	P4mm	99	tetragonal	0.939	7.05408	-2.594	61.4616	5	3.74738	3.74738	4.37671	90	90	90	22.8	21.7476	13.2	3.48712	3.6	2.33238	52.2186	54.7362	15.814	4.47155	1.788	0.341667	1.1415	0.161289	194.6	55.7337	0.996	0.473016	2.672	0.96082	87.4994	65.657	2.82e-07	5.15e-07	18.2159	31.183	1385.52	1591.2	712.08	808.167	92.76	75.7382	4.8932	5.84587
1138	Ce1Fe1O3	P4/mmm	123	tetragonal	0.338	7.14906	-2.565	56.6653	5	3.8344	3.8344	3.8541	90	90	90	21.6	19.4895	12	5.05964	3.6	2.33238	48.7918	48.1993	15.972	4.62448	1.804	0.368	1.1425	0.160888	196.4	58.5068	1	0.48	2.654	0.988486	100.043	52.3934	1.68e-07	2.89e-07	18.2159	31.183	1407.52	1621.08	608.68	717.899	92.76	75.7382	3.9932	5.31243
1143	Hf1Cd1O3	P4mm	99	tetragonal	0.442	8.26061	-2.588	68.1252	5	4.04219	4.04219	4.16941	90	90	90	28.8	26.5812	12.8	4.66476	3.4	1.74356	67.7798	66.7717	15.704	2.03294	1.794	0.335952	1.144	0.161071	190.4	49.4959	0.992	0.43774	2.666	0.955146	84.8558	68.7343	8.2e-08	1.32e-07	24.0159	37.5611	1237.32	1856.16	652.924	949.799	92.76	75.7382	6.4932	9.7906
1144	Nb1Ag1O3	P4mm	99	tetragonal	1.586	6.49693	-1.996	63.5834	5	3.95286	3.95286	4.06932	90	90	90	22.4	17.7381	12.8	4.35431	3.2	1.46969	49.7546	41.6113	14.636	3.3409	1.77	0.306985	1.13733	0.172284	191.8	51.2031	0.968	0.406664	2.768	0.830022	127.387	20.389	3.37e-08	5.95e-08	96.8159	167.898	1544.52	1959.4	829.866	1063.31	92.76	75.7382	7.7532	10.4453
1145	Ac1In1O3	P4mm	99	tetragonal	2.615	8.63088	-2.607	74.9987	5	4.15305	4.15305	4.34829	90	90	90	32.4	32.4506	12.8	5.03587	4	2.75681	77.9632	83.772	18.078	2.32028	1.792	0.374347	1.196	0.128	195.2	56.7852	1.07	0.558713	2.638	1.00619	97.1196	53.735	1.6e-08	3.2e-08	18.8159	31.9306	1237.72	1458.08	383.43	491.717	92.76	75.7382	3.5852	5.33867
1146	Nd1Cr1O3	P4mm	99	tetragonal	1.816	7.069	-2.973	57.3722	5	3.85431	3.85431	3.86196	90	90	90	21.6	20.1752	12	4.89898	3.6	2.33238	48.8473	49.6931	15.98	4.55034	1.802	0.360799	1.1993	0.129807	198	60.8769	1.02	0.50024	2.624	1.01283	97.4456	57.0596	1.54e-07	2.49e-07	22.2159	36.4891	1317.52	1509.26	728.28	870.823	92.76	75.7382	5.6532	7.88688
1147	Gd1Cr1O3	P4mm	99	tetragonal	2.068	7.46022	-2.959	57.259	5	3.81749	3.81749	3.92905	90	90	90	22.4	21.7035	12.8	4.11825	3.6	2.33238	51.4489	54.7068	15.842	4.41694	1.792	0.344697	1.159	0.130859	194.8	55.9121	1.008	0.479767	2.638	0.9925	97.4456	57.0596	2.87e-07	5.14e-07	21.0159	36.7387	1347.52	1550.74	785.88	914.942	92.76	75.7382	6.2332	8.07631
1149	Ac1As1O3	P4mm	99	tetragonal	0.315	8.004	-2.325	72.5956	5	4.13272	4.13272	4.25048	90	90	90	29.2	31.4286	13.2	5.11468	3.8	2.71293	69.984	81.7575	17.516	3.04179	1.776	0.369789	1.14	0.24	184.2	51.5457	1.026	0.537684	2.718	0.949071	106.854	44.0267	6.6e-08	1.32e-07	12.4159	19.3557	946.12	1349.21	515.48	569.006	432.76	636.443	8.4732	10.9951
1151	Ac1Er1O3	P4mm	99	tetragonal	3.104	9.03444	-3.603	81.2874	5	4.15355	4.15355	4.71177	90	90	90	36.2	35.1704	13	5.05964	4.6	3.2	88.4514	90.724	18.618	2.01163	1.864	0.42514	1.214	0.092	202.4	64.1891	1.14	0.617058	2.53	1.11553	91.3396	61.7228	1.72e-07	3.44e-07	5.41595	6.66843	1396.92	1606.22	657.88	753.991	92.76	75.7382	6.9132	8.40472
1152	Gd1Ga1O3	P4mm	99	tetragonal	3.77	7.72387	-2.805	59.1155	5	3.68394	3.68394	4.35588	90	90	90	23.8	21.9854	14.2	2.4	3.6	2.33238	54.9942	55.1996	16.756	2.66613	1.754	0.322837	1.123	0.195131	192.2	53.7788	0.994	0.472	2.668	0.964353	92.8836	60.3445	2.9e-07	5.13e-07	8.01595	11.3201	1254.12	1463.38	410.462	595.079	92.76	75.7382	3.2512	3.96344
1154	Cr1Bi1O3	P4mm	99	tetragonal	0.995	8.88598	-1.874	57.7387	5	3.82347	3.82347	3.94959	90	90	90	26.2	29.0682	13.8	3.91918	3.2	1.6	61.7949	74.9016	16.124	4.70278	1.738	0.267013	1.151	0.136836	195	56.2139	0.944	0.377656	2.8	0.792061	115.63	32.1634	2.85e-07	5.1e-07	20.4159	36.9214	1010.32	1180.03	577.76	823.255	92.76	75.7382	6.4132	8.16777
1155	Er1Al1O3	P4mm	99	tetragonal	4.288	7.30524	-3.46	55.0628	5	3.53215	3.53215	4.41347	90	90	90	21	23.5797	15	1.26491	3.4	2.33238	48.4477	59.5577	16.108	3.08357	1.738	0.302549	1.097	0.229033	190.8	52.8068	0.986	0.455702	2.634	0.994054	92.938	60.2983	1.77e-07	3.41e-07	50.0159	92.6736	1240.72	1413.41	579.974	699.39	92.76	75.7382	6.2532	7.93896
1156	Ce1Fe1O3	P4/mmm	123	tetragonal	0.341	6.82643	-2.565	59.3434	5	3.89629	3.89629	3.90904	90	90	90	21.6	19.4895	12	5.05964	3.6	2.33238	48.7918	48.1993	15.972	4.62448	1.804	0.368	1.1425	0.160888	196.4	58.5068	1	0.48	2.654	0.988486	100.043	52.3934	1.68e-07	2.89e-07	18.2159	31.183	1407.52	1621.08	608.68	717.899	92.76	75.7382	3.9932	5.31243
1157	Cd1Ge1O3	P4mm	99	tetragonal	0.407	7.3681	-1.402	52.522	5	3.73723	3.73723	3.76046	90	90	90	20.8	16.473	14.8	1.6	3	1.26491	46.6098	39.5433	15.742	1.99163	1.77	0.306985	1.128	0.190725	185.6	44.0572	0.904	0.32946	2.804	0.785483	108.373	54.8547	0.000100014	0.000199993	31.4159	40.1851	880.72	1165.7	394.004	458.999	92.76	75.7382	7.7532	12.2517
1158	Fe1Bi1O3	P4mm	99	tetragonal	1.127	8.00495	-1.549	64.8918	5	3.75379	3.75379	4.60522	90	90	90	26.6	29.0489	14.2	3.1241	3.2	1.6	62.5647	74.8167	16.096	4.75577	1.734	0.262267	1.1335	0.16533	194.8	56.0371	0.932	0.366955	2.834	0.744623	105.684	49.5104	2.8e-07	5.11e-07	17.6159	31.3445	1048.32	1243.07	503.96	680.474	92.76	75.7382	5.0732	6.01184
1159	La1Fe1O3	P4/mmm	123	tetragonal	0.269	7.11259	-2.653	56.6732	5	3.83595	3.83595	3.85152	90	90	90	21.4	19.1165	11.8	5.38145	3.6	2.33238	48.5497	47.7409	16.312	5.00564	1.806	0.371354	1.1609	0.157922	198.4	61.6882	1.02	0.515364	2.65	0.994706	96.5694	55.2509	1.43e-07	2.39e-07	18.6159	31.1006	1429.52	1651.59	633.68	735.422	92.76	75.7382	4.1332	5.35931
1160	Ce1Al1O3	P4/mmm	123	tetragonal	2.971	6.63323	-3.468	53.8463	5	3.77259	3.77259	3.78335	90	90	90	19	19.5959	13	4.64758	3.4	2.33238	43.0191	48.7344	16.554	3.52166	1.764	0.350634	1.107	0.226971	192.6	55.8484	1	0.48	2.61	1.02828	105.482	43.9734	1.53e-07	2.93e-07	49.2159	92.9892	1339.12	1552.56	433.174	465.36	92.76	75.7382	3.3732	4.19513
1162	Ac1Ho1O3	P4mm	99	tetragonal	3.058	8.8214	-3.588	82.8121	5	4.14328	4.14328	4.82398	90	90	90	36	34.9914	12.8	5.03587	4.6	3.2	87.9857	90.3233	18.674	2.01035	1.866	0.427158	1.2162	0.0876	203.2	65.1564	1.144	0.62118	2.528	1.11784	91.3396	61.7228	1.63e-07	3.26e-07	5.61595	6.96143	1367.32	1574.86	644.28	733.568	92.76	75.7382	6.3332	7.54454
1163	Cs1Nb1O3	P4mm	99	tetragonal	1.792	5.3659	-2.601	84.7336	5	3.94991	3.94991	5.43101	90	90	90	24	20.0898	10.8	6.49307	3.4	1.74356	54.762	49.1305	26.77	22.2293	2.034	0.743333	1.282	0.314223	210.8	79.946	1.172	0.701267	2.54	1.13093	111.363	38.7201	7.24e-08	9.05e-08	18.0159	22.7558	1246.32	1914.12	643.198	1057.73	480.36	731.275	5.9112	10.4694
1167	Al1Bi1O3	P4/mmm	123	tetragonal	1.817	8.89192	-2.264	53.0287	5	3.75098	3.75098	3.76895	90	90	90	24	29.5635	15.2	1.16619	3	1.54919	56.792	76.213	16.678	3.67278	1.694	0.225175	1.098	0.228749	191	53.1413	0.932	0.366955	2.79	0.806573	111.123	39.7305	2.65e-07	5.17e-07	48.6159	93.2432	979.92	1130.75	328.454	357.026	92.76	75.7382	4.4532	5.18253
1168	Nb1Cu1O3	P4mm	99	tetragonal	0.467	5.32457	-2.008	63.7607	5	3.99343	3.99343	3.99817	90	90	90	18.8	13.7608	12.8	4.35431	3	1.26491	40.8901	31.8673	14.004	4.27527	1.74	0.27828	1.084	0.215555	188.8	47.8598	0.94	0.382832	2.762	0.836144	126.094	20.6629	3.38e-08	5.95e-08	90.8159	155.999	1697.52	2050.7	854.434	1073.76	92.76	75.7382	8.1132	10.5913
1169	Ac1Lu1O3	P4mm	99	tetragonal	3.541	9.62558	-3.662	77.6249	5	4.16422	4.16422	4.47644	90	90	90	36.8	35.729	13.6	5.31413	4.6	3.2	89.993	92.105	18.482	2.04049	1.854	0.41548	1.2082	0.1036	199.2	60.5884	1.134	0.611019	2.536	1.10863	97.9016	52.756	1.16e-07	2.32e-07	5.61595	6.96143	1503.72	1731.5	682.48	791.968	92.76	75.7382	7.3332	9.06939
1171	La1Cr1O3	P4mm	99	tetragonal	1.8	6.77311	-3.079	58.5702	5	3.88151	3.88151	3.88755	90	90	90	21	19.0368	11.4	5.71314	3.6	2.33238	47.78	47.648	16.34	4.95411	1.81	0.373952	1.1784	0.123977	198.6	61.8372	1.032	0.521014	2.616	1.02461	106.516	42.6285	1.48e-07	2.38e-07	21.4159	36.6382	1391.52	1613.69	707.48	858.14	92.76	75.7382	5.4732	7.86204
1174	Cr1Bi1O3	P4mm	99	tetragonal	0.585	8.56238	-1.874	59.9208	5	3.86631	3.86631	4.00852	90	90	90	26.2	29.0682	13.8	3.91918	3.2	1.6	61.7949	74.9016	16.124	4.70278	1.738	0.267013	1.151	0.136836	195	56.2139	0.944	0.377656	2.8	0.792061	115.63	32.1634	2.85e-07	5.1e-07	20.4159	36.9214	1010.32	1180.03	577.76	823.255	92.76	75.7382	6.4132	8.16777
1175	Dy1Al1O3	P4mm	99	tetragonal	3.63	7.80951	-3.464	50.4954	5	3.67218	3.67218	3.74459	90	90	90	20.6	22.7824	14.6	1.74356	3.4	2.33238	47.4959	57.6591	16.218	3.174	1.742	0.309864	1.1172	0.226675	191.2	53.4767	0.992	0.466064	2.63	0.99968	92.938	60.2983	1.91e-07	3.68e-07	49.2159	92.9892	1180.52	1335.45	555.574	657.185	92.76	75.7382	4.4932	5.23266
1176	Nb1Ga1O3	P4mm	99	tetragonal	0.296	5.33368	-2.186	65.5749	5	3.96335	3.96335	4.17458	90	90	90	19.2	14.0769	13.2	4.26146	3	1.26491	42.1255	32.8269	14.942	2.97728	1.722	0.266113	1.072	0.231032	187.6	46.6716	0.942	0.384312	2.744	0.855257	110.56	40.0948	5.84e-08	7.16e-08	16.6159	21.8016	1552.92	1963.28	643.462	1057.64	92.76	75.7382	6.6112	10.3063
1179	La1Al1O3	P4mm	99	tetragonal	3.332	6.61519	-3.546	53.6892	5	3.73403	3.73403	3.85062	90	90	90	18.8	19.1979	12.8	5.03587	3.4	2.33238	42.777	48.252	16.894	3.95941	1.766	0.354378	1.1254	0.227764	194.6	59.3013	1.02	0.515364	2.606	1.03409	102.008	47.7393	1.28e-07	2.44e-07	49.6159	92.8281	1361.12	1585.34	458.174	500.801	92.76	75.7382	3.5132	4.27469
1182	Ca1Ge1O3	Pm-3m	221	cubic	1.204	5.08528	-2.424	52.48	5	3.7424	3.7424	3.74708	90	90	90	15.2	9.6	12.8	5.45527	2.8	0.979796	32.1432	22.2927	18.382	4.1674	1.796	0.343895	1.138	0.189779	188.2	47.935	0.972	0.441017	2.668	0.996983	108.847	53.9185	0.000100007	0.000199997	52.0159	77.5522	1024.12	1219.34	498.16	543.858	92.76	75.7382	8.2012	12.2313
1183	Ho1Al1O3	P4mm	99	tetragonal	4.082	7.8483	-3.456	50.76	5	3.66467	3.66467	3.77966	90	90	90	20.8	23.181	14.8	1.46969	3.4	2.33238	47.982	58.6286	16.164	3.128	1.74	0.306203	1.0992	0.228431	191.6	54.1502	0.99	0.462601	2.632	0.996863	92.938	60.2983	1.68e-07	3.23e-07	50.2159	92.5989	1211.12	1374.31	566.374	675.756	92.76	75.7382	5.6732	6.96724
1184	Ac1Cr1O3	P4/mmm	123	tetragonal	1.502	8.63402	-3.119	62.8892	5	3.99451	3.99451	3.94139	90	90	90	27.4	31.4172	11.4	5.71314	3.8	2.71293	65.3989	81.9945	16.372	4.99344	1.818	0.387319	1.196	0.128	195.6	57.1265	1.046	0.545586	2.614	1.02757	104.2	46.0648	2.54e-08	5.08e-08	21.2159	36.6863	1357.52	1564.84	733.48	874.274	92.76	75.7382	7.0332	8.59149
1185	Ac1Cr1O3	Pm-3m	221	cubic	1.671	8.77161	-3.119	61.9028	5	3.95762	3.95762	3.95223	90	90	90	27.4	31.4172	11.4	5.71314	3.8	2.71293	65.3989	81.9945	16.372	4.99344	1.818	0.387319	1.196	0.128	195.6	57.1265	1.046	0.545586	2.614	1.02757	104.2	46.0648	2.54e-08	5.08e-08	21.2159	36.6863	1357.52	1564.84	733.48	874.274	92.76	75.7382	7.0332	8.59149
1188	Ce1Cr1O3	P4mm	99	tetragonal	1.815	6.56366	-2.993	60.7454	5	3.92081	3.92081	3.95149	90	90	90	21.2	19.4155	11.6	5.42586	3.6	2.33238	48.0221	48.1112	16	4.57073	1.808	0.370643	1.16	0.130231	196.6	58.6706	1.012	0.486555	2.62	1.01871	109.99	37.9537	1.73e-07	2.88e-07	21.0159	36.7387	1369.52	1581.92	682.48	845.357	92.76	75.7382	5.3332	7.85408
1189	Ce1Cr1O3	P4mm	99	tetragonal	1.747	6.71122	-2.993	59.4098	5	3.8945	3.8945	3.91701	90	90	90	21.2	19.4155	11.6	5.42586	3.6	2.33238	48.0221	48.1112	16	4.57073	1.808	0.370643	1.16	0.130231	196.6	58.6706	1.012	0.486555	2.62	1.01871	109.99	37.9537	1.73e-07	2.88e-07	21.0159	36.7387	1369.52	1581.92	682.48	845.357	92.76	75.7382	5.3332	7.85408
1190	Al2Bi2O6	R-3	148	trigonal	2.668	6.10051	-2.305	154.586	10	5.78349	5.78349	6.2951	62.6539	62.6539	60	24	29.5635	15.2	1.16619	3	1.54919	56.792	76.213	16.678	3.67278	1.694	0.225175	1.098	0.228749	191	53.1413	0.932	0.366955	2.79	0.806573	111.123	39.7305	2.65e-07	5.17e-07	48.6159	93.2432	979.92	1130.75	328.454	357.026	92.76	75.7382	4.4532	5.18253
1191	Mn2Cd2O6	R-3	148	trigonal	1.488	6.27013	-1.595	114.062	10	5.17956	5.17956	5.74843	63.2229	63.2229	60	19.4	15.7429	13.4	3.55528	3	1.26491	43.0694	37.8087	14.486	3.94741	1.758	0.294374	1.10367	0.236996	188.8	47.5369	0.922	0.347125	2.712	0.892713	84.5856	69.0639	3.02e-07	5.7e-07	20.9759	38.1311	728.92	882.83	455.524	571.307	92.76	75.7382	4.0332	5.15256
1192	Ca2Co2O6	R-3	148	trigonal	0.328	3.24845	-1.782	150.296	10	5.72949	5.72949	6.23632	62.6539	62.6539	60	14.2	7.90949	11.8	5.6	2.8	0.979796	29.4019	17.464	16.99	6.19253	1.774	0.326166	1.13767	0.190425	190.4	49.9664	0.968	0.439017	2.642	1.01533	97.8342	56.3035	1.88e-08	2.44e-08	60.0159	79.988	1045.52	1255.86	609.48	710.032	92.76	75.7382	5.0812	6.42536
1194	Nb2Hg2O6	R-3	148	trigonal	0.296	7.66405	-1.953	147.98	10	5.47308	5.47308	6.52113	65.188	65.188	60	29	28.5237	13	4.28952	3.4	1.74356	68.2989	72.5426	15.4	2.6125	1.794	0.335952	1.169	0.174597	190.6	49.806	0.96	0.399199	2.782	0.816245	102.262	55.0391	2.22e-07	3.73e-07	12.4759	21.0078	1183.5	1928.11	629.744	1062.41	442.76	656.357	5.9512	10.4551
1195	Mn2Cd2O6	R-3	148	trigonal	1.485	6.26917	-1.595	114.08	10	5.18025	5.18025	5.74817	63.2178	63.2178	60	19.4	15.7429	13.4	3.55528	3	1.26491	43.0694	37.8087	14.486	3.94741	1.758	0.294374	1.10367	0.236996	188.8	47.5369	0.922	0.347125	2.712	0.892713	84.5856	69.0639	3.02e-07	5.7e-07	20.9759	38.1311	728.92	882.83	455.524	571.307	92.76	75.7382	4.0332	5.15256
1196	Hf2Cd2O6	R-3	148	trigonal	3.258	8.50142	-2.789	132.391	10	5.526	5.526	5.93638	62.2616	62.2616	60	28.8	26.5812	12.8	4.66476	3.4	1.74356	67.7798	66.7717	15.704	2.03294	1.794	0.335952	1.144	0.161071	190.4	49.4959	0.992	0.43774	2.666	0.955146	84.8558	68.7343	8.2e-08	1.32e-07	24.0159	37.5611	1237.32	1856.16	652.924	949.799	92.76	75.7382	6.4932	9.7906
1199	Na2Np2O6	R-3	148	trigonal	0.379	6.74855	-2.759	151.566	10	5.8588	5.8588	6.11866	61.3953	61.3953	60	25.6	33.72	11.2	6.17738	3.6	2.72764	61.5976	87.743	17.49	3.8581	1.844	0.398628	1.188	0.101666	194	54.2586	1.064	0.523129	2.522	1.13251	95.159	58.5516	2.5e-07	4.75e-07	29.2159	55.4403	1139.92	1620.01	289.054	333.734	607.36	984.642	2.6532	3.7871
1201	Na2Np2O6	R-3	148	trigonal	0.38	6.776	-2.757	150.952	10	5.83823	5.83823	6.12478	61.536	61.536	60	25.6	33.72	11.2	6.17738	3.6	2.72764	61.5976	87.743	17.49	3.8581	1.844	0.398628	1.188	0.101666	194	54.2586	1.064	0.523129	2.522	1.13251	95.159	58.5516	2.5e-07	4.75e-07	29.2159	55.4403	1139.92	1620.01	289.054	333.734	607.36	984.642	2.6532	3.7871
1203	Hf2Cd2O6	R-3	148	trigonal	3.258	8.51647	-2.788	132.157	10	5.52304	5.52304	5.93253	62.2582	62.2582	60	28.8	26.5812	12.8	4.66476	3.4	1.74356	67.7798	66.7717	15.704	2.03294	1.794	0.335952	1.144	0.161071	190.4	49.4959	0.992	0.43774	2.666	0.955146	84.8558	68.7343	8.2e-08	1.32e-07	24.0159	37.5611	1237.32	1856.16	652.924	949.799	92.76	75.7382	6.4932	9.7906
1204	Cd2Ni2O6	R-3	148	trigonal	0.862	6.67087	-0.857	109.08	10	5.08697	5.08697	5.68482	63.4219	63.4219	60	20	16	14	2.52982	3	1.26491	43.8205	38.0734	14.334	4.2242	1.742	0.279886	1.122	0.20203	187.8	46.3828	0.898	0.324247	2.786	0.804279	106.893	54.6491	2.84e-08	3.48e-08	37.6159	46.0765	899.32	1201.06	497.324	649.836	92.76	75.7382	4.8332	6.61632
1205	Nb2Cu2O6	R-3	148	trigonal	1.754	6.02495	-2.104	112.697	10	5.24145	5.24145	5.62089	62.209	62.209	60	18.8	13.7608	12.8	4.35431	3	1.26491	40.8901	31.8673	14.004	4.27527	1.74	0.27828	1.084	0.215555	188.8	47.8598	0.94	0.382832	2.762	0.836144	126.094	20.6629	3.38e-08	5.95e-08	90.8159	155.999	1697.52	2050.7	854.434	1073.76	92.76	75.7382	8.1132	10.5913
1206	Nb2Cu2O6	R-3	148	trigonal	1.591	6.00997	-2.106	112.978	10	5.25264	5.25264	5.61729	62.1251	62.1251	60	18.8	13.7608	12.8	4.35431	3	1.26491	40.8901	31.8673	14.004	4.27527	1.74	0.27828	1.084	0.215555	188.8	47.8598	0.94	0.382832	2.762	0.836144	126.094	20.6629	3.38e-08	5.95e-08	90.8159	155.999	1697.52	2050.7	854.434	1073.76	92.76	75.7382	8.1132	10.5913
1207	Mg2Np2O6	R-3	148	trigonal	0.373	7.85977	-3.058	130.693	10	5.58686	5.58687	5.8121	61.2739	61.2739	60	25.8	33.6357	11.4	5.8515	3.6	2.72764	61.8606	87.6287	15.534	2.36267	1.736	0.336963	1.128	0.167619	194.2	54.4661	1.024	0.487015	2.598	1.03136	84.5856	69.0639	2.49e-07	4.76e-07	33.2159	63.4342	1181.32	1622.54	399.48	422.165	92.76	75.7382	3.8732	4.49064
1209	Ac2Al2O6	R-3	148	trigonal	3.773	7.66442	-3.216	130.851	10	5.37361	5.37361	6.08318	63.789	63.789	60	25.2	31.9587	12.8	5.03587	3.6	2.72764	60.3959	83.4105	16.926	4.0041	1.774	0.36941	1.143	0.234	191.6	54.1502	1.034	0.540503	2.604	1.03701	99.692	50.6255	5.4e-09	1.08e-08	49.4159	92.9078	1327.12	1534.91	484.174	540.108	92.76	75.7382	5.0732	6.03243
1210	Na2Nb2O6	R-3	148	trigonal	4.009	4.24151	-2.706	128.328	10	5.36711	5.36711	6.00532	63.4574	63.4574	60	15.2	12.9522	10.8	6.49307	2.8	1.16619	32.7789	30.1854	17.338	4.09524	1.802	0.346549	1.152	0.170458	191.2	50.4951	1.016	0.460678	2.568	1.08818	112.835	36.2489	4.02e-08	5.9e-08	38.8159	54.7405	1288.72	1909.29	657.054	1053.61	607.36	984.642	6.0132	10.4341
1211	Ba2Mn2O6	R-3	148	trigonal	1.303	5.5618	-2.2	143.467	10	5.40141	5.40141	6.47815	65.3613	65.3613	60	21	18.6976	11.4	5.8515	3.2	1.6	48.0526	47.1159	19.518	10.0951	1.858	0.459408	1.18367	0.2821	199.6	63.4558	1.054	0.56248	2.552	1.10742	87.3764	65.794	3.56e-07	5.58e-07	5.17595	7.08364	949.52	1054.18	536.68	612.575	92.76	75.7382	4.3732	5.34347
1212	Ac2Al2O6	R-3	148	trigonal	3.769	7.6626	-3.216	130.882	10	5.3732	5.3732	6.08481	63.7988	63.7988	60	25.2	31.9587	12.8	5.03587	3.6	2.72764	60.3959	83.4105	16.926	4.0041	1.774	0.36941	1.143	0.234	191.6	54.1502	1.034	0.540503	2.604	1.03701	99.692	50.6255	5.4e-09	1.08e-08	49.4159	92.9078	1327.12	1534.91	484.174	540.108	92.76	75.7382	5.0732	6.03243
1213	La2Al2O6	R-3	148	trigonal	4.223	5.71579	-3.308	124.275	10	5.31063	5.31063	5.94056	63.4499	63.4499	60	18.8	19.1979	12.8	5.03587	3.4	2.33238	42.777	48.252	16.894	3.95941	1.766	0.354378	1.1254	0.227764	194.6	59.3013	1.02	0.515364	2.606	1.03409	102.008	47.7393	1.28e-07	2.44e-07	49.6159	92.8281	1361.12	1585.34	458.174	500.801	92.76	75.7382	3.5132	4.27469
1214	Nd2Cr2O6	R-3	148	trigonal	2.809	6.26198	-2.942	129.532	10	5.47845	5.47845	5.90249	62.3493	62.3493	60	21.6	20.1752	12	4.89898	3.6	2.33238	48.8473	49.6931	15.98	4.55034	1.802	0.360799	1.1993	0.129807	198	60.8769	1.02	0.50024	2.624	1.01283	97.4456	57.0596	1.54e-07	2.49e-07	22.2159	36.4891	1317.52	1509.26	728.28	870.823	92.76	75.7382	5.6532	7.88688
1215	La2Al2O6	R-3	148	trigonal	4.258	5.73977	-3.307	123.756	10	5.30352	5.30352	5.93188	63.4464	63.4464	60	18.8	19.1979	12.8	5.03587	3.4	2.33238	42.777	48.252	16.894	3.95941	1.766	0.354378	1.1254	0.227764	194.6	59.3013	1.02	0.515364	2.606	1.03409	102.008	47.7393	1.28e-07	2.44e-07	49.6159	92.8281	1361.12	1585.34	458.174	500.801	92.76	75.7382	3.5132	4.27469
1216	Gd2Al2O6	R-3	148	trigonal	4.726	6.7001	-3.386	115.111	10	5.23843	5.23843	5.71043	62.6986	62.6986	60	20.2	21.9854	14.2	2.4	3.4	2.33238	46.4459	55.5651	16.396	3.34588	1.748	0.320899	1.106	0.227099	190.8	52.8068	0.996	0.473016	2.628	1.0025	92.938	60.2983	2.67e-07	5.21e-07	49.2159	92.9892	1317.12	1520.34	536.574	624.987	92.76	75.7382	4.2732	4.96662
1217	Gd2Cr2O6	R-3	148	trigonal	2.737	6.91423	-3.046	123.561	10	5.41302	5.41302	5.78597	62.1103	62.1103	60	22.4	21.7035	12.8	4.11825	3.6	2.33238	51.4489	54.7068	15.842	4.41694	1.792	0.344697	1.159	0.130859	194.8	55.9121	1.008	0.479767	2.638	0.9925	97.4456	57.0596	2.87e-07	5.14e-07	21.0159	36.7387	1347.52	1550.74	785.88	914.942	92.76	75.7382	6.2332	8.07631
1218	Ac2Cr2O6	R-3	148	trigonal	2.425	7.72544	-2.889	140.571	10	5.57829	5.57829	6.13043	62.9372	62.9372	60	27.4	31.4172	11.4	5.71314	3.8	2.71293	65.3989	81.9945	16.372	4.99344	1.818	0.387319	1.196	0.128	195.6	57.1265	1.046	0.545586	2.614	1.02757	104.2	46.0648	2.54e-08	5.08e-08	21.2159	36.6863	1357.52	1564.84	733.48	874.274	92.76	75.7382	7.0332	8.59149
1219	Ca2Hf2O6	R-3	148	trigonal	5.346	6.62994	-3.65	133.529	10	5.52663	5.52663	5.97193	62.4374	62.4374	60	23.2	24.8387	10.8	6.4	3.2	1.6	53.3132	63.2793	18.344	4.21119	1.82	0.368293	1.154	0.158947	193	52.7409	1.06	0.515364	2.53	1.11882	85.3298	68.1532	7.48e-08	1.33e-07	44.6159	78.1999	1380.72	1863.06	757.08	966.066	92.76	75.7382	6.9412	9.82271
1220	Eu2Ge2O6	R-3	148	trigonal	3.855	7.4936	-2.63	120.814	10	5.20508	5.20508	5.96191	64.1175	64.1175	60	23.8	21.6924	14.2	2.71293	3.6	2.33238	54.5204	53.4325	18.936	5.22085	1.804	0.356011	1.1497	0.191338	192.4	54.6648	0.99	0.472694	2.704	0.937968	125.046	22.5214	0.00010018	0.00019991	14.8159	23.2312	1032.72	1224.62	494.96	540.254	92.76	75.7382	8.3332	12.2378
1221	Nb2Ag2O6	R-3	148	trigonal	2.471	6.21064	-2.039	133.029	10	5.41964	5.41964	6.09428	63.5991	63.5991	60	22.4	17.7381	12.8	4.35431	3.2	1.46969	49.7546	41.6113	14.636	3.3409	1.77	0.306985	1.13733	0.172284	191.8	51.2031	0.968	0.406664	2.768	0.830022	127.387	20.389	3.37e-08	5.95e-08	96.8159	167.898	1544.52	1959.4	829.866	1063.31	92.76	75.7382	7.7532	10.4453
1222	Ba2Ge2O6	R-3	148	trigonal	3.416	5.99597	-2.294	142.883	10	5.35452	5.35452	6.53234	65.8048	65.8048	60	22.4	19.2	12.8	5.45527	3.2	1.6	51.593	48.1539	20.774	8.81222	1.87	0.465016	1.208	0.236423	196.4	61.4576	1.036	0.556043	2.644	1.03724	111.164	49.3488	0.000100068	0.000199966	15.6159	23.2582	1101.32	1274.28	475.16	519.156	92.76	75.7382	8.0932	12.2302
1223	Ac2Cr2O6	R-3	148	trigonal	2.57	7.75223	-2.888	140.085	10	5.57381	5.57381	6.12086	62.915	62.915	60	27.4	31.4172	11.4	5.71314	3.8	2.71293	65.3989	81.9945	16.372	4.99344	1.818	0.387319	1.196	0.128	195.6	57.1265	1.046	0.545586	2.614	1.02757	104.2	46.0648	2.54e-08	5.08e-08	21.2159	36.6863	1357.52	1564.84	733.48	874.274	92.76	75.7382	7.0332	8.59149
1224	Eu2Ge2O6	R-3	148	trigonal	4.024	7.49352	-2.629	120.815	10	5.20431	5.20431	5.96304	64.1269	64.1269	60	23.8	21.6924	14.2	2.71293	3.6	2.33238	54.5204	53.4325	18.936	5.22085	1.804	0.356011	1.1497	0.191338	192.4	54.6648	0.99	0.472694	2.704	0.937968	125.046	22.5214	0.00010018	0.00019991	14.8159	23.2312	1032.72	1224.62	494.96	540.254	92.76	75.7382	8.3332	12.2378
1225	Na2As2O6	R-3	148	trigonal	3.425	4.35477	-1.761	111.275	10	4.9472	4.9472	5.97655	65.5509	65.5509	60	13.6	9.76934	12.8	5.9127	2.6	0.8	29.1819	23.0295	17.762	3.45996	1.736	0.296014	1.12	0.233238	177.6	39.0774	0.944	0.393223	2.686	1.0045	110.673	37.9267	7.58e-08	1.29e-07	38.0159	54.5416	462.72	464.104	325.054	401.585	947.36	1009.41	6.1932	10.7928
1226	Gd2Al2O6	R-3	148	trigonal	4.733	6.71579	-3.385	114.842	10	5.23794	5.23794	5.70146	62.6548	62.6548	60	20.2	21.9854	14.2	2.4	3.4	2.33238	46.4459	55.5651	16.396	3.34588	1.748	0.320899	1.106	0.227099	190.8	52.8068	0.996	0.473016	2.628	1.0025	92.938	60.2983	2.67e-07	5.21e-07	49.2159	92.9892	1317.12	1520.34	536.574	624.987	92.76	75.7382	4.2732	4.96662
1227	Na2As2O6	R-3	148	trigonal	3.434	4.35777	-1.76	111.198	10	4.94662	4.94662	5.9743	65.5442	65.5442	60	13.6	9.76934	12.8	5.9127	2.6	0.8	29.1819	23.0295	17.762	3.45996	1.736	0.296014	1.12	0.233238	177.6	39.0774	0.944	0.393223	2.686	1.0045	110.673	37.9267	7.58e-08	1.29e-07	38.0159	54.5416	462.72	464.104	325.054	401.585	947.36	1009.41	6.1932	10.7928
1228	Ba2Ge2O6	R-3	148	trigonal	3.414	6.00004	-2.294	142.786	10	5.35479	5.35479	6.52847	65.7882	65.7882	60	22.4	19.2	12.8	5.45527	3.2	1.6	51.593	48.1539	20.774	8.81222	1.87	0.465016	1.208	0.236423	196.4	61.4576	1.036	0.556043	2.644	1.03724	111.164	49.3488	0.000100068	0.000199966	15.6159	23.2582	1101.32	1274.28	475.16	519.156	92.76	75.7382	8.0932	12.2302
1229	Gd2Cr2O6	R-3	148	trigonal	2.75	6.91577	-3.046	123.533	10	5.41369	5.41369	5.78426	62.0976	62.0976	60	22.4	21.7035	12.8	4.11825	3.6	2.33238	51.4489	54.7068	15.842	4.41694	1.792	0.344697	1.159	0.130859	194.8	55.9121	1.008	0.479767	2.638	0.9925	97.4456	57.0596	2.87e-07	5.14e-07	21.0159	36.7387	1347.52	1550.74	785.88	914.942	92.76	75.7382	6.2332	8.07631
1230	Er2Al2O6	R-3	148	trigonal	5.106	7.25445	-3.459	110.897	10	5.18843	5.18843	5.62144	62.517	62.517	60	21	23.5797	15	1.26491	3.4	2.33238	48.4477	59.5577	16.108	3.08357	1.738	0.302549	1.097	0.229033	190.8	52.8068	0.986	0.455702	2.634	0.994054	92.938	60.2983	1.77e-07	3.41e-07	50.0159	92.6736	1240.72	1413.41	579.974	699.39	92.76	75.7382	6.2532	7.93896
1231	Ba2Mn2O6	R-3	148	trigonal	1.302	5.55954	-2.2	143.525	10	5.40051	5.40051	6.48158	65.3796	65.3796	60	21	18.6976	11.4	5.8515	3.2	1.6	48.0526	47.1159	19.518	10.0951	1.858	0.459408	1.18367	0.2821	199.6	63.4558	1.054	0.56248	2.552	1.10742	87.3764	65.794	3.56e-07	5.58e-07	5.17595	7.08364	949.52	1054.18	536.68	612.575	92.76	75.7382	4.3732	5.34347
1232	Nb2Ag2O6	R-3	148	trigonal	2.313	6.21449	-2.039	132.946	10	5.42082	5.42082	6.0899	63.5724	63.5724	60	22.4	17.7381	12.8	4.35431	3.2	1.46969	49.7546	41.6113	14.636	3.3409	1.77	0.306985	1.13733	0.172284	191.8	51.2031	0.968	0.406664	2.768	0.830022	127.387	20.389	3.37e-08	5.95e-08	96.8159	167.898	1544.52	1959.4	829.866	1063.31	92.76	75.7382	7.7532	10.4453
1233	Nd2Cr2O6	R-3	148	trigonal	2.627	6.26562	-2.941	129.457	10	5.4789	5.4789	5.8995	62.3317	62.3317	60	21.6	20.1752	12	4.89898	3.6	2.33238	48.8473	49.6931	15.98	4.55034	1.802	0.360799	1.1993	0.129807	198	60.8769	1.02	0.50024	2.624	1.01283	97.4456	57.0596	1.54e-07	2.49e-07	22.2159	36.4891	1317.52	1509.26	728.28	870.823	92.76	75.7382	5.6532	7.88688
1234	Gd2Fe2O6	R-3	148	trigonal	2.201	6.99742	-2.658	123.919	10	5.42366	5.42366	5.78506	62.0459	62.0459	60	22.8	21.7476	13.2	3.48712	3.6	2.33238	52.2186	54.7362	15.814	4.47155	1.788	0.341667	1.1415	0.161289	194.6	55.7337	0.996	0.473016	2.672	0.96082	87.4994	65.657	2.82e-07	5.15e-07	18.2159	31.183	1385.52	1591.2	712.08	808.167	92.76	75.7382	4.8932	5.84587
1235	Gd2Fe2O6	R-3	148	trigonal	2.092	6.99806	-2.658	123.907	10	5.42494	5.42494	5.78314	62.0286	62.0286	60	22.8	21.7476	13.2	3.48712	3.6	2.33238	52.2186	54.7362	15.814	4.47155	1.788	0.341667	1.1415	0.161289	194.6	55.7337	0.996	0.473016	2.672	0.96082	87.4994	65.657	2.82e-07	5.15e-07	18.2159	31.183	1385.52	1591.2	712.08	808.167	92.76	75.7382	4.8932	5.84587
1236	Ga2Bi2O6	R-3	148	trigonal	2.605	8.01487	-1.708	135.374	10	5.29195	5.29195	6.36325	65.4289	65.4289	60	27.6	29.0971	15.2	1.16619	3.2	1.6	65.3403	74.7733	17.038	3.03307	1.7	0.229347	1.115	0.197737	192.4	54.1021	0.93	0.365294	2.83	0.75004	111.068	39.8255	2.88e-07	5.09e-07	7.41595	11.2252	916.92	1032.55	202.342	196.175	92.76	75.7382	3.4312	4.27411
1237	Er2Al2O6	R-3	148	trigonal	4.975	7.25772	-3.459	110.847	10	5.18747	5.18747	5.62081	62.5192	62.5192	60	21	23.5797	15	1.26491	3.4	2.33238	48.4477	59.5577	16.108	3.08357	1.738	0.302549	1.097	0.229033	190.8	52.8068	0.986	0.455702	2.634	0.994054	92.938	60.2983	1.77e-07	3.41e-07	50.0159	92.6736	1240.72	1413.41	579.974	699.39	92.76	75.7382	6.2532	7.93896
1239	Nd2Fe2O6	R-3	148	trigonal	2.137	6.3537	-2.558	129.674	10	5.48663	5.48663	5.8971	62.277	62.277	60	22	20.2386	12.4	4.45421	3.6	2.33238	49.617	49.7657	15.952	4.6042	1.798	0.358017	1.1818	0.164774	197.8	60.7236	1.008	0.494061	2.658	0.982291	87.4994	65.657	1.49e-07	2.5e-07	19.4159	30.9971	1355.52	1551.54	654.48	752.226	92.76	75.7382	4.3132	5.44021
1240	Na2Bi2O6	R-3	148	trigonal	1.474	6.48406	-1.455	143.397	10	5.61319	5.6132	6.17413	62.9625	62.9625	60	23.6	29.7227	12.8	5.9127	3	1.54919	55.9937	76.5413	19.434	2.6575	1.78	0.324654	1.195	0.0888819	196	57.1314	1.004	0.446927	2.654	1.0225	113.344	35.9185	2.7e-07	5.15e-07	29.6159	55.2784	652.72	721.817	215.934	204.835	607.36	984.642	2.8332	4.13722
1242	Ce2Al2O6	R-3	148	trigonal	4.127	5.75544	-3.209	124.117	10	5.32348	5.32348	5.91792	63.2707	63.2707	60	19	19.5959	13	4.64758	3.4	2.33238	43.0191	48.7344	16.554	3.52166	1.764	0.350634	1.107	0.226971	192.6	55.8484	1	0.48	2.61	1.02828	105.482	43.9734	1.53e-07	2.93e-07	49.2159	92.9892	1339.12	1552.56	433.174	465.36	92.76	75.7382	3.3732	4.19513
1243	Na2Bi2O6	R-3	148	trigonal	1.474	6.4924	-1.454	143.213	10	5.61359	5.61359	6.16788	62.9308	62.9308	60	23.6	29.7227	12.8	5.9127	3	1.54919	55.9937	76.5413	19.434	2.6575	1.78	0.324654	1.195	0.0888819	196	57.1314	1.004	0.446927	2.654	1.0225	113.344	35.9185	2.7e-07	5.15e-07	29.6159	55.2784	652.72	721.817	215.934	204.835	607.36	984.642	2.8332	4.13722
1244	Nd2Ga2O6	R-3	148	trigonal	3.838	6.78994	-2.729	128.131	10	5.46154	5.46154	5.87756	62.315	62.315	60	23	20.5329	13.4	3.87814	3.6	2.33238	52.3926	50.4183	16.894	2.83763	1.764	0.341092	1.1633	0.201751	195.4	59.0647	1.006	0.493137	2.654	0.98569	92.8836	60.3445	1.57e-07	2.49e-07	9.21595	11.8772	1224.12	1417.37	352.862	481.75	92.76	75.7382	2.6712	3.03741
1245	Ga2Bi2O6	R-3	148	trigonal	2.612	8.00532	-1.709	135.535	10	5.28571	5.28571	6.37896	65.5242	65.5242	60	27.6	29.0971	15.2	1.16619	3.2	1.6	65.3403	74.7733	17.038	3.03307	1.7	0.229347	1.115	0.197737	192.4	54.1021	0.93	0.365294	2.83	0.75004	111.068	39.8255	2.88e-07	5.09e-07	7.41595	11.2252	916.92	1032.55	202.342	196.175	92.76	75.7382	3.4312	4.27411
1246	Nd2Fe2O6	R-3	148	trigonal	2.139	6.35344	-2.558	129.68	10	5.48729	5.48729	5.89646	62.2701	62.2701	60	22	20.2386	12.4	4.45421	3.6	2.33238	49.617	49.7657	15.952	4.6042	1.798	0.358017	1.1818	0.164774	197.8	60.7236	1.008	0.494061	2.658	0.982291	87.4994	65.657	1.49e-07	2.5e-07	19.4159	30.9971	1355.52	1551.54	654.48	752.226	92.76	75.7382	4.3132	5.44021
1247	Lu2Al2O6	R-3	148	trigonal	5.213	7.68839	-3.506	107.967	10	5.15092	5.15092	5.56086	62.4101	62.4101	60	21.6	24.7758	15.6	1.35647	3.4	2.33238	49.9893	62.6334	15.972	2.99043	1.728	0.284422	1.0912	0.231015	187.6	47.5924	0.98	0.445421	2.64	0.985677	99.5	50.8763	1.21e-07	2.3e-07	50.2159	92.5989	1347.52	1565.01	604.574	742.759	92.76	75.7382	6.6732	8.67156
1248	Ce2Al2O6	R-3	148	trigonal	4.122	5.75391	-3.21	124.15	10	5.32414	5.32414	5.91819	63.2684	63.2684	60	19	19.5959	13	4.64758	3.4	2.33238	43.0191	48.7344	16.554	3.52166	1.764	0.350634	1.107	0.226971	192.6	55.8484	1	0.48	2.61	1.02828	105.482	43.9734	1.53e-07	2.93e-07	49.2159	92.9892	1339.12	1552.56	433.174	465.36	92.76	75.7382	3.3732	4.19513
1249	Ho2Al2O6	R-3	148	trigonal	4.952	7.12509	-3.443	111.825	10	5.20009	5.20009	5.64052	62.5511	62.5511	60	20.8	23.181	14.8	1.46969	3.4	2.33238	47.982	58.6286	16.164	3.128	1.74	0.306203	1.0992	0.228431	191.6	54.1502	0.99	0.462601	2.632	0.996863	92.938	60.2983	1.68e-07	3.23e-07	50.2159	92.5989	1211.12	1374.31	566.374	675.756	92.76	75.7382	5.6732	6.96724
1250	Ac2Er2O6	R-3	148	trigonal	3.665	8.95063	-3.672	164.097	10	6.015	6.015	6.28397	61.4061	61.4061	60	36.2	35.1704	13	5.05964	4.6	3.2	88.4514	90.724	18.618	2.01163	1.864	0.42514	1.214	0.092	202.4	64.1891	1.14	0.617058	2.53	1.11553	91.3396	61.7228	1.72e-07	3.44e-07	5.41595	6.66843	1396.92	1606.22	657.88	753.991	92.76	75.7382	6.9132	8.40472
1251	Cd2Ge2O6	R-3	148	trigonal	1.799	6.71697	-1.684	115.227	10	5.15161	5.15161	5.82933	63.7767	63.7767	60	20.8	16.473	14.8	1.6	3	1.26491	46.6098	39.5433	15.742	1.99163	1.77	0.306985	1.128	0.190725	185.6	44.0572	0.904	0.32946	2.804	0.785483	108.373	54.8547	0.000100014	0.000199993	31.4159	40.1851	880.72	1165.7	394.004	458.999	92.76	75.7382	7.7532	12.2517
1252	K2Nb2O6	R-3	148	trigonal	3.887	3.92022	-2.694	152.492	10	5.49972	5.49972	6.63118	65.5004	65.5004	60	16.8	12.8281	10.8	6.49307	3	1.26491	36.0006	29.8262	21.77	12.3468	1.898	0.496806	1.224	0.225708	195.8	56.3503	1.096	0.575555	2.546	1.12167	111.939	37.7453	4.54e-08	6.07e-08	30.8159	40.4175	1263.92	1911.66	650.186	1055.56	537.36	844.944	5.9592	10.4523
1253	Ba2Mo2O6	R-3	148	trigonal	0.318	5.98133	-2.349	156.17	10	5.69028	5.69028	6.46606	63.8954	63.8954	60	24.4	20.5679	11.2	6.01332	3.4	1.74356	56.253	51.0081	19.924	9.62756	1.882	0.47178	1.209	0.234572	199.6	63.4558	1.088	0.580565	2.674	1.0205	101.811	51.3791	7.9e-08	1.32e-07	31.4159	54.2406	1465.12	1897.98	812.08	1104.4	92.76	75.7382	8.9332	13.8646
1254	K2Nb2O6	R-3	148	trigonal	3.891	3.91578	-2.694	152.665	10	5.49714	5.49714	6.64106	65.5515	65.5515	60	16.8	12.8281	10.8	6.49307	3	1.26491	36.0006	29.8262	21.77	12.3468	1.898	0.496806	1.224	0.225708	195.8	56.3503	1.096	0.575555	2.546	1.12167	111.939	37.7453	4.54e-08	6.07e-08	30.8159	40.4175	1263.92	1911.66	650.186	1055.56	537.36	844.944	5.9592	10.4523
1255	Nd2Ga2O6	R-3	148	trigonal	3.854	6.78877	-2.729	128.153	10	5.46142	5.46142	5.87843	62.3202	62.3202	60	23	20.5329	13.4	3.87814	3.6	2.33238	52.3926	50.4183	16.894	2.83763	1.764	0.341092	1.1633	0.201751	195.4	59.0647	1.006	0.493137	2.654	0.98569	92.8836	60.3445	1.57e-07	2.49e-07	9.21595	11.8772	1224.12	1417.37	352.862	481.75	92.76	75.7382	2.6712	3.03741
1256	Cd2Ge2O6	R-3	148	trigonal	1.801	6.71731	-1.684	115.221	10	5.15225	5.15225	5.82822	63.7678	63.7678	60	20.8	16.473	14.8	1.6	3	1.26491	46.6098	39.5433	15.742	1.99163	1.77	0.306985	1.128	0.190725	185.6	44.0572	0.904	0.32946	2.804	0.785483	108.373	54.8547	0.000100014	0.000199993	31.4159	40.1851	880.72	1165.7	394.004	458.999	92.76	75.7382	7.7532	12.2517
1257	Ac2Er2O6	R-3	148	trigonal	3.668	8.93451	-3.672	164.393	10	6.00992	6.00992	6.29763	61.5001	61.5001	60	36.2	35.1704	13	5.05964	4.6	3.2	88.4514	90.724	18.618	2.01163	1.864	0.42514	1.214	0.092	202.4	64.1891	1.14	0.617058	2.53	1.11553	91.3396	61.7228	1.72e-07	3.44e-07	5.41595	6.66843	1396.92	1606.22	657.88	753.991	92.76	75.7382	6.9132	8.40472
1259	Ho2Al2O6	R-3	148	trigonal	4.95	7.12797	-3.442	111.779	10	5.20006	5.20006	5.63892	62.5428	62.5428	60	20.8	23.181	14.8	1.46969	3.4	2.33238	47.982	58.6286	16.164	3.128	1.74	0.306203	1.0992	0.228431	191.6	54.1502	0.99	0.462601	2.632	0.996863	92.938	60.2983	1.68e-07	3.23e-07	50.2159	92.5989	1211.12	1374.31	566.374	675.756	92.76	75.7382	5.6732	6.96724
1260	Gd2Ga2O6	R-3	148	trigonal	3.86	7.45823	-2.832	122.442	10	5.40296	5.40296	5.76088	62.0348	62.0348	60	23.8	21.9854	14.2	2.4	3.6	2.33238	54.9942	55.1996	16.756	2.66613	1.754	0.322837	1.123	0.195131	192.2	53.7788	0.994	0.472	2.668	0.964353	92.8836	60.3445	2.9e-07	5.13e-07	8.01595	11.3201	1254.12	1463.38	410.462	595.079	92.76	75.7382	3.2512	3.96344
1261	Lu2Al2O6	R-3	148	trigonal	5.189	7.6869	-3.506	107.988	10	5.15161	5.15161	5.56077	62.4056	62.4056	60	21.6	24.7758	15.6	1.35647	3.4	2.33238	49.9893	62.6334	15.972	2.99043	1.728	0.284422	1.0912	0.231015	187.6	47.5924	0.98	0.445421	2.64	0.985677	99.5	50.8763	1.21e-07	2.3e-07	50.2159	92.5989	1347.52	1565.01	604.574	742.759	92.76	75.7382	6.6732	8.67156
1262	Ac2Fe2O6	R-3	148	trigonal	2.265	7.84562	-2.518	140.047	10	5.58117	5.58117	6.11023	62.8252	62.8252	60	27.8	31.3841	11.8	5.38145	3.8	2.71293	66.1686	81.883	16.344	5.04475	1.814	0.384895	1.1785	0.163	195.4	56.9547	1.034	0.540503	2.648	0.997826	94.2534	57.5445	2e-08	4e-08	18.4159	31.1393	1395.52	1604.7	659.68	756.726	92.76	75.7382	5.6932	6.70112
1263	Ac2Fe2O6	R-3	148	trigonal	2.114	7.84341	-2.518	140.086	10	5.58409	5.58409	6.10774	62.7978	62.7978	60	27.8	31.3841	11.8	5.38145	3.8	2.71293	66.1686	81.883	16.344	5.04475	1.814	0.384895	1.1785	0.163	195.4	56.9547	1.034	0.540503	2.648	0.997826	94.2534	57.5445	2e-08	4e-08	18.4159	31.1393	1395.52	1604.7	659.68	756.726	92.76	75.7382	5.6932	6.70112
1264	Fe2Bi2O6	R-3	148	trigonal	1.501	7.8288	-1.505	132.704	10	5.42373	5.42373	6.07779	63.5004	63.5004	60	26.6	29.0489	14.2	3.1241	3.2	1.6	62.5647	74.8167	16.096	4.75577	1.734	0.262267	1.1335	0.16533	194.8	56.0371	0.932	0.366955	2.834	0.744623	105.684	49.5104	2.8e-07	5.11e-07	17.6159	31.3445	1048.32	1243.07	503.96	680.474	92.76	75.7382	5.0732	6.01184
1266	Hf2Hg2O6	R-3	148	trigonal	1.767	10.3313	-2.388	137.287	10	5.60109	5.60109	5.99924	62.1721	62.1721	60	35.2	33.409	12.8	4.66476	3.6	1.95959	85.4156	85.3039	15.922	1.77314	1.804	0.347828	1.175	0.162604	190	49.0265	0.976	0.423774	2.728	0.89814	84.8558	68.7343	2.6e-07	3.74e-07	6.27595	8.95494	1155.3	1872.06	580.944	965.036	442.76	656.357	5.6912	9.93673
1267	Ce2Ga2O6	R-3	148	trigonal	3.841	6.49629	-2.666	131.813	10	5.49441	5.49441	5.95674	62.5359	62.5359	60	22.6	19.8151	13	4.64758	3.6	2.33238	51.5674	48.9198	16.914	2.86384	1.77	0.352136	1.124	0.194895	194	56.7239	0.998	0.479016	2.65	0.991847	105.428	44.0523	1.76e-07	2.87e-07	8.01595	11.3201	1276.12	1497.75	307.062	392.416	92.76	75.7382	2.3512	2.60788
1268	Li2Nb2O6	R-3	148	trigonal	3.846	4.43195	-2.717	110.788	10	5.2132	5.2132	5.58712	62.1903	62.1903	60	13.6	13.8362	10.8	6.49307	2.6	1.2	29.5691	31.8624	15.186	2.75119	1.712	0.261258	1.1	0.197585	183.6	43.4401	0.956	0.395656	2.578	1.07321	114.188	34.0442	4.94e-08	6.31e-08	27.8159	35.4185	1380.52	1911.74	673.618	1049.62	737.36	1244.26	6.0932	10.4092
1269	Ce2Cr2O6	R-3	148	trigonal	2.651	5.98523	-2.877	133.232	10	5.51693	5.51693	5.97446	62.5025	62.5025	60	21.2	19.4155	11.6	5.42586	3.6	2.33238	48.0221	48.1112	16	4.57073	1.808	0.370643	1.16	0.130231	196.6	58.6706	1.012	0.486555	2.62	1.01871	109.99	37.9537	1.73e-07	2.88e-07	21.0159	36.7387	1369.52	1581.92	682.48	845.357	92.76	75.7382	5.3332	7.85408
1270	Eu2Hf2O6	R-3	148	trigonal	4.964	9.08288	-3.776	138.378	10	5.57629	5.57629	6.06385	62.626	62.626	60	31.8	29.2875	12.2	4.91528	4	2.52982	75.6904	73.586	18.898	5.25987	1.828	0.379125	1.1657	0.159637	197.2	58.5812	1.078	0.539793	2.566	1.07122	101.528	54.834	2.48e-07	3.52e-07	7.41595	9.48705	1389.32	1864.87	753.88	964.901	92.76	75.7382	7.0732	9.84771
1271	Ac2In2O6	R-3	148	trigonal	2.542	8.1491	-2.63	158.865	10	5.92359	5.92359	6.24719	61.6992	61.6992	60	32.4	32.4506	12.8	5.03587	4	2.75681	77.9632	83.772	18.078	2.32028	1.792	0.374347	1.196	0.128	195.2	56.7852	1.07	0.558713	2.638	1.00619	97.1196	53.735	1.6e-08	3.2e-08	18.8159	31.9306	1237.72	1458.08	383.43	491.717	92.76	75.7382	3.5852	5.33867
1273	K2As2O6	R-3	148	trigonal	3.281	4.06097	-1.689	132.499	10	5.02676	5.02676	6.7145	68.0176	68.0176	60	15.2	9.86712	12.8	5.9127	2.8	0.979796	32.4036	23.0647	22.194	11.9952	1.832	0.476462	1.192	0.284422	182.2	47.7259	1.024	0.534026	2.664	1.04318	109.777	39.3101	8.1e-08	1.28e-07	30.0159	39.988	437.92	428.33	318.186	401.036	877.36	900.514	6.1392	10.8113
1274	Ce2Ga2O6	R-3	148	trigonal	3.843	6.46196	-2.668	132.514	10	5.49667	5.49667	5.97659	62.6226	62.6226	60	22.6	19.8151	13	4.64758	3.6	2.33238	51.5674	48.9198	16.914	2.86384	1.77	0.352136	1.124	0.194895	194	56.7239	0.998	0.479016	2.65	0.991847	105.428	44.0523	1.76e-07	2.87e-07	8.01595	11.3201	1276.12	1497.75	307.062	392.416	92.76	75.7382	2.3512	2.60788
1276	Ce2Cr2O6	R-3	148	trigonal	2.651	5.97988	-2.878	133.351	10	5.51595	5.51595	5.97949	62.5329	62.5329	60	21.2	19.4155	11.6	5.42586	3.6	2.33238	48.0221	48.1112	16	4.57073	1.808	0.370643	1.16	0.130231	196.6	58.6706	1.012	0.486555	2.62	1.01871	109.99	37.9537	1.73e-07	2.88e-07	21.0159	36.7387	1369.52	1581.92	682.48	845.357	92.76	75.7382	5.3332	7.85408
1277	Li2Nb2O6	R-3	148	trigonal	4.052	4.43444	-2.717	110.726	10	5.20917	5.20917	5.58978	62.228	62.228	60	13.6	13.8362	10.8	6.49307	2.6	1.2	29.5691	31.8624	15.186	2.75119	1.712	0.261258	1.1	0.197585	183.6	43.4401	0.956	0.395656	2.578	1.07321	114.188	34.0442	4.94e-08	6.31e-08	27.8159	35.4185	1380.52	1911.74	673.618	1049.62	737.36	1244.26	6.0932	10.4092
1279	Hf2Hg2O6	R-3	148	trigonal	1.624	10.3321	-2.388	137.276	10	5.60076	5.60076	5.99929	62.1742	62.1742	60	35.2	33.409	12.8	4.66476	3.6	1.95959	85.4156	85.3039	15.922	1.77314	1.804	0.347828	1.175	0.162604	190	49.0265	0.976	0.423774	2.728	0.89814	84.8558	68.7343	2.6e-07	3.74e-07	6.27595	8.95494	1155.3	1872.06	580.944	965.036	442.76	656.357	5.6912	9.93673
1281	Ac2In2O6	R-3	148	trigonal	2.542	8.13341	-2.631	159.172	10	5.92103	5.92103	6.25862	61.7688	61.7688	60	32.4	32.4506	12.8	5.03587	4	2.75681	77.9632	83.772	18.078	2.32028	1.792	0.374347	1.196	0.128	195.2	56.7852	1.07	0.558713	2.638	1.00619	97.1196	53.735	1.6e-08	3.2e-08	18.8159	31.9306	1237.72	1458.08	383.43	491.717	92.76	75.7382	3.5852	5.33867
1282	Eu2Ni2O6	R-3	148	trigonal	0.777	7.52379	-1.765	114.173	10	5.1407	5.1407	5.80485	63.7177	63.7177	60	23	21.4476	13.4	3.2	3.6	2.33238	51.7311	52.7738	17.528	7.08017	1.776	0.335774	1.1437	0.20325	194.6	56.2907	0.984	0.470174	2.686	0.951874	123.566	23.1097	1.94e-07	3.54e-07	21.0159	35.4081	1051.32	1256.08	598.28	694.708	92.76	75.7382	5.4132	6.84272
1284	Ac2Ho2O6	R-3	148	trigonal	3.67	8.80761	-3.663	165.883	10	6.03733	6.03733	6.30603	61.3998	61.3998	60	36	34.9914	12.8	5.03587	4.6	3.2	87.9857	90.3233	18.674	2.01035	1.866	0.427158	1.2162	0.0876	203.2	65.1564	1.144	0.62118	2.528	1.11784	91.3396	61.7228	1.63e-07	3.26e-07	5.61595	6.96143	1367.32	1574.86	644.28	733.568	92.76	75.7382	6.3332	7.54454
1285	Eu2Ni2O6	R-3	148	trigonal	1.033	7.50988	-1.767	114.385	10	5.13498	5.13498	5.82069	63.8261	63.8261	60	23	21.4476	13.4	3.2	3.6	2.33238	51.7311	52.7738	17.528	7.08017	1.776	0.335774	1.1437	0.20325	194.6	56.2907	0.984	0.470174	2.686	0.951874	123.566	23.1097	1.94e-07	3.54e-07	21.0159	35.4081	1051.32	1256.08	598.28	694.708	92.76	75.7382	5.4132	6.84272
1286	Al2Bi2O6	R-3	148	trigonal	2.882	7.26865	-2.305	129.743	10	5.08668	5.08668	6.49226	66.9366	66.9366	60	24	29.5635	15.2	1.16619	3	1.54919	56.792	76.213	16.678	3.67278	1.694	0.225175	1.098	0.228749	191	53.1413	0.932	0.366955	2.79	0.806573	111.123	39.7305	2.65e-07	5.17e-07	48.6159	93.2432	979.92	1130.75	328.454	357.026	92.76	75.7382	4.4532	5.18253
1287	Eu2Hf2O6	R-3	148	trigonal	4.974	9.07752	-3.776	138.46	10	5.5782	5.5782	6.06403	62.6166	62.6166	60	31.8	29.2875	12.2	4.91528	4	2.52982	75.6904	73.586	18.898	5.25987	1.828	0.379125	1.1657	0.159637	197.2	58.5812	1.078	0.539793	2.566	1.07122	101.528	54.834	2.48e-07	3.52e-07	7.41595	9.48705	1389.32	1864.87	753.88	964.901	92.76	75.7382	7.0732	9.84771
1288	Ce2Mo2O6	R-3	148	trigonal	0.326	6.55749	-2.414	143.861	10	5.74361	5.74361	6.0293	61.5554	61.5554	60	24.8	21.1887	11.6	5.42586	3.8	2.4	56.8108	51.8991	16.43	3.75353	1.83	0.387814	1.127	0.189304	196.6	58.6706	1.044	0.50918	2.72	0.941148	111.564	36.1462	1.59e-07	2.91e-07	30.0159	54.6575	1763.12	2088.44	825.68	1107.04	92.76	75.7382	8.4332	13.9342
1289	La2Ga2O6	R-3	148	trigonal	3.975	6.47245	-2.761	131.678	10	5.48591	5.48591	5.96296	62.613	62.613	60	22.4	19.4587	12.8	5.03587	3.6	2.33238	51.3253	48.482	17.254	3.35137	1.772	0.355831	1.1424	0.194214	196	60.0799	1.018	0.514525	2.646	0.99803	101.954	47.8081	1.51e-07	2.38e-07	8.41595	11.453	1298.12	1532.61	332.062	441.064	92.76	75.7382	2.4912	2.78588
1290	Al2In2O6	R-3	148	trigonal	2.739	5.93047	-2.494	106.287	10	5.11558	5.11558	5.54238	62.5163	62.5163	60	17.2	16.0175	14.8	1.46969	2.8	1.16619	37.9595	38.6639	15.568	2.85213	1.666	0.181064	1.079	0.236989	183.6	41.5432	0.916	0.342789	2.742	0.856561	98.718	51.9148	2.14e-08	3.11e-08	63.4159	91.478	1081.52	1222.31	305.524	345.929	92.76	75.7382	2.9252	4.06156
1291	Cr2Bi2O6	R-3	148	trigonal	1.806	7.63331	-1.917	134.428	10	5.32825	5.32825	6.27353	64.8708	64.8708	60	26.2	29.0682	13.8	3.91918	3.2	1.6	61.7949	74.9016	16.124	4.70278	1.738	0.267013	1.151	0.136836	195	56.2139	0.944	0.377656	2.8	0.792061	115.63	32.1634	2.85e-07	5.1e-07	20.4159	36.9214	1010.32	1180.03	577.76	823.255	92.76	75.7382	6.4132	8.16777
1292	Ce2Fe2O6	R-3	148	trigonal	2.113	6.07116	-2.498	133.452	10	5.5233	5.5233	5.97359	62.4638	62.4638	60	21.6	19.4895	12	5.05964	3.6	2.33238	48.7918	48.1993	15.972	4.62448	1.804	0.368	1.1425	0.160888	196.4	58.5068	1	0.48	2.654	0.988486	100.043	52.3934	1.68e-07	2.89e-07	18.2159	31.183	1407.52	1621.08	608.68	717.899	92.76	75.7382	3.9932	5.31243
1293	La2Ga2O6	R-3	148	trigonal	3.818	6.45532	-2.762	132.027	10	5.48703	5.48703	5.97291	62.6563	62.6563	60	22.4	19.4587	12.8	5.03587	3.6	2.33238	51.3253	48.482	17.254	3.35137	1.772	0.355831	1.1424	0.194214	196	60.0799	1.018	0.514525	2.646	0.99803	101.954	47.8081	1.51e-07	2.38e-07	8.41595	11.453	1298.12	1532.61	332.062	441.064	92.76	75.7382	2.4912	2.78588
1294	Ac2Ho2O6	R-3	148	trigonal	3.662	8.8103	-3.663	165.833	10	6.037	6.037	6.30507	61.3967	61.3967	60	36	34.9914	12.8	5.03587	4.6	3.2	87.9857	90.3233	18.674	2.01035	1.866	0.427158	1.2162	0.0876	203.2	65.1564	1.144	0.62118	2.528	1.11784	91.3396	61.7228	1.63e-07	3.26e-07	5.61595	6.96143	1367.32	1574.86	644.28	733.568	92.76	75.7382	6.3332	7.54454
1295	Ce2Fe2O6	R-3	148	trigonal	2.282	6.07531	-2.498	133.361	10	5.52316	5.52316	5.97085	62.4508	62.4508	60	21.6	19.4895	12	5.05964	3.6	2.33238	48.7918	48.1993	15.972	4.62448	1.804	0.368	1.1425	0.160888	196.4	58.5068	1	0.48	2.654	0.988486	100.043	52.3934	1.68e-07	2.89e-07	18.2159	31.183	1407.52	1621.08	608.68	717.899	92.76	75.7382	3.9932	5.31243
1296	Ac2Mo2O6	R-3	148	trigonal	0.628	8.31696	-2.431	148.121	10	5.72314	5.72314	6.17939	62.4138	62.4138	60	31	31.8496	11.4	5.71314	4	2.75681	74.1876	82.4408	16.802	4.22042	1.84	0.403237	1.163	0.194	195.6	57.1265	1.078	0.563929	2.714	0.95137	105.774	44.7912	1.1e-08	2.2e-08	30.2159	54.5893	1751.12	2077.81	876.68	1122.79	92.76	75.7382	10.1332	13.991
1297	Nd2Al2O6	R-3	148	trigonal	4.374	6.03716	-3.276	120.595	10	5.29346	5.29346	5.83412	63.021	63.021	60	19.4	20.3922	13.4	3.87814	3.4	2.33238	43.8443	50.3787	16.534	3.49832	1.758	0.339435	1.1463	0.235737	194	58.258	1.008	0.494061	2.614	1.0225	92.938	60.2983	1.34e-07	2.55e-07	50.4159	92.5258	1287.12	1477.39	478.974	532.072	92.76	75.7382	3.6932	4.40112
1298	Cs2Np2O6	R-3	148	trigonal	0.375	6.61278	-2.745	209.88	10	6.05197	6.05197	7.4827	66.1466	66.1466	60	34.4	34.4941	11.2	6.17738	4.2	2.85657	83.5807	89.0754	26.922	22.1222	2.076	0.756217	1.318	0.265812	213.6	81.7058	1.22	0.733648	2.494	1.17255	93.6866	59.6783	2.82e-07	4.66e-07	8.41595	13.9847	1097.52	1621.81	275.198	331.48	480.36	731.275	2.5512	3.79402
1299	Cs2Nb2O6	R-3	148	trigonal	3.479	5.0983	-2.64	178.362	10	5.58371	5.58371	7.35048	67.6775	67.6775	60	24	20.0898	10.8	6.49307	3.4	1.74356	54.762	49.1305	26.77	22.2293	2.034	0.743333	1.282	0.314223	210.8	79.946	1.172	0.701267	2.54	1.13093	111.363	38.7201	7.24e-08	9.05e-08	18.0159	22.7558	1246.32	1914.12	643.198	1057.73	480.36	731.275	5.9112	10.4694
1300	La2Fe2O6	R-3	148	trigonal	2.232	6.05675	-2.596	133.106	10	5.51813	5.51813	5.96891	62.4683	62.4683	60	21.4	19.1165	11.8	5.38145	3.6	2.33238	48.5497	47.7409	16.312	5.00564	1.806	0.371354	1.1609	0.157922	198.4	61.6882	1.02	0.515364	2.65	0.994706	96.5694	55.2509	1.43e-07	2.39e-07	18.6159	31.1006	1429.52	1651.59	633.68	735.422	92.76	75.7382	4.1332	5.35931
1301	Ba2Ni2O6	R-3	148	trigonal	0.259	5.71697	-1.439	141.754	10	5.50895	5.50894	6.26145	63.9019	63.9019	60	21.6	18.8637	12	5.51362	3.2	1.6	48.8037	47.2494	19.366	10.2812	1.842	0.453802	1.202	0.24758	198.6	62.7681	1.03	0.554401	2.626	1.0488	109.684	49.2041	8.24e-08	1.32e-07	21.8159	35.2855	1119.92	1303.56	578.48	681.439	92.76	75.7382	5.1732	6.72574
1303	Ac2Lu2O6	R-3	148	trigonal	3.634	9.2906	-3.698	160.847	10	5.94682	5.94682	6.27459	61.7135	61.7135	60	36.8	35.729	13.6	5.31413	4.6	3.2	89.993	92.105	18.482	2.04049	1.854	0.41548	1.2082	0.1036	199.2	60.5884	1.134	0.611019	2.536	1.10863	97.9016	52.756	1.16e-07	2.32e-07	5.61595	6.96143	1503.72	1731.5	682.48	791.968	92.76	75.7382	7.3332	9.06939
1304	Ba2Np2O6	R-3	148	trigonal	2.735	7.49306	-3.335	187.183	10	6.19268	6.19268	6.67449	62.3605	62.3605	60	34.6	34.6156	11.4	5.8515	4.2	2.85657	84.465	89.5812	20.366	9.17336	1.926	0.505632	1.254	0.155126	204.6	67.6804	1.156	0.637294	2.514	1.14381	87.3764	65.794	3.08e-07	4.65e-07	4.81595	6.98621	1337.32	1669.33	414.88	441.924	92.76	75.7382	3.7332	4.34658
1305	Al2In2O6	R-3	148	trigonal	2.741	5.92496	-2.494	106.386	10	5.11579	5.11579	5.5458	62.5334	62.5334	60	17.2	16.0175	14.8	1.46969	2.8	1.16619	37.9595	38.6639	15.568	2.85213	1.666	0.181064	1.079	0.236989	183.6	41.5432	0.916	0.342789	2.742	0.856561	98.718	51.9148	2.14e-08	3.11e-08	63.4159	91.478	1081.52	1222.31	305.524	345.929	92.76	75.7382	2.9252	4.06156
1308	K2Np2O6	R-3	148	trigonal	0.377	5.98351	-2.78	179.886	10	5.98158	5.98158	6.75496	63.7202	63.7202	60	27.2	33.1747	11.2	6.17738	3.8	2.71293	64.8193	86.5539	21.922	12.2152	1.94	0.52684	1.26	0.164438	198.6	59.5302	1.144	0.620503	2.5	1.16386	94.2626	59.2227	2.55e-07	4.73e-07	21.2159	39.4599	1115.12	1620.52	282.186	332.33	537.36	844.944	2.5992	3.78939
1309	Eu2Bi2O6	R-3	148	trigonal	0.244	8.6639	-2.212	156.757	10	5.97306	5.97306	6.13452	60.8669	60.8669	60	34	32.4654	14.4	2.72764	4	2.52982	81.7885	82.5675	20.472	4.51601	1.796	0.349434	1.2027	0.0871674	202.6	64.4286	1.05	0.512874	2.706	0.936496	119.443	26.4806	4.4e-07	5.54e-07	4.41595	5.70086	781.52	846.771	361.56	414.621	92.76	75.7382	4.1532	4.84464
1310	Ba2Hf2O6	R-3	148	trigonal	4.434	7.49491	-3.504	161.211	10	5.72579	5.72579	6.57019	64.1676	64.1676	60	30.4	27.897	10.8	6.4	3.6	1.95959	72.763	70.7291	20.736	8.8433	1.894	0.47965	1.224	0.207133	201.2	64.6696	1.124	0.607473	2.506	1.15197	87.6466	65.4364	1.36e-07	1.67e-07	8.21595	10.1537	1457.92	1884.92	734.08	958.611	92.76	75.7382	6.8332	9.80749
1314	Ba2Hf2O6	R-3	148	trigonal	4.41	7.48024	-3.504	161.527	10	5.73164	5.73164	6.57149	64.1448	64.1448	60	30.4	27.897	10.8	6.4	3.6	1.95959	72.763	70.7291	20.736	8.8433	1.894	0.47965	1.224	0.207133	201.2	64.6696	1.124	0.607473	2.506	1.15197	87.6466	65.4364	1.36e-07	1.67e-07	8.21595	10.1537	1457.92	1884.92	734.08	958.611	92.76	75.7382	6.8332	9.80749
1315	Ca2Hf2O6	R-3	148	trigonal	5.337	6.62854	-3.65	133.557	10	5.52679	5.52679	5.97263	62.44	62.44	60	23.2	24.8387	10.8	6.4	3.2	1.6	53.3132	63.2793	18.344	4.21119	1.82	0.368293	1.154	0.158947	193	52.7409	1.06	0.515364	2.53	1.11882	85.3298	68.1532	7.48e-08	1.33e-07	44.6159	78.1999	1380.72	1863.06	757.08	966.066	92.76	75.7382	6.9412	9.82271
1316	Cr2Bi2O6	R-3	148	trigonal	1.821	7.61902	-1.917	134.68	10	5.3314	5.3314	6.27771	64.8728	64.8728	60	26.2	29.0682	13.8	3.91918	3.2	1.6	61.7949	74.9016	16.124	4.70278	1.738	0.267013	1.151	0.136836	195	56.2139	0.944	0.377656	2.8	0.792061	115.63	32.1634	2.85e-07	5.1e-07	20.4159	36.9214	1010.32	1180.03	577.76	823.255	92.76	75.7382	6.4132	8.16777
1317	Ba2Np2O6	R-3	148	trigonal	2.737	7.50202	-3.332	186.96	10	6.18777	6.18777	6.67484	62.3859	62.3859	60	34.6	34.6156	11.4	5.8515	4.2	2.85657	84.465	89.5812	20.366	9.17336	1.926	0.505632	1.254	0.155126	204.6	67.6804	1.156	0.637294	2.514	1.14381	87.3764	65.794	3.08e-07	4.65e-07	4.81595	6.98621	1337.32	1669.33	414.88	441.924	92.76	75.7382	3.7332	4.34658
1318	K2Bi2O6	R-3	148	trigonal	1.496	5.74829	-1.45	171.059	10	5.72456	5.72456	6.87409	65.3933	65.3933	60	25.2	29.2123	12.8	5.9127	3.2	1.6	59.2154	75.415	23.866	11.1425	1.876	0.486152	1.267	0.15361	200.6	62.0116	1.084	0.566307	2.632	1.05986	112.447	37.4403	2.75e-07	5.13e-07	21.6159	39.3135	627.92	706.057	209.066	200.045	537.36	844.944	2.7792	4.14167
1319	Na2Nb2O6	R-3	148	trigonal	4.038	4.24447	-2.705	128.239	10	5.36965	5.36965	5.99885	63.4129	63.4129	60	15.2	12.9522	10.8	6.49307	2.8	1.16619	32.7789	30.1854	17.338	4.09524	1.802	0.346549	1.152	0.170458	191.2	50.4951	1.016	0.460678	2.568	1.08818	112.835	36.2489	4.02e-08	5.9e-08	38.8159	54.7405	1288.72	1909.29	657.054	1053.61	607.36	984.642	6.0132	10.4341
1321	K2Bi2O6	R-3	148	trigonal	1.491	5.74897	-1.45	171.038	10	5.72784	5.72784	6.86833	65.3562	65.3562	60	25.2	29.2123	12.8	5.9127	3.2	1.6	59.2154	75.415	23.866	11.1425	1.876	0.486152	1.267	0.15361	200.6	62.0116	1.084	0.566307	2.632	1.05986	112.447	37.4403	2.75e-07	5.13e-07	21.6159	39.3135	627.92	706.057	209.066	200.045	537.36	844.944	2.7792	4.14167
1322	K2Np2O6	R-3	148	trigonal	0.378	5.97835	-2.781	180.041	10	5.98456	5.98456	6.75518	63.7071	63.7071	60	27.2	33.1747	11.2	6.17738	3.8	2.71293	64.8193	86.5539	21.922	12.2152	1.94	0.52684	1.26	0.164438	198.6	59.5302	1.144	0.620503	2.5	1.16386	94.2626	59.2227	2.55e-07	4.73e-07	21.2159	39.4599	1115.12	1620.52	282.186	332.33	537.36	844.944	2.5992	3.78939
1323	Nd2Al2O6	R-3	148	trigonal	4.222	6.03951	-3.276	120.548	10	5.29319	5.29319	5.83283	63.016	63.016	60	19.4	20.3922	13.4	3.87814	3.4	2.33238	43.8443	50.3787	16.534	3.49832	1.758	0.339435	1.1463	0.235737	194	58.258	1.008	0.494061	2.614	1.0225	92.938	60.2983	1.34e-07	2.55e-07	50.4159	92.5258	1287.12	1477.39	478.974	532.072	92.76	75.7382	3.6932	4.40112
1324	Ac2Lu2O6	R-3	148	trigonal	3.641	9.30514	-3.698	160.596	10	5.94318	5.94318	6.27194	61.7193	61.7193	60	36.8	35.729	13.6	5.31413	4.6	3.2	89.993	92.105	18.482	2.04049	1.854	0.41548	1.2082	0.1036	199.2	60.5884	1.134	0.611019	2.536	1.10863	97.9016	52.756	1.16e-07	2.32e-07	5.61595	6.96143	1503.72	1731.5	682.48	791.968	92.76	75.7382	7.3332	9.06939
1327	Cd2Ni2O6	R-3	148	trigonal	1.11	6.7392	-0.854	107.974	10	5.06253	5.06253	5.67521	63.5113	63.5113	60	20	16	14	2.52982	3	1.26491	43.8205	38.0734	14.334	4.2242	1.742	0.279886	1.122	0.20203	187.8	46.3828	0.898	0.324247	2.786	0.804279	106.893	54.6491	2.84e-08	3.48e-08	37.6159	46.0765	899.32	1201.06	497.324	649.836	92.76	75.7382	4.8332	6.61632
1329	Ac2Mo2O6	R-3	148	trigonal	0.786	8.35248	-2.43	147.491	10	5.70398	5.70398	6.18431	62.5377	62.5377	60	31	31.8496	11.4	5.71314	4	2.75681	74.1876	82.4408	16.802	4.22042	1.84	0.403237	1.163	0.194	195.6	57.1265	1.078	0.563929	2.714	0.95137	105.774	44.7912	1.1e-08	2.2e-08	30.2159	54.5893	1751.12	2077.81	876.68	1122.79	92.76	75.7382	10.1332	13.991
1330	La2Fe2O6	R-3	148	trigonal	2.222	6.06455	-2.596	132.935	10	5.5149	5.5149	5.96741	62.4783	62.4783	60	21.4	19.1165	11.8	5.38145	3.6	2.33238	48.5497	47.7409	16.312	5.00564	1.806	0.371354	1.1609	0.157922	198.4	61.6882	1.02	0.515364	2.65	0.994706	96.5694	55.2509	1.43e-07	2.39e-07	18.6159	31.1006	1429.52	1651.59	633.68	735.422	92.76	75.7382	4.1332	5.35931
1333	Eu2Bi2O6	R-3	148	trigonal	0.244	8.67242	-2.212	156.603	10	5.9691	5.9691	6.13469	60.8889	60.8889	60	34	32.4654	14.4	2.72764	4	2.52982	81.7885	82.5675	20.472	4.51601	1.796	0.349434	1.2027	0.0871674	202.6	64.4286	1.05	0.512874	2.706	0.936496	119.443	26.4806	4.4e-07	5.54e-07	4.41595	5.70086	781.52	846.771	361.56	414.621	92.76	75.7382	4.1532	4.84464
1334	Eu2Mn2O6	R-3	148	trigonal	1.763	7.02487	-2.535	120.507	10	5.22611	5.22611	5.9212	63.8128	63.8128	60	22.4	21.341	12.8	3.96989	3.6	2.33238	50.98	52.696	17.68	6.84807	1.792	0.346376	1.12537	0.239703	195.6	57.1265	1.008	0.481971	2.612	1.02046	101.258	55.3281	4.68e-07	5.98e-07	4.37595	5.67622	880.92	983.043	556.48	628.621	92.76	75.7382	4.6132	5.52485
1335	Dy2Al2O6	R-3	148	trigonal	4.837	6.99051	-3.425	112.823	10	5.2124	5.2124	5.66115	62.5893	62.5893	60	20.6	22.7824	14.6	1.74356	3.4	2.33238	47.4959	57.6591	16.218	3.174	1.742	0.309864	1.1172	0.226675	191.2	53.4767	0.992	0.466064	2.63	0.99968	92.938	60.2983	1.91e-07	3.68e-07	49.2159	92.9892	1180.52	1335.45	555.574	657.185	92.76	75.7382	4.4932	5.23266
1336	Dy2Al2O6	R-3	148	trigonal	4.976	6.98812	-3.425	112.861	10	5.21258	5.21258	5.66231	62.5943	62.5943	60	20.6	22.7824	14.6	1.74356	3.4	2.33238	47.4959	57.6591	16.218	3.174	1.742	0.309864	1.1172	0.226675	191.2	53.4767	0.992	0.466064	2.63	0.99968	92.938	60.2983	1.91e-07	3.68e-07	49.2159	92.9892	1180.52	1335.45	555.574	657.185	92.76	75.7382	4.4932	5.23266
1337	Ac2Ga2O6	R-3	148	trigonal	3.162	8.26644	-2.68	138.493	10	5.54888	5.54888	6.1024	62.9577	62.9577	60	28.8	31.3904	12.8	5.03587	3.8	2.71293	68.9442	81.7211	17.286	3.40066	1.78	0.370675	1.16	0.2	193	55.0781	1.032	0.539756	2.644	1.00113	99.6376	50.6878	2.8e-08	5.6e-08	8.21595	11.3797	1264.12	1478.94	358.062	491.945	92.76	75.7382	4.0512	5.39138
1338	Eu2Mn2O6	R-3	148	trigonal	1.803	7.01885	-2.535	120.61	10	5.22569	5.22569	5.92554	63.8357	63.8357	60	22.4	21.341	12.8	3.96989	3.6	2.33238	50.98	52.696	17.68	6.84807	1.792	0.346376	1.12537	0.239703	195.6	57.1265	1.008	0.481971	2.612	1.02046	101.258	55.3281	4.68e-07	5.98e-07	4.37595	5.67622	880.92	983.043	556.48	628.621	92.76	75.7382	4.6132	5.52485
1341	Cs2Bi2O6	R-3	148	trigonal	1.262	6.44807	-1.401	200.81	10	5.82693	5.82693	7.61293	67.499	67.499	60	32.4	31.1679	12.8	5.9127	3.6	1.95959	77.9768	79.6275	28.866	21.0926	2.012	0.740308	1.325	0.257682	215.6	83.1711	1.16	0.695011	2.626	1.07013	111.871	38.4305	3.02e-07	5.06e-07	8.81595	13.9384	610.32	696.801	202.078	196.041	480.36	731.275	2.7312	4.14798
1343	Ho2Cu2O6	R-3	148	trigonal	0.521	7.83945	-2.092	117.125	10	5.35005	5.35005	5.64506	61.7142	61.7142	60	24	22.987	14.4	2.05913	3.6	2.33238	55.2949	57.828	15.586	4.27157	1.764	0.317591	1.1282	0.1759	194.2	55.9729	0.986	0.460504	2.69	0.942677	108.417	54.8633	1.66e-07	3.24e-07	83.2159	158.513	1292.72	1474.23	651.234	740.105	92.76	75.7382	6.1532	7.36815
1344	Ac2Ga2O6	R-3	148	trigonal	3.171	8.26376	-2.68	138.538	10	5.54702	5.54702	6.10623	62.9859	62.9859	60	28.8	31.3904	12.8	5.03587	3.8	2.71293	68.9442	81.7211	17.286	3.40066	1.78	0.370675	1.16	0.2	193	55.0781	1.032	0.539756	2.644	1.00113	99.6376	50.6878	2.8e-08	5.6e-08	8.21595	11.3797	1264.12	1478.94	358.062	491.945	92.76	75.7382	4.0512	5.39138
1345	Gd2Ga2O6	R-3	148	trigonal	3.965	7.45868	-2.832	122.435	10	5.40198	5.40198	5.7618	62.0452	62.0452	60	23.8	21.9854	14.2	2.4	3.6	2.33238	54.9942	55.1996	16.756	2.66613	1.754	0.322837	1.123	0.195131	192.2	53.7788	0.994	0.472	2.668	0.964353	92.8836	60.3445	2.9e-07	5.13e-07	8.01595	11.3201	1254.12	1463.38	410.462	595.079	92.76	75.7382	3.2512	3.96344
1347	K2As2O6	R-3	148	trigonal	3.265	4.09561	-1.686	131.378	10	5.02909	5.02909	6.66393	67.8312	67.8312	60	15.2	9.86712	12.8	5.9127	2.8	0.979796	32.4036	23.0647	22.194	11.9952	1.832	0.476462	1.192	0.284422	182.2	47.7259	1.024	0.534026	2.664	1.04318	109.777	39.3101	8.1e-08	1.28e-07	30.0159	39.988	437.92	428.33	318.186	401.036	877.36	900.514	6.1392	10.8113
1348	Cs2Bi2O6	R-3	148	trigonal	1.376	6.41097	-1.402	201.972	10	5.81687	5.81686	7.66723	67.7076	67.7076	60	32.4	31.1679	12.8	5.9127	3.6	1.95959	77.9768	79.6275	28.866	21.0926	2.012	0.740308	1.325	0.257682	215.6	83.1711	1.16	0.695011	2.626	1.07013	111.871	38.4305	3.02e-07	5.06e-07	8.81595	13.9384	610.32	696.801	202.078	196.041	480.36	731.275	2.7312	4.14798
1349	La2Cr2O6	R-3	148	trigonal	2.568	5.96682	-2.977	132.969	10	5.50549	5.50549	5.98027	62.5932	62.5932	60	21	19.0368	11.4	5.71314	3.6	2.33238	47.78	47.648	16.34	4.95411	1.81	0.373952	1.1784	0.123977	198.6	61.8372	1.032	0.521014	2.616	1.02461	106.516	42.6285	1.48e-07	2.38e-07	21.4159	36.6382	1391.52	1613.69	707.48	858.14	92.76	75.7382	5.4732	7.86204
1351	La2Cr2O6	R-3	148	trigonal	2.568	5.96668	-2.977	132.973	10	5.5065	5.5065	5.9791	62.5819	62.5819	60	21	19.0368	11.4	5.71314	3.6	2.33238	47.78	47.648	16.34	4.95411	1.81	0.373952	1.1784	0.123977	198.6	61.8372	1.032	0.521014	2.616	1.02461	106.516	42.6285	1.48e-07	2.38e-07	21.4159	36.6382	1391.52	1613.69	707.48	858.14	92.76	75.7382	5.4732	7.86204
1352	Ni2Hg2O6	R-3	148	trigonal	0.376	8.87221	-0.486	115.023	10	5.15278	5.15278	5.82009	63.7255	63.7255	60	26.4	27.897	14	2.52982	3.2	1.6	61.4563	71.505	14.552	4.17759	1.752	0.295797	1.153	0.206582	187.4	45.8589	0.882	0.30016	2.848	0.72549	106.893	54.6491	2.06e-07	3.78e-07	19.8759	35.7061	817.296	1202.65	425.344	655.028	442.76	656.357	4.0312	6.63293
1353	Ni2Hg2O6	R-3	148	trigonal	0.502	8.89422	-0.485	114.738	10	5.15348	5.15348	5.80849	63.6652	63.6652	60	26.4	27.897	14	2.52982	3.2	1.6	61.4563	71.505	14.552	4.17759	1.752	0.295797	1.153	0.206582	187.4	45.8589	0.882	0.30016	2.848	0.72549	106.893	54.6491	2.06e-07	3.78e-07	19.8759	35.7061	817.296	1202.65	425.344	655.028	442.76	656.357	4.0312	6.63293
1357	Ca2Mn2O6	R-3	148	trigonal	1.996	4.11951	-2.413	115.296	10	5.18201	5.18371	5.78942	63.4073	63.3932	60.0136	13.8	7.27736	11.4	5.8515	2.8	0.979796	28.6028	16.1354	17.126	5.96778	1.784	0.333623	1.11367	0.237263	191.4	50.9886	0.99	0.451664	2.576	1.07187	85.0596	68.4874	2.95e-07	5.73e-07	41.5759	79.2692	872.32	975.121	559.68	631.409	92.76	75.7382	4.4812	5.42058
1358	Ca2Mn2O6	P-1	2	triclinic	1.776	3.9582	-2.42	119.994	10	5.23783	5.24545	5.88824	63.457	63.45	59.988	13.8	7.27736	11.4	5.8515	2.8	0.979796	28.6028	16.1354	17.126	5.96778	1.784	0.333623	1.11367	0.237263	191.4	50.9886	0.99	0.451664	2.576	1.07187	85.0596	68.4874	2.95e-07	5.73e-07	41.5759	79.2692	872.32	975.121	559.68	631.409	92.76	75.7382	4.4812	5.42058
1359	Ga4Bi4O12	Pnma	62	orthorhombic	1.222	7.74619	-1.645	280.138	20	5.71164	5.99042	8.18755	90	90	90	27.6	29.0971	15.2	1.16619	3.2	1.6	65.3403	74.7733	17.038	3.03307	1.7	0.229347	1.115	0.197737	192.4	54.1021	0.93	0.365294	2.83	0.75004	111.068	39.8255	2.88e-07	5.09e-07	7.41595	11.2252	916.92	1032.55	202.342	196.175	92.76	75.7382	3.4312	4.27411
1360	Np4Be4O12	Pnma	62	orthorhombic	1.666	12.1196	-3.059	161.133	20	4.75005	4.98189	6.80913	90	90	90	24.2	34.4349	11.4	5.8515	3.4	2.8	58.8021	89.14	13.704	4.95906	1.696	0.347022	1.074	0.262114	183.6	47.0302	0.942	0.449907	2.65	0.969825	84.5856	69.0639	2.48e-07	4.76e-07	39.2159	75.4275	1457.12	1742.73	526.88	613.628	92.76	75.7382	3.7232	4.3368
1362	Ac4As4O12	Pnma	62	orthorhombic	2.97	7.00032	-2.622	332.016	20	5.87919	6.52674	8.65258	90	90	90	29.2	31.4286	13.2	5.11468	3.8	2.71293	69.984	81.7575	17.516	3.04179	1.776	0.369789	1.14	0.24	184.2	51.5457	1.026	0.537684	2.718	0.949071	106.854	44.0267	6.6e-08	1.32e-07	12.4159	19.3557	946.12	1349.21	515.48	569.006	432.76	636.443	8.4732	10.9951
1363	Gd4Cr4O12	Pnma	62	orthorhombic	2.406	7.55966	-3.185	226.023	20	5.30721	5.58511	7.62526	90	90	90	22.4	21.7035	12.8	4.11825	3.6	2.33238	51.4489	54.7068	15.842	4.41694	1.792	0.344697	1.159	0.130859	194.8	55.9121	1.008	0.479767	2.638	0.9925	97.4456	57.0596	2.87e-07	5.14e-07	21.0159	36.7387	1347.52	1550.74	785.88	914.942	92.76	75.7382	6.2332	8.07631
1364	Nd4Cr4O12	Pnma	62	orthorhombic	2.29	6.88717	-3.122	235.548	20	5.42636	5.60238	7.74813	90	90	90	21.6	20.1752	12	4.89898	3.6	2.33238	48.8473	49.6931	15.98	4.55034	1.802	0.360799	1.1993	0.129807	198	60.8769	1.02	0.50024	2.624	1.01283	97.4456	57.0596	1.54e-07	2.49e-07	22.2159	36.4891	1317.52	1509.26	728.28	870.823	92.76	75.7382	5.6532	7.88688
1367	Ac4Au4O12	Pnma	62	orthorhombic	0.745	10.3186	-2.006	303.807	20	5.89867	6.74997	7.6303	90	90	90	38.4	37.3663	12.4	5.08331	4.2	2.85657	94.393	96.4807	16.968	3.93167	1.834	0.398477	1.222	0.076	195.6	57.1265	1.046	0.545586	2.79	0.918695	135.889	60.0842	4.4e-09	8.8e-09	66.4159	126.877	1394.52	1603.62	564.946	624.815	92.76	75.7382	5.4332	6.39999
1370	Ag4Bi4O12	Pnma	62	orthorhombic	0.357	8.97855	-0.816	269.907	20	5.77968	6.05007	7.71879	90	90	90	30.8	30.1556	14.8	1.93907	3.4	1.74356	72.9694	76.7511	16.732	3.57488	1.748	0.279528	1.18033	0.0989298	196.6	57.7082	0.956	0.389543	2.854	0.718265	127.895	19.4183	2.63e-07	5.18e-07	87.6159	171.22	908.52	1019.92	388.746	463.641	92.76	75.7382	4.5732	5.33061
1371	Nd4Fe4O12	Pnma	62	orthorhombic	1.081	6.91522	-2.706	238.289	20	5.43086	5.64785	7.76877	90	90	90	22	20.2386	12.4	4.45421	3.6	2.33238	49.617	49.7657	15.952	4.6042	1.798	0.358017	1.1818	0.164774	197.8	60.7236	1.008	0.494061	2.658	0.982291	87.4994	65.657	1.49e-07	2.5e-07	19.4159	30.9971	1355.52	1551.54	654.48	752.226	92.76	75.7382	4.3132	5.44021
1372	Gd4Fe4O12	Pnma	62	orthorhombic	1.164	7.5801	-2.766	228.786	20	5.33005	5.61419	7.64561	90	90	90	22.8	21.7476	13.2	3.48712	3.6	2.33238	52.2186	54.7362	15.814	4.47155	1.788	0.341667	1.1415	0.161289	194.6	55.7337	0.996	0.473016	2.672	0.96082	87.4994	65.657	2.82e-07	5.15e-07	18.2159	31.183	1385.52	1591.2	712.08	808.167	92.76	75.7382	4.8932	5.84587
1374	Ac4Er4O12	Pnma	62	orthorhombic	3.463	8.61549	-3.539	340.961	20	6.09531	6.24037	8.96392	90	90	90	36.2	35.1704	13	5.05964	4.6	3.2	88.4514	90.724	18.618	2.01163	1.864	0.42514	1.214	0.092	202.4	64.1891	1.14	0.617058	2.53	1.11553	91.3396	61.7228	1.72e-07	3.44e-07	5.41595	6.66843	1396.92	1606.22	657.88	753.991	92.76	75.7382	6.9132	8.40472
1382	Li4Nb4O12	Pnma	62	orthorhombic	2.622	4.69901	-2.693	208.983	20	5.16129	5.39274	7.50833	90	90	90	13.6	13.8362	10.8	6.49307	2.6	1.2	29.5691	31.8624	15.186	2.75119	1.712	0.261258	1.1	0.197585	183.6	43.4401	0.956	0.395656	2.578	1.07321	114.188	34.0442	4.94e-08	6.31e-08	27.8159	35.4185	1380.52	1911.74	673.618	1049.62	737.36	1244.26	6.0932	10.4092
1383	Ce4Mg4O12	Pnma	62	orthorhombic	0.613	4.89312	-2.711	288.348	20	5.94568	5.67371	8.54768	90	90	90	18.8	19.6611	10.8	6.4	3.4	2.33238	42.4838	48.9219	17.354	2.11558	1.742	0.34862	1.144	0.15819	197.8	59.7006	1.032	0.499856	2.55	1.09168	97.1296	57.2463	1.57e-07	2.92e-07	34.2159	63.0355	1053.32	1380.83	431.08	463.123	92.76	75.7382	2.9732	3.51819
1384	Gd4Mn4O12	Pnma	62	orthorhombic	0.23	7.51979	-2.944	229.82	20	5.31944	5.73951	7.52743	90	90	90	22.6	21.7219	13	3.79473	3.6	2.33238	52.0372	54.7253	15.866	4.37016	1.79	0.343162	1.10067	0.237245	194.8	55.9121	1.006	0.478565	2.616	1.0149	84.5856	69.0639	5.5e-07	6.75e-07	3.77595	4.7022	1225.52	1440.42	653.68	733.772	92.76	75.7382	4.7732	5.66517
1385	Ce4Cr4O12	Pnma	62	orthorhombic	2.196	6.60785	-3.082	241.357	20	5.51112	5.59654	7.82529	90	90	90	21.2	19.4155	11.6	5.42586	3.6	2.33238	48.0221	48.1112	16	4.57073	1.808	0.370643	1.16	0.130231	196.6	58.6706	1.012	0.486555	2.62	1.01871	109.99	37.9537	1.73e-07	2.88e-07	21.0159	36.7387	1369.52	1581.92	682.48	845.357	92.76	75.7382	5.3332	7.85408
1386	Fe4Bi4O12	Pnma	62	orthorhombic	1.283	8.6096	-1.552	241.338	20	5.44682	5.67499	7.80761	90	90	90	26.6	29.0489	14.2	3.1241	3.2	1.6	62.5647	74.8167	16.096	4.75577	1.734	0.262267	1.1335	0.16533	194.8	56.0371	0.932	0.366955	2.834	0.744623	105.684	49.5104	2.8e-07	5.11e-07	17.6159	31.3445	1048.32	1243.07	503.96	680.474	92.76	75.7382	5.0732	6.01184
1389	Ac4Ho4O12	Pnma	62	orthorhombic	3.62	8.53469	-3.535	342.376	20	6.1132	6.25536	8.9533	90	90	90	36	34.9914	12.8	5.03587	4.6	3.2	87.9857	90.3233	18.674	2.01035	1.866	0.427158	1.2162	0.0876	203.2	65.1564	1.144	0.62118	2.528	1.11784	91.3396	61.7228	1.63e-07	3.26e-07	5.61595	6.96143	1367.32	1574.86	644.28	733.568	92.76	75.7382	6.3332	7.54454
1390	Ce4Fe4O12	Pnma	62	orthorhombic	1.144	6.63328	-2.669	244.286	20	5.51797	5.64154	7.84732	90	90	90	21.6	19.4895	12	5.05964	3.6	2.33238	48.7918	48.1993	15.972	4.62448	1.804	0.368	1.1425	0.160888	196.4	58.5068	1	0.48	2.654	0.988486	100.043	52.3934	1.68e-07	2.89e-07	18.2159	31.183	1407.52	1621.08	608.68	717.899	92.76	75.7382	3.9932	5.31243
1392	Ac4Lu4O12	Pnma	62	orthorhombic	3.32	8.90627	-3.553	335.577	20	6.07271	6.19433	8.92104	90	90	90	36.8	35.729	13.6	5.31413	4.6	3.2	89.993	92.105	18.482	2.04049	1.854	0.41548	1.2082	0.1036	199.2	60.5884	1.134	0.611019	2.536	1.10863	97.9016	52.756	1.16e-07	2.32e-07	5.61595	6.96143	1503.72	1731.5	682.48	791.968	92.76	75.7382	7.3332	9.06939
1393	Na4Np4O12	Pnma	62	orthorhombic	1.898	7.42409	-2.851	275.549	20	5.65454	5.93695	8.20803	90	90	90	25.6	33.72	11.2	6.17738	3.6	2.72764	61.5976	87.743	17.49	3.8581	1.844	0.398628	1.188	0.101666	194	54.2586	1.064	0.523129	2.522	1.13251	95.159	58.5516	2.5e-07	4.75e-07	29.2159	55.4403	1139.92	1620.01	289.054	333.734	607.36	984.642	2.6532	3.7871
1394	Dy4Cu4O12	Pnma	62	orthorhombic	0.256	8.30077	-2.282	219.286	20	5.20534	5.85989	7.18908	90	90	90	23.8	22.6133	14.2	2.22711	3.6	2.33238	54.8088	56.9074	15.64	4.31261	1.766	0.320974	1.1462	0.170581	193.8	55.3404	0.988	0.464	2.688	0.945778	108.417	54.8633	1.89e-07	3.69e-07	82.2159	158.949	1262.12	1439.81	640.434	724.454	92.76	75.7382	4.9732	5.85328
1401	Eu4Fe4O12	Pnma	62	orthorhombic	0.232	6.32142	-2.13	268.786	20	5.67003	5.64266	8.40114	90	90	90	22.6	21.3691	13	3.68782	3.6	2.33238	51.1614	52.7109	17.628	6.92684	1.79	0.344906	1.1662	0.158648	195.4	56.9547	0.998	0.476504	2.668	0.966921	104.172	50.0506	2e-07	3.52e-07	18.8159	31.067	1040.92	1238.45	614.88	721.962	92.76	75.7382	4.7332	5.71335
1403	La4Al4O12	Pnma	62	orthorhombic	3.985	6.52325	-3.56	217.784	20	5.36745	5.35884	7.57159	90	90	90	18.8	19.1979	12.8	5.03587	3.4	2.33238	42.777	48.252	16.894	3.95941	1.766	0.354378	1.1254	0.227764	194.6	59.3013	1.02	0.515364	2.606	1.03409	102.008	47.7393	1.28e-07	2.44e-07	49.6159	92.8281	1361.12	1585.34	458.174	500.801	92.76	75.7382	3.5132	4.27469
1404	Na4Nb4O12	Pnma	62	orthorhombic	2.204	4.57886	-2.686	237.747	20	5.47049	5.56775	7.80565	90	90	90	15.2	12.9522	10.8	6.49307	2.8	1.16619	32.7789	30.1854	17.338	4.09524	1.802	0.346549	1.152	0.170458	191.2	50.4951	1.016	0.460678	2.568	1.08818	112.835	36.2489	4.02e-08	5.9e-08	38.8159	54.7405	1288.72	1909.29	657.054	1053.61	607.36	984.642	6.0132	10.4341
1405	Ac4Al4O12	Pnma	62	orthorhombic	4.397	8.73506	-3.532	229.626	20	5.45347	5.4579	7.71475	90	90	90	25.2	31.9587	12.8	5.03587	3.6	2.72764	60.3959	83.4105	16.926	4.0041	1.774	0.36941	1.143	0.234	191.6	54.1502	1.034	0.540503	2.604	1.03701	99.692	50.6255	5.4e-09	1.08e-08	49.4159	92.9078	1327.12	1534.91	484.174	540.108	92.76	75.7382	5.0732	6.03243
1406	Gd4Cr4O12	Pnma	62	orthorhombic	1.484	6.71193	-2.836	254.57	20	5.5238	5.64076	8.17019	90	90	90	22.4	21.7035	12.8	4.11825	3.6	2.33238	51.4489	54.7068	15.842	4.41694	1.792	0.344697	1.159	0.130859	194.8	55.9121	1.008	0.479767	2.638	0.9925	97.4456	57.0596	2.87e-07	5.14e-07	21.0159	36.7387	1347.52	1550.74	785.88	914.942	92.76	75.7382	6.2332	8.07631
1409	Gd4Al4O12	Pnma	62	orthorhombic	5.604	7.45928	-3.569	206.79	20	5.22057	5.33255	7.42808	90	90	90	20.2	21.9854	14.2	2.4	3.4	2.33238	46.4459	55.5651	16.396	3.34588	1.748	0.320899	1.106	0.227099	190.8	52.8068	0.996	0.473016	2.628	1.0025	92.938	60.2983	2.67e-07	5.21e-07	49.2159	92.9892	1317.12	1520.34	536.574	624.987	92.76	75.7382	4.2732	4.96662
1411	Nb4Ag4O12	Pnma	62	orthorhombic	1.099	6.77336	-2.007	243.954	20	5.51267	5.60894	7.88979	90	90	90	22.4	17.7381	12.8	4.35431	3.2	1.46969	49.7546	41.6113	14.636	3.3409	1.77	0.306985	1.13733	0.172284	191.8	51.2031	0.968	0.406664	2.768	0.830022	127.387	20.389	3.37e-08	5.95e-08	96.8159	167.898	1544.52	1959.4	829.866	1063.31	92.76	75.7382	7.7532	10.4453
1413	Er4Al4O12	Pnma	62	orthorhombic	6.221	7.99519	-3.602	201.244	20	5.13071	5.34146	7.34321	90	90	90	21	23.5797	15	1.26491	3.4	2.33238	48.4477	59.5577	16.108	3.08357	1.738	0.302549	1.097	0.229033	190.8	52.8068	0.986	0.455702	2.634	0.994054	92.938	60.2983	1.77e-07	3.41e-07	50.0159	92.6736	1240.72	1413.41	579.974	699.39	92.76	75.7382	6.2532	7.93896
1414	Mn4Cd4O12	Pnma	62	orthorhombic	0.229	6.81385	-1.514	209.921	20	5.25918	5.33796	7.4776	90	90	90	19.4	15.7429	13.4	3.55528	3	1.26491	43.0694	37.8087	14.486	3.94741	1.758	0.294374	1.10367	0.236996	188.8	47.5369	0.922	0.347125	2.712	0.892713	84.5856	69.0639	3.02e-07	5.7e-07	20.9759	38.1311	728.92	882.83	455.524	571.307	92.76	75.7382	4.0332	5.15256
1416	Eu4Ge4O12	Pnma	62	orthorhombic	1.817	8.54987	-2.703	211.777	20	5.32552	5.29742	7.50676	90	90	90	23.8	21.6924	14.2	2.71293	3.6	2.33238	54.5204	53.4325	18.936	5.22085	1.804	0.356011	1.1497	0.191338	192.4	54.6648	0.99	0.472694	2.704	0.937968	125.046	22.5214	0.00010018	0.00019991	14.8159	23.2312	1032.72	1224.62	494.96	540.254	92.76	75.7382	8.3332	12.2378
1417	Ca4Hf4O12	Pnma	62	orthorhombic	4.716	7.02306	-3.669	252.109	20	5.54129	5.72398	7.94838	90	90	90	23.2	24.8387	10.8	6.4	3.2	1.6	53.3132	63.2793	18.344	4.21119	1.82	0.368293	1.154	0.158947	193	52.7409	1.06	0.515364	2.53	1.11882	85.3298	68.1532	7.48e-08	1.33e-07	44.6159	78.1999	1380.72	1863.06	757.08	966.066	92.76	75.7382	6.9412	9.82271
1423	Ba4Cr4O12	Pnma	62	orthorhombic	0.258	6.36113	-2.461	247.806	20	5.60665	5.60736	7.88224	90	90	90	20.8	18.659	11.2	6.01332	3.2	1.6	47.4643	47.0446	19.494	10.1241	1.86	0.460261	1.242	0.175317	199.6	63.4558	1.056	0.563333	2.574	1.08822	100.236	52.3741	9.34e-08	1.33e-07	22.4159	36.4627	1071.52	1228.27	668.88	839.572	92.76	75.7382	5.8332	7.92801
1425	Gd4Fe4O12	Pnma	62	orthorhombic	1.638	6.73209	-2.587	257.605	20	5.53171	5.56452	8.3689	90	90	90	22.8	21.7476	13.2	3.48712	3.6	2.33238	52.2186	54.7362	15.814	4.47155	1.788	0.341667	1.1415	0.161289	194.6	55.7337	0.996	0.473016	2.672	0.96082	87.4994	65.657	2.82e-07	5.15e-07	18.2159	31.183	1385.52	1591.2	712.08	808.167	92.76	75.7382	4.8932	5.84587
1427	Ga4Bi4O12	Pnma	62	orthorhombic	3.074	9.16664	-1.728	236.728	20	5.42668	5.62076	7.76106	90	90	90	27.6	29.0971	15.2	1.16619	3.2	1.6	65.3403	74.7733	17.038	3.03307	1.7	0.229347	1.115	0.197737	192.4	54.1021	0.93	0.365294	2.83	0.75004	111.068	39.8255	2.88e-07	5.09e-07	7.41595	11.2252	916.92	1032.55	202.342	196.175	92.76	75.7382	3.4312	4.27411
1428	Ca4Cr4O12	Pnma	62	orthorhombic	0.541	4.20314	-2.611	221.354	20	5.30208	5.54015	7.53563	90	90	90	13.6	6.97424	11.2	6.01332	2.8	0.979796	28.0145	15.1903	17.102	6.00716	1.786	0.335237	1.172	0.124964	191.4	50.9886	0.992	0.453008	2.598	1.05152	97.9196	56.2522	3.22e-08	4.92e-08	58.8159	79.4222	994.32	1169.21	691.88	849.841	92.76	75.7382	5.9412	7.9604
1429	Na4Bi4O12	Pnma	62	orthorhombic	0.609	6.8045	-1.275	273.289	20	5.13323	5.47896	9.717	90	90	90	23.6	29.7227	12.8	5.9127	3	1.54919	55.9937	76.5413	19.434	2.6575	1.78	0.324654	1.195	0.0888819	196	57.1314	1.004	0.446927	2.654	1.0225	113.344	35.9185	2.7e-07	5.15e-07	29.6159	55.2784	652.72	721.817	215.934	204.835	607.36	984.642	2.8332	4.13722
1430	Ga4Bi4O12	Pnma	62	orthorhombic	1.6	7.22912	-1.645	300.175	20	5.37289	6.1589	9.0712	90	90	90	27.6	29.0971	15.2	1.16619	3.2	1.6	65.3403	74.7733	17.038	3.03307	1.7	0.229347	1.115	0.197737	192.4	54.1021	0.93	0.365294	2.83	0.75004	111.068	39.8255	2.88e-07	5.09e-07	7.41595	11.2252	916.92	1032.55	202.342	196.175	92.76	75.7382	3.4312	4.27411
1431	Ce4Ni4O12	Pnma	62	orthorhombic	0.489	5.85947	-2.011	279.775	20	5.89708	5.59109	8.48546	90	90	90	22	19.5959	12.4	4.8	3.6	2.33238	49.3615	48.2961	15.872	4.81687	1.79	0.36	1.12	0.202386	195.6	57.8743	0.986	0.473776	2.672	0.974031	119.437	30.5647	1.62e-07	2.9e-07	20.4159	35.547	1417.92	1632.25	592.08	690.337	92.76	75.7382	4.6732	6.58853
1432	Ca4Hf4O12	Pnma	62	orthorhombic	3.862	6.63276	-3.406	266.944	20	5.54231	5.69768	8.4534	90	90	90	23.2	24.8387	10.8	6.4	3.2	1.6	53.3132	63.2793	18.344	4.21119	1.82	0.368293	1.154	0.158947	193	52.7409	1.06	0.515364	2.53	1.11882	85.3298	68.1532	7.48e-08	1.33e-07	44.6159	78.1999	1380.72	1863.06	757.08	966.066	92.76	75.7382	6.9412	9.82271
1433	Ce4Al4O12	Pnma	62	orthorhombic	3.749	6.55615	-3.479	217.918	20	5.38192	5.34901	7.56975	90	90	90	19	19.5959	13	4.64758	3.4	2.33238	43.0191	48.7344	16.554	3.52166	1.764	0.350634	1.107	0.226971	192.6	55.8484	1	0.48	2.61	1.02828	105.482	43.9734	1.53e-07	2.93e-07	49.2159	92.9892	1339.12	1552.56	433.174	465.36	92.76	75.7382	3.3732	4.19513
1434	Ac4Er4O12	Pnma	62	orthorhombic	4.544	9.44703	-3.748	310.949	20	5.95984	6.12297	8.52103	90	90	90	36.2	35.1704	13	5.05964	4.6	3.2	88.4514	90.724	18.618	2.01163	1.864	0.42514	1.214	0.092	202.4	64.1891	1.14	0.617058	2.53	1.11553	91.3396	61.7228	1.72e-07	3.44e-07	5.41595	6.66843	1396.92	1606.22	657.88	753.991	92.76	75.7382	6.9132	8.40472
1435	Nd4Ga4O12	Pnma	62	orthorhombic	3.895	7.45904	-2.891	233.274	20	5.42595	5.55591	7.73812	90	90	90	23	20.5329	13.4	3.87814	3.6	2.33238	52.3926	50.4183	16.894	2.83763	1.764	0.341092	1.1633	0.201751	195.4	59.0647	1.006	0.493137	2.654	0.98569	92.8836	60.3445	1.57e-07	2.49e-07	9.21595	11.8772	1224.12	1417.37	352.862	481.75	92.76	75.7382	2.6712	3.03741
1436	Gd4Ga4O12	Pnma	62	orthorhombic	4.008	8.12149	-2.954	224.885	20	5.30536	5.57139	7.60821	90	90	90	23.8	21.9854	14.2	2.4	3.6	2.33238	54.9942	55.1996	16.756	2.66613	1.754	0.322837	1.123	0.195131	192.2	53.7788	0.994	0.472	2.668	0.964353	92.8836	60.3445	2.9e-07	5.13e-07	8.01595	11.3201	1254.12	1463.38	410.462	595.079	92.76	75.7382	3.2512	3.96344
1437	Na4Bi4O12	Pnma	62	orthorhombic	0.736	6.88119	-1.407	270.243	20	5.7055	5.81851	8.14046	90	90	90	23.6	29.7227	12.8	5.9127	3	1.54919	55.9937	76.5413	19.434	2.6575	1.78	0.324654	1.195	0.0888819	196	57.1314	1.004	0.446927	2.654	1.0225	113.344	35.9185	2.7e-07	5.15e-07	29.6159	55.2784	652.72	721.817	215.934	204.835	607.36	984.642	2.8332	4.13722
1438	Al4Bi4O12	Pnma	62	orthorhombic	2.652	8.66403	-2.319	217.694	20	5.33481	5.3915	7.56865	90	90	90	24	29.5635	15.2	1.16619	3	1.54919	56.792	76.213	16.678	3.67278	1.694	0.225175	1.098	0.228749	191	53.1413	0.932	0.366955	2.79	0.806573	111.123	39.7305	2.65e-07	5.17e-07	48.6159	93.2432	979.92	1130.75	328.454	357.026	92.76	75.7382	4.4532	5.18253
1439	Cd4Ge4O12	Pnma	62	orthorhombic	1.201	7.3757	-1.588	209.871	20	5.25866	5.32034	7.50134	90	90	90	20.8	16.473	14.8	1.6	3	1.26491	46.6098	39.5433	15.742	1.99163	1.77	0.306985	1.128	0.190725	185.6	44.0572	0.904	0.32946	2.804	0.785483	108.373	54.8547	0.000100014	0.000199993	31.4159	40.1851	880.72	1165.7	394.004	458.999	92.76	75.7382	7.7532	12.2517
1440	Eu4Ga4O12	Pnma	62	orthorhombic	0.695	6.69626	-2.389	267.506	20	5.82869	5.22529	8.78321	90	90	90	23.6	21.6204	14	2.75681	3.6	2.33238	53.937	53.2471	18.57	5.62824	1.756	0.326472	1.1477	0.195308	193	55.0781	0.996	0.475504	2.664	0.970414	109.556	40.6957	2.08e-07	3.5e-07	8.61595	11.5398	909.52	1026.04	313.262	404.45	92.76	75.7382	3.0912	3.69482
1441	Eu4Hf4O12	Pnma	62	orthorhombic	4.521	9.74481	-3.844	257.957	20	5.62313	5.7273	8.00974	90	90	90	31.8	29.2875	12.2	4.91528	4	2.52982	75.6904	73.586	18.898	5.25987	1.828	0.379125	1.1657	0.159637	197.2	58.5812	1.078	0.539793	2.566	1.07122	101.528	54.834	2.48e-07	3.52e-07	7.41595	9.48705	1389.32	1864.87	753.88	964.901	92.76	75.7382	7.0732	9.84771
1442	Ho4Al4O12	Pnma	62	orthorhombic	6.137	7.86751	-3.595	202.544	20	5.14851	5.34503	7.36019	90	90	90	20.8	23.181	14.8	1.46969	3.4	2.33238	47.982	58.6286	16.164	3.128	1.74	0.306203	1.0992	0.228431	191.6	54.1502	0.99	0.462601	2.632	0.996863	92.938	60.2983	1.68e-07	3.23e-07	50.2159	92.5989	1211.12	1374.31	566.374	675.756	92.76	75.7382	5.6732	6.96724
1443	Hf4Cd4O12	Pnma	62	orthorhombic	2.471	8.78637	-2.549	256.195	20	5.59698	5.76271	7.9431	90	90	90	28.8	26.5812	12.8	4.66476	3.4	1.74356	67.7798	66.7717	15.704	2.03294	1.794	0.335952	1.144	0.161071	190.4	49.4959	0.992	0.43774	2.666	0.955146	84.8558	68.7343	8.2e-08	1.32e-07	24.0159	37.5611	1237.32	1856.16	652.924	949.799	92.76	75.7382	6.4932	9.7906
1444	Na4As4O12	Pnma	62	orthorhombic	1.08	4.99397	-1.53	194.065	20	5.15878	5.15634	7.29557	90	90	90	13.6	9.76934	12.8	5.9127	2.6	0.8	29.1819	23.0295	17.762	3.45996	1.736	0.296014	1.12	0.233238	177.6	39.0774	0.944	0.393223	2.686	1.0045	110.673	37.9267	7.58e-08	1.29e-07	38.0159	54.5416	462.72	464.104	325.054	401.585	947.36	1009.41	6.1932	10.7928
1446	Lu4Al4O12	Pnma	62	orthorhombic	6.174	8.42913	-3.622	196.958	20	5.07777	5.32568	7.28326	90	90	90	21.6	24.7758	15.6	1.35647	3.4	2.33238	49.9893	62.6334	15.972	2.99043	1.728	0.284422	1.0912	0.231015	187.6	47.5924	0.98	0.445421	2.64	0.985677	99.5	50.8763	1.21e-07	2.3e-07	50.2159	92.5989	1347.52	1565.01	604.574	742.759	92.76	75.7382	6.6732	8.67156
1447	K4Nb4O12	Pnma	62	orthorhombic	1.536	4.57074	-2.687	261.579	20	5.69534	5.69968	8.05809	90	90	90	16.8	12.8281	10.8	6.49307	3	1.26491	36.0006	29.8262	21.77	12.3468	1.898	0.496806	1.224	0.225708	195.8	56.3503	1.096	0.575555	2.546	1.12167	111.939	37.7453	4.54e-08	6.07e-08	30.8159	40.4175	1263.92	1911.66	650.186	1055.56	537.36	844.944	5.9592	10.4523
1449	Gd4Mn4O12	Pnma	62	orthorhombic	0.346	6.72746	-2.667	256.887	20	5.68024	5.66066	7.9893	90	90	90	22.6	21.7219	13	3.79473	3.6	2.33238	52.0372	54.7253	15.866	4.37016	1.79	0.343162	1.10067	0.237245	194.8	55.9121	1.006	0.478565	2.616	1.0149	84.5856	69.0639	5.5e-07	6.75e-07	3.77595	4.7022	1225.52	1440.42	653.68	733.772	92.76	75.7382	4.7732	5.66517
1453	Ac4Fe4O12	Pnma	62	orthorhombic	0.906	8.66037	-2.731	253.744	20	5.65501	5.62988	7.97008	90	90	90	27.8	31.3841	11.8	5.38145	3.8	2.71293	66.1686	81.883	16.344	5.04475	1.814	0.384895	1.1785	0.163	195.4	56.9547	1.034	0.540503	2.648	0.997826	94.2534	57.5445	2e-08	4e-08	18.4159	31.1393	1395.52	1604.7	659.68	756.726	92.76	75.7382	5.6932	6.70112
1454	Li4Nb4O12	Pnma	62	orthorhombic	2.594	5.12127	-2.634	191.752	20	4.77197	5.13926	7.81883	90	90	90	13.6	13.8362	10.8	6.49307	2.6	1.2	29.5691	31.8624	15.186	2.75119	1.712	0.261258	1.1	0.197585	183.6	43.4401	0.956	0.395656	2.578	1.07321	114.188	34.0442	4.94e-08	6.31e-08	27.8159	35.4185	1380.52	1911.74	673.618	1049.62	737.36	1244.26	6.0932	10.4092
1456	Ce4Ga4O12	Pnma	62	orthorhombic	3.706	7.18847	-2.853	238.242	20	5.5066	5.54512	7.80232	90	90	90	22.6	19.8151	13	4.64758	3.6	2.33238	51.5674	48.9198	16.914	2.86384	1.77	0.352136	1.124	0.194895	194	56.7239	0.998	0.479016	2.65	0.991847	105.428	44.0523	1.76e-07	2.87e-07	8.01595	11.3201	1276.12	1497.75	307.062	392.416	92.76	75.7382	2.3512	2.60788
1460	K4Np4O12	Pnma	62	orthorhombic	1.897	6.73538	-2.884	319.611	20	6.07206	6.10108	8.62739	90	90	90	27.2	33.1747	11.2	6.17738	3.8	2.71293	64.8193	86.5539	21.922	12.2152	1.94	0.52684	1.26	0.164438	198.6	59.5302	1.144	0.620503	2.5	1.16386	94.2626	59.2227	2.55e-07	4.73e-07	21.2159	39.4599	1115.12	1620.52	282.186	332.33	537.36	844.944	2.5992	3.78939
1463	Cs4Nb4O12	Pm-3m	221	cubic	1.544	6.40107	-2.431	284.123	20	5.85648	5.85782	8.28196	90	90	90	24	20.0898	10.8	6.49307	3.4	1.74356	54.762	49.1305	26.77	22.2293	2.034	0.743333	1.282	0.314223	210.8	79.946	1.172	0.701267	2.54	1.13093	111.363	38.7201	7.24e-08	9.05e-08	18.0159	22.7558	1246.32	1914.12	643.198	1057.73	480.36	731.275	5.9112	10.4694
[truncated: 497 more rows]
[truncated: 16 more columns]
