# Supplementary material for: A progressive learning method for predicting the band gap of ABO3 perovskites using an instrumental variable
Source: Royal Society of Chemistry journal article supplement (doi:10.1039/c9tc06632b), 2020-01-01
Supplement: c9tc06632b3.xlsx [file c9tc06632b3.xlsx]

## Sheet: Supplementary Data3-Element Inf
Supplementary Data3-Element Information
num	symbol	number	row	group	atomic_mass	molar_volume	atomic_radius	ionic_radius	covalent_radius	van_der_waals_radius	electron_negativity	electron_affinity	electrical_resistivity	thermal_cond	boiling_point	melting_point	Tc	enthalpy_of_fusion	first_ionization_energy	second_ionization_energy	s	p	d	f	Omax	Omin	valance	block	electron_shell	metal	noble_gas	alkali_metal	rare_earth_metal	Over_metal	Lanthanide_metals	actinoid	Halogen	alkaline	poissons_ratio	bulk_modulus	youngs_modul	rigidity_modul	thermal_expansion
0	H	1	1	1	1.00794	11.42	1.008	0	0.32	120	2.2	72.769	0	0.1805	20.28	14.01	33	0.558	1312	1312	1	0	0	0	1	-1	1	s	1	0	0	0	0	0	0	0	0	0
1	He	2	1	18	4.0026	21	1.4	0	0.37	140	4.16	0	0	0.1513	4.22	0.95	5.19	0.02	2372	5250	2	0	0	0	0	0	0	s	2	0	1	0	0	0	0	0	0	0
2	Li	3	2	1	6.941	13.02	1.82	0.9	1.3	212	0.98	59.633	9.5e-08	85	1615	453.69	3223	3	520	7298	1	0	0	0	1	1	1	s	2.1	1	0	1	0	0	0	0	0	0		11	4.9	4.2	4.6e-05
3	Be	4	2	2	9.01218	4.85	1.53	0.59	0.99	198	1.57	0	3.8e-08	190	2742	1560	0	7.95	899.5	1757.1	2	0	0	0	2	2	2	s	2.2	1	0	0	0	0	0	0	0	1	0.032	130	287	132	1.13e-05
4	B	5	2	13	10.811	4.39	1.92	0.41	0.84	192	2.04	26.989	1000000000000	27	4200	2349	0	50	800.6	2427.1	2	1	0	0	3	1	3	p	2.3	0	0	0	0	0	0	0	0	0		320			6e-06
5	C	6	2	14	12.0107	5.29	1.7	0.3	0.75	177	2.55	121.776	1e-05	140	4300	3800	0	117	1086	2352	2	2	0	0	4	-4	4	p	2.4	0	0	0	0	0	0	0	0	0		33			7.1e-06
6	N	7	2	15	14.0067	13.54	1.55	0.63	0.71	166	3.04	0	0	0.02583	77.36	63.05	126.2	0.36	1402	2856	2	3	0	0	5	-3	3	p	2.5	0	0	0	0	0	0	0	0	0
7	O	8	2	16	15.9994	17.36	1.52	1.26	0.64	150	3.44	140.976	0	0.02658	90.2	54.8	154.6	0.222	1313	3388	2	4	0	0	2	-2	2	p	2.6	0	0	0	0	0	0	0	0	0
8	F	9	2	17	18.9984	11.2	1.47	0.705	0.6	146	3.98	328.165	0	0.0277	85.03	53.53	144	0.26	1681	3374	2	5	0	0	-1	-1	1	p	2.7	0	0	0	0	0	0	0	1	0
9	Ne	10	2	18	20.1797	13.23	1.54	0	0.62	158	4.79	0	0	0.0491	27.07	24.56	44.4	0.34	2080	3952	2	6	0	0	0	0	0	p	2.8	0	1	0	0	0	0	0	0	0
10	Na	11	3	1	22.9898	23.78	2.27	1.16	1.6	250	0.93	52.867	4.9e-08	140	1156	370.87	2573	2.6	495.8	4562	1	0	0	0	1	-1	1	s	2.8.1	1	0	1	0	0	0	0	0	0		6.3	10	3.3	7.1e-05
11	Mg	12	3	2	24.305	14	1.73	0.86	1.4	251	1.31	0	4.4e-08	160	1363	923	0	8.7	737.7	1450.7	2	0	0	0	2	1	2	s	2.8.2	1	0	0	0	0	0	0	0	1	0.29	45	45	17	8.2e-06
12	Al	13	3	13	26.9815	10	1.84	0.675	1.24	225	1.61	41.762	2.7e-08	235	2792	933.47	0	10.7	577.5	1816.7	2	1	0	0	3	1	3	p	2.8.3	1	0	0	0	0	0	0	0	0	0.35	76	70	26	2.31e-05
13	Si	14	3	14	28.0855	12.06	2.1	0.54	1.14	219	1.98	133.068	0.001	150	3173	1687	0	50.2	786.5	1577.1	2	2	0	0	4	-4	4	p	2.8.4	0	0	0	0	0	0	0	0	0		100	47		2.6e-06
14	P	15	3	15	30.9738	17.02	1.8	0.55	1.09	190	2.19	72.037	1e-07	0.236	550	317	994	0.64	1011	1907	2	3	0	0	5	-3	5	p	2.8.5	0	0	0	0	0	0	0	0	0		11
15	S	16	3	16	32.065	15.53	1.8	0.88	1.04	189	2.58	200.41	1e+23	0.205	717.87	388.36	1314	1.73	999.6	2252	2	4	0	0	6	-2	6	p	2.8.6	0	0	0	0	0	0	0	0	0		7.7
16	Cl	17	3	17	35.453	17.39	1.75	0.78	1	182	3.16	348.575	10000000000	0.0089	239.11	171.6	417	3.2	1251.2	2298	2	5	0	0	7	-1	5	p	2.8.7	0	0	0	0	0	0	0	1	0		1.1
17	Ar	18	3	18	39.948	22.56	1.88	0	1.01	183	3.24	0	0	0.01772	87.3	83.8	150.8	1.18	1520	2665.8	2	6	0	0	0	0	0	p	2.8.8	0	1	0	0	0	0	0	0	0
18	K	19	4	1	39.0983	45.94	2.75	1.52	2	273	0.82	48.385	7.5e-08	100	1032	336.53	2223	2.33	418.8	3052	1	0	0	0	1	-1	1	s	2.8.8.1	1	0	1	0	0	0	0	0	0		3.1		1.3
19	Ca	20	4	2	40.078	26.2	2.31	1.14	1.74	262	1.01	2.37	3.4e-08	200	1757	1115	0	8.54	589.8	1145.4	2	0	0	0	2	2	2	s	2.8.8.2	1	0	0	0	0	0	0	0	1	0.31	17	20	7.4	2.23e-05
20	Sc	21	4	3	44.9559	15	2.15	0.885	1.59	258	1.36	18.1	5.5e-07	16	3103	1814	0	16	633	1235	2	0	1	0	3	1	3	d	2.8.9.2	1	0	0	0	1	0	0	0	0	0.28	57	74	29	1.02e-05
21	Ti	22	4	4	47.867	10.64	2.11	0.851667	1.48	246	1.54	7.6	4e-07	22	3560	1941	0	18.7	658.8	1309	2	0	2	0	4	-1	4	d	2.8.10.2	1	0	0	0	1	0	0	0	0	0.32	110	116	44	8.6e-06
22	V	23	4	5	50.9415	8.32	2.07	0.7775	1.44	242	1.63	50.6	2e-07	31	3680	2183	0	22.8	650.9	1414	2	0	3	0	5	-1	5	d	2.8.11.2	1	0	0	0	1	0	0	0	0	0.37	160	128	47	8.4e-06
23	Cr	24	4	6	51.9961	7.23	2.06	0.94	1.3	245	1.66	64.3	1.27e-07	94	2944	2180	0	20.5	652.9	1590.6	1	0	5	0	6	-2	6	d	2.8.13.1	1	0	0	0	1	0	0	0	0	0.21	160	279	115	4.9e-06
24	Mn	25	4	7	54.938	7.35	2.05	0.648333	1.29	245	1.55	0	1.44e-06	7.8	2334	1519	0	13.2	717.3	1509	2	0	5	0	7	-3	4	d	2.8.12.2	1	0	0	0	1	0	0	0	0		120	198		2.17e-05
25	Fe	26	4	8	55.845	7.09	2.04	0.8525	1.24	244	1.83	14.569	1e-07	80	3134	1811	0	13.8	762.5	1561.9	2	0	6	0	6	-2	3	d	2.8.14.2	1	0	0	0	1	0	0	0	0	0.29	170	211	82	1.18e-05
26	Co	27	4	9	58.9332	6.67	2	0.768333	1.18	240	1.88	63.873	6e-08	100	3200	1768	0	16.2	760.4	1648	2	0	7	0	5	-1	4	d	2.8.15.2	1	0	0	0	1	0	0	0	0	0.31	180	209	75	1.3e-05
27	Ni	28	4	10	58.6934	6.59	1.97	0.74	1.17	240	1.92	111.537	7.2e-08	91	3186	1728	0	17.2	737.1	1753	2	0	8	0	4	-1	2	d	2.8.16.2	1	0	0	0	1	0	0	0	0	0.31	180	200	76	1.34e-05
28	Cu	29	4	11	63.546	7.11	1.96	0.82	1.22	238	1.9	119.159	1.72e-08	400	3200	1357.77	0	13.1	745.5	1957.9	1	0	10	0	4	1	2	d	2.8.18.1	1	0	0	0	1	0	0	0	0	0.34	140	130	48	1.65e-05
29	Zn	30	4	12	65.409	9.16	2.01	0.88	1.2	239	1.65	0	6e-08	120	1180	692.68	0	7.35	906.4	1733.3	2	0	10	0	2	1	2	d	2.8.18.2	1	0	0	0	1	0	0	0	0	0.25	70	108	43	3.02e-05
30	Ga	31	4	13	69.723	11.8	1.87	0.76	1.23	232	1.81	41.49	1.4e-07	29	2477	302.91	0	5.59	578.8	1979.3	2	1	10	0	3	1	3	p	2.8.18.3	1	0	0	0	0	0	0	0	0					0.00012
31	Ge	32	4	14	72.64	13.63	2.11	0.77	1.2	229	2.01	118.939	0.0005	60	3093	1211.4	0	31.8	762	1537.5	2	2	10	0	4	-4	4	p	2.8.18.4	1	0	0	0	0	0	0	0	0					6e-06
32	As	33	4	15	74.9216	12.95	1.85	0.66	1.2	188	2.18	77.57	3.3e-07	50	887	1090	1700	27.7	947	1798	2	3	10	0	5	-3	5	p	2.8.18.5	0	0	0	0	0	0	0	0	0		22	8
33	Se	34	4	16	78.96	16.42	1.9	1.01333	1.18	182	2.55	194.965	1e-08	0.52	958	494	1766	5.4	941	2045	2	4	10	0	6	-2	6	p	2.8.18.6	0	0	0	0	0	0	0	0	0	0.33	8.3	10	3.7
34	Br	35	4	17	79.904	19.78	1.85	0.8825	1.17	186	2.96	324.537	1e+18	0.12	332	265.8	586	5.8	1139.9	2103	2	5	10	0	7	-1	5	p	2.8.18.7	0	0	0	0	0	0	0	1	0		1.9
35	Kr	36	4	18	83.798	27.99	2.02	0	1.16	225	3	0	0	0.00943	119.93	115.79	209.4	1.64	1350.8	2350.4	2	6	10	0	0	0	2	p	2.8.18.8	0	1	0	0	0	0	0	0	0
36	Rb	37	5	1	85.4678	55.76	3.03	1.66	2.15	321	0.82	46.884	1.33e-07	58	961	312.46	2093	2.19	403	2633	1	0	0	0	1	1	1	s	2.8.18.8.1	1	0	1	0	0	0	0	0	0		2.5	2.4
37	Sr	38	5	2	87.62	33.94	2.49	1.32	1.9	284	0.95	4.631	1.35e-07	35	1655	1050	0	8	549.5	1064.2	2	0	0	0	2	2	2	s	2.8.18.8.2	1	0	0	0	0	0	0	0	1	0.28			6.1	2.25e-05
38	Y	39	5	3	88.9059	19.88	2.32	1.04	1.76	275	1.22	29.621	6e-07	17	3609	1799	0	11.4	600	1180	2	0	1	0	3	1	3	d	2.8.18.9.2	1	0	0	0	1	0	0	0	0	0.24	41	64	26	1.06e-05
39	Zr	40	5	4	91.224	14.02	2.23	0.86	1.64	252	1.33	41.103	4.33e-07	23	4682	2128	0	21	640	1270	2	0	2	0	4	1	4	d	2.8.18.10.2	1	0	0	0	1	0	0	0	0	0.34		68	33	5.7e-06
40	Nb	41	5	5	92.9064	10.83	2.18	0.82	1.56	256	1.59	88.381	1.52e-07	54	5017	2750	0	26.8	652.1	1380	1	0	4	0	5	-1	5	d	2.8.18.12.1	1	0	0	0	1	0	0	0	0	0.4	170	105	38	7.3e-06
41	Mo	42	5	6	95.94	9.38	2.17	0.775	1.46	245	2.16	72.171	5.5e-08	139	4912	2896	0	36	684.3	1560	1	0	5	0	6	-2	6	d	2.8.18.13.1	1	0	0	0	1	0	0	0	0	0.31	230	329	20	4.8e-06
42	Tc	43	5	7	98	8.63	2.16	0.741667	1.38	244	1.91	53.07	2.2e-07	51	4538	2430	0	23	702	1470	2	0	5	0	7	-3	6	d	2.8.18.14.1	1	0	0	0	1	0	0	0	0
43	Ru	44	5	8	101.07	8.17	2.13	0.661	1.36	246	2.2	101.31	7.1e-08	120	4423	2607	0	25.7	710.2	1620	1	0	7	0	8	-2	6	d	2.8.18.15.1	1	0	0	0	1	0	0	0	0	0.3	220	447	173	6.4e-06
44	Rh	45	5	9	102.906	8.28	2.1	0.745	1.34	244	2.28	109.704	4.3e-08	150	3968	2237	0	21.7	719.7	1740	1	0	8	0	6	-1	6	d	2.8.18.16.1	1	0	0	0	1	0	0	0	0	0.26	380	275	150	8.2e-06
45	Pd	46	5	10	106.42	8.56	2.1	0.84625	1.3	215	2.2	53.225	1.08e-07	72	3236	1828.05	0	16.7	804.4	1870	0	0	10	0	4	2	4	d	2.8.18.18.0	1	0	0	0	1	0	0	0	0	0.39	180	121	44	1.18e-05
46	Ag	47	5	11	107.868	10.27	2.11	1.08667	1.36	253	1.93	125.624	1.63e-08	430	2435	1234.93	0	11.3	731	2070	1	0	10	0	3	1	1	d	2.8.18.18.1	1	0	0	0	1	0	0	0	0	0.37	100	83	30	1.89e-05
47	Cd	48	5	12	112.411	13	2.18	1.09	1.4	249	1.69	0	7e-08	97	1040	594.22	0	6.3	867.8	1631.4	2	0	10	0	2	1	2	d	2.8.18.18.2	1	0	0	0	1	0	0	0	0	0.3	42	50	19	3.08e-05
48	In	49	5	13	114.818	15.76	1.93	0.94	1.42	243	1.78	28.9	8e-08	82	2345	429.75	0	3.26	558.3	1820.7	2	1	10	0	3	1	3	p	2.8.18.18.3	1	0	0	0	0	0	0	0	0			11		3.21e-05
49	Sn	50	5	14	118.71	16.29	2.17	0.83	1.4	242	1.96	107.298	1.15e-07	67	2875	505.08	0	7	708.6	1411.8	2	2	10	0	4	-4	4	p	2.8.18.18.4	1	0	0	0	0	0	0	0	0	0.36	58	50	18	2.2e-05
50	Sb	51	5	15	121.76	18.19	2.06	0.83	1.4	247	2.05	100.924	4e-07	24	1860	903.78	0	19.7	834	1594.9	2	3	10	0	5	-3	5	p	2.8.18.18.5	1	0	0	0	0	0	0	0	0		42	55	20	1.1e-05
51	Te	52	5	16	127.6	20.46	2.06	1.29333	1.37	199	2.12	190.161	0.0001	3	1261	722.66	0	17.5	869.3	1790	2	4	10	0	6	-2	6	p	2.8.18.18.6	0	0	0	0	0	0	0	0	0		65	43	16
52	I	53	5	17	126.904	25.72	1.98	1.27333	1.36	204	2.66	295.152	1000000000000000	0.449	457.4	386.85	819	7.76	1008.4	1845.9	2	5	10	0	7	-1	7	p	2.8.18.18.7	0	0	0	0	0	0	0	1	0		7.7
53	Xe	54	5	18	131.293	35.92	2.16	0.62	1.36	206	2.6	0	0	0.00565	165.1	161.4	289.7	2.3	1170.4	2046.4	2	6	10	0	0	0	6	p	2.8.18.18.8	0	1	0	0	0	0	0	0	0
54	Cs	55	6	1	132.905	70.94	3.43	1.81	2.38	348	0.79	45.505	2.1e-07	36	944	301.59	1938	2.09	375.7	2234.3	1	0	0	0	1	1	1	s	2.8.18.18.8.1	1	0	1	0	0	0	0	0	0		1.6	1.7
55	Ba	56	6	2	137.327	38.16	2.68	1.49	2.06	303	0.89	13.954	3.4e-07	18	2143	1000	0	8	502.9	965.2	2	0	0	0	2	2	2	s	2.8.18.18.8.2	1	0	0	0	0	0	0	0	1		9.6	13	4.9	2.06e-05
56	La	57	8	3	138.905	22.39	2.43	1.172	1.94	298	1.1	45.35	6.15e-07	13	3743	1193	0	6.2	538.1	1067	2	0	1	0	3	2	3	f	2.8.18.18.9.2	1	0	0	1	1	1	0	0	0	0.28	28	37	14	1.21e-05
57	Ce	58	8	4	140.116	20.69	2.42	1.08	1.84	288	1.12	62.72	7.4e-07	11	3633	1068	0	5.5	534.4	1050	2	0	1	1	4	2	4	f	2.8.18.19.9.2	1	0	0	1	1	1	0	0	0	0.24	22	34	14	6.3e-06
58	Pr	59	8	5	140.908	20.8	2.4	1.06	1.9	292	1.13	92.819	7e-07	13	3563	1208	0	6.9	527	1020	2	0	0	3	4	2	4	f	2.8.18.21.8.2	1	0	0	1	1	1	0	0	0	0.28	29	37	15	6.7e-06
59	Nd	60	8	6	144.242	20.59	2.39	1.2765	1.88	295	1.14	0	6.43e-07	17	3373	1297	0	7.1	533.1	1040	2	0	0	4	3	2	3	f	2.8.18.22.8.2	1	0	0	1	1	1	0	0	0	0.28	32	41	16	9.6e-06
60	Pm	61	8	7	145	20.23	2.38	1.11	1.86	290	1.13	0	7.5e-07	15	3273	1373	0	7.7	540	1050	2	0	0	5	3	3	3	f	2.8.18.23.8.2	1	0	0	1	1	1	0	0	0	0.28	33	46	18	1.1e-05
61	Sm	62	8	8	150.36	19.98	2.36	1.229	1.85	287	1.17	0	9.4e-07	13	2076	1345	0	8.6	544.5	1070	2	0	0	6	3	2	3	f	2.8.18.24.8.2	1	0	0	1	1	1	0	0	0	0.27	38	50	20	1.27e-05
62	Eu	63	8	9	151.964	28.97	2.35	1.1985	1.83	283	1.19	83.363	9e-07	14	1800	1099	0	9.2	547.1	1085	2	0	0	7	3	2	3	f	2.8.18.25.8.2	1	0	0	1	1	1	0	0	0	0.15	8.3	18	7.9	3.5e-05
63	Gd	64	8	10	157.25	19.9	2.34	1.075	1.82	279	1.21	0	1.31e-06	11	3523	1585	0	10	593.4	1170	2	0	1	7	3	1	3	f	2.8.18.25.9.2	1	0	0	1	1	1	0	0	0	0.26	38	55	22	9.4e-06
64	Tb	65	8	11	158.925	19.3	2.33	0.9815	1.81	287	1.13	0	1.15e-06	11	3503	1629	0	10.8	565.8	1110	2	0	0	9	4	1	3	f	2.8.18.27.8.2	1	0	0	1	1	1	0	0	0	0.26	38.7	56	22	1.03e-05
65	Dy	66	8	12	162.5	19.01	2.31	1.131	1.8	281	1.22	0	9.26e-07	11	2840	1680	0	11.1	573	1130	2	0	0	10	3	2	3	f	2.8.18.28.8.2	1	0	0	1	1	1	0	0	0	0.25	41	61	25	9.9e-06
66	Ho	67	8	13	164.93	18.74	2.3	1.041	1.79	283	1.23	0	8.14e-07	16	2993	1734	0	17	581	1140	2	0	0	11	3	3	3	f	2.8.18.29.8.2	1	0	0	1	1	1	0	0	0	0.23	40	65	26	1.12e-05
67	Er	68	8	14	167.259	18.46	2.29	1.03	1.77	279	1.24	0	8.6e-07	15	3141	1802	0	19.9	589.3	1150	2	0	0	12	3	3	3	f	2.8.18.30.8.2	1	0	0	1	1	1	0	0	0	0.24	44	70	28	1.22e-05
68	Tm	69	8	15	168.934	19.1	2.27	1.095	1.77	280	1.25	99.283	6.76e-07	17	2223	1818	0	16.8	596.7	1160	2	0	0	13	3	2	3	f	2.8.18.31.8.2	1	0	0	1	1	1	0	0	0	0.21	45	74	31	1.33e-05
69	Yb	70	8	16	173.04	24.84	2.26	1.084	1.78	274	1.26	-1.93	2.5e-07	39	1469	1097	0	7.7	603.4	1174.8	2	0	0	14	3	2	3	f	2.8.18.32.8.2	1	0	0	1	1	1	0	0	0	0.21	31	24	9.9	2.63e-05
70	Lu	71	8	17	174.967	17.78	2.24	1.001	1.74	263	1.27	32.81	5.8e-07	16	3675	1925	0	22	523.5	1340	2	0	1	14	3	3	3	d	2.8.18.32.9.2	1	0	0	1	1	1	0	0	0	0.26	48	69	27	9.9e-06
71	Hf	72	6	4	178.49	13.44	2.23	0.85	1.64	253	1.32	1.351	3.4e-07	23	4876	2506	0	25.5	658.5	1440	2	0	2	14	4	2	4	d	2.8.18.32.10.2	1	0	0	0	1	0	0	0	0	0.37	110	78	30	5.9e-06
72	Ta	73	6	5	180.948	10.85	2.22	0.82	1.58	257	1.51	31.068	1.35e-07	57	5731	3290	0	36	761	1500	2	0	3	14	5	-1	5	d	2.8.18.32.11.2	1	0	0	0	1	0	0	0	0	0.34	200	186	69	6.3e-06
73	W	74	6	6	183.84	9.47	2.18	0.766667	1.5	249	2.36	78.757	5.4e-08	170	5828	3695	0	35	770	1700	2	0	4	14	6	-2	6	d	2.8.18.32.12.2	1	0	0	0	1	0	0	0	0	0.28	310	411	161	4.5e-06
74	Re	75	6	7	186.207	8.86	2.16	0.7125	1.41	248	1.93	14.47	1.8e-07	48	5869	3459	0	33	760	1260	2	0	5	14	7	-3	7	d	2.8.18.32.13.2	1	0	0	0	1	0	0	0	0	0.3	370	463	178	6.2e-06
75	Os	76	6	8	190.23	8.42	2.13	0.673	1.36	241	2.18	106.1	8.1e-08	88	5285	3306	0	31	840	1600	2	0	6	14	8	-2	6	d	2.8.18.32.14.2	1	0	0	0	1	0	0	0	0	0.25			222	5.1e-06
76	Ir	77	6	9	192.217	8.52	2.13	0.765	1.32	229	2.2	150.884	4.7e-08	150	4701	2739	0	26	880	1600	2	0	7	14	6	-3	6	d	2.8.18.32.15.2	1	0	0	0	1	0	0	0	0	0.26	320	528	210	6.4e-06
77	Pt	78	6	10	195.084	9.09	2.13	0.805	1.3	232	2.28	205.321	1.06e-07	72	4098	2041.4	0	20	870	1791	1	0	9	14	6	-2	6	d	2.8.18.32.17.1	1	0	0	0	1	0	0	0	0	0.38	230	168	61	8.8e-06
78	Au	79	6	11	196.967	10.21	2.14	1.07	1.3	245	2.54	222.749	2.2e-08	320	3129	1337.33	0	12.5	890	1980	1	0	10	14	5	-1	5	d	2.8.18.32.18.1	1	0	0	0	1	0	0	0	0	0.44	220	78	27	1.42e-05
79	Hg	80	6	12	200.59	14.09	2.23	1.245	1.32	247	2	0	9.6e-07	8.3	629.88	234.32	1750	2.29	1007.1	1810	2	0	10	14	4	1	2	d	2.8.18.32.18.2	1	0	0	0	1	0	0	0	0		25
80	Tl	81	6	13	204.383	17.22	1.96	1.3325	1.44	260	1.62	36.375	1.5e-07	46	1746	577	0	4.2	589.4	1971	2	1	10	14	3	1	3	p	2.8.18.32.18.3	1	0	0	0	0	0	0	0	0	0.45	43	8	2.8	2.99e-05
81	Pb	82	6	14	207.2	18.26	2.02	1.1225	1.45	254	2.33	35.121	2.1e-07	35	2022	600.61	0	4.77	715.6	1450.5	2	2	10	14	4	-4	4	p	2.8.18.32.18.4	1	0	0	0	0	0	0	0	0	0.44	46	16	5.6	2.89e-05
82	Bi	83	6	15	208.98	21.31	2.07	1.035	1.5	280	2.02	90.924	1.3e-06	8	1837	544.4	0	10.9	703	1610	2	3	10	14	5	-3	5	p	2.8.18.32.18.5	1	0	0	0	0	0	0	0	0	0.33	31	32	12	1.34e-05
83	Po	84	6	16	210	22.97	1.97	0.945	1.42	293	1.99	183.3	4e-07	20	1235	527	0	13	812.1		2	4	10	14	6	-2	6	p	2.8.18.32.18.6	1	0	0	0	0	0	0	0	0
84	At	85	6	17	210	33	2.02	0.76	1.48	288	2.22	270.2	0	2	575	575	0	6	920		2	5	10	14	5	-1	7	p	2.8.18.32.18.7	0	0	0	0	0	0	0	1	0
85	Rn	86	6	18	220	50.5	2.2	0	1.46	271	2.43	0	0	0.00361	211.3	202	377	3	1037		2	6	10	14	0	0	6	p	2.8.18.32.18.8	0	1	0	0	0	0	0	0	0
86	Fr	87	7	1	223	77	3.48	1.94	2.42	282	0.71	44.38	0	15	300	300	0	2	380		1	0	0	0	1	1	1	s	2.8.18.32.18.8.1	1	0	1	0	0	0	0	0	0
87	Ra	88	7	2	226	41.09	2.83	1.62	2.11	281	0.92	9.65	1e-06	19	2010	973	0	8	509.3	979	2	0	0	0	2	2	2	s	2.8.18.32.18.8.2	1	0	0	0	0	0	0	0	1
88	Ac	89	9	3	227	22.55	2.47	1.26	2.01	283	1.09	33.77	0	12	3573	1323	0	14	499	1170	2	0	1	0	3	3	3	f	2.8.18.32.18.9.2	1	0	0	1	1	0	1	0	0
89	Th	90	9	4	232.038	19.8	2.45	1.08	1.9	305	1.32	0	1.5e-07	54	5093	2115	0	16	587	1110	2	0	2	0	4	2	4	f	2.8.18.32.18.10.2	1	0	0	1	1	0	1	0	0	0.27	54	79	31	1.1e-05
90	Pa	91	9	5	231.036	15.18	2.43	1.04	1.84	340	1.54	0	1.8e-07	47	1841	1841	0	15	568		2	0	1	2	5	3	5	f	2.8.18.32.20.9.2	1	0	0	1	1	0	1	0	0
91	U	92	9	6	238.029	12.49	2.41	0.99125	1.83	305	1.7	0	2.8e-07	27	4200	1405.3	0	14	597.6	1420	2	0	1	3	6	3	6	f	2.8.18.32.21.9.2	1	0	0	1	1	0	1	0	0	0.23	100	208	111	1.39e-05
92	Np	93	9	7	237	11.59	2.39	1	1.8	270	1.36	0	1.2e-06	6	4273	910	0	10	604.5		2	0	1	4	7	3	6	f	2.8.18.32.22.9.2	1	0	0	1	1	0	1	0	0
93	Pu	94	9	8	244	12.29	2.43	0.9675	1.8	0	1.3	0	1.5e-06	6	3503	912.5	0	2.8	584.7		2	0	0	6	7	3	6	f	2.8.18.32.24.8.2	1	0	0	1	1	0	1	0	0	0.21		96	43
94	Am	95	9	9	243	17.63	2.44	1.16833	1.73	0	1.3	0	0	10	2880	1449	0	0	578		2	0	0	7	6	2	4	f	2.8.18.32.25.8.2	1	0	0	1	1	0	1	0	0
95	Cm	96	9	10	247	18.05	2.45	1.05	1.68	0	1.3	0	0	8.8	3383	1613	0	0	581		2	0	1	7	4	3	4	f	2.8.18.32.25.9.2	1	0	0	1	1	0	1	0	0
96	Bk	97	9	11	247	16.84	2.44	1.035	1.68	0	1.3	0	0	10	1259	1259	0	0	601		2	0	0	9	4	3	4	f	2.8.18.32.27.8.2	1	0	0	1	1	0	1	0	0
97	Cf	98	9	12	251	16.5	2.45	1.0255	1.68	0	1.3	0	0	10	1173	1173	0	0	608	1160	2	0	0	10	4	2	4	f	2.8.18.32.28.8.2	1	0	0	1	1	0	1	0	0
98	Es	99	9	13	252	28.52	2.45	0	1.65	0	1.3	0	0	10	1133	1133	0	0	619		2	0	0	11	3	2	4	f	2.8.18.32.29.8.2	1	0	0	1	1	0	1	0	0
99	Fm	100	9	14	257	0	2.45	0	1.67	0	1.3	0	0	10	1800	1800	0	0	627		2	0	0	12	3	2	3	f	2.8.18.32.30.8.2	1	0	0	1	1	0	1	0	0
100	Md	101	9	15	258	0	2.46	0	1.73	0	1.33	0	0	10	1100	1100	0	0	635		2	0	0	13	3	2	3	f	2.8.18.32.31.8.2	1	0	0	1	1	0	1	0	0
101	No	102	9	16	259	0	2.46	1.24	1.76	0	1.36	0	0	10	1100	1100	0	0	642		2	0	0	14	3	2	3	f	2.8.18.32.32.8.2	1	0	0	1	1	0	1	0	0
102	Lr	103	9	17	262	0	2.46	0	1.61	0	1.34	0	0	10	1900	1900	0	0	472.8		2	1	0	14	3	3	3	d	2.8.18.32.32.9.2	1	0	0	1	1	0	1	0	0
103	Rf	104	7	4	267	16	0	0	1.57	0	0	0	0	23	0	0	0	0	579		2	0	2	14			4	d	2.8.18.32.32.10.2	1	0	0		1	0	0	0			Gpa	GPa	GPa	K^-1
104	Db	105	7	5	268	12	0	0	1.49	0	0	0	0	58	0	0	0	0	0		2	0	3	14			5	d	2.8.18.32.32.11.2	1	0	0		1	0	0	0
105	Sg	106	7	6	269	12	0	0	1.43	0	0	0	0	19	0	0	0	0	0		2	0	4	14			6	d	2.8.18.32.32.12.2	1	0	0		1	0	0	0
106	Bh	107	7	7	270	10	0	0	1.41	0	0	0	0	0	0	0	0	0	0		2	0	5	14			7	d	2.8.18.32.32.13.2	1	0	0		1	0	0	0
107	Hs	108	7	8	269	10	0	0	1.34	0	0	0	0	0	0	0	0	0	0		2	0	6	14				d	2.8.18.32.32.14.2	1	0	0		1	0	0	0
108	Mt	109	7	9	278	10	0	0	1.29	0	0	0	0	0	0	0	0	0	0		2	0	7	14				d	2.8.18.32.32.15.2
109	Ds	110	7	10	281	10	0	0	1.28	0	0	0	0	0	0	0	0	0	0		1	0	9	14				d	2.8.18.32.32.17.1
110	Rg	111	7	11	280	12	0	0	1.21	0	0	0	0	0	0	0	0	0	0		1	0	10	14				d	2.8.18.32.32.18.1
111	Cn	112	7	12	285	17	0	0	1.22	0	0	0	0	0	0	0	0	0	0		2	0	10	14				d	2.8.18.32.32.18.2
112	Nh	113	7	13	286	18	0	0	1.36	0	0	0	0	0	0	0	0	0	0		2	1	10	14				p	2.8.18.32.32.18.3
113	Fl	114	7	14	289	21	0	0	1.43	0	0	0	0	0	0	0	0	0	0		2	2	10	14				p	2.8.18.32.32.18.4
114	Mc	115	7	15	289	22	0	0	1.62	0	0	0	0	0	0	0	0	0	0		2	3	10	14				p	2.8.18.32.32.18.5
115	Lv	116	7	16	293	26	0	0	1.75	0	0	0	0	0	0	0	0	0	0		2	4	10	14				p	2.8.18.32.32.18.6
116	Ts	117	7	17	294	41	0	0	1.65	0	0	0	0	0	0	0	0	0	0		2	5	10	14				p	2.8.18.32.32.18.7
117	Og	118	7	18	294	52	0	0	1.57	0	0	5.403	0	0.023	0	0	0	0	0		2	6	10	14				p	2.8.18.32.32.18.8
