# Supplementary material for: A progressive learning method for predicting the band gap of ABO3 perovskites using an instrumental variable
Source: Royal Society of Chemistry journal article supplement (doi:10.1039/c9tc06632b), 2020-01-01
Supplement: c9tc06632b4.xlsx [file c9tc06632b4.xlsx]

## Sheet: Supplementary Data4-Parameters 
Supplementary Data4-Parameters of BVVS
num	ele1	valence1	ele2	valence2	R0	b	ref_id
0	Ac	3	O	-2	2.24	0.37	b
1	Ac	3	O	-2	2.29	0.35	p
2	Ac	3	F	-1	2.13	0.37	b
3	Ac	3	F	-1	2.1	0.4	p
4	Ac	3	Cl	-1	2.63	0.37	b
5	Ac	3	Cl	-1	2.6	0.4	p
6	Ac	3	Br	-1	2.75	0.4	p
7	Ag	1	O	-2	1.842	0.37	a
8	Ag	1	O	-2	1.875	0.359	bs
9	Ag	1	O	-2	1.805	0.37	b
10	Ag	1	S	-2	2.119	0.37	a
11	Ag	1	F	-1	1.8	0.37	b
12	Ag	1	Cl	-1	2.09	0.37	b
13	Ag	2	F	-1	1.79	0.37	e
14	Ag	3	F	-1	1.83	0.37	e
15	Ag	9	Br	-1	2.22	0.37	b
16	Ag	9	I	-1	2.38	0.37	b
17	Ag	9	Se	-2	2.26	0.37	b
18	Ag	9	Te	-2	2.51	0.37	b
19	Ag	9	N	-3	1.85	0.37	b
20	Ag	9	P	-3	2.22	0.37	b
21	Ag	9	As	-3	2.3	0.37	b
22	Ag	9	H	-1	1.5	0.37	b
23	Al	3	O	-2	1.651	0.37	a
24	Al	3	O	-2	1.634	0.39	bs
25	Al	3	O	-2	1.644	0.38	o
26	Al	3	S	-2	2.21	0.37	e
27	Al	3	S	-2	2.13	0.37	b
28	Al	3	Se	-2	2.27	0.37	b
29	Al	3	Te	-2	2.48	0.37	b
30	Al	3	F	-1	1.545	0.37	a
31	Al	3	Cl	-1	2.032	0.37	a
32	Al	3	Br	-1	2.2	0.37	b
33	Al	3	I	-1	2.41	0.37	b
34	Al	3	N	-3	1.79	0.37	b
35	Al	3	P	-3	2.24	0.37	b
36	Al	3	As	-3	2.3	0.37	b
37	Al	3	H	-1	1.45	0.37	b
38	Am	3	O	-2	2.11	0.37	b
39	Am	3	O	-2	2.068	0.392	bs
40	Am	3	O	-2	2.13	0.35	p
41	Am	3	F	-1	2	0.37	b
42	Am	3	F	-1	1.98	0.4	p
43	Am	3	Cl	-1	2.48	0.37	b
44	Am	3	Cl	-1	2.45	0.4	p
45	Am	3	Br	-1	2.59	0.4	p
46	Am	4	O	-2	2.08	0.37	p
47	Am	4	O	-2	2.12	0.37	e
48	Am	4	F	-1	1.96	0.4	p
49	Am	5	O	-2	2.07	0.35	p
50	Am	5	F	-1	1.95	0.4	p
51	Am	6	O	-2	2.05	0.35	p
52	Am	6	F	-1	1.95	0.4	p
53	Am	5	O	-2	2.12	0.37	e
54	As	2	S	-2	2.24	0.37	e
55	As	2	Se	-2	2.38	0.37	e
56	As	3	O	-2	1.74	0.5	e
57	As	3	O	-2	1.775	0.423	bs
58	As	3	O	-2	1.789	0.37	a
59	As	3	S	-2	2.272	0.37	a
60	As	3	Se	-2	2.4	0.37	e
61	As	3	Te	-2	2.65	0.37	e
62	As	3	F	-1	1.7	0.37	b
63	As	3	Cl	-1	2.16	0.37	b
64	As	3	Br	-1	2.35	0.37	e
65	As	3	I	-1	2.58	0.37	e
66	As	3	C	-4	1.93	0.37	b
67	As	5	O	-2	1.767	0.37	a
68	As	5	O	-2	1.765	0.352	bs
69	As	5	S	-2	2.28	0.37	e
70	As	5	F	-1	1.62	0.37	a
71	As	5	Cl	-2	2.14	0.37	b
72	Au	1	Cl	-1	2.02	0.37	e
73	Au	1	I	-1	2.35	0.37	e
74	Au	3	O	-2	1.89	0.37	e
75	Au	3	O	-2	1.833	0.37	b
76	Au	3	O	-2	1.89	0.375	bs
77	Au	3	S	-2	2.39	0.35	e
78	Au	3	F	-1	1.89	0.37	e
79	Au	3	F	-1	1.81	0.37	b
80	Au	3	Cl	-1	2.17	0.37	b
81	Au	3	Br	-1	2.32	0.37	e
82	Au	3	I	-1	2.54	0.37	e
83	Au	3	N	-3	1.94	0.35	e
84	Au	5	F	-1	1.8	0.37	e
85	Au	9	S	-2	2.03	0.37	b
86	Au	9	Se	-2	2.18	0.37	b
87	Au	9	Te	-2	2.41	0.37	b
88	Au	9	Br	-1	2.12	0.37	b
89	Au	9	I	-1	2.34	0.37	b
90	Au	9	N	-3	1.72	0.37	b
91	Au	9	P	-3	2.14	0.37	b
92	Au	9	As	-3	2.22	0.37	b
93	Au	9	H	-1	1.37	0.37	b
94	B	3	O	-2	1.371	0.37	a
95	B	3	O	-2	1.372	0.357	bs
96	B	3	O	-2	1.364	0.37	br
97	B	3	S	-2	1.815	0.37	au
98	B	3	S	-2	1.82	0.37	b
99	B	3	Se	-2	1.95	0.37	b
100	B	3	Te	-2	2.2	0.37	b
101	B	3	F	-1	1.281	0.37	a
102	B	3	F	-1	1.289	0.37	au
103	B	3	F	-1	1.31	0.37	b
104	B	3	Cl	-1	1.74	0.37	b
105	B	3	Br	-1	1.88	0.37	b
106	B	3	I	-1	2.1	0.37	b
107	B	3	N	-3	1.482	0.37	au
108	B	3	N	-3	1.47	0.37	b
109	B	3	P	-3	1.92	0.37	au
110	B	3	P	-3	1.88	0.37	b
111	B	3	As	-3	1.97	0.37	b
112	B	3	H	-1	1.14	0.37	b
113	B	3	C	-4	1.569	0.28	br
114	B	3	B	3	1.402	0.37	e
115	Ba	2	O	-2	2.285	0.37	a
116	Ba	2	O	-2	2.223	0.406	bs
117	Ba	2	S	-2	2.769	0.37	a
118	Ba	2	Se	-2	2.88	0.37	b
119	Ba	2	Te	-2	3.08	0.37	b
120	Ba	2	F	-1	2.188	0.37	a
121	Ba	2	Cl	-1	2.69	0.37	b
122	Ba	2	Br	-1	2.88	0.37	b
123	Ba	2	I	-1	3.13	0.37	b
124	Ba	2	N	-3	2.47	0.37	b
125	Ba	2	P	-3	2.88	0.37	b
126	Ba	2	As	-3	2.96	0.37	b
127	Ba	2	H	-1	2.22	0.37	b
128	Be	2	O	-2	1.381	0.37	a
129	Be	2	O	-2	1.429	0.297	bs
130	Be	2	S	-2	1.83	0.37	b
131	Be	2	Se	-2	1.97	0.37	b
132	Be	2	Te	-2	2.21	0.37	b
133	Be	2	F	-1	1.281	0.37	a
134	Be	2	Cl	-1	1.76	0.37	b
135	Be	2	Br	-1	1.9	0.37	b
136	Be	2	I	-1	2.1	0.37	b
137	Be	2	N	-3	1.5	0.37	b
138	Be	2	P	-3	1.95	0.37	b
139	Be	2	As	-3	2	0.37	b
140	Be	2	H	-1	1.11	0.37	b
141	Bi	3	O	-2	1.99	0.48	bj
142	Bi	3	O	-2	2.068	0.389	bs
143	Bi	3	O	-2	2.094	0.37	a
144	Bi	3	S	-2	2.57	0.37	a
145	Bi	3	Se	-2	2.7	0.35	e
146	Bi	3	F	-1	1.99	0.37	b
147	Bi	3	Cl	-1	2.48	0.37	b
148	Bi	3	Cl	-1	2.4	0.37	e
149	Bi	3	Br	-1	2.597	0.37	ak
150	Bi	3	Br	-1	2.567	0.421	ak
151	Bi	3	I	-1	2.82	0.37	e
152	Bi	3	N	-3	2.02	0.35	e
153	Bi	5	O	-2	2.06	0.37	b
154	Bi	5	O	-2	2.05	0.318	bs
155	Bi	5	F	-1	1.97	0.37	b
156	Bi	5	Cl	-1	2.44	0.37	b
157	Bi	9	Br	-1	2.62	0.37	b
158	Bi	9	I	-1	2.84	0.37	b
159	Bi	9	S	-2	2.55	0.37	b
160	Bi	9	Se	-2	2.72	0.37	b
161	Bi	9	Te	-2	2.87	0.37	b
162	Bi	9	N	-3	2.24	0.37	b
163	Bi	9	P	-3	2.63	0.37	b
164	Bi	9	As	-3	2.72	0.37	b
165	Bi	9	H	-1	1.97	0.37	b
166	Bk	3	O	-2	2.08	0.37	b
167	Bk	3	O	-2	2.1	0.35	p
168	Bk	3	F	-1	1.96	0.37	b
169	Bk	3	F	-1	1.95	0.4	p
170	Bk	3	Cl	-1	2.35	0.37	e
171	Bk	3	Cl	-1	2.46	0.37	b
172	Bk	3	Cl	-1	2.42	0.4	p
173	Bk	3	Br	-1	2.56	0.4	p
174	Bk	4	O	-2	2.07	0.35	p
175	Bk	4	F	-1	1.93	0.4	p
176	Br	3	O	-2	1.9	0.37	e
177	Br	3	F	-1	1.75	0.37	e
178	Br	5	O	-2	1.89	0.571	bs
179	Br	5	O	-2	1.84	0.37	e
180	Br	5	F	-1	1.76	0.37	e
181	Br	7	O	-2	1.81	0.37	b
182	Br	7	O	-2	1.85	0.428	bs
183	Br	7	F	-1	1.72	0.37	b
184	Br	7	Cl	-1	2.19	0.37	b
185	C	2	O	-2	1.366	0.37	e
186	C	2	Cl	-1	1.41	0.37	e
187	C	4	O	-2	1.39	0.37	a
188	C	4	O	-2	1.398	0.399	bs
189	C	4	O	-2	1.407	0.37	au
190	C	4	O	-2	1.4	0.26	o
191	C	4	C	4	1.54	0.37	e
192	C	4	S	-2	1.8	0.37	e
193	C	4	F	-1	1.32	0.37	b
194	C	4	F	-1	1.41	0.37	e
195	C	4	Cl	-1	1.76	0.37	b
196	C	4	Br	-1	1.91	0.37	e
197	C	4	N	-3	1.442	0.37	a
198	C	9	Se	-2	1.97	0.37	b
199	C	9	I	-1	2.12	0.37	b
200	C	9	Br	-1	1.9	0.37	b
201	C	9	S	-2	1.82	0.37	b
202	C	9	Te	-2	2.21	0.37	b
203	C	9	N	-3	1.47	0.37	b
204	C	9	P	-3	1.89	0.37	b
205	C	9	As	-3	1.99	0.37	b
206	C	9	H	-1	1.1	0.37	b
207	Ca	2	O	-2	1.967	0.37	a
208	Ca	2	O	-2	1.907	0.409	bs
209	Ca	2	O	-2	1.896	0.41	o
210	Ca	2	S	-2	2.45	0.37	b
211	Ca	2	Se	-2	2.56	0.37	b
212	Ca	2	Te	-2	2.76	0.37	b
213	Ca	2	F	-1	1.842	0.37	a
214	Ca	2	Cl	-1	2.37	0.37	b
215	Ca	2	Br	-1	2.507	0.37	e
216	Ca	2	Br	-1	2.49	0.37	b
217	Ca	2	I	-1	2.72	0.37	b
218	Ca	2	N	-3	2.14	0.37	b
219	Ca	2	P	-3	2.55	0.37	b
220	Ca	2	As	-3	2.62	0.37	b
221	Ca	2	H	-1	1.83	0.37	b
222	Cd	2	O	-2	1.904	0.37	a
223	Cd	2	O	-2	1.827	0.43	bs
224	Cd	2	O	-2	1.875	0.37	ao
225	Cd	2	S	-2	2.304	0.37	a
226	Cd	2	S	-2	2.279	0.37	ao
227	Cd	2	Se	-2	2.4	0.37	b
228	Cd	2	Te	-2	2.59	0.37	b
229	Cd	2	F	-1	1.811	0.37	b
230	Cd	2	Cl	-1	2.212	0.37	a
231	Cd	2	Cl	-1	2.23	0.37	b
232	Cd	2	Cl	-1	2.22	0.37	ao
233	Cd	2	Br	-1	2.334	0.37	ao
234	Cd	2	Br	-1	2.35	0.37	b
235	Cd	2	I	-1	2.525	0.37	ao
236	Cd	2	I	-1	2.57	0.37	b
237	Cd	2	I	-1	2.6	0.37	e
238	Cd	2	N	-3	1.96	0.37	b
239	Cd	2	N	-3	1.951	0.37	ao
240	Cd	2	P	-3	2.34	0.37	b
241	Cd	2	As	-3	2.43	0.37	b
242	Cd	2	H	-1	1.66	0.37	b
243	Ce	3	O	-2	2.151	0.37	b
244	Ce	3	O	-2	2.114	0.389	bs
245	Ce	3	O	-2	2.118	0.37	bl
246	Ce	3	O	-2	2.121	0.37	ab
247	Ce	3	O	-2	2.116	0.37	ae
248	Ce	3	S	-2	2.602	0.37	al
249	Ce	3	S	-2	2.65	0.37	e
250	Ce	3	F	-1	2.036	0.37	b
251	Ce	3	F	-1	2.251	0.37	bl
252	Ce	3	F	-1	2	0.4	p
253	Ce	3	Cl	-1	2.52	0.37	b
254	Ce	3	Cl	-1	2.49	0.4	p
255	Ce	3	Cl	-1	2.54	0.37	al
256	Ce	3	Br	-1	2.65	0.35	e
257	Ce	3	Br	-1	2.65	0.4	p
258	Ce	3	I	-1	2.87	0.4	p
259	Ce	4	O	-2	2.028	0.37	b
260	Ce	4	O	-2	2.046	0.416	bs
261	Ce	4	O	-2	2.07	0.37	bl
262	Ce	4	O	-2	2.068	0.37	ab
263	Ce	4	O	-2	2.074	0.37	al
264	Ce	4	S	-2	2.65	0.35	e
265	Ce	4	F	-1	1.995	0.37	b
266	Ce	4	F	-1	1.97	0.4	p
267	Ce	4	N	-3	2.179	0.37	al
268	Ce	4	N	-3	2.202	0.37	bl
269	Ce	9	Cl	-1	2.41	0.37	b
270	Ce	9	Br	-1	2.69	0.37	b
271	Ce	9	I	-1	2.92	0.37	b
272	Ce	9	S	-2	2.62	0.37	b
273	Ce	9	Se	-2	2.74	0.37	b
274	Ce	9	Te	-2	2.92	0.37	b
275	Ce	9	N	-3	2.254	0.37	ah
276	Ce	9	N	-3	2.34	0.37	b
277	Ce	9	P	-3	2.7	0.37	b
278	Ce	9	As	-3	2.78	0.37	b
279	Ce	9	H	-1	2.04	0.37	b
280	Cf	3	O	-2	2.07	0.37	b
281	Cf	3	F	-1	1.95	0.37	b
282	Cf	3	F	-1	1.94	0.4	p
283	Cf	3	Cl	-1	2.45	0.37	b
284	Cf	3	Cl	-1	2.41	0.4	p
285	Cf	3	Br	-1	2.55	0.4	p
286	Cf	4	O	-2	2.06	0.35	p
287	Cf	4	F	-1	1.92	0.4	p
288	Cl	3	O	-2	1.722	0.37	bs
289	Cl	3	O	-2	1.71	0.37	e
290	Cl	3	F	-1	1.69	0.37	e
291	Cl	5	O	-2	1.703	0.428	bs
292	Cl	5	O	-2	1.67	0.37	e
293	Cl	7	O	-2	1.632	0.37	a
294	Cl	7	O	-2	1.669	0.428	bs
295	Cl	7	F	-1	1.55	0.37	b
296	Cl	7	Cl	-1	2	0.37	b
297	Cf	3	Cl	-1	2.45	0.37	b
298	Cm	3	O	-2	2.23	0.37	b
299	Cm	3	O	-2	2.12	0.35	p
300	Cm	3	F	-1	2.12	0.37	b
301	Cm	3	F	-1	1.96	0.4	p
302	Cm	3	Cl	-1	2.62	0.37	b
303	Cm	3	Cl	-1	2.44	0.4	p
304	Cm	4	O	-2	2.08	0.35	p
305	Cm	4	O	-2	2.034	0.412	bs
306	Cm	4	F	-1	1.94	0.4	p
307	Co	1	H	-1	1	0.35	e
308	Co	2	O	-2	1.692	0.37	a
309	Co	2	O	-2	1.698	0.376	bs
310	Co	2	O	-2	1.685	0.37	i
311	Co	2	S	-2	1.94	0.37	e
312	Co	2	F	-1	1.64	0.37	b
313	Co	2	Cl	-1	2.033	0.37	a
314	Co	2	Cl	-1	2.01	0.37	b
315	Co	2	N	-3	1.72	0.37	bq
316	Co	2	N	-3	1.6	0.37	bq
317	Co	3	O	-2	1.637	0.37	i
318	Co	3	O	-2	1.655	0.364	bs
319	Co	3	O	-2	1.7	0.37	b
320	Co	3	S	-2	2.02	0.37	e
321	Co	3	F	-1	1.62	0.37	b
322	Co	3	Cl	-1	2.05	0.37	b
323	Co	3	N	-3	1.69	0.37	bq
324	Co	3	C	2	1.634	0.37	b
325	Co	4	O	-2	1.729	0.358	bs
326	Co	4	O	-2	1.72	0.37	e
327	Co	4	F	-1	1.55	0.37	e
328	Co	9	O	-2	1.655	0.42	o
329	Co	9	Br	-1	2.18	0.37	b
330	Co	9	I	-1	2.37	0.35	b
331	Co	9	S	-2	2.06	0.37	b
332	Co	9	Se	-2	2.24	0.37	b
333	Co	9	Te	-2	2.46	0.37	b
334	Co	9	N	-3	1.84	0.37	b
335	Co	9	P	-3	2.21	0.37	b
336	Co	9	As	-3	2.28	0.37	b
337	Co	9	H	-1	1.44	0.37	b
338	Cr	2	O	-2	1.761	0.35	bs
339	Cr	2	O	-2	1.73	0.37	b
340	Cr	2	F	-1	1.67	0.37	b
341	Cr	2	F	-1	1.74	0.37	e
342	Cr	2	Cl	-1	2.09	0.37	b
343	Cr	2	Br	-1	2.26	0.37	e
344	Cr	2	I	-1	2.48	0.37	e
345	Cr	2	N	-3	1.8	0.37	bq
346	Cr	2	N	-3	1.86	0.37	bq
347	Cr	3	O	-2	1.724	0.37	a
348	Cr	3	O	-2	1.725	0.361	bs
349	Cr	3	O	-2	1.708	0.37	w
350	Cr	3	S	-2	2.162	0.37	e
351	Cr	3	F	-1	1.657	0.37	a
352	Cr	3	F	-1	1.64	0.37	b
353	Cr	3	Cl	-1	2.08	0.37	b
354	Cr	3	Br	-1	2.28	0.37	e
355	Cr	3	N	-3	1.78	0.37	bq
356	Cr	4	O	-2	1.783	0.41	bs
357	Cr	4	O	-2	1.81	0.37	e
358	Cr	4	F	-1	1.56	0.37	e
359	Cr	5	O	-2	1.76	0.37	w
360	Cr	5	O	-2	1.777	0.375	bs
361	Cr	6	O	-2	1.794	0.37	a
362	Cr	6	O	-2	1.709	0.375	bs
363	Cr	6	F	-1	1.74	0.37	b
364	Cr	6	Cl	-1	2.12	0.37	b
365	Cr	9	O	-2	1.79	0.34	o
366	Cr	9	O	-2	1.724	0.37	w
367	Cr	9	Br	-1	2.26	0.37	b
368	Cr	9	I	-1	2.45	0.37	b
369	Cr	9	S	-2	2.18	0.37	b
370	Cr	9	Se	-2	2.29	0.37	b
371	Cr	9	Te	-2	2.52	0.37	b
372	Cr	9	N	-3	1.85	0.37	b
373	Cr	9	P	-3	2.27	0.37	b
374	Cr	9	As	-3	2.34	0.37	b
375	Cr	9	H	-1	1.52	0.37	b
376	Cs	1	O	-2	2.417	0.37	a
377	Cs	1	O	-2	2.296	0.411	bs
378	Cs	1	O	-2	2.2862	0.408	c
379	Cs	1	S	-2	2.89	0.37	b
380	Cs	1	S	-2	2.5253	0.517	c
381	Cs	1	S	-2	2.93	0.37	e
382	Cs	1	Se	-2	2.98	0.37	b
383	Cs	1	Se	-2	2.6424	0.553	c
384	Cs	1	Te	-2	3.16	0.37	b
385	Cs	1	Te	-2	2.7647	0.603	c
386	Cs	1	F	-1	2.33	0.37	b
387	Cs	1	F	-1	2.198	0.41	c
388	Cs	1	F	-1	2.38	0.37	e
389	Cs	1	Cl	-1	2.791	0.37	a
390	Cs	1	Cl	-1	2.4715	0.495	c
391	Cs	1	Br	-1	2.95	0.37	b
392	Cs	1	Br	-1	2.5035	0.543	c
393	Cs	1	I	-1	3.18	0.37	b
394	Cs	1	I	-1	2.6926	0.609	c
395	Cs	1	I	-1	3.29	0.37	e
396	Cs	1	N	-3	2.83	0.37	e
397	Cs	1	N	-3	2.53	0.37	b
398	Cs	1	P	-3	2.93	0.37	b
399	Cs	1	As	-3	3.04	0.37	b
400	Cs	1	H	-1	2.44	0.37	b
401	Cu	1	O	-2	1.61	0.37	e
402	Cu	1	O	-2	1.601	0.335	bs
403	Cu	1	O	-2	1.504	0.37	l
404	Cu	1	S	-2	1.898	0.37	a
405	Cu	1	S	-2	1.811	0.37	l
406	Cu	1	Se	-2	1.9	0.37	l
407	Cu	1	F	-1	1.6	0.37	b
408	Cu	1	Cl	-1	1.858	0.37	l
409	Cu	1	Cl	-1	1.89	0.37	e
410	Cu	1	Br	-1	2.03	0.37	e
411	Cu	1	I	-1	2.108	0.37	a
412	Cu	1	I	-1	2.155	0.37	l
413	Cu	1	N	-3	1.52	0.37	l
414	Cu	1	N	-3	1.48	0.37	l
415	Cu	1	N	-3	1.63	0.37	l
416	Cu	1	P	-3	1.774	0.37	l
417	Cu	1	As	-3	1.856	0.37	l
418	Cu	1	C	-4	1.446	0.37	l
419	Cu	2	O	-2	1.679	0.36	bj
420	Cu	2	O	-2	1.687	0.355	bs
421	Cu	2	O	-2	1.679	0.37	a
422	Cu	2	O	-2	1.649	0.37	j
423	Cu	2	O	-2	1.655	0.37	l
424	Cu	2	S	-2	2.054	0.37	a
425	Cu	2	S	-2	2.06	0.37	j
426	Cu	2	S	-2	2.024	0.37	l
427	Cu	2	S	-2	1.86	0.37	b
428	Cu	2	Se	-2	2.02	0.37	b
429	Cu	2	Se	-2	2.124	0.37	l
430	Cu	2	Te	-2	2.27	0.37	b
431	Cu	2	F	-1	1.594	0.37	a
432	Cu	2	Cl	-1	2	0.37	b
433	Cu	2	Br	-1	1.99	0.37	b
434	Cu	2	Br	-1	2.134	0.37	l
435	Cu	2	I	-1	2.16	0.37	b
436	Cu	2	I	-1	2.36	0.37	l
437	Cu	2	N	-3	1.751	0.37	j
438	Cu	2	N	-3	1.713	0.37	l
439	Cu	2	N	-3	1.61	0.37	b
440	Cu	2	N	-3	1.709	0.37	l
441	Cu	2	N	-3	1.704	0.37	l
442	Cu	2	N	-3	1.763	0.37	l
443	Cu	2	P	-3	1.97	0.37	b
444	Cu	2	P	-3	2.05	0.37	l
445	Cu	2	As	-3	2.08	0.37	b
446	Cu	2	C	-4	1.72	0.37	l
447	Cu	2	H	-1	1.21	0.37	b
448	Cu	3	O	-2	1.735	0.37	t
449	Cu	3	O	-2	1.737	0.375	bs
450	Cu	3	O	-2	1.739	0.37	e
451	Cu	3	F	-1	1.58	0.37	e
452	Cu	3	Cl	-1	2.078	0.37	l
453	Cu	3	N	-3	1.768	0.37	l
454	Cu	3	N	-3	1.753	0.37	t
455	Cu	3	C	-4	1.84	0.37	l
456	Dy	2	O	-2	1.9	0.37	e
457	Dy	3	O	-2	2.001	0.37	a
458	Dy	3	O	-2	2.002	0.389	bs
459	Dy	3	O	-2	2.005	0.37	ae
460	Dy	3	F	-1	1.922	0.37	b
461	Dy	3	F	-1	1.89	0.4	p
462	Dy	3	Cl	-1	2.41	0.37	b
463	Dy	3	Cl	-1	2.38	0.4	p
464	Dy	3	Cl	-1	2.407	0.37	al
465	Dy	3	Br	-1	2.53	0.4	p
466	Dy	3	I	-1	2.76	0.4	p
467	Dy	9	Br	-1	2.56	0.37	b
468	Dy	9	I	-1	2.77	0.37	b
469	Dy	9	S	-2	2.47	0.37	b
470	Dy	9	S	-2	2.473	0.37	al
471	Dy	9	Se	-2	2.61	0.37	b
472	Dy	9	Te	-2	2.8	0.37	b
473	Dy	9	N	-3	2.124	0.37	ah
474	Dy	9	N	-3	2.18	0.37	b
475	Dy	9	P	-3	2.57	0.37	b
476	Dy	9	As	-3	2.64	0.37	b
477	Dy	9	H	-1	1.89	0.37	b
478	Er	2	O	-2	1.88	0.37	e
479	Er	2	S	-2	2.52	0.37	e
480	Er	3	O	-2	1.988	0.37	a
481	Er	3	O	-2	1.991	0.373	bs
482	Er	3	O	-2	2.01	0.37	b
483	Er	3	O	-2	1.979	0.37	ae
484	Er	3	S	-2	2.475	0.37	al
485	Er	3	Se	-2	2.58	0.37	e
486	Er	3	F	-1	1.904	0.37	a
487	Er	3	F	-1	1.87	0.4	p
488	Er	3	Cl	-1	2.39	0.37	b
489	Er	3	Cl	-1	2.385	0.37	al
490	Er	3	Cl	-1	2.36	0.4	p
491	Er	3	Br	-1	2.51	0.4	p
492	Er	3	I	-1	2.75	0.4	p
493	Er	9	Br	-1	2.54	0.37	b
494	Er	9	I	-1	2.75	0.37	b
495	Er	9	S	-2	2.46	0.37	b
496	Er	9	Se	-2	2.59	0.37	b
497	Er	9	Te	-2	2.78	0.37	b
498	Er	9	N	-3	2.086	0.37	ah
499	Er	9	N	-3	2.16	0.37	b
500	Er	9	P	-3	2.55	0.37	b
501	Er	9	As	-3	2.63	0.37	b
502	Er	9	H	-1	1.86	0.37	b
503	Es	3	O	-2	2.08	0.35	p
504	Eu	2	O	-2	2.147	0.37	b
505	Eu	2	O	-2	2.102	0.37	al
506	Eu	2	O	-2	1.943	0.49	bs
507	Eu	2	S	-2	2.584	0.37	a
508	Eu	2	F	-1	2.04	0.37	b
509	Eu	2	Cl	-1	2.53	0.37	b
510	Eu	2	Br	-1	2.67	0.37	e
511	Eu	2	I	-1	2.9	0.37	e
512	Eu	2	N	-3	2.16	0.37	al
513	Eu	3	O	-2	2.074	0.37	a
514	Eu	3	O	-2	2.068	0.359	bs
515	Eu	3	O	-2	2.038	0.37	ae
516	Eu	3	S	-2	2.509	0.37	al
517	Eu	3	F	-1	1.961	0.37	b
518	Eu	3	F	-1	1.93	0.4	p
519	Eu	3	Cl	-1	2.455	0.37	b
520	Eu	3	Cl	-1	2.468	0.37	al
521	Eu	3	Cl	-1	2.42	0.4	p
522	Eu	3	Br	-1	2.57	0.4	p
523	Eu	3	I	-1	2.79	0.4	p
524	Eu	9	Br	-1	2.61	0.37	b
525	Eu	9	I	-1	2.83	0.37	b
526	Eu	9	S	-2	2.53	0.37	b
527	Eu	9	Se	-2	2.66	0.37	b
528	Eu	9	Te	-2	2.85	0.37	b
529	Eu	9	N	-3	2.161	0.37	ah
530	Eu	9	N	-3	2.24	0.37	b
531	Eu	9	P	-3	2.62	0.37	b
532	Eu	9	As	-3	2.7	0.37	b
533	Eu	9	H	-1	1.95	0.37	b
534	Fe	2	O	-2	1.734	0.37	a
535	Fe	2	O	-2	1.658	0.447	bs
536	Fe	2	O	-2	1.713	0.37	h
537	Fe	2	O	-2	1.7	0.37	j
538	Fe	2	S	-2	2.12	0.37	e
539	Fe	2	S	-2	2.125	0.37	j
540	Fe	2	F	-1	1.65	0.37	b
541	Fe	2	Cl	-1	2.06	0.37	b
542	Fe	2	Cl	-1	2.15	0.37	e
543	Fe	2	Br	-1	2.21	0.35	e
544	Fe	2	I	-1	2.47	0.35	e
545	Fe	2	N	-3	1.76	0.37	bq
546	Fe	2	N	-3	1.66	0.37	bq
547	Fe	2	N	-3	1.56	0.37	bq
548	Fe	2	N	-3	1.769	0.37	j
549	Fe	3	O	-2	1.759	0.37	a
550	Fe	3	O	-2	1.766	0.36	bs
551	Fe	3	O	-2	1.751	0.37	h
552	Fe	3	O	-2	1.765	0.37	j
553	Fe	3	S	-2	2.149	0.37	a
554	Fe	3	S	-2	2.134	0.37	j
555	Fe	3	F	-1	1.679	0.37	a
556	Fe	3	Cl	-1	2.09	0.37	b
557	Fe	3	Cl	-1	2.15	0.37	e
558	Fe	3	Br	-1	2.22	0.37	e
559	Fe	3	N	-3	1.82	0.37	bq
560	Fe	3	N	-3	1.7	0.37	bq
561	Fe	3	N	-3	1.815	0.37	j
562	Fe	3	C	2	1.689	0.37	a
563	Fe	4	S	-2	2.23	0.35	e
564	Fe	6	O	-2	1.76	0.35	e
565	Fe	9	O	-2	1.795	0.3	ag
566	Fe	9	O	-2	1.74	0.38	o
567	Fe	9	Br	-1	2.26	0.37	b
568	Fe	9	I	-1	2.47	0.37	b
569	Fe	9	S	-2	2.16	0.37	b
570	Fe	9	Se	-2	2.28	0.37	b
571	Fe	9	Te	-2	2.53	0.37	b
572	Fe	9	N	-3	1.86	0.37	b
573	Fe	9	P	-3	2.27	0.37	b
574	Fe	9	As	-3	2.35	0.37	b
575	Fe	9	H	-1	1.53	0.37	b
576	Ga	1	Se	-1	2.55	0.37	e
577	Ga	3	O	-2	1.73	0.37	a
578	Ga	3	O	-2	1.736	0.345	bs
579	Ga	3	S	-2	2.163	0.37	a
580	Ga	3	F	-1	1.62	0.37	b
581	Ga	3	F	-1	1.69	0.37	e
582	Ga	3	Cl	-1	2.07	0.37	b
583	Ga	3	Br	-1	2.2	0.35	e
584	Ga	3	I	-1	2.46	0.37	e
585	Ga	9	Br	-1	2.24	0.37	b
586	Ga	9	I	-1	2.45	0.37	b
587	Ga	9	S	-2	2.17	0.37	b
588	Ga	9	Se	-2	2.3	0.37	b
589	Ga	9	Te	-2	2.54	0.37	b
590	Ga	9	N	-3	1.84	0.37	b
591	Ga	9	P	-3	2.26	0.37	b
592	Ga	9	As	-3	2.34	0.37	b
593	Ga	9	H	-1	1.51	0.37	b
594	Gd	2	O	-2	2.01	0.37	e
595	Gd	2	F	-1	2.4	0.37	e
596	Gd	3	O	-2	2.065	0.37	b
597	Gd	3	O	-2	1.988	0.433	bs
598	Gd	3	O	-2	2.031	0.37	ae
599	Gd	3	S	-2	2.53	0.37	e
600	Gd	3	F	-1	1.95	0.37	b
601	Gd	3	F	-1	1.92	0.4	p
602	Gd	3	Cl	-1	2.445	0.37	b
603	Gd	3	Cl	-1	2.41	0.4	p
604	Gd	3	Cl	-1	2.457	0.37	al
605	Gd	3	Br	-1	2.56	0.4	p
606	Gd	3	I	-1	2.78	0.4	p
607	Gd	9	Br	-1	2.6	0.37	b
608	Gd	9	I	-1	2.82	0.37	b
609	Gd	9	S	-2	2.53	0.37	b
610	Gd	9	S	-2	2.518	0.37	al
611	Gd	9	Se	-2	2.65	0.37	b
612	Gd	9	Te	-2	2.84	0.37	b
613	Gd	9	N	-3	2.146	0.37	ah
614	Gd	9	N	-3	2.22	0.37	b
615	Gd	9	N	-3	2.1	0.37	e
616	Gd	9	P	-3	2.61	0.37	b
617	Gd	9	As	-3	2.68	0.37	b
618	Gd	9	H	-1	1.93	0.37	b
619	Ge	2	S	-2	2.15	0.5	e
620	Ge	4	O	-2	1.748	0.37	a
621	Ge	4	O	-2	1.75	0.363	bs
622	Ge	4	S	-2	2.217	0.37	a
623	Ge	4	Se	-2	2.35	0.37	e
624	Ge	4	F	-1	1.66	0.37	b
625	Ge	4	Cl	-1	2.14	0.37	b
626	Ge	9	Br	-1	2.3	0.37	b
627	Ge	9	I	-1	2.5	0.37	b
628	Ge	9	S	-2	2.23	0.37	b
629	Ge	9	Se	-2	2.35	0.37	b
630	Ge	9	Te	-2	2.56	0.37	b
631	Ge	9	N	-3	1.88	0.37	b
632	Ge	9	P	-3	2.32	0.37	b
633	Ge	9	As	-3	2.43	0.37	b
634	Ge	9	H	-1	1.55	0.37	b
635	H	1	O	-2	0.569	0.94	bc
636	H	1	O	-2	0.907	0.28	bc
637	H	1	O	-2	0.99	0.59	bc
638	H	1	O	-2	0.918	0.427	bs
639	H	1	O	-2	0.925	0.4	az
640	H	1	O	-2	0.957	0.35	az
641	H	1	O	-2	0.87	0.457	ax
642	H	1	O	-2	0.79	0.37	ba
643	H	1	O	-2	1.409	0.37	ba
644	H	1	S	-2	1.192	0.591	ax
645	H	1	F	-1	0.708	0.558	ax
646	H	1	Cl	-1	1.336	0.53	am
647	H	1	N	-3	1.014	0.413	bb
648	Hf	3	F	-1	2.62	0.37	e
649	Hf	4	O	-2	1.923	0.37	b
650	Hf	4	O	-2	1.923	0.375	bs
651	Hf	4	F	-1	1.85	0.37	b
652	Hf	4	F	-1	1.82	0.4	p
653	Hf	4	Cl	-1	2.24	0.37	e
654	Hf	4	Cl	-1	2.3	0.37	b
655	Hf	9	Br	-1	2.47	0.37	b
656	Hf	9	S	-2	2.39	0.37	b
657	Hf	9	Se	-2	2.52	0.37	b
658	Hf	9	Te	-2	2.72	0.37	b
659	Hf	9	I	-1	2.68	0.37	b
660	Hf	9	N	-3	2.09	0.37	b
661	Hf	9	P	-3	2.48	0.37	b
662	Hf	9	As	-3	2.56	0.37	b
663	Hf	9	H	-1	1.78	0.37	b
664	Hg	1	O	-2	1.9	0.37	b
665	Hg	1	F	-1	1.81	0.37	b
666	Hg	1	Cl	-1	2.28	0.37	b
667	Hg	2	O	-2	1.924	0.38	bj
668	Hg	2	O	-2	1.972	0.37	a
669	Hg	2	O	-2	1.947	0.37	bs
670	Hg	2	O	-2	1.93	0.37	b
671	Hg	2	S	-2	2.308	0.37	a
672	Hg	2	F	-1	2.17	0.37	e
673	Hg	2	F	-1	1.9	0.37	b
674	Hg	2	Cl	-1	2.28	0.37	e
675	Hg	2	Cl	-1	2.25	0.37	b
676	Hg	2	Br	-1	2.38	0.37	e
677	Hg	2	I	-1	2.62	0.37	e
678	Hg	9	Br	-1	2.4	0.37	b
679	Hg	9	I	-1	2.59	0.37	b
680	Hg	9	S	-2	2.32	0.37	b
681	Hg	9	Se	-2	2.47	0.37	b
682	Hg	9	Te	-2	2.61	0.37	b
683	Hg	9	N	-3	2.02	0.37	b
684	Hg	9	P	-3	2.42	0.37	b
685	Hg	9	As	-3	2.5	0.37	b
686	Hg	9	H	-1	1.71	0.37	b
687	Hg	2	Hg	2	2.51	0.35	f
688	Ho	3	O	-2	2.025	0.37	a
689	Ho	3	O	-2	1.993	0.387	bs
690	Ho	3	O	-2	1.992	0.37	ae
691	Ho	3	S	-2	2.49	0.37	e
692	Ho	3	F	-1	1.908	0.37	b
693	Ho	3	F	-1	1.88	0.4	p
694	Ho	3	Cl	-1	2.401	0.37	b
695	Ho	3	Cl	-1	2.37	0.4	p
696	Ho	3	Cl	-1	2.399	0.37	al
697	Ho	3	Br	-1	2.52	0.4	p
698	Ho	3	I	-1	2.76	0.4	p
699	Ho	9	Br	-1	2.55	0.37	b
700	Ho	9	I	-1	2.77	0.37	b
701	Ho	9	S	-2	2.48	0.37	b
702	Ho	9	Se	-2	2.61	0.37	b
703	Ho	9	Te	-2	2.8	0.37	b
704	Ho	9	N	-3	2.118	0.37	ah
705	Ho	9	N	-3	2.18	0.37	b
706	Ho	9	P	-3	2.56	0.37	b
707	Ho	9	As	-3	2.64	0.37	b
708	Ho	9	H	-1	1.88	0.37	b
709	I	0	I	0	2.195	0.35	e
710	I	1	F	-1	2.32	0.37	e
711	I	1	Cl	-1	2.47	0.37	e
712	I	3	O	-2	2.02	0.37	e
713	I	3	F	-1	1.9	0.37	b
714	I	3	Cl	-1	2.39	0.37	e
715	I	5	O	-2	1.99	0.44	bd
716	I	5	O	-2	1.992	0.474	bs
717	I	5	O	-2	1.8	1	e
718	I	5	O	-2	2.003	0.37	a
719	I	5	F	-1	1.84	0.37	e
720	I	5	F	-1	1.9	0.37	b
721	I	5	Cl	-1	2.38	0.37	b
722	I	7	O	-2	1.93	0.37	b
723	I	7	F	-1	1.83	0.37	b
724	I	7	Cl	-1	2.31	0.37	b
725	In	1	Cl	-1	2.56	0.37	e
726	In	3	O	-2	1.902	0.37	a
727	In	3	O	-2	1.823	0.459	bs
728	In	3	S	-2	2.37	0.37	a
729	In	3	F	-1	1.792	0.37	a
730	In	3	Cl	-1	2.28	0.37	b
731	In	3	Br	-1	2.51	0.35	e
732	In	3	I	-1	2.63	0.37	e
733	In	3	Co	-1	2.593	0.35	e
734	In	3	Mn	-2	2.604	0.35	e
735	In	9	Br	-1	2.41	0.37	b
736	In	9	I	-1	2.63	0.37	b
737	In	9	S	-2	2.36	0.37	b
738	In	9	Se	-2	2.47	0.37	b
739	In	9	Te	-2	2.69	0.37	b
740	In	9	N	-3	2.03	0.37	b
741	In	9	P	-3	2.43	0.37	b
742	In	9	As	-3	2.51	0.37	b
743	In	9	H	-1	1.72	0.37	b
744	Ir	4	O	-2	1.909	0.258	bs
745	Ir	4	O	-2	1.87	0.37	e
746	Ir	4	F	-1	1.8	0.37	e
747	Ir	5	O	-2	1.916	0.37	b
748	Ir	5	O	-2	1.909	0.449	bs
749	Ir	5	O	-2	2.01	0.37	e
750	Ir	5	F	-1	1.82	0.37	b
751	Ir	5	Cl	-1	2.3	0.37	b
752	Ir	9	S	-2	2.38	0.37	b
753	Ir	9	Se	-2	2.51	0.37	b
754	Ir	9	Te	-2	2.71	0.37	b
755	Ir	9	Br	-1	2.45	0.37	b
756	Ir	9	I	-1	2.66	0.37	b
757	Ir	9	N	-3	2.06	0.37	b
758	Ir	9	P	-3	2.46	0.37	b
759	Ir	9	As	-3	2.54	0.37	b
760	Ir	9	H	-1	1.76	0.37	b
761	K	1	O	-2	2.132	0.37	a
762	K	1	O	-2	2.047	0.398	bs
763	K	1	O	-2	2.113	0.37	u
764	K	1	O	-2	1.9548	0.43	c
765	K	1	O	-2	1.84	0.48	o
766	K	1	S	-2	2.59	0.37	b
767	K	1	S	-2	2.1516	0.58	c
768	K	1	S	-2	2.63	0.37	e
769	K	1	Se	-2	2.72	0.37	b
770	K	1	Se	-2	2.2811	0.612	c
771	K	1	Te	-2	2.93	0.37	b
772	K	1	Te	-2	2.4102	0.653	c
773	K	1	F	-1	1.992	0.37	a
774	K	1	F	-1	1.8307	0.429	c
775	K	1	Cl	-1	2.519	0.37	a
776	K	1	Cl	-1	2.0707	0.559	c
777	K	1	Br	-1	2.66	0.37	b
778	K	1	Br	-1	2.1529	0.603	c
779	K	1	I	-1	2.88	0.37	b
780	K	1	I	-1	2.2821	0.658	c
781	K	1	I	-1	2.92	0.37	e
782	K	1	N	-3	2.26	0.37	b
783	K	1	N	-3	2.3	0.37	e
784	K	1	P	-3	2.64	0.37	b
785	K	1	As	-3	2.83	0.37	b
786	K	1	H	-1	2.1	0.37	b
787	Kr	2	F	-1	1.88	0.37	e
788	La	3	O	-2	2.086	0.45	bj
789	La	3	O	-2	2.179	0.359	bs
790	La	3	O	-2	2.172	0.37	a
791	La	3	O	-2	2.172	0.33	ac
792	La	3	O	-2	2.148	0.37	ae
793	La	3	S	-2	2.643	0.37	a
794	La	3	S	-2	2.632	0.37	al
795	La	3	Se	-2	2.74	0.37	b
796	La	3	Te	-2	2.94	0.37	b
797	La	3	F	-1	2.02	0.4	p
798	La	3	F	-1	2.08	0.37	e
799	La	3	Cl	-1	2.545	0.37	b
800	La	3	Cl	-1	2.57	0.37	e
801	La	3	Cl	-1	2.58	0.4	p
802	La	3	Br	-1	2.72	0.37	b
803	La	3	Br	-1	2.66	0.4	p
804	La	3	I	-1	2.93	0.37	b
805	La	3	I	-1	2.88	0.4	p
806	La	3	N	-3	2.261	0.37	ah
807	La	3	N	-3	2.34	0.37	b
808	La	3	P	-3	2.73	0.37	b
809	La	3	As	-3	2.8	0.37	b
810	La	3	H	-1	2.06	0.37	b
811	Li	1	O	-2	1.466	0.37	a
812	Li	1	O	-2	1.062	0.642	bs
813	Li	1	O	-2	1.1745	0.514	c
814	Li	1	O	-2	1.174	0.59	ay
815	Li	1	O	-2	1.29	0.48	o
816	Li	1	S	-2	1.94	0.37	b
817	Li	1	S	-2	1.4607	0.656	c
818	Li	1	Se	-2	2.09	0.37	b
819	Li	1	Se	-2	1.6272	0.681	c
820	Li	1	Te	-2	2.3	0.37	b
821	Li	1	Te	-2	1.734	0.717	c
822	Li	1	F	-1	1.36	0.37	a
823	Li	1	F	-1	1.0968	0.503	c
824	Li	1	Cl	-1	1.91	0.37	b
825	Li	1	Cl	-1	1.3873	0.64	c
826	Li	1	Cl	-1	1.94	0.37	e
827	Li	1	Br	-1	2.02	0.37	b
828	Li	1	Br	-1	1.515	0.674	c
829	Li	1	I	-1	2.22	0.37	b
830	Li	1	I	-1	1.6754	0.722	c
831	Li	1	N	-3	1.61	0.37	b
832	Li	1	N	-3	1.15	0.631	ay
833	Lu	3	O	-2	1.971	0.37	b
834	Lu	3	O	-2	1.939	0.403	bs
835	Lu	3	O	-2	1.947	0.37	ae
836	Lu	3	S	-2	2.43	0.37	b
837	Lu	3	Se	-2	2.56	0.37	b
838	Lu	3	Te	-2	2.75	0.37	b
839	Lu	3	F	-1	1.876	0.37	b
840	Lu	3	F	-1	1.84	0.4	p
841	Lu	3	Cl	-1	2.361	0.37	b
842	Lu	3	Cl	-1	2.361	0.37	al
843	Lu	3	Cl	-1	2.33	0.4	p
844	Lu	3	Br	-1	2.5	0.37	b
845	Lu	3	Br	-1	2.48	0.4	p
846	Lu	3	I	-1	2.73	0.37	b
847	Lu	3	I	-1	2.73	0.4	p
848	Lu	3	N	-3	2.046	0.37	ah
849	Lu	3	N	-3	2.11	0.37	b
850	Lu	3	P	-3	2.51	0.37	b
851	Lu	3	As	-3	2.59	0.37	b
852	Lu	3	H	-1	1.82	0.37	b
853	Mg	2	O	-2	1.693	0.37	a
854	Mg	2	O	-2	1.608	0.443	bs
855	Mg	2	O	-2	1.636	0.42	o
856	Mg	2	S	-2	2.18	0.37	b
857	Mg	2	Se	-2	2.32	0.37	b
858	Mg	2	Te	-2	2.53	0.37	b
859	Mg	2	F	-1	1.578	0.37	a
860	Mg	2	Cl	-1	2.08	0.37	b
861	Mg	2	Br	-1	2.28	0.37	b
862	Mg	2	I	-1	2.46	0.37	b
863	Mg	2	N	-3	1.85	0.37	b
864	Mg	2	P	-3	2.29	0.37	b
865	Mg	2	As	-3	2.38	0.37	b
866	Mg	2	H	-1	1.53	0.37	b
867	Mn	2	O	-2	1.79	0.37	a
868	Mn	2	O	-2	1.74	0.417	bs
869	Mn	2	O	-2	1.765	0.37	j
870	Mn	2	O	-2	1.762	0.4	ap
871	Mn	2	S	-2	2.22	0.37	e
872	Mn	2	F	-1	1.698	0.37	a
873	Mn	2	Cl	-1	2.133	0.37	a
874	Mn	2	Br	-1	2.34	0.37	e
875	Mn	2	I	-2	2.52	0.37	e
876	Mn	2	N	-3	1.84	0.37	bq
877	Mn	2	N	-3	1.68	0.37	bq
878	Mn	2	N	-3	1.53	0.37	bq
879	Mn	2	N	-3	1.849	0.37	j
880	Mn	3	O	-2	1.76	0.37	a
881	Mn	3	O	-2	1.823	0.247	bs
882	Mn	3	O	-2	1.732	0.37	j
883	Mn	3	O	-2	1.762	0.35	ap
884	Mn	3	F	-1	1.66	0.37	b
885	Mn	3	F	-1	1.666	0.36	at
886	Mn	3	Cl	-1	2.14	0.37	b
887	Mn	3	N	-3	1.82	0.37	bq
888	Mn	3	N	-3	1.71	0.37	bq
889	Mn	3	N	-3	1.837	0.37	j
890	Mn	4	O	-2	1.753	0.37	a
891	Mn	4	O	-2	1.75	0.374	bs
892	Mn	4	O	-2	1.75	0.37	j
893	Mn	4	O	-2	1.762	0.34	ap
894	Mn	4	F	-1	1.71	0.37	b
895	Mn	4	F	-1	1.63	0.37	e
896	Mn	4	Cl	-1	2.13	0.37	b
897	Mn	4	N	-3	1.822	0.37	j
898	Mn	5	O	-2	1.781	0.375	bs
899	Mn	5	O	-2	1.762	0.3	ap
900	Mn	6	O	-2	1.814	0.375	bs
901	Mn	6	O	-2	1.79	0.37	e
902	Mn	6	O	-2	1.762	0.27	ap
903	Mn	7	O	-2	1.819	0.375	bs
904	Mn	7	O	-2	1.827	0.37	e
905	Mn	7	O	-2	1.79	0.37	b
906	Mn	7	O	-2	1.762	0.26	ap
907	Mn	7	F	-1	1.72	0.37	b
908	Mn	7	Cl	-1	2.17	0.37	b
909	Mn	9	O	-2	1.754	0.37	g
910	Mn	9	Br	-1	2.26	0.37	b
911	Mn	9	I	-1	2.49	0.37	b
912	Mn	9	S	-2	2.2	0.37	b
913	Mn	9	Se	-1	2.32	0.37	b
914	Mn	9	Te	-2	2.55	0.37	b
915	Mn	9	N	-3	1.87	0.37	b
916	Mn	9	P	-3	2.24	0.37	b
917	Mn	9	As	-3	2.36	0.37	b
918	Mn	9	H	-1	1.55	0.37	b
919	Mo	2	S	-2	2.072	0.422	ax
920	Mo	2	Cl	-1	2.052	0.441	ax
921	Mo	3	O	-2	1.834	0.37	m
922	Mo	3	O	-2	1.792	0.436	bs
923	Mo	3	O	-2	1.789	0.418	ax
924	Mo	3	S	-2	2.062	0.519	ax
925	Mo	3	F	-1	1.76	0.35	e
926	Mo	3	F	-1	1.738	0.427	ax
927	Mo	3	Cl	-1	2.22	0.37	e
928	Mo	3	Cl	-1	2.089	0.501	ax
929	Mo	3	Br	-1	2.34	0.37	e
930	Mo	3	Br	-1	2.191	0.541	ax
931	Mo	3	N	-3	1.96	0.37	e
932	Mo	4	O	-2	1.886	0.37	j
933	Mo	4	O	-2	1.834	0.404	bs
934	Mo	4	O	-2	1.856	0.37	m
935	Mo	4	O	-2	1.724	0.562	ax
936	Mo	4	S	-2	2.235	0.37	j
937	Mo	4	F	-1	1.8	0.37	e
938	Mo	4	Cl	-1	2.128	0.558	ax
939	Mo	4	N	-3	2.043	0.37	j
940	Mo	5	O	-2	1.907	0.37	j
941	Mo	5	O	-2	1.888	0.314	bs
942	Mo	5	O	-2	1.878	0.37	m
943	Mo	5	O	-2	1.848	0.482	ax
944	Mo	5	S	-2	2.288	0.37	j
945	Mo	5	Cl	-1	2.26	0.37	e
946	Mo	5	N	-3	2.009	0.37	j
947	Mo	6	O	-2	1.907	0.37	a
948	Mo	6	O	-2	1.903	0.349	bs
949	Mo	6	O	-2	1.915	0.41	x
950	Mo	6	O	-2	1.87	0.26	n
951	Mo	6	O	-2	1.9	0.37	m
952	Mo	6	O	-2	1.912	0.405	ax
953	Mo	6	S	-2	2.331	0.37	j
954	Mo	6	F	-1	1.81	0.37	b
955	Mo	6	Cl	-1	2.28	0.37	b
956	Mo	6	N	-3	2.009	0.37	j
957	Mo	9	O	-2	1.879	0.3	z
958	Mo	9	Br	-1	2.43	0.37	b
959	Mo	9	I	-1	2.64	0.37	b
960	Mo	9	S	-2	2.35	0.37	b
961	Mo	9	Se	-2	2.49	0.37	b
962	Mo	9	Te	-2	2.69	0.37	b
963	Mo	9	N	-3	2.04	0.37	b
964	Mo	9	P	-3	2.44	0.37	b
965	Mo	9	As	-3	2.52	0.37	b
966	Mo	9	H	-1	1.73	0.37	b
967	N	3	O	-2	1.361	0.37	a
968	N	3	S	-2	1.73	0.37	e
969	N	3	F	-1	1.37	0.37	b
970	N	3	Cl	-1	1.75	0.37	b
971	N	3	N	-3	1.44	0.35	e
972	N	5	O	-2	1.432	0.37	a
973	N	5	O	-2	1.492	0.482	bs
974	N	5	O	-2	1.41	0.43	o
975	N	5	F	-1	1.36	0.37	b
976	N	5	Cl	-1	1.8	0.37	b
977	Na	1	O	-2	1.803	0.37	a
978	Na	1	O	-2	1.695	0.42	a
979	Na	1	O	-2	1.756	0.37	v
980	Na	1	O	-2	1.5766	0.475	c
981	Na	1	O	-2	1.661	0.44	o
982	Na	1	S	-2	2.3	0.37	a
983	Na	1	S	-2	2.28	0.37	b
984	Na	1	S	-2	1.8213	0.626	c
985	Na	1	Se	-2	2.41	0.37	b
986	Na	1	Se	-2	1.8908	0.654	c
987	Na	1	Te	-2	2.64	0.37	b
988	Na	1	Te	-2	2.04	0.69	c
989	Na	1	F	-1	1.677	0.37	a
990	Na	1	F	-1	1.4485	0.465	c
991	Na	1	Cl	-1	2.15	0.37	b
992	Na	1	Cl	-1	1.6833	0.608	c
993	Na	1	Cl	-1	2.22	0.37	e
994	Na	1	Br	-1	2.33	0.37	b
995	Na	1	Br	-1	1.7719	0.646	c
996	Na	1	I	-1	2.56	0.37	b
997	Na	1	I	-1	1.9555	0.695	c
998	Na	1	N	-3	1.93	0.37	b
999	Na	1	N	-3	2.01	0.37	e
1000	Na	1	P	-3	2.36	0.37	b
1001	Na	1	As	-3	2.53	0.37	b
1002	Na	1	H	-1	1.68	0.37	b
1003	Nb	3	O	-2	1.91	0.35	e
1004	Nb	3	F	-1	1.71	0.37	e
1005	Nb	3	Cl	-1	2.2	0.37	e
1006	Nb	3	Br	-1	2.35	0.37	e
1007	Nb	4	O	-2	1.853	0.479	bs
1008	Nb	4	O	-2	1.88	0.37	e
1009	Nb	4	F	-1	1.9	0.37	e
1010	Nb	4	Cl	-1	2.26	0.35	e
1011	Nb	4	Cl	-1	2.236	0.37	av
1012	Nb	4	Br	-1	2.62	0.37	e
1013	Nb	4	N	-3	2.004	0.37	av
1014	Nb	5	O	-2	1.911	0.37	a
1015	Nb	5	O	-2	1.909	0.369	bs
1016	Nb	5	O	-2	1.916	0.37	x
1017	Nb	5	F	-1	1.87	0.37	b
1018	Nb	5	Cl	-1	2.27	0.37	b
1019	Nb	5	I	-1	2.77	0.37	e
1020	Nb	5	N	-3	2.01	0.35	e
1021	Nb	9	Br	-1	2.45	0.37	b
1022	Nb	9	I	-1	2.68	0.37	b
1023	Nb	9	S	-2	2.37	0.37	b
1024	Nb	9	Se	-2	2.51	0.37	b
1025	Nb	9	Te	-2	2.7	0.37	b
1026	Nb	9	N	-3	2.06	0.37	b
1027	Nb	9	P	-3	2.46	0.37	b
1028	Nb	9	As	-3	2.54	0.37	b
1029	Nb	9	H	-1	1.75	0.37	b
1030	Nd	2	O	-2	1.95	0.37	e
1031	Nd	2	S	-2	2.6	0.35	e
1032	Nd	3	O	-2	2.021	0.46	bj
1033	Nd	3	O	-2	2.103	0.371	bs
1034	Nd	3	O	-2	2.105	0.37	a
1035	Nd	3	O	-2	2.117	0.37	b
1036	Nd	3	O	-2	2.086	0.37	ae
1037	Nd	3	S	-2	2.59	0.37	b
1038	Nd	3	S	-2	2.559	0.37	al
1039	Nd	3	Se	-2	2.71	0.37	b
1040	Nd	3	Te	-2	2.89	0.37	b
1041	Nd	3	F	-1	2.008	0.37	b
1042	Nd	3	F	-1	1.98	0.4	p
1043	Nd	3	Cl	-1	2.492	0.37	b
1044	Nd	3	Cl	-1	2.512	0.37	al
1045	Nd	3	Cl	-1	2.46	0.4	p
1046	Nd	3	Br	-1	2.66	0.37	b
1047	Nd	3	Br	-1	2.61	0.4	p
1048	Nd	3	I	-1	2.87	0.37	b
1049	Nd	3	I	-1	2.84	0.4	p
1050	Nd	3	N	-3	2.201	0.37	ah
1051	Nd	3	N	-3	2.3	0.37	b
1052	NH	1	O	-2	2.226	0.37	s
1053	NH	1	F	-1	2.129	0.37	s
1054	NH	1	Cl	-1	2.619	0.37	s
1055	Ni	2	O	-2	1.675	0.37	e
1056	Ni	2	O	-2	1.689	0.347	bs
1057	Ni	2	O	-2	1.67	0.37	j
1058	Ni	2	O	-2	1.654	0.37	a
1059	Ni	2	S	-2	1.98	0.37	e
1060	Ni	2	S	-2	1.937	0.37	j
1061	Ni	2	F	-1	1.596	0.37	a
1062	Ni	2	Cl	-1	2.02	0.37	b
1063	Ni	2	Br	-1	2.2	0.37	e
1064	Ni	2	I	-1	2.4	0.37	e
1065	Ni	2	N	-3	1.7	0.37	e
1066	Ni	2	N	-3	1.647	0.37	j
1067	Ni	3	O	-2	1.75	0.37	e
1068	Ni	3	S	-2	2.04	0.37	j
1069	Ni	3	F	-1	1.58	0.37	e
1070	Ni	3	N	-3	1.731	0.37	j
1071	Ni	4	O	-2	1.734	0.335	bs
1072	Ni	4	F	-1	1.61	0.37	e
1073	Ni	9	Br	-1	2.16	0.37	b
1074	Ni	9	I	-1	2.34	0.37	b
1075	Ni	9	S	-2	2.04	0.37	b
1076	Ni	9	Se	-2	2.14	0.37	b
1077	Ni	9	Te	-2	2.43	0.37	b
1078	Ni	9	N	-3	1.75	0.37	b
1079	Ni	9	P	-3	2.17	0.37	b
1080	Ni	9	As	-3	2.24	0.37	b
1081	Ni	9	H	-1	1.4	0.37	b
1082	Np	3	F	-1	2	0.4	p
1083	Np	3	Cl	-1	2.48	0.4	p
1084	Np	3	Br	-1	2.62	0.4	p
1085	Np	3	I	-1	2.85	0.4	p
1086	Np	4	O	-2	2.18	0.37	e
1087	Np	4	O	-2	2.11	0.35	p
1088	Np	4	F	-1	2.02	0.37	e
1089	Np	4	F	-1	1.98	0.4	p
1090	Np	4	Cl	-1	2.46	0.4	p
1091	Np	5	O	-2	2.036	0.411	bs
1092	Np	5	O	-2	2.09	0.35	p
1093	Np	5	F	-1	1.97	0.4	p
1094	Np	5	Cl	-1	2.42	0.4	p
1095	Np	6	O	-2	2.022	0.523	bs
1096	Np	6	O	-2	2.07	0.35	p
1097	Np	6	F	-1	1.97	0.4	p
1098	Np	7	O	-2	2.076	0.477	bs
1099	Np	7	O	-2	2.06	0.35	p
1100	O	2	O	-2	1.406	0.37	e
1101	Os	4	O	-2	1.811	0.37	b
1102	Os	4	S	-2	2.21	0.37	e
1103	Os	4	F	-1	1.72	0.37	b
1104	Os	4	Cl	-1	2.19	0.37	b
1105	Os	4	Br	-1	2.37	0.37	e
1106	Os	5	O	-2	1.87	0.485	bs
1107	Os	5	F	-1	1.81	0.37	e
1108	Os	6	O	-2	1.904	0.375	bs
1109	Os	6	O	-2	2.03	0.37	e
1110	Os	6	F	-1	1.8	0.35	e
1111	Os	7	O	-2	1.937	0.349	bs
1112	Os	8	O	-2	1.966	0.405	bs
1113	Os	8	O	-2	1.92	0.37	e
1114	P	3	O	-2	1.655	0.399	bs
1115	P	3	O	-2	1.63	0.37	e
1116	P	3	S	-2	2.12	0.37	e
1117	P	3	Se	-2	2.24	0.37	e
1118	P	3	F	-1	1.53	0.35	e
1119	P	4	O	-2	1.64	0.37	e
1120	P	4	S	-2	2.13	0.35	e
1121	P	4	F	-1	1.66	0.37	e
1122	P	5	O	-2	1.617	0.37	a
1123	P	5	O	-2	1.624	0.399	bs
1124	P	5	O	-2	1.615	0.37	au
1125	P	5	O	-2	1.604	0.37	b
1126	P	5	S	-2	2.145	0.37	a
1127	P	5	F	-1	1.54	0.37	e
1128	P	5	Cl	-1	2.02	0.37	e
1129	P	5	Br	-1	2.17	0.4	e
1130	P	5	N	-3	1.704	0.37	a
1131	P	9	Br	-1	2.15	0.37	b
1132	P	9	I	-1	2.4	0.37	b
1133	P	9	S	-2	2.11	0.37	b
1134	P	9	Se	-2	2.26	0.37	b
1135	P	9	Te	-2	2.44	0.37	b
1136	P	9	N	-3	1.73	0.37	b
1137	P	9	P	-3	2.19	0.37	b
1138	P	9	As	-3	2.25	0.37	b
1139	P	9	H	-1	1.41	0.37	b
1140	P	5	P	5	2.22	0.35	e
1141	Pa	4	O	-2	2.15	0.35	p
1142	Pa	4	F	-1	2.02	0.4	p
1143	Pa	4	Cl	-1	2.49	0.4	p
1144	Pa	4	Br	-1	2.66	0.4	p
1145	Pa	5	O	-2	2.09	0.35	e
1146	Pa	5	O	-2	2.11	0.35	p
1147	Pa	5	F	-1	2.04	0.37	e
1148	Pa	5	F	-1	2.01	0.4	p
1149	Pa	5	Cl	-1	2.45	0.4	p
1150	Pa	5	Br	-1	2.58	0.4	p
1151	Pb	2	O	-2	1.963	0.49	q
1152	Pb	2	O	-2	2.032	0.442	bs
1153	Pb	2	O	-2	2.112	0.37	a
1154	Pb	2	S	-2	2.42	0.5	e
1155	Pb	2	S	-2	2.541	0.37	a
1156	Pb	2	Se	-2	2.69	0.37	e
1157	Pb	2	F	-1	2.03	0.37	b
1158	Pb	2	F	-1	2.036	0.382	aq
1159	Pb	2	Cl	-1	2.53	0.37	b
1160	Pb	2	Cl	-1	2.447	0.4	aq
1161	Pb	2	Br	-1	2.598	0.4	aq
1162	Pb	2	Br	-1	2.68	0.37	e
1163	Pb	2	I	-1	2.83	0.37	e
1164	Pb	2	I	-1	2.804	0.386	aq
1165	Pb	2	N	-3	2.18	0.4	e
1166	Pb	4	O	-2	2.042	0.37	a
1167	Pb	4	O	-2	2.056	0.28	bs
1168	Pb	4	F	-1	1.94	0.37	b
1169	Pb	4	Cl	-1	2.43	0.37	b
1170	Pb	4	Cl	-1	2.36	0.37	e
1171	Pb	4	Br	-1	3.04	0.35	e
1172	Pb	9	Br	-1	2.64	0.37	b
1173	Pb	9	I	-1	2.78	0.37	b
1174	Pb	9	S	-2	2.55	0.37	b
1175	Pb	9	Se	-2	2.67	0.37	b
1176	Pb	9	Te	-2	2.84	0.37	b
1177	Pb	9	N	-3	2.22	0.37	b
1178	Pb	9	P	-3	2.64	0.37	b
1179	Pb	9	As	-3	2.72	0.37	b
1180	Pb	9	H	-1	1.97	0.37	b
1181	Pd	2	O	-2	1.792	0.37	b
1182	Pd	2	O	-2	1.749	0.375	bs
1183	Pd	2	S	-2	2.09	0.37	e
1184	Pd	2	F	-1	1.74	0.37	b
1185	Pd	2	Cl	-1	2.05	0.37	b
1186	Pd	2	Br	-1	2.2	0.37	e
1187	Pd	2	I	-1	2.36	0.37	e
1188	Pd	2	N	-3	1.82	0.35	e
1189	Pd	2	C	-4	1.73	0.37	e
1190	Pd	4	O	-2	1.856	0.352	bs
1191	Pd	4	S	-2	2.3	0.37	e
1192	Pd	4	F	-1	1.66	0.37	e
1193	Pd	9	Br	-1	2.19	0.37	b
1194	Pd	9	I	-1	2.38	0.37	b
1195	Pd	9	S	-2	2.1	0.37	b
1196	Pd	9	Se	-2	2.22	0.37	b
1197	Pd	9	Te	-2	2.48	0.37	b
1198	Pd	9	N	-3	1.81	0.37	b
1199	Pd	9	P	-3	2.22	0.37	b
1200	Pd	9	As	-3	2.3	0.37	b
1201	Pd	9	H	-1	1.47	0.37	b
1202	Pm	3	F	-1	1.96	0.4	p
1203	Pm	3	Cl	-1	2.45	0.4	p
1204	Pm	3	Br	-1	2.59	0.4	p
1205	Pm	3	Cl	-1	2.82	0.4	p
1206	Po	4	O	-2	2.19	0.37	e
1207	Po	4	F	-1	2.38	0.37	e
1208	Pr	3	O	-2	2.138	0.37	a
1209	Pr	3	O	-2	2.071	0.411	bs
1210	Pr	3	O	-2	2.098	0.37	ae
1211	Pr	3	S	-2	2.6	0.37	b
1212	Pr	3	S	-2	2.594	0.37	al
1213	Pr	3	Se	-1	2.72	0.37	b
1214	Pr	3	Te	-2	2.9	0.37	b
1215	Pr	3	F	-1	2.022	0.37	b
1216	Pr	3	F	-1	1.99	0.4	p
1217	Pr	3	Cl	-1	2.5	0.37	b
1218	Pr	3	Cl	-1	2.521	0.37	al
1219	Pr	3	Cl	-1	2.47	0.4	p
1220	Pr	3	Br	-1	2.67	0.37	b
1221	Pr	3	Br	-1	2.63	0.4	p
1222	Pr	3	I	-1	2.89	0.37	b
1223	Pr	3	I	-1	2.85	0.4	p
1224	Pr	3	N	-3	2.215	0.37	ah
1225	Pr	3	N	-3	2.3	0.37	b
1226	Pr	3	P	-3	2.68	0.37	b
1227	Pr	3	As	-3	2.75	0.37	b
1228	Pr	3	H	-1	2.02	0.37	b
1229	Pt	2	O	-2	1.768	0.37	b
1230	Pt	2	O	-2	1.742	0.375	bs
1231	Pt	2	O	-2	1.8	0.37	e
1232	Pt	2	S	-2	2.16	0.37	e
1233	Pt	2	F	-1	1.68	0.37	b
1234	Pt	2	Cl	-1	2.05	0.37	b
1235	Pt	2	Br	-1	2.2	0.37	e
1236	Pt	2	C	2	1.76	0.37	a
1237	Pt	2	N	-3	1.81	0.37	e
1238	Pt	3	O	-2	1.856	0.407	bs
1239	Pt	3	O	-2	1.87	0.37	e
1240	Pt	3	Cl	-1	2.3	0.37	e
1241	Pt	3	Br	-1	2.47	0.35	e
1242	Pt	4	O	-2	1.879	0.37	a
1243	Pt	4	F	-1	1.759	0.37	b
1244	Pt	4	F	-1	2.19	0.37	e
1245	Pt	4	Cl	-1	2.17	0.37	b
1246	Pt	4	Cl	-1	2.32	0.37	e
1247	Pt	4	Br	-1	2.6	0.35	e
1248	Pt	9	Br	-1	2.18	0.37	b
1249	Pt	9	I	-1	2.37	0.37	b
1250	Pt	9	S	-2	2.08	0.37	b
1251	Pt	9	Se	-2	2.19	0.37	b
1252	Pt	9	Te	-2	2.45	0.37	b
1253	Pt	9	N	-3	1.77	0.37	b
1254	Pt	9	P	-3	2.19	0.37	b
1255	Pt	9	As	-3	2.26	0.37	b
1256	Pt	9	H	-1	1.4	0.37	b
1257	Pu	3	O	-2	2.11	0.37	b
1258	Pu	3	O	-2	2.14	0.35	p
1259	Pu	3	F	-1	2	0.37	b
1260	Pu	3	F	-1	1.99	0.4	p
1261	Pu	3	Cl	-1	2.48	0.37	b
1262	Pu	3	Cl	-1	2.46	0.4	p
1263	Pu	3	Br	-1	2.6	0.4	p
1264	Pu	3	I	-1	2.84	0.4	p
1265	Pu	4	O	-2	2.09	0.35	p
1266	Pu	4	O	-2	2.068	0.385	bf
1267	Pu	4	F	-1	1.97	0.4	p
1268	Pu	4	Cl	-1	2.44	0.4	p
1269	Pu	5	O	-2	2.11	0.37	e
1270	Pu	5	O	-2	2.08	0.35	p
1271	Pu	5	F	-1	1.96	0.4	p
1272	Pu	6	O	-2	2.06	0.35	p
1273	Pu	6	F	-1	1.96	0.4	p
1274	Pu	7	O	-2	2.05	0.35	p
1275	Rb	1	O	-2	2.263	0.37	a
1276	Rb	1	O	-2	1.993	0.478	bs
1277	Rb	1	O	-2	2.0812	0.415	c
1278	Rb	1	S	-2	2.7	0.37	b
1279	Rb	1	S	-2	2.2991	0.553	c
1280	Rb	1	S	-2	2.8	0.37	e
1281	Rb	1	Se	-2	2.81	0.37	b
1282	Rb	1	Se	-2	2.3886	0.587	c
1283	Rb	1	Te	-2	3	0.37	b
1284	Rb	1	Te	-2	2.4175	0.633	c
1285	Rb	1	F	-1	2.16	0.37	b
1286	Rb	1	F	-1	1.9718	0.412	c
1287	Rb	1	F	-1	2.2	0.37	e
1288	Rb	1	Cl	-1	2.652	0.37	a
1289	Rb	1	Cl	-1	2.2653	0.531	c
1290	Rb	1	Br	-1	2.78	0.37	b
1291	Rb	1	Br	-1	2.3296	0.578	c
1292	Rb	1	Br	-1	2.86	0.37	e
1293	Rb	1	I	-1	3.01	0.37	b
1294	Rb	1	I	-1	2.4509	0.638	c
1295	Rb	1	I	-1	3.12	0.37	e
1296	Rb	1	N	-3	2.62	0.37	e
1297	Rb	1	N	-3	2.37	0.37	b
1298	Rb	1	P	-3	2.76	0.37	b
1299	Rb	1	As	-3	2.87	0.37	b
1300	Rb	1	H	-1	2.26	0.37	b
1301	Re	1	Cl	-1	2.62	0.35	e
1302	Re	3	O	-2	1.9	0.35	e
1303	Re	3	Cl	-1	2.23	0.37	e
1304	Re	4	F	-1	1.81	0.37	e
1305	Re	4	Cl	-1	2.23	0.37	e
1306	Re	4	Br	-1	2.35	0.37	e
1307	Re	5	O	-2	1.834	0.557	bs
1308	Re	5	O	-2	1.86	0.37	e
1309	Re	5	Cl	-1	2.24	0.37	e
1310	Re	6	F	-1	1.79	0.37	e
1311	Re	7	O	-2	1.943	0.406	bs
1312	Re	7	O	-2	1.97	0.37	e
1313	Re	7	F	-1	1.86	0.37	b
1314	Re	7	Cl	-1	2.23	0.37	b
1315	Re	9	Br	-1	2.45	0.37	b
1316	Re	9	I	-1	2.61	0.37	b
1317	Re	9	S	-2	2.37	0.37	b
1318	Re	9	Se	-2	2.5	0.37	b
1319	Re	9	Te	-2	2.7	0.37	b
1320	Re	9	N	-3	2.06	0.37	b
1321	Re	9	P	-3	2.46	0.37	b
1322	Re	9	As	-3	2.54	0.37	b
1323	Re	9	H	-1	1.75	0.37	b
1324	Rh	3	O	-2	1.793	0.37	b
1325	Rh	3	O	-2	1.769	0.369	bs
1326	Rh	3	F	-1	1.71	0.37	b
1327	Rh	3	Cl	-1	2.08	0.37	e
1328	Rh	3	Cl	-1	2.17	0.37	b
1329	Rh	3	Br	-1	2.27	0.35	e
1330	Rh	3	N	-3	1.82	0.35	e
1331	Rh	4	O	-2	2.836	0.422	bs
1332	Rh	4	F	-1	1.59	0.37	e
1333	Rh	5	F	-1	1.8	0.37	e
1334	Rh	9	Br	-1	2.25	0.37	b
1335	Rh	9	I	-1	2.48	0.37	b
1336	Rh	9	S	-2	2.15	0.37	b
1337	Rh	9	Se	-1	2.33	0.37	b
1338	Rh	9	Te	-2	2.55	0.37	b
1339	Rh	9	N	-3	1.88	0.37	b
1340	Rh	9	P	-3	2.29	0.37	b
1341	Rh	9	As	-3	2.37	0.37	b
1342	Rh	9	H	-1	1.55	0.37	b
1343	Ru	2	Se	-2	2.11	0.35	e
1344	Ru	2	F	-1	1.84	0.35	e
1345	Ru	3	O	-2	1.77	0.37	o
1346	Ru	3	O	-2	1.745	0.401	bs
1347	Ru	3	S	-2	2.2	0.35	e
1348	Ru	3	F	-1	2.12	0.37	e
1349	Ru	3	Cl	-1	2.25	0.37	e
1350	Ru	3	N	-3	1.82	0.35	e
1351	Ru	4	O	-2	1.833	0.366	bs
1352	Ru	4	O	-2	1.834	0.37	b
1353	Ru	4	S	-2	2.21	0.37	e
1354	Ru	4	F	-1	1.74	0.37	b
1355	Ru	4	Cl	-1	2.21	0.37	b
1356	Ru	5	O	-2	1.9	0.37	o
1357	Ru	5	O	-2	1.894	0.346	bs
1358	Ru	5	F	-1	1.82	0.37	e
1359	Ru	5	Cl	-1	2.23	0.35	e
1360	Ru	6	O	-2	1.87	0.35	e
1361	Ru	7	O	-2	1.99	0.37	e
1362	Ru	9	Br	-1	2.26	0.37	b
1363	Ru	9	I	-1	2.48	0.37	b
1364	Ru	9	S	-2	2.16	0.37	b
1365	Ru	9	Se	-2	2.33	0.37	b
1366	Ru	9	Te	-2	2.54	0.37	b
1367	Ru	9	N	-3	1.88	0.37	b
1368	Ru	9	P	-3	2.29	0.37	b
1369	Ru	9	As	-3	2.36	0.37	b
1370	Ru	9	H	-1	1.61	0.37	b
1371	S	2	O	-2	1.74	0.37	e
1372	S	2	S	-2	2.03	0.37	e
1373	S	2	N	-2	1.597	0.37	a
1374	S	2	N	-3	1.682	0.37	a
1375	S	2	S	2	2.1	0.35	e
1376	S	4	O	-2	1.644	0.37	a
1377	S	4	O	-2	1.643	0.399	bs
1378	S	4	S	-4	2.35	0.37	e
1379	S	4	F	-1	1.6	0.37	b
1380	S	4	Cl	-1	2.02	0.37	b
1381	S	4	N	-3	1.762	0.37	a
1382	S	6	O	-2	1.624	0.37	a
1383	S	6	O	-2	1.634	0.399	bs
1384	S	6	F	-1	1.56	0.37	b
1385	S	6	Cl	-1	2.03	0.37	b
1386	S	6	N	-3	1.72	0.37	e
1387	S	9	Br	-1	2.17	0.37	b
1388	S	9	I	-1	2.36	0.37	b
1389	S	9	S	-2	2.07	0.37	b
1390	S	9	Se	-2	2.21	0.37	b
1391	S	9	Te	-2	2.45	0.37	b
1392	S	9	N	-3	1.74	0.37	b
1393	S	9	P	-3	2.15	0.37	b
1394	S	9	As	-3	2.25	0.37	b
1395	S	9	H	-1	1.38	0.37	b
1396	Sb	3	O	-2	1.885	0.53	bj
1397	Sb	3	O	-2	1.927	0.446	bg
1398	Sb	3	O	-2	1.925	0.455	be
1399	Sb	3	O	-2	1.932	0.435	bs
1400	Sb	3	O	-2	1.924	0.47	bd
1401	Sb	3	O	-2	1.955	0.37	an
1402	Sb	3	S	-2	2.38	0.5	e
1403	Sb	3	S	-2	2.474	0.37	a
1404	Sb	3	Se	-2	2.6	0.37	e
1405	Sb	3	F	-1	1.883	0.37	a
1406	Sb	3	F	-1	1.9	0.37	b
1407	Sb	3	Cl	-1	2.35	0.37	b
1408	Sb	3	Br	-1	2.51	0.37	e
1409	Sb	3	I	-1	2.76	0.37	e
1410	Sb	3	N	-3	2.108	0.37	d
1411	Sb	5	O	-2	1.904	0.43	be
1412	Sb	5	O	-2	1.892	0.475	bs
1413	Sb	5	O	-2	1.912	0.37	an
1414	Sb	5	O	-2	1.908	0.409	aw
1415	Sb	5	F	-1	1.797	0.37	a
1416	Sb	5	Cl	-1	2.3	0.37	b
1417	Sb	5	Br	-1	2.48	0.37	e
1418	Sb	5	N	-3	1.99	0.35	e
1419	Sb	9	O	-2	1.934	0.37	an
1420	Sb	9	S	-2	2.45	0.37	b
1421	Sb	9	Se	-2	2.57	0.37	b
1422	Sb	9	Te	-2	2.78	0.37	b
1423	Sb	9	Br	-1	2.5	0.37	b
1424	Sb	9	I	-1	2.72	0.37	b
1425	Sb	9	N	-3	2.12	0.37	b
1426	Sb	9	P	-3	2.52	0.37	b
1427	Sb	9	As	-3	2.6	0.37	b
1428	Sb	9	H	-1	2.77	0.37	b
1429	Sc	3	O	-2	1.849	0.37	a
1430	Sc	3	O	-2	1.78	0.452	bs
1431	Sc	3	O	-2	1.877	0.35	o
1432	Sc	3	S	-2	2.321	0.37	a
1433	Sc	3	Se	-2	2.44	0.37	b
1434	Sc	3	Te	-2	2.64	0.37	b
1435	Sc	3	F	-1	1.76	0.37	b
1436	Sc	3	Cl	-1	2.36	0.37	e
1437	Sc	3	Cl	-1	2.23	0.37	b
1438	Sc	3	Br	-1	2.38	0.37	b
1439	Sc	3	I	-1	2.59	0.37	b
1440	Sc	3	N	-3	1.98	0.37	b
1441	Sc	3	P	-3	2.4	0.37	b
1442	Sc	3	As	-3	2.48	0.37	b
1443	Sc	3	H	-1	1.68	0.37	b
1444	Se	2	S	-2	2.21	0.37	e
1445	Se	2	Se	-2	2.33	0.37	e
1446	Se	4	O	-2	1.811	0.37	a
1447	Se	4	O	-2	1.805	0.401	bs
1448	Se	4	F	-1	1.73	0.37	b
1449	Se	4	Cl	-1	2.22	0.37	b
1450	Se	4	Br	-1	2.43	0.37	e
1451	Se	6	O	-2	1.788	0.37	a
1452	Se	6	O	-2	1.797	0.399	bs
1453	Se	6	F	-1	1.69	0.37	b
1454	Se	6	Cl	-1	2.16	0.37	b
1455	Se	6	N	-3	1.9	0.35	e
1456	Se	9	Br	-1	2.33	0.37	b
1457	Se	9	I	-1	2.54	0.37	b
1458	Se	9	S	-2	2.25	0.37	b
1459	Se	9	Se	-2	2.36	0.37	b
1460	Se	9	Te	-2	2.55	0.37	b
1461	Se	9	P	-3	2.34	0.37	b
1462	Se	9	As	-3	2.42	0.37	b
1463	Se	9	H	-1	1.54	0.37	b
1464	Si	4	O	-2	1.624	0.37	b
1465	Si	4	O	-2	1.622	0.37	au
1466	Si	4	O	-2	1.64	0.37	a
1467	Si	4	O	-2	1.624	0.389	bs
1468	Si	4	S	-2	2.126	0.37	a
1469	Si	4	Se	-2	2.26	0.37	b
1470	Si	4	Te	-2	2.49	0.37	b
1471	Si	4	F	-1	1.58	0.37	b
1472	Si	4	Cl	-1	2.03	0.37	b
1473	Si	4	Br	-1	2.2	0.37	b
1474	Si	4	I	-1	2.41	0.37	b
1475	Si	4	C	-4	1.883	0.37	a
1476	Si	4	N	-3	1.724	0.37	a
1477	Si	4	N	-3	1.77	0.37	b
1478	Si	4	P	-3	2.23	0.37	b
1479	Si	4	As	-3	2.31	0.37	b
1480	Si	4	H	-1	1.47	0.37	b
1481	Sm	2	O	-2	2.116	0.37	ai
1482	Sm	2	O	-2	2.126	0.37	al
1483	Sm	2	N	-3	2.267	0.37	al
1484	Sm	3	O	-2	2.088	0.37	b
1485	Sm	3	O	-2	2.049	0.404	bs
1486	Sm	3	O	-2	2.063	0.37	ae
1487	Sm	3	O	-2	2.055	0.37	ai
1488	Sm	3	S	-2	2.55	0.37	b
1489	Sm	3	S	-2	2.538	0.37	al
1490	Sm	3	Se	-2	2.67	0.37	b
1491	Sm	3	Te	-2	2.86	0.37	b
1492	Sm	3	F	-1	1.94	0.4	p
1493	Sm	3	F	-1	2	0.37	e
1494	Sm	3	Cl	-1	2.466	0.37	b
1495	Sm	3	Cl	-1	2.481	0.37	al
1496	Sm	3	Cl	-1	2.43	0.4	p
1497	Sm	3	Br	-1	2.66	0.37	b
1498	Sm	3	Br	-1	2.58	0.4	p
1499	Sm	3	I	-1	2.84	0.37	b
1500	Sm	3	I	-1	2.8	0.4	p
1501	Sm	3	N	-3	2.171	0.37	ah
1502	Sm	3	N	-3	2.24	0.37	b
1503	Sm	3	P	-3	2.63	0.37	b
1504	Sm	3	As	-3	2.7	0.37	b
1505	Sm	3	H	-1	1.96	0.37	b
1506	Sn	2	O	-2	1.849	0.5	bd
1507	Sn	2	O	-2	1.859	0.55	bh
1508	Sn	2	O	-2	1.91	0.451	bs
1509	Sn	2	O	-2	1.984	0.37	b
1510	Sn	2	O	-2	1.956	0.37	bn
1511	Sn	2	S	-2	2.35	0.5	e
1512	Sn	2	S	-2	2.423	0.37	bn
1513	Sn	2	Se	-2	2.476	0.37	bn
1514	Sn	2	Te	-2	2.747	0.37	bn
1515	Sn	2	F	-1	1.925	0.37	a
1516	Sn	2	F	-1	1.869	0.37	bn
1517	Sn	2	Cl	-1	2.335	0.43	bi
1518	Sn	2	Cl	-1	2.33	0.37	bn
1519	Sn	2	Cl	-1	2.36	0.37	b
1520	Sn	2	Br	-1	2.5	0.37	bn
1521	Sn	2	I	-1	2.752	0.37	bn
1522	Sn	2	N	-3	2.046	0.37	bn
1523	Sn	2	P	-3	2.488	0.37	bn
1524	Sn	2	As	-3	2.585	0.37	bn
1525	Sn	2	C	-4	2.077	0.37	bn
1526	Sn	4	O	-2	1.905	0.37	a
1527	Sn	4	O	-2	1.946	0.274	bs
1528	Sn	4	S	-2	2.399	0.37	a
1529	Sn	4	S	-2	2.393	0.37	bn
1530	Sn	4	Se	-2	2.524	0.37	bn
1531	Sn	4	F	-1	1.843	0.37	a
1532	Sn	4	F	-1	1.802	0.37	bn
1533	Sn	4	Cl	-1	2.276	0.37	a
1534	Sn	4	Br	-1	2.444	0.37	bn
1535	Sn	4	I	-1	2.7	0.37	bn
1536	Sn	4	N	-3	2.024	0.37	bn
1537	Sn	9	Br	-1	2.55	0.37	b
1538	Sn	9	I	-1	2.76	0.37	b
1539	Sn	9	S	-2	2.39	0.37	aa
1540	Sn	9	S	-2	2.45	0.37	b
1541	Sn	9	Se	-2	2.59	0.37	b
1542	Sn	9	Te	-2	2.76	0.37	b
1543	Sn	9	N	-3	2.06	0.37	aa
1544	Sn	9	N	-3	2.14	0.37	b
1545	Sn	9	P	-3	2.45	0.37	b
1546	Sn	9	As	-3	2.62	0.37	b
1547	Sn	9	H	-1	1.85	0.37	b
1548	Sr	2	O	-2	2.118	0.37	a
1549	Sr	2	O	-2	1.958	0.479	bs
1550	Sr	2	S	-2	2.59	0.37	b
1551	Sr	2	S	-2	2.65	0.37	e
1552	Sr	2	Se	-2	2.72	0.37	b
1553	Sr	2	Te	-2	2.87	0.37	b
1554	Sr	2	Te	-2	2.06	0.37	e
1555	Sr	2	F	-1	2.019	0.37	b
1556	Sr	2	Cl	-1	2.51	0.37	b
1557	Sr	2	Br	-1	2.68	0.37	b
1558	Sr	2	I	-1	2.88	0.37	b
1559	Sr	2	N	-3	2.23	0.37	b
1560	Sr	2	P	-3	2.67	0.37	b
1561	Sr	2	As	-3	2.76	0.37	b
1562	Sr	2	H	-1	2.01	0.37	b
1563	Ta	4	O	-2	2.29	0.37	e
1564	Ta	5	O	-2	1.92	0.37	a
1565	Ta	5	O	-2	1.916	0.343	bs
1566	Ta	5	S	-2	2.47	0.37	e
1567	Ta	5	F	-1	1.88	0.37	b
1568	Ta	5	Cl	-1	2.3	0.37	b
1569	Ta	9	Br	-1	2.45	0.37	b
1570	Ta	9	I	-1	2.66	0.37	b
1571	Ta	9	S	-2	2.39	0.37	b
1572	Ta	9	Se	-2	2.51	0.37	b
1573	Ta	9	Te	-2	2.7	0.37	b
1574	Ta	9	N	-3	2.01	0.37	b
1575	Ta	9	P	-3	2.47	0.37	b
1576	Ta	9	As	-3	2.55	0.37	b
1577	Ta	9	H	-1	1.76	0.37	b
1578	Tb	3	O	-2	2.032	0.37	a
1579	Tb	3	O	-2	2.049	0.37	b
1580	Tb	3	O	-2	2.02	0.379	bs
1581	Tb	3	O	-2	2.013	0.37	ae
1582	Tb	3	S	-2	2.51	0.37	b
1583	Tb	3	S	-2	2.498	0.37	al
1584	Tb	3	Se	-2	2.63	0.37	b
1585	Tb	3	Te	-2	2.82	0.37	b
1586	Tb	3	F	-1	1.936	0.37	b
1587	Tb	3	F	-1	1.9	0.4	p
1588	Tb	3	Cl	-1	2.427	0.37	b
1589	Tb	3	Cl	-1	2.437	0.37	al
1590	Tb	3	Cl	-1	2.39	0.4	p
1591	Tb	3	Br	-1	2.58	0.37	b
1592	Tb	3	Br	-1	2.54	0.4	p
1593	Tb	3	I	-1	2.8	0.37	b
1594	Tb	3	I	-1	2.77	0.4	p
1595	Tb	3	N	-3	2.13	0.37	ah
1596	Tb	3	N	-3	2.2	0.37	b
1597	Tb	3	P	-3	2.59	0.37	b
1598	Tb	3	As	-3	2.66	0.37	b
1599	Tb	3	H	-1	1.91	0.37	b
1600	Tb	4	O	-2	2.018	0.395	bs
1601	Tc	3	O	-2	1.768	0.37	as
1602	Tc	4	O	-2	1.841	0.37	as
1603	Tc	4	F	-1	1.88	0.4	p
1604	Tc	4	Cl	-1	2.21	0.37	e
1605	Tc	5	O	-2	1.859	0.37	as
1606	Tc	5	O	-2	1.87	0.37	as
1607	Tc	6	O	-2	1.955	0.37	as
1608	Tc	7	O	-2	1.909	0.37	as
1609	Tc	7	O	-2	1.915	0.375	bs
1610	Te	4	O	-2	1.955	0.44	bd
1611	Te	4	O	-2	1.96	0.389	bs
1612	Te	4	O	-2	1.96	0.41	bk
1613	Te	4	O	-2	1.977	0.37	a
1614	Te	4	S	-2	2.44	0.37	e
1615	Te	4	F	-1	1.87	0.37	b
1616	Te	4	Cl	-1	2.312	0.56	bk
1617	Te	4	Cl	-1	2.37	0.37	b
1618	Te	4	Br	-1	2.55	0.37	e
1619	Te	4	I	-1	2.782	0.37	bp
1620	Te	6	O	-2	1.917	0.37	a
1621	Te	6	O	-2	1.922	0.387	bs
1622	Te	6	O	-2	1.921	0.56	bk
1623	Te	6	F	-1	1.82	0.37	b
1624	Te	6	Cl	-1	2.3	0.37	b
1625	Te	9	Br	-1	2.53	0.37	b
1626	Te	9	I	-1	2.76	0.37	b
1627	Te	9	S	-2	2.45	0.37	b
1628	Te	9	Se	-2	2.53	0.37	b
1629	Te	9	Te	-2	2.76	0.37	b
1630	Te	9	N	-3	2.12	0.37	b
1631	Te	9	P	-3	2.52	0.37	b
1632	Te	9	As	-3	2.6	0.37	b
1633	Te	9	H	-1	1.83	0.37	b
1634	Th	4	O	-2	2.167	0.37	b
1635	Th	4	O	-2	2.117	0.42	bs
1636	Th	4	O	-2	2.18	0.35	p
1637	Th	4	S	-2	2.64	0.37	b
1638	Th	4	Se	-2	2.76	0.37	b
1639	Th	4	Te	-2	2.94	0.37	b
1640	Th	4	F	-1	2.068	0.37	a
1641	Th	4	F	-1	2.05	0.4	p
1642	Th	4	Cl	-1	2.55	0.37	b
1643	Th	4	Cl	-1	2.52	0.4	p
1644	Th	4	Br	-1	2.71	0.37	b
1645	Th	4	Br	-1	2.68	0.4	p
1646	Th	4	I	-1	2.93	0.37	b
1647	Th	4	I	-1	2.92	0.4	p
1648	Th	4	I	-1	2.96	0.37	e
1649	Th	4	N	-3	2.34	0.37	b
1650	Th	4	P	-3	2.73	0.37	b
1651	Th	4	As	-3	2.8	0.37	b
1652	Th	4	H	-1	2.07	0.37	b
1653	Ti	2	F	-1	2.15	0.37	e
1654	Ti	2	Cl	-1	2.31	0.37	e
1655	Ti	2	Br	-1	2.49	0.37	e
1656	Ti	3	O	-2	1.654	0.545	bs
1657	Ti	3	O	-2	1.791	0.37	b
1658	Ti	3	S	-2	2.11	0.37	e
1659	Ti	3	F	-1	1.723	0.37	b
1660	Ti	3	Cl	-1	2.22	0.37	e
1661	Ti	3	Cl	-1	2.17	0.37	b
1662	Ti	3	I	-1	2.52	0.37	e
1663	Ti	4	O	-2	1.815	0.37	a
1664	Ti	4	O	-2	1.819	0.342	bs
1665	Ti	4	O	-2	1.78	0.43	o
1666	Ti	4	S	-2	2.29	0.37	e
1667	Ti	4	F	-1	1.76	0.37	b
1668	Ti	4	Cl	-1	2.19	0.37	b
1669	Ti	4	Br	-1	2.36	0.37	e
1670	Ti	9	O	-2	1.79	0.37	k
1671	Ti	9	Cl	-1	2.184	0.37	k
1672	Ti	9	Br	-1	2.32	0.37	b
1673	Ti	9	I	-1	2.54	0.37	b
1674	Ti	9	S	-2	2.24	0.37	b
1675	Ti	9	Se	-2	2.38	0.37	b
1676	Ti	9	Te	-2	2.6	0.37	b
1677	Ti	9	N	-3	1.93	0.37	b
1678	Ti	9	N	-3	1.906	0.37	k
1679	Ti	9	P	-3	2.36	0.37	b
1680	Ti	9	As	-3	2.42	0.37	b
1681	Ti	9	H	-1	1.61	0.37	b
1682	Tl	1	O	-2	2.124	0.37	a
1683	Tl	1	O	-2	2.063	0.422	bs
1684	Tl	1	O	-2	2.172	0.37	b
1685	Tl	1	O	-2	2.162	0.37	bm
1686	Tl	1	O	-2	1.927	0.5	af
1687	Tl	1	S	-2	2.545	0.37	a
1688	Tl	1	F	-1	2.15	0.37	b
1689	Tl	1	Cl	-1	2.56	0.37	b
1690	Tl	1	Cl	-1	2.61	0.37	e
1691	Tl	1	Br	-1	2.69	0.37	e
1692	Tl	1	I	-1	2.822	0.37	a
1693	Tl	1	N	-3	2.286	0.37	bm
1694	Tl	3	O	-2	2.003	0.37	b
1695	Tl	3	O	-2	1.874	0.504	bs
1696	Tl	3	O	-2	2.162	0.37	bm
1697	Tl	3	F	-1	1.88	0.37	b
1698	Tl	3	Cl	-1	2.32	0.37	b
1699	Tl	3	Br	-1	2.65	0.35	e
1700	Tl	3	N	-3	2.014	0.37	bm
1701	Tl	9	Br	-1	2.7	0.37	b
1702	Tl	9	I	-1	2.91	0.37	b
1703	Tl	9	S	-2	2.63	0.37	b
1704	Tl	9	Se	-2	2.7	0.37	b
1705	Tl	9	Te	-2	2.93	0.37	b
1706	Tl	9	N	-3	2.29	0.37	b
1707	Tl	9	P	-3	2.71	0.37	b
1708	Tl	9	As	-3	2.79	0.37	b
1709	Tl	9	H	-1	2.05	0.37	b
1710	Tm	3	O	-2	2	0.37	b
1711	Tm	3	O	-2	1.997	0.381	bs
1712	Tm	3	O	-2	1.968	0.37	ae
1713	Tm	3	S	-2	2.45	0.37	b
1714	Tm	3	Se	-2	2.58	0.37	b
1715	Tm	3	Te	-2	2.77	0.37	b
1716	Tm	3	F	-1	1.842	0.37	b
1717	Tm	3	F	-1	1.86	0.4	p
1718	Tm	3	F	-1	1.91	0.37	e
1719	Tm	3	Cl	-1	2.38	0.37	b
1720	Tm	3	Cl	-1	2.381	0.37	al
1721	Tm	3	Cl	-1	2.35	0.4	p
1722	Tm	3	Br	-1	2.53	0.37	b
1723	Tm	3	Br	-1	2.5	0.4	p
1724	Tm	3	I	-1	2.74	0.37	b
1725	Tm	3	I	-1	2.74	0.4	p
1726	Tm	3	N	-3	2.14	0.37	b
1727	Tm	3	P	-3	2.53	0.37	b
1728	Tm	3	As	-3	2.62	0.37	b
1729	Tm	3	H	-1	1.85	0.37	b
1730	U	2	O	-2	2.08	0.37	e
1731	U	3	S	-2	2.54	0.37	e
1732	U	3	F	-1	2.02	0.4	p
1733	U	3	F	-1	2.09	0.37	e
1734	U	3	Cl	-1	2.49	0.4	p
1735	U	3	Br	-1	2.64	0.4	p
1736	U	3	I	-1	2.87	0.4	p
1737	U	4	O	-2	2.112	0.37	b
1738	U	4	O	-2	2.1	0.373	bs
1739	U	4	O	-2	2.13	0.35	p
1740	U	4	S	-2	2.55	0.37	e
1741	U	4	F	-1	2.038	0.37	a
1742	U	4	F	-1	2.034	0.37	b
1743	U	4	F	-1	2	0.4	p
1744	U	4	Cl	-1	2.47	0.4	p
1745	U	4	Br	-1	2.6	0.4	p
1746	U	4	Br	-1	2.61	0.37	e
1747	U	4	I	-1	2.88	0.37	e
1748	U	4	N	-3	2.18	0.37	e
1749	U	5	O	-2	2.075	0.37	b
1750	U	5	O	-2	2.009	0.66	bs
1751	U	5	O	-2	2.1	0.35	p
1752	U	5	F	-1	1.966	0.37	b
1753	U	5	F	-1	1.99	0.4	p
1754	U	5	Cl	-1	2.46	0.37	b
1755	U	5	Cl	-1	2.43	0.4	p
1756	U	5	Br	-1	2.7	0.35	e
1757	U	6	O	-2	2.051	0.519	r
1758	U	6	O	-2	2.046	0.473	bs
1759	U	6	O	-2	2.045	0.519	bo
1760	U	6	O	-2	2.075	0.37	a
1761	U	6	O	-2	2.08	0.35	p
1762	U	6	F	-1	1.98	0.4	p
1763	U	6	Cl	-1	2.42	0.4	p
1764	U	6	N	-3	1.93	0.35	e
1765	U	9	Br	-1	2.63	0.37	b
1766	U	9	I	-1	2.84	0.37	b
1767	U	9	S	-2	2.56	0.37	b
1768	U	9	Se	-2	2.7	0.37	b
1769	U	9	Te	-2	2.86	0.37	b
1770	U	9	N	-3	2.24	0.37	b
1771	U	9	P	-3	2.64	0.37	b
1772	U	9	As	-3	2.72	0.37	b
1773	U	9	H	-1	1.97	0.37	b
1774	V	1	O	-2	1.88	0.37	e
1775	V	1	Cl	-1	2	0.35	e
1776	V	2	O	-2	1.7	0.37	e
1777	V	2	S	-2	2.11	0.37	e
1778	V	2	F	-1	2.16	0.37	e
1779	V	2	Cl	-1	2.44	0.37	e
1780	V	3	O	-2	1.743	0.37	a
1781	V	3	O	-2	1.718	0.412	bs
1782	V	3	O	-2	1.749	0.37	j
1783	V	3	S	-2	2.17	0.37	e
1784	V	3	S	-2	2.185	0.37	j
1785	V	3	F	-1	1.702	0.37	b
1786	V	3	Cl	-1	2.19	0.37	b
1787	V	3	Br	-1	2.33	0.35	e
1788	V	3	N	-3	1.813	0.37	j
1789	V	3	N	-3	1.84	0.35	e
1790	V	4	O	-2	1.784	0.37	a
1791	V	4	O	-2	1.776	0.364	bs
1792	V	4	O	-2	1.78	0.37	j
1793	V	4	O	-2	1.735	0.37	j
1794	V	4	S	-2	2.226	0.37	j
1795	V	4	S	-2	2.181	0.37	j
1796	V	4	S	-2	2.24	0.37	e
1797	V	4	F	-1	1.7	0.37	b
1798	V	4	Cl	-1	2.16	0.37	b
1799	V	4	N	-3	1.875	0.37	j
1800	V	5	O	-2	1.803	0.37	a
1801	V	5	O	-2	1.799	0.388	bs
1802	V	5	O	-2	1.799	0.37	x
1803	V	5	S	-2	2.25	0.37	e
1804	V	5	F	-1	1.7	0.37	e
1805	V	5	Cl	-1	2.16	0.37	b
1806	V	9	O	-2	1.788	0.32	ag
1807	V	9	O	-2	1.81	0.34	o
1808	V	9	Br	-1	2.3	0.37	b
1809	V	9	I	-1	2.51	0.37	b
1810	V	9	S	-2	2.23	0.37	b
1811	V	9	Se	-2	2.33	0.37	b
1812	V	9	Te	-2	2.57	0.37	b
1813	V	9	N	-3	1.86	0.37	b
1814	V	9	P	-3	2.31	0.37	b
1815	V	9	As	-3	2.39	0.37	b
1816	V	9	H	-1	1.58	0.37	b
1817	W	4	O	-2	1.851	0.37	aj
1818	W	5	O	-2	1.881	0.37	aj
1819	W	5	O	-2	1.848	0.553	bs
1820	W	6	O	-2	1.917	0.37	a
1821	W	6	O	-2	1.909	0.339	bs
1822	W	6	O	-2	1.916	0.41	x
1823	W	6	O	-2	1.921	0.37	b
1824	W	6	O	-2	1.906	0.37	aj
1825	W	6	F	-1	1.83	0.37	b
1826	W	6	Cl	-1	2.27	0.37	b
1827	W	9	O	-2	1.896	0.28	aj
1828	W	9	Br	-1	2.45	0.37	b
1829	W	9	I	-1	2.66	0.37	b
1830	W	9	S	-2	2.39	0.37	b
1831	W	9	Se	-2	2.51	0.37	b
1832	W	9	Te	-2	2.71	0.37	b
1833	W	9	N	-3	2.06	0.37	b
1834	W	9	P	-3	2.46	0.37	b
1835	W	9	As	-3	2.54	0.37	b
1836	W	9	H	-1	1.76	0.37	b
1837	Xe	2	O	-2	2.05	0.35	e
1838	Xe	2	F	-1	2.02	0.37	e
1839	Xe	4	F	-1	1.93	0.37	e
1840	Xe	6	O	-2	2	0.37	e
1841	Xe	6	F	-1	1.89	0.37	e
1842	Xe	8	O	-2	1.94	0.37	e
1843	Y	3	O	-2	2.028	0.35	bj
1844	Y	3	O	-2	1.978	0.407	bs
1845	Y	3	O	-2	2.019	0.37	a
1846	Y	3	O	-2	2.014	0.37	b
1847	Y	3	S	-2	2.48	0.37	b
1848	Y	3	Se	-2	2.61	0.37	b
1849	Y	3	Te	-2	2.8	0.37	b
1850	Y	3	F	-1	1.904	0.37	b
1851	Y	3	F	-1	1.87	0.37	e
1852	Y	3	Cl	-1	2.4	0.37	b
1853	Y	3	Br	-1	2.55	0.37	b
1854	Y	3	I	-1	2.77	0.37	b
1855	Y	3	N	-3	2.17	0.37	b
1856	Y	3	P	-3	2.57	0.37	b
1857	Y	3	As	-3	2.64	0.37	b
1858	Y	3	H	-1	1.86	0.37	b
1859	Yb	2	O	-2	1.989	0.37	al
1860	Yb	2	N	-3	2.092	0.37	al
1861	Yb	3	O	-2	1.965	0.37	a
1862	Yb	3	O	-2	1.969	0.373	bs
1863	Yb	3	O	-2	1.985	0.37	b
1864	Yb	3	O	-2	1.954	0.37	ae
1865	Yb	3	S	-2	2.43	0.37	b
1866	Yb	3	Se	-2	2.56	0.37	b
1867	Yb	3	Te	-2	2.76	0.37	b
1868	Yb	3	F	-1	1.875	0.37	b
1869	Yb	3	F	-1	1.85	0.4	p
1870	Yb	3	F	-1	1.9	0.37	e
1871	Yb	3	Cl	-1	2.371	0.37	b
1872	Yb	3	Cl	-1	2.376	0.37	al
1873	Yb	3	Cl	-1	2.34	0.4	p
1874	Yb	3	Br	-1	2.451	0.37	b
1875	Yb	3	Br	-1	2.49	0.4	p
1876	Yb	3	I	-1	2.72	0.37	b
1877	Yb	3	I	-1	2.74	0.4	p
1878	Yb	3	N	-3	2.064	0.37	ah
1879	Yb	3	N	-3	2.12	0.37	b
1880	Yb	3	P	-3	2.53	0.37	b
1881	Yb	3	As	-3	2.59	0.37	b
1882	Yb	3	H	-1	1.82	0.37	b
1883	Zn	2	O	-2	1.704	0.37	a
1884	Zn	2	O	-2	1.684	0.383	bs
1885	Zn	2	O	-2	1.675	0.39	o
1886	Zn	2	S	-2	2.09	0.37	b
1887	Zn	2	Se	-2	2.22	0.37	b
1888	Zn	2	Te	-2	2.45	0.37	b
1889	Zn	2	F	-1	1.62	0.37	b
1890	Zn	2	F	-1	1.67	0.37	e
1891	Zn	2	Cl	-1	2.01	0.37	b
1892	Zn	2	Br	-1	2.15	0.37	b
1893	Zn	2	I	-1	2.36	0.37	b
1894	Zn	2	N	-3	1.77	0.37	b
1895	Zn	2	P	-3	2.15	0.37	b
1896	Zn	2	As	-3	2.24	0.37	b
1897	Zn	2	H	-1	1.42	0.37	b
1898	Zr	2	O	-2	2.34	0.37	e
1899	Zr	2	F	-1	2.24	0.37	e
1900	Zr	2	Cl	-1	2.58	0.37	e
1901	Zr	4	O	-2	1.928	0.37	a
1902	Zr	4	O	-2	1.913	0.406	bs
1903	Zr	4	O	-2	1.937	0.37	b
1904	Zr	4	S	-2	2.41	0.37	b
1905	Zr	4	Se	-2	2.53	0.37	b
1906	Zr	4	Te	-2	2.67	0.37	b
1907	Zr	4	F	-1	1.846	0.37	a
1908	Zr	4	F	-1	1.854	0.37	b
1909	Zr	4	Cl	-1	2.33	0.37	b
1910	Zr	4	Br	-1	2.48	0.37	b
1911	Zr	4	I	-1	2.69	0.37	b
1912	Zr	4	N	-3	2.11	0.37	b
1913	Zr	4	N	-3	2.15	0.37	e
1914	Zr	4	P	-3	2.52	0.37	b
1915	Zr	4	As	-3	2.57	0.37	b
1916	Zr	4	H	-1	1.79	0.37	b
